# Supplementary material for: The co-evolution of the genome and epigenome in colorectal cancer
Source: Research Square preprint supplement (doi:10.21203/rs.3.rs-797138/v1), 2021-09-08

MSS (Clonal) – SPS1

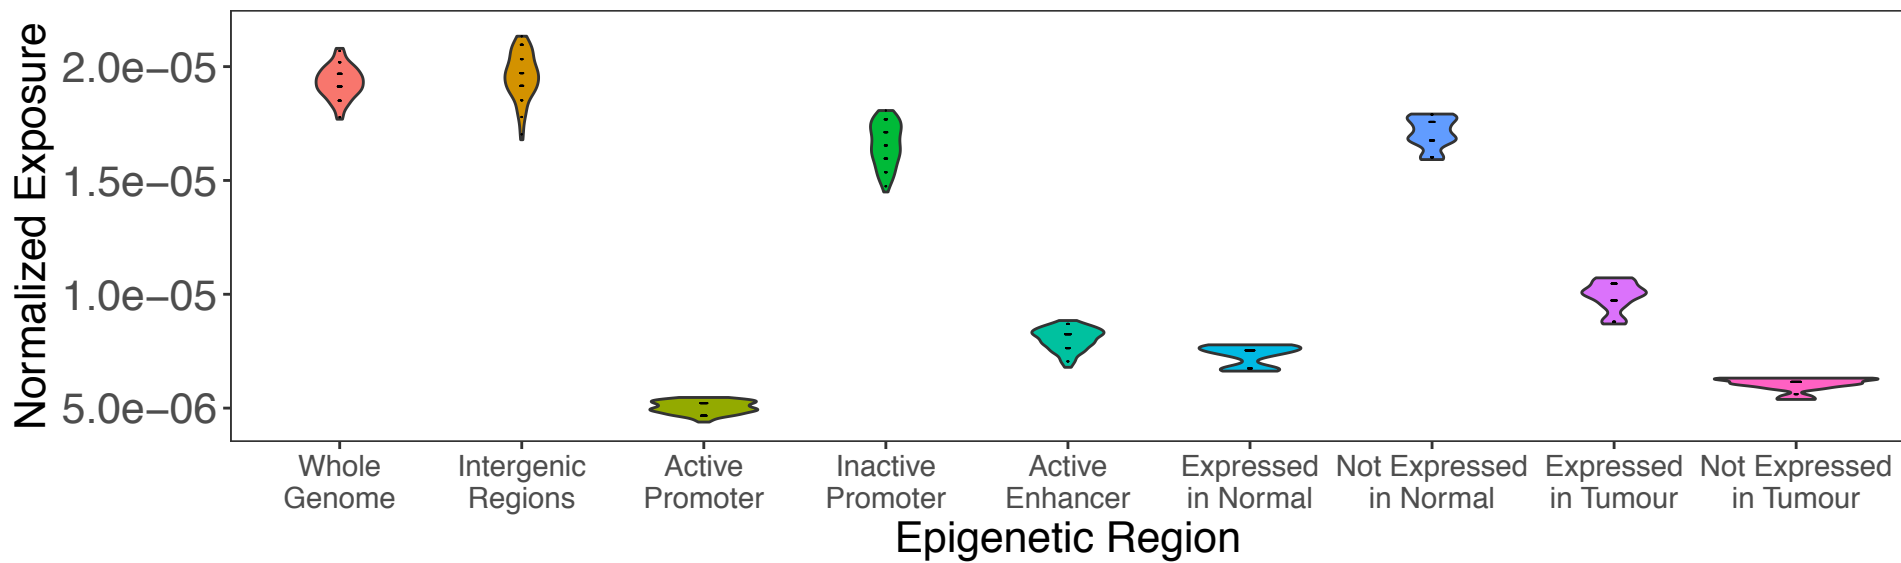

MSS (Clonal) – SPS2

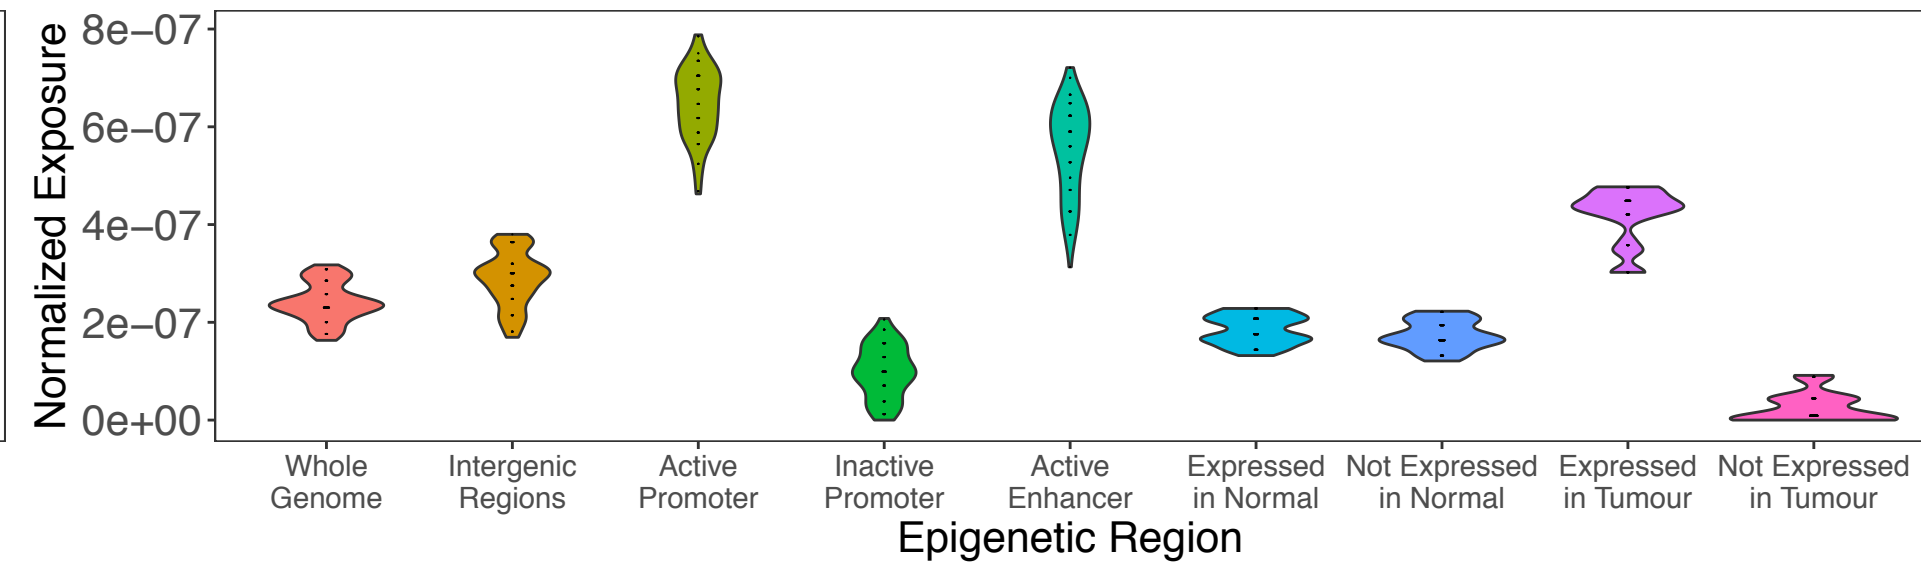

MSS (Clonal) – SPS3

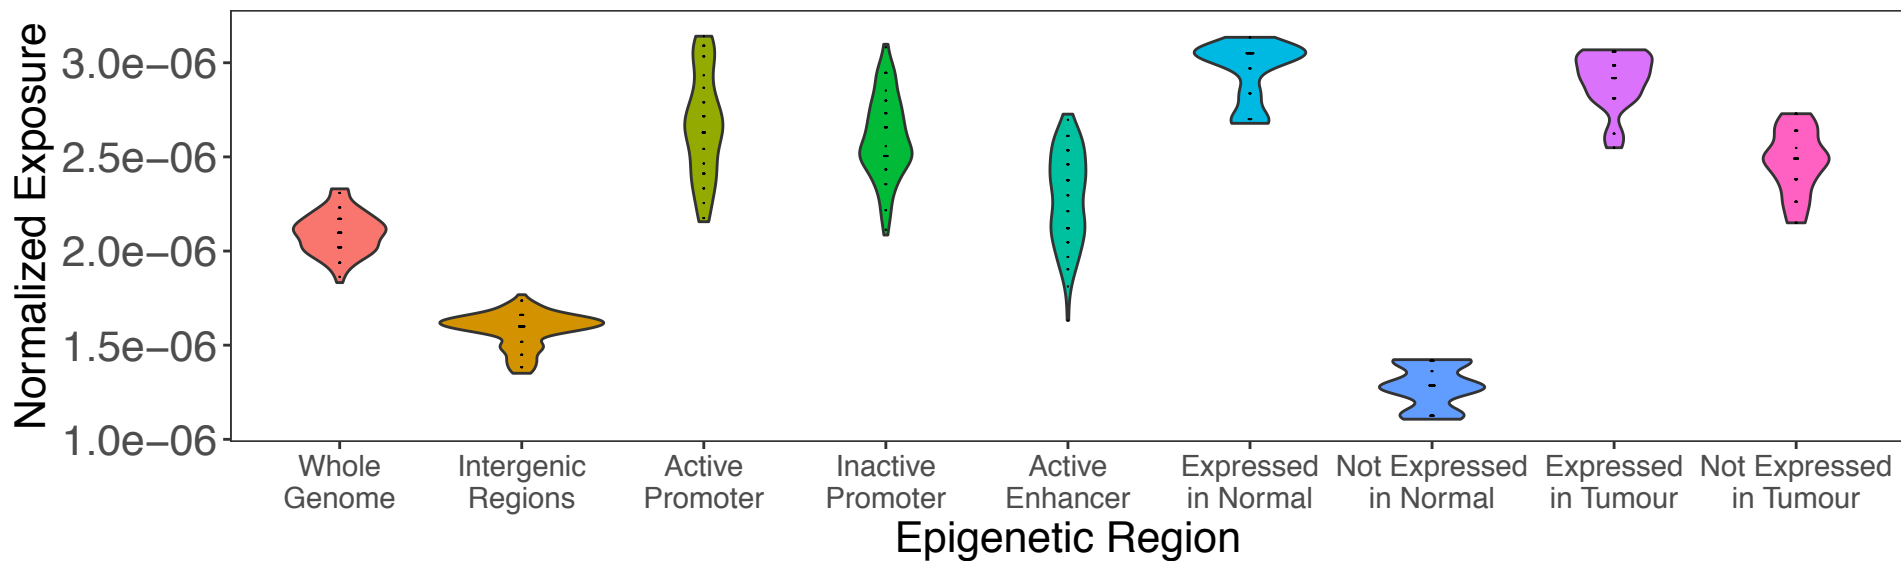

MSS (Clonal) – SPS4

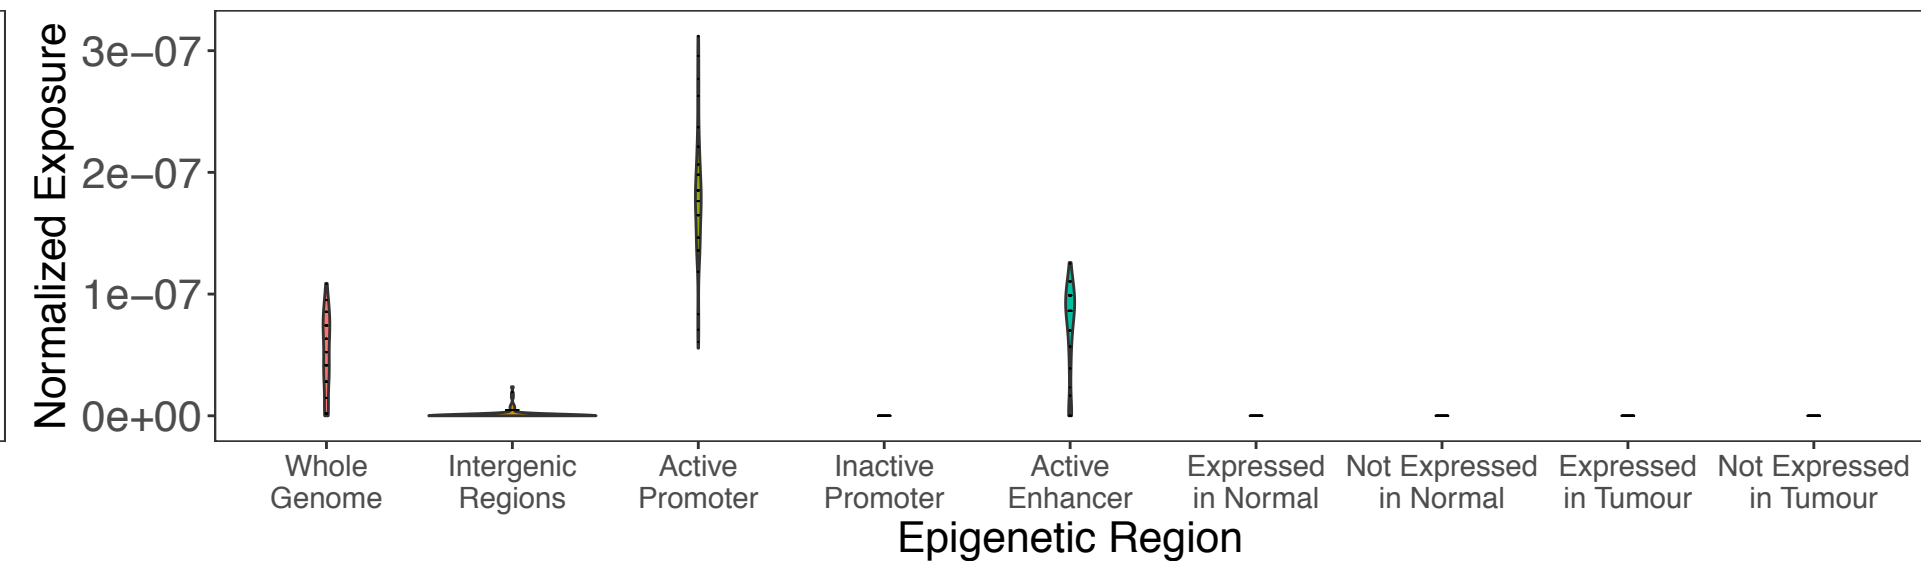

MSS (Clonal) – SPS5

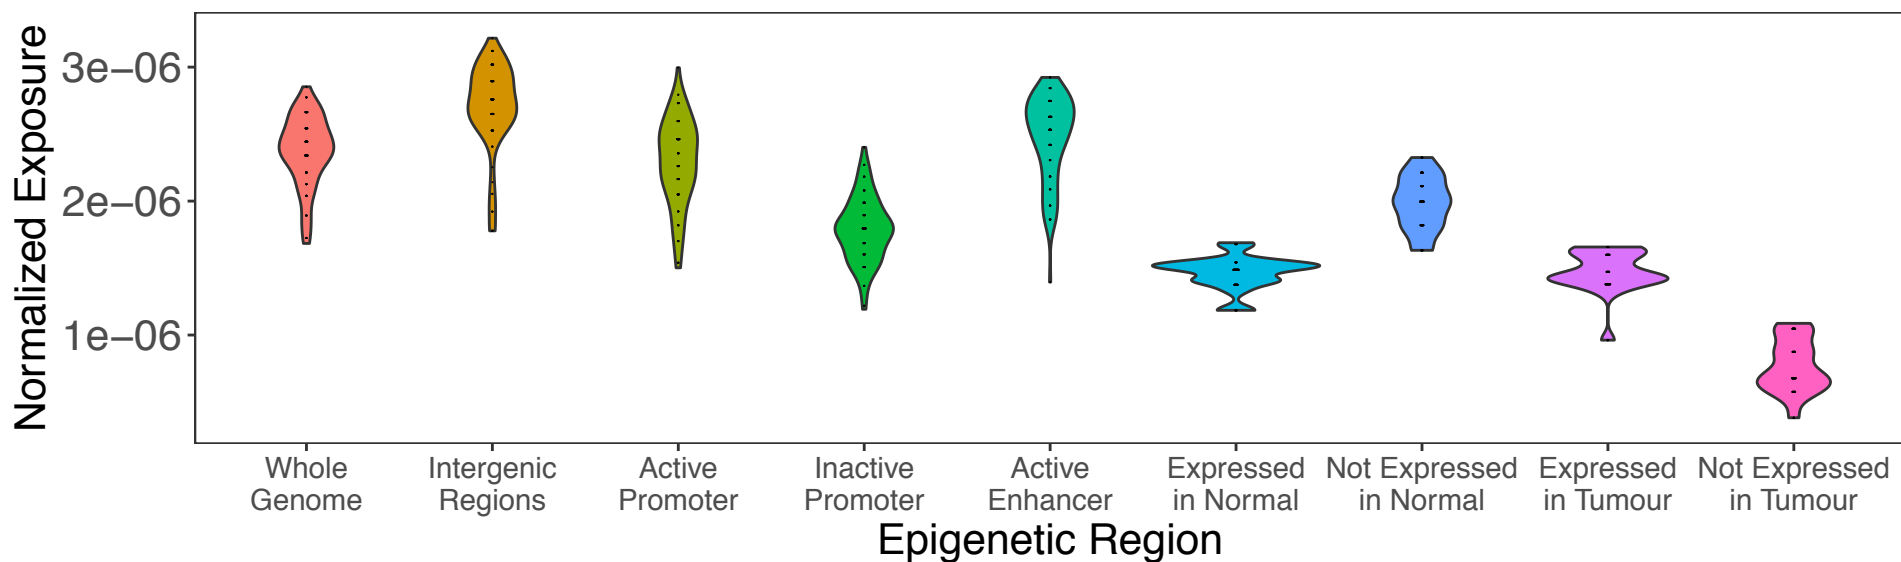

MSS (Clonal) – SPS6

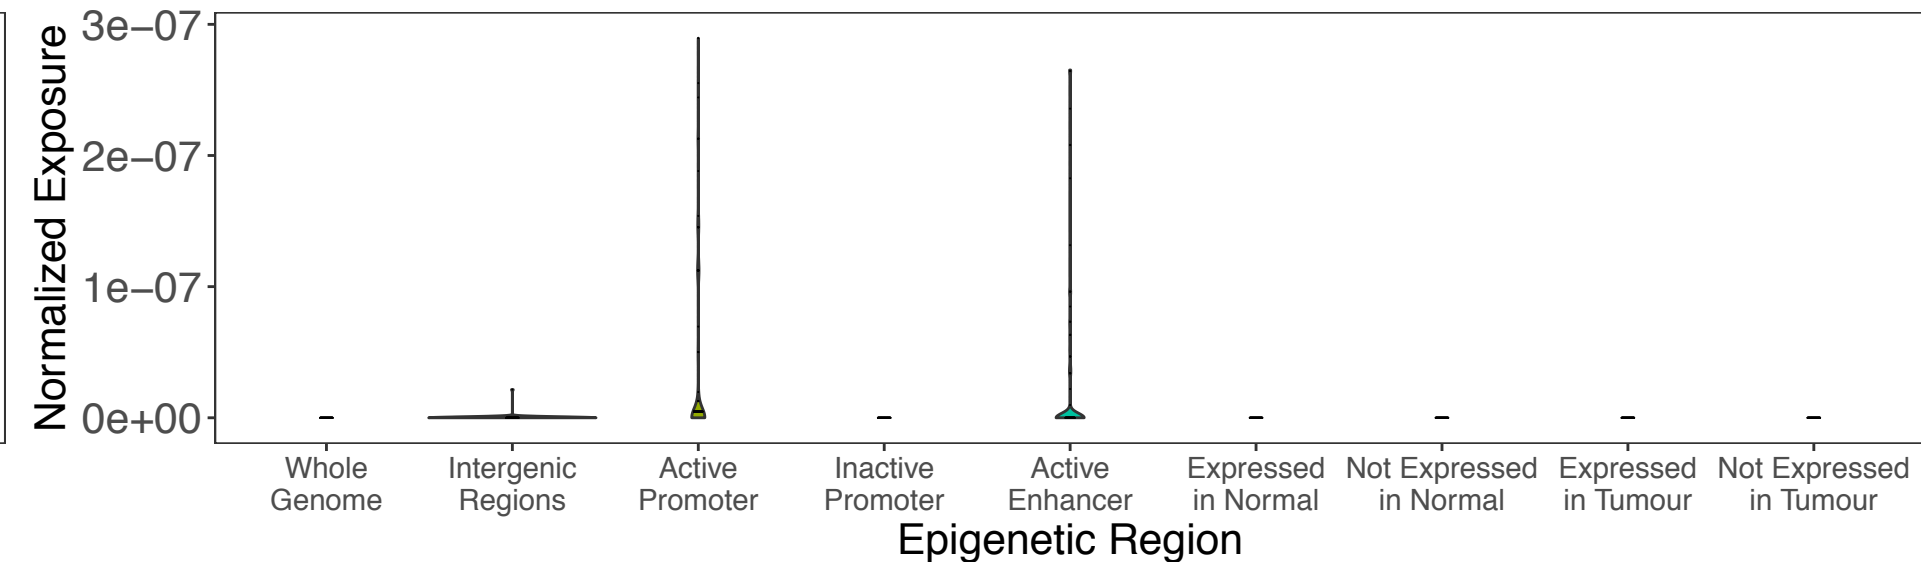

MSS (subclonal) – SPS1

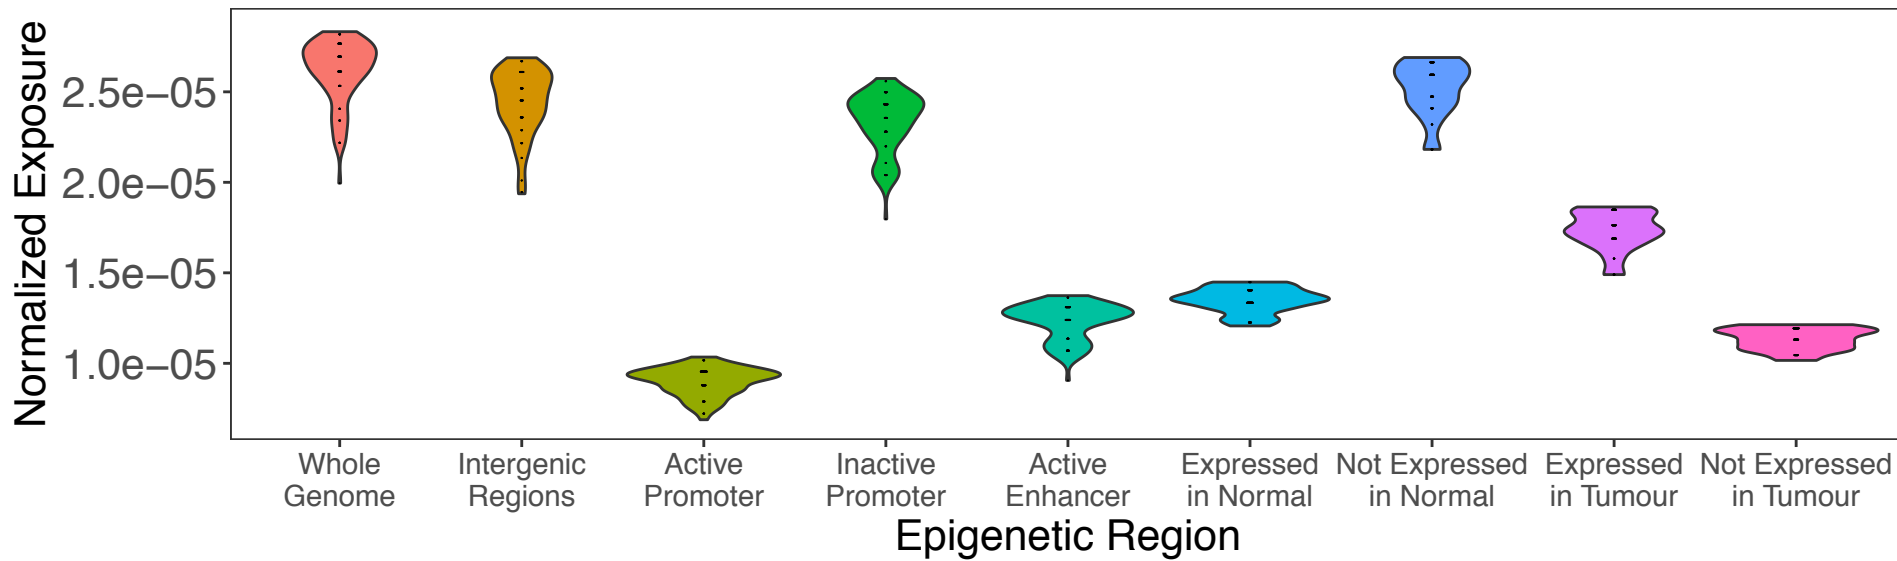

MSS (subclonal) – SPS2

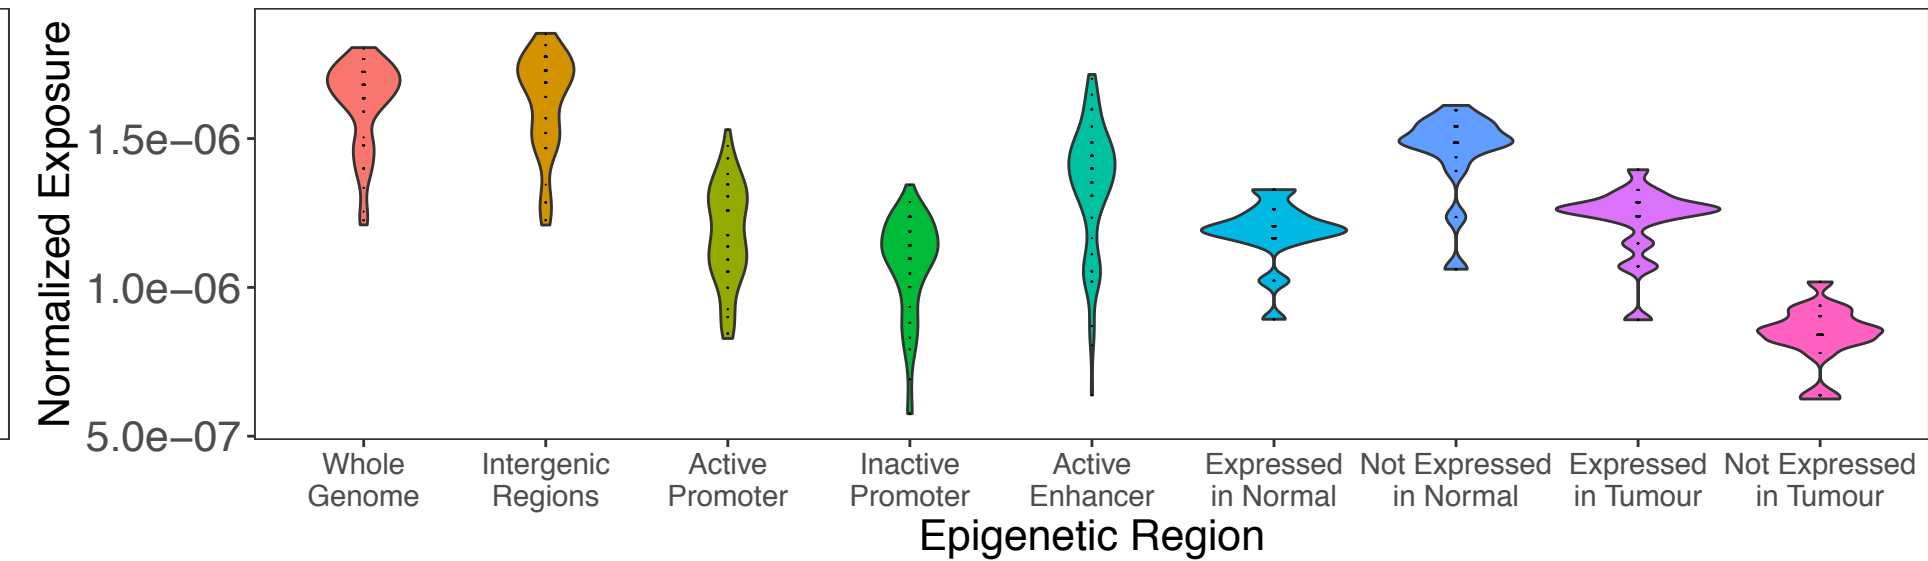

MSS (subclonal) – SPS3

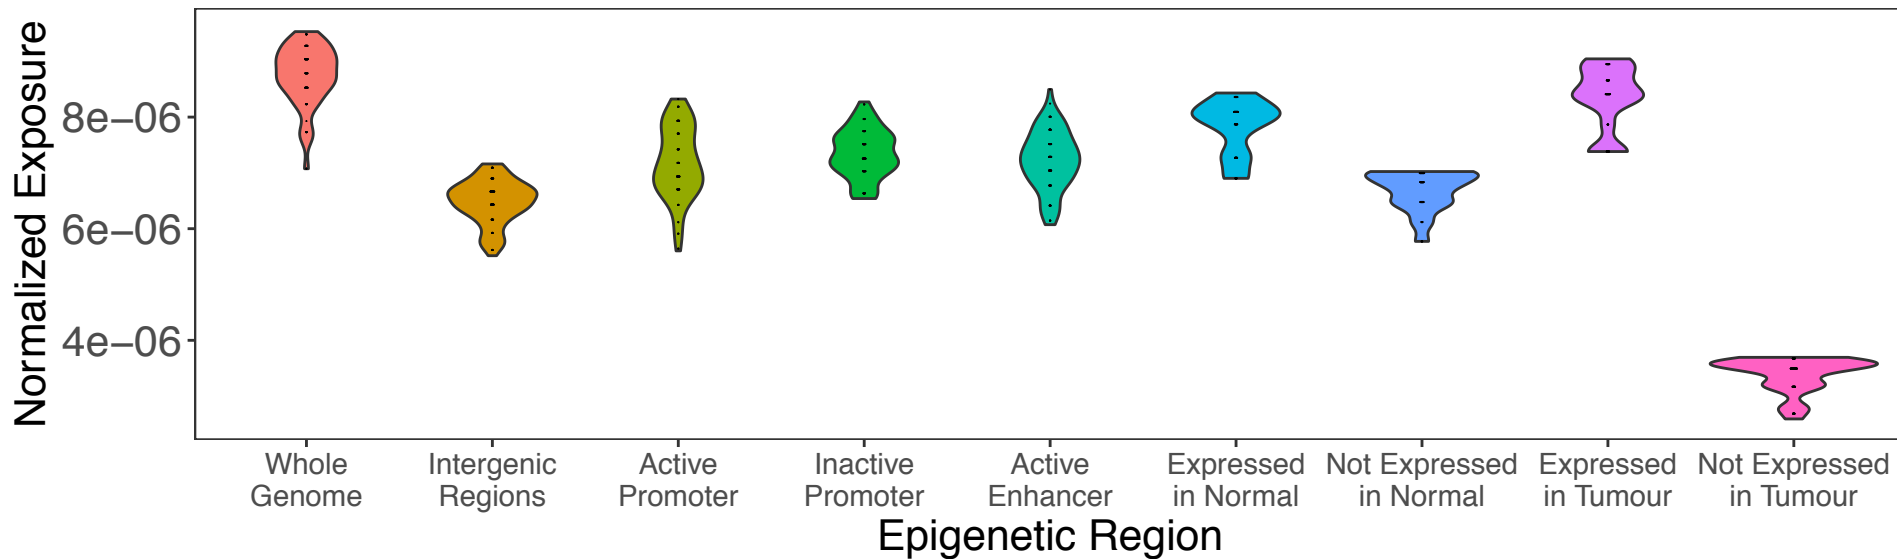

MSS (subclonal) – SPS4

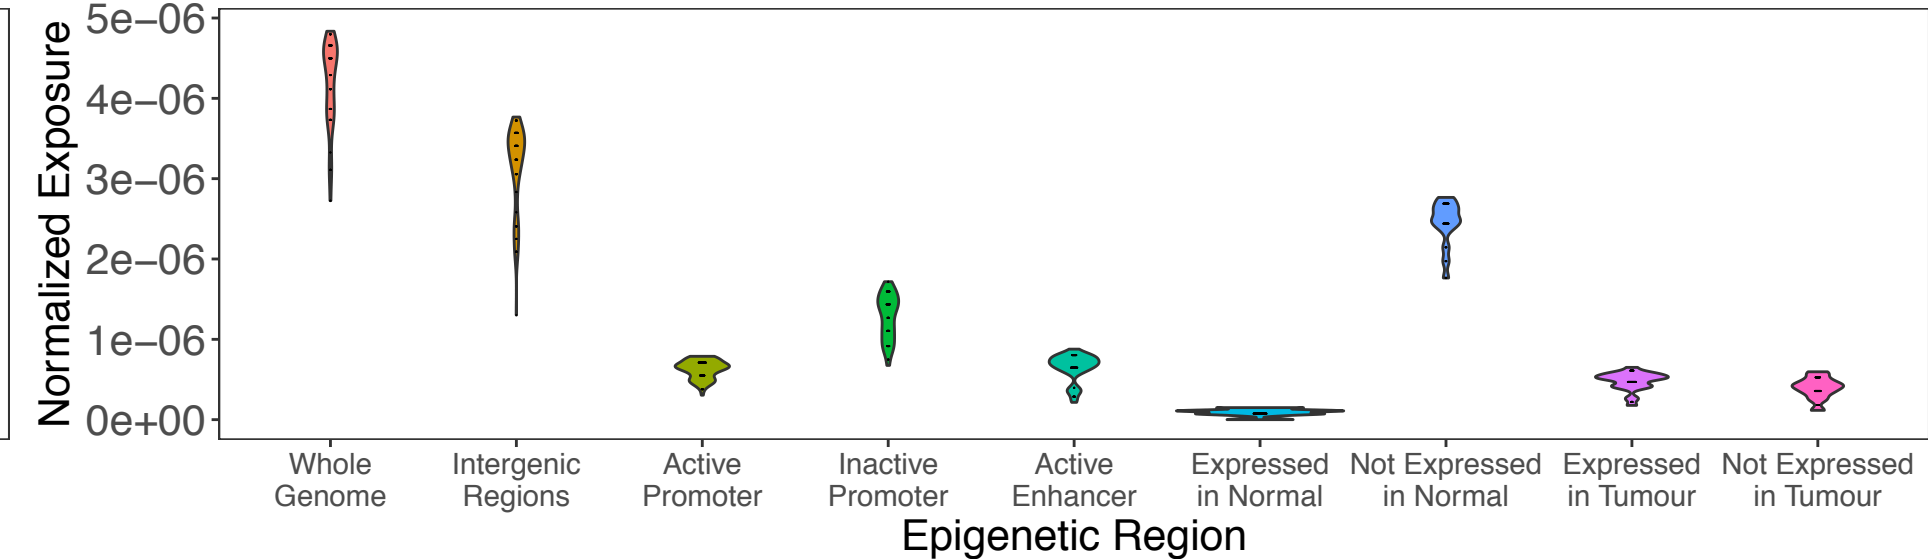

MSS (subclonal) – SPS5

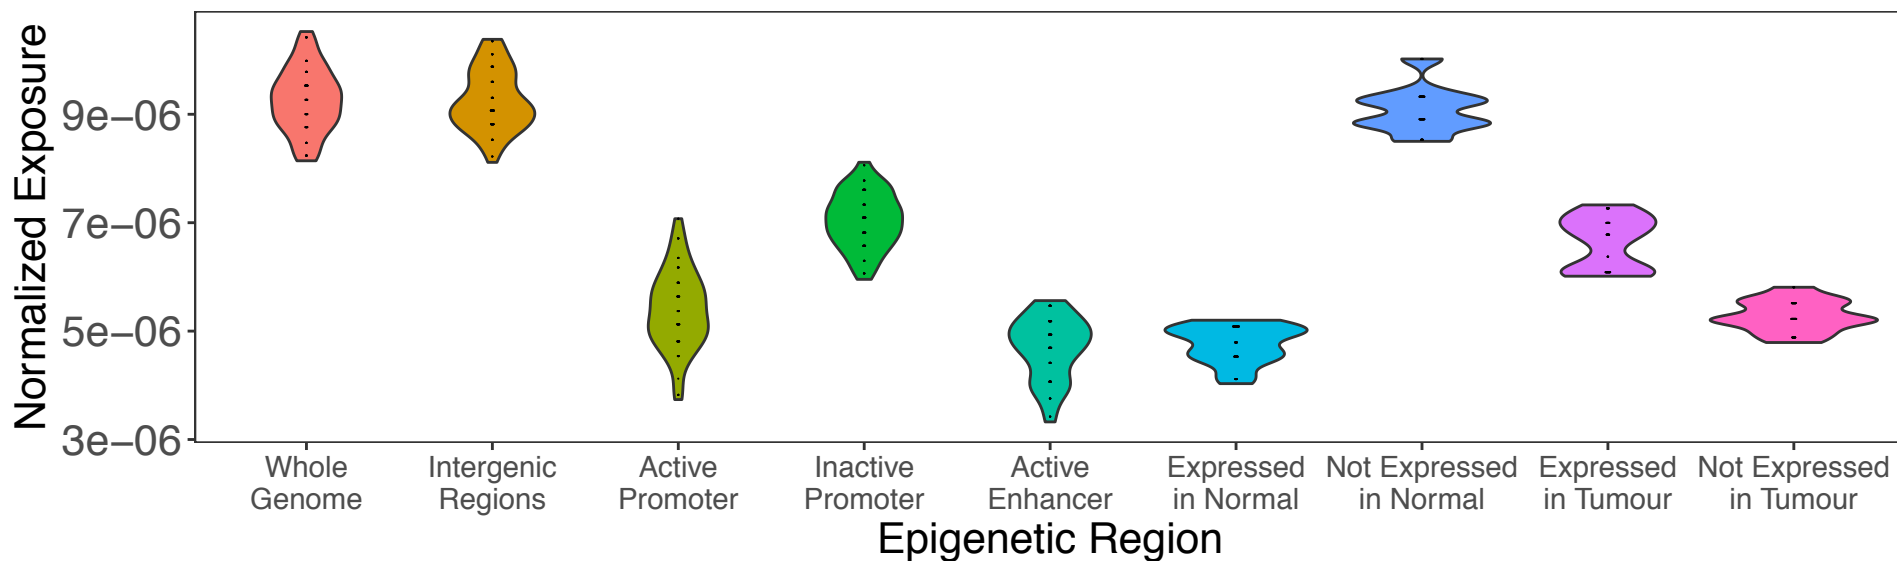

MSS (subclonal) – SPS6

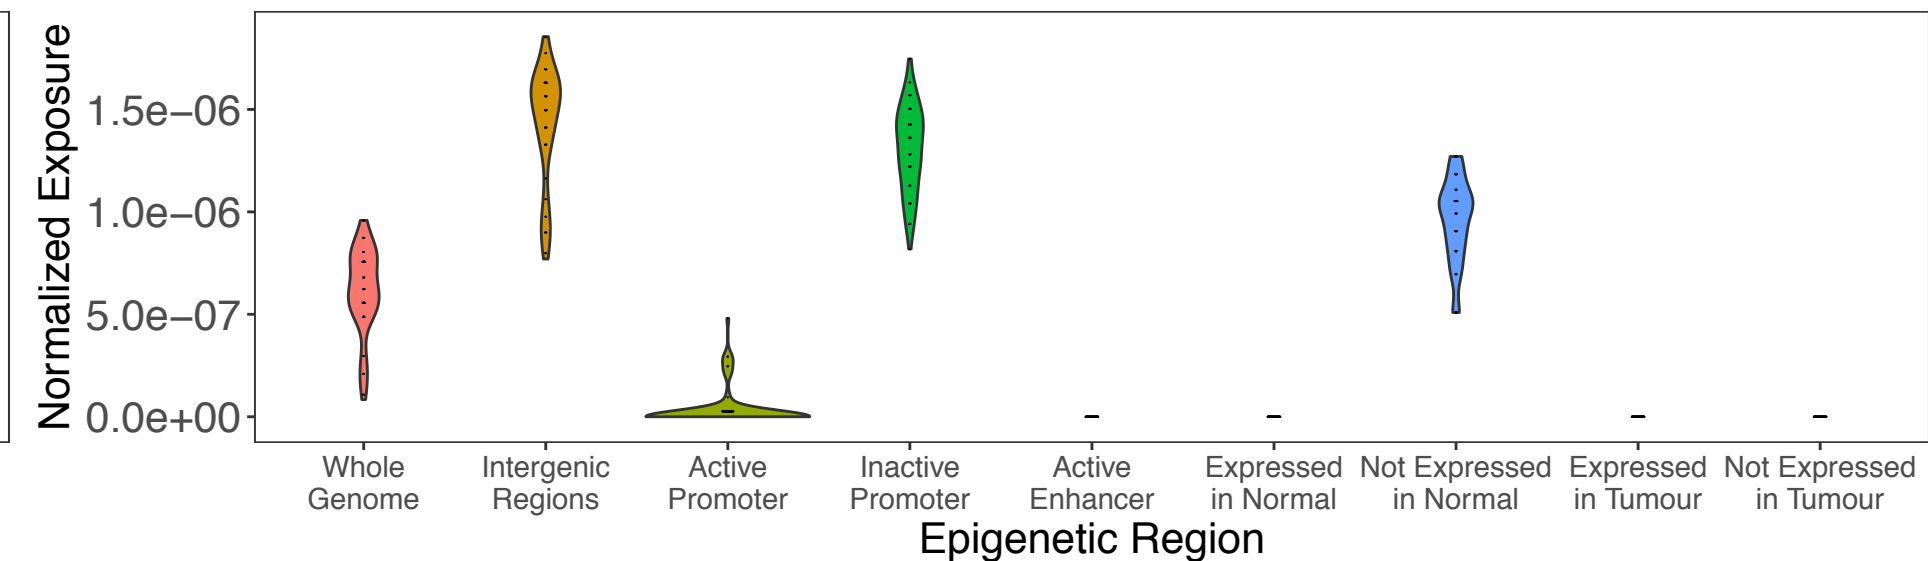

MSI (Clonal) – SPS1

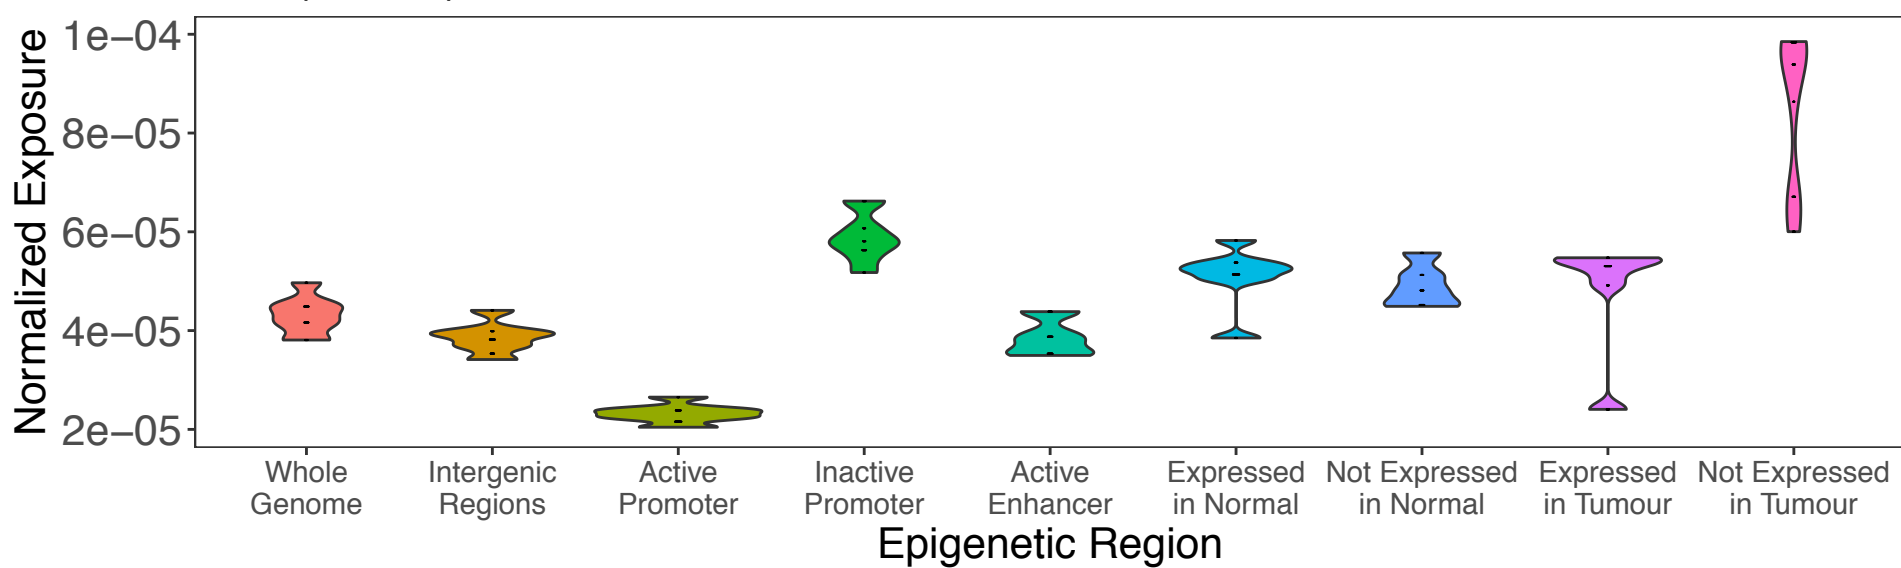

MSI (Clonal) – SPS2

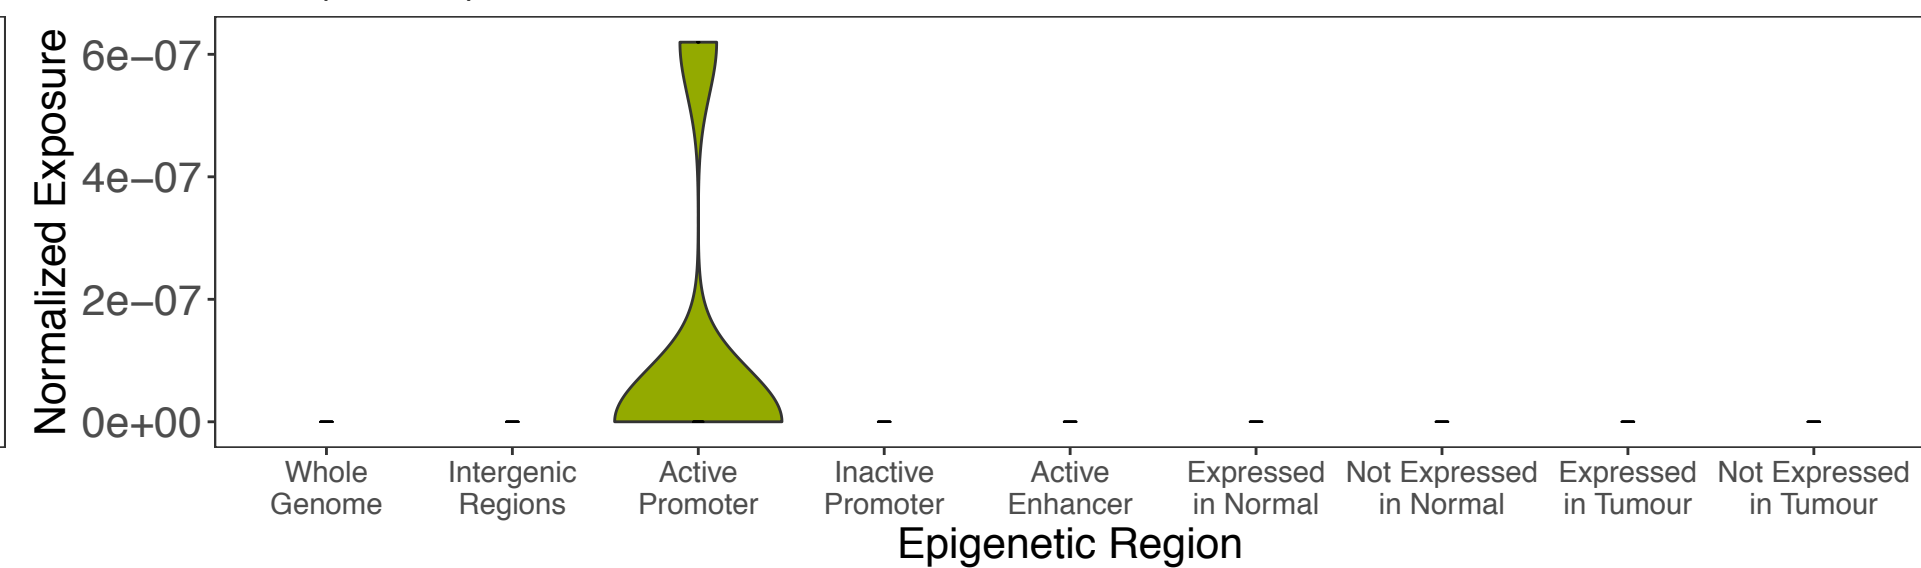

MSI (Clonal) – SPS3

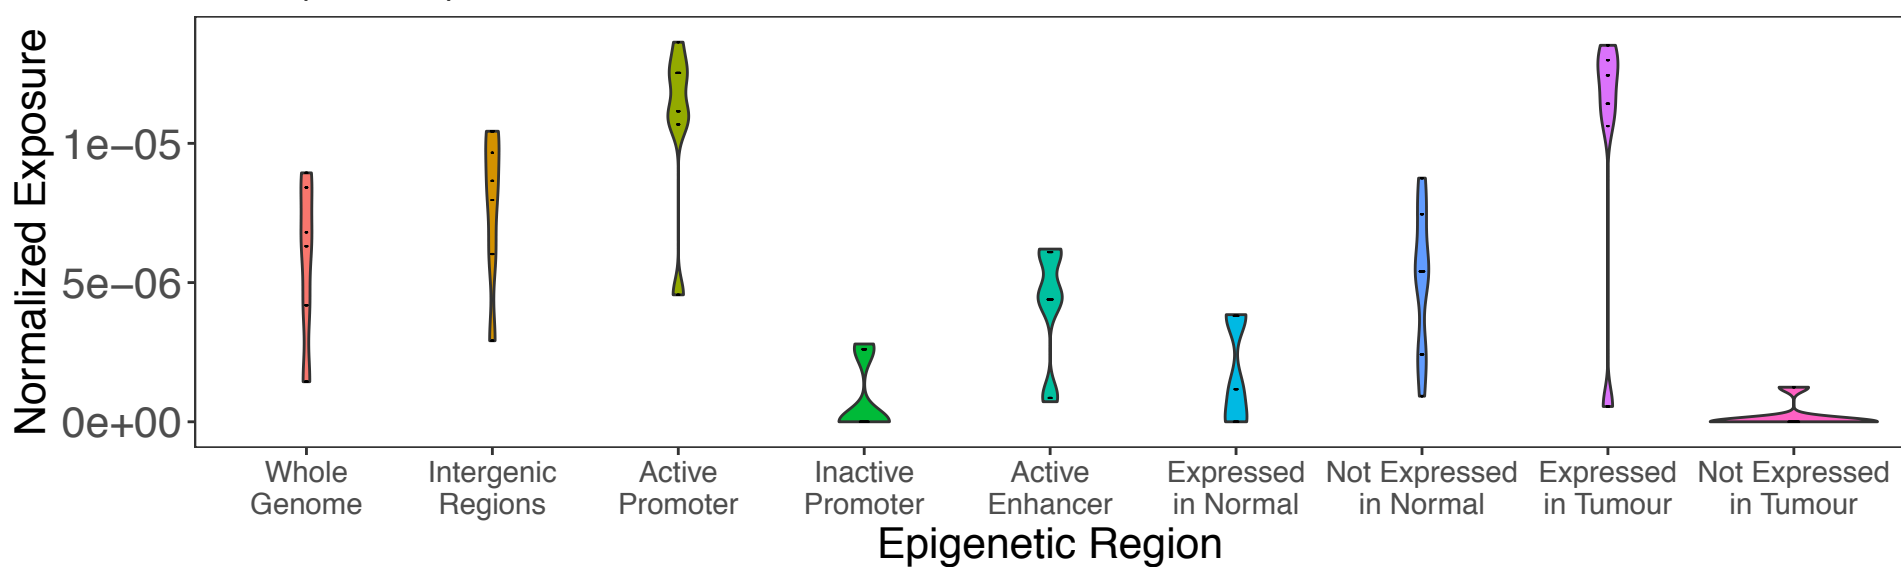

MSI (Clonal) – SPS4

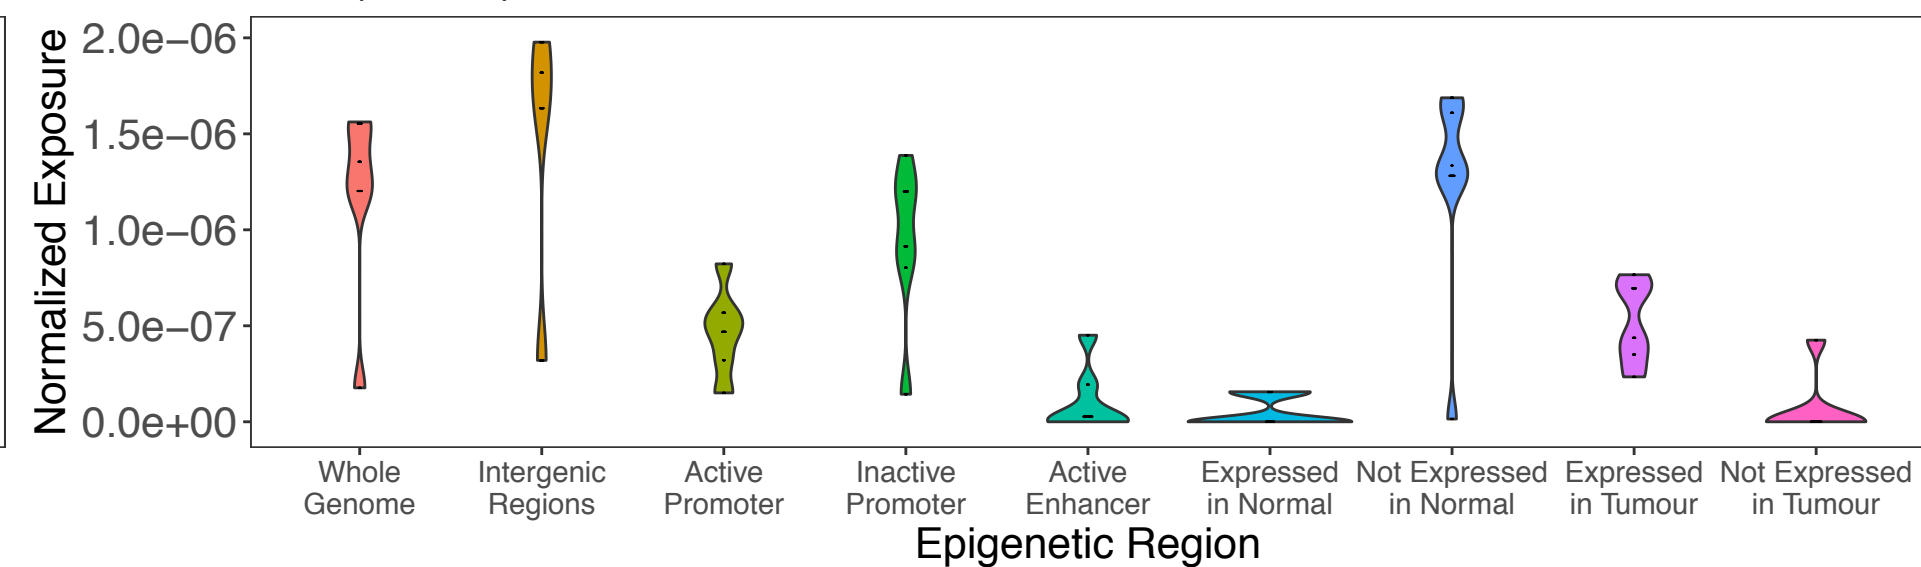

MSI (Clonal) – SPS5

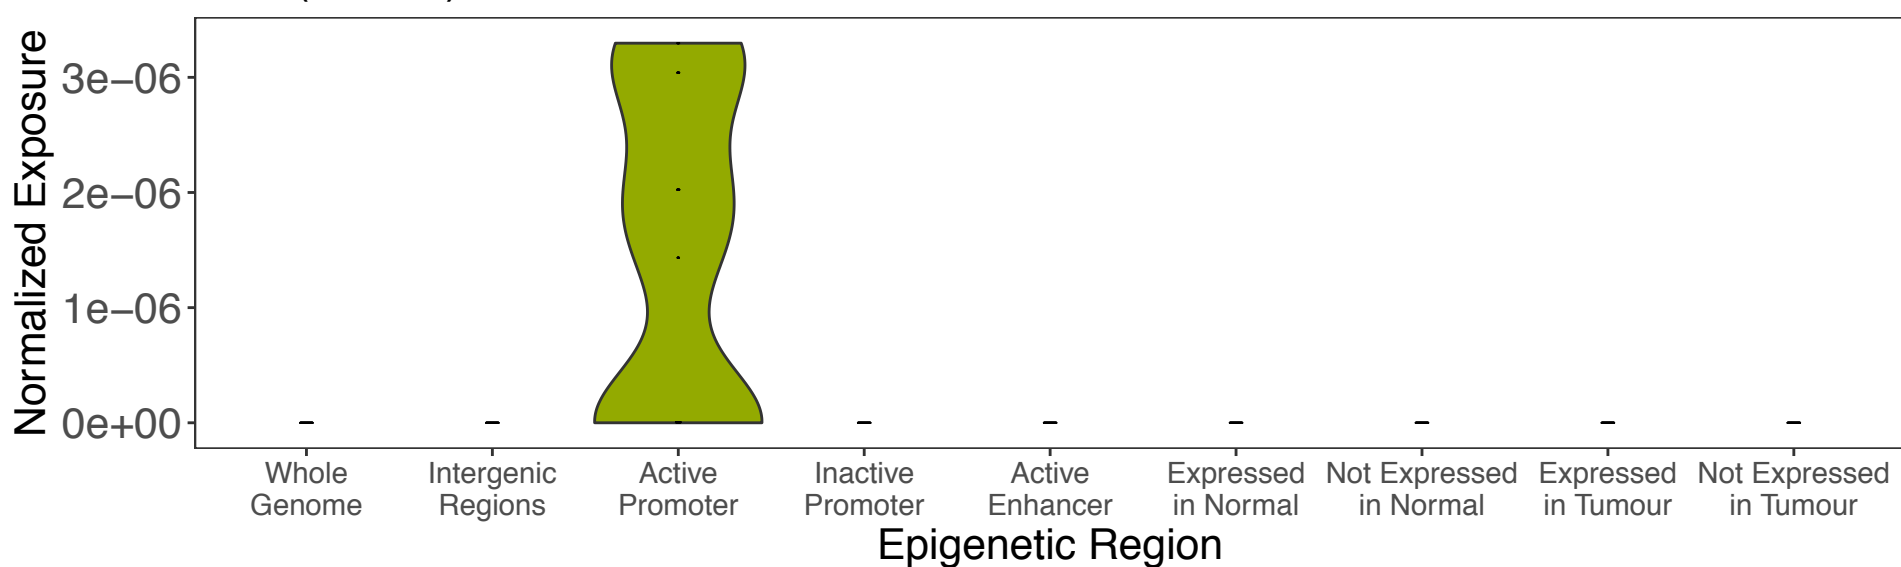

MSI (Clonal) – SPS6

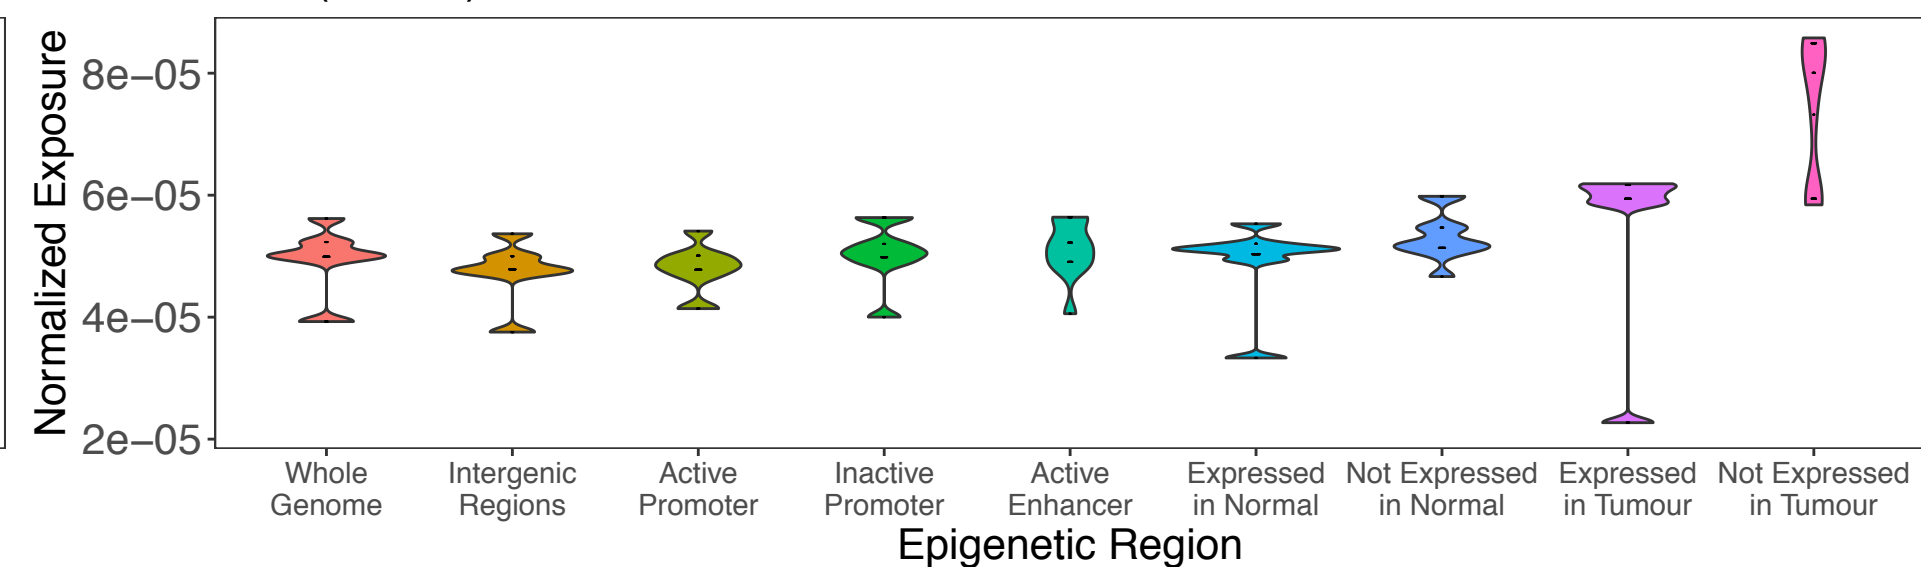

MSI (subclonal) – SPS1

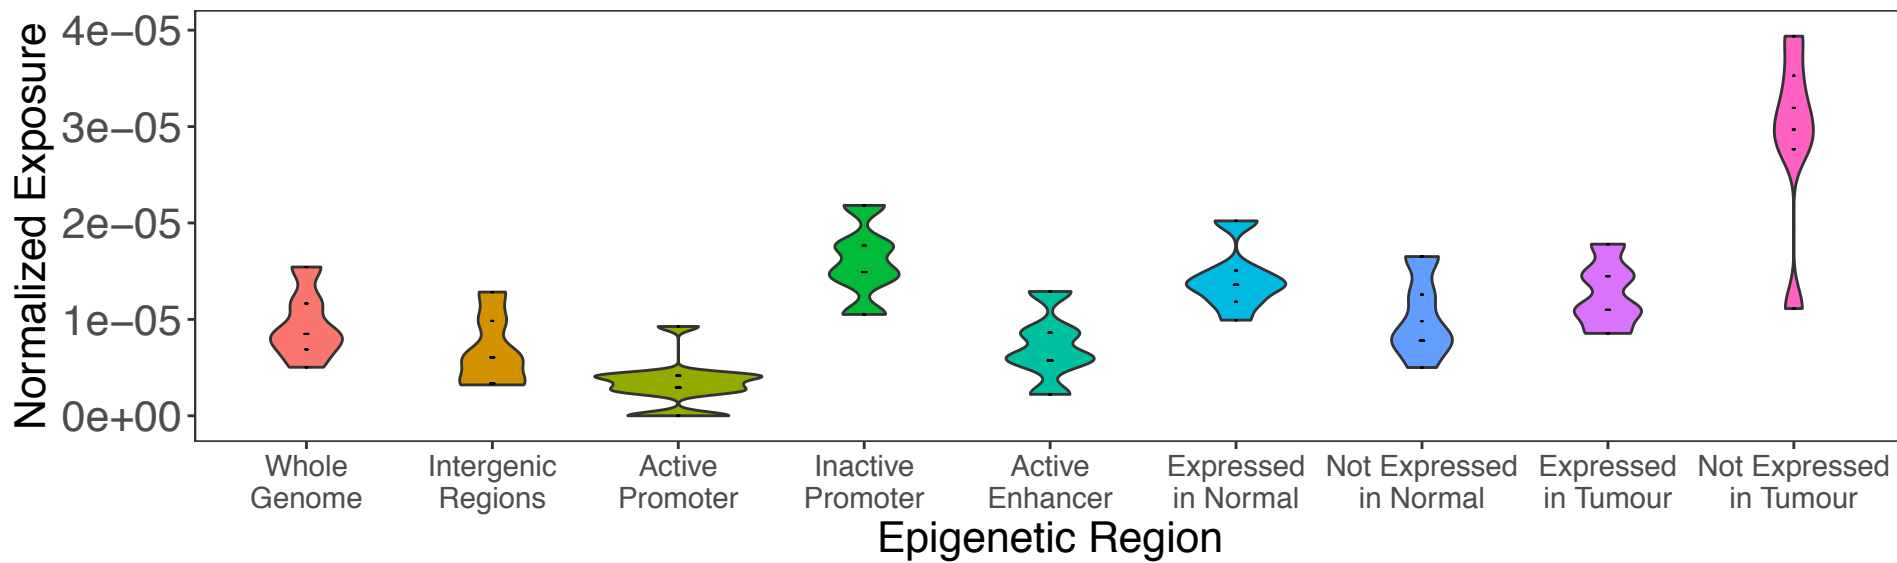

MSI (subclonal) – SPS2

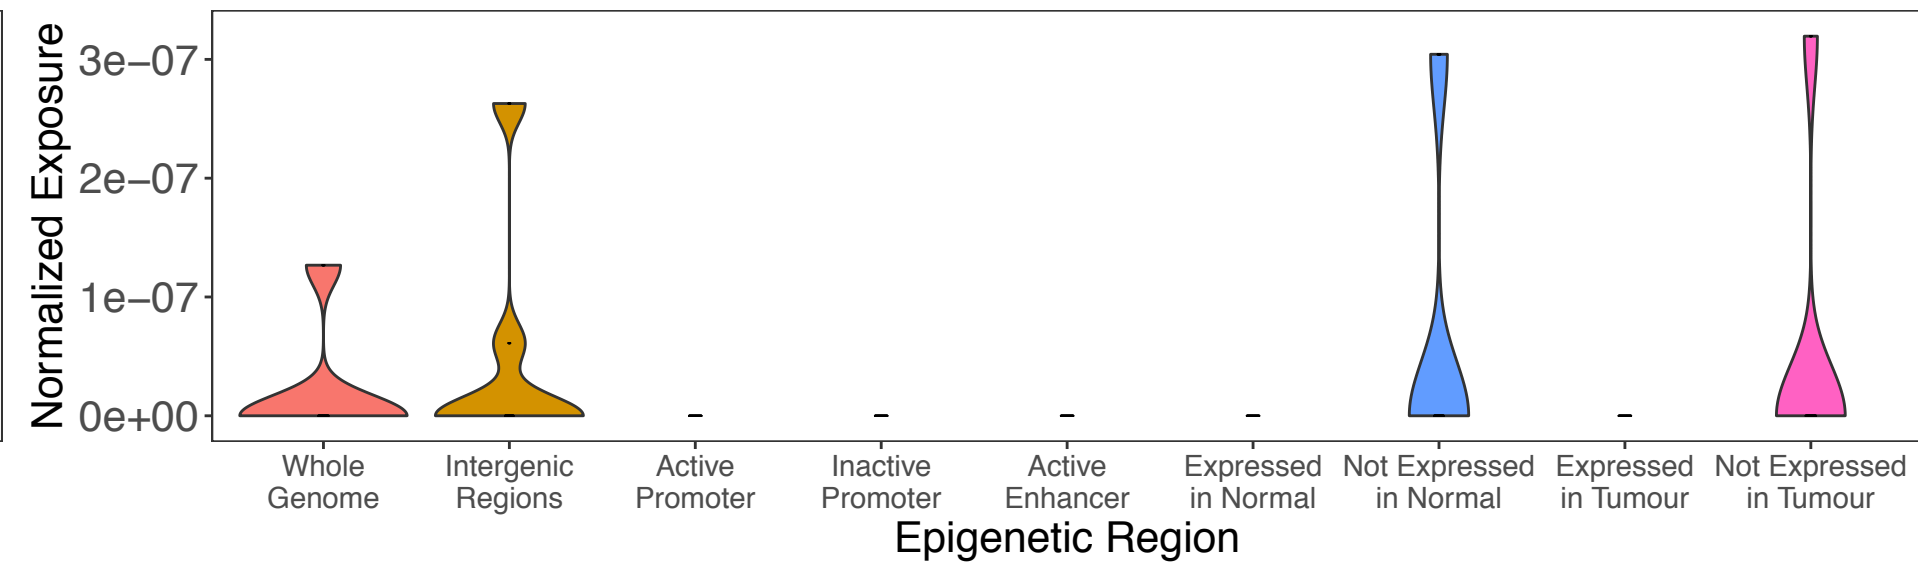

MSI (subclonal) – SPS3

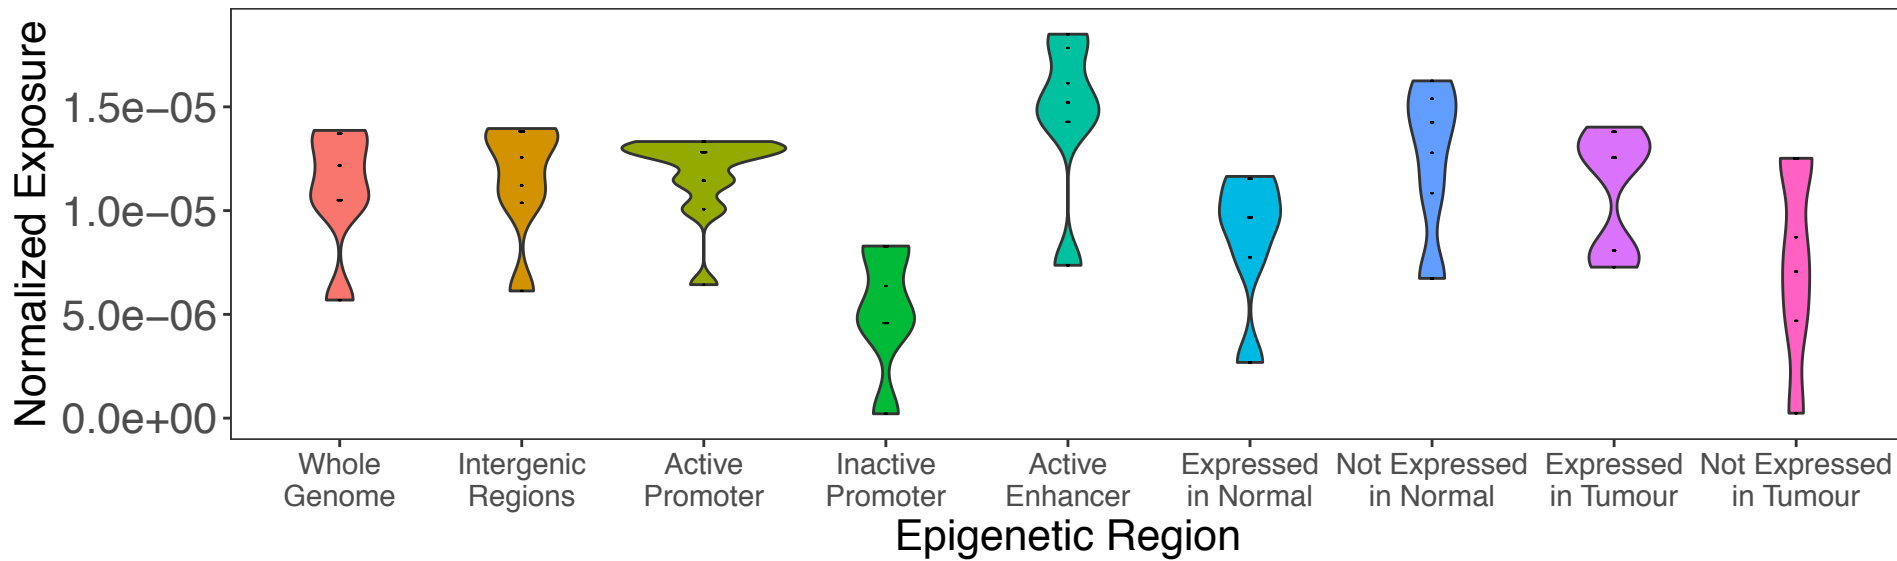

MSI (subclonal) – SPS4

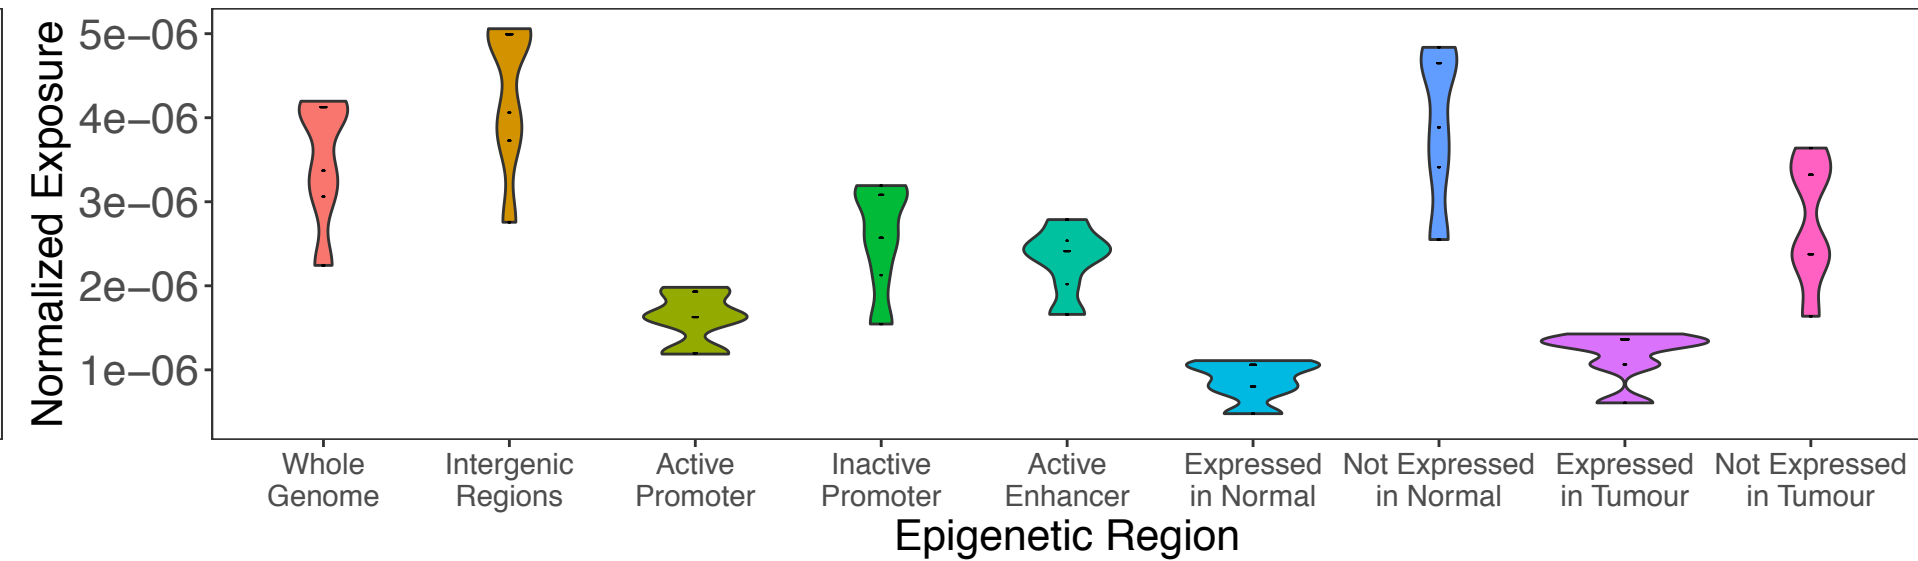

MSI (subclonal) – SPS5

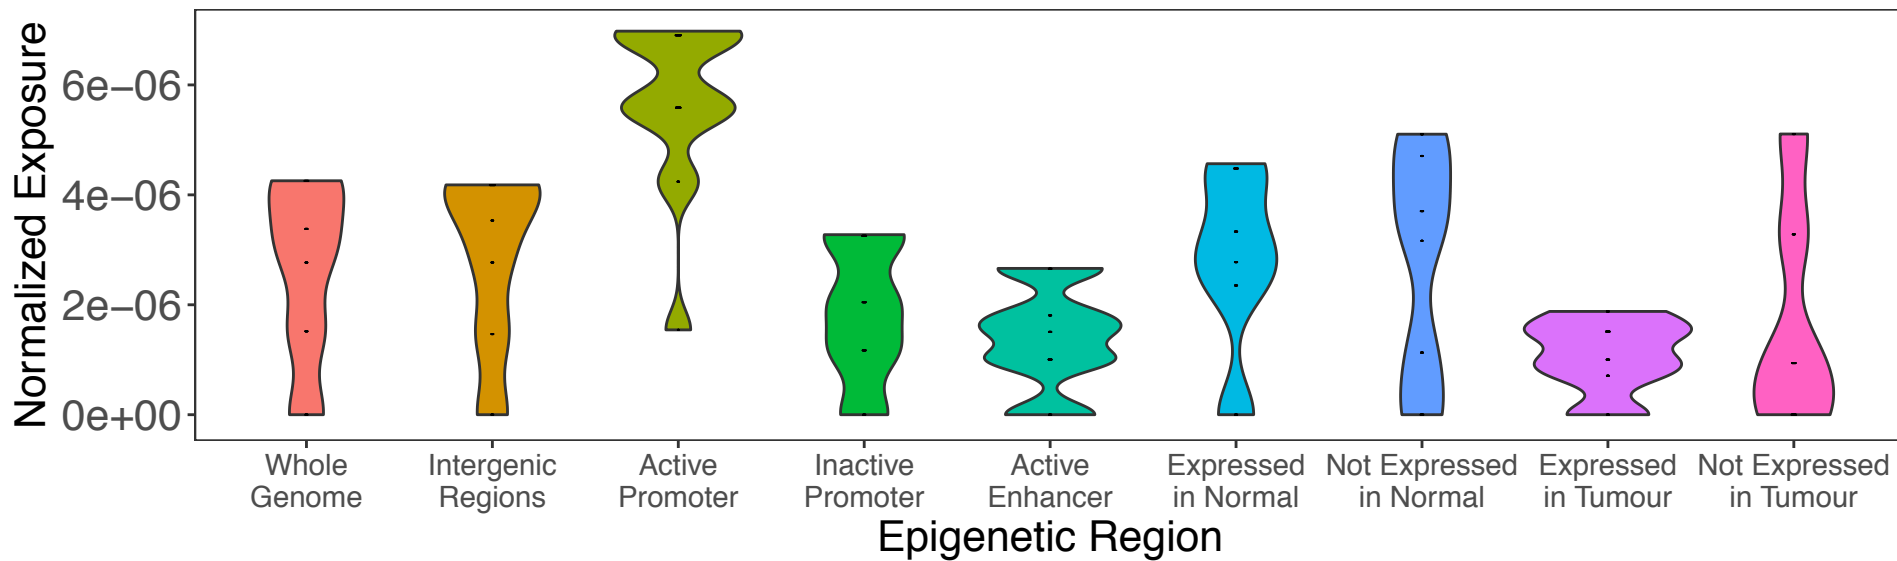

MSI (subclonal) – SPS6

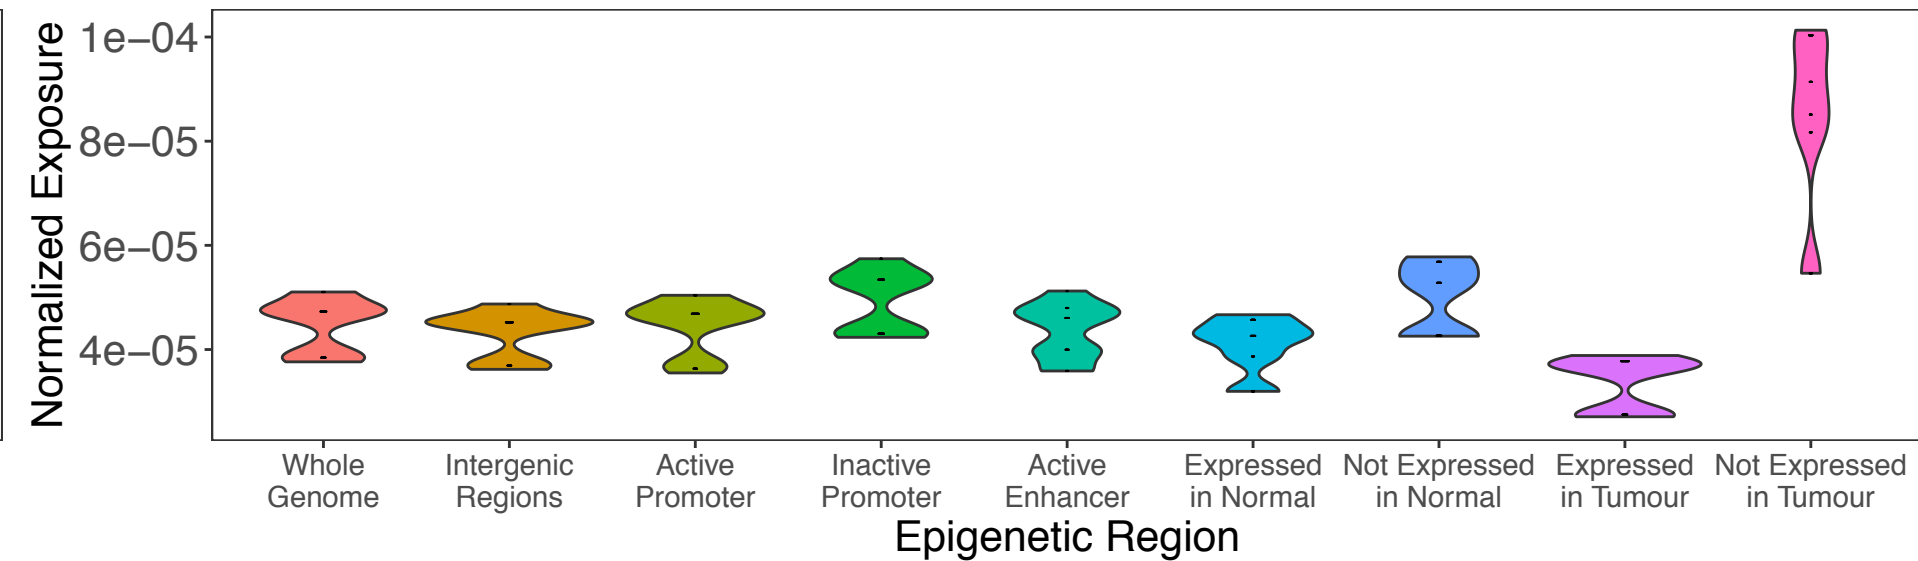

Supplement: Supplementary file 1 [file 145e78fb479aae259dc8e4ff.pdf]
