# Supplementary material for: The co-evolution of the genome and epigenome in colorectal cancer
Source: Research Square preprint supplement (doi:10.21203/rs.3.rs-797138/v1), 2021-09-08
Supplement: Supplementary file 2 [file 9eed8fafbdb1bb0fe73f0973.pdf]

# AC0125311\_uc\_cTSS\_nPEAK

+ 10/33 (1/116), - 4/33 (39/116)

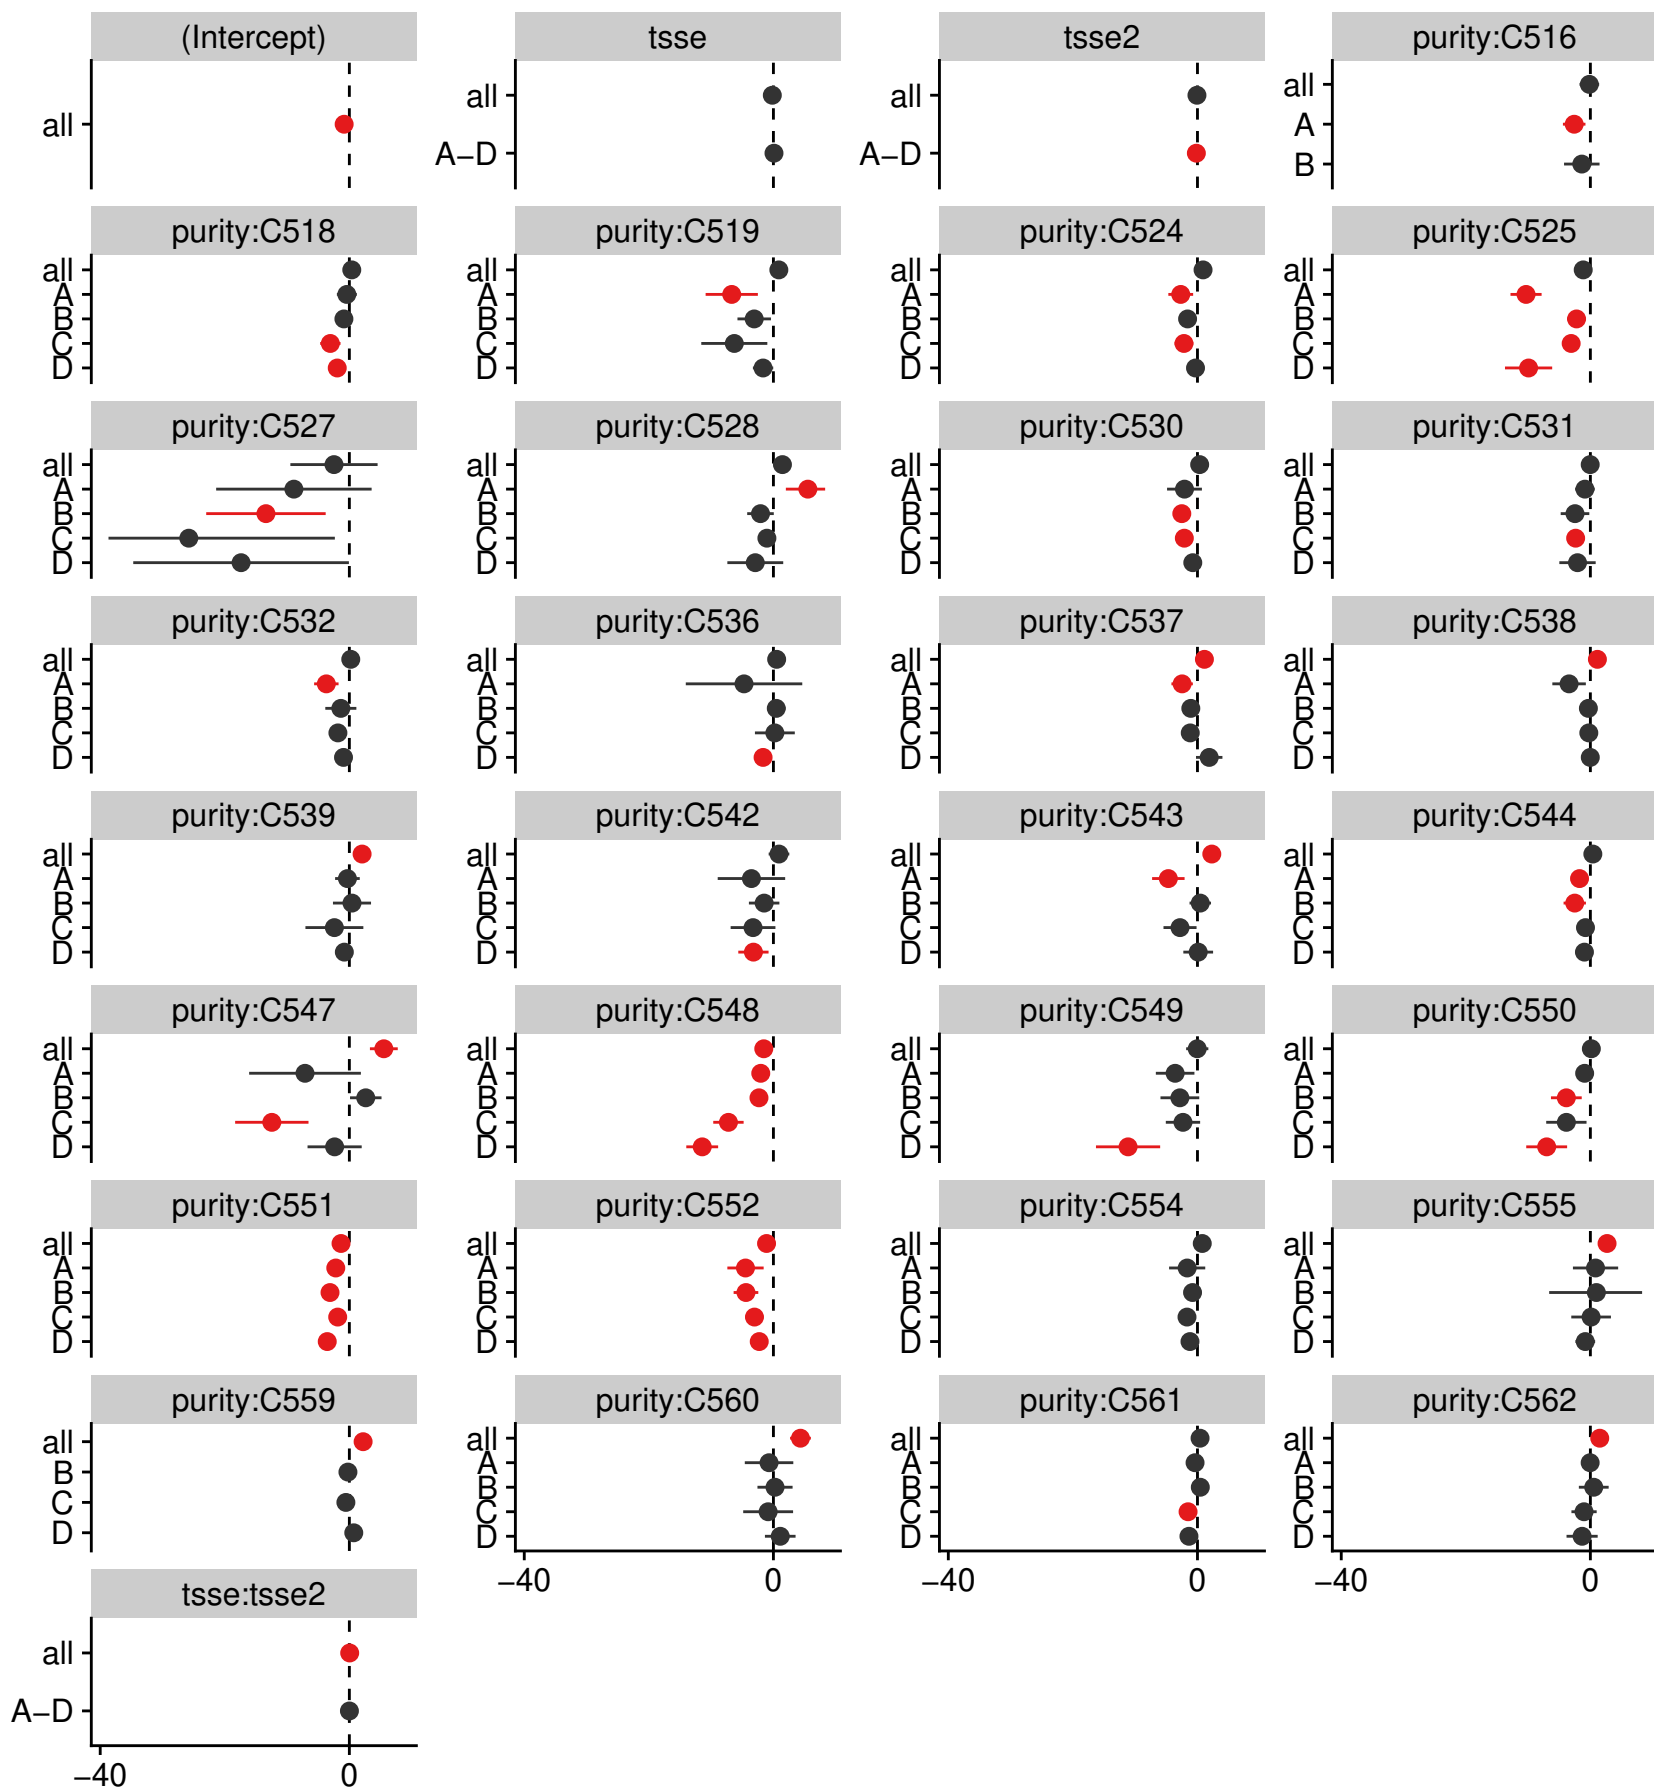

p\_c = < 2.22e-16, p\_sc = 0.021685

# AC0125311\_uc\_dTSS\_oPEAK

+ 12/33 (0/116), - 4/33 (42/116)

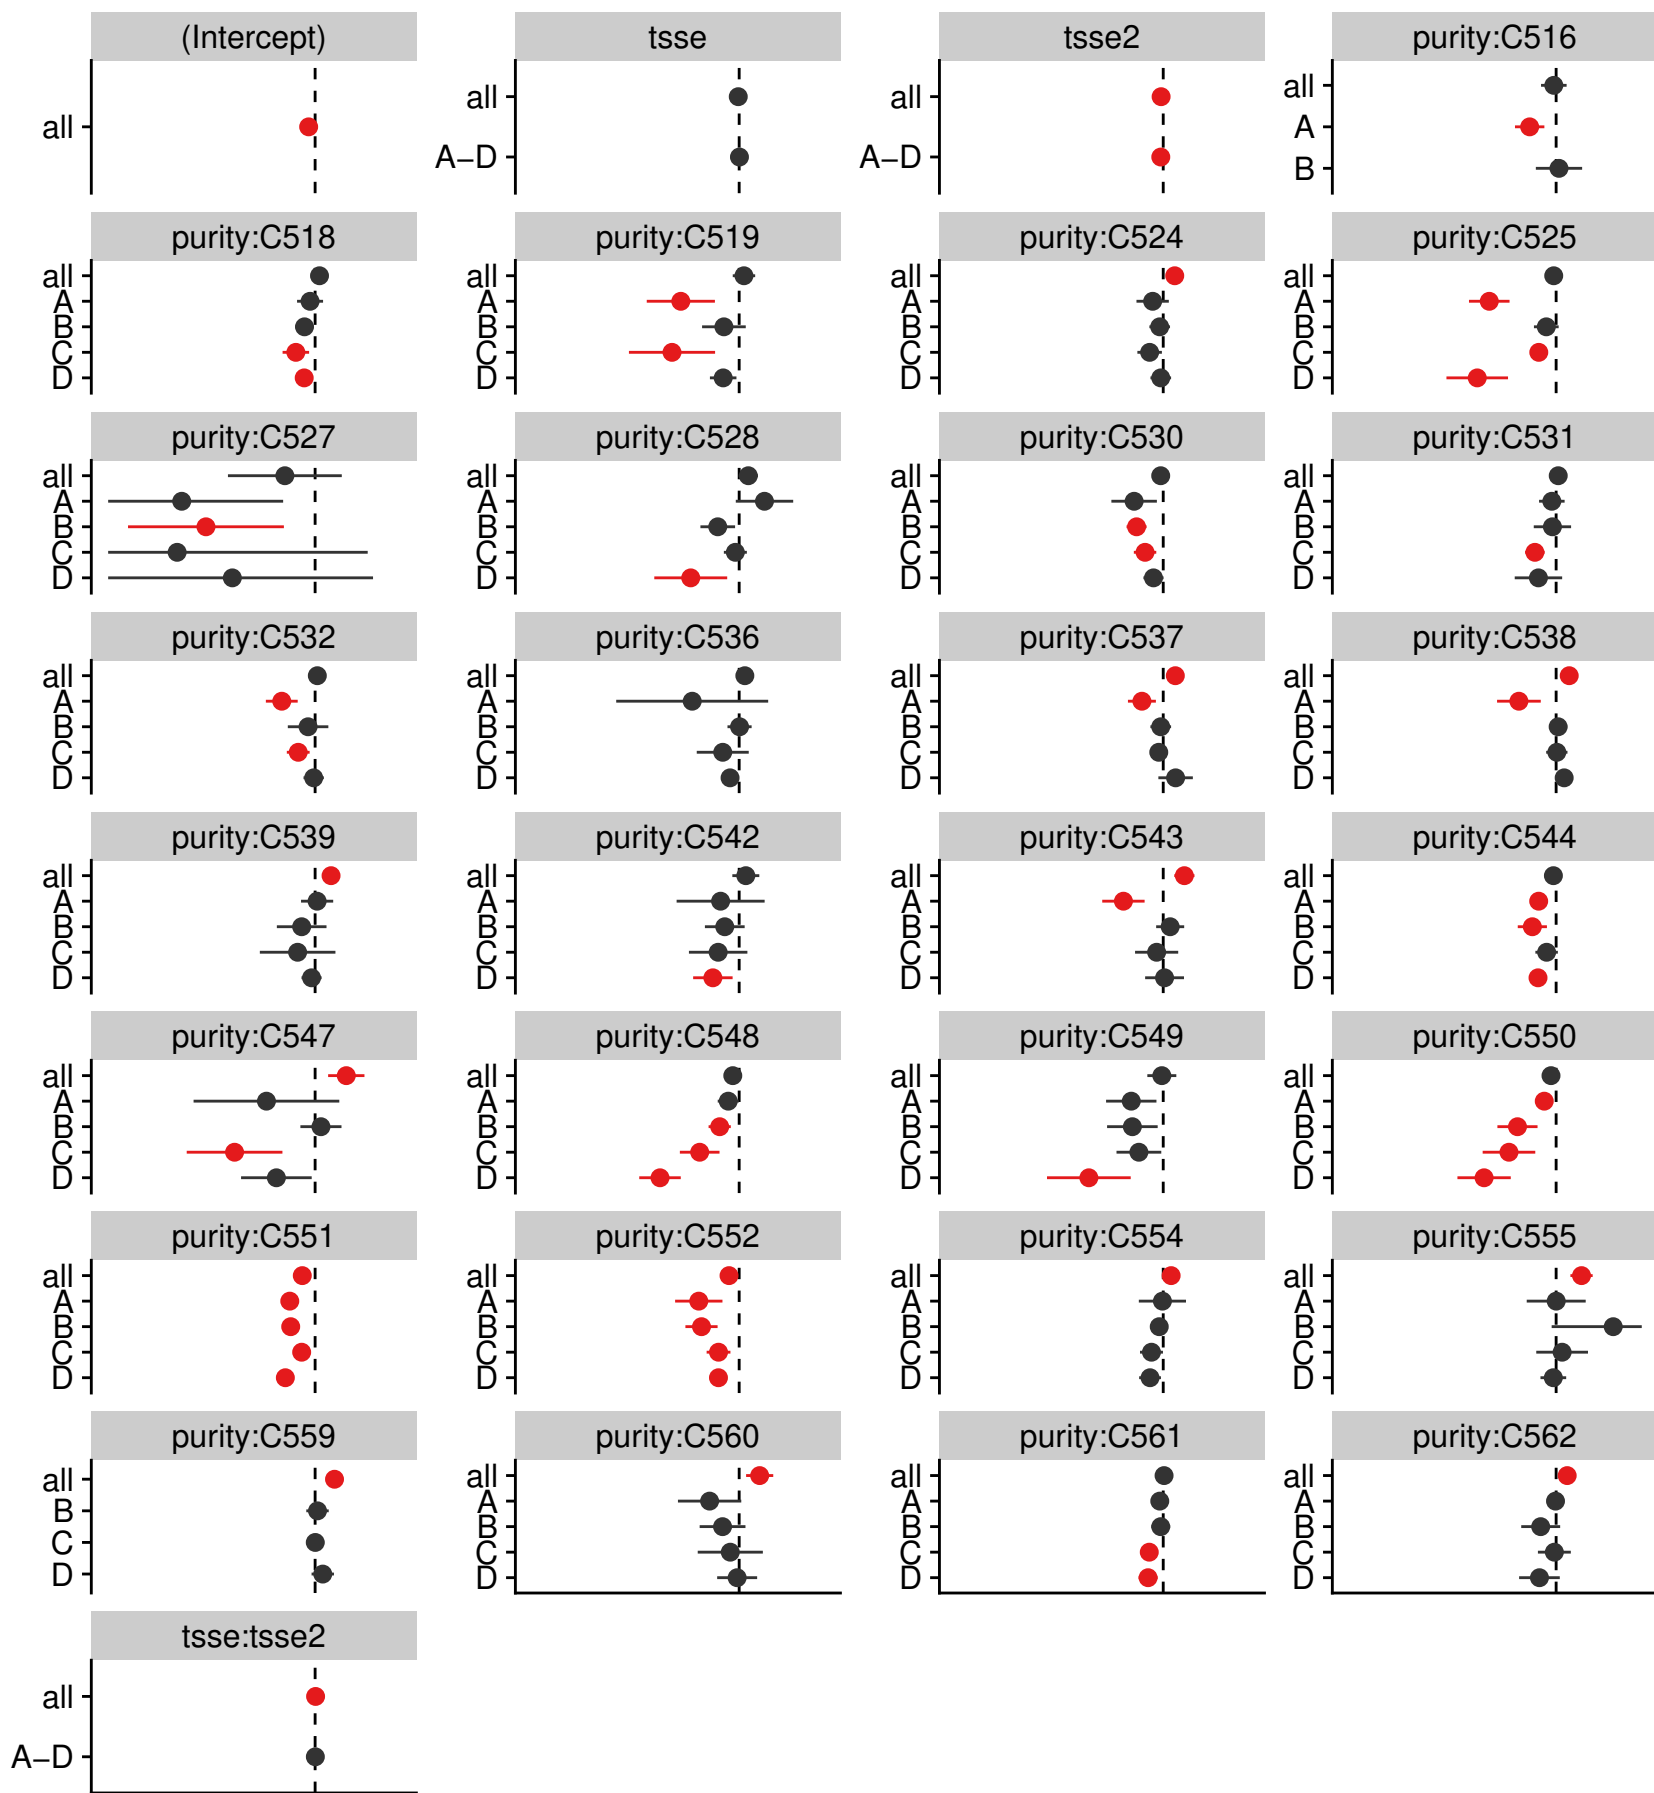

Coefficient

$p_c = < 2.22e-16$ ,  $p_{sc} = 0.019451$

# ARID3C\_uc\_dTSS\_nPEAK

+ 12/33 (2/116), - 4/33 (43/116)

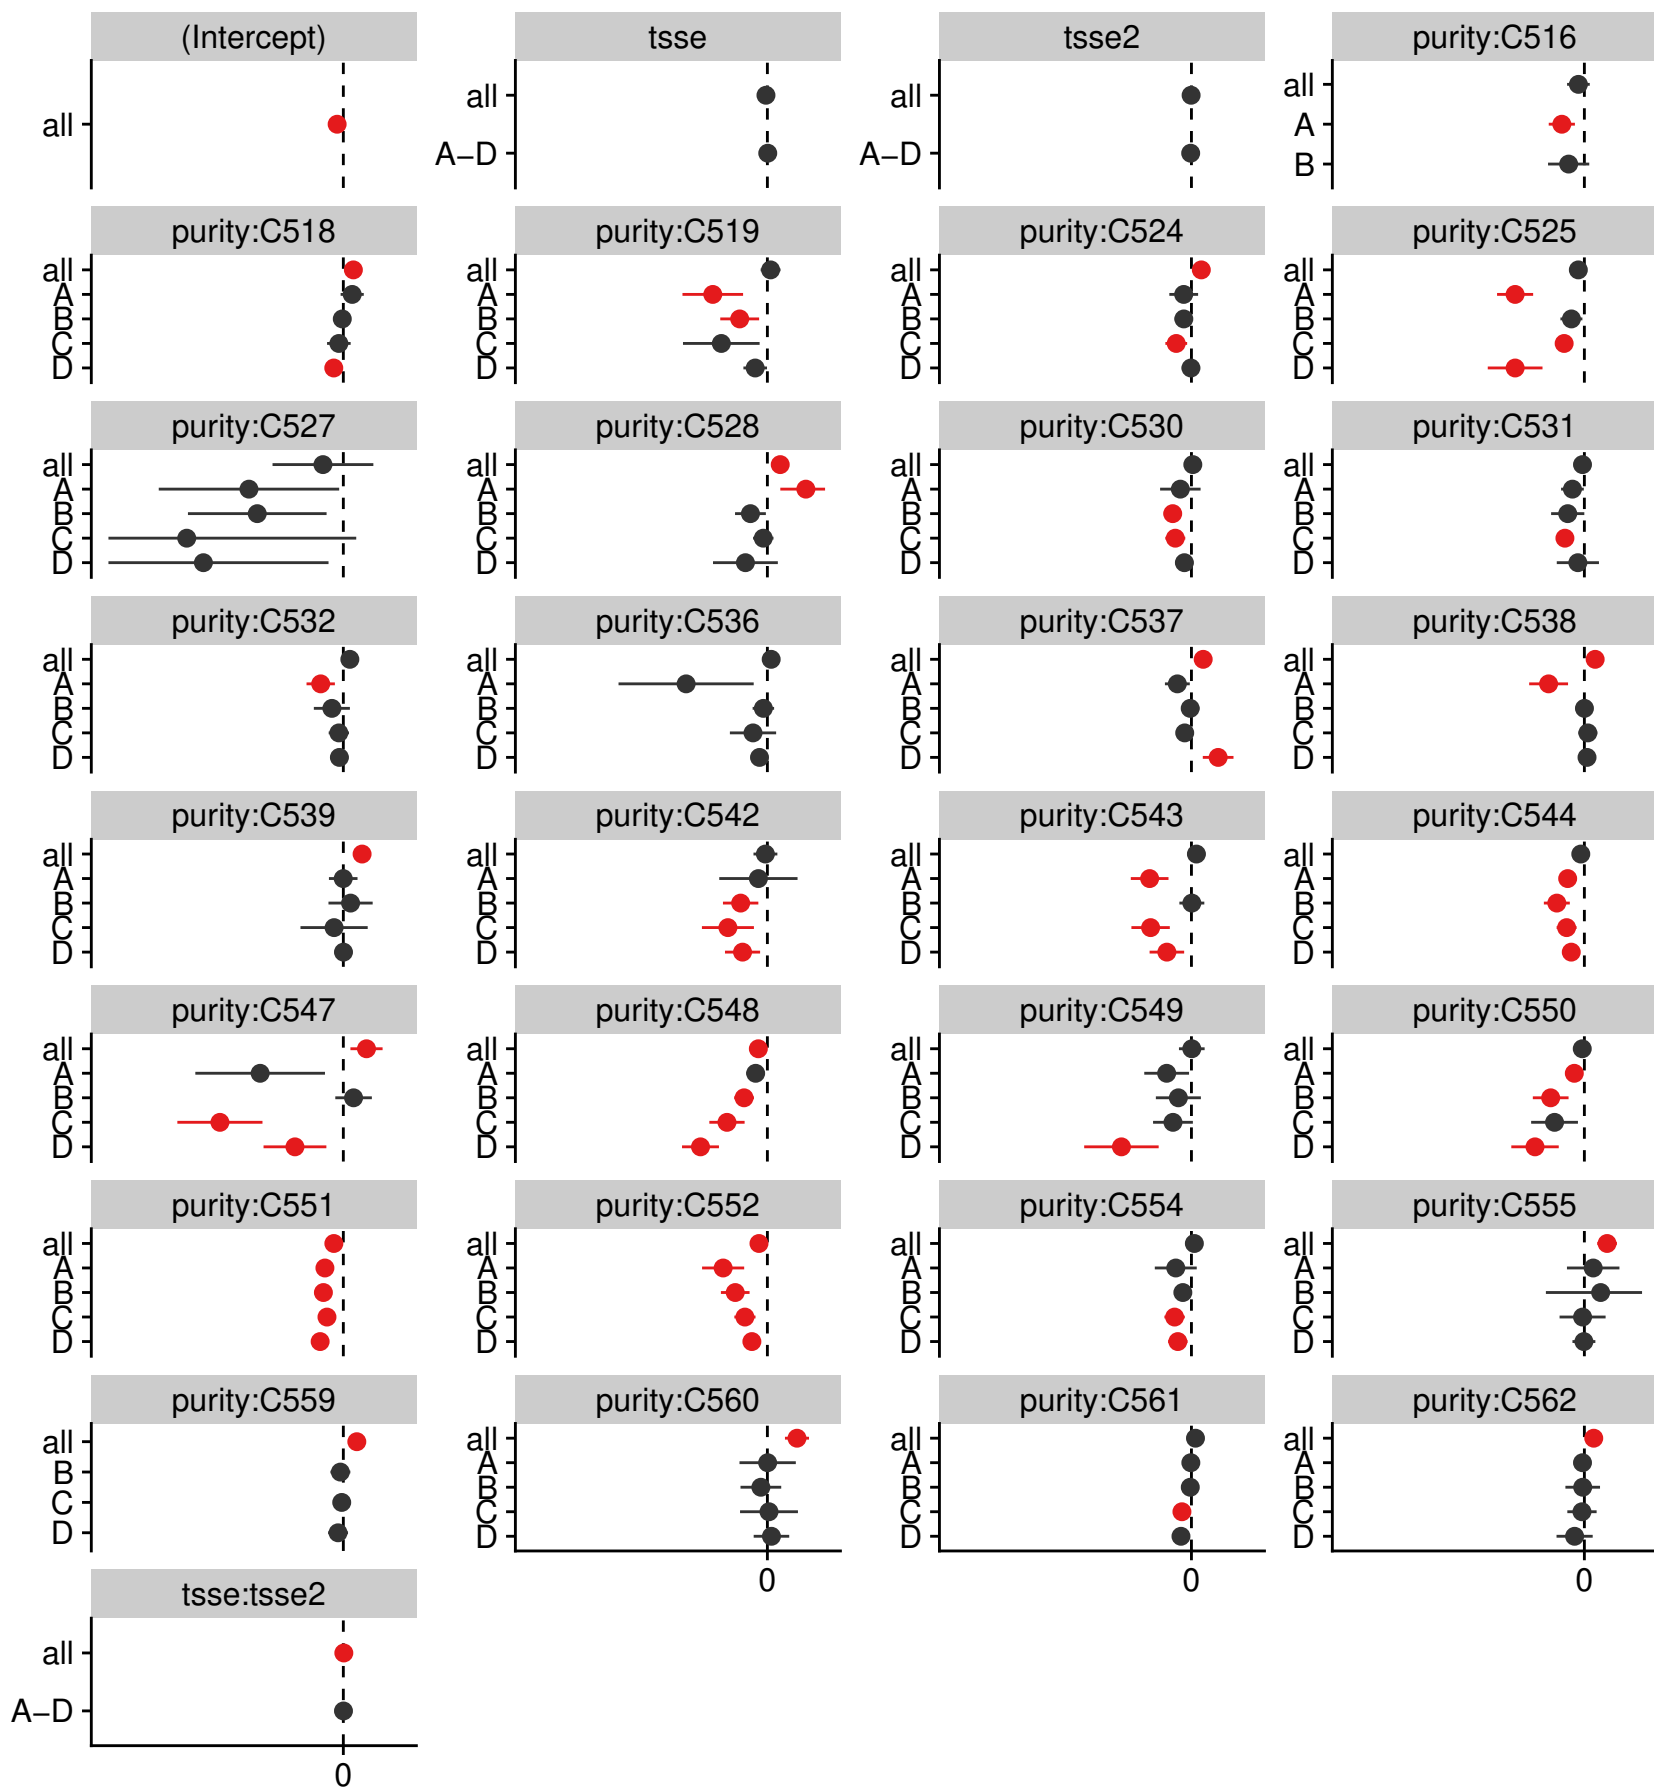

Coefficient

p\_c = < 2.22e-16, p\_sc = 0.05421

# BBX\_uc\_dTSS\_nPEAK

+ 10/33 (0/116), - 5/33 (42/116)

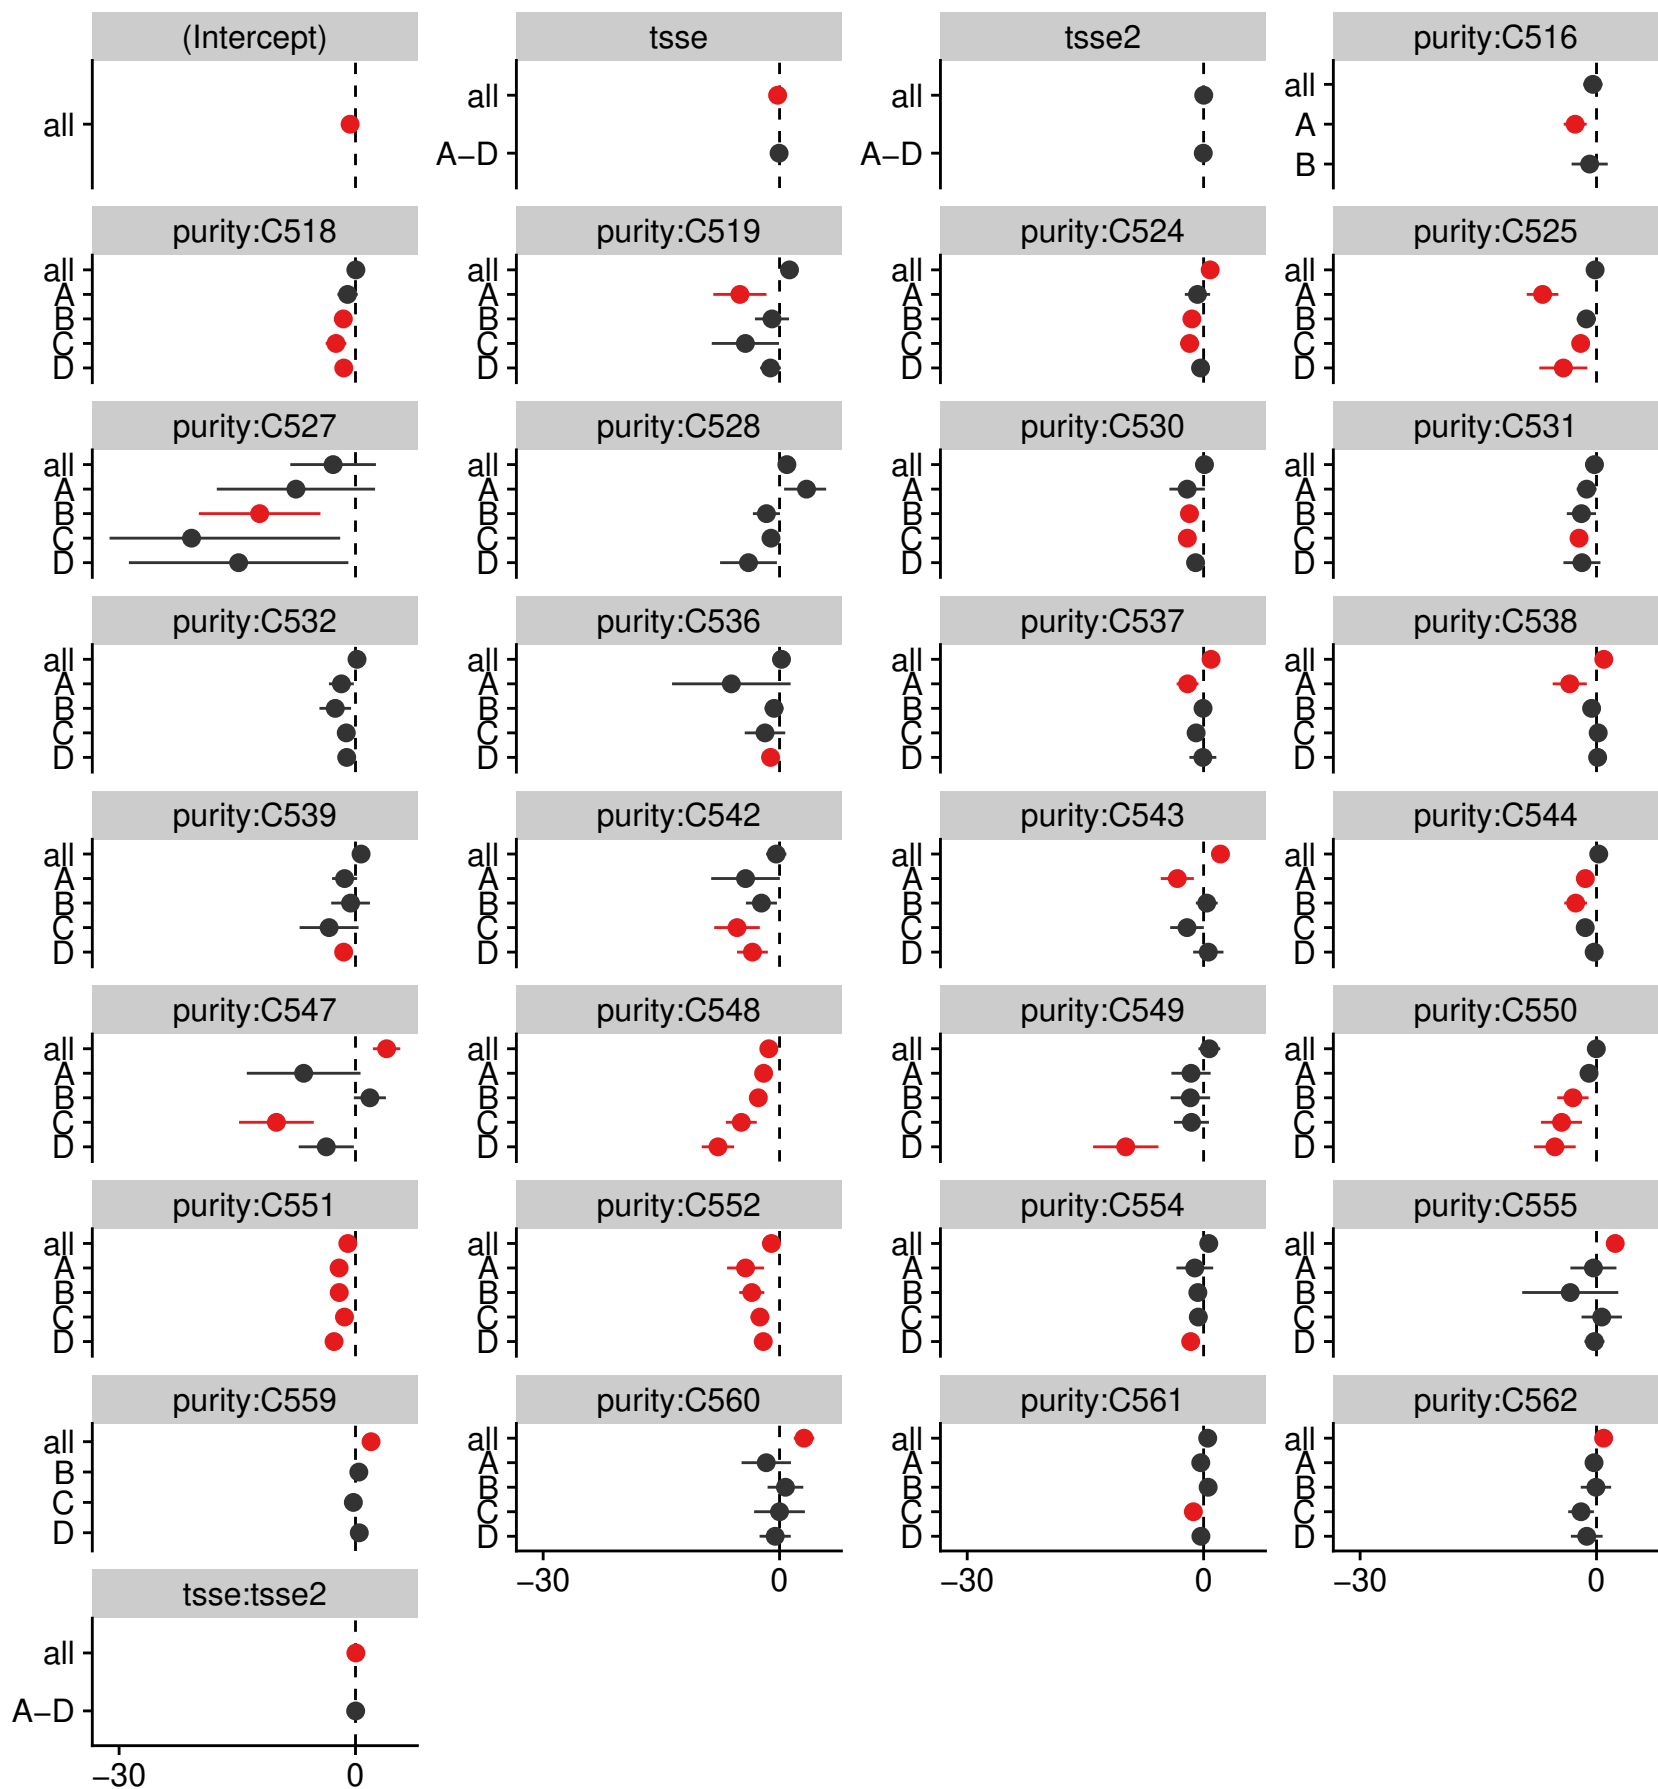

p\_c = < 2.22e-16, p\_sc = 0.99425

# BCL11A\_uc\_cTSS\_nPEAK

+ 2/33 (5/116), - 17/33 (38/116)

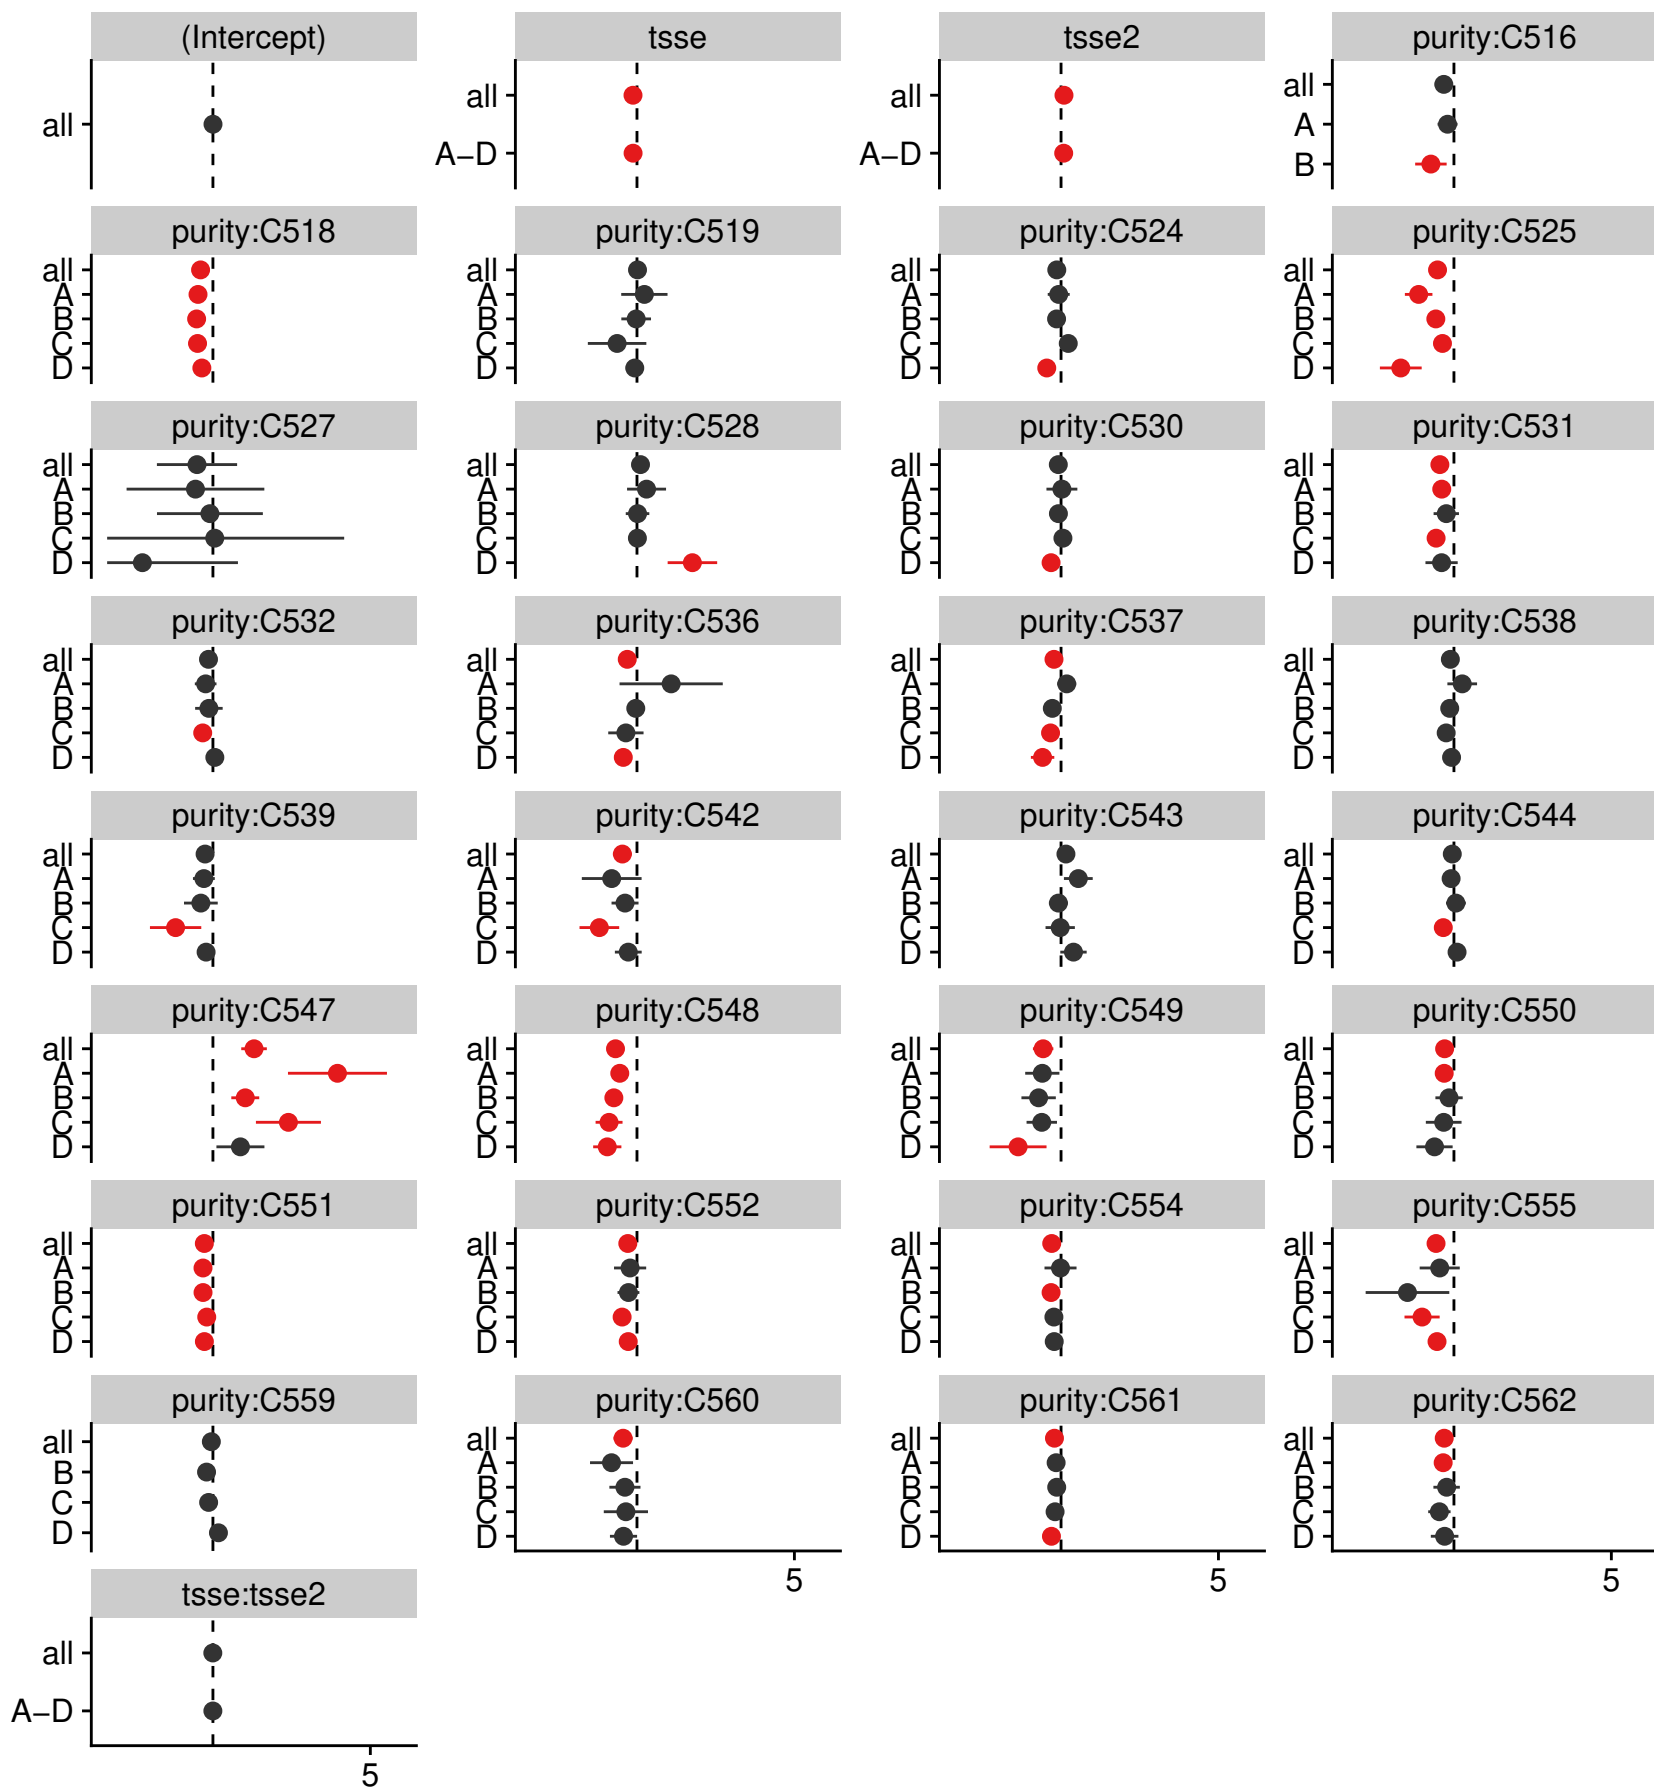

Coefficient

p\_c = < 2.22e-16, p\_sc = 6.5157e-08

# BCL11A\_uc\_cTSS\_oPEAK

+ 3/33 (9/116), - 23/33 (40/116)

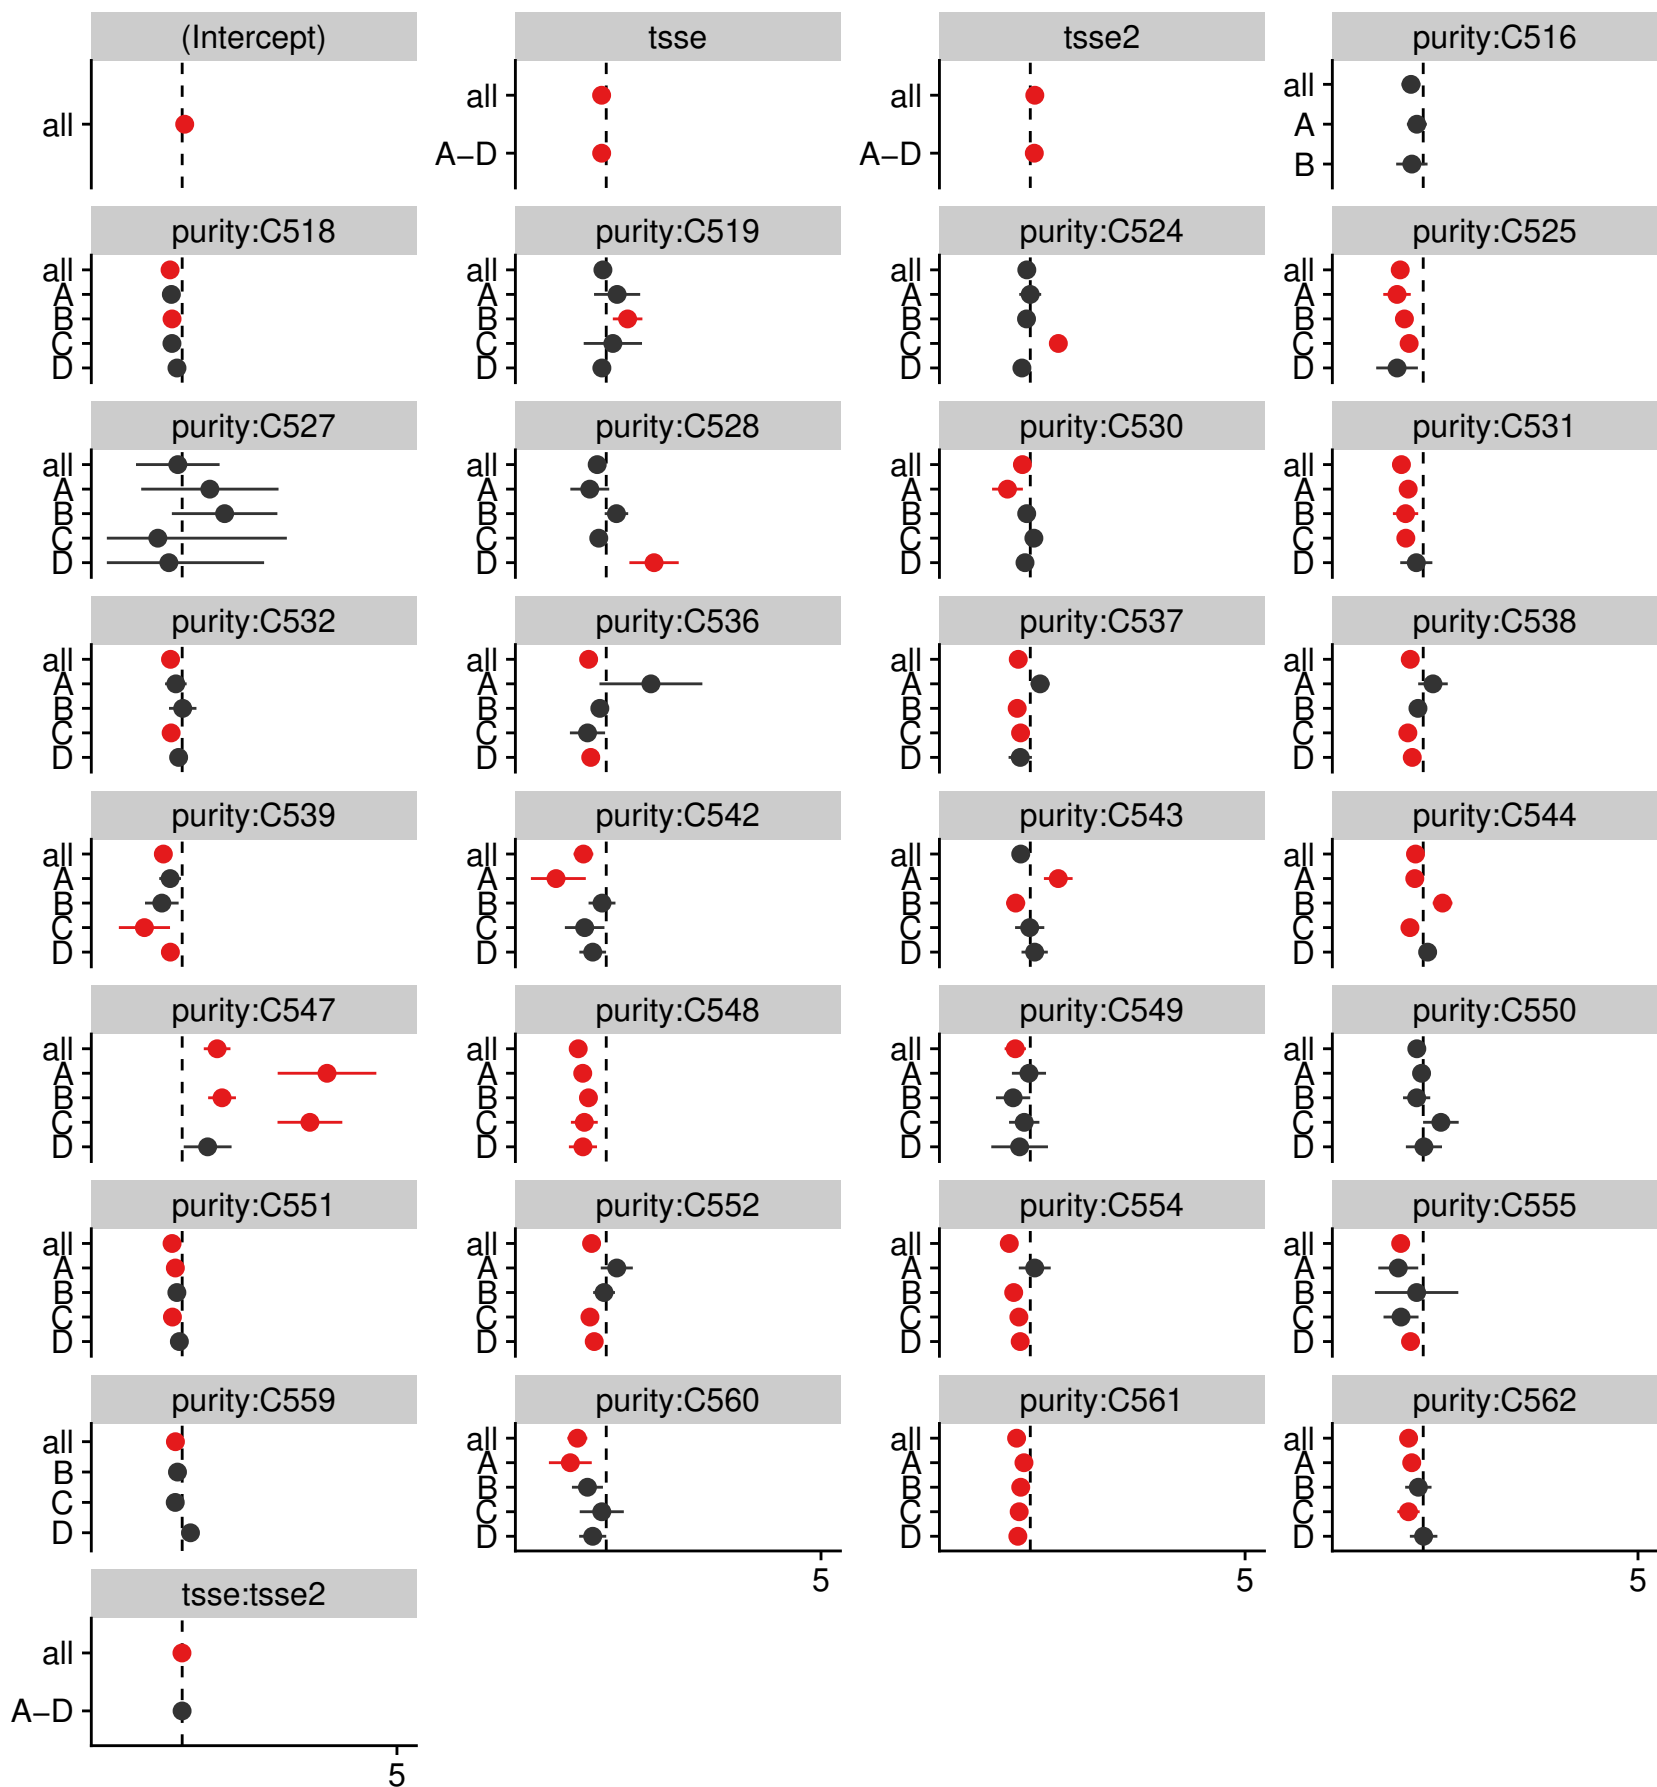

Coefficient

p\_c = < 2.22e-16, p\_sc = < 2.22e-16

# BCL11A\_uc\_dTSS\_nPEAK

+ 2/33 (5/116), - 21/33 (53/116)

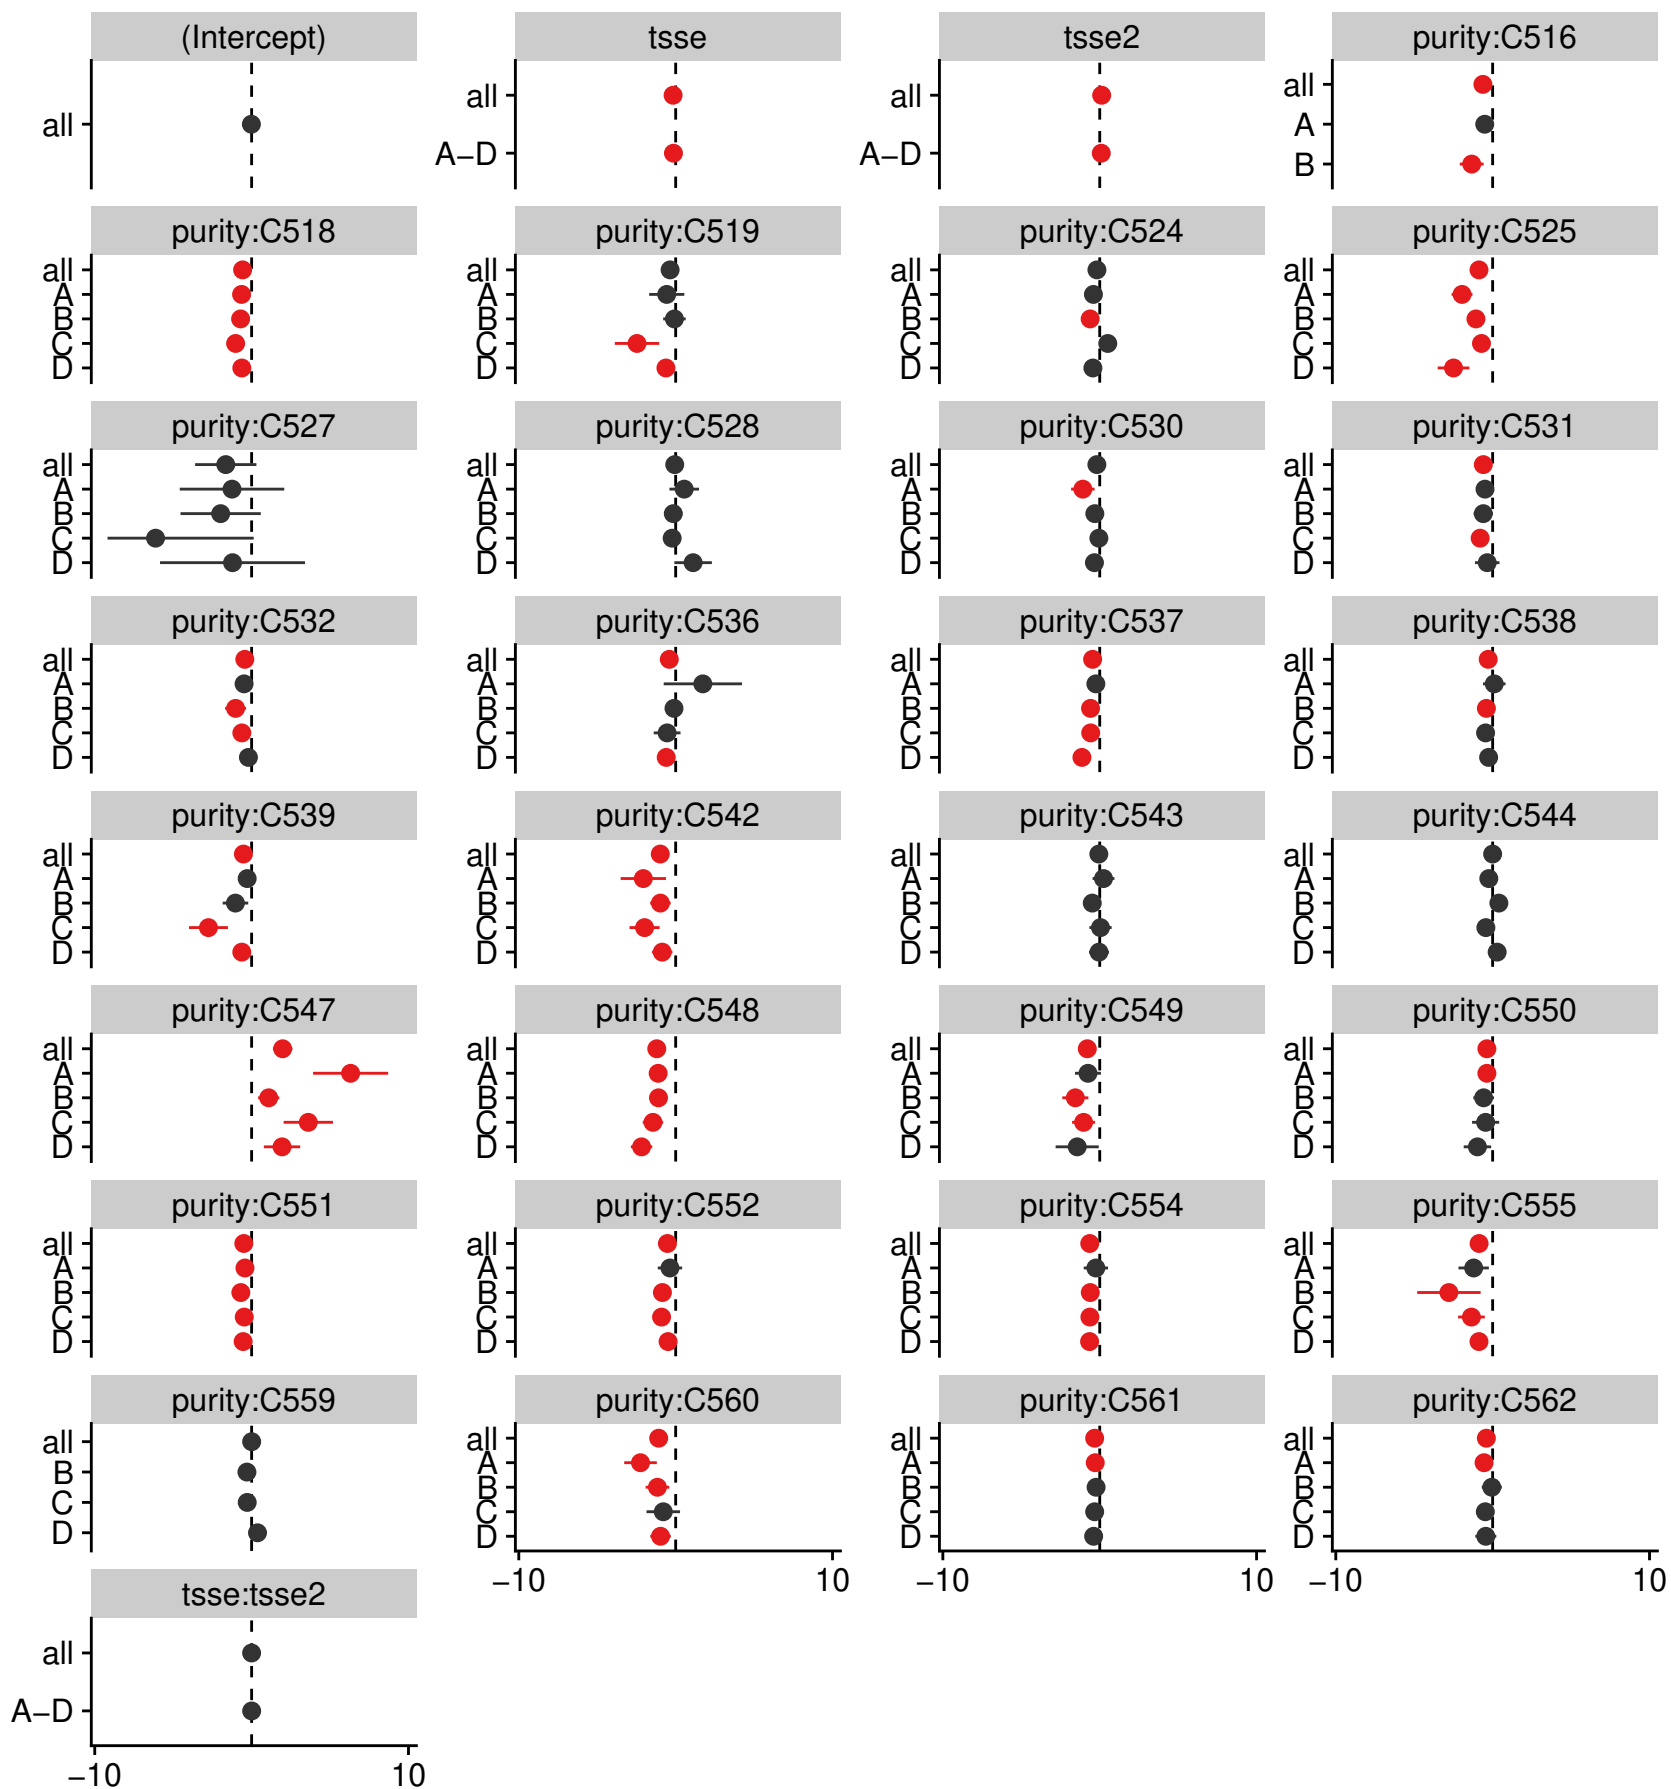

p\_c = < 2.22e-16, p\_sc = 2.3481e-09

$+ 3/33 \text{ (8/116)}, - 23/33 \text{ (54/116)}$ 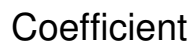
$$p_c = < 2.22e-16, p_{sc} = < 2.22e-16$$



# BCL11A\_uc\_pTSS\_nPEAK

+ 2/33 (4/116), - 19/33 (29/116)

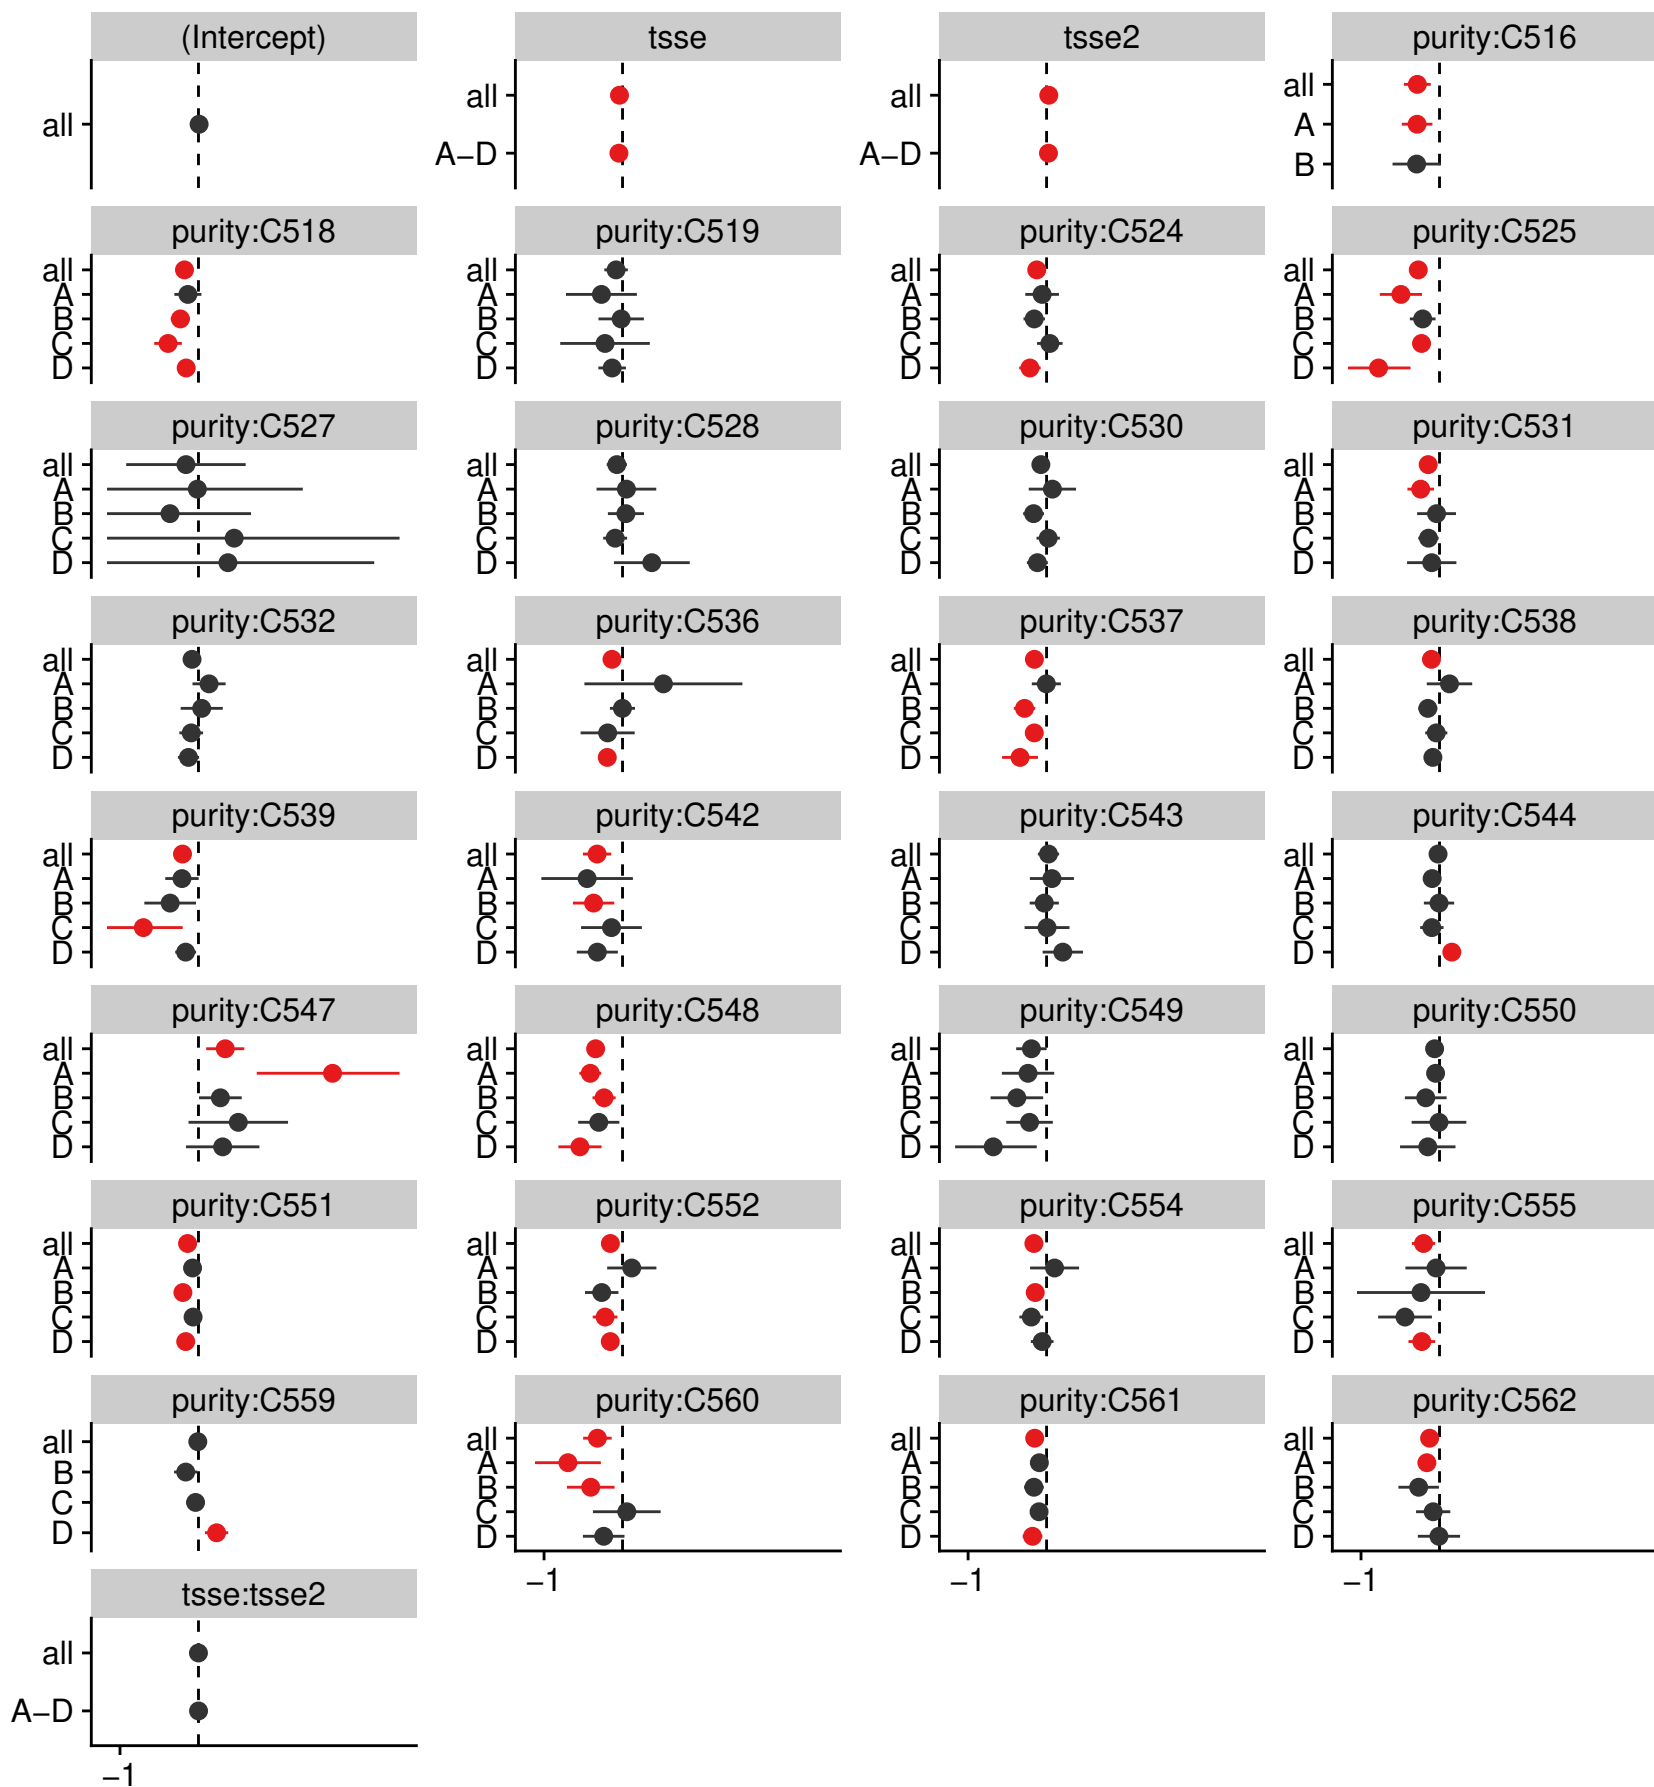

p\_c = < 2.22e-16, p\_sc = 0.0013966

# BCL11A\_uc\_pTSS\_oPEAK

+ 3/33 (10/116), - 25/33 (41/116)

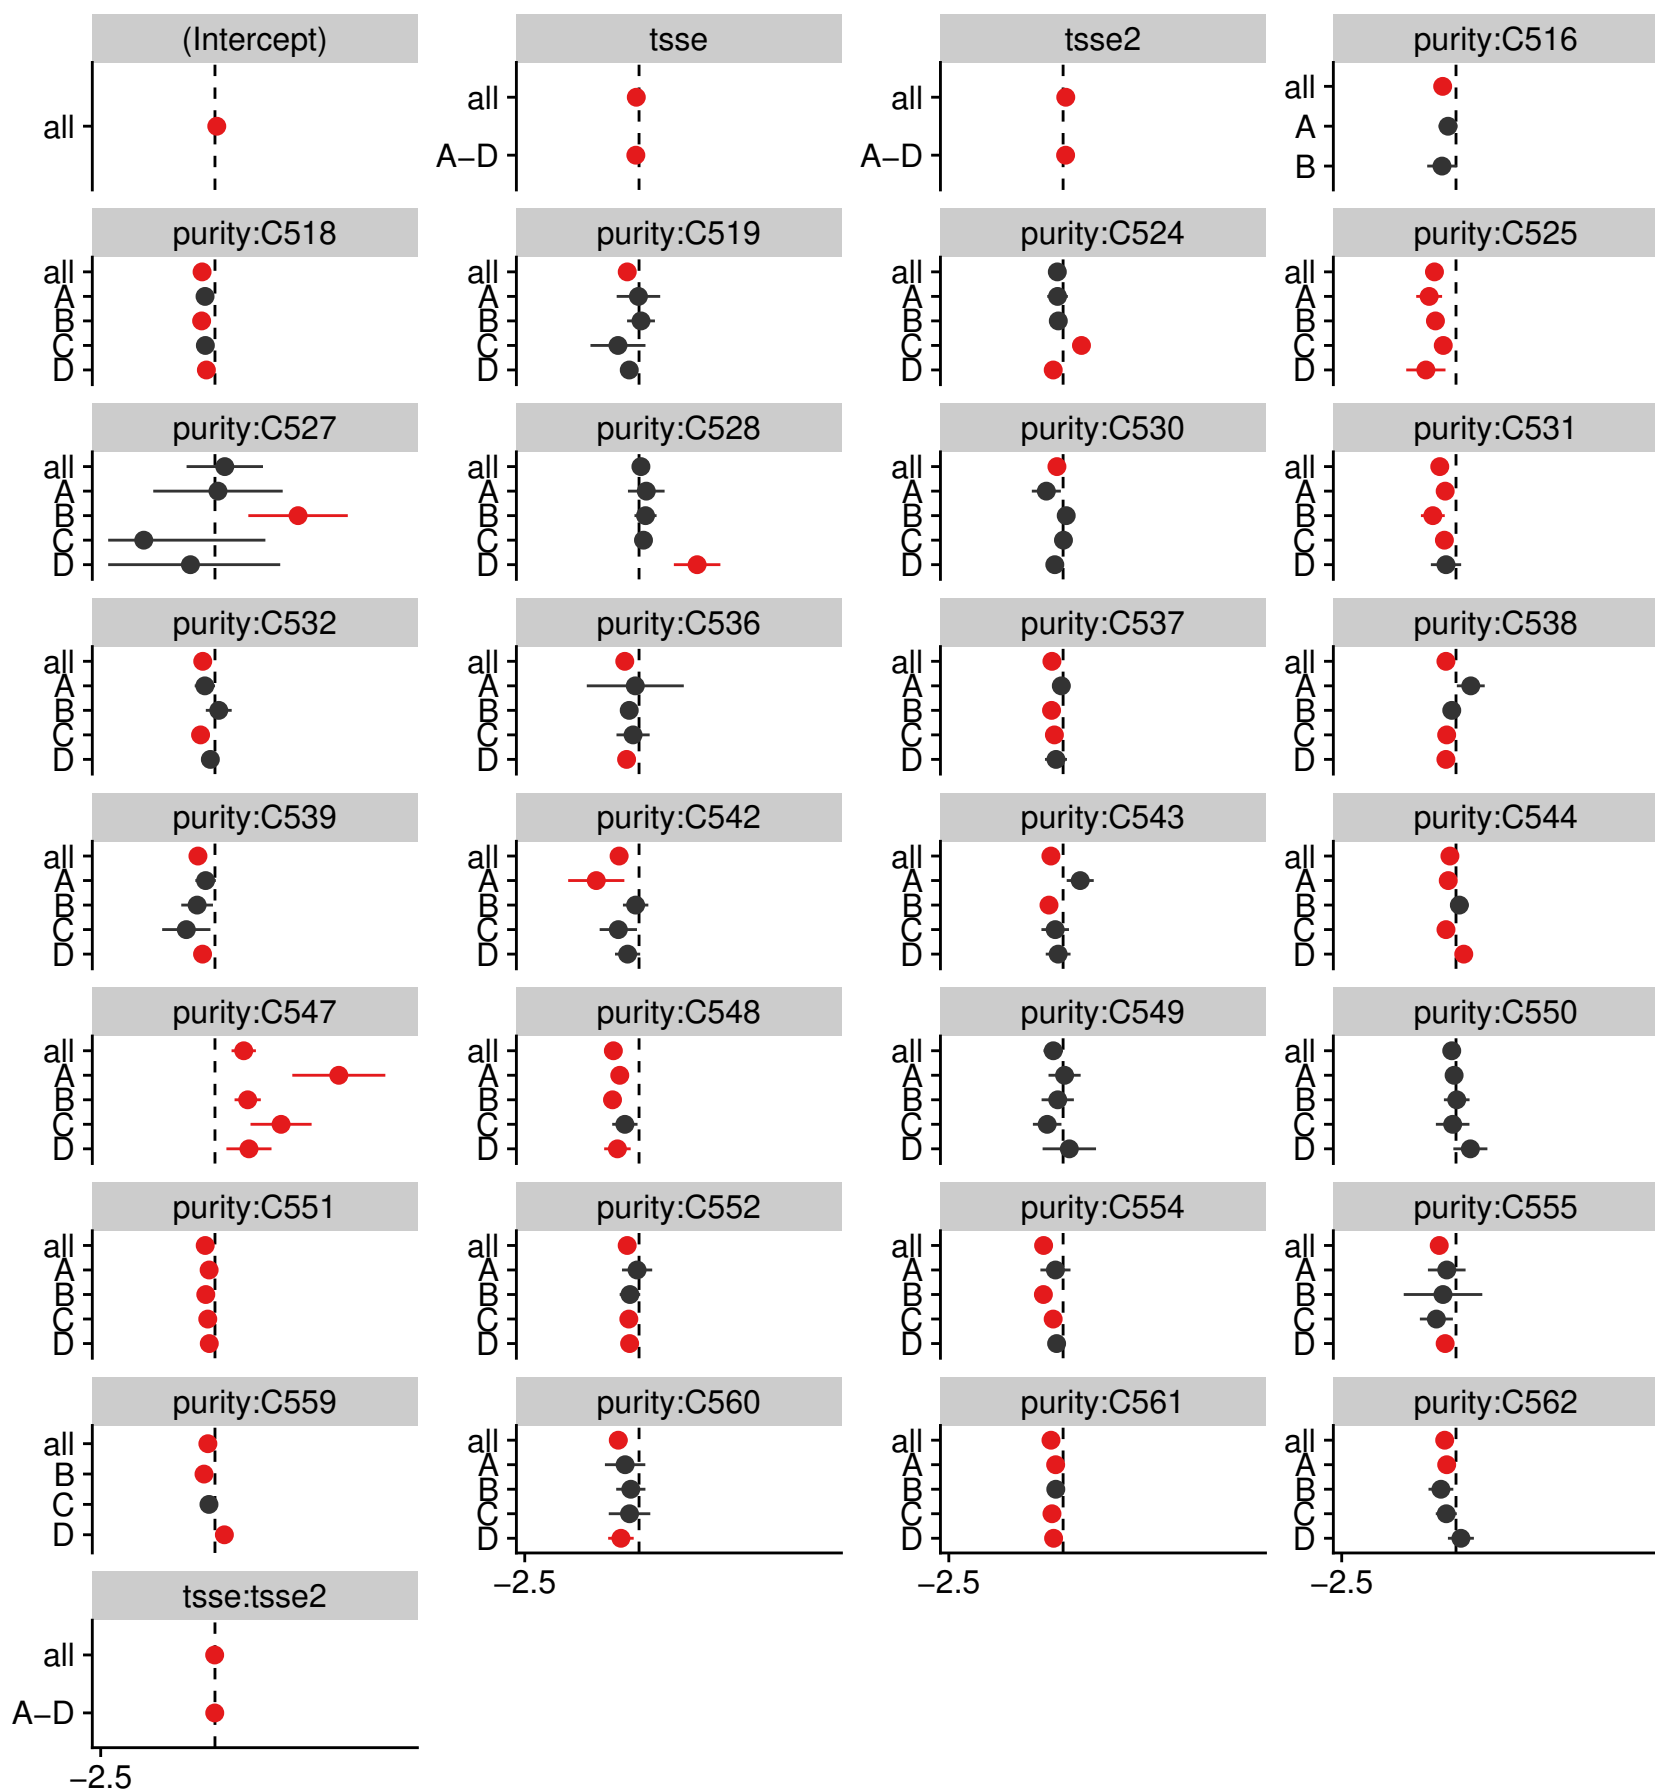

Coefficient

p\_c = < 2.22e-16, p\_sc = 1.3982e-10

# BCL11B\_uc\_cTSS\_nPEAK

+ 2/33 (5/116), - 17/33 (38/116)



Coefficient

p\_c = < 2.22e-16, p\_sc = 6.5157e-08

# BCL11B\_uc\_cTSS\_oPEAK

+ 3/33 (9/116), - 23/33 (40/116)

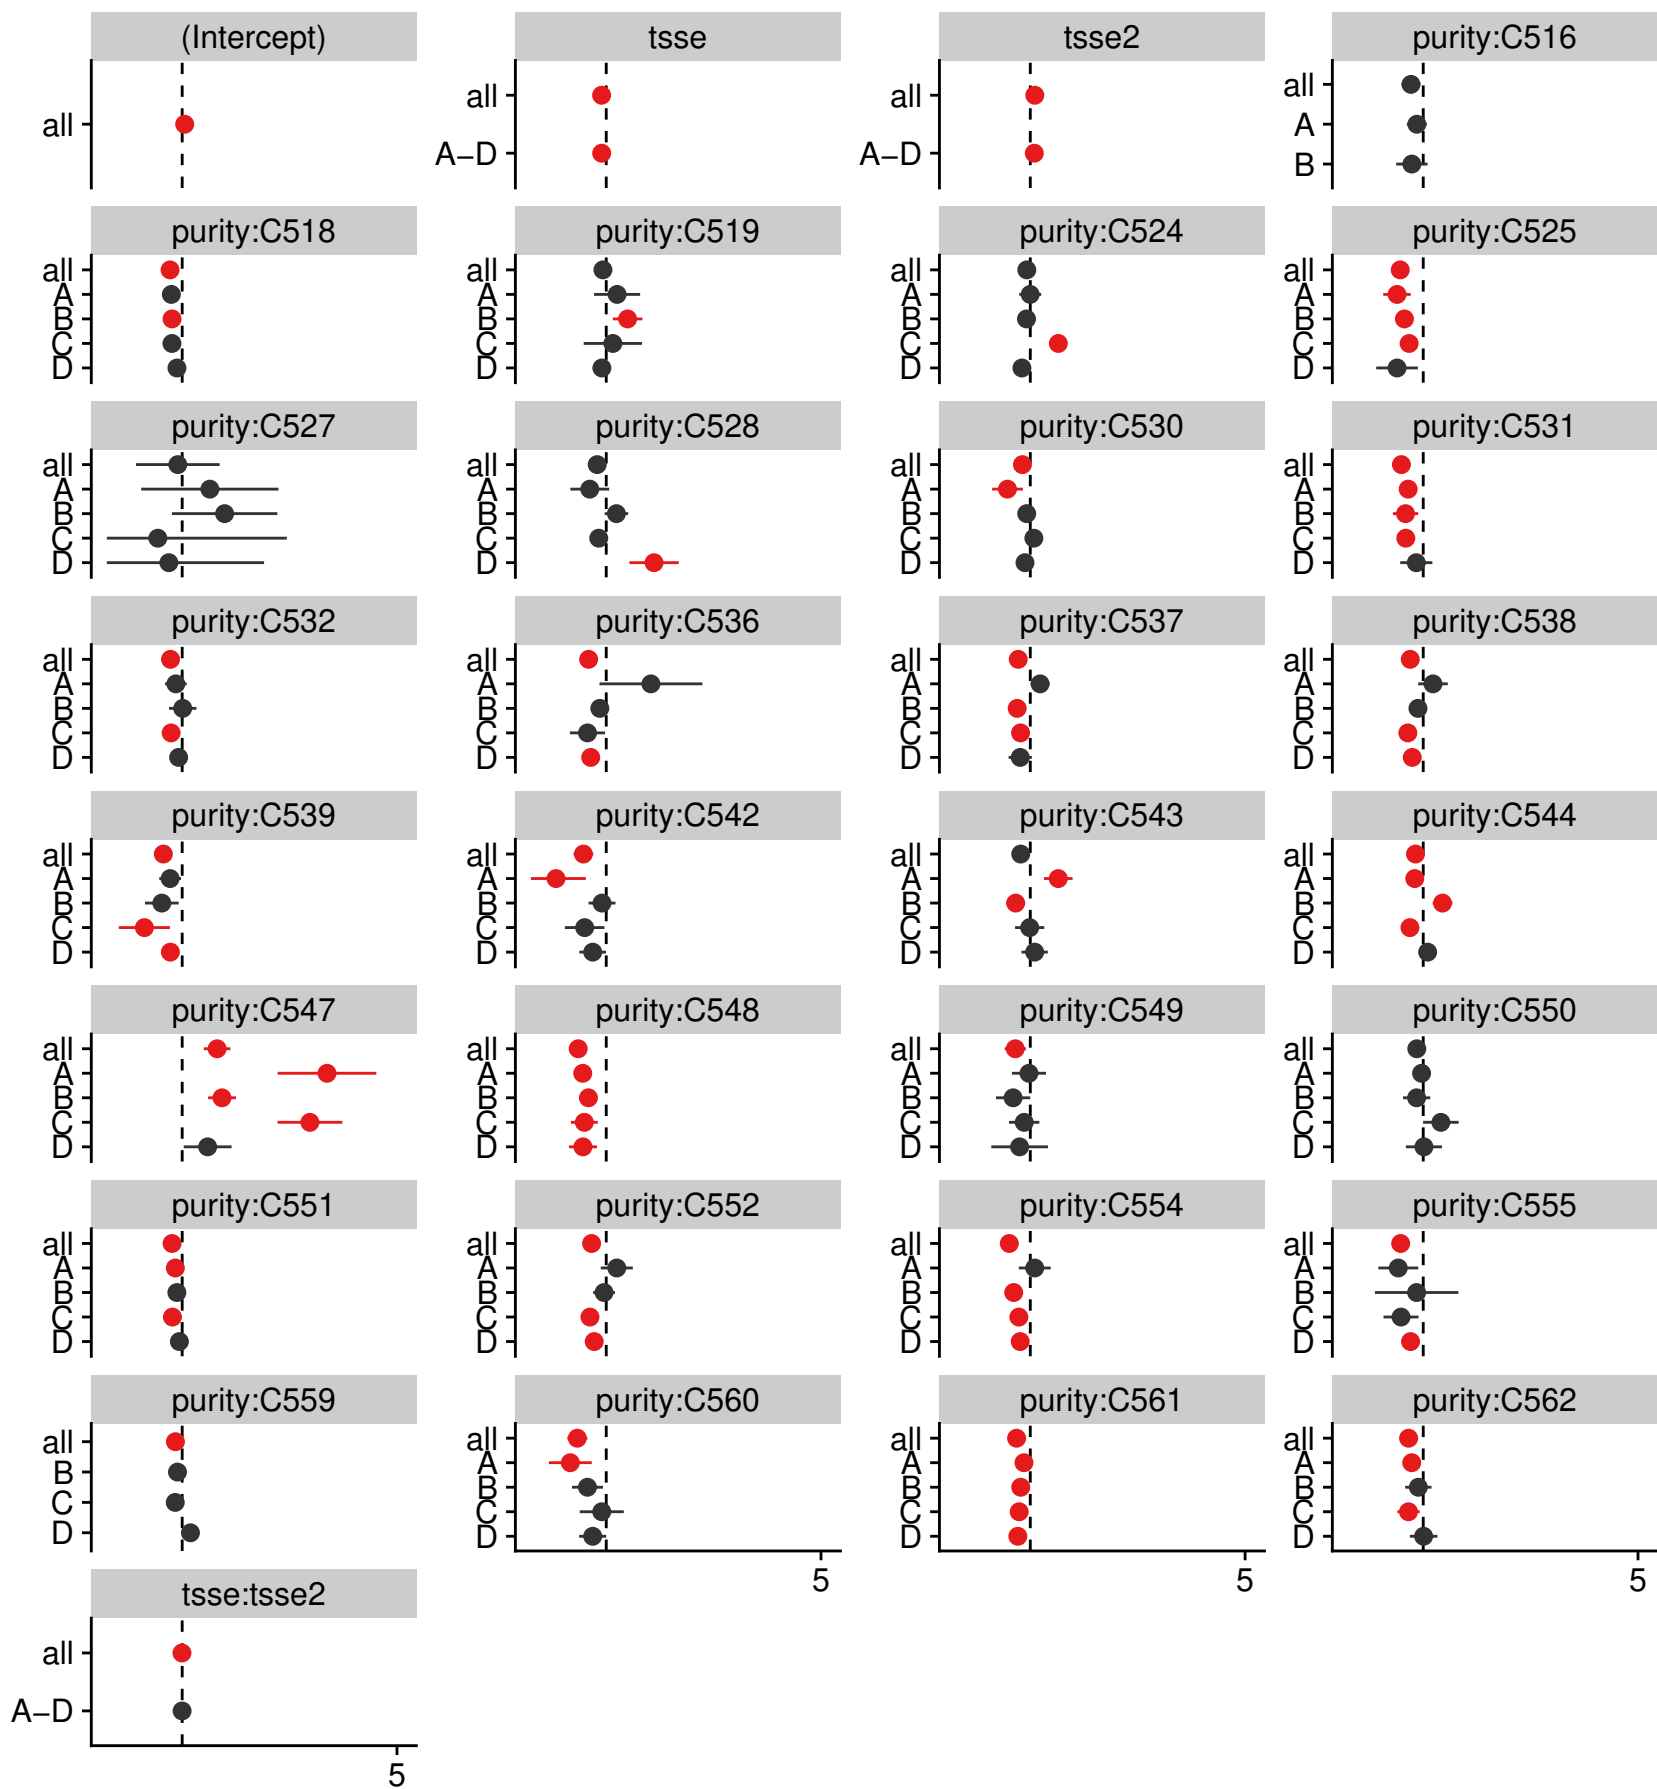

Coefficient

p\_c = < 2.22e-16, p\_sc = < 2.22e-16

# BCL11B\_uc\_dTSS\_nPEAK

+ 2/33 (5/116), - 21/33 (53/116)

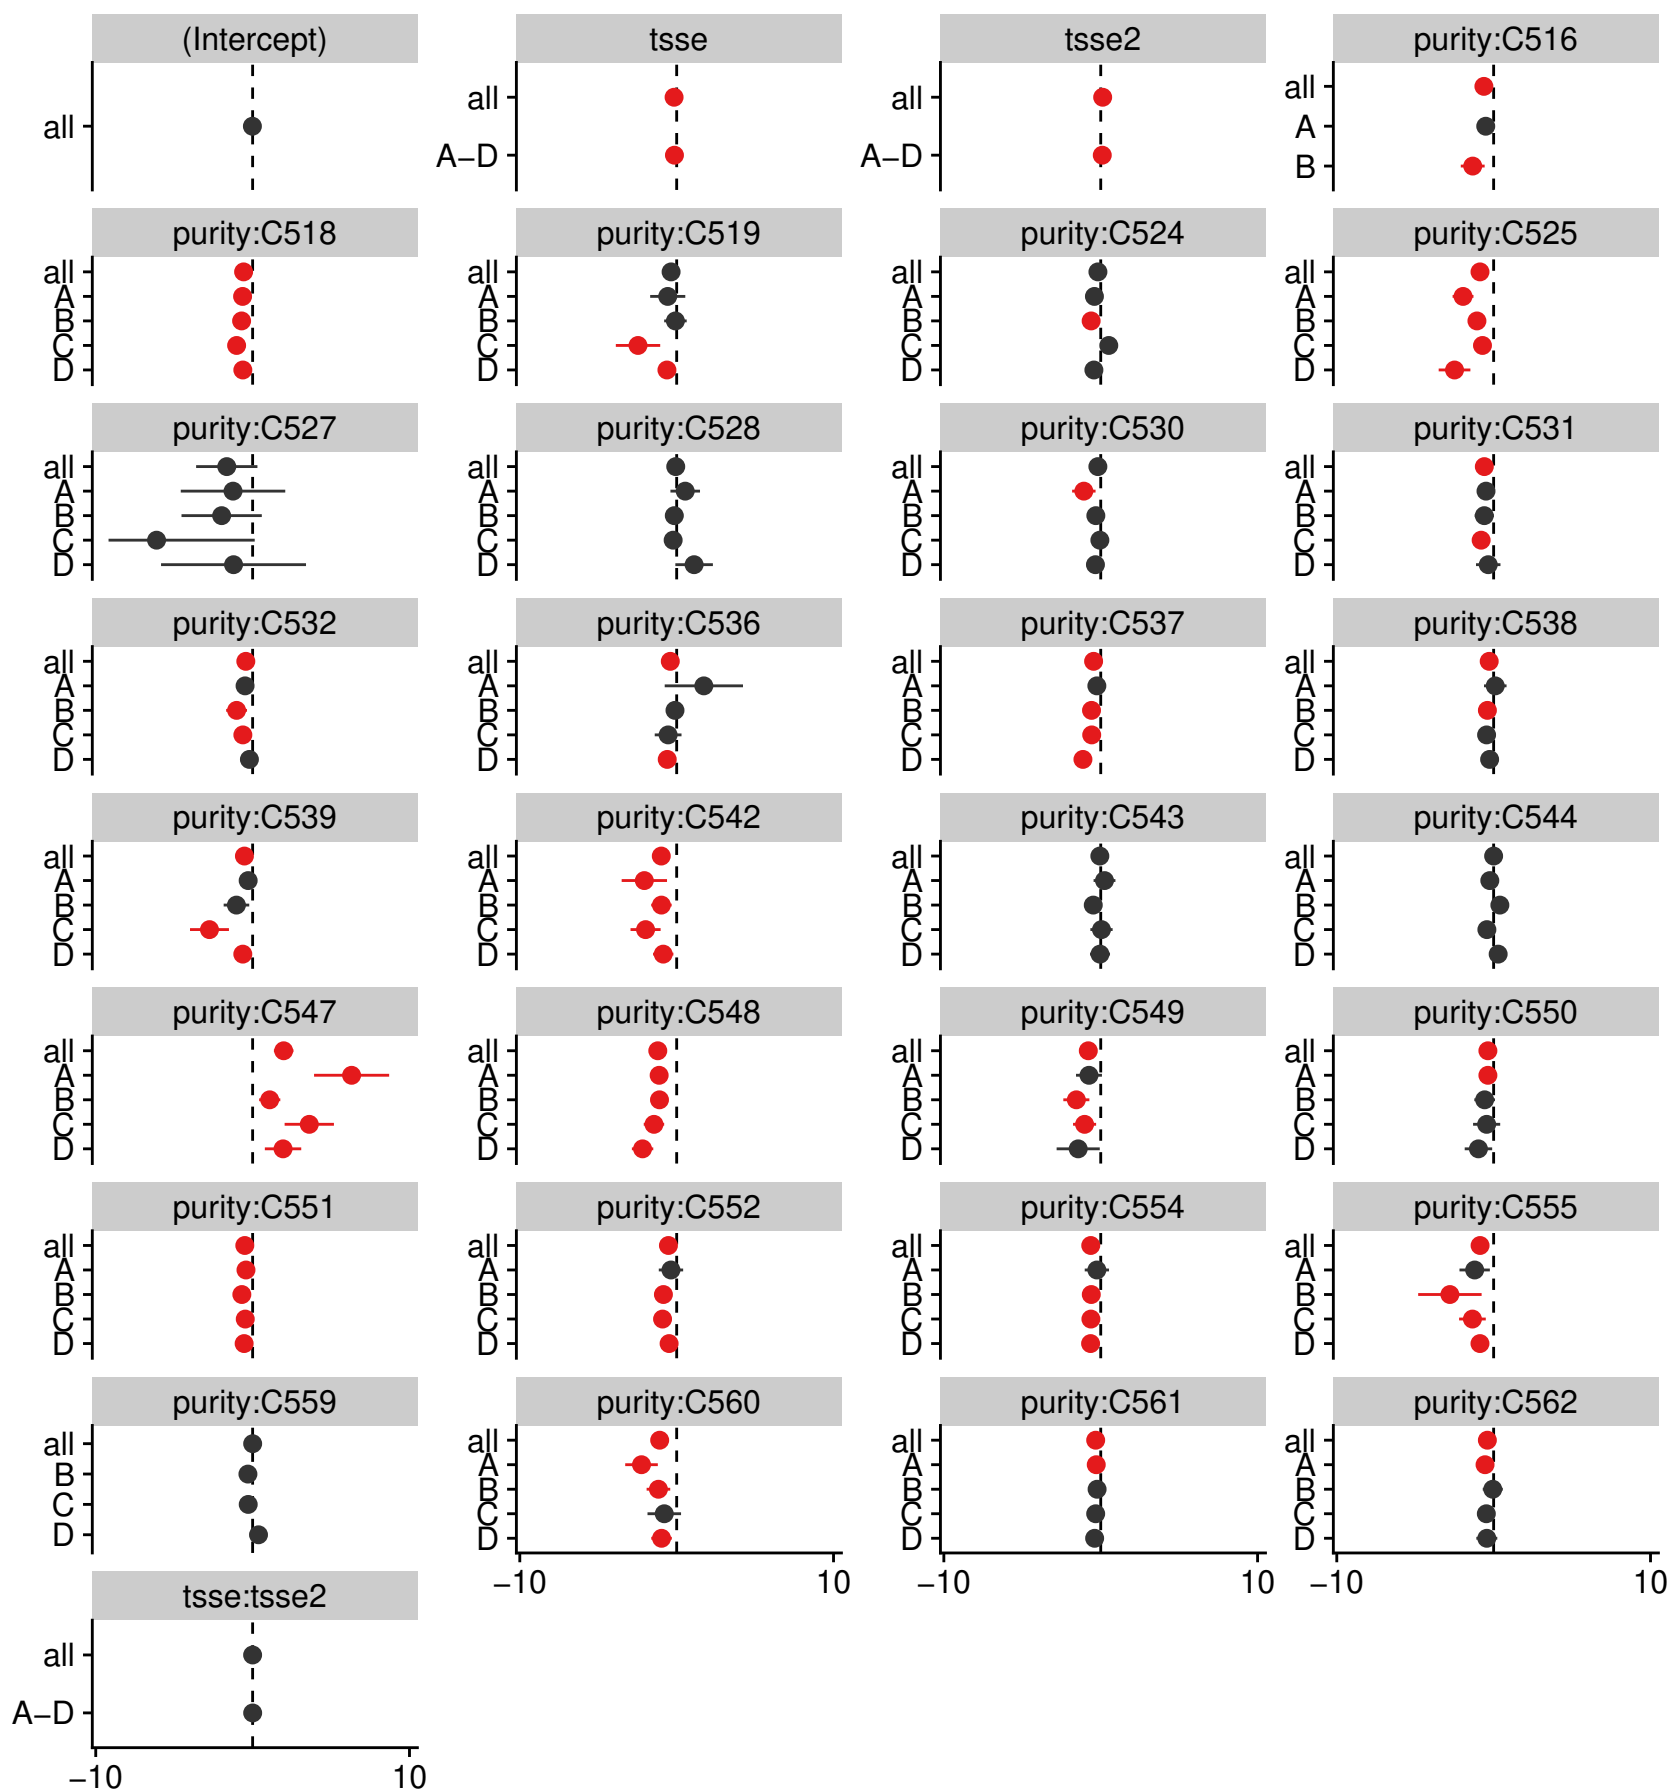

Coefficient

p\_c = < 2.22e-16, p\_sc = 2.3481e-09

# BCL11B\_uc\_dTSS\_oPEAK

+ 3/33 (8/116), - 23/33 (54/116)

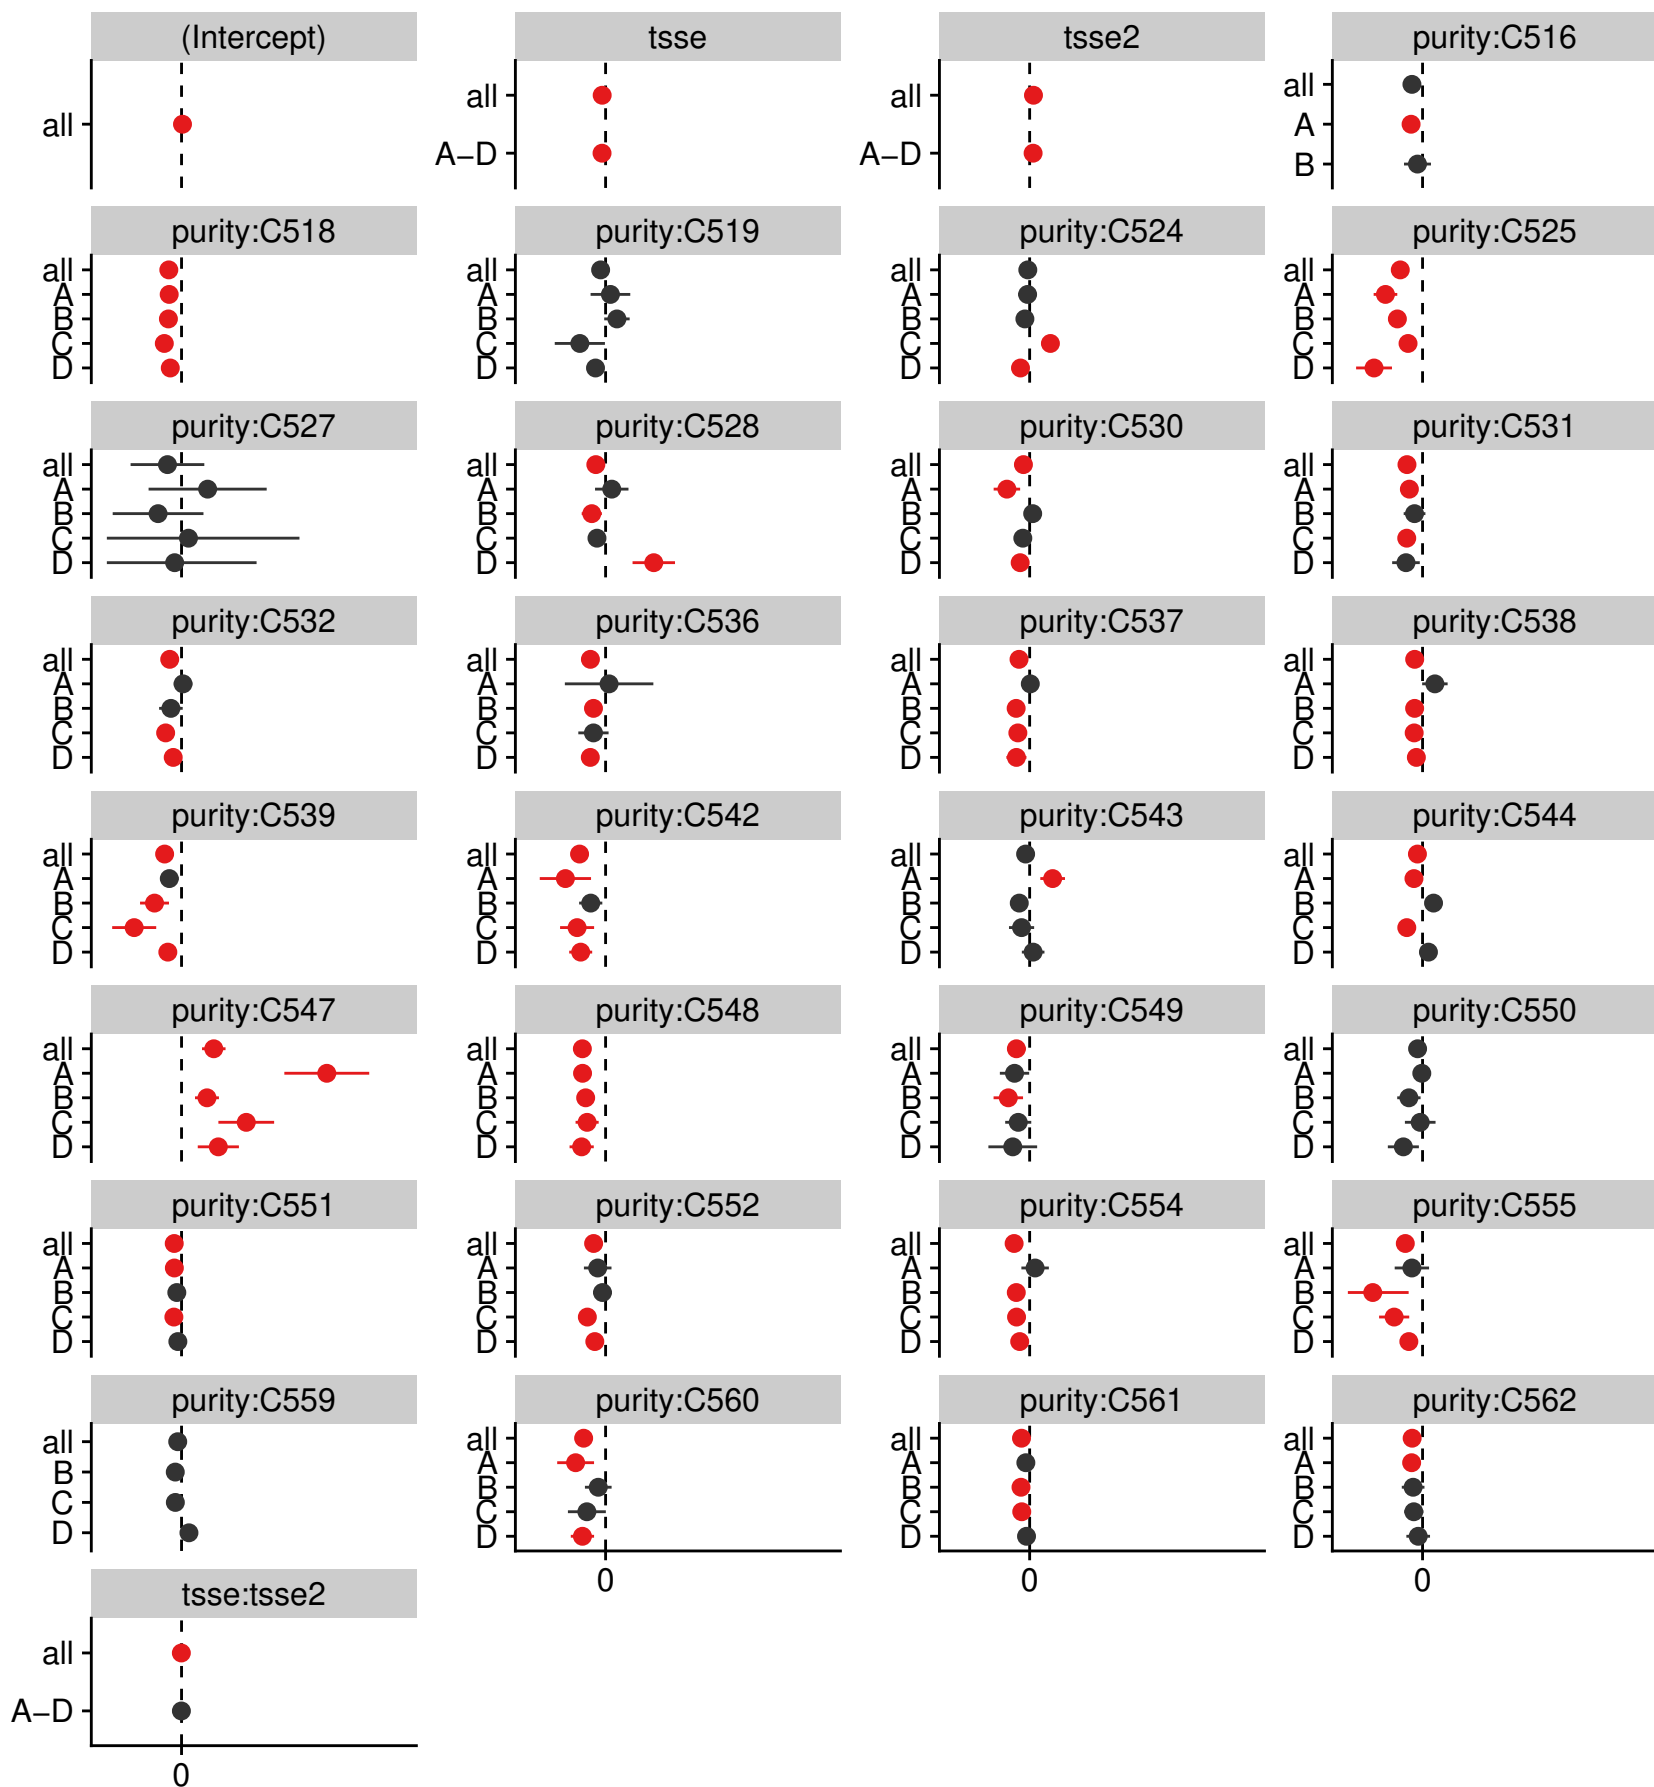

Coefficient

p\_c = < 2.22e-16, p\_sc = < 2.22e-16

# BCL11B\_uc\_pTSS\_nPEAK

+ 2/33 (4/116), - 19/33 (29/116)

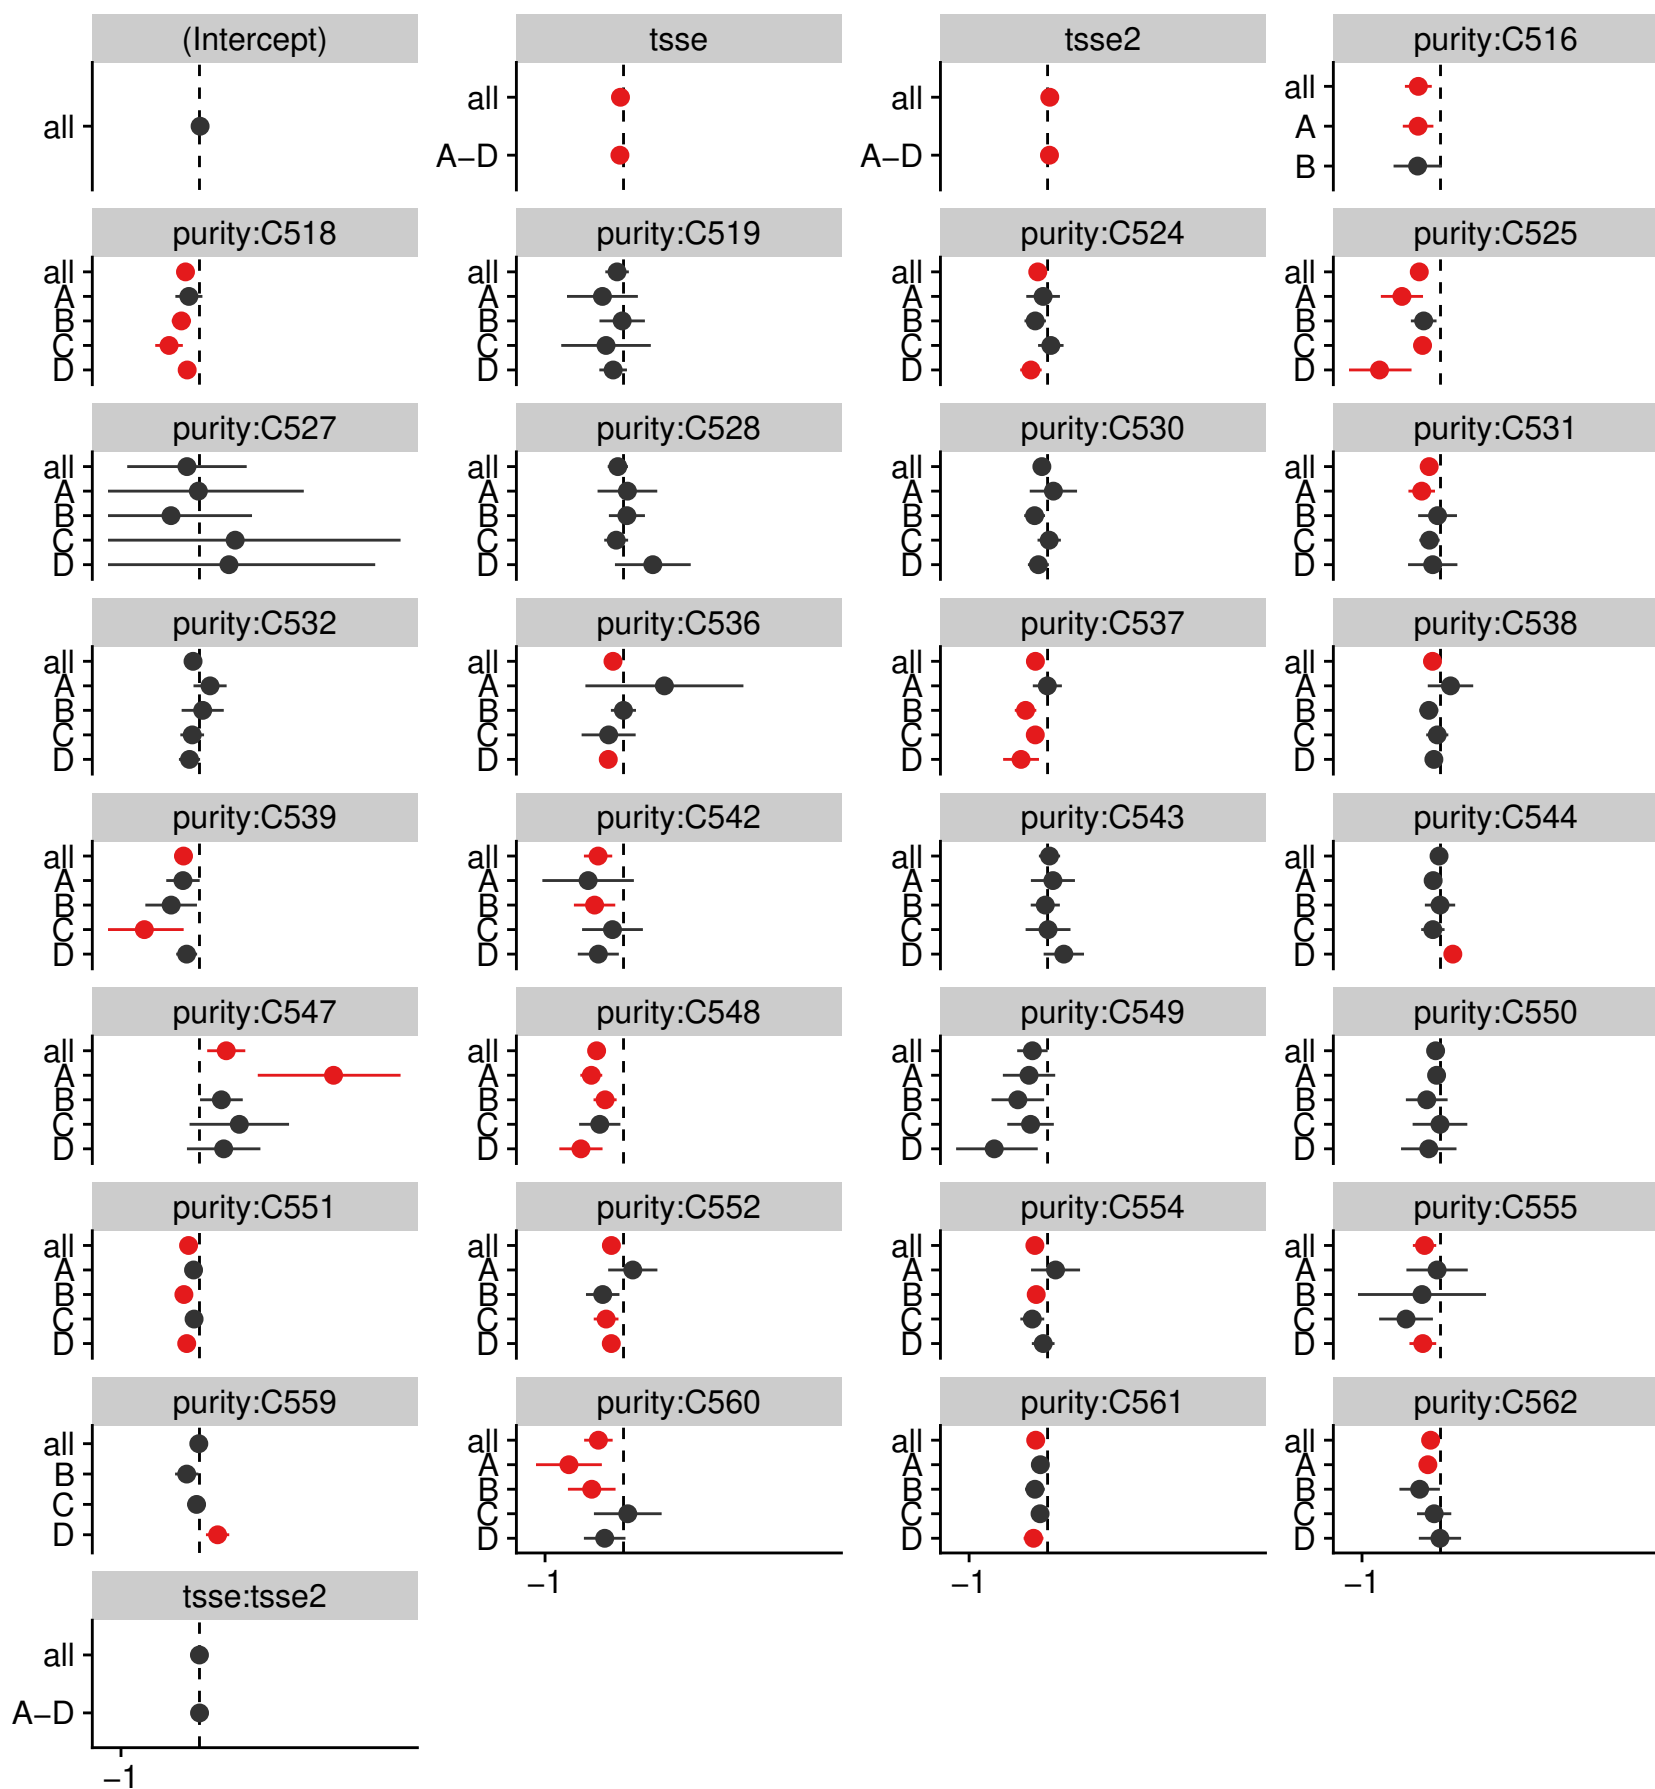

Coefficient

p\_c = < 2.22e-16, p\_sc = 0.0013966

# BCL11B\_uc\_pTSS\_oPEAK

+ 3/33 (10/116), - 25/33 (41/116)

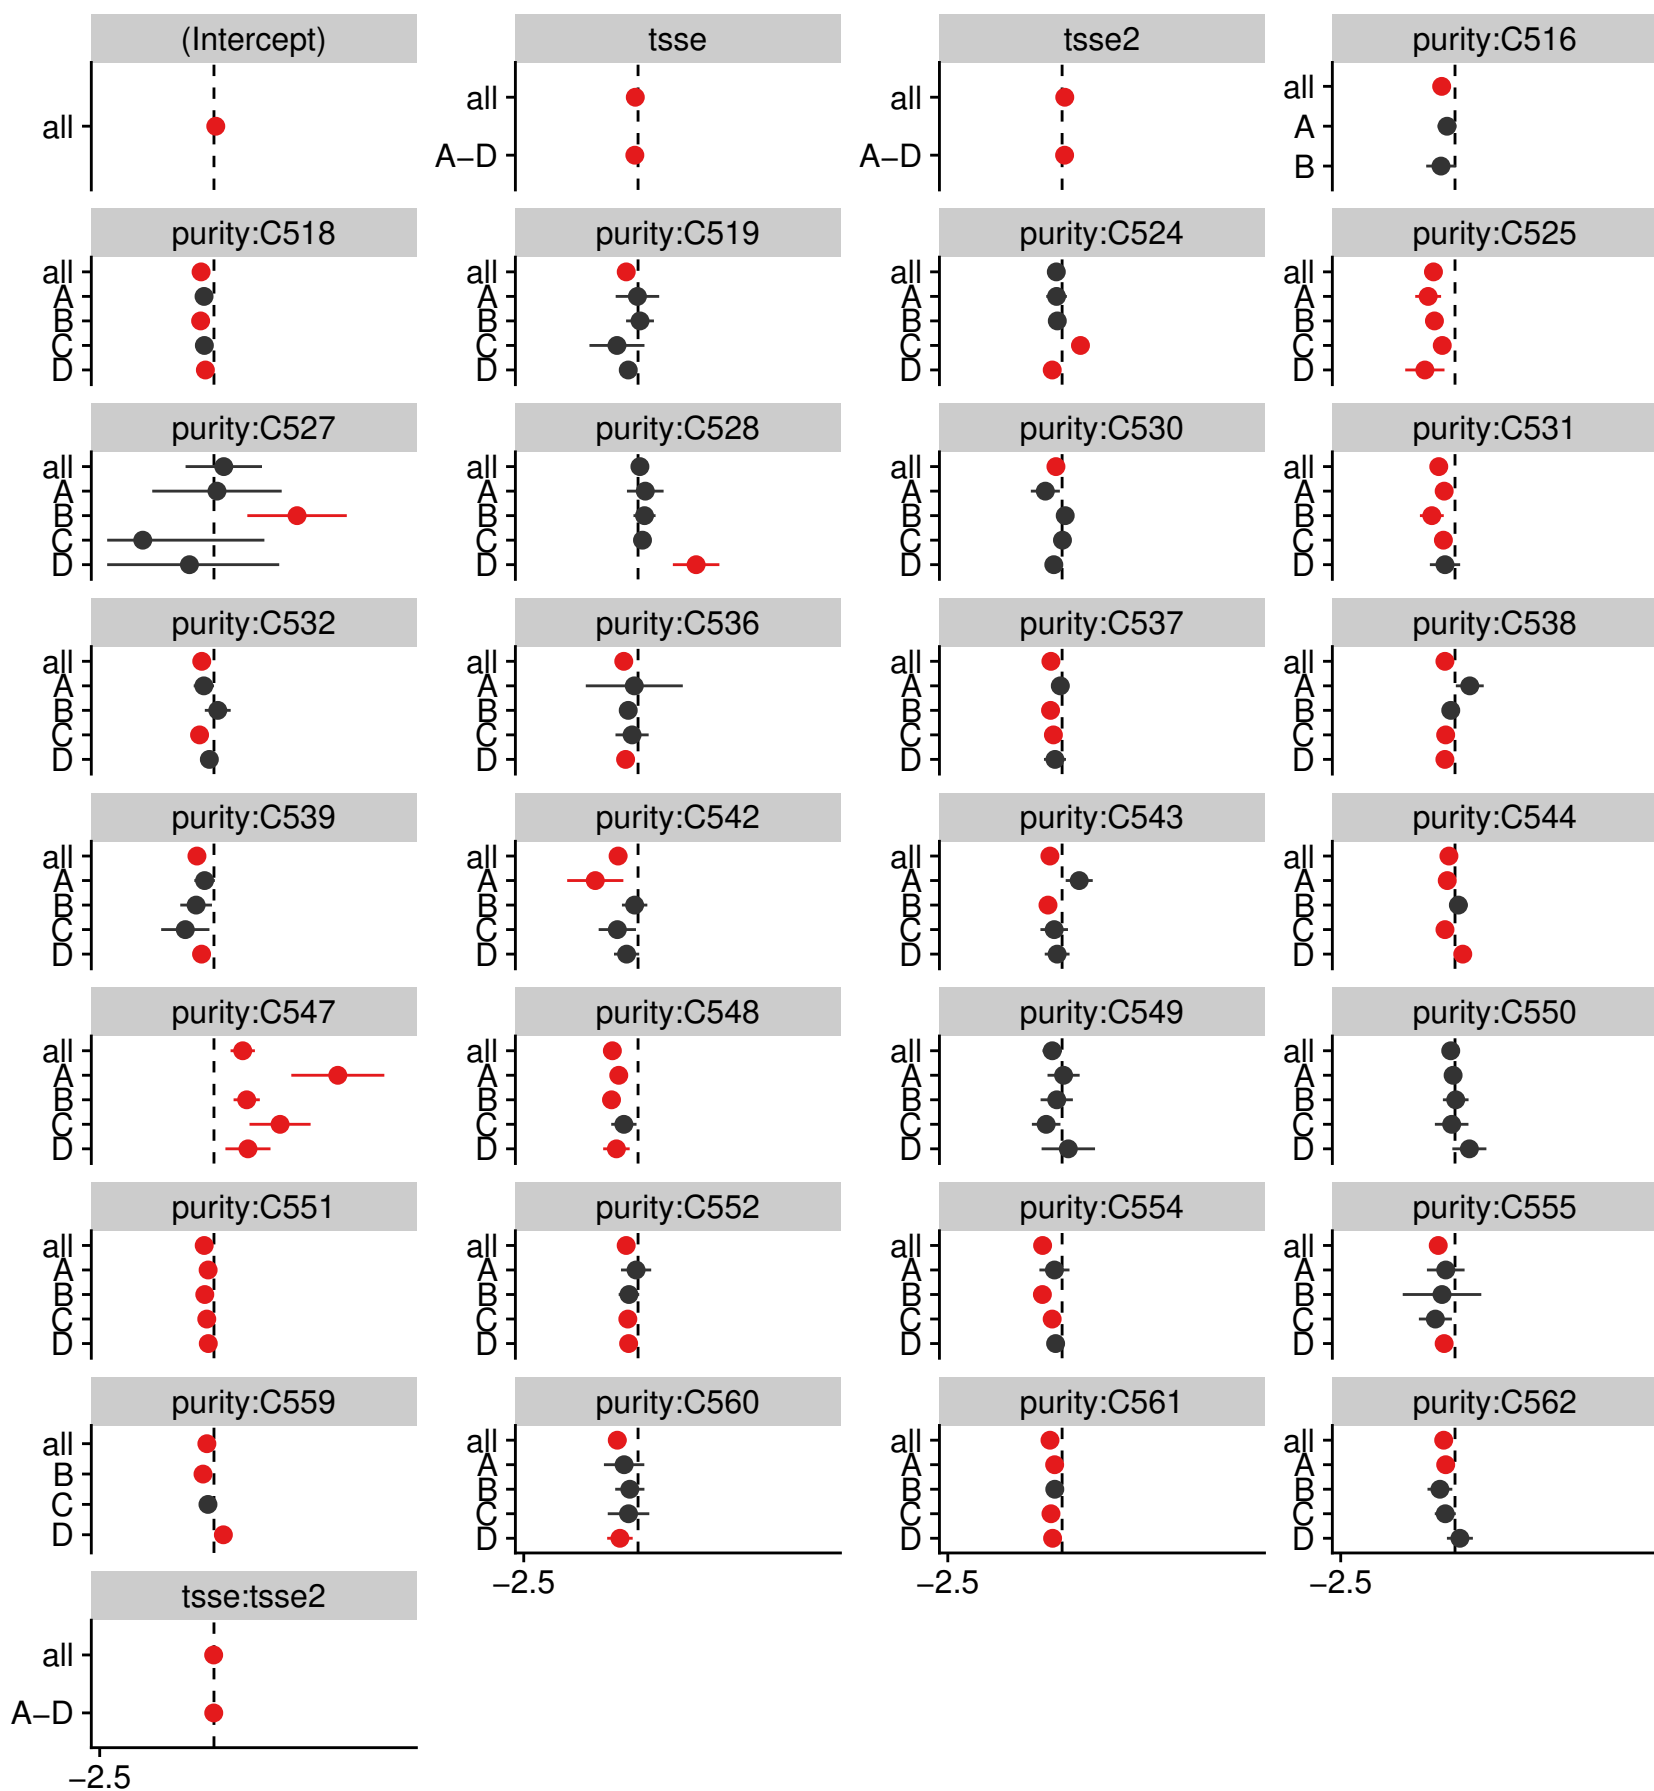

p\_c = < 2.22e-16, p\_sc = 1.3982e-10



# CDX2\_uc\_dTSS\_nPEAK

+ 11/33 (1/116), - 3/33 (37/116)

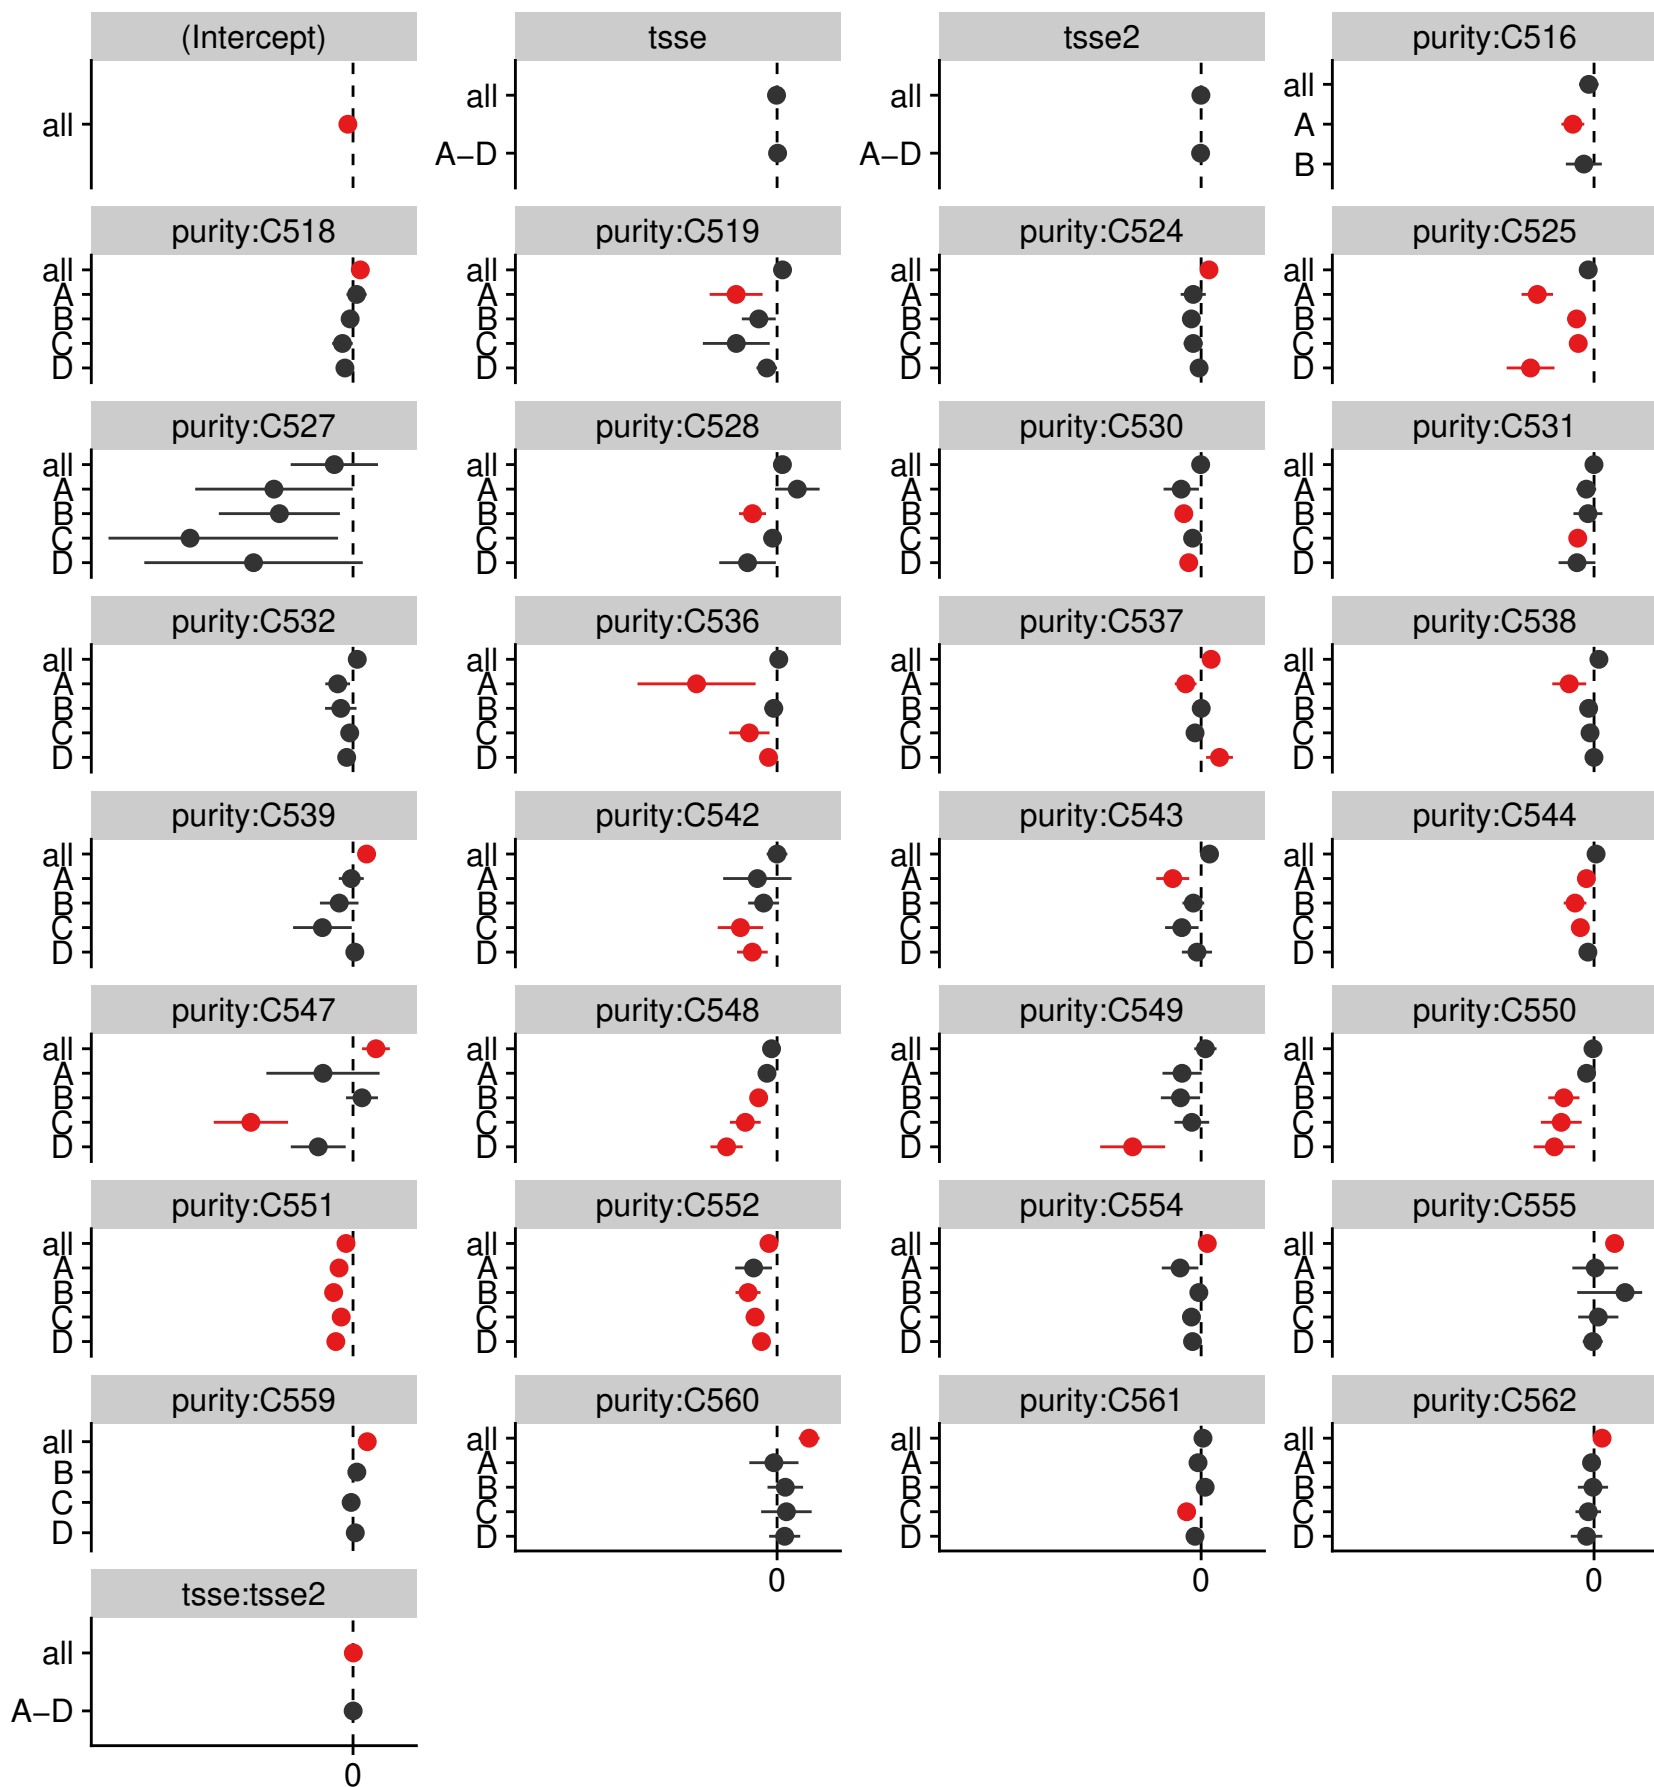

Coefficient

p\_c = < 2.22e-16, p\_sc = 0.25693

# CPEB1\_uc\_cTSS\_oPEAK

+ 9/33 (1/116), - 6/33 (54/116)

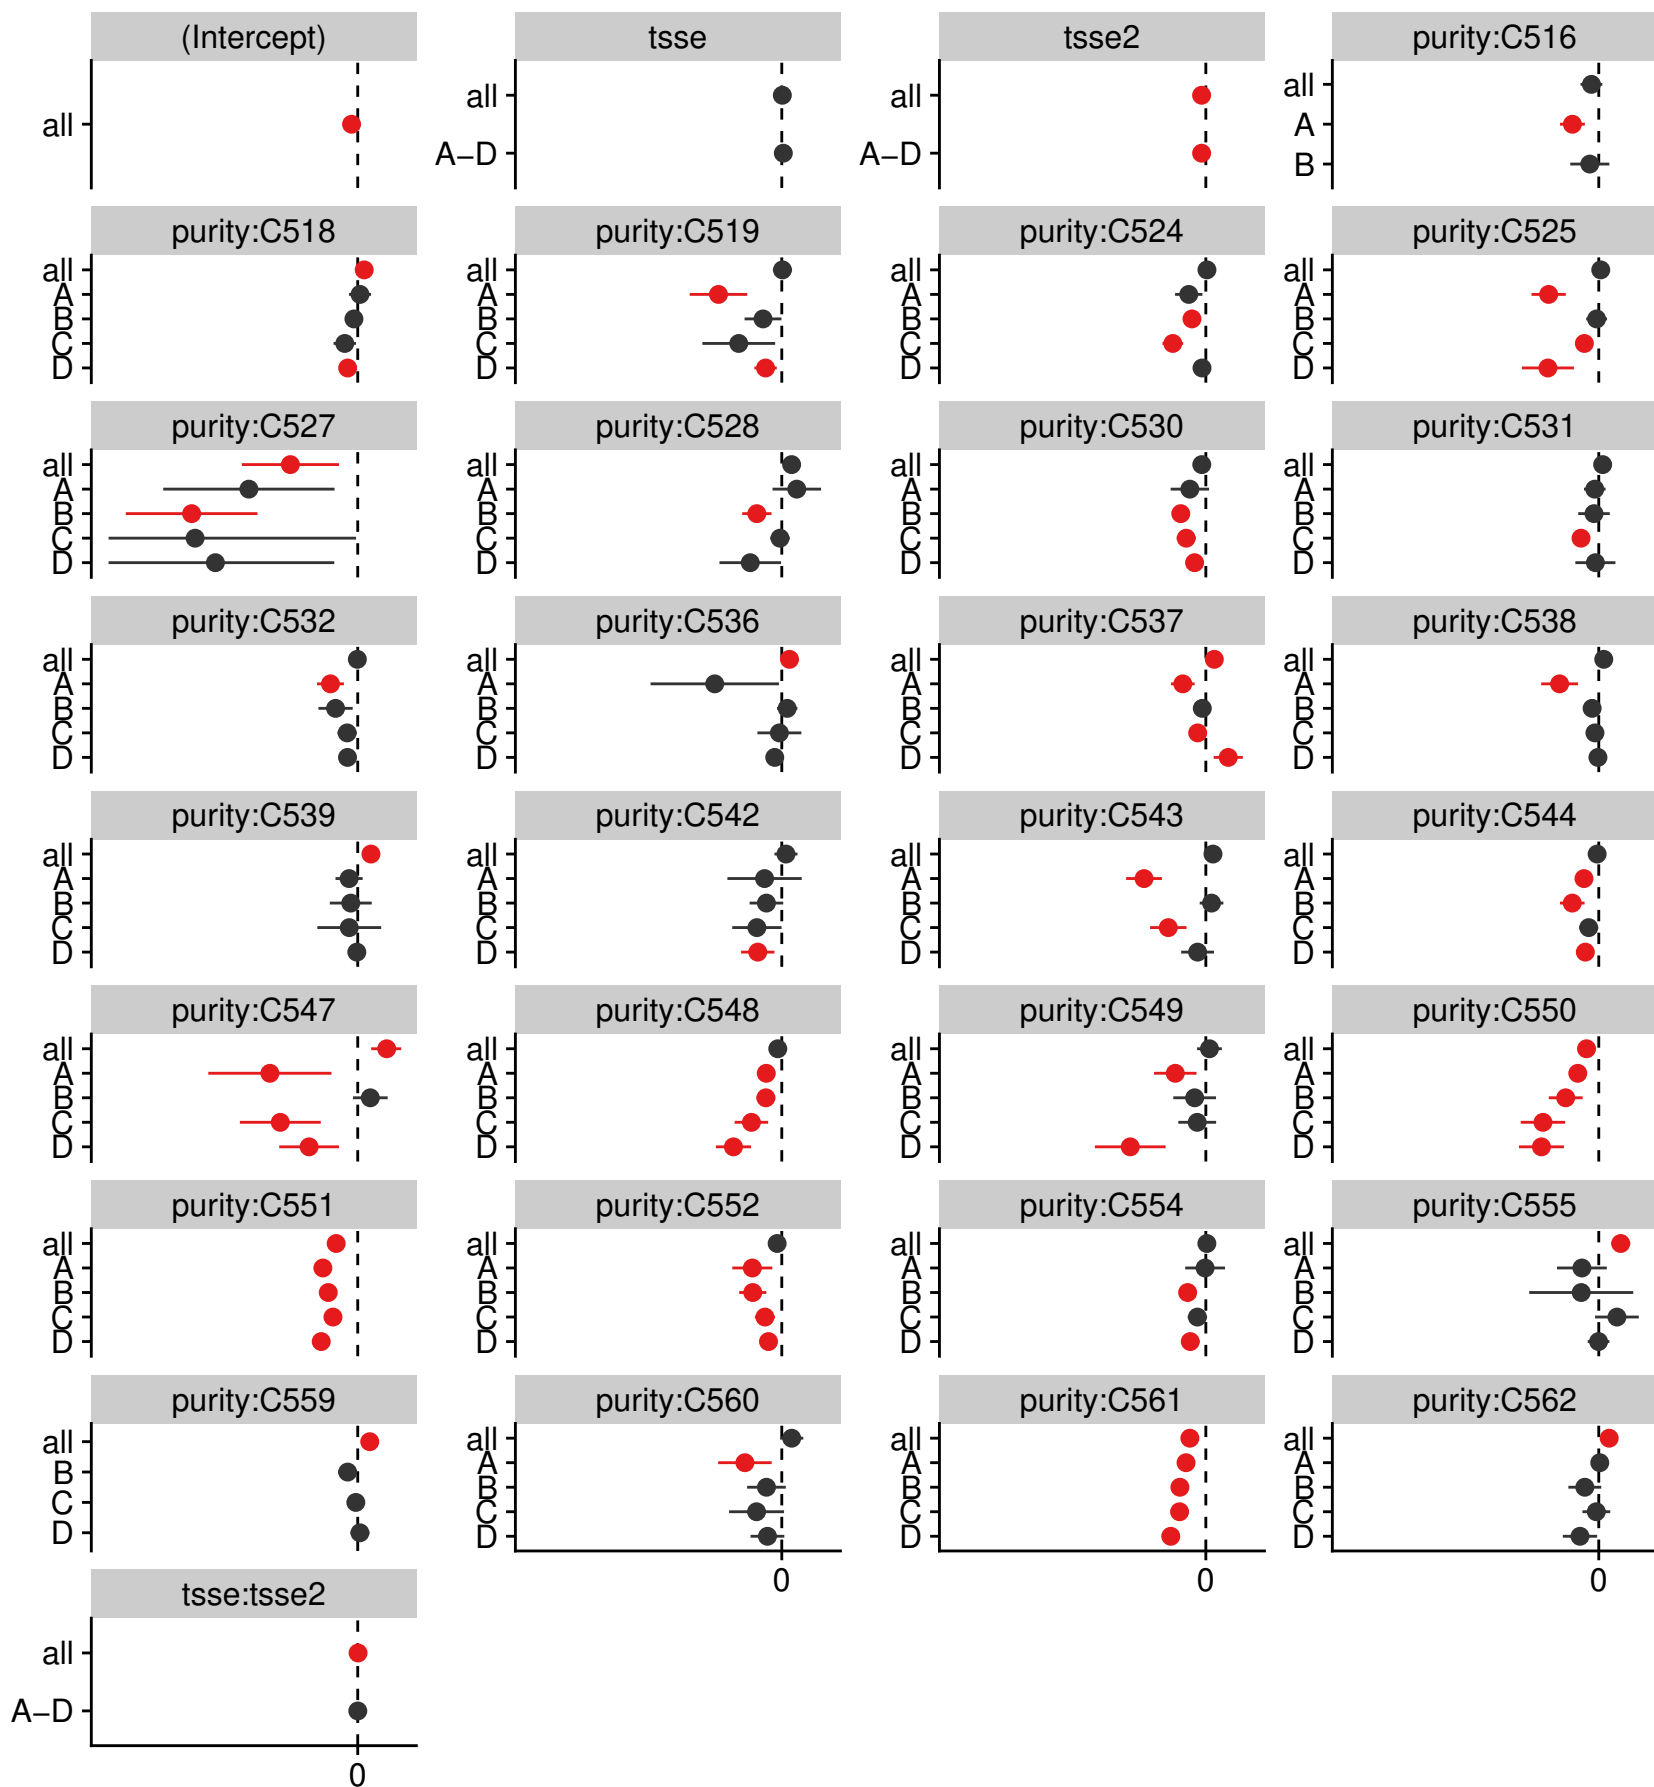

Coefficient

$p_c = < 2.22e-16$ ,  $p_{sc} = 0.0010353$

# CTCFL\_uc\_cTSS\_oPEAK

+ 7/33 (22/116), - 11/33 (22/116)

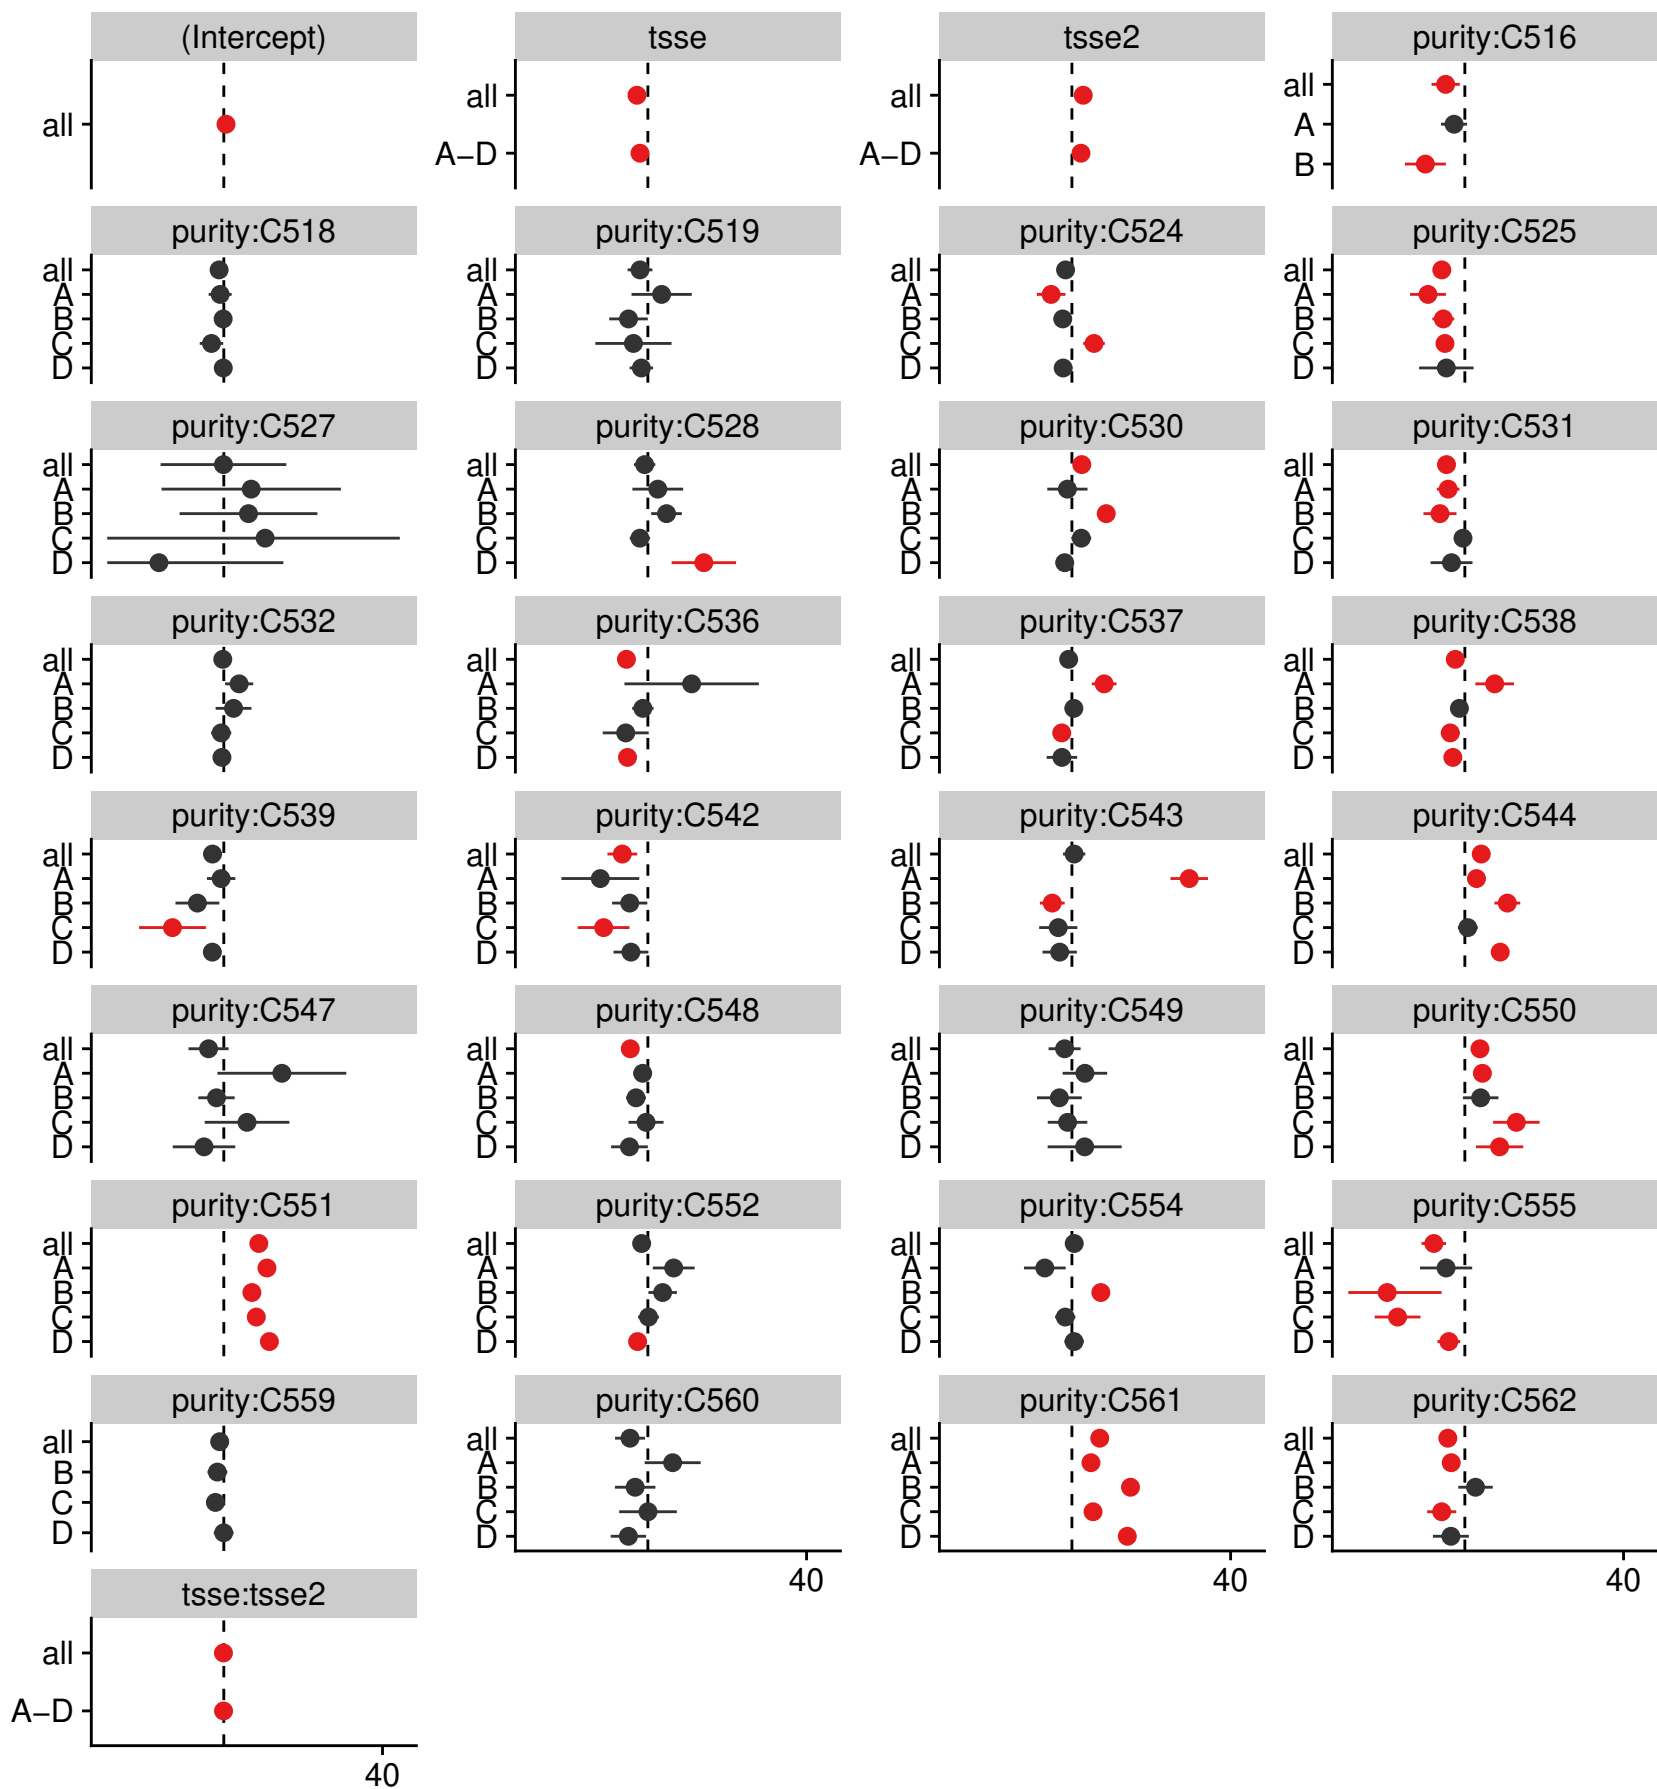

Coefficient

p\_c = < 2.22e-16, p\_sc = < 2.22e-16

# CTCFL\_uc\_dTSS\_oPEAK

+ 7/33 (23/116), - 12/33 (25/116)

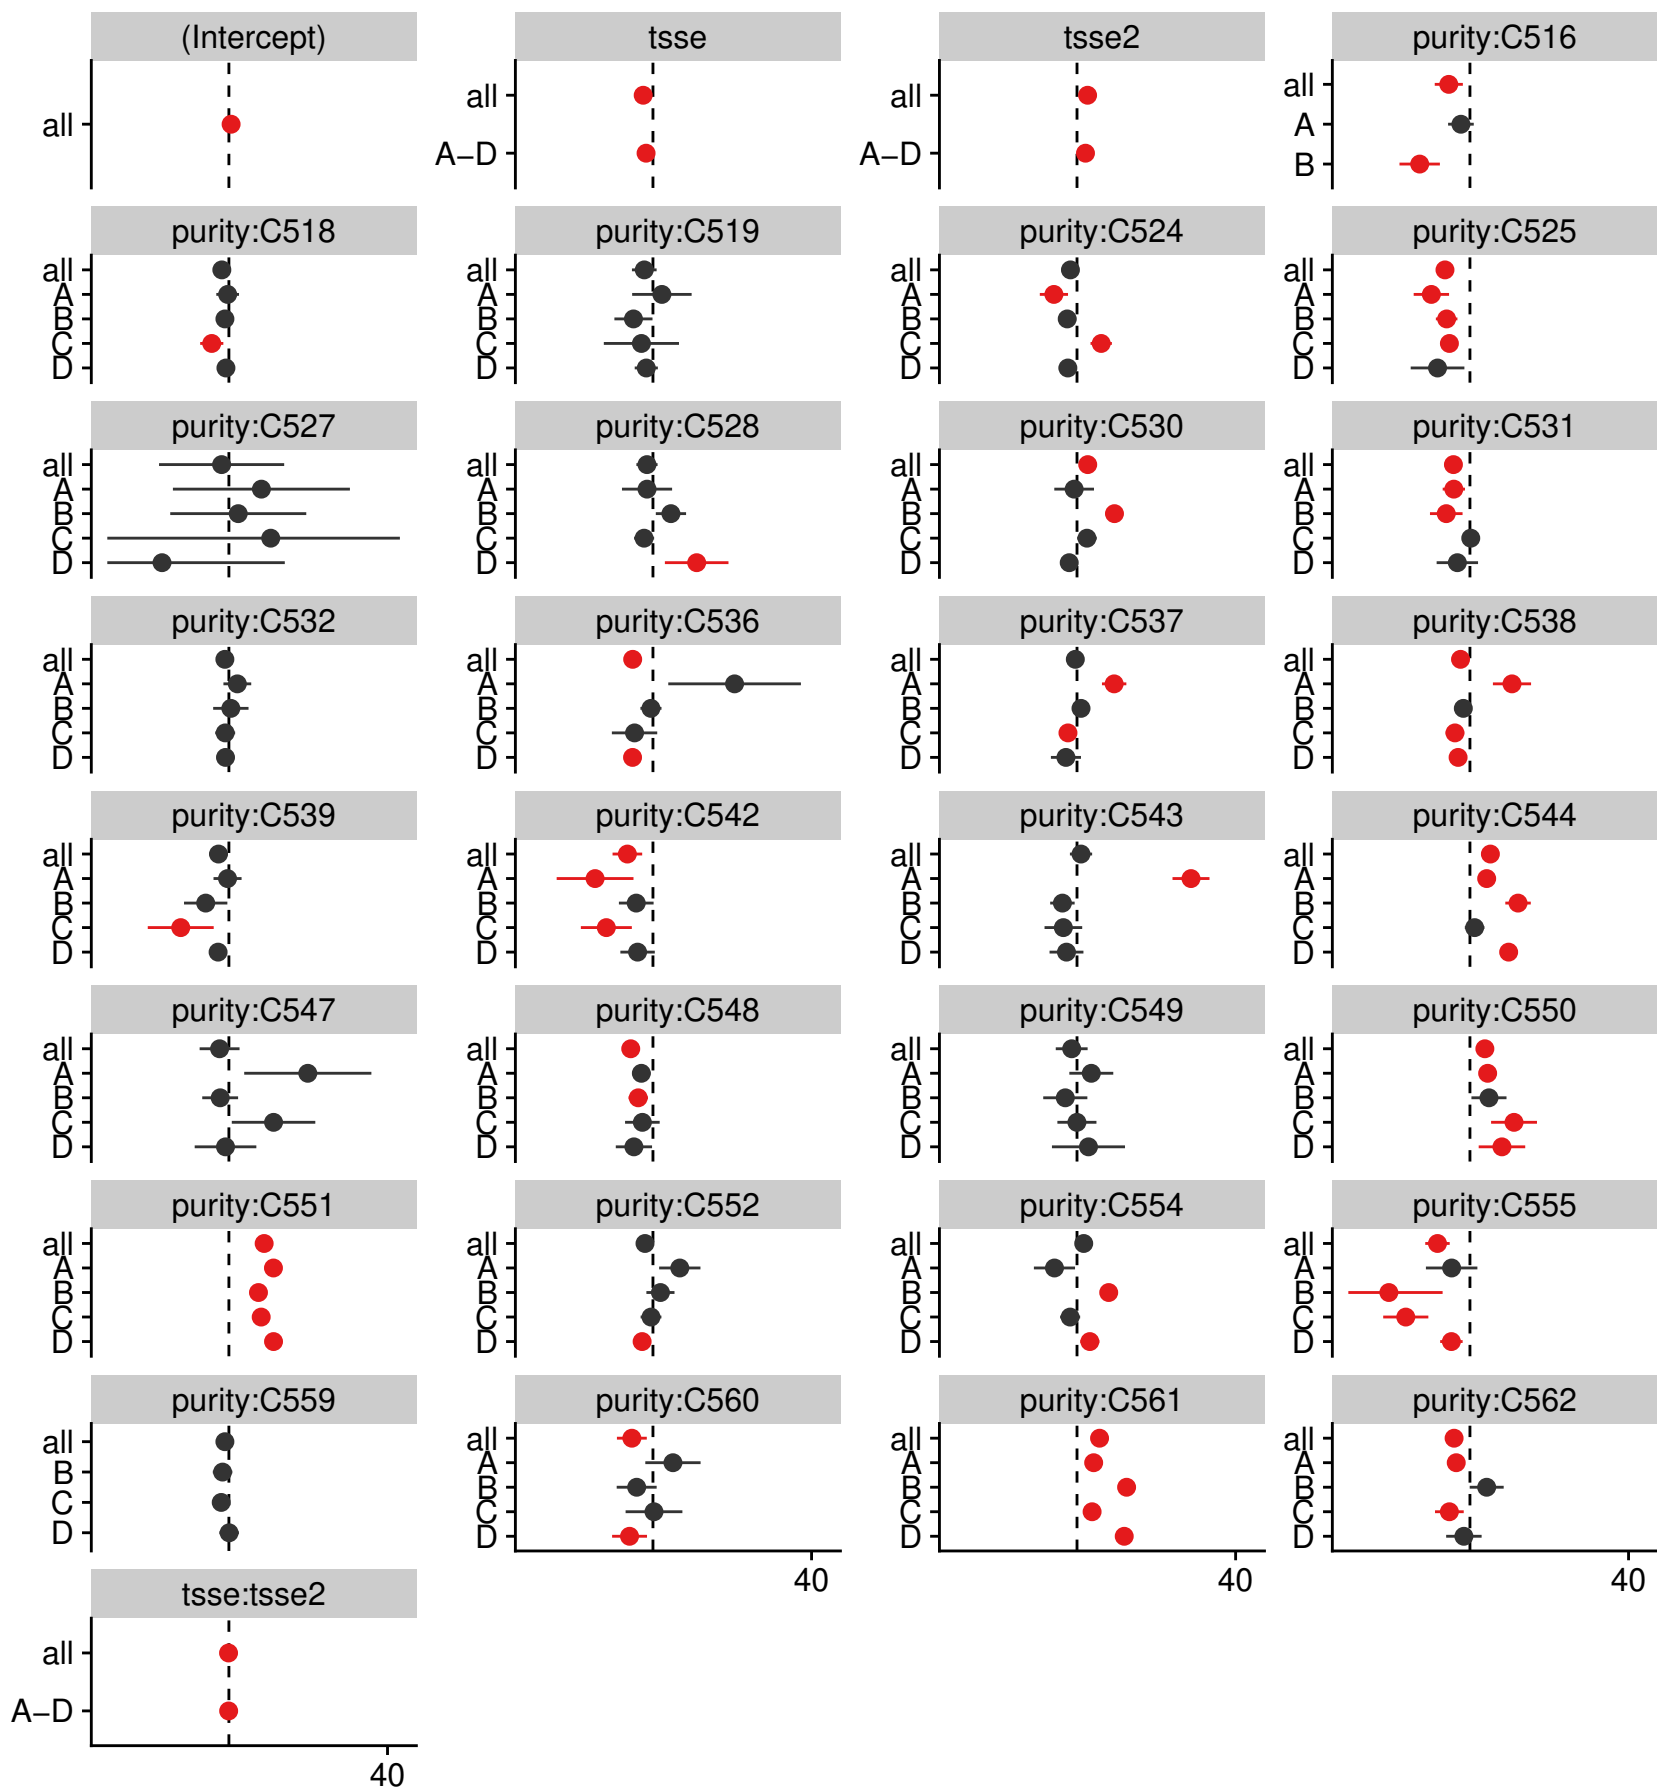

Coefficient

p\_c = < 2.22e-16, p\_sc = < 2.22e-16

# CTCF\_uc\_cTSS\_oPEAK

+ 7/33 (21/116), - 14/33 (29/116)

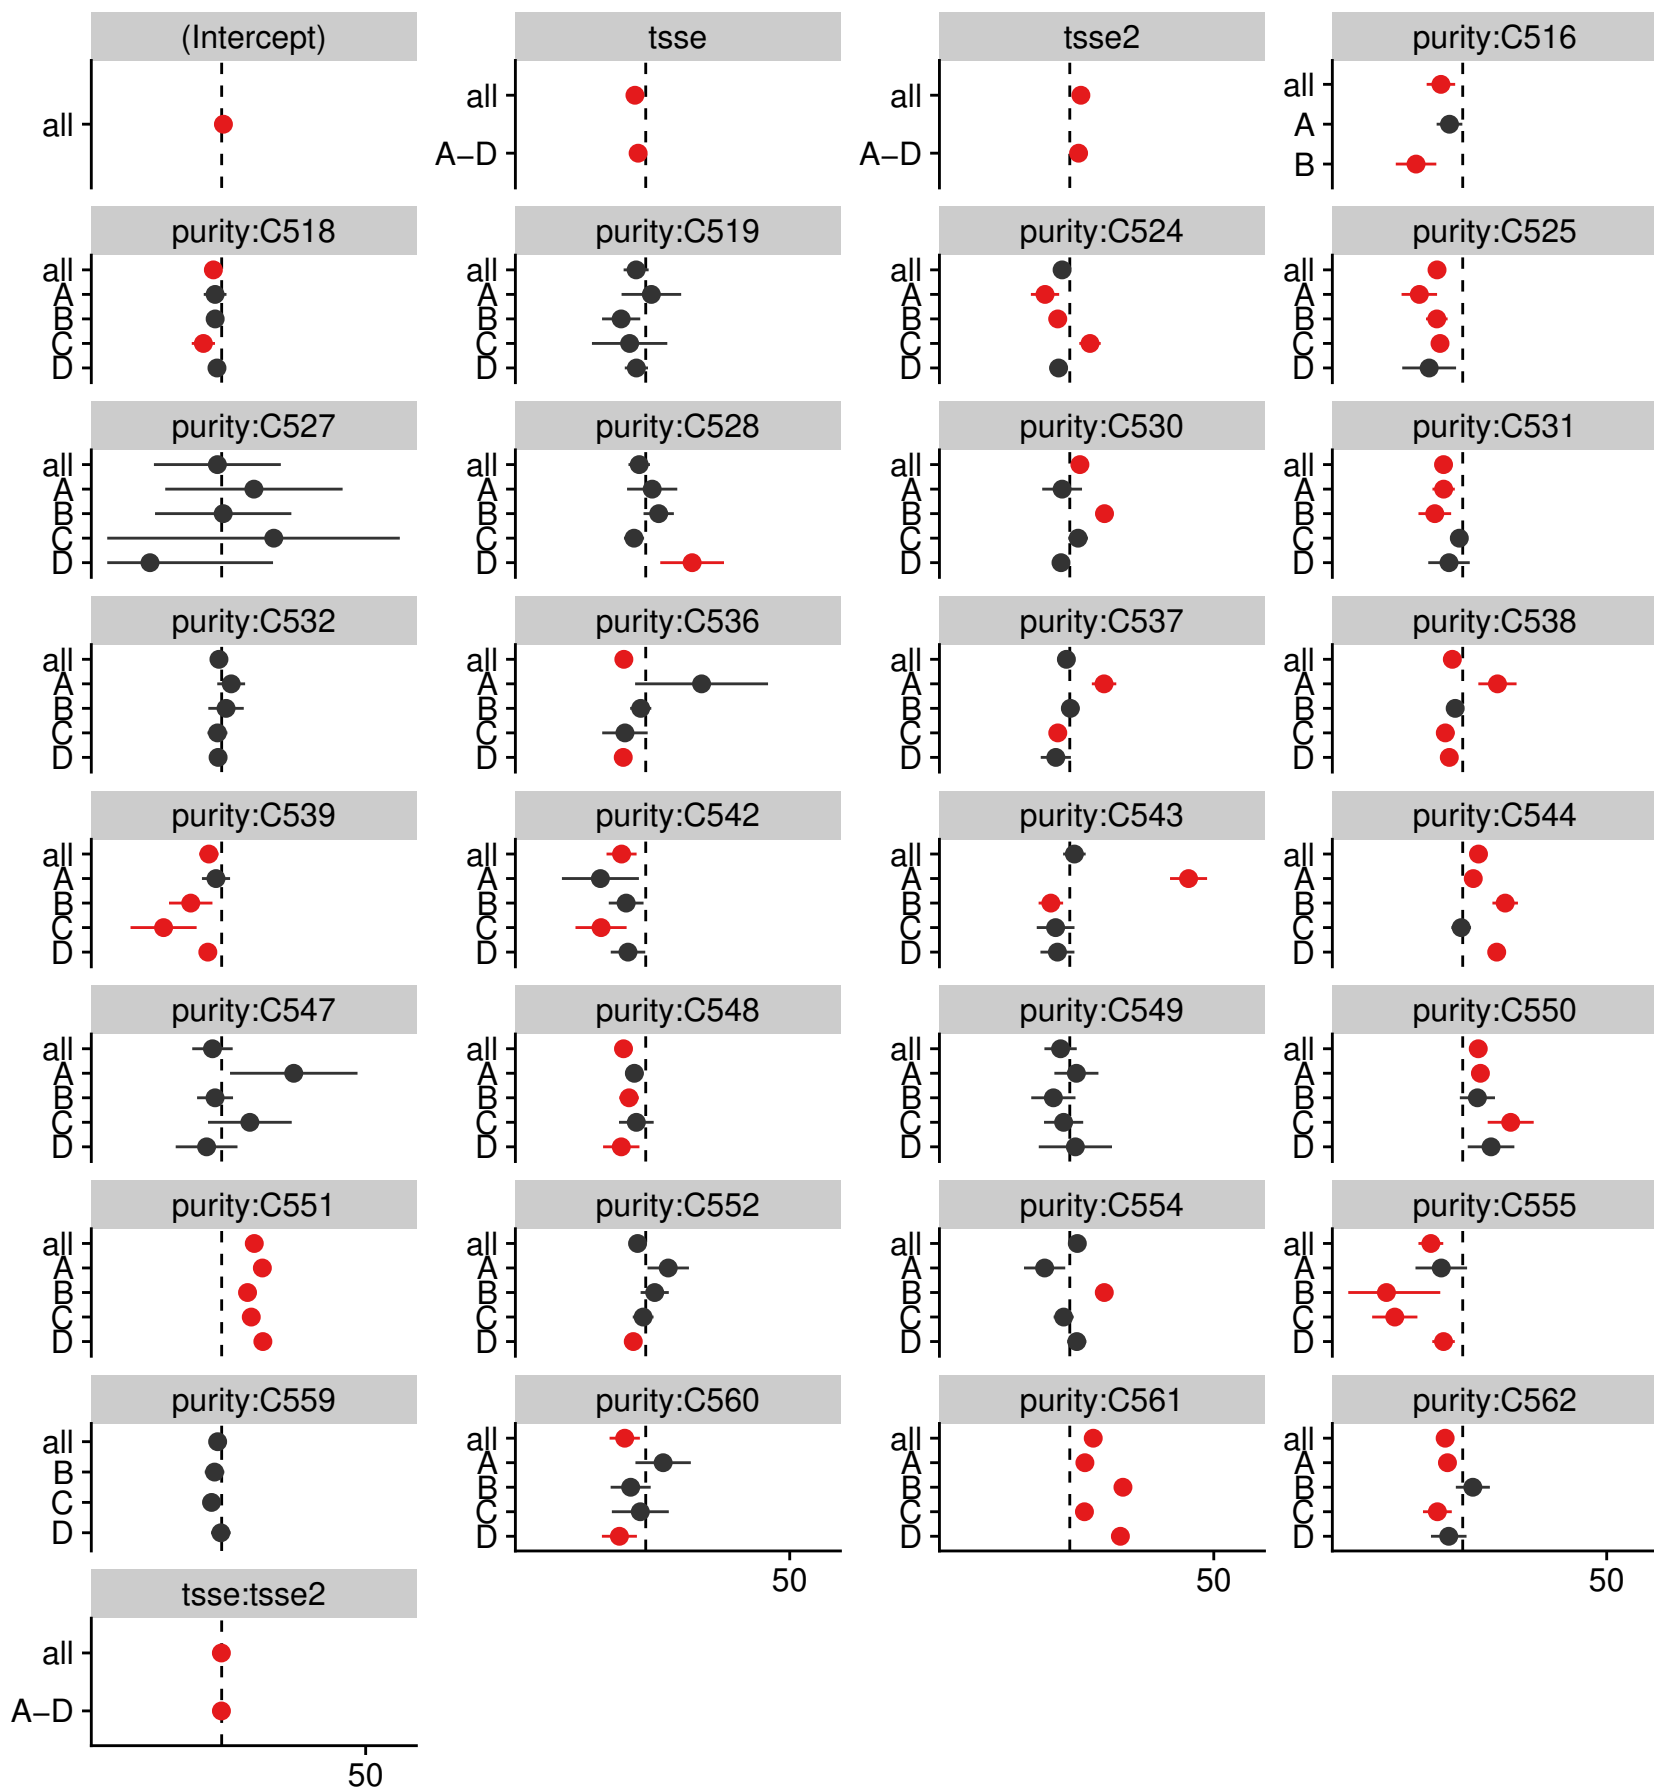

Coefficient

p\_c = < 2.22e-16, p\_sc = < 2.22e-16

# CTCF\_uc\_dTSS\_oPEAK

+ 8/33 (23/116), - 14/33 (31/116)

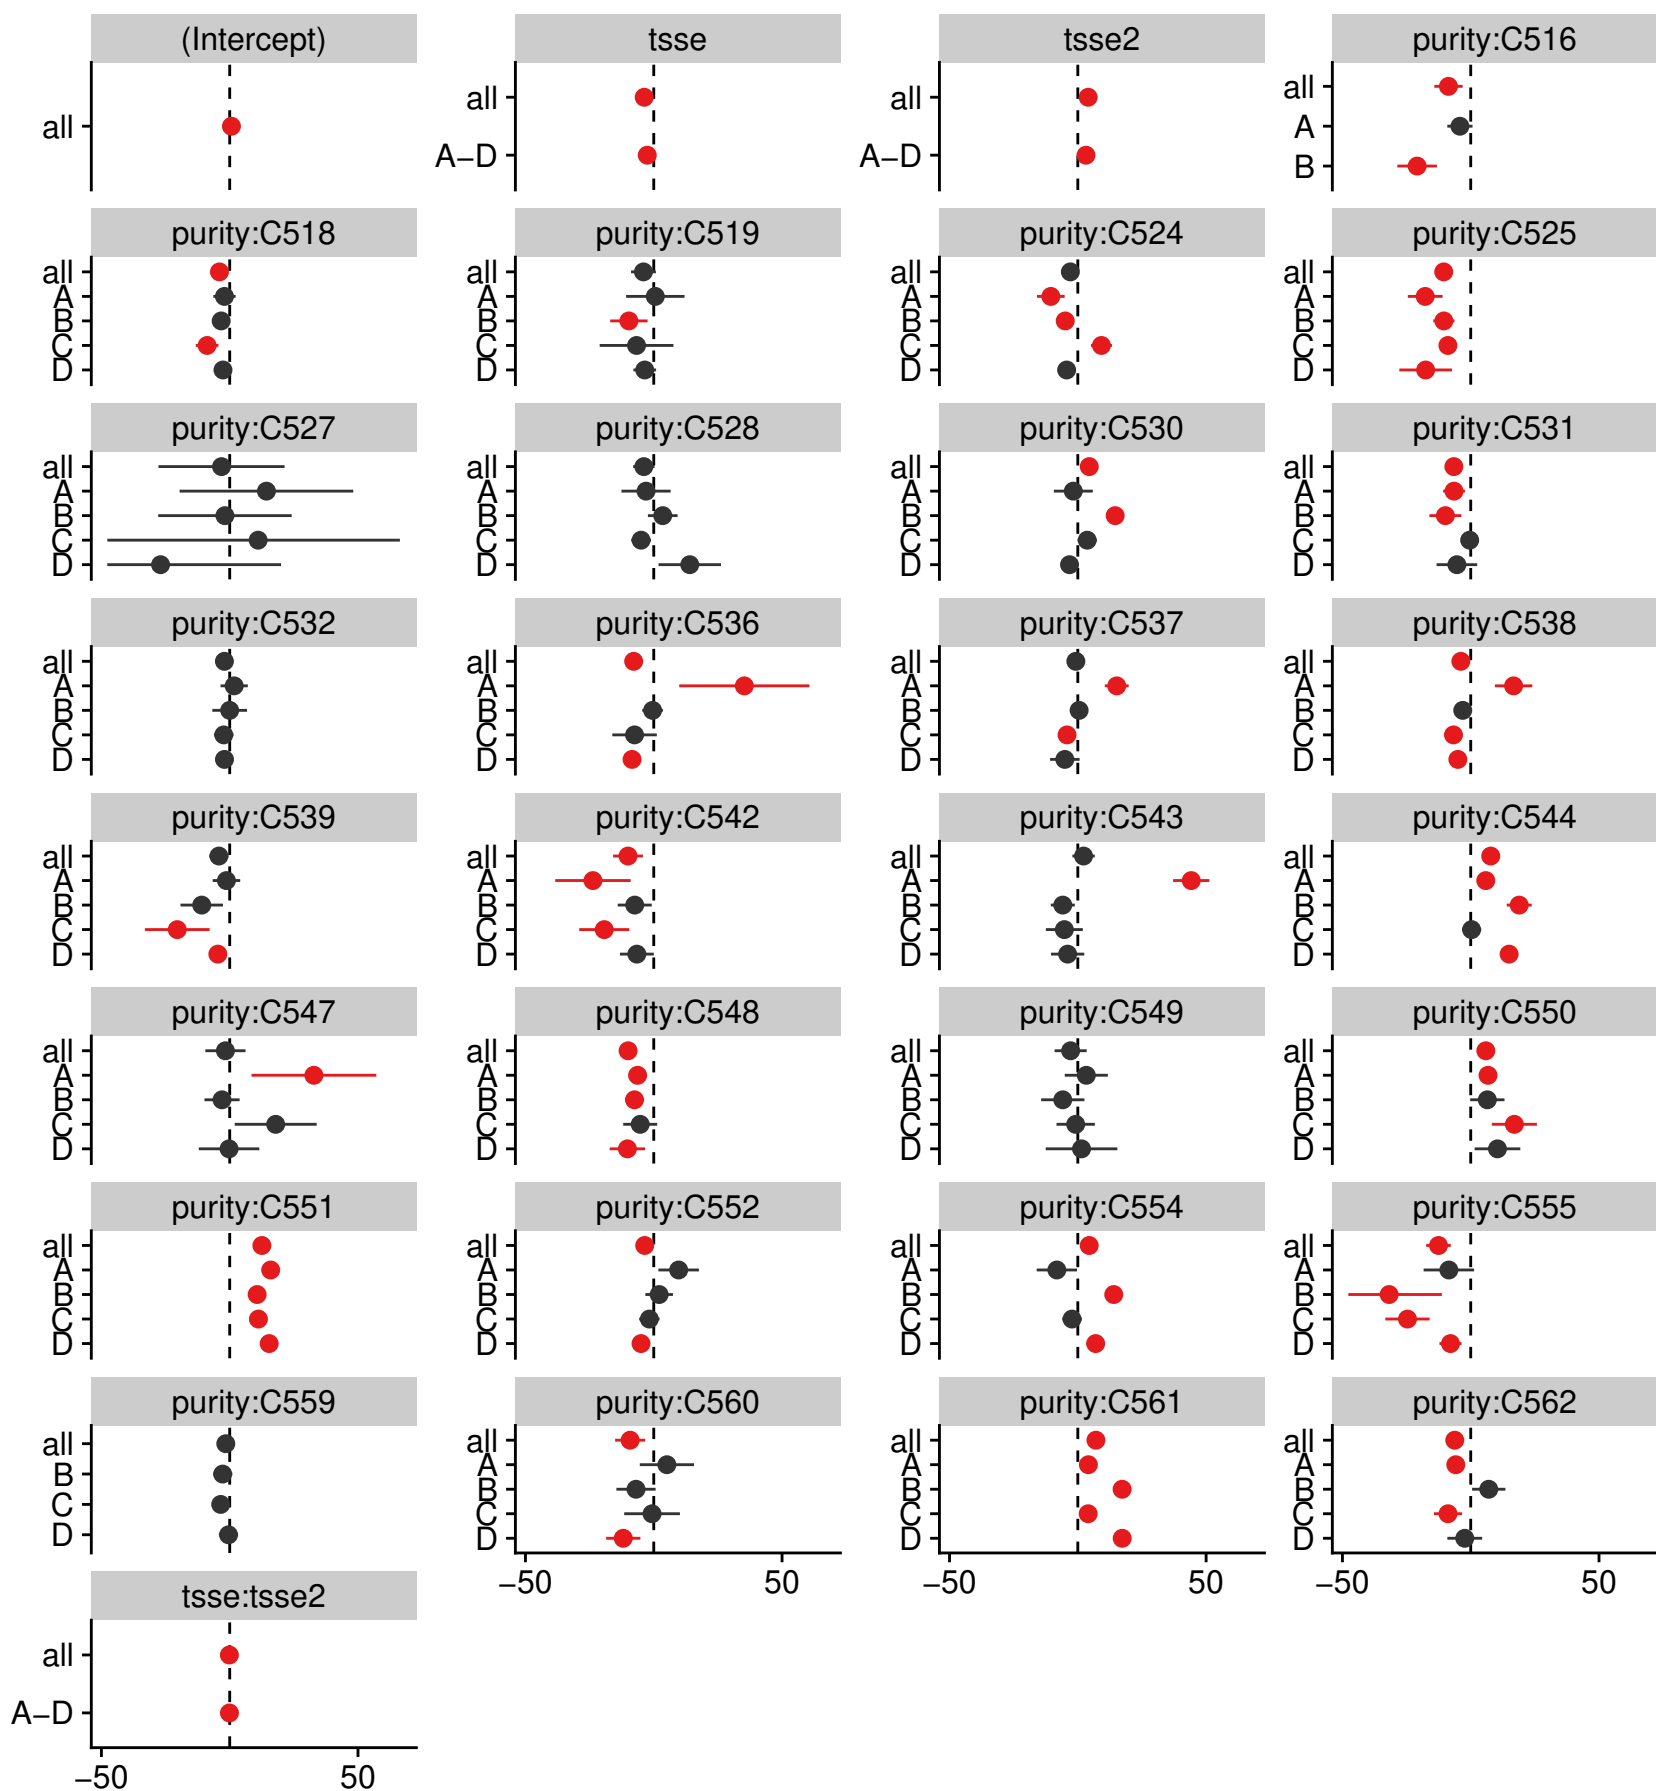

p\_c = < 2.22e-16, p\_sc = < 2.22e-16

# CTCF\_uc\_pTSS\_oPEAK

+ 7/33 (23/116), - 7/33 (10/116)

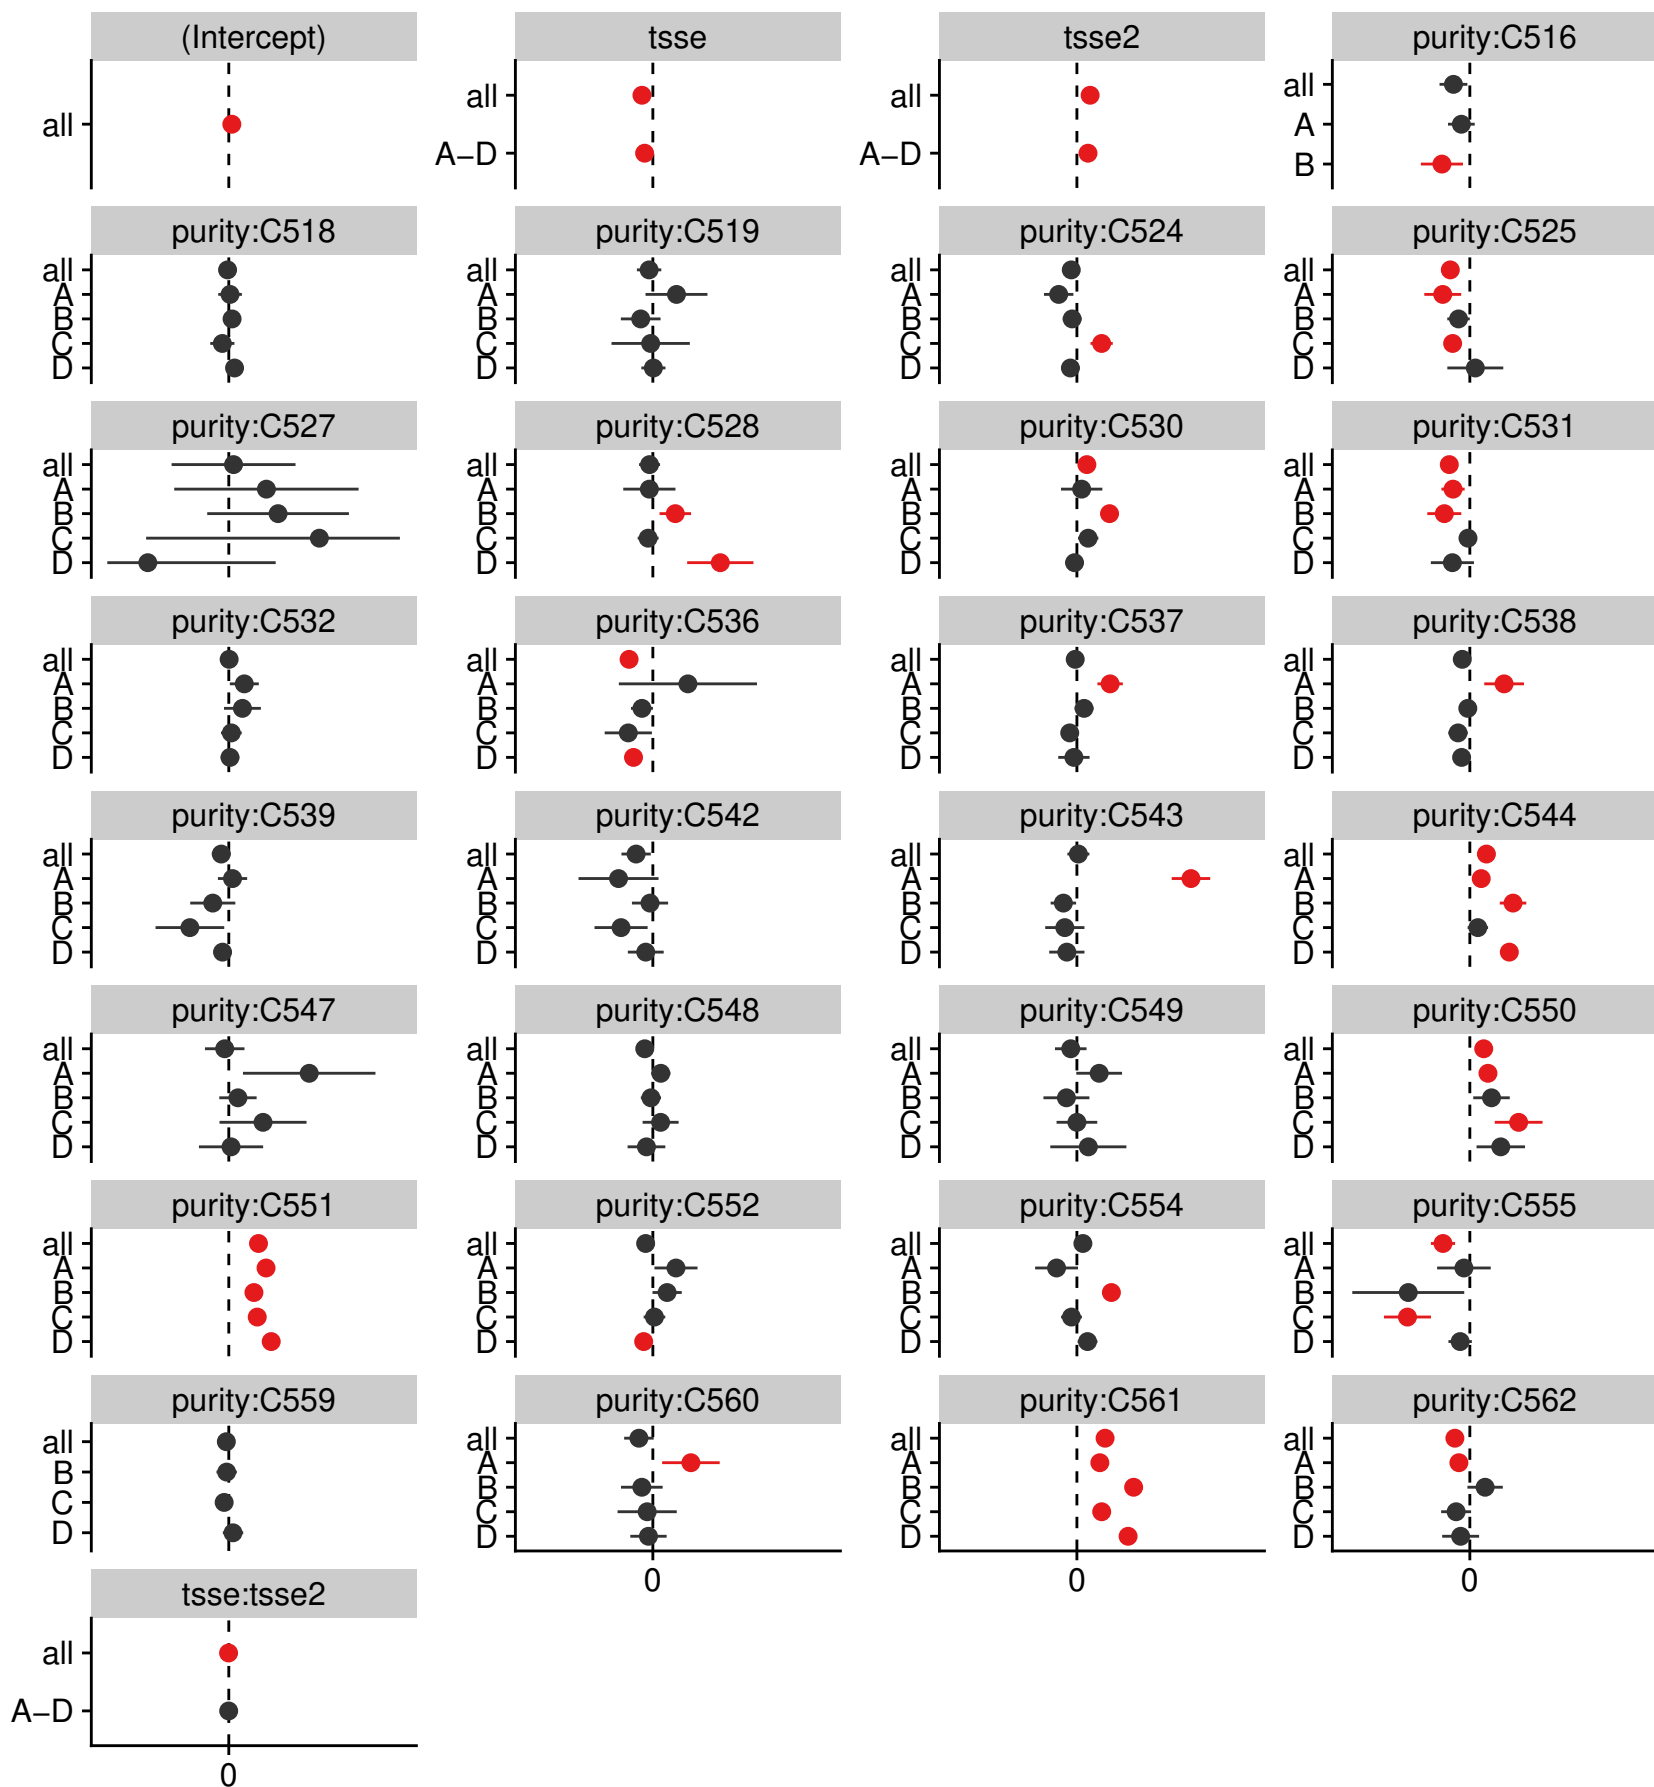

Coefficient

p\_c = < 2.22e-16, p\_sc = < 2.22e-16

# DBX2\_uc\_cTSS\_nPEAK

+ 10/33 (1/116), - 4/33 (39/116)

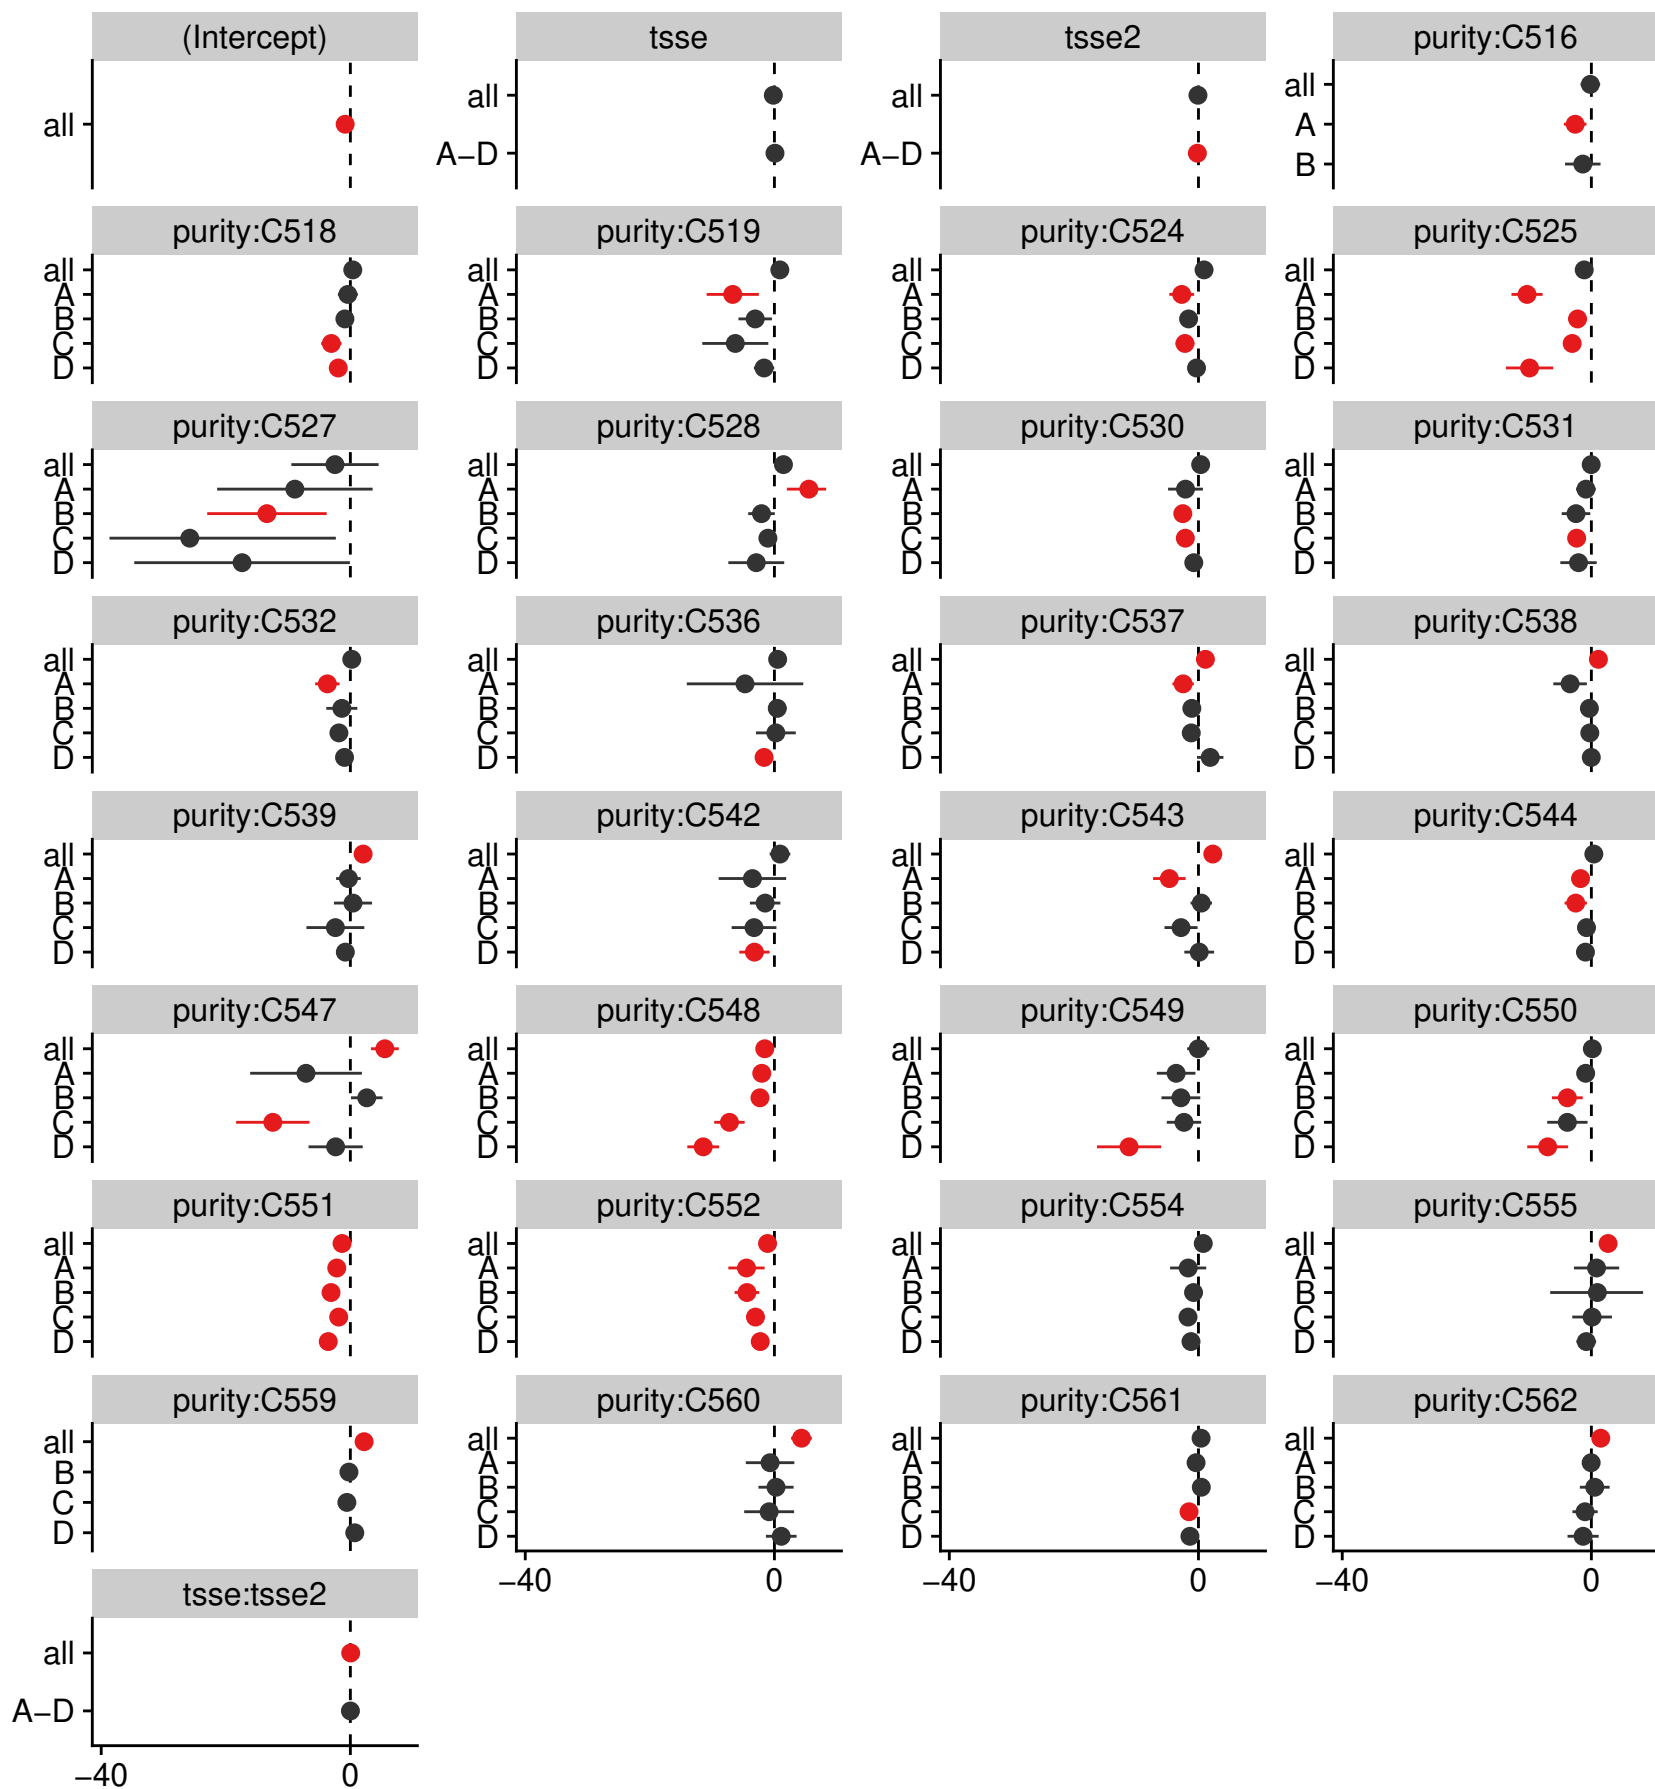

$p_c = < 2.22e-16$ ,  $p_{sc} = 0.021685$



# DBX2\_uc\_dTSS\_oPEAK

+ 12/33 (0/116), - 4/33 (42/116)

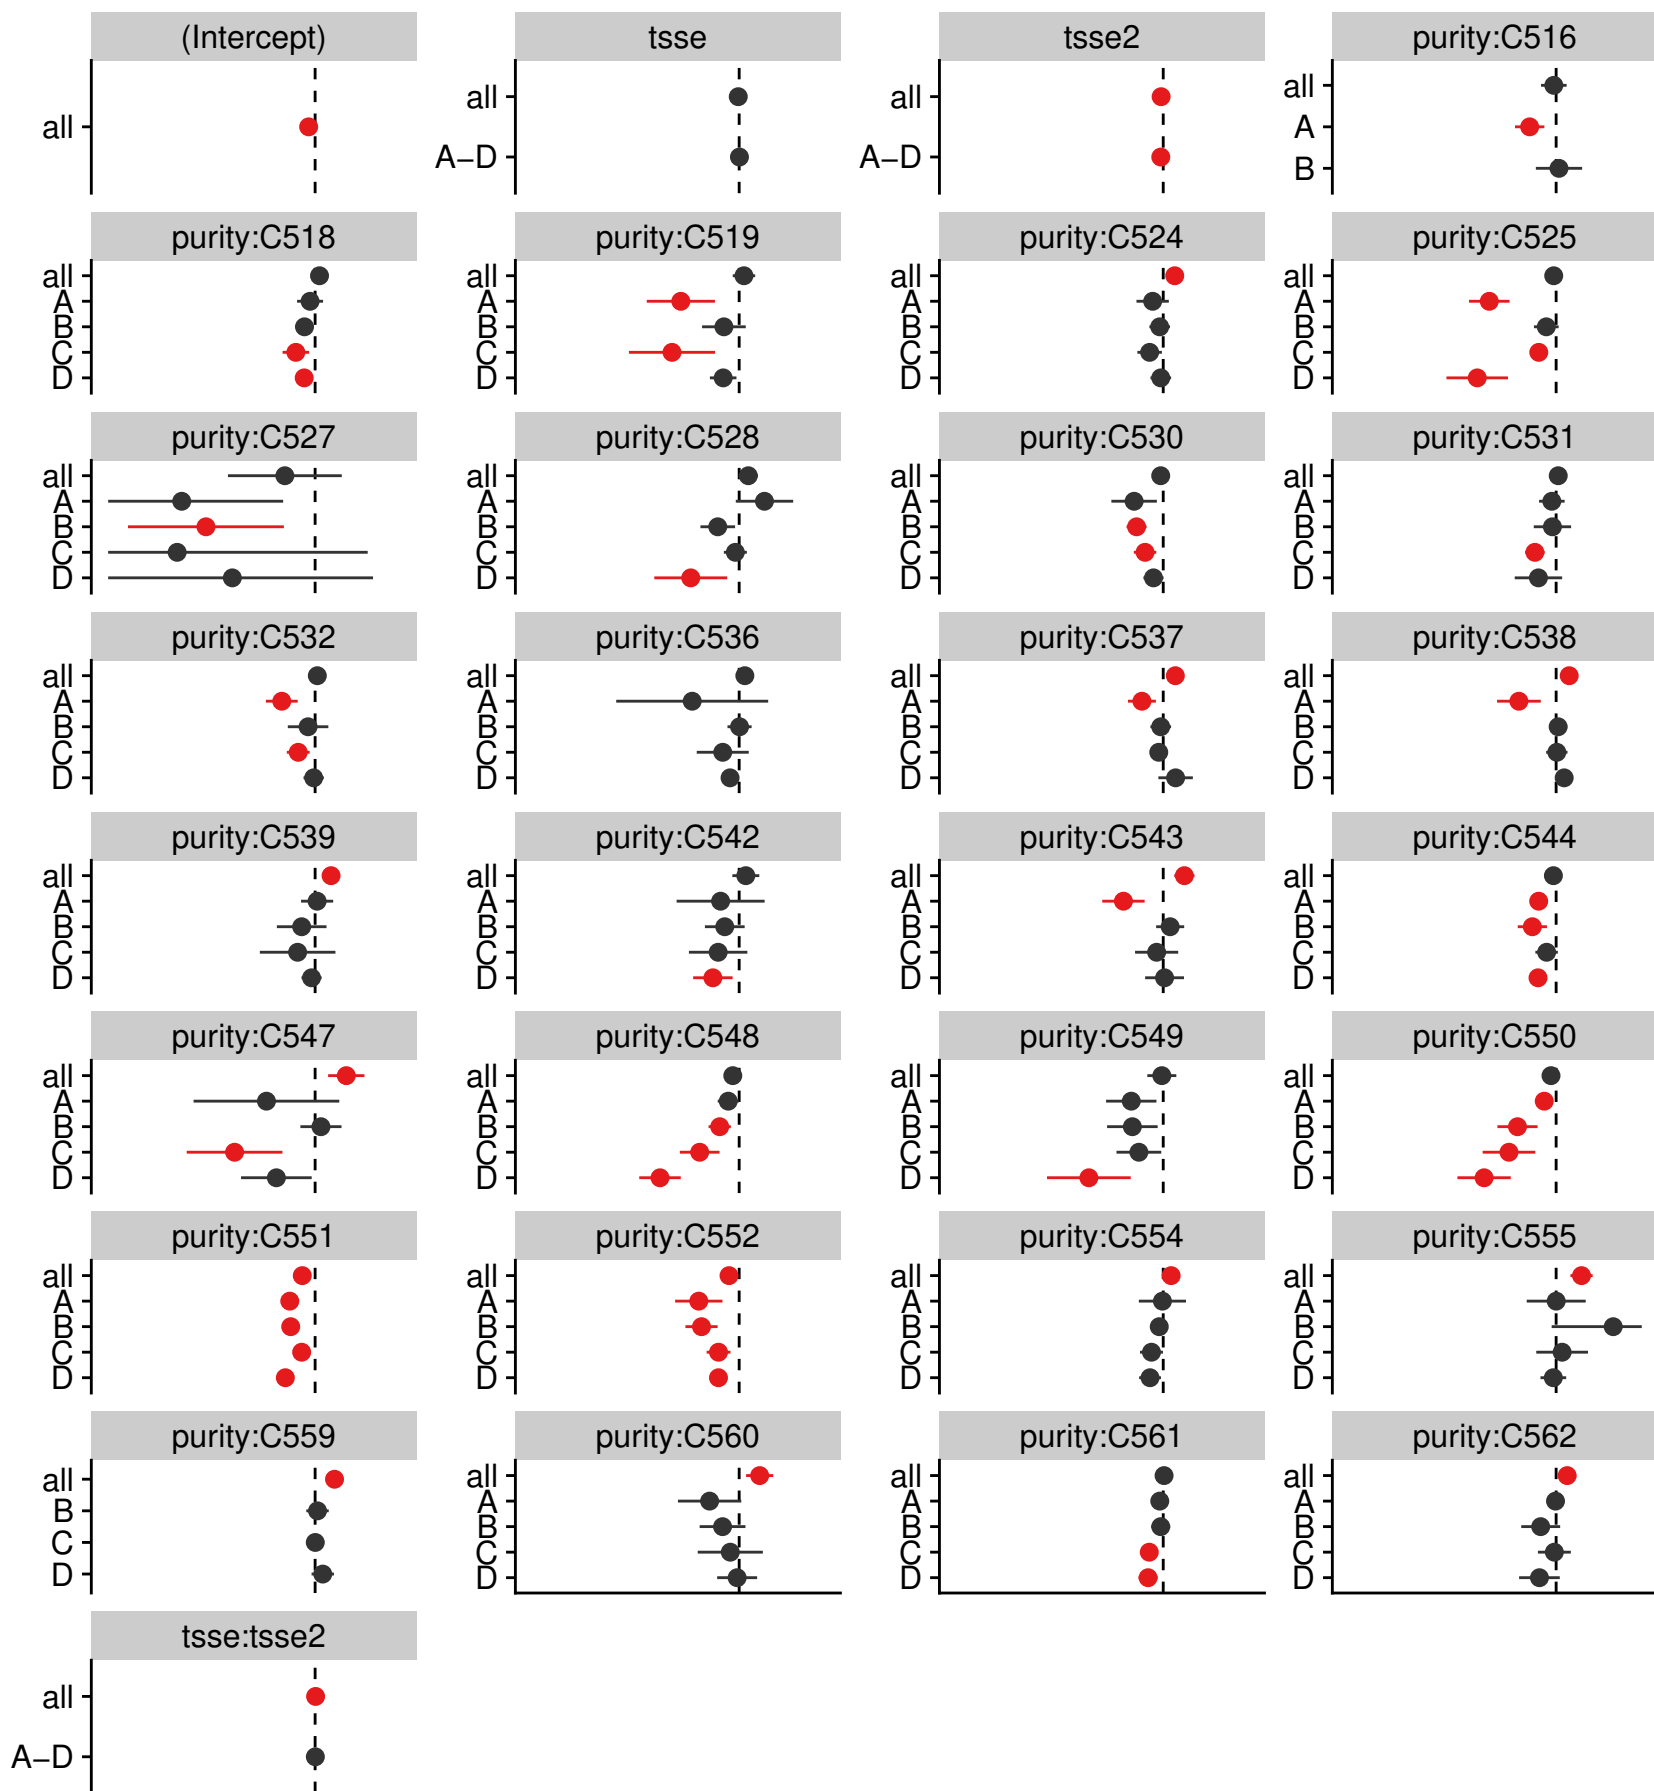

Coefficient

p\_c = < 2.22e-16, p\_sc = 0.019451

# DLX3\_uc\_cTSS\_nPEAK

+ 11/33 (1/116), - 2/33 (33/116)

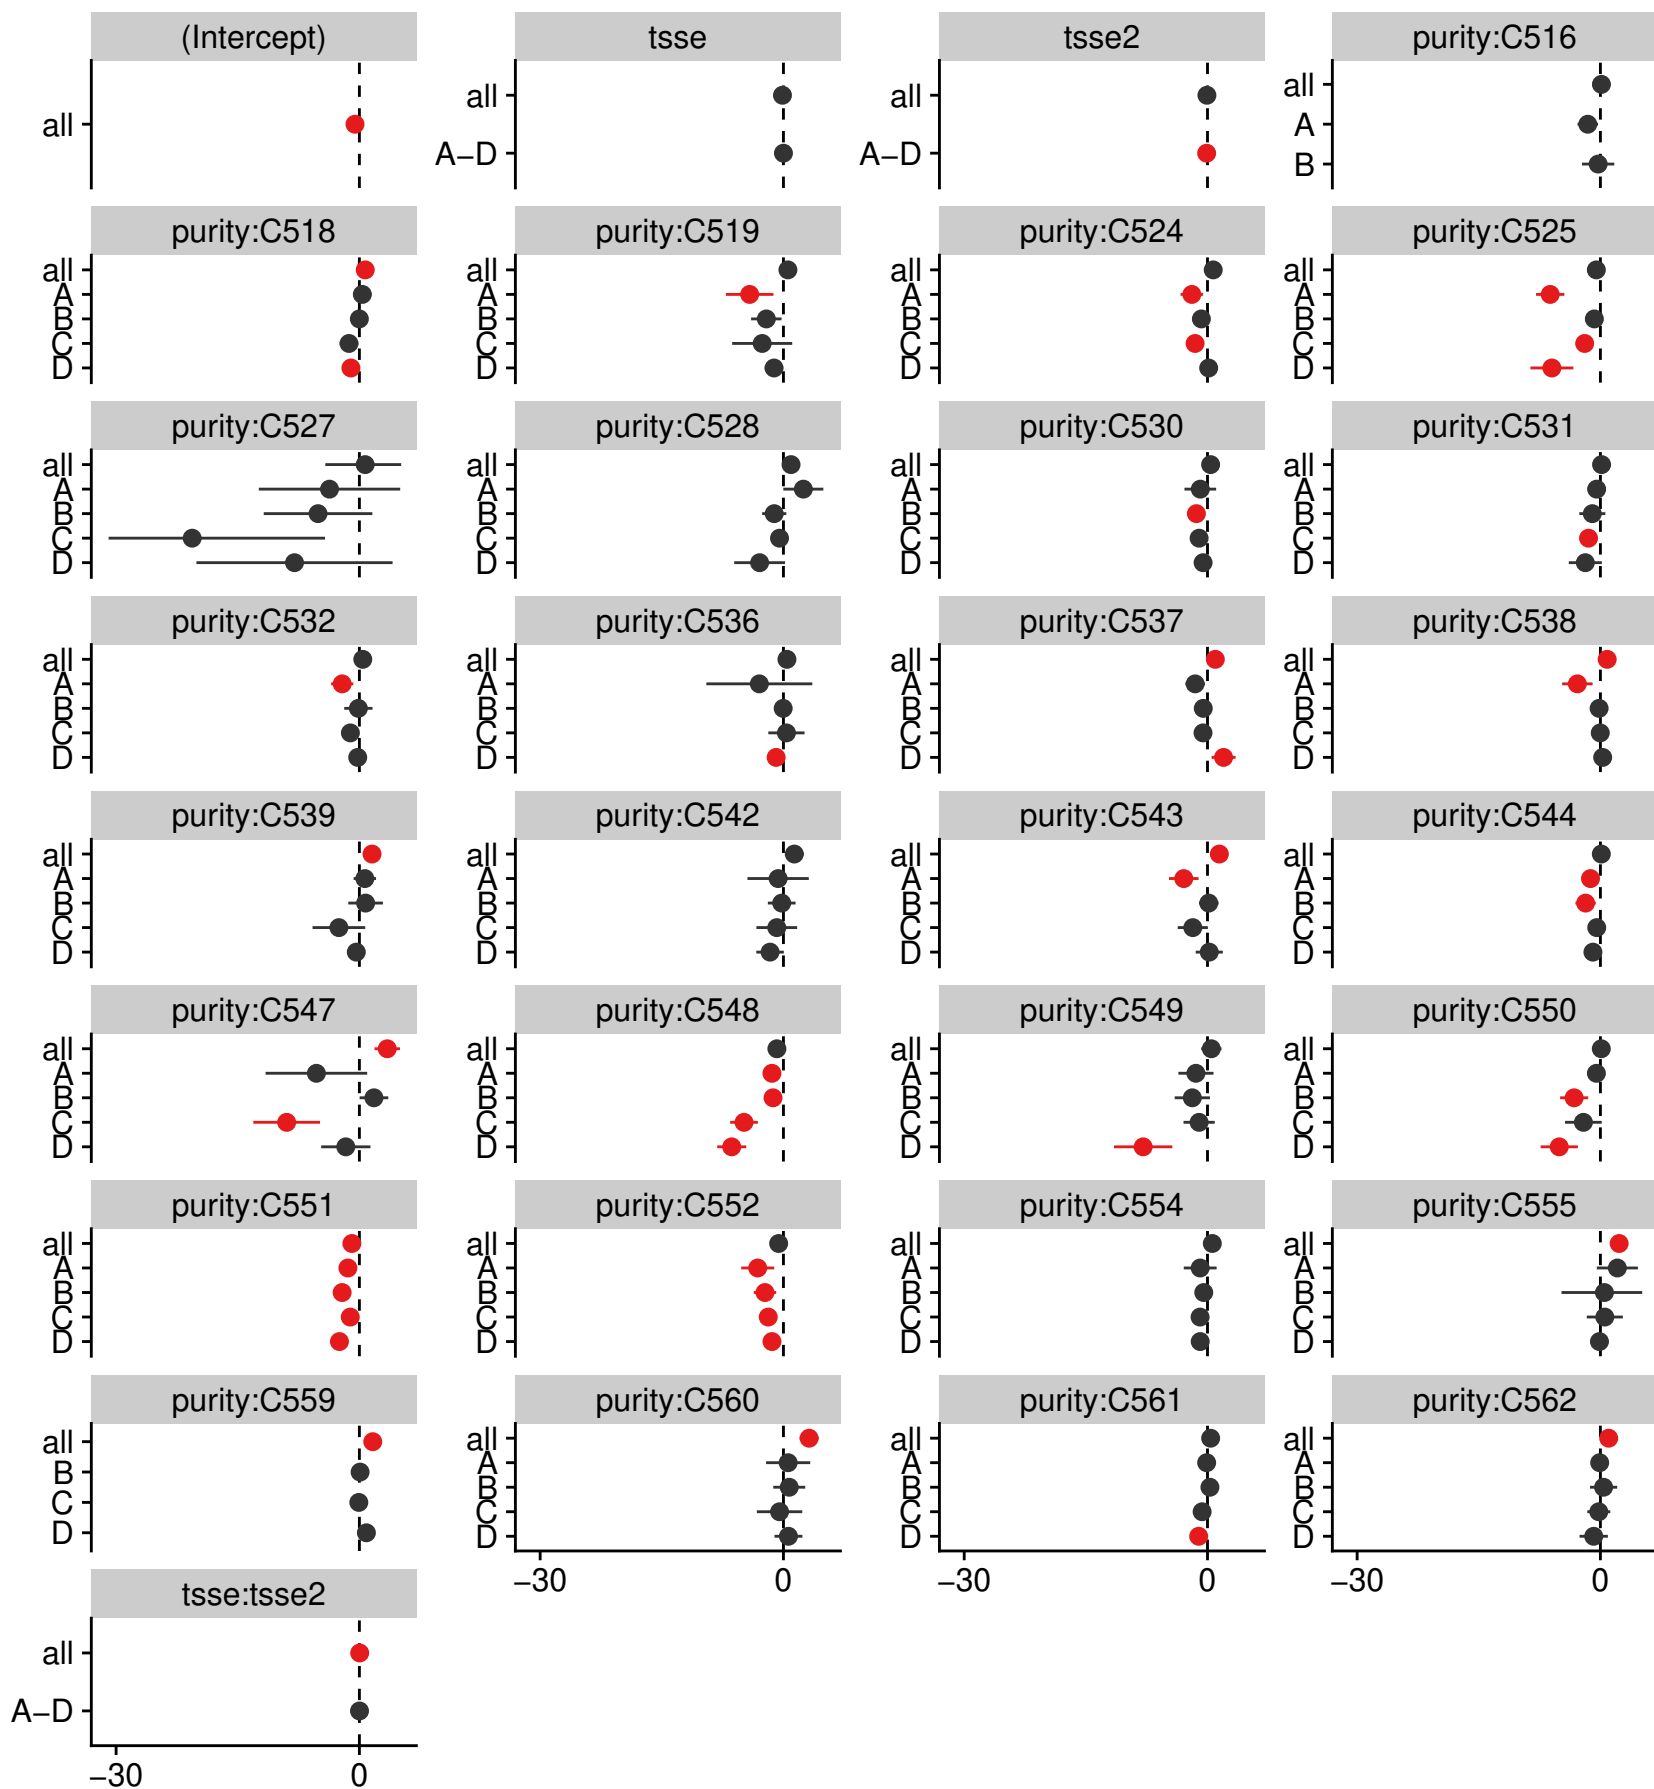

Coefficient

p\_c = < 2.22e-16, p\_sc = 0.0056747

# DLX3\_uc\_dTSS\_oPEAK

+ 13/33 (1/116), - 3/33 (41/116)

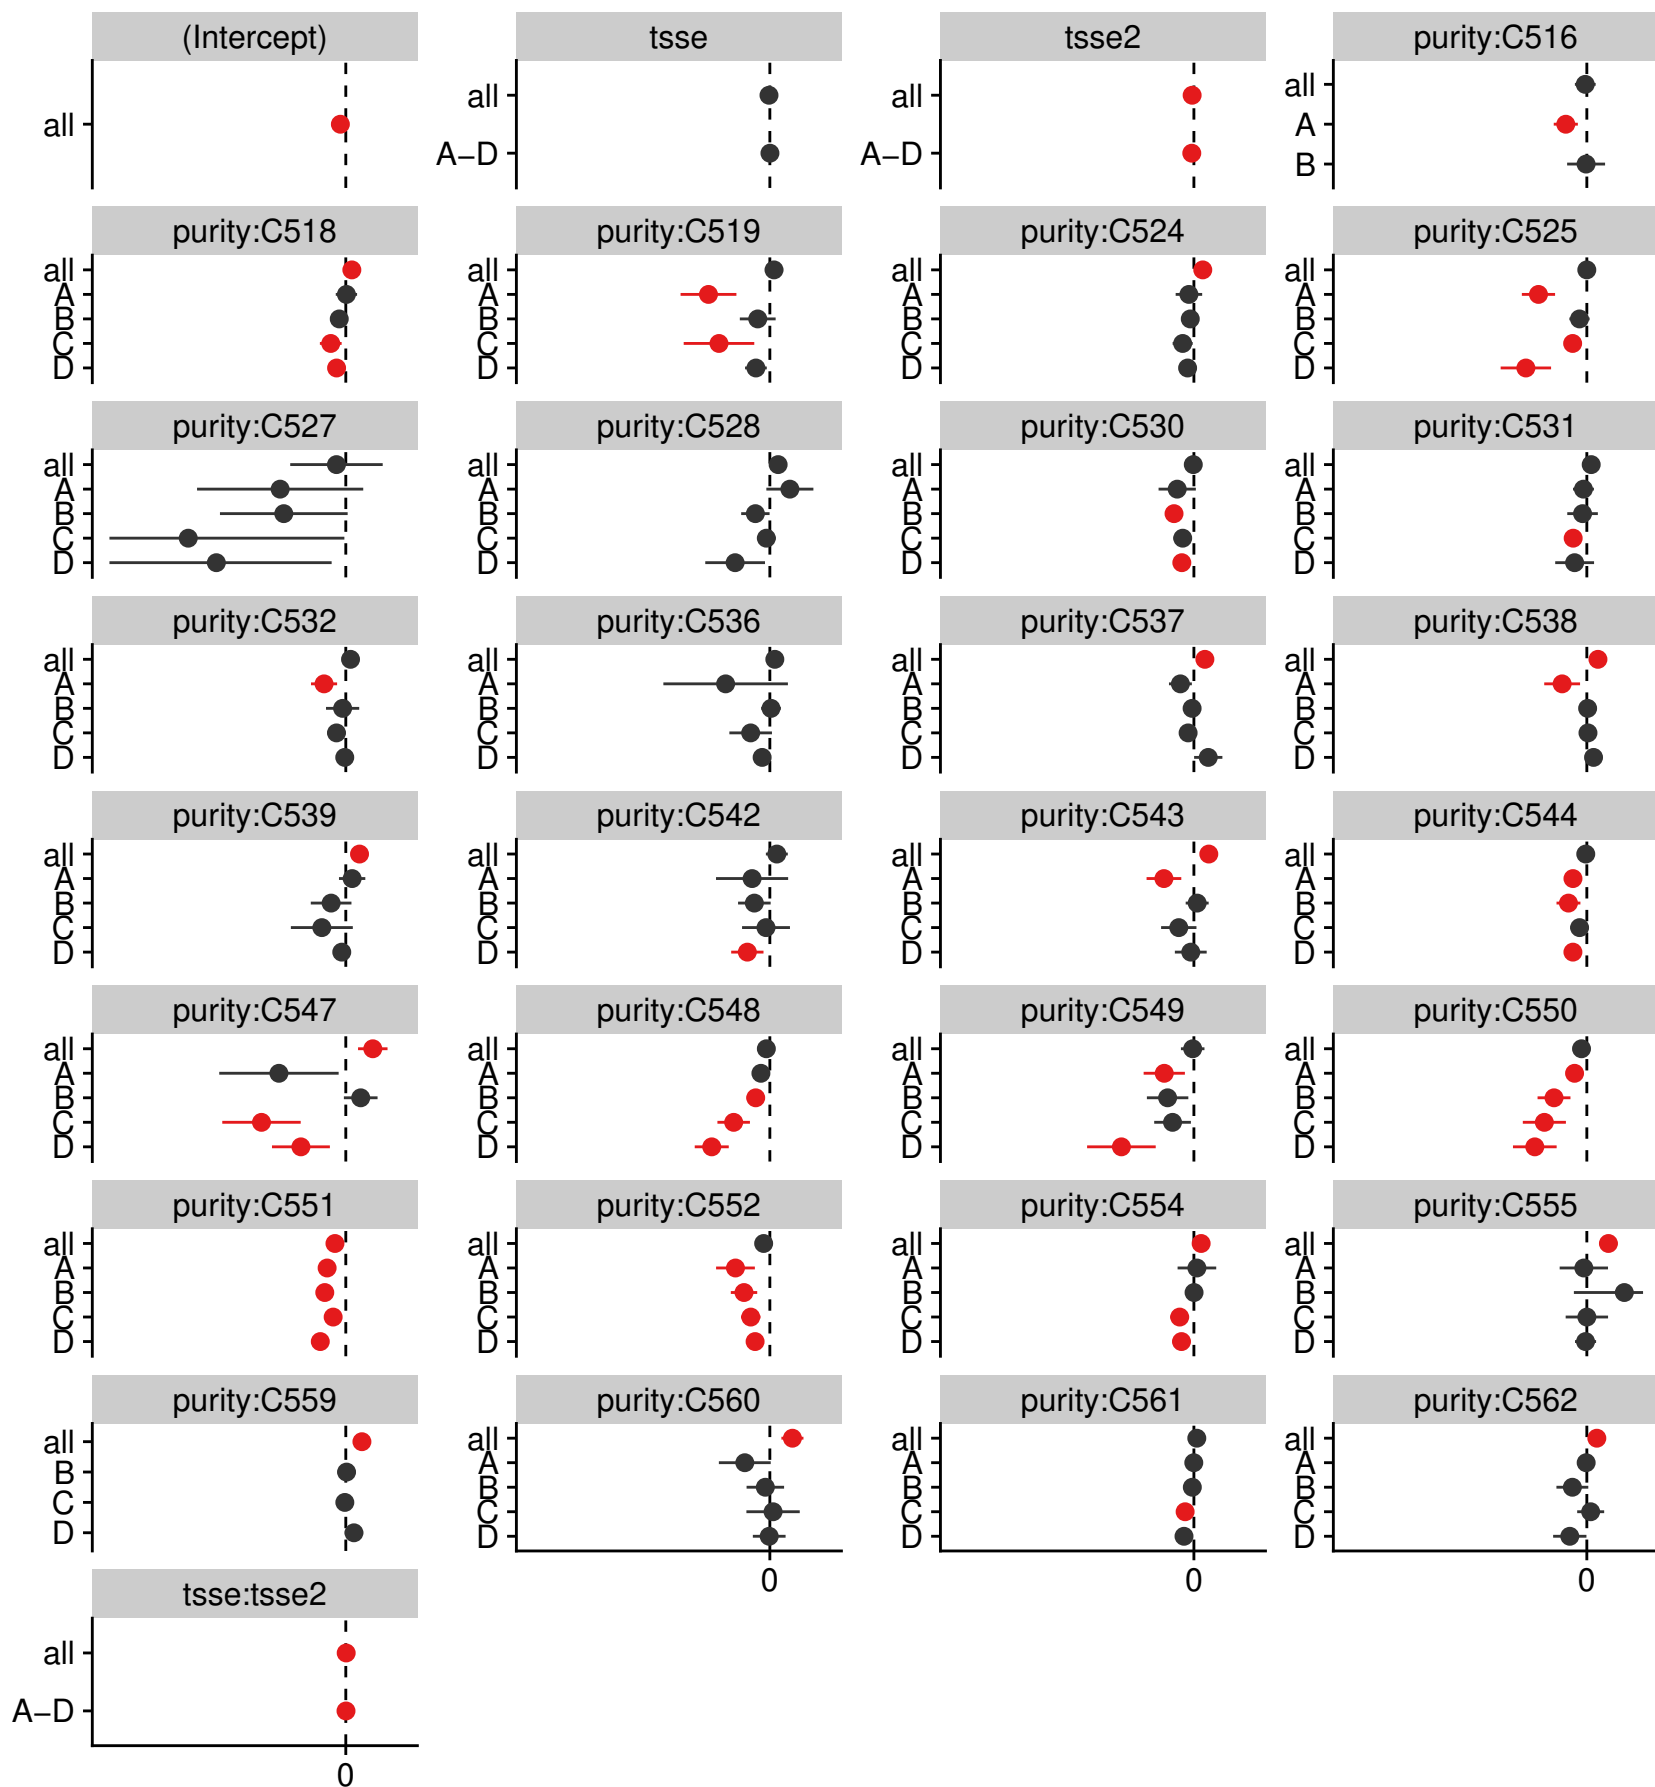

Coefficient

p\_c = < 2.22e-16, p\_sc = 0.1284

# DLX3\_uc\_pTSS\_nPEAK

+ 10/33 (1/116), - 5/33 (41/116)

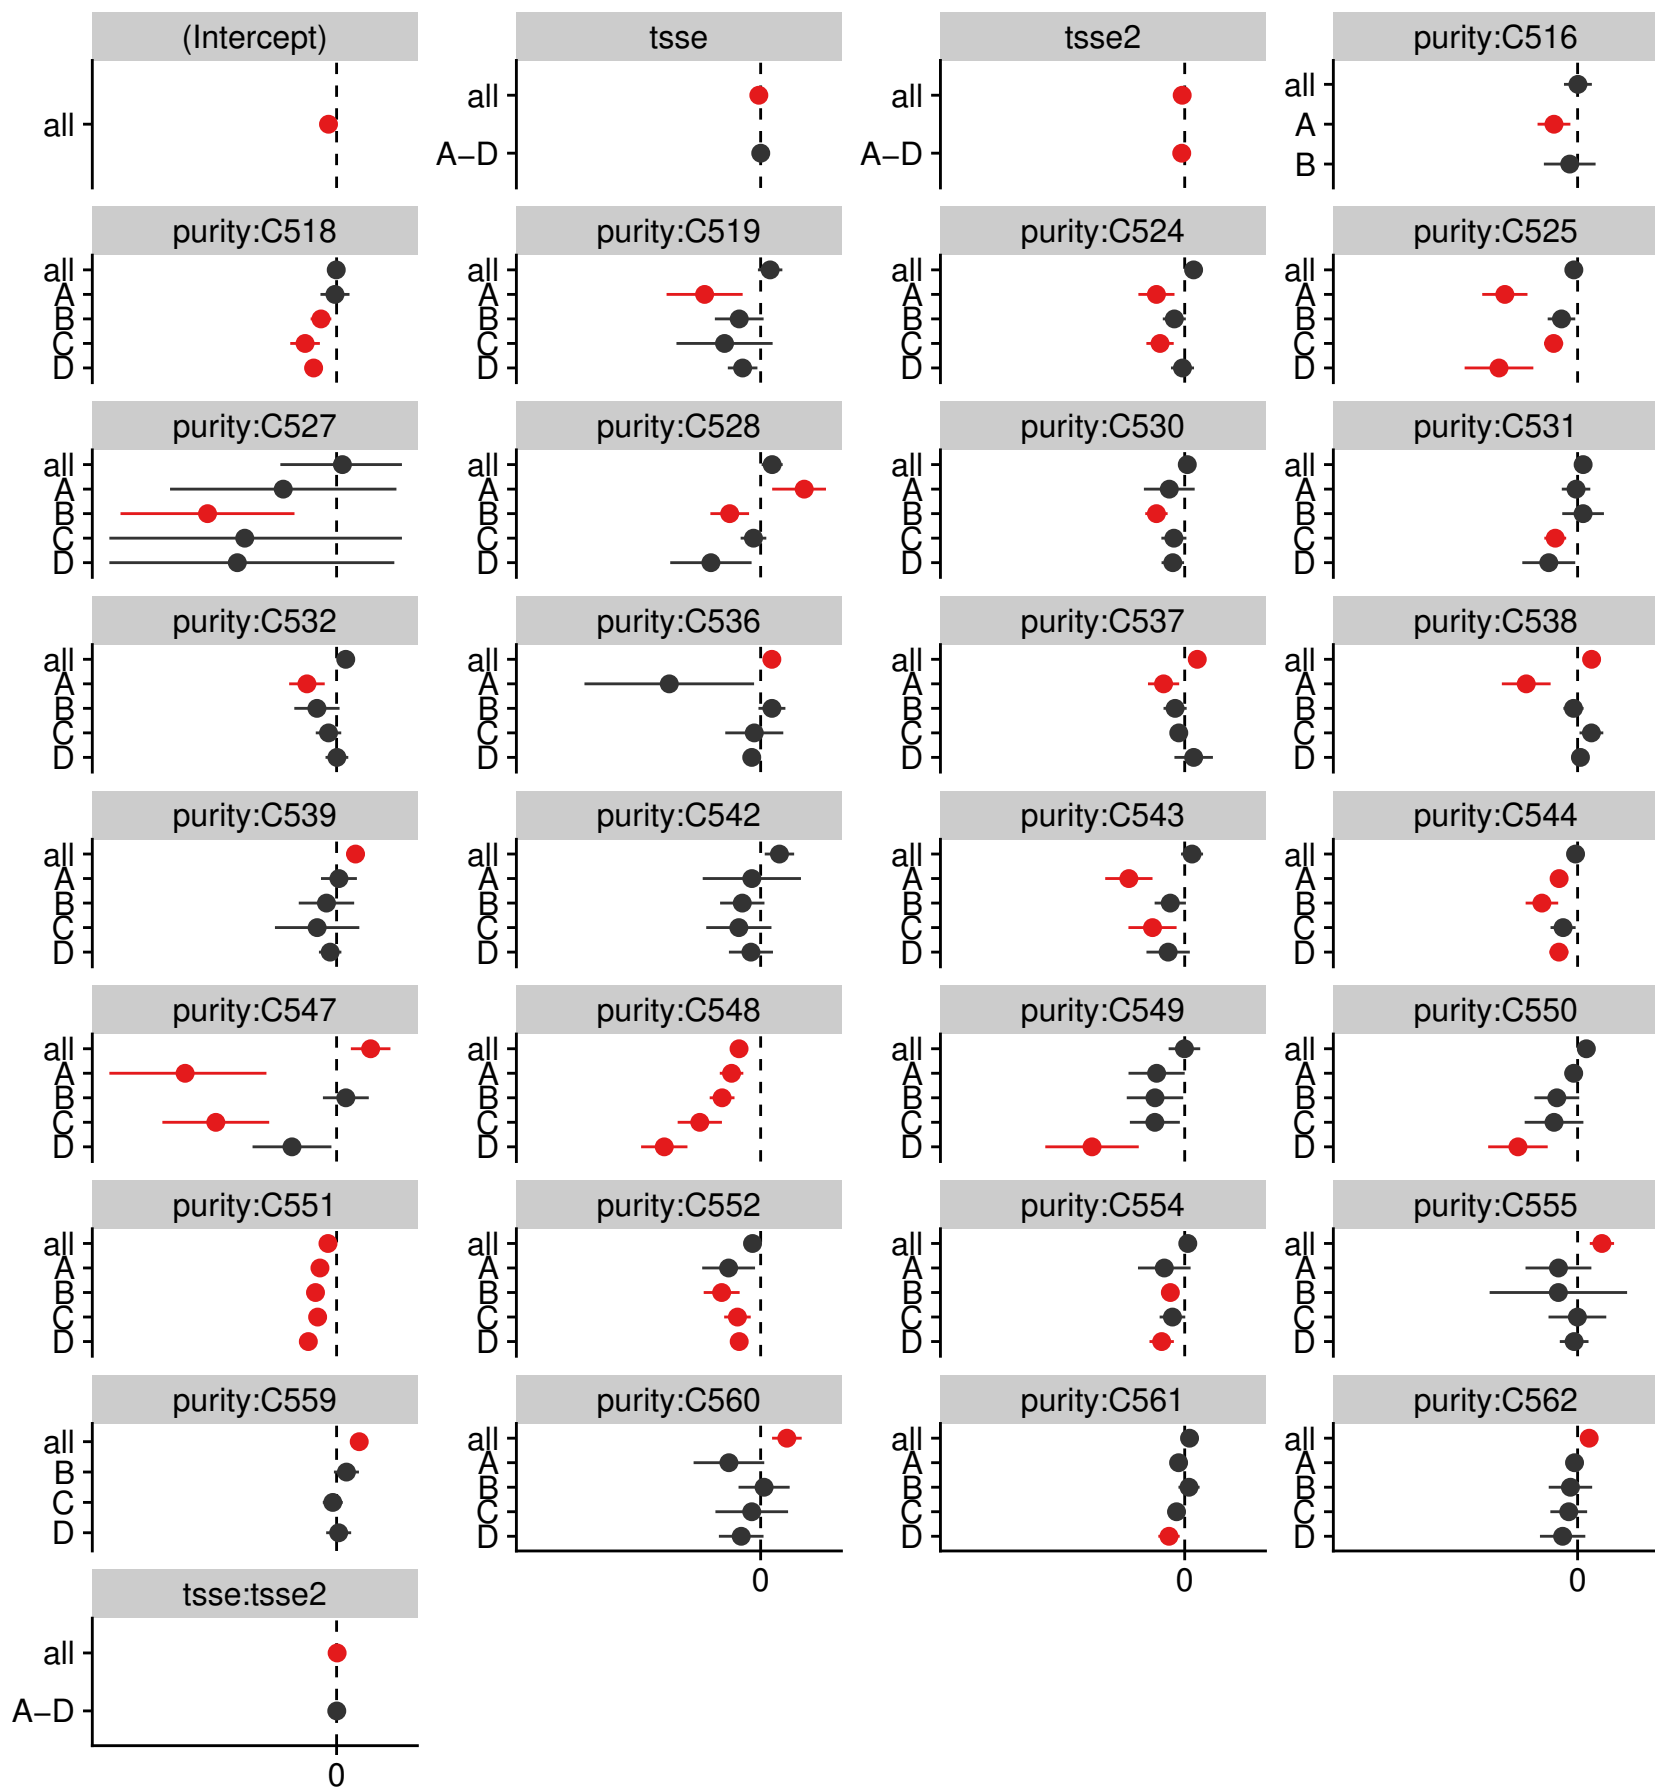

Coefficient

p\_c = < 2.22e-16, p\_sc = 0.7374

# DLX5\_uc\_dTSS\_nPEAK

+ 13/33 (2/116), - 2/33 (34/116)

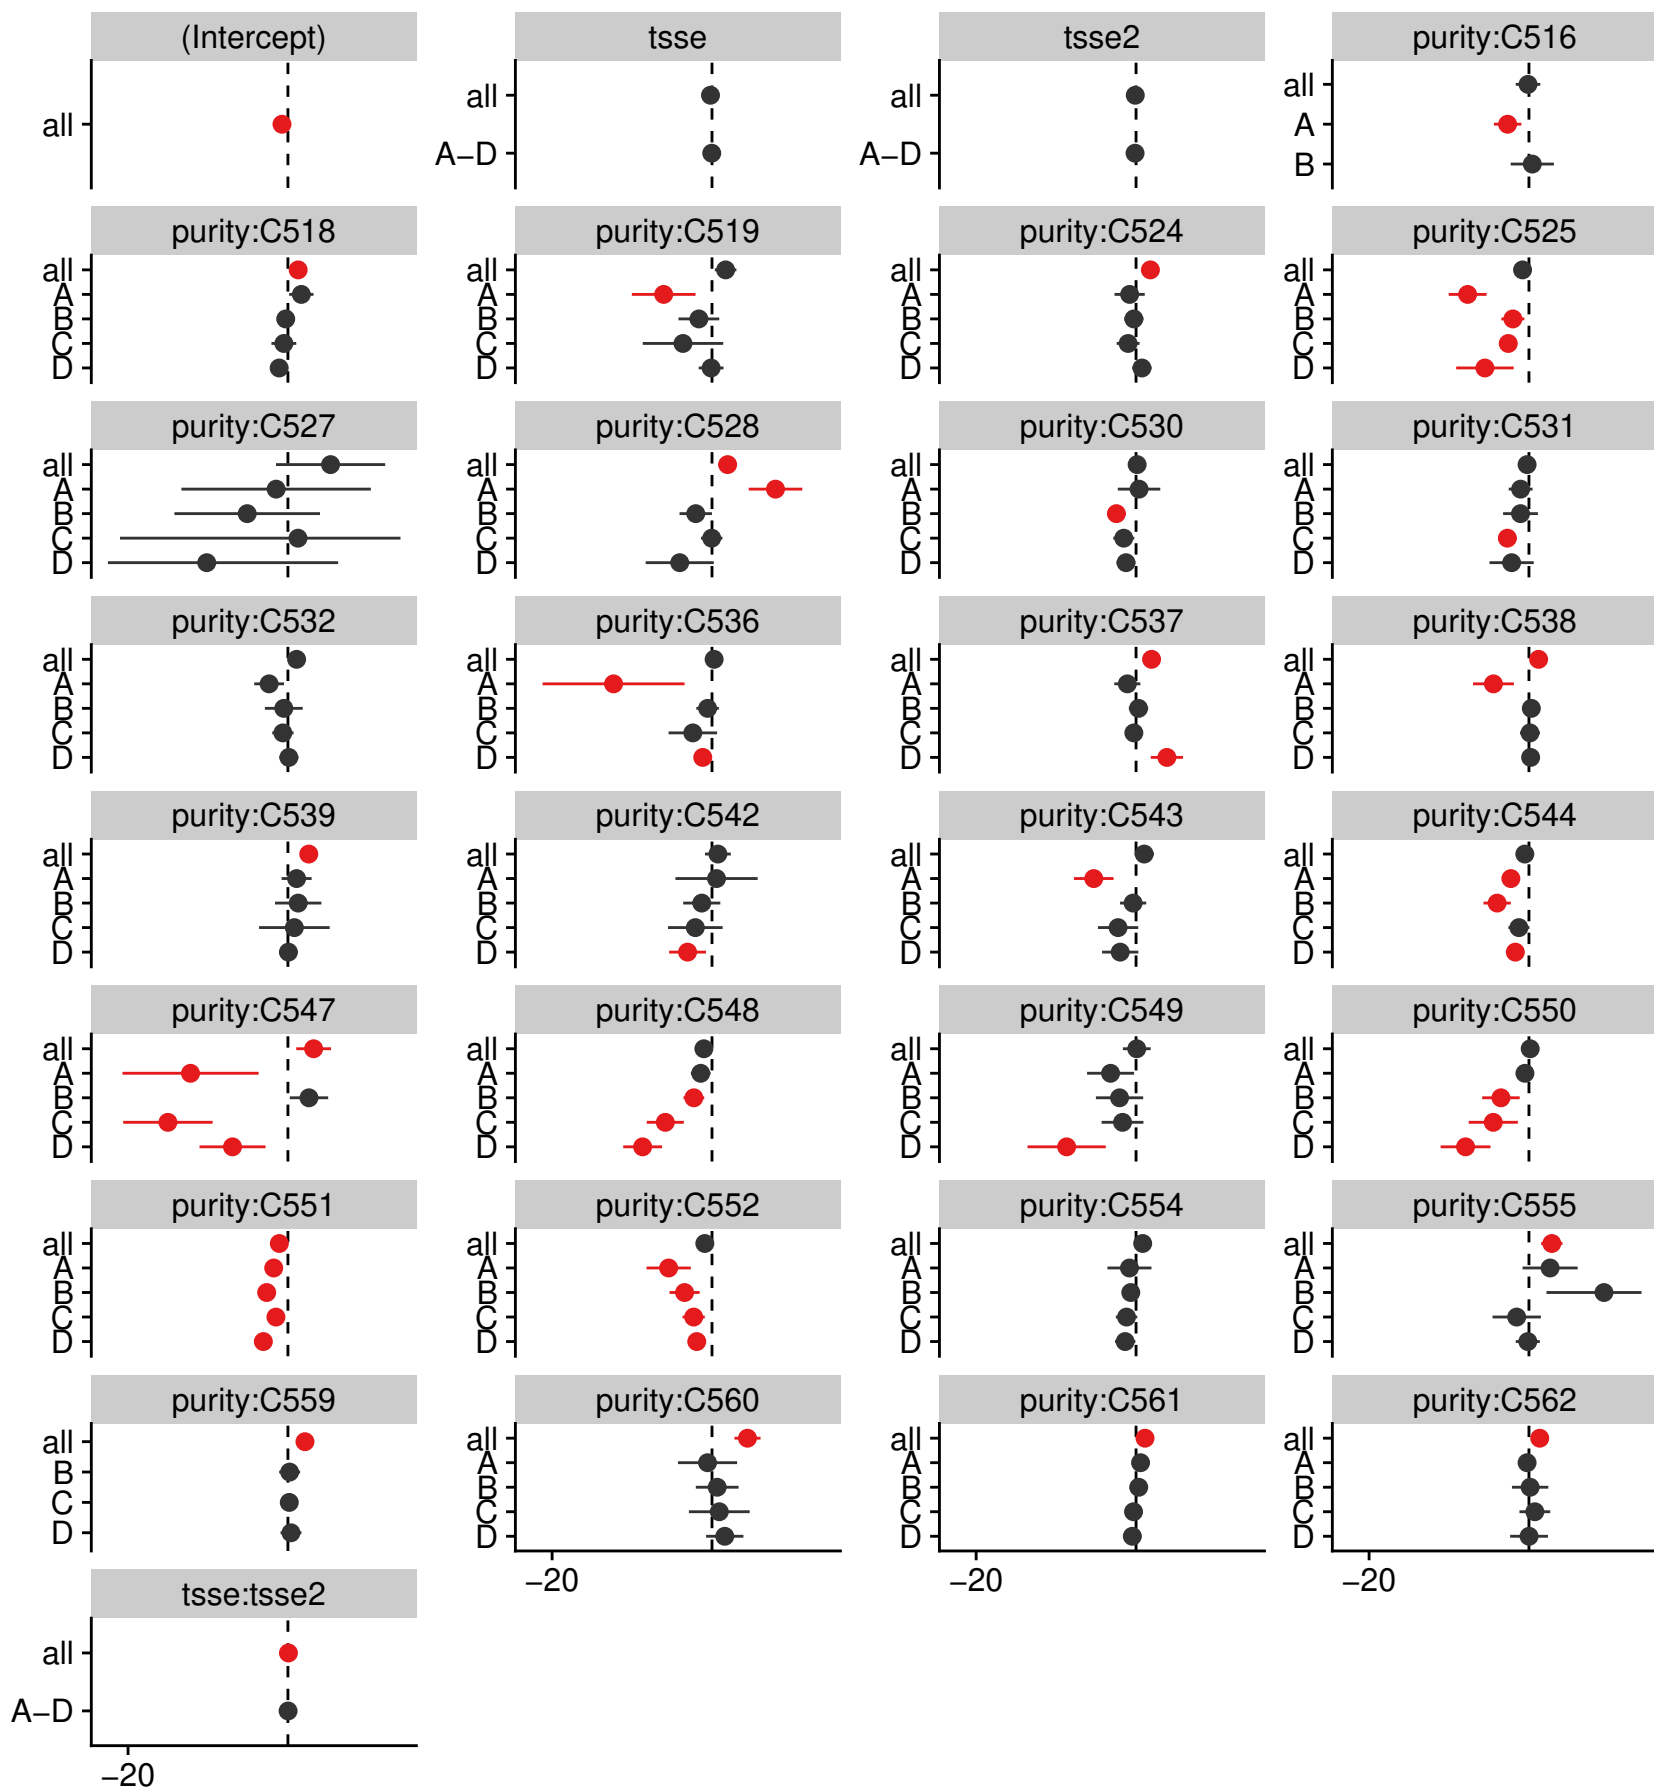

Coefficient

p\_c = < 2.22e-16, p\_sc = 3.852e-06

# DLX5\_uc\_dTSS\_oPEAK

+ 11/33 (2/116), - 3/33 (30/116)

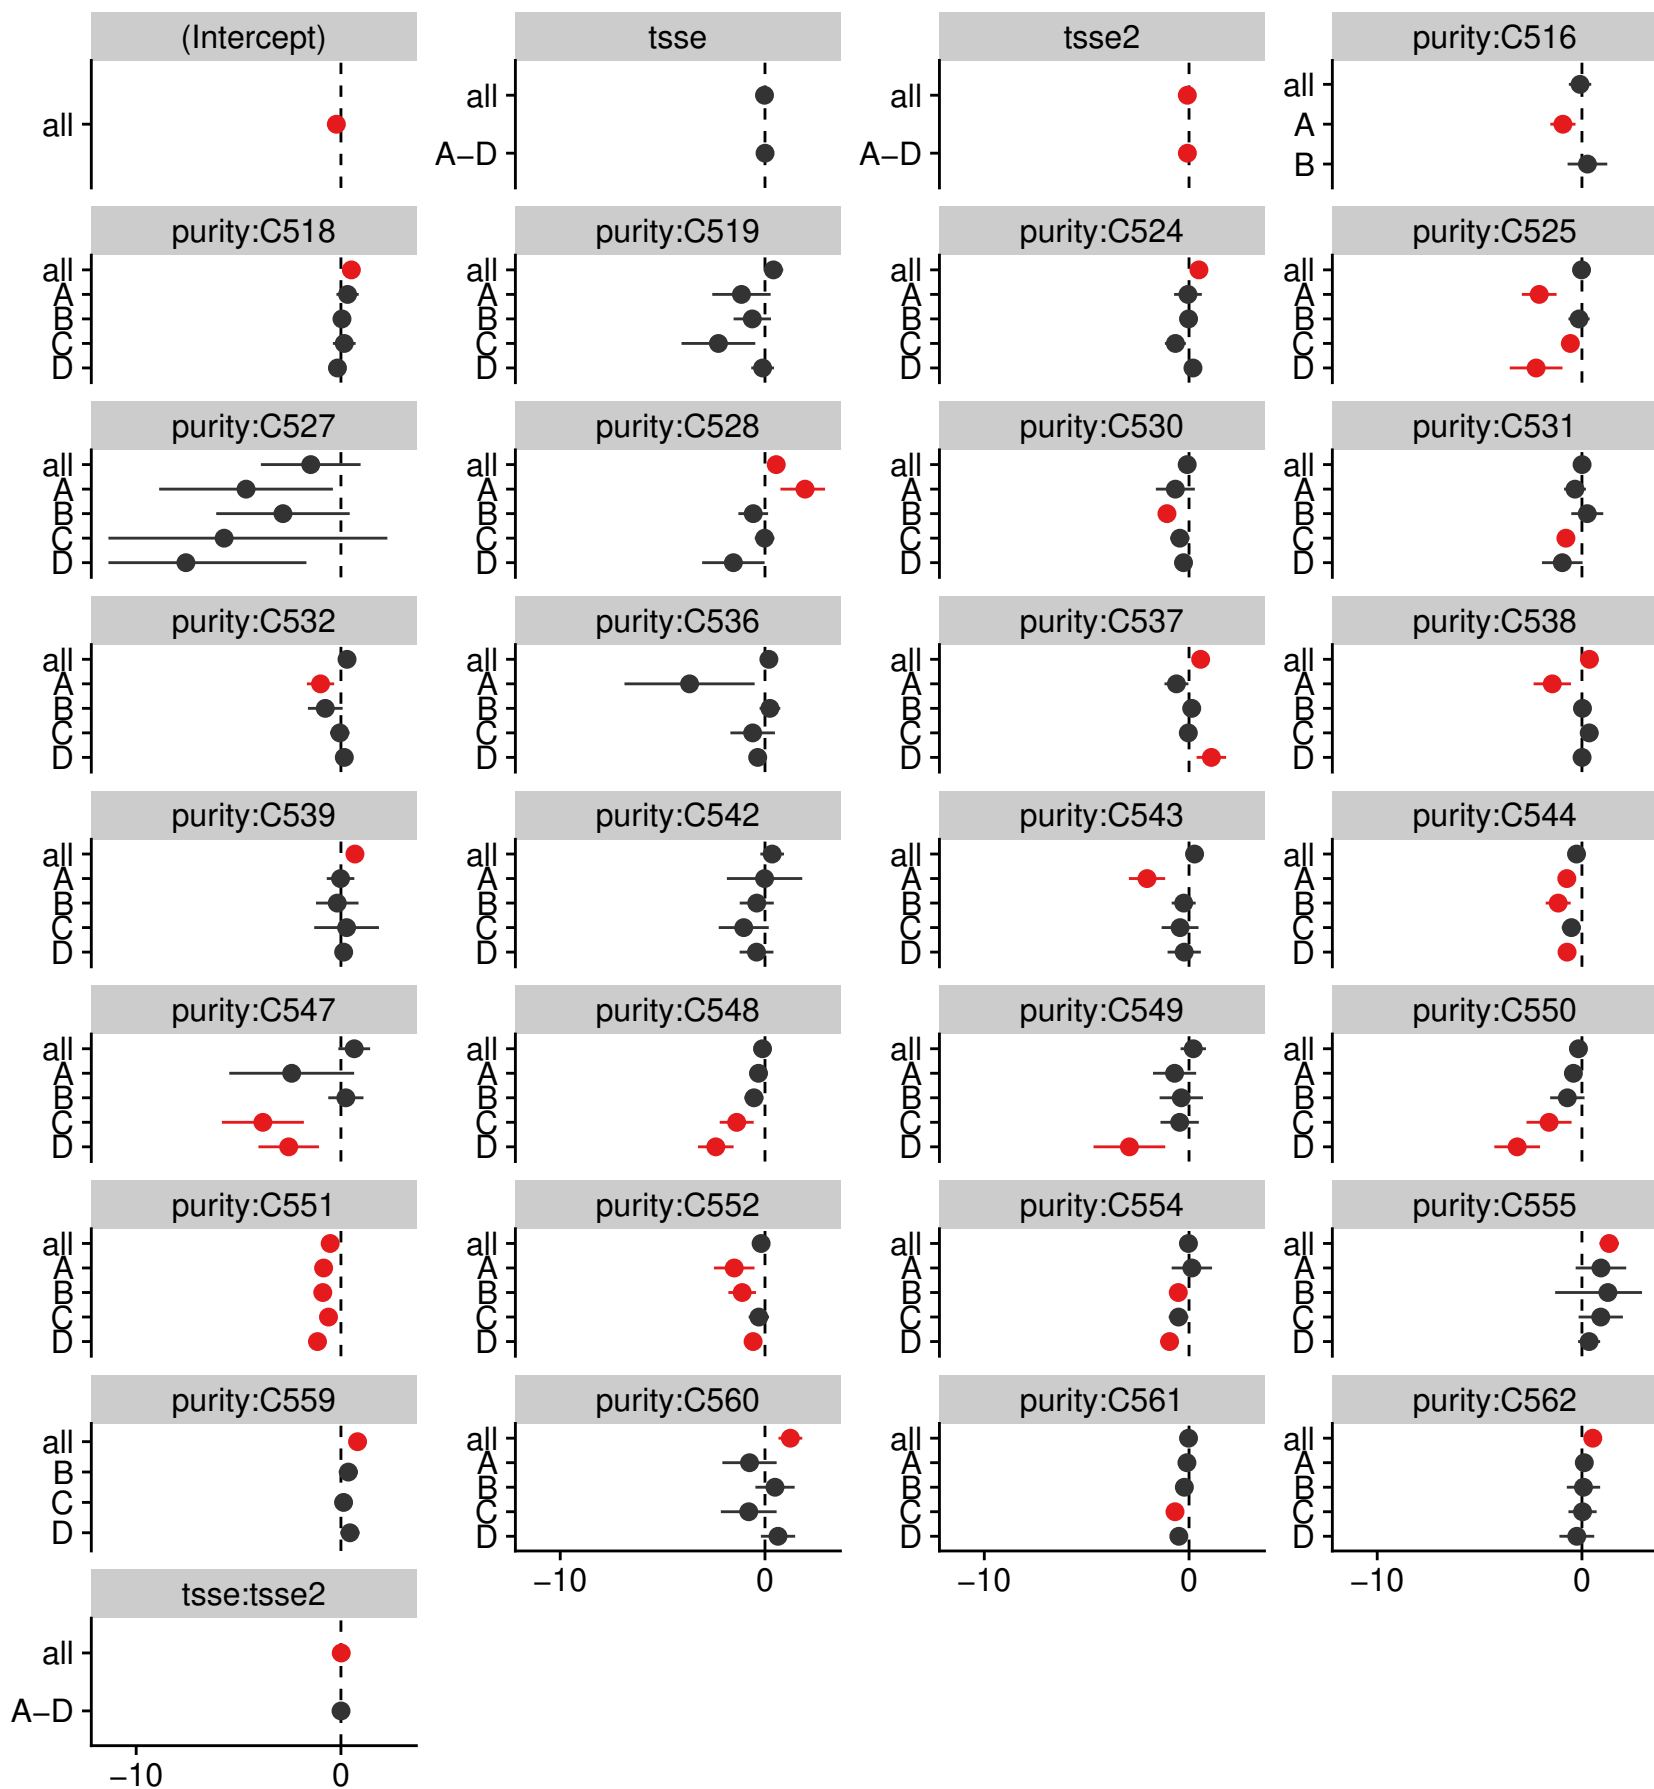

Coefficient

p\_c = < 2.22e-16, p\_sc = 2.053e-05

# DMRT2\_uc\_dTSS\_nPEAK

+ 13/33 (2/116), - 3/33 (27/116)

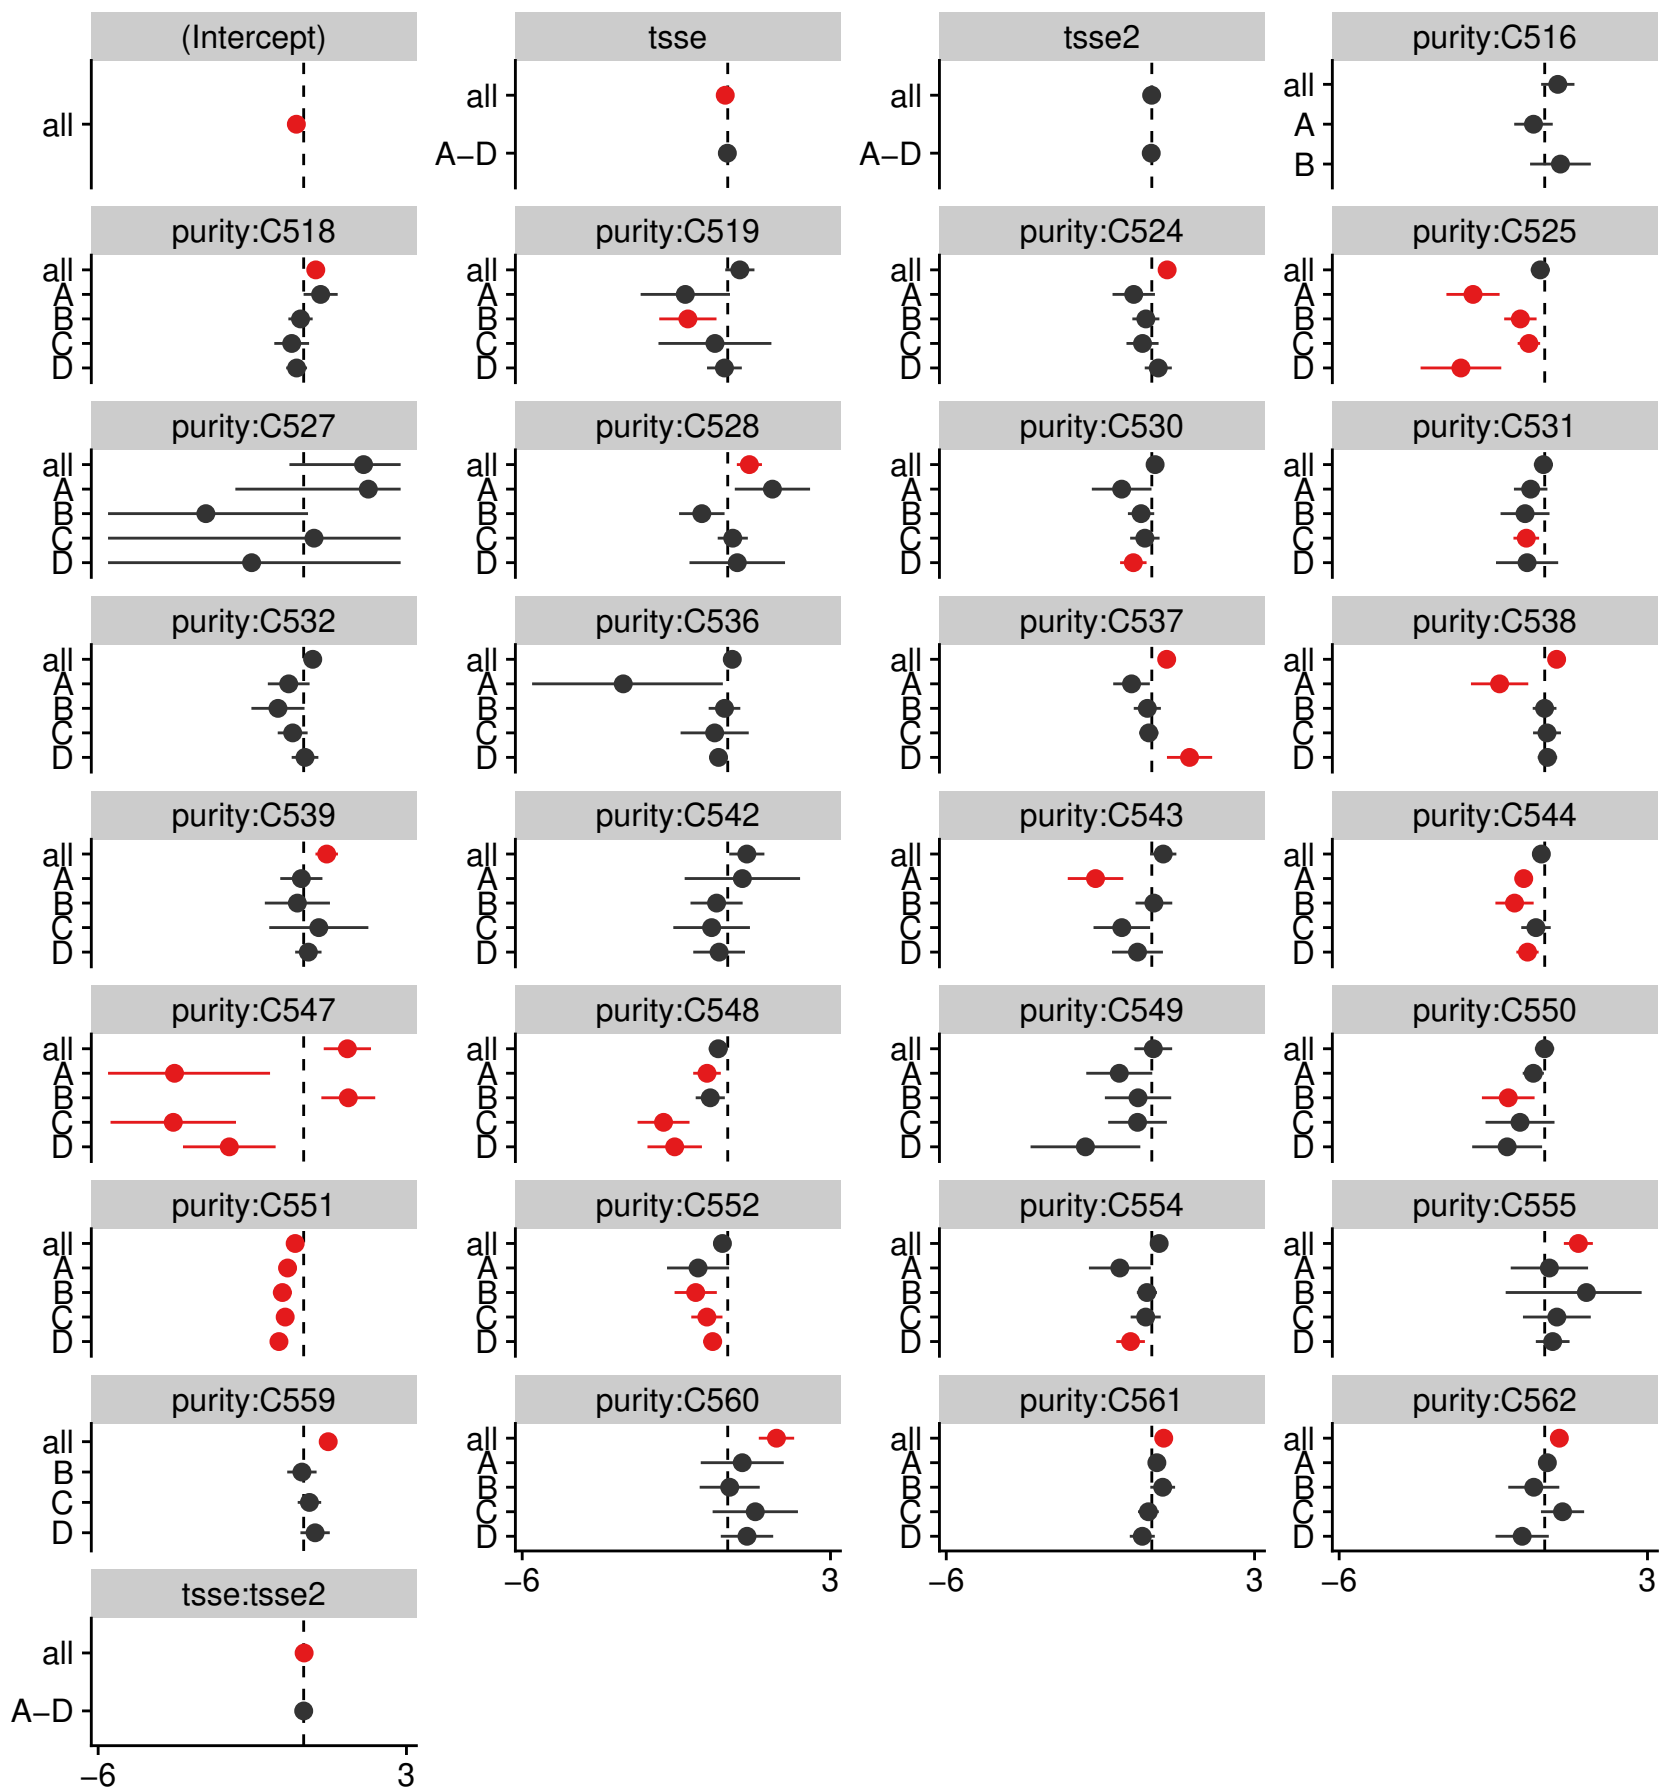

Coefficient

$p_c = < 2.22e-16$ ,  $p_{sc} = 0.089515$

# DMRTC2\_uc\_cTSS\_nPEAK

+ 15/33 (2/116), - 4/33 (23/116)

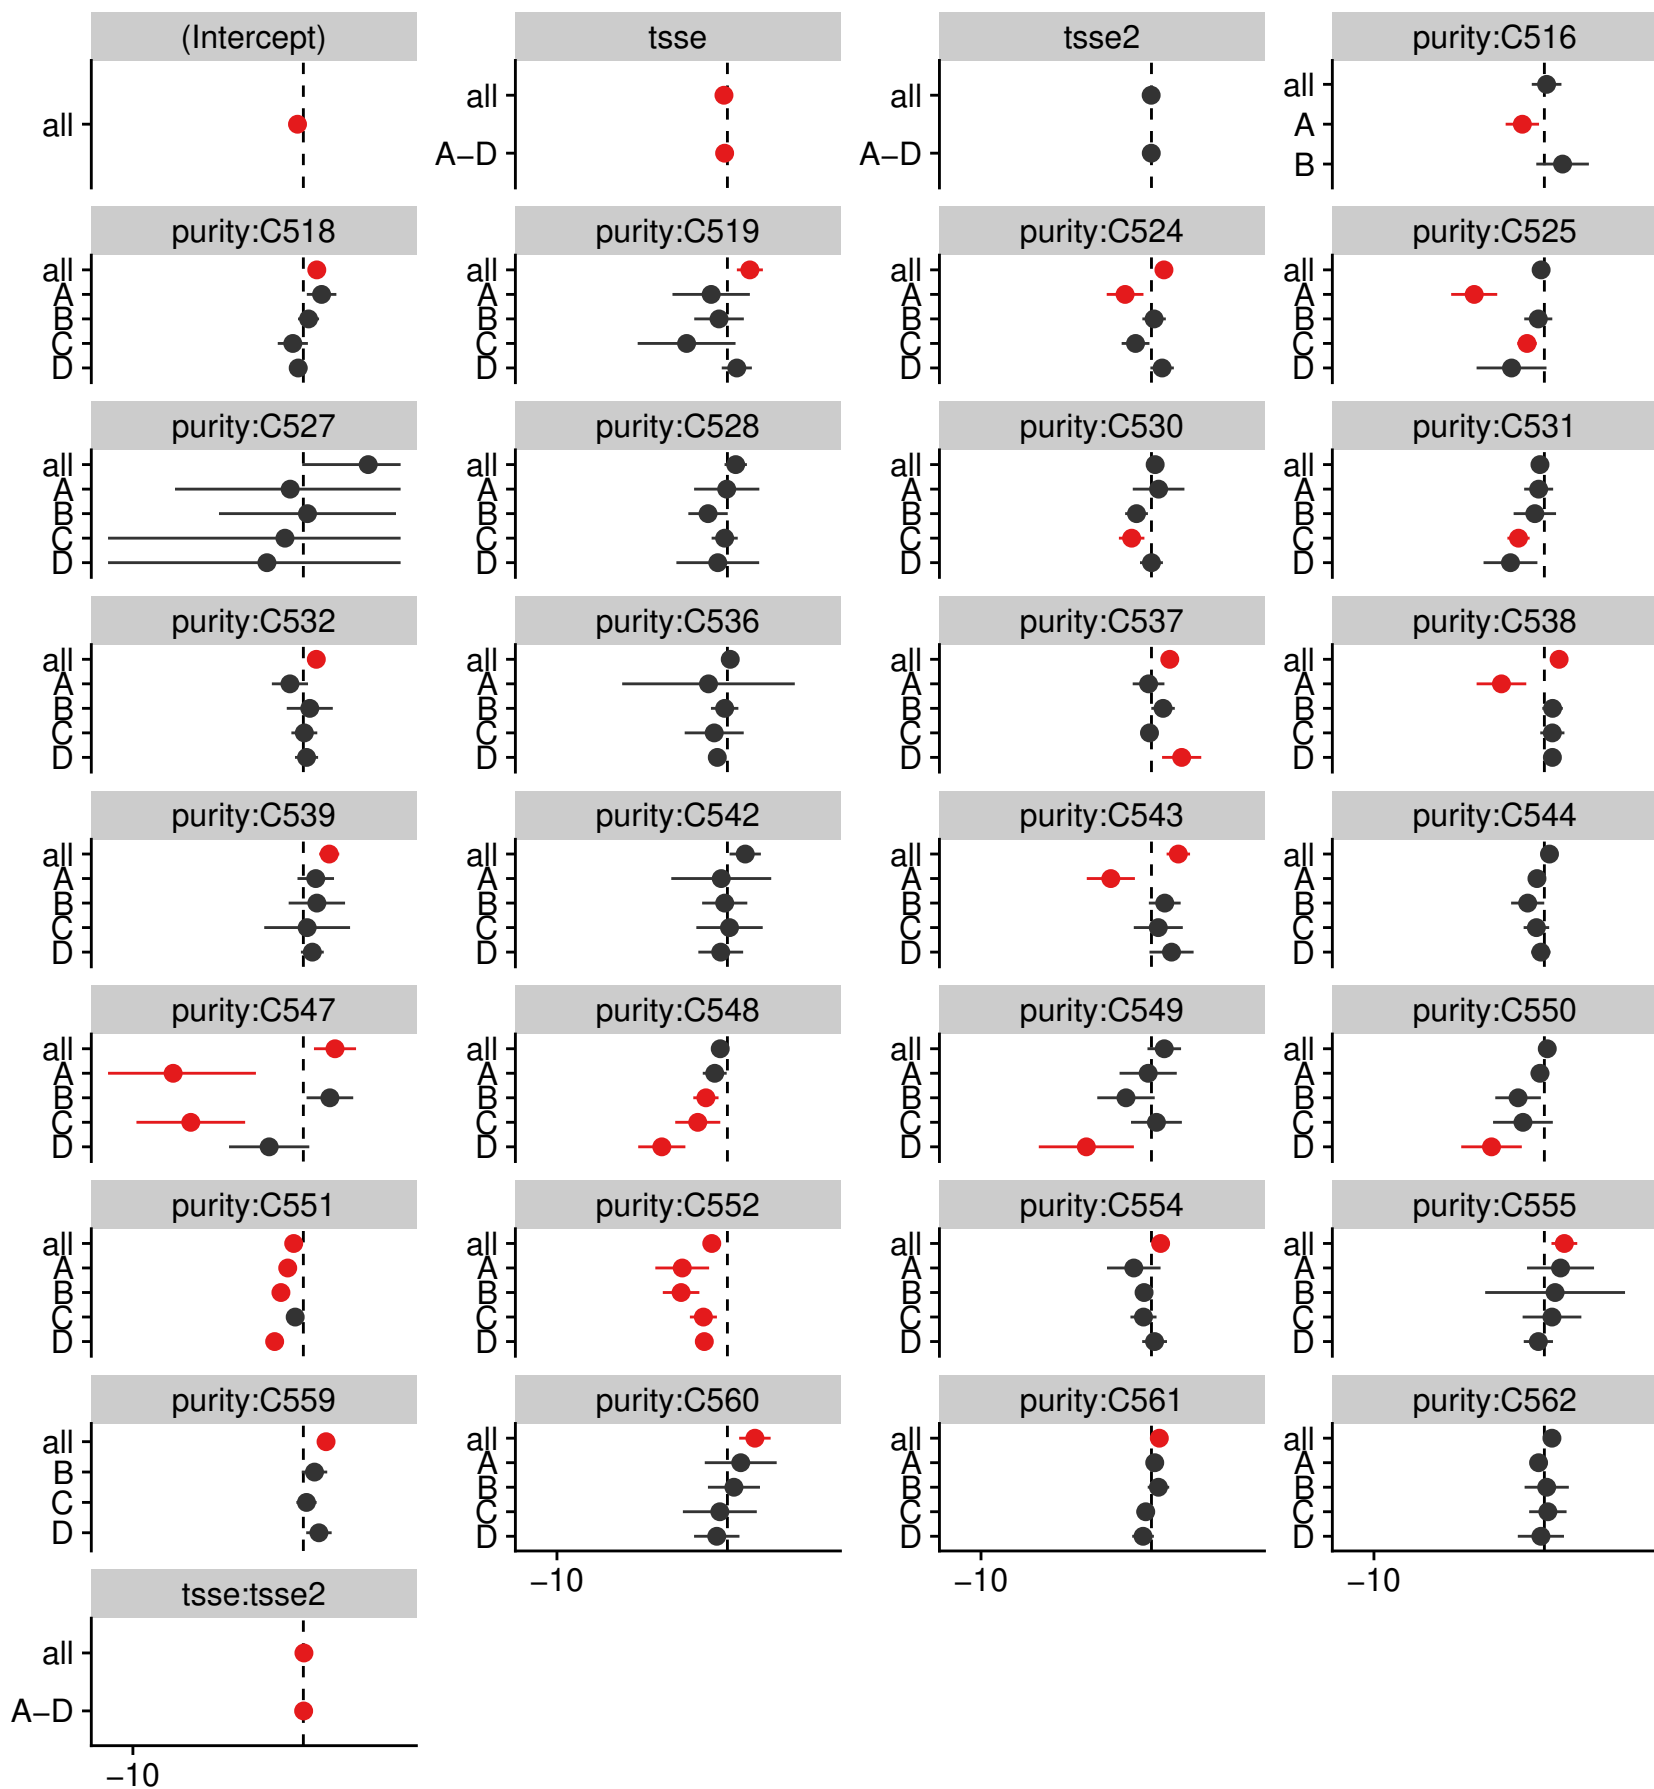

p\_c = < 2.22e-16, p\_sc = 3.3929e-05



# ENCODE\_CTCF\_sites\_COLON

+ 7/33 (20/116), - 10/33 (40/116)

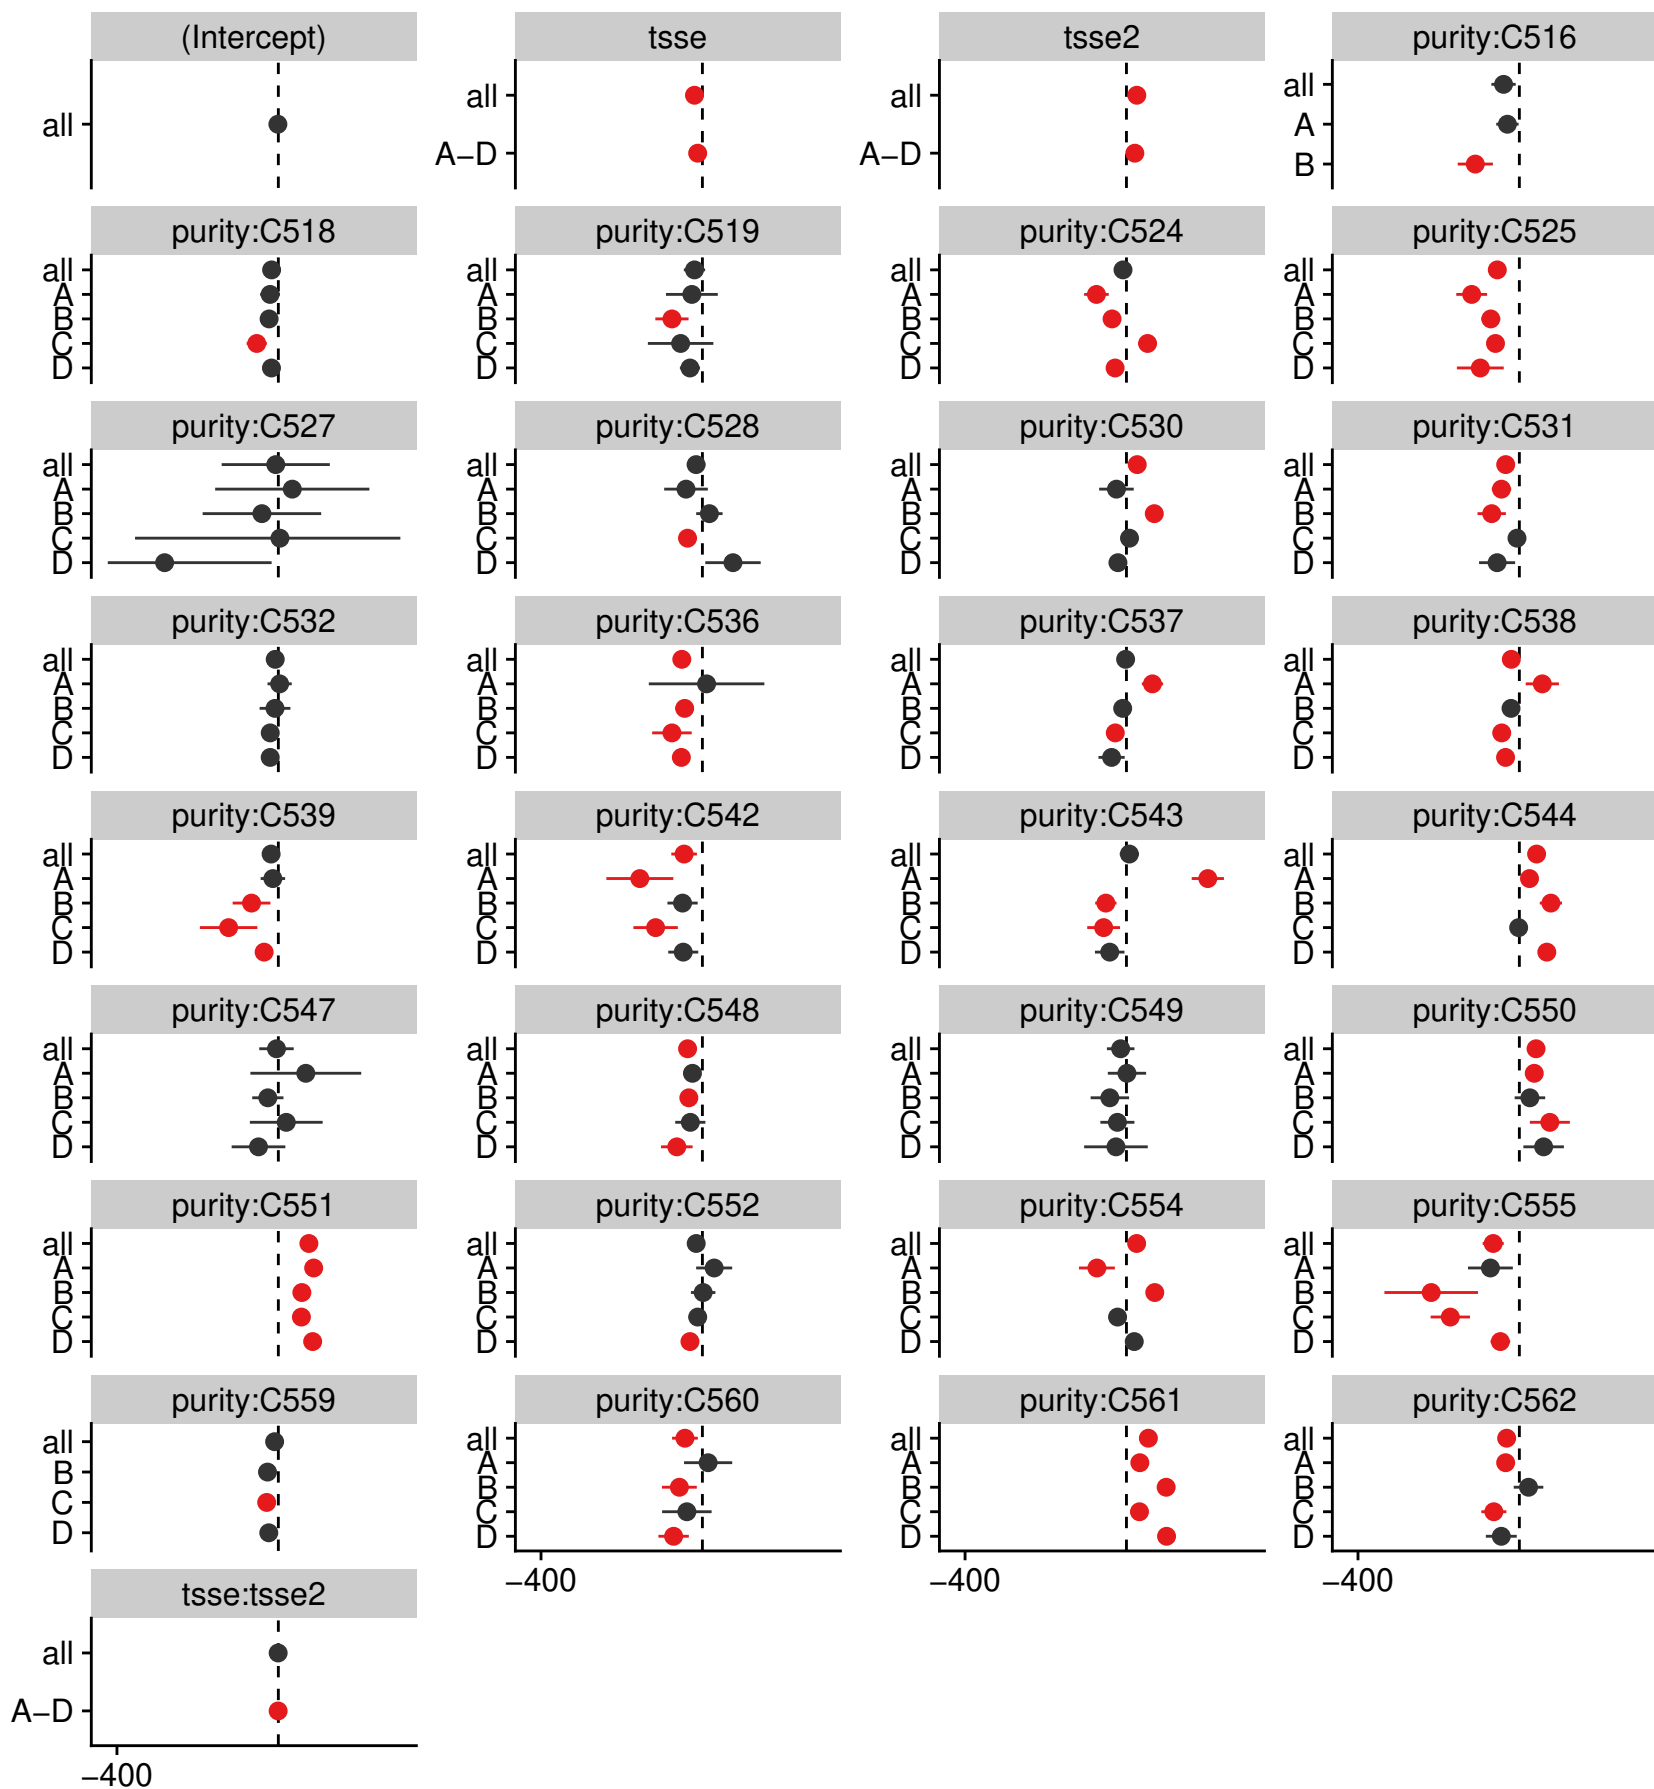

Coefficient

p\_c = < 2.22e-16, p\_sc = < 2.22e-16

# ENCODE CTCF\_sites COLON intergenic ctcf

+ 7/33 (21/116), - 13/33 (47/116)

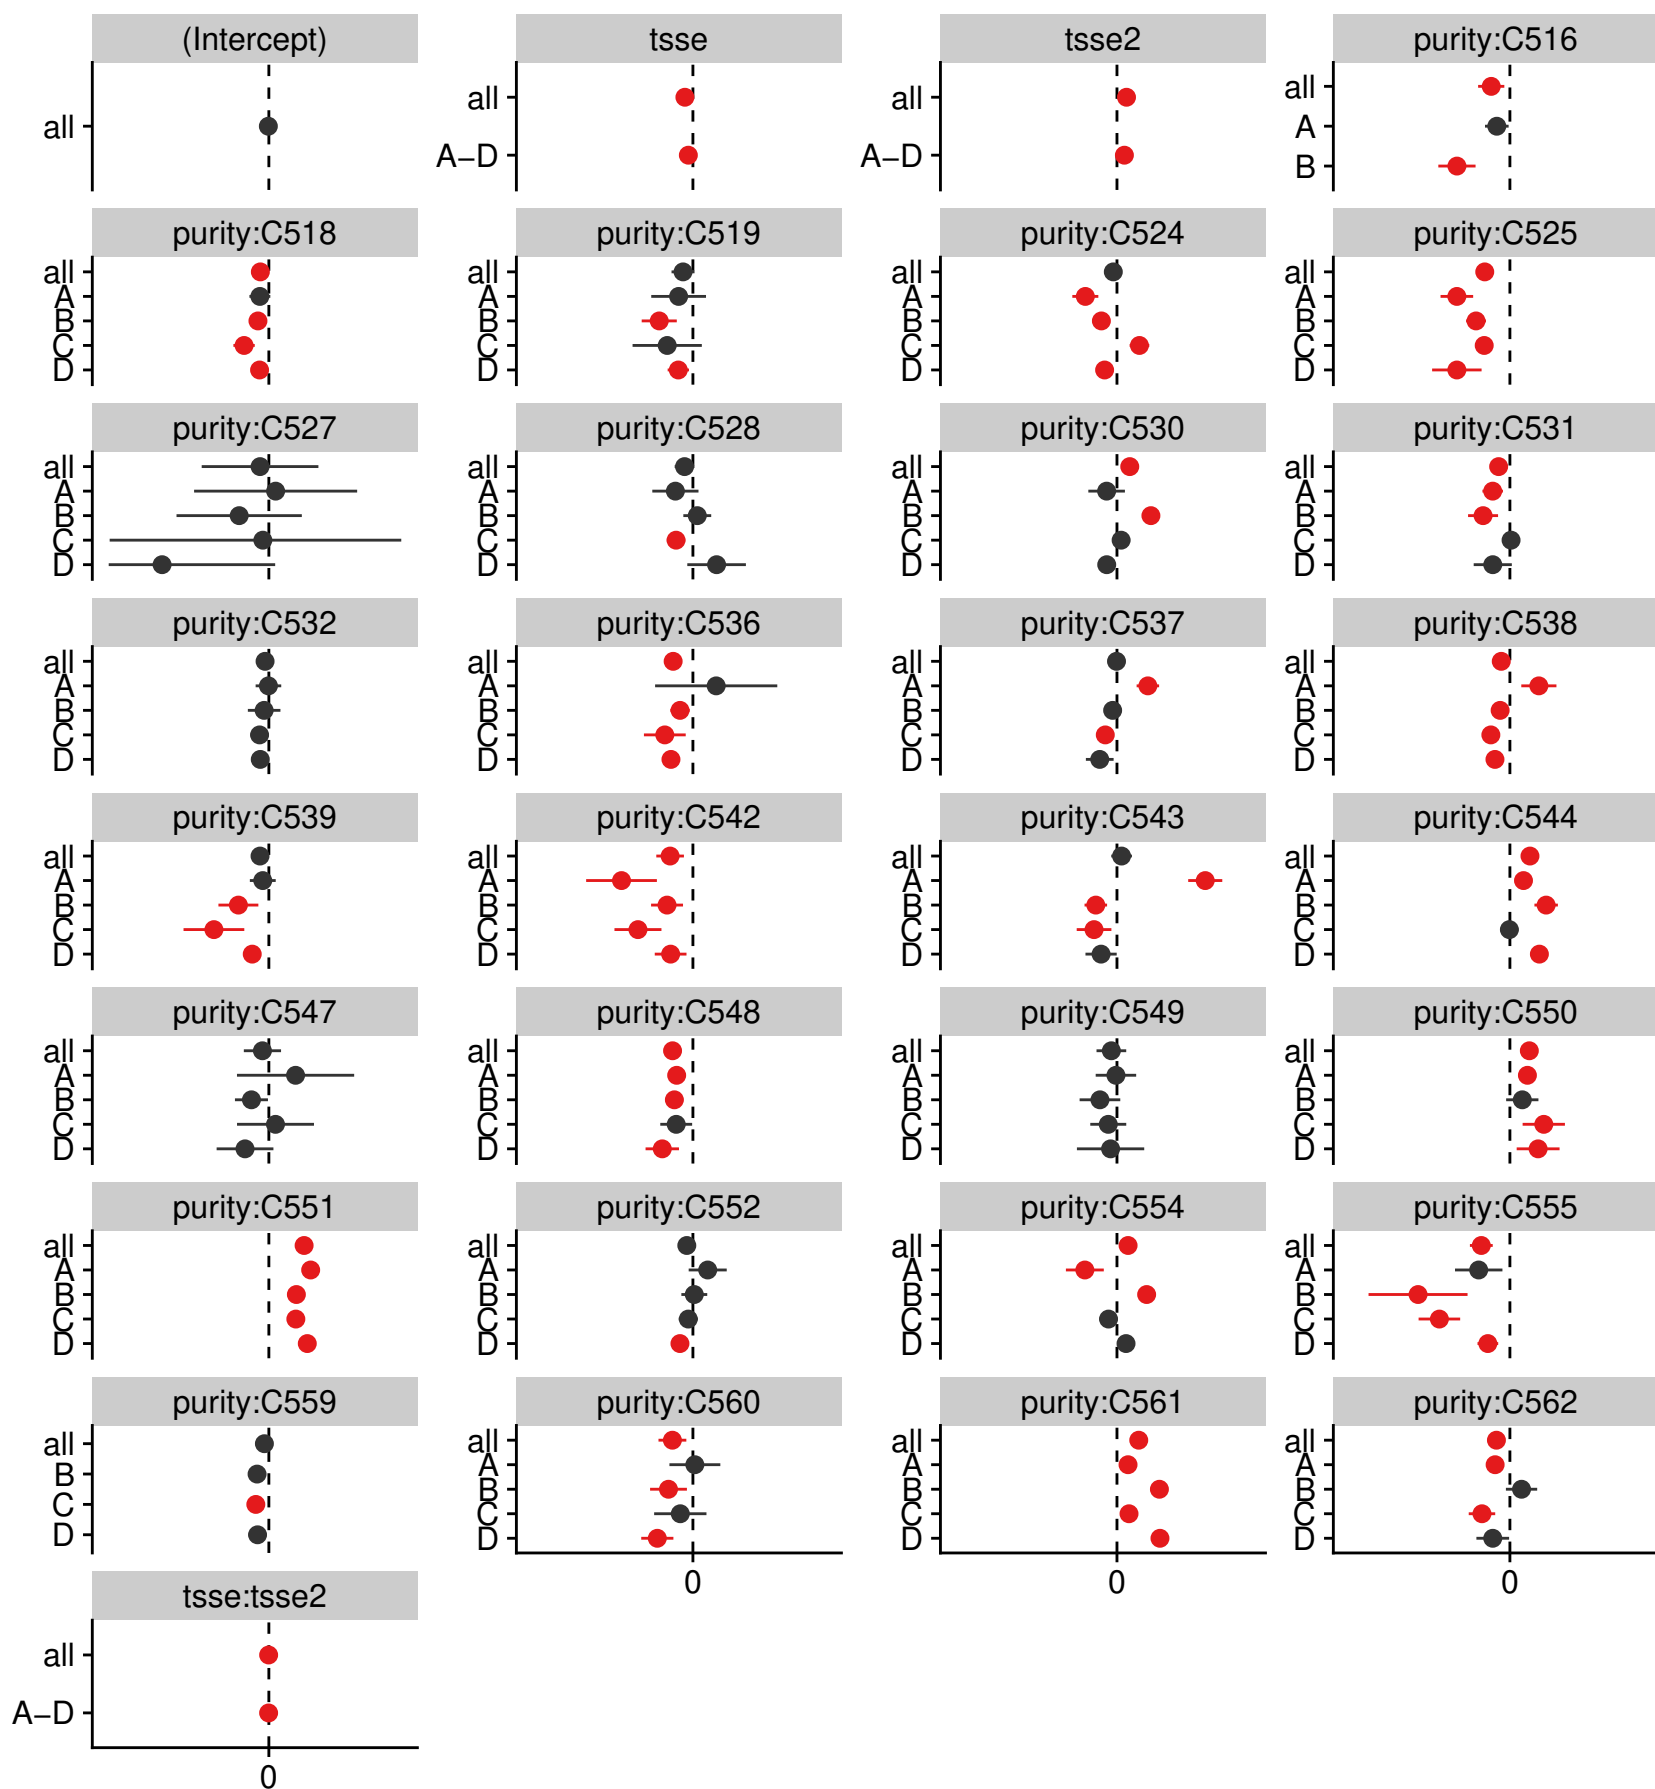

Coefficient

p\_c = < 2.22e-16, p\_sc = < 2.22e-16

# ENCODE\_CTCF\_sites\_COLON\_loop\_ctcf

+ 7/33 (20/116), - 13/33 (48/116)

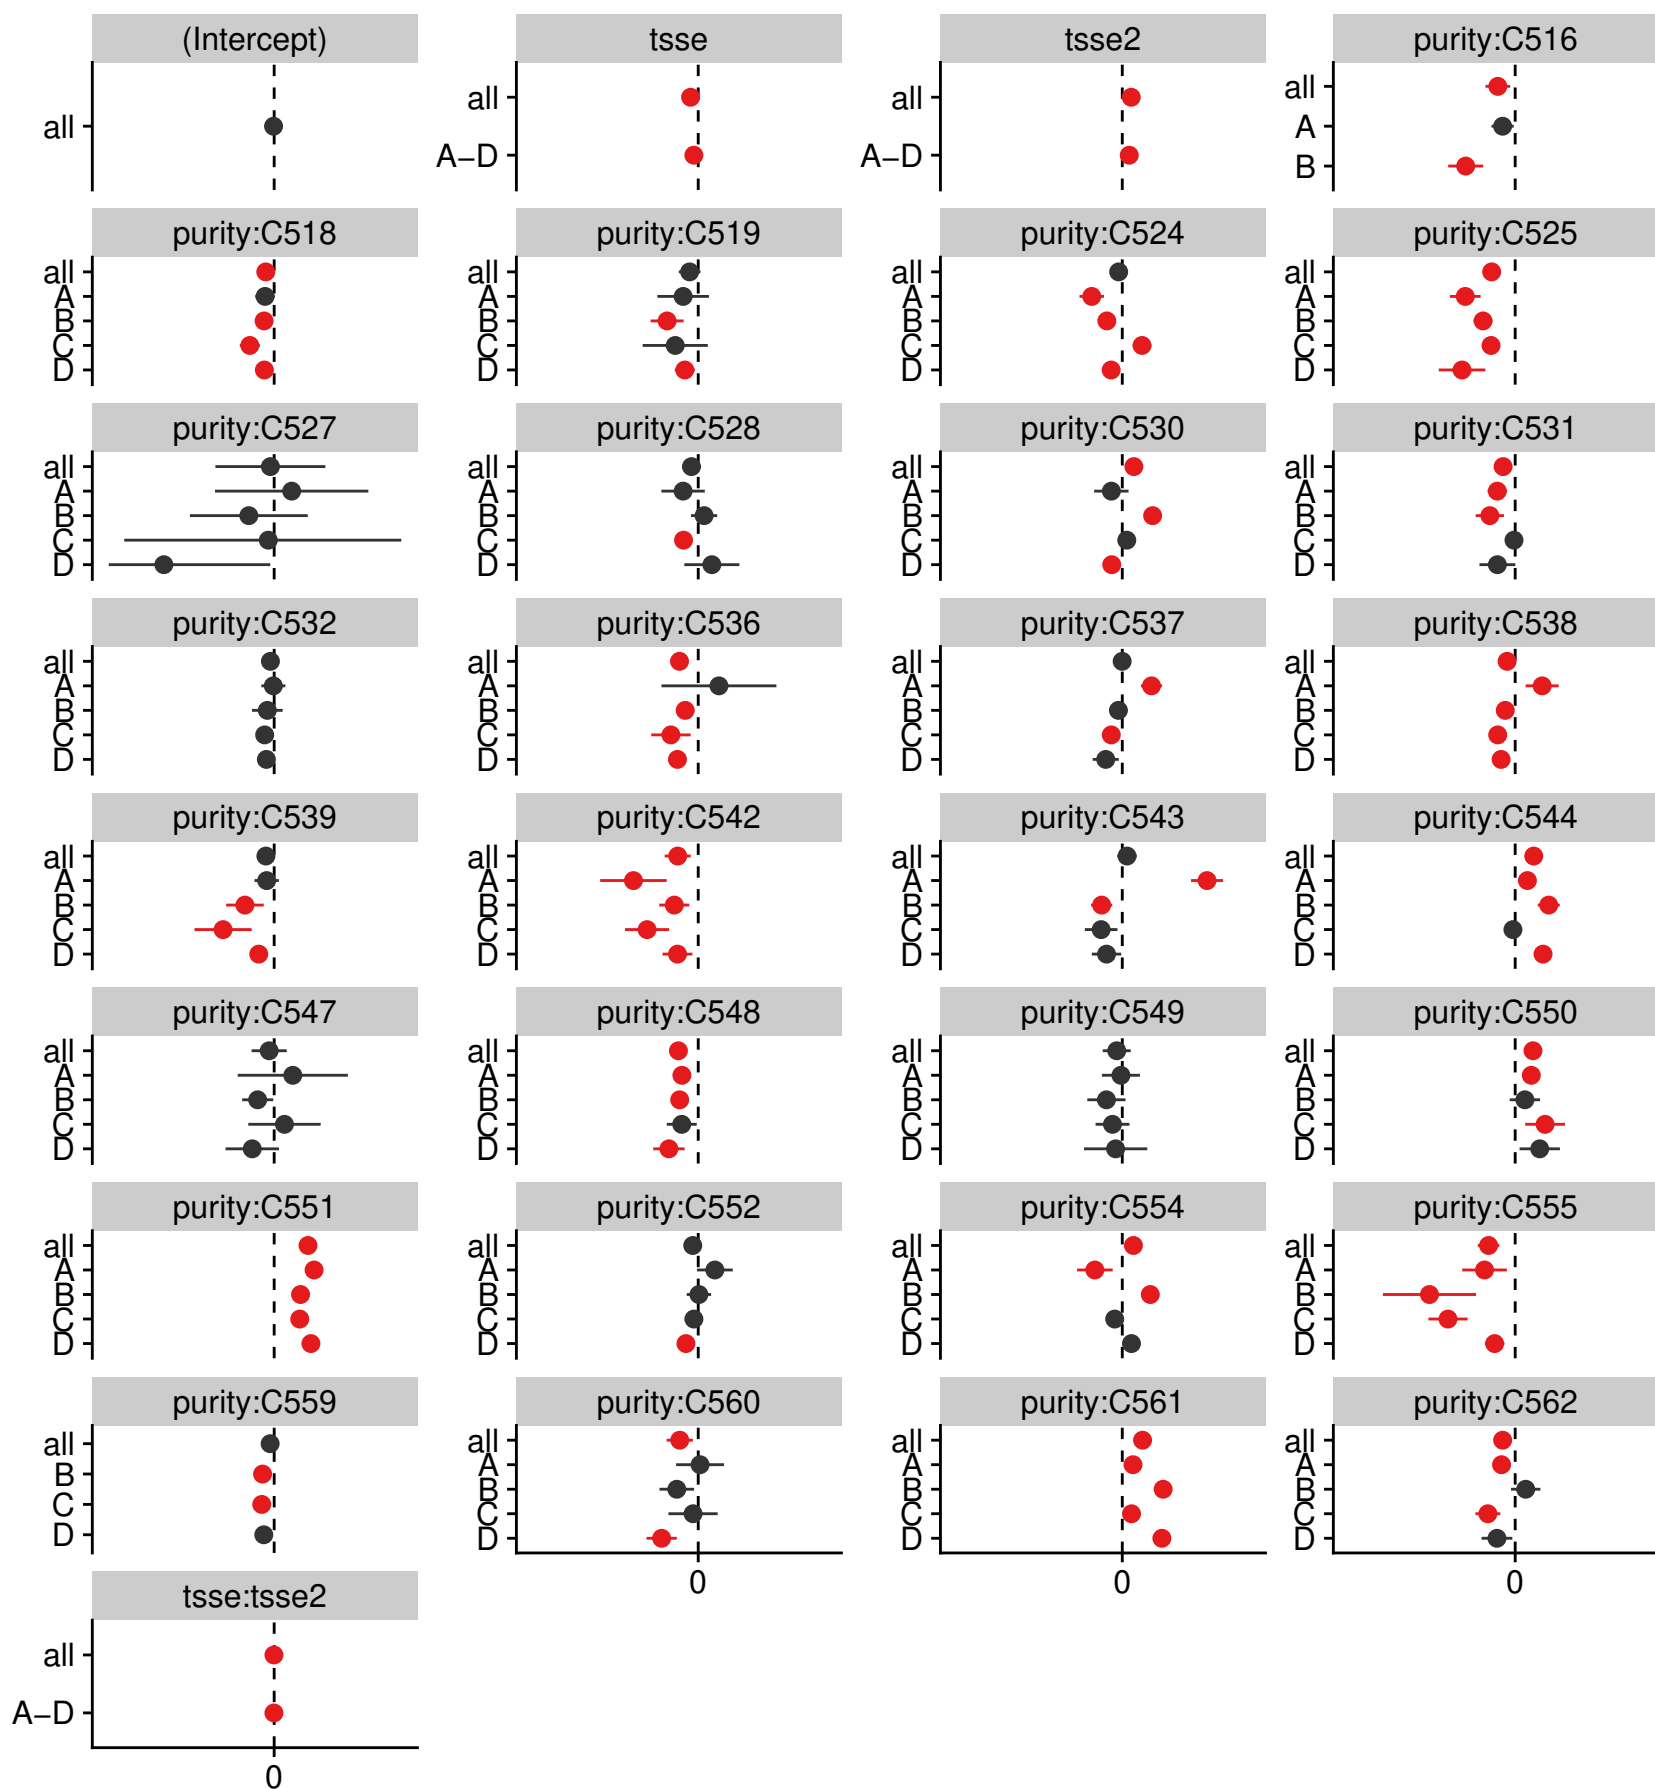

Coefficient

p\_c = < 2.22e-16, p\_sc = < 2.22e-16

# ENCODE\_CTCF\_sites\_COLON\_nonpromotor

+ 7/33 (20/116), - 13/33 (48/116)

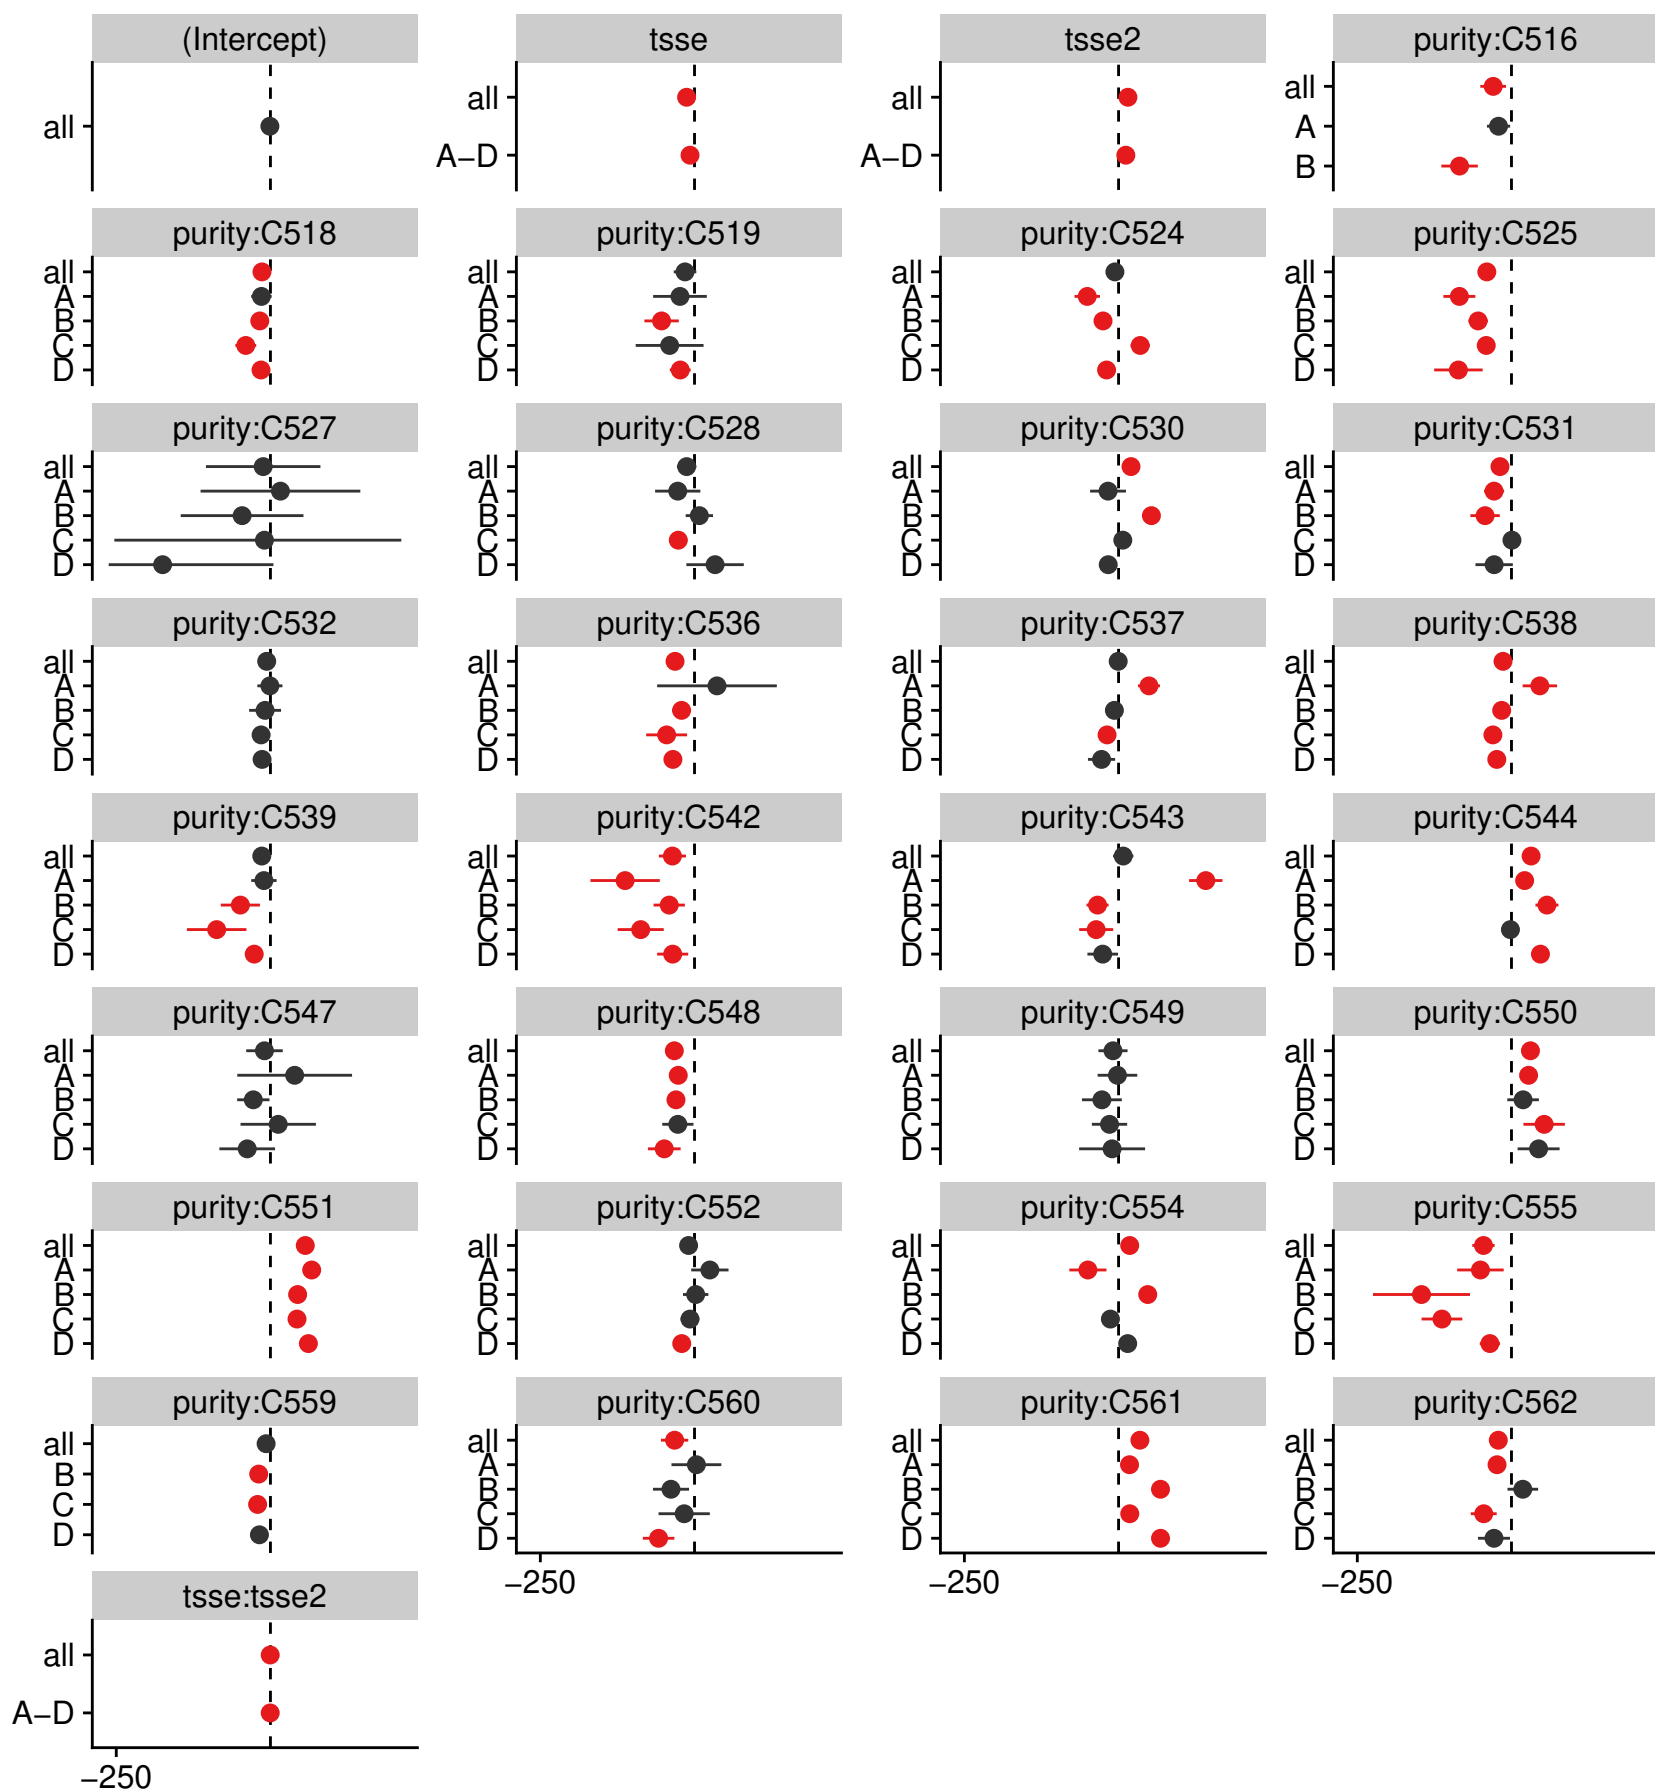

Coefficient

p\_c = < 2.22e-16, p\_sc = < 2.22e-16

# ENCODE\_CTCF\_sites\_COLON\_promotor

+ 7/33 (19/116), - 7/33 (34/116)

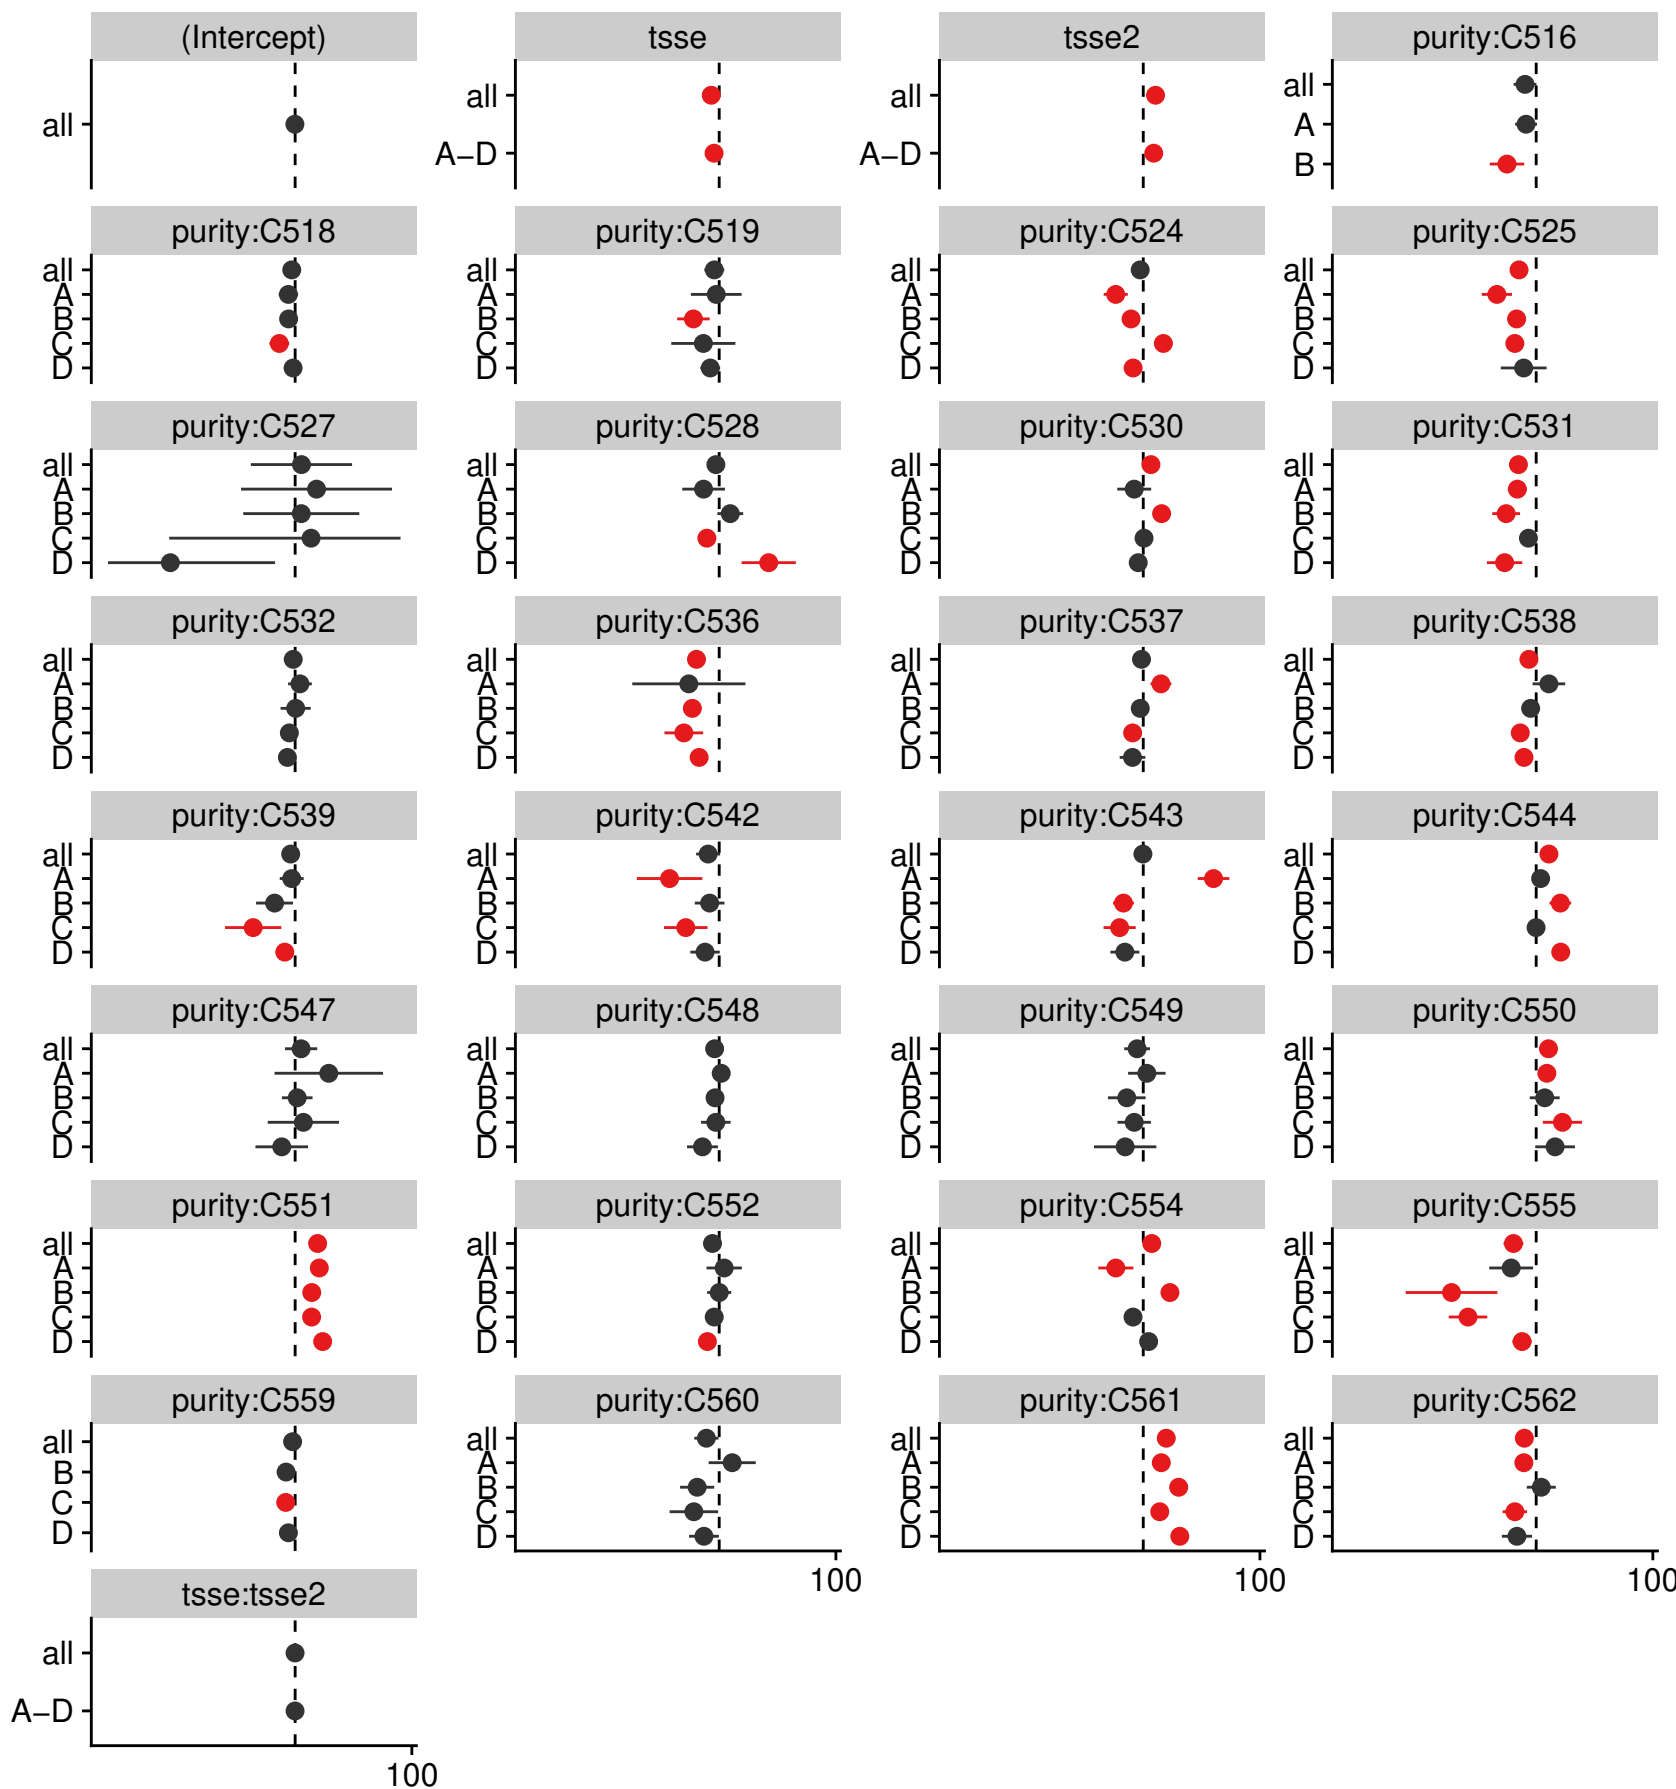

Coefficient

p\_c = < 2.22e-16, p\_sc = < 2.22e-16

# ENCODE\_CTCF\_sites\_COLON\_promotor\_ctcf

+ 7/33 (19/116), - 7/33 (33/116)

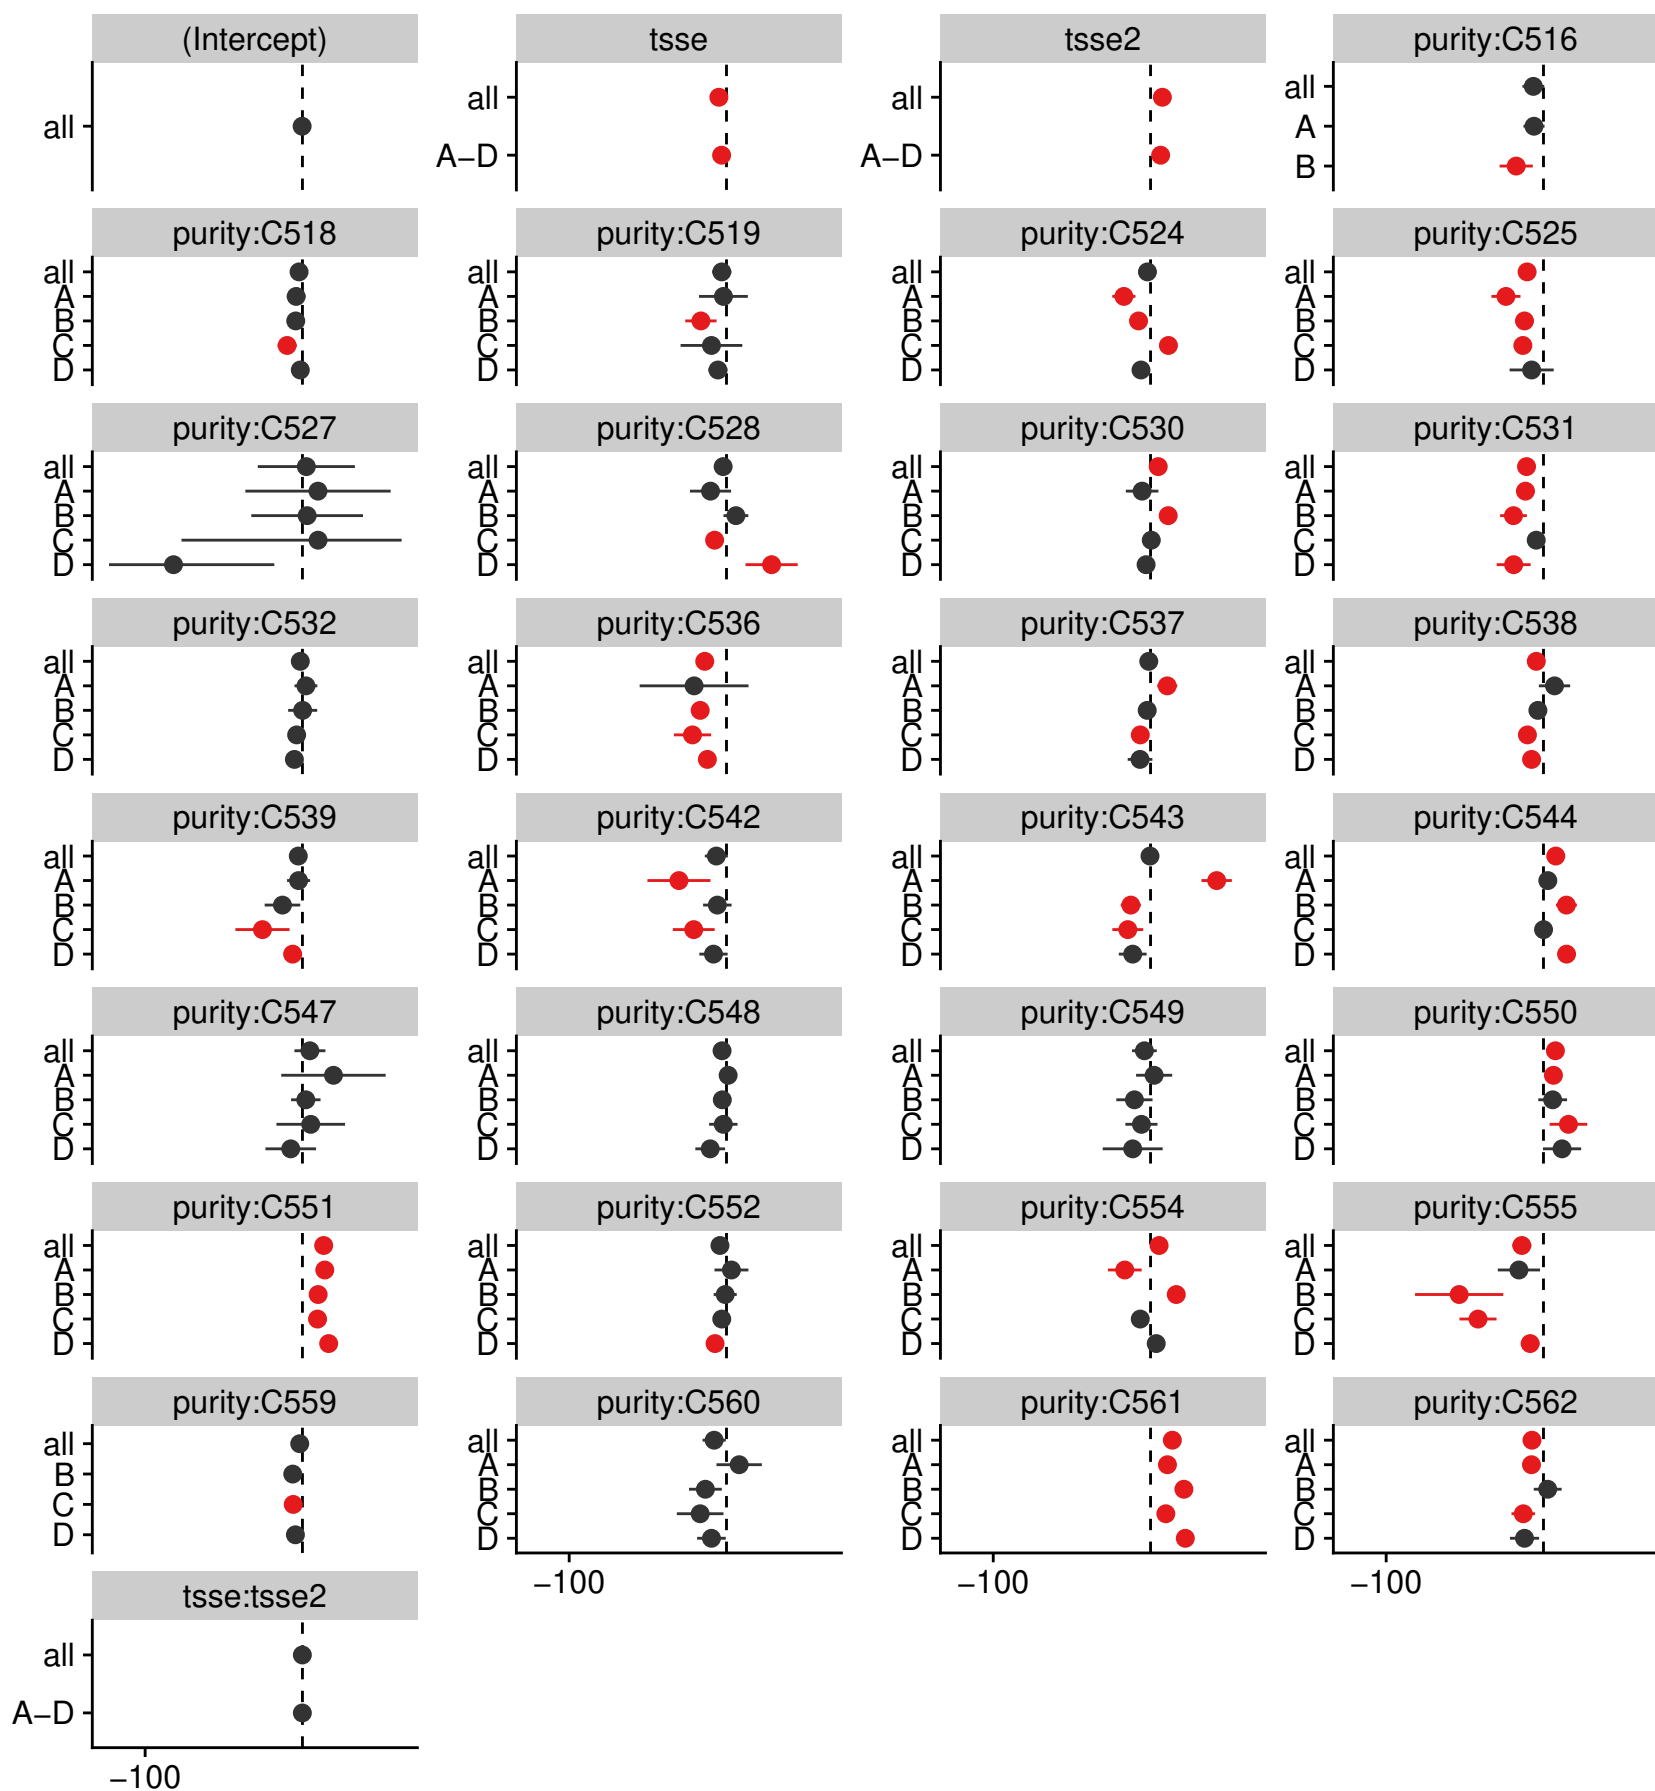

Coefficient

p\_c = < 2.22e-16, p\_sc = < 2.22e-16

# ENCODE\_Y Y1\_sites\_COLON\_nonpromotor

+ 7/33 (17/116), - 6/33 (40/116)

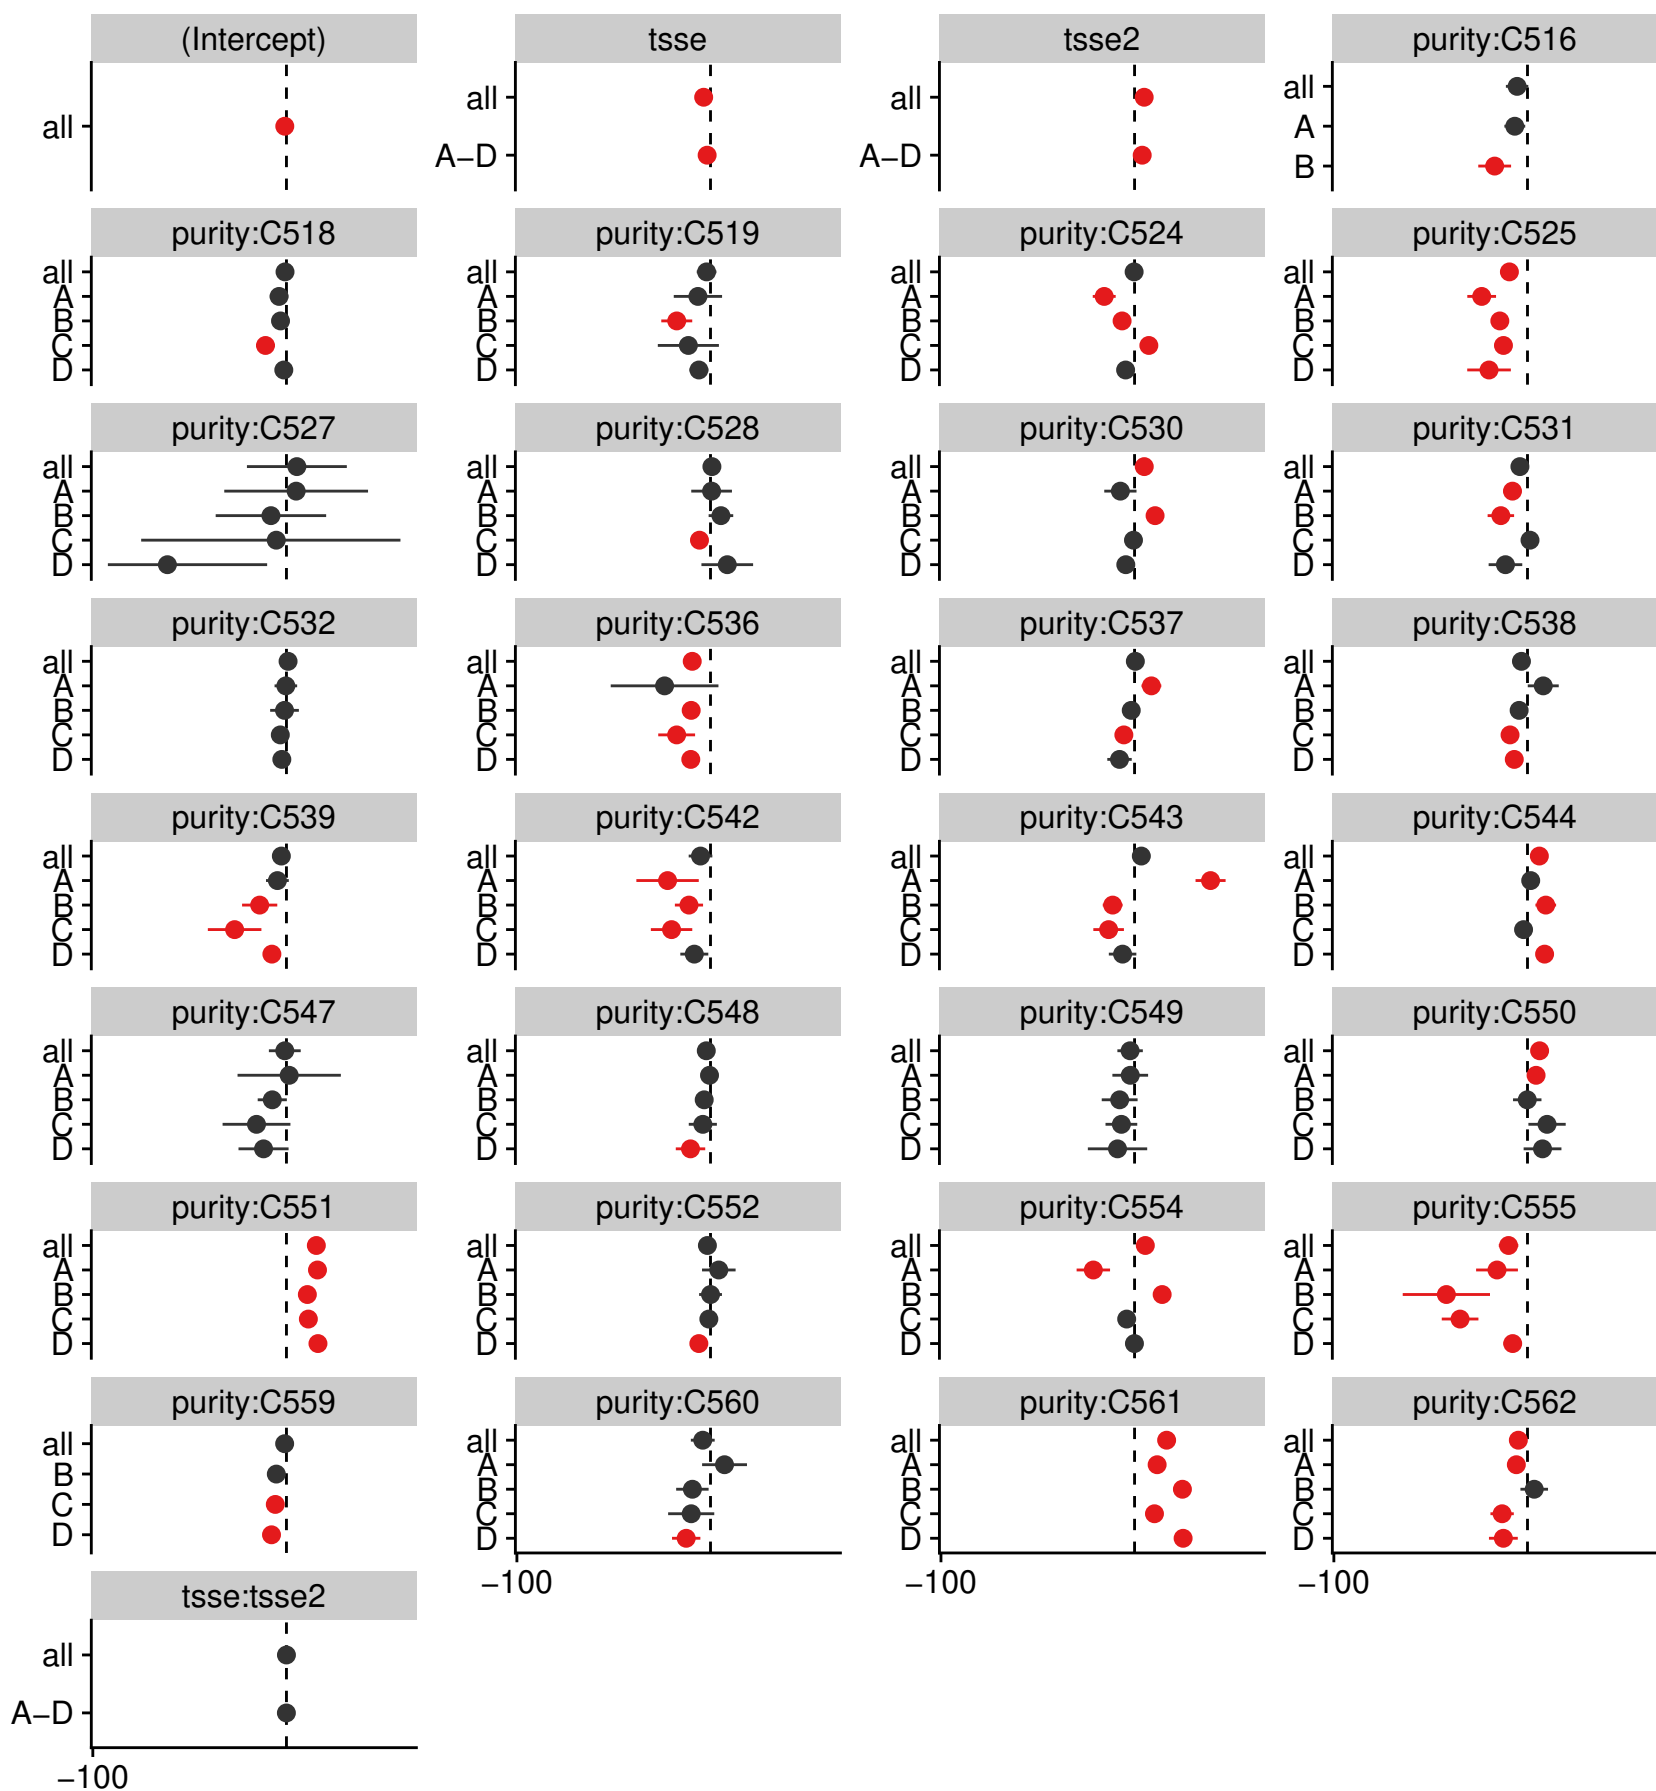

Coefficient

p\_c = < 2.22e-16, p\_sc = < 2.22e-16

# ETS2\_uc\_dTSS\_oPEAK

+ 4/33 (9/116), - 14/33 (10/116)

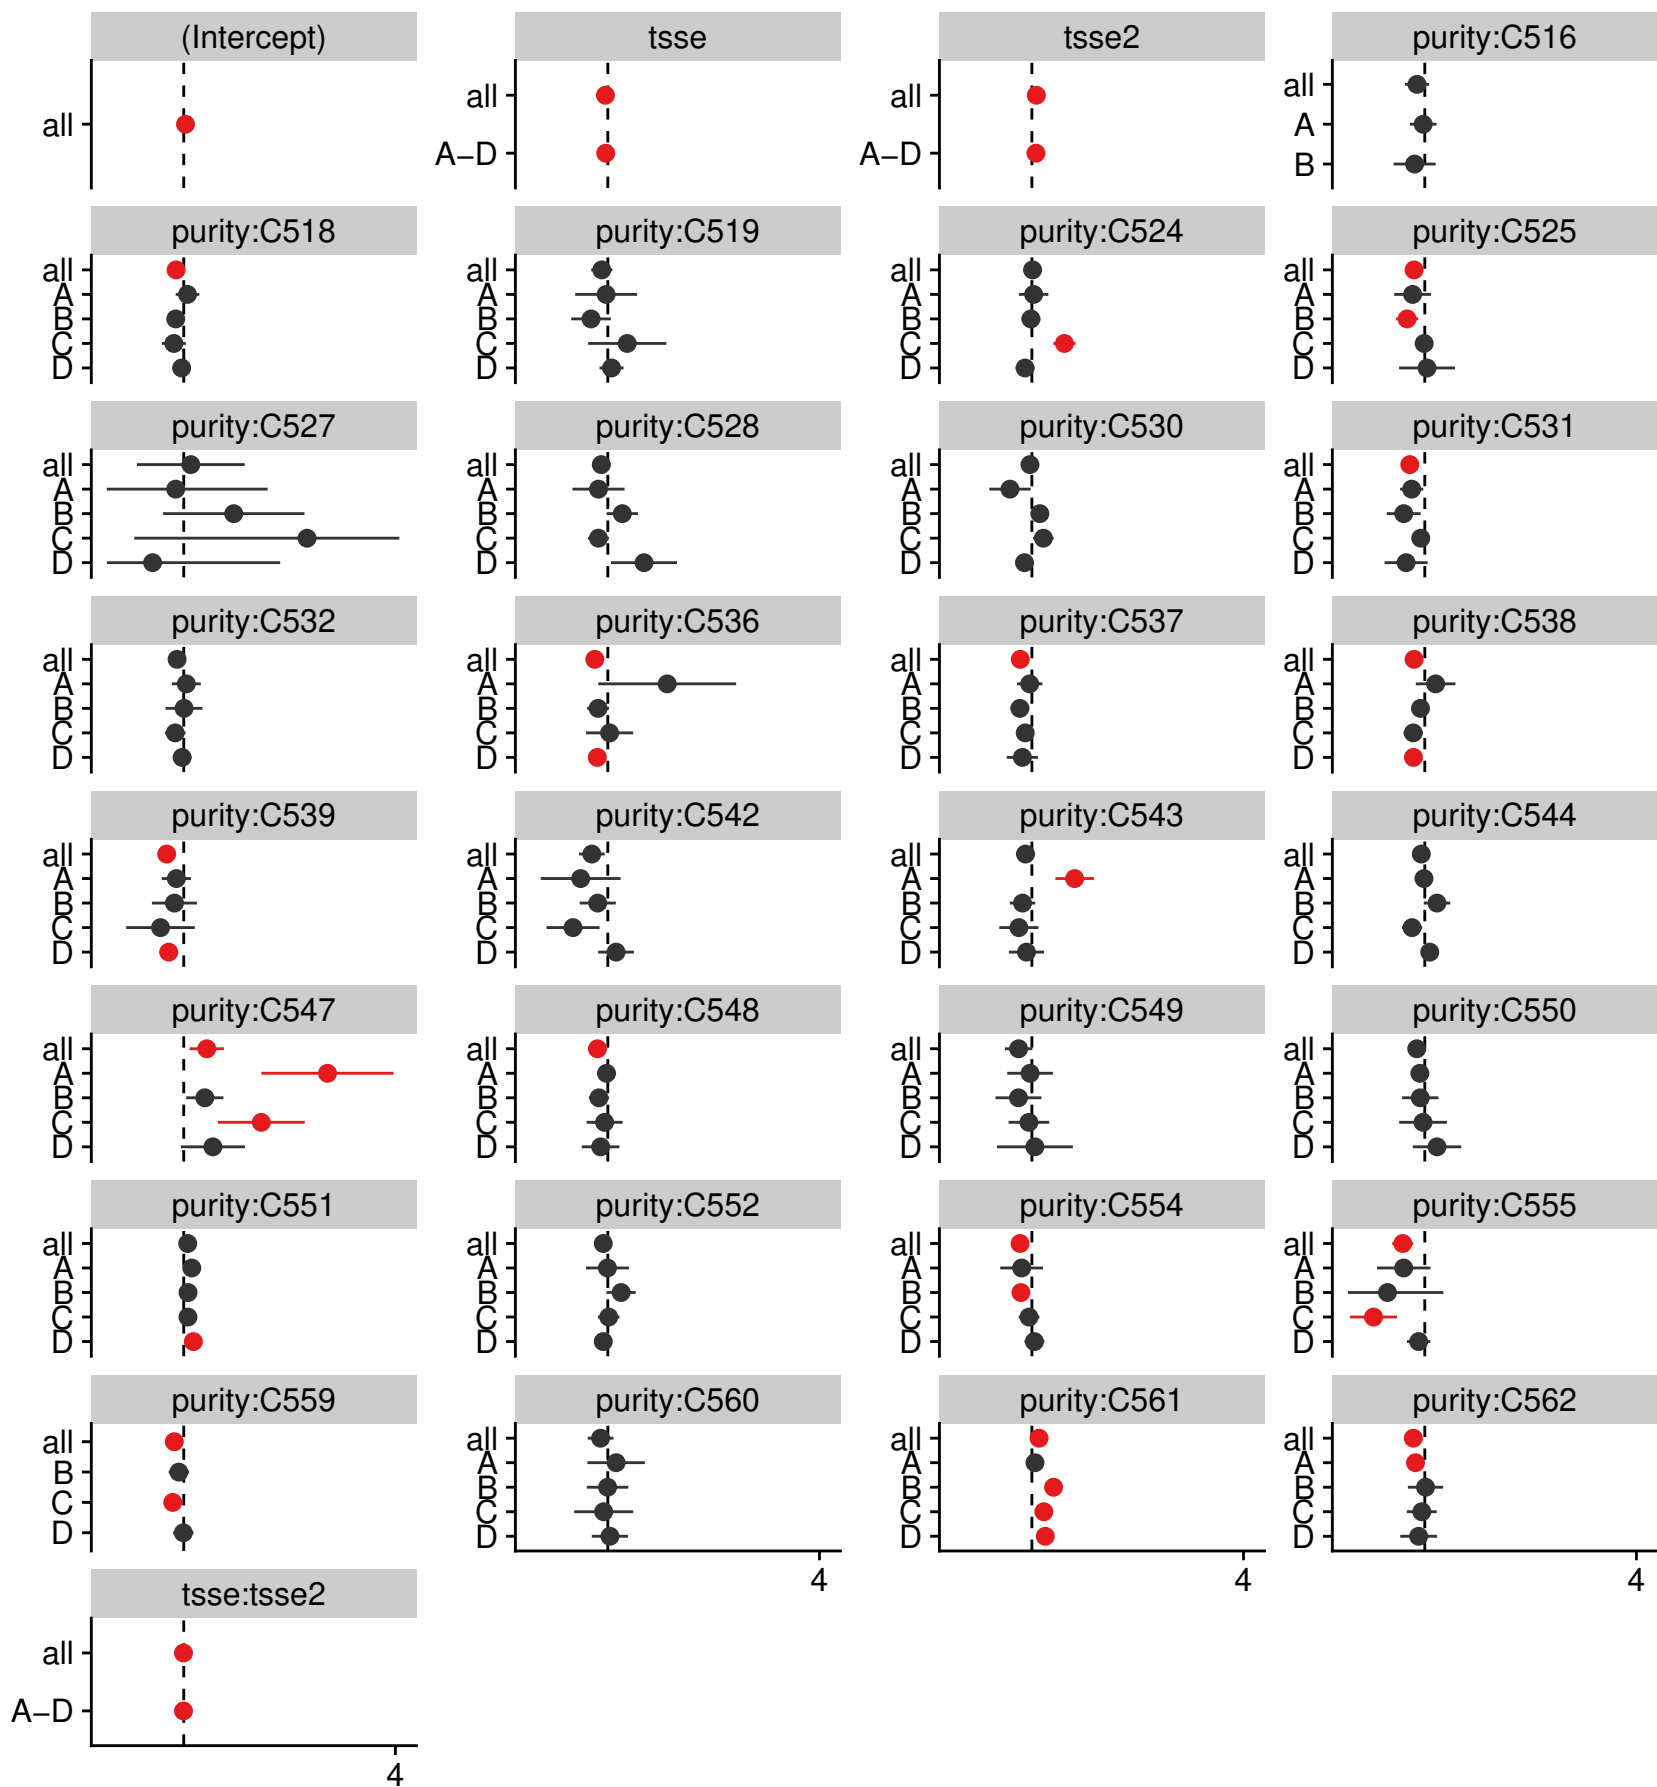

p\_c = < 2.22e-16, p\_sc = 3.418e-09



# ETV7\_uc\_dTSS\_oPEAK

+ 2/33 (2/116), - 11/33 (23/116)

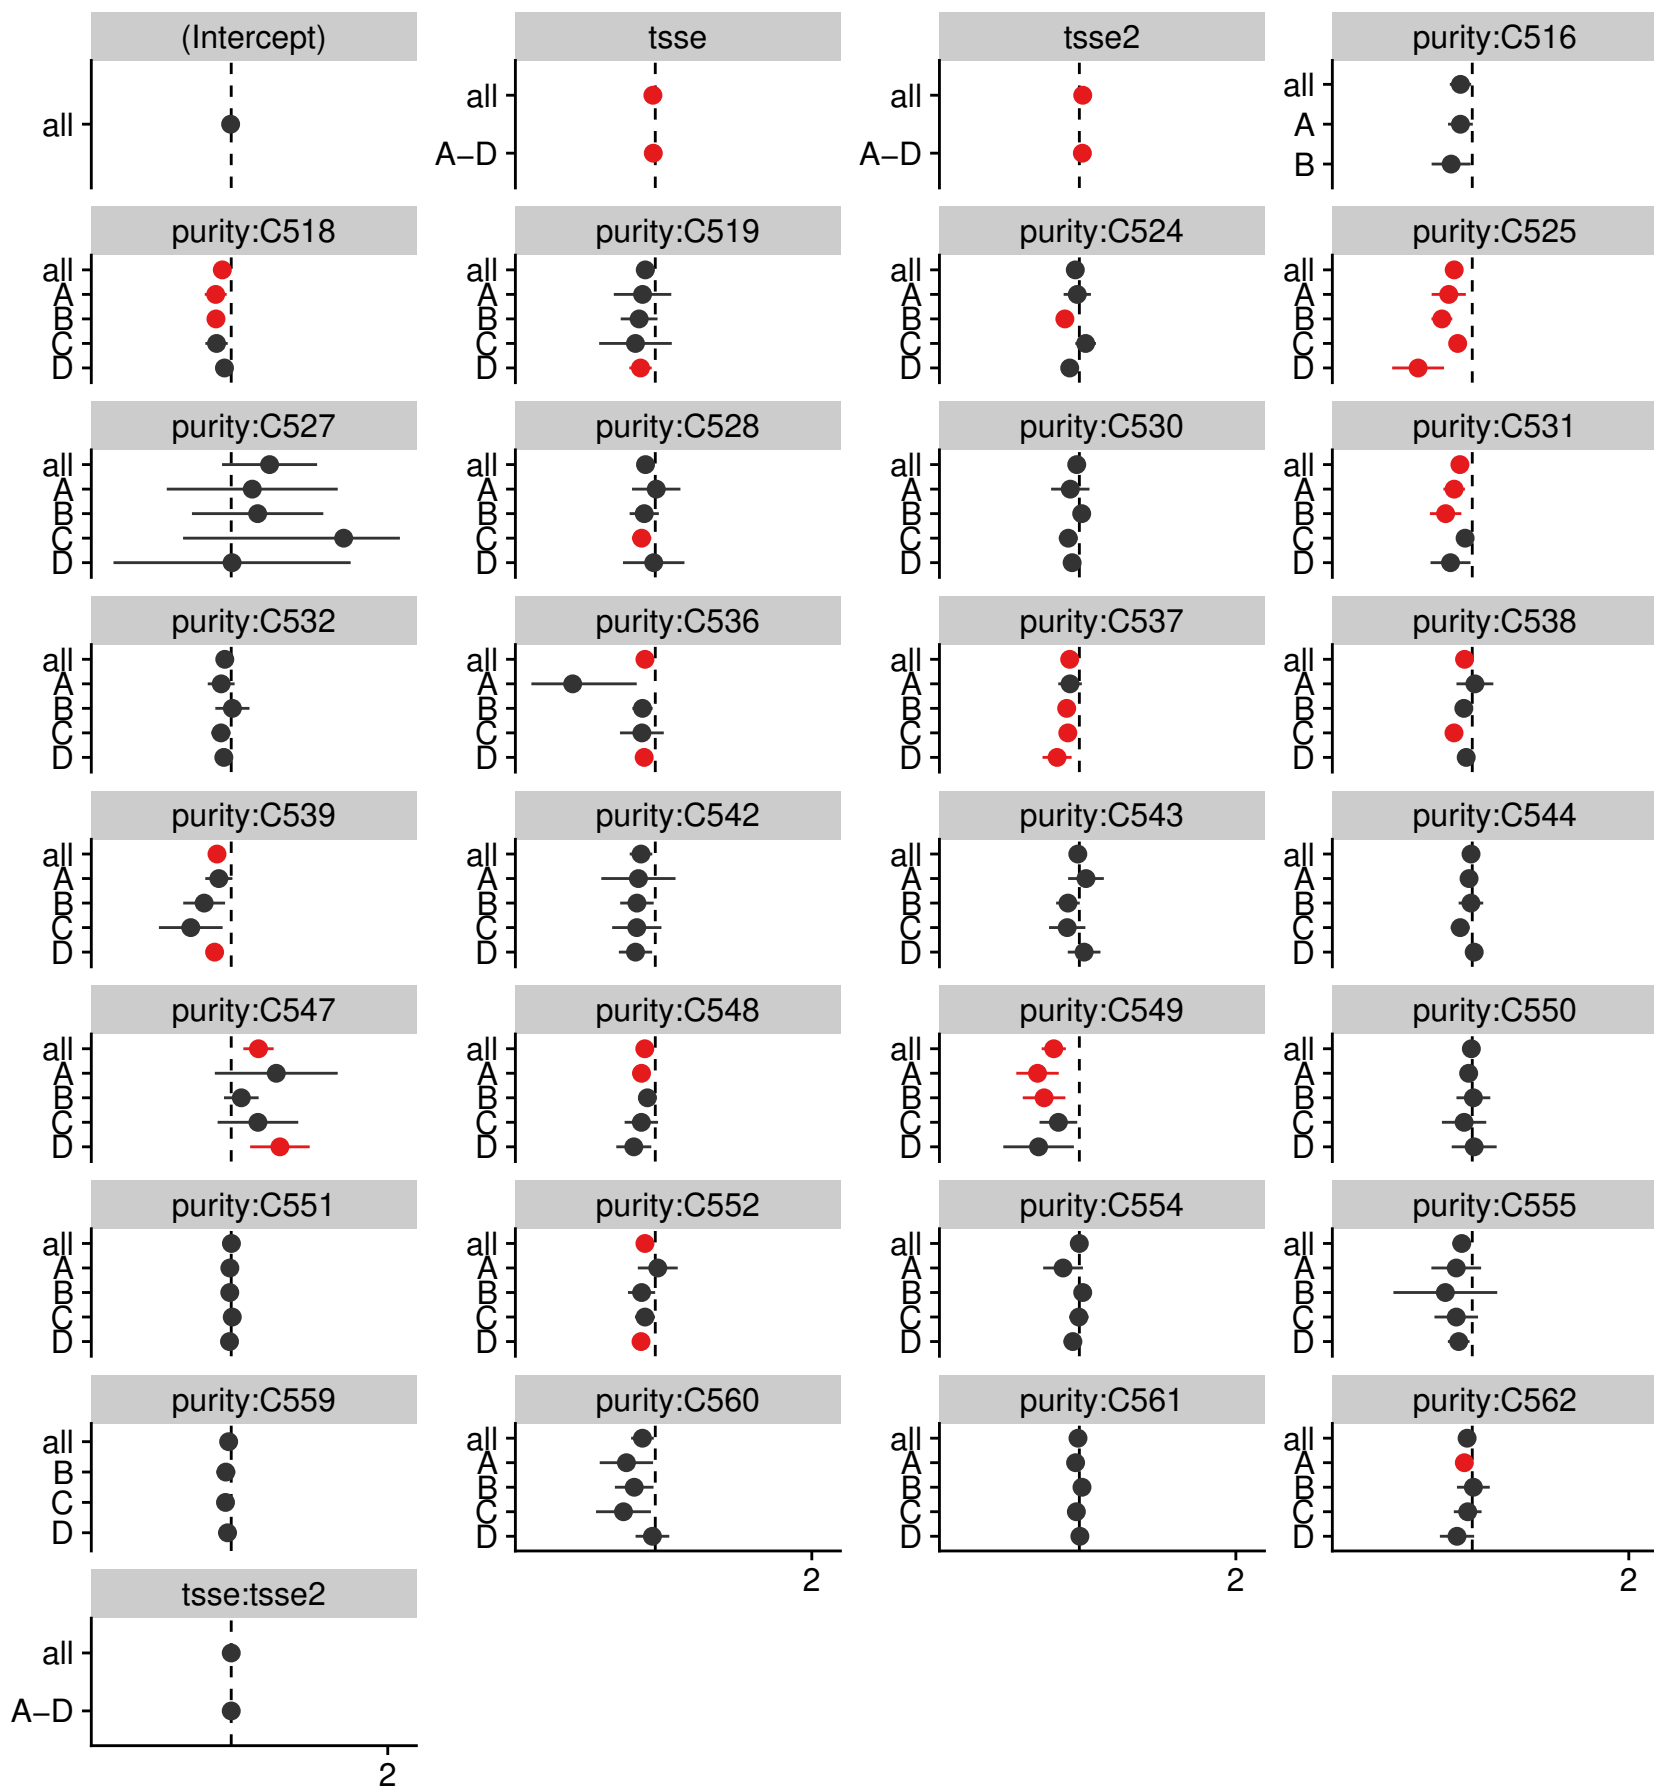

Coefficient

p\_c = 2.4178e-15, p\_sc = 0.1476

# FOXB2\_uc\_dTSS\_nPEAK

+ 13/33 (3/116), - 1/33 (14/116)

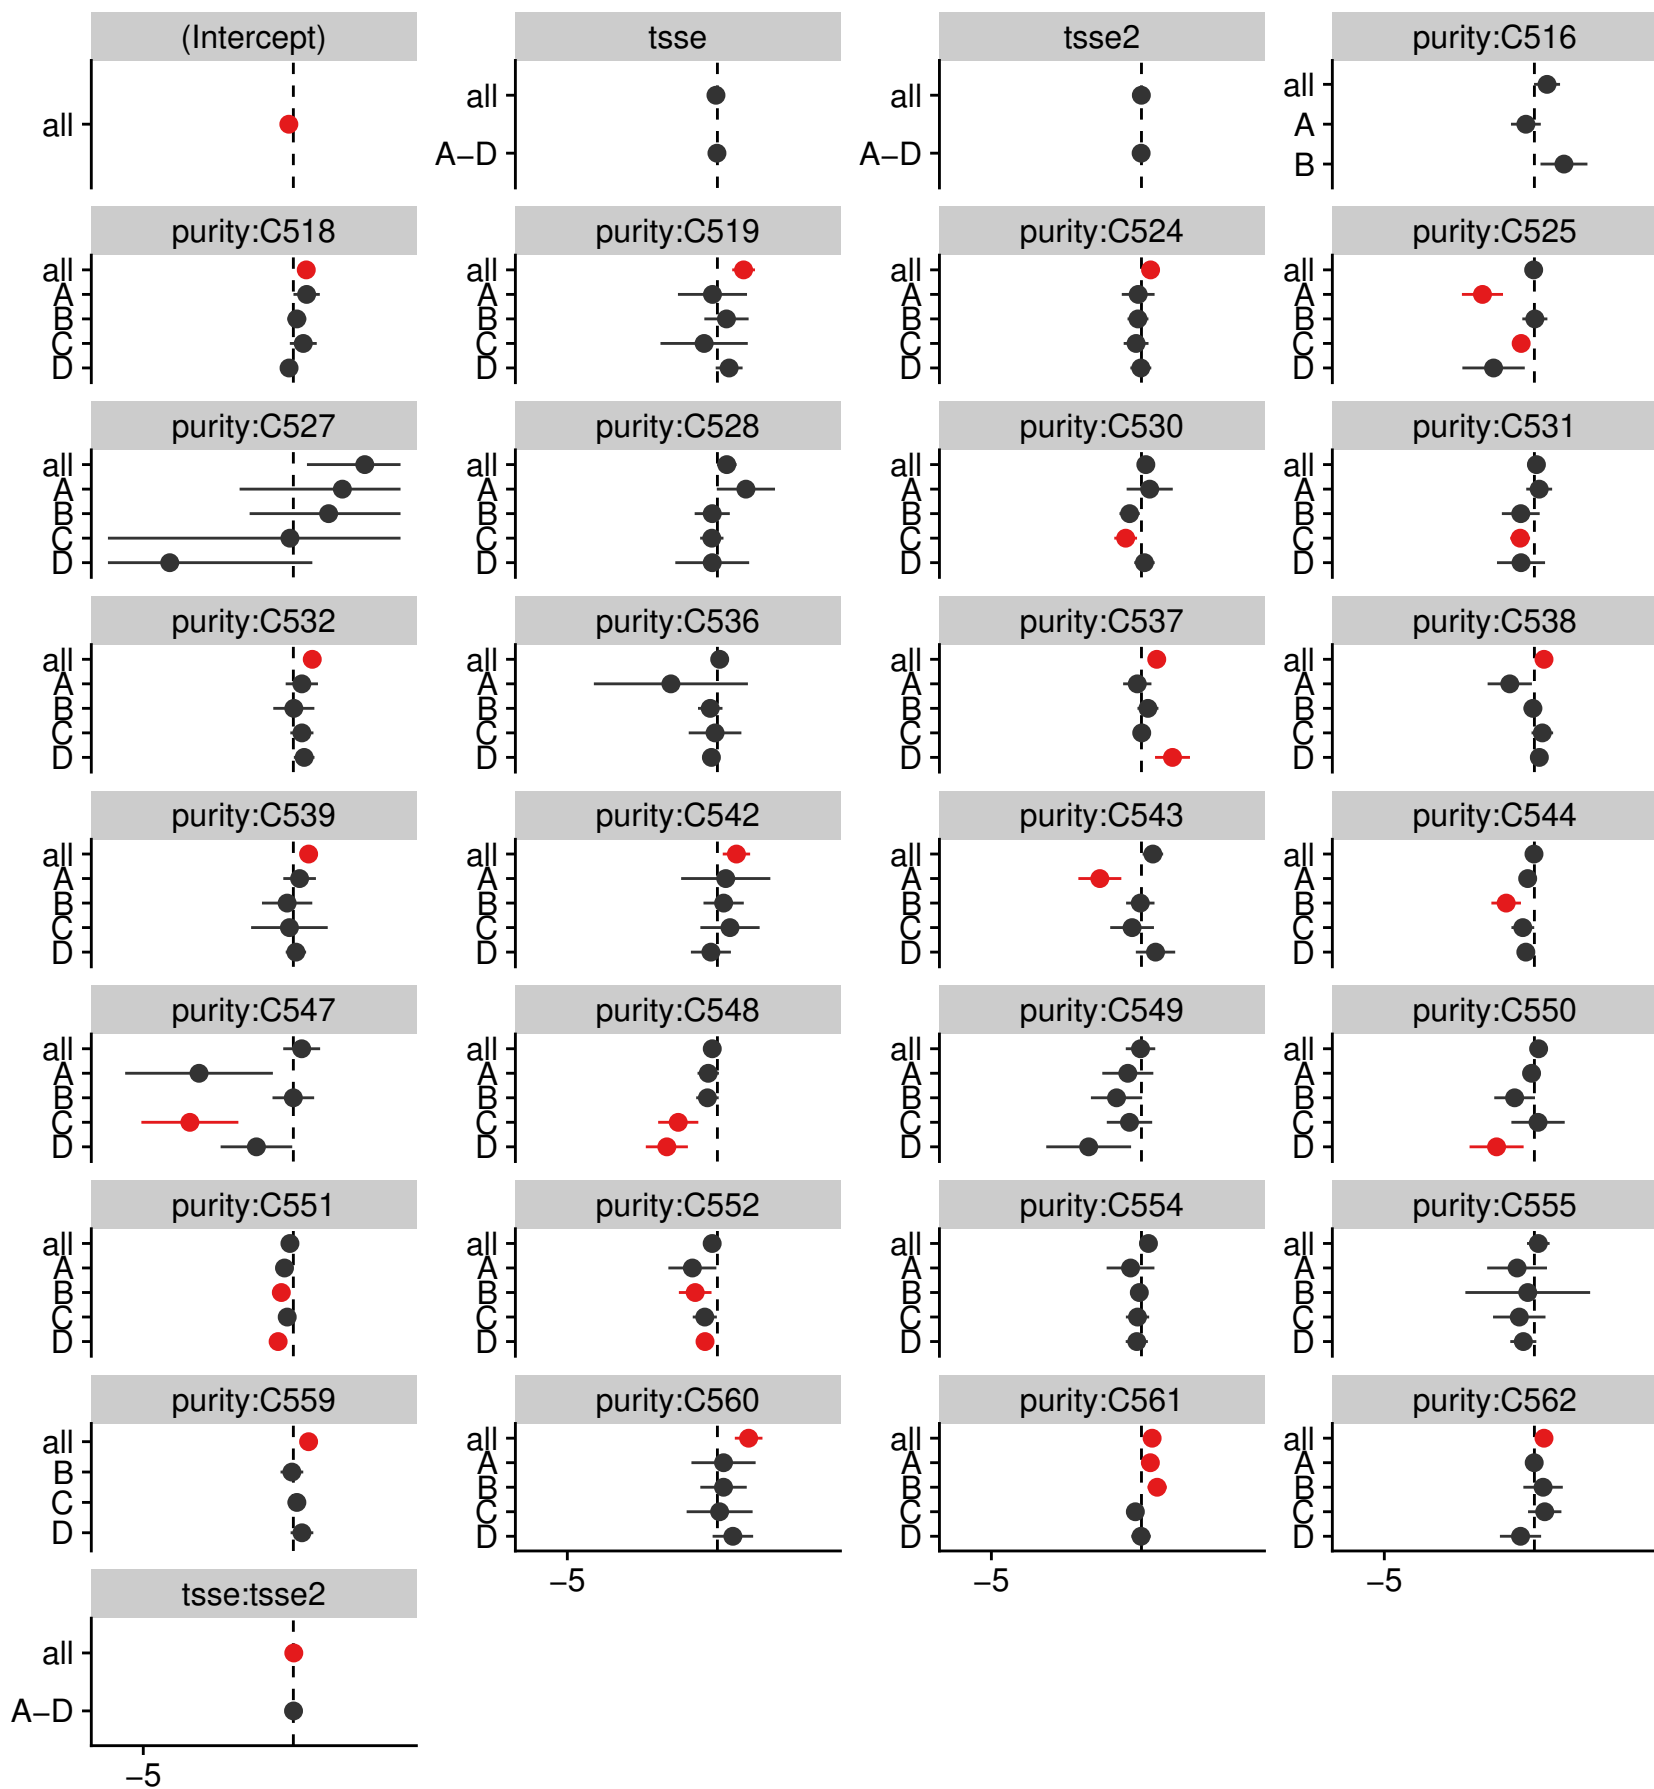

Coefficient

p\_c = < 2.22e-16, p\_sc = 0.0096368

# FOXD4L2\_uc\_cTSS\_nPEAK

+ 13/33 (5/116), - 5/33 (21/116)

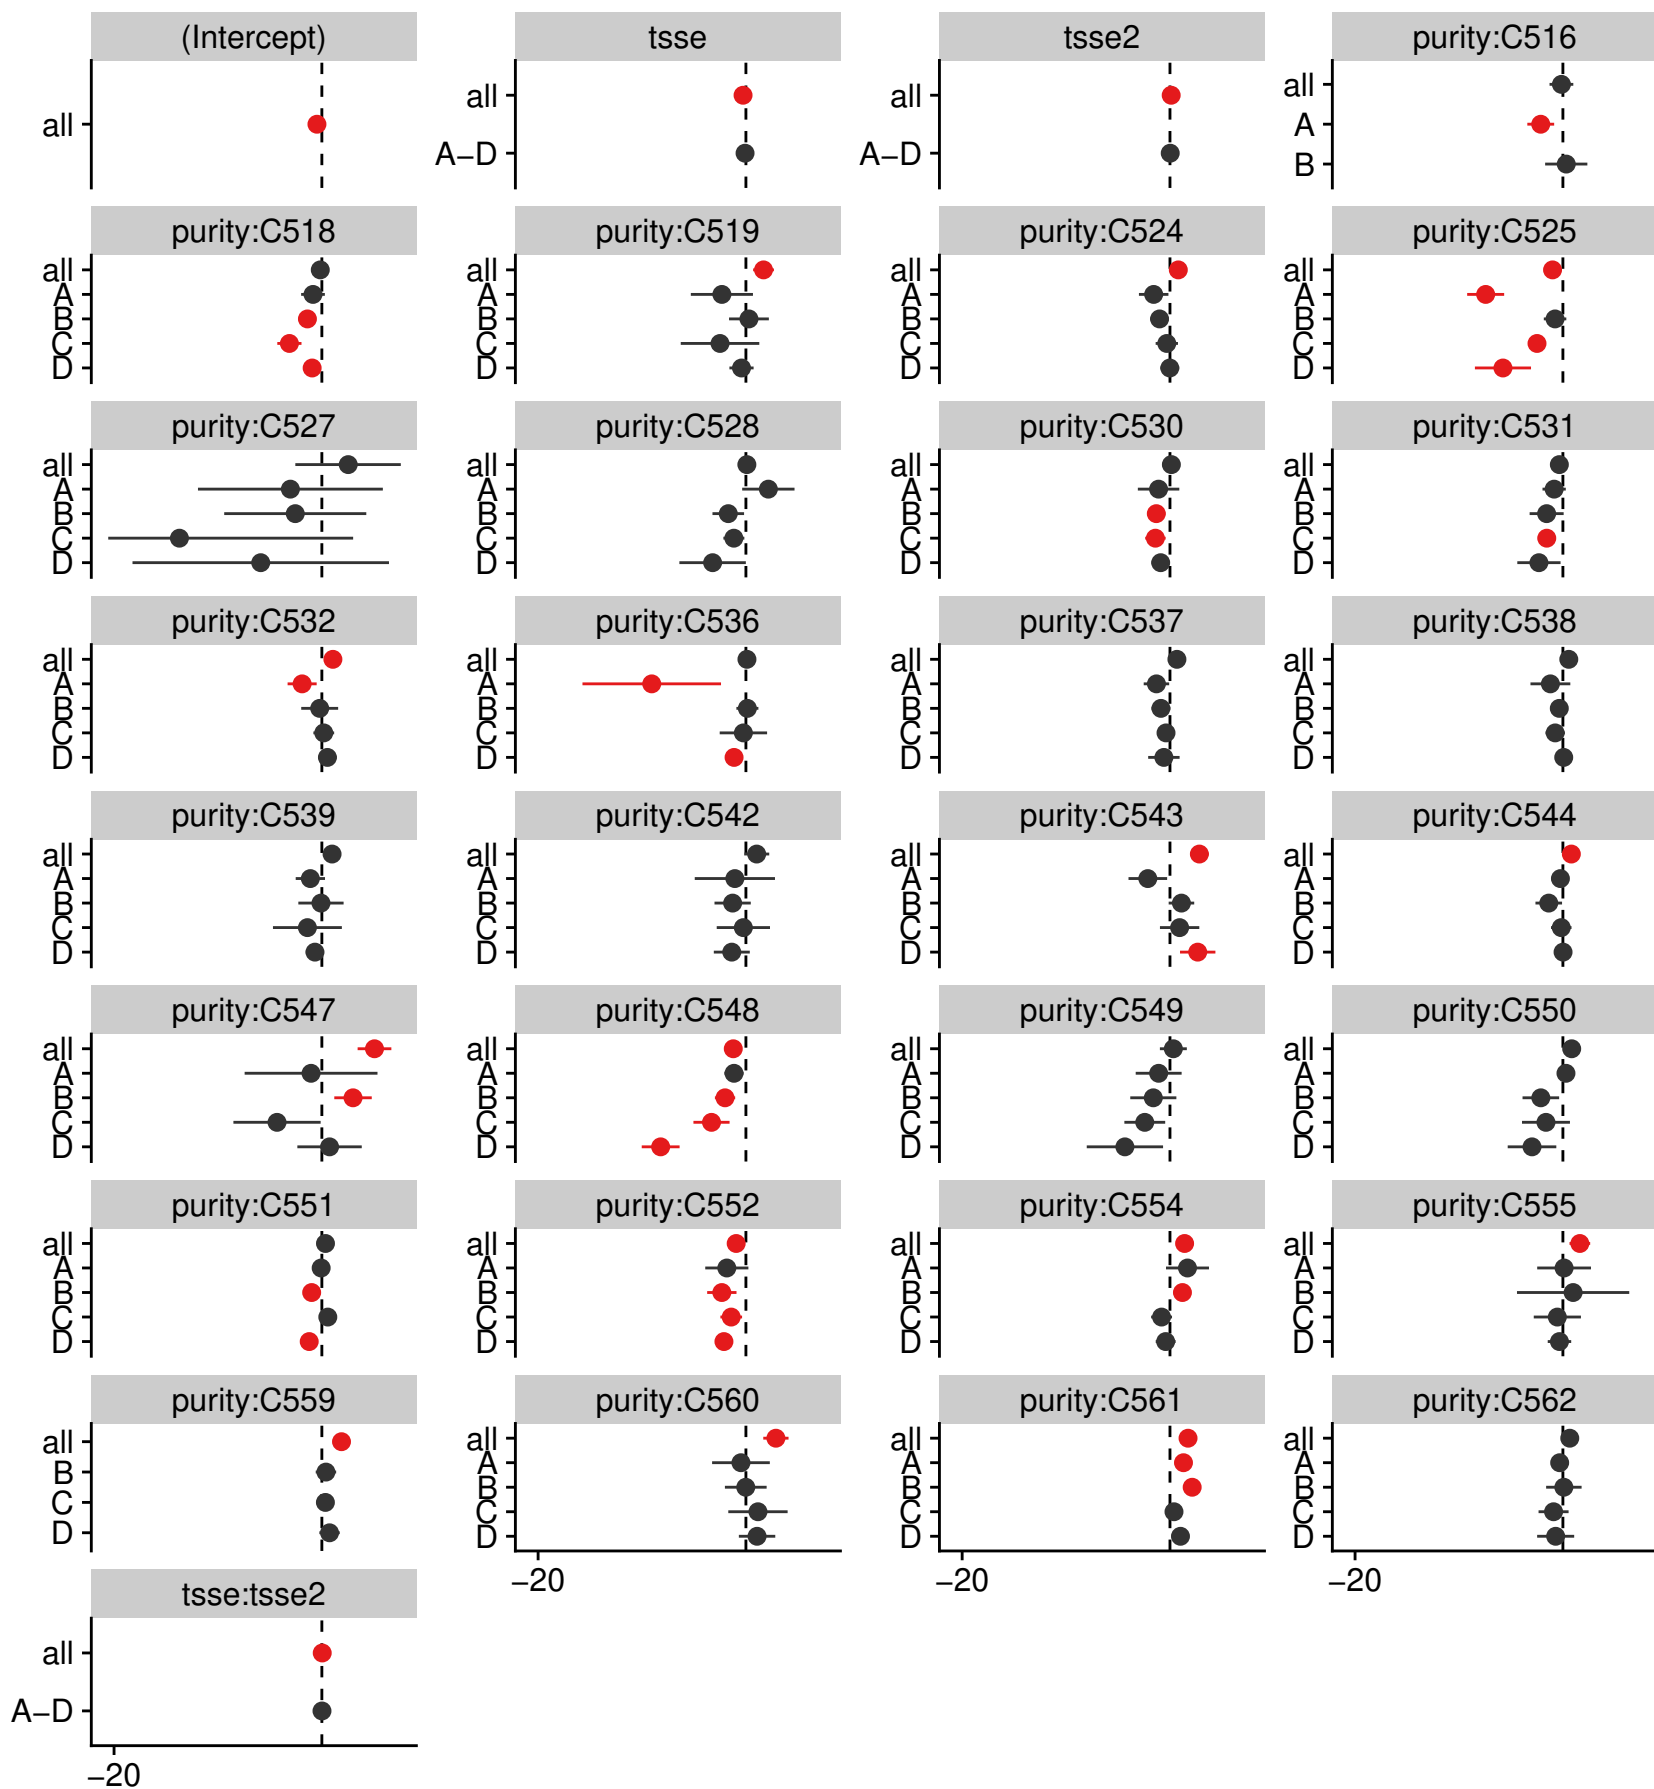

Coefficient

p\_c = < 2.22e-16, p\_sc = 6.052e-05

# FOXD4L3\_uc\_cTSS\_nPEAK

+ 13/33 (5/116), - 5/33 (21/116)



Coefficient

$p_c = < 2.22e-16$ ,  $p_{sc} = 6.052e-05$

# FOXD4L4\_uc\_cTSS\_nPEAK

+ 13/33 (5/116), - 5/33 (21/116)



Coefficient

p\_c = < 2.22e-16, p\_sc = 6.052e-05

# FOXD4L5\_uc\_cTSS\_nPEAK

+ 13/33 (5/116), - 5/33 (21/116)



Coefficient

p\_c = < 2.22e-16, p\_sc = 6.052e-05

# FOXD4L6\_uc\_cTSS\_nPEAK

+ 13/33 (5/116), - 5/33 (21/116)



Coefficient

p\_c = < 2.22e-16, p\_sc = 6.052e-05

# FOXL1\_uc\_cTSS\_nPEAK

+ 13/33 (17/116), - 4/33 (6/116)

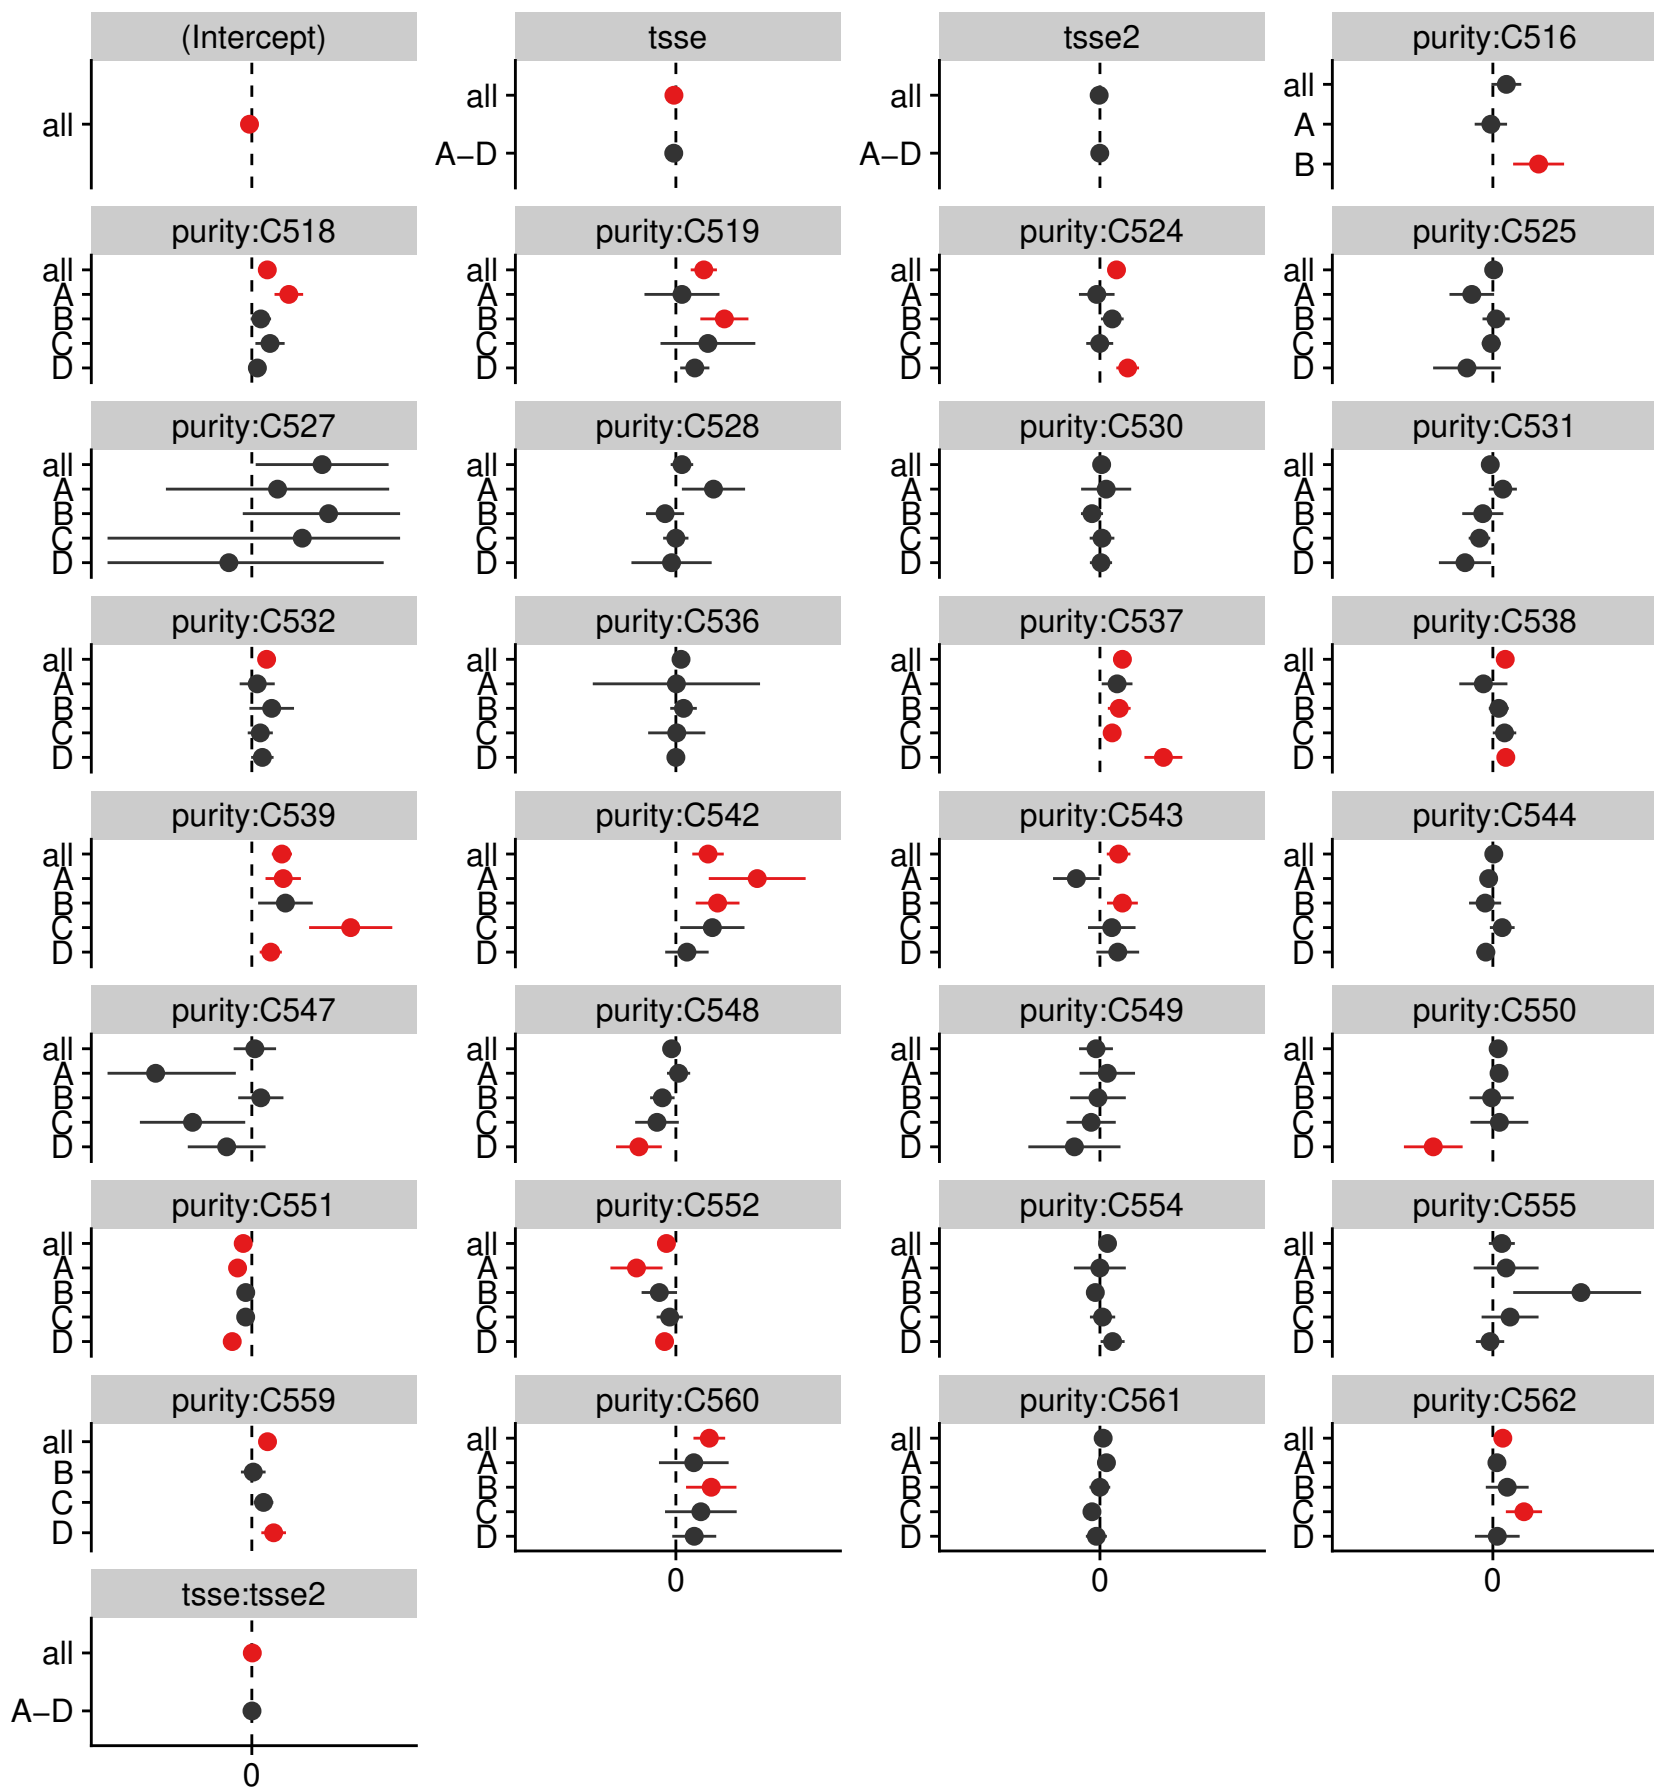

Coefficient

p\_c = < 2.22e-16, p\_sc = 2.1032e-12



# FOXL1\_uc\_dTSS\_nPEAK

+ 14/33 (26/116), - 2/33 (15/116)

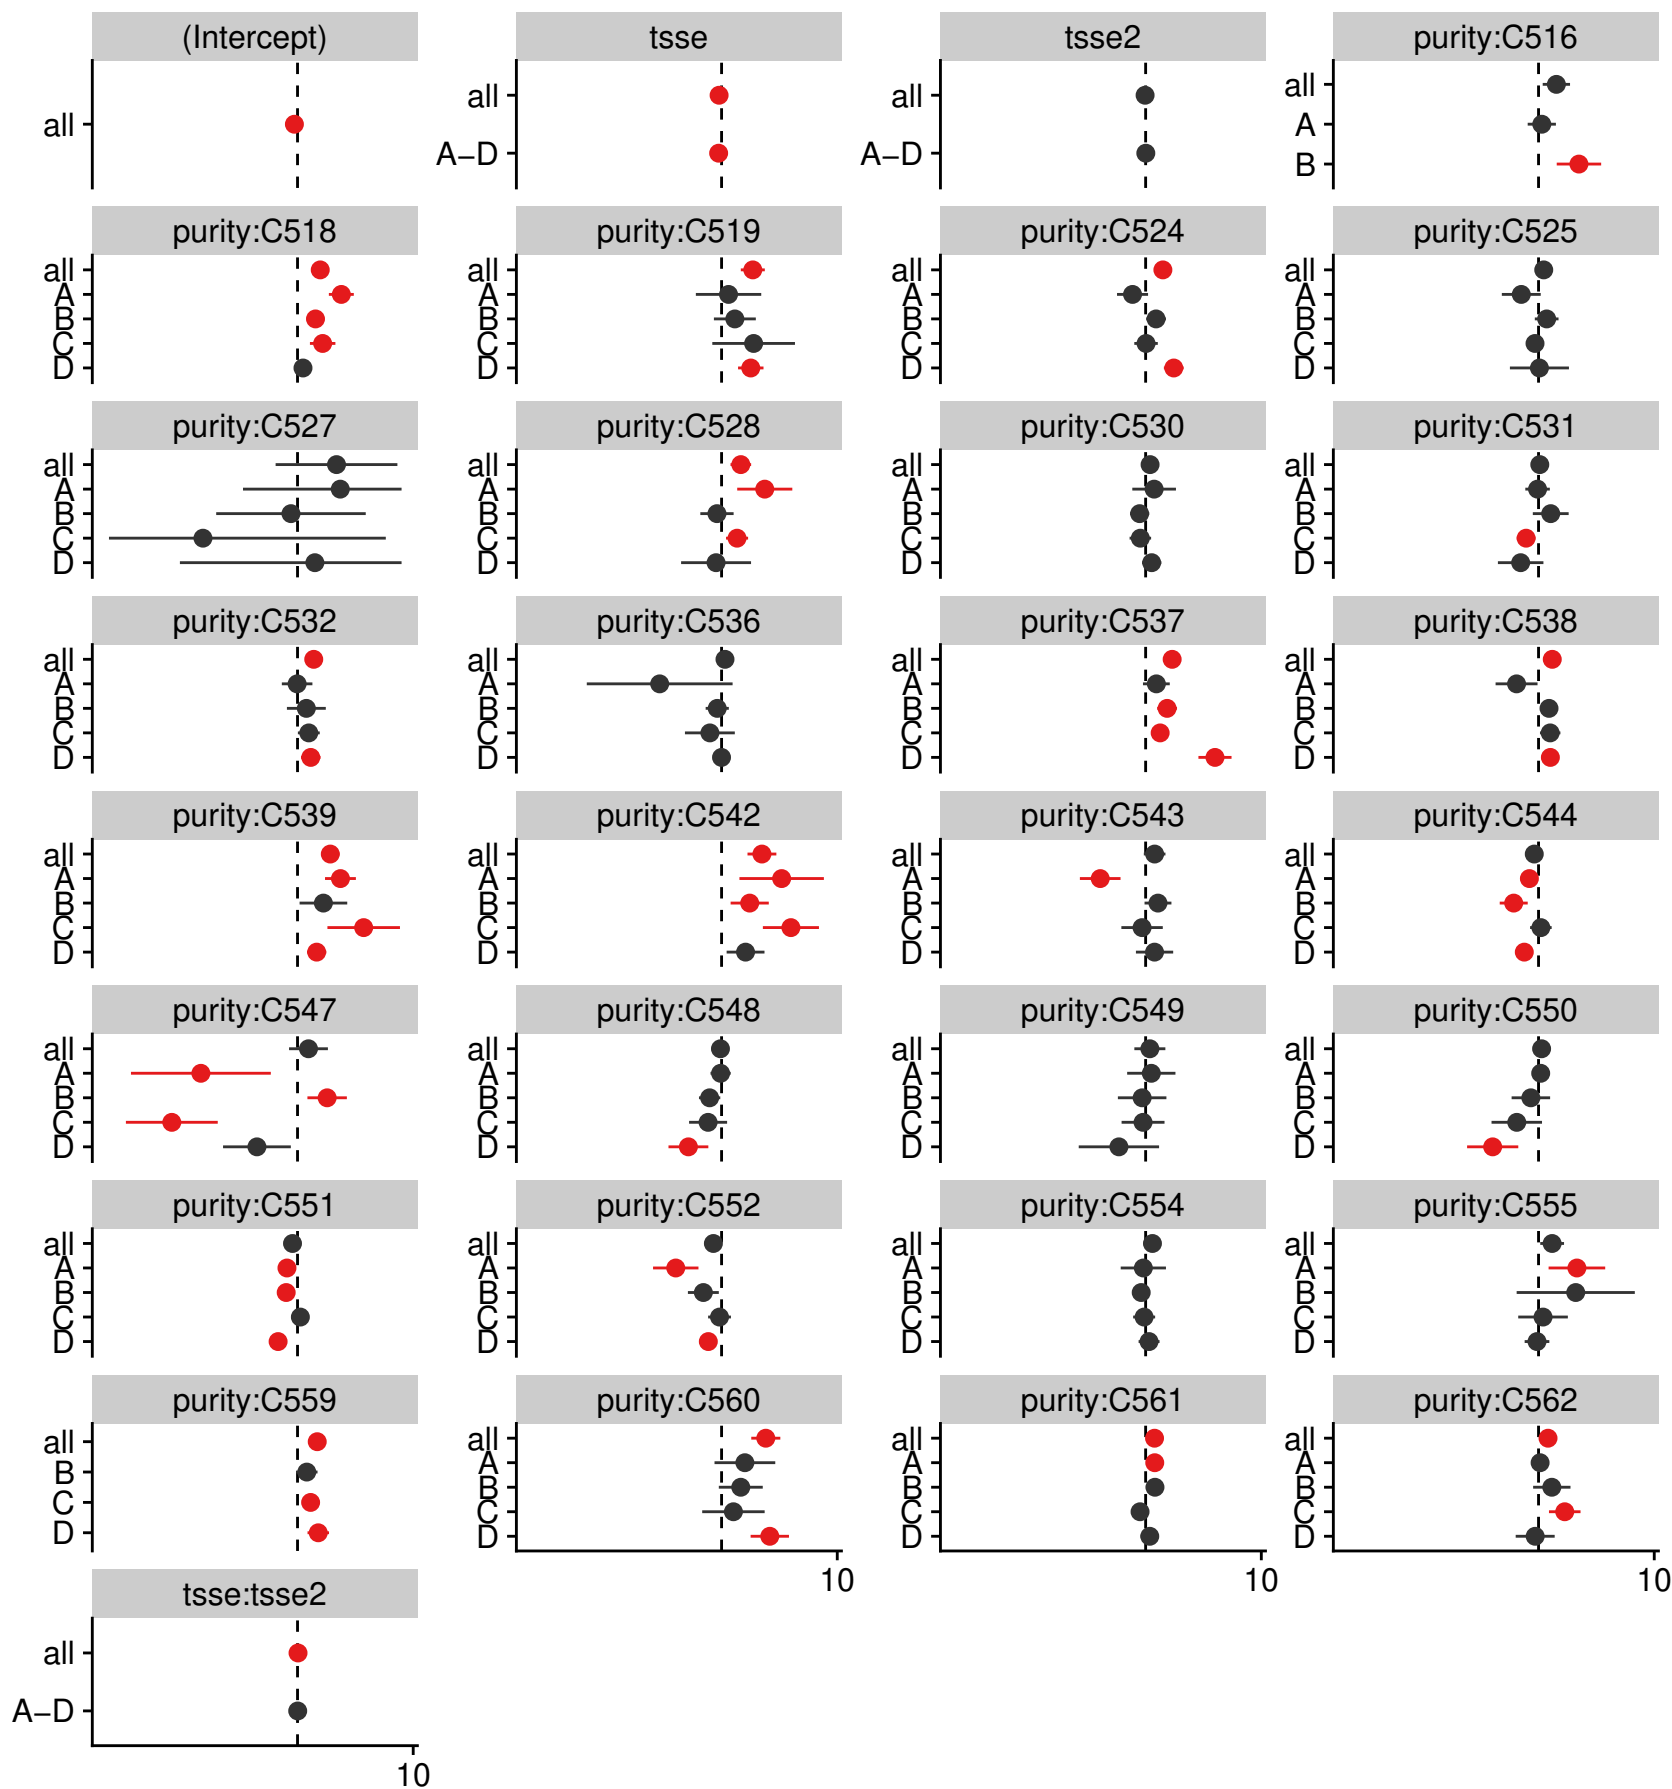

p\_c = < 2.22e-16, p\_sc = < 2.22e-16

# FOXL1\_uc\_dTSS\_oPEAK

+ 16/33 (15/116), - 3/33 (15/116)

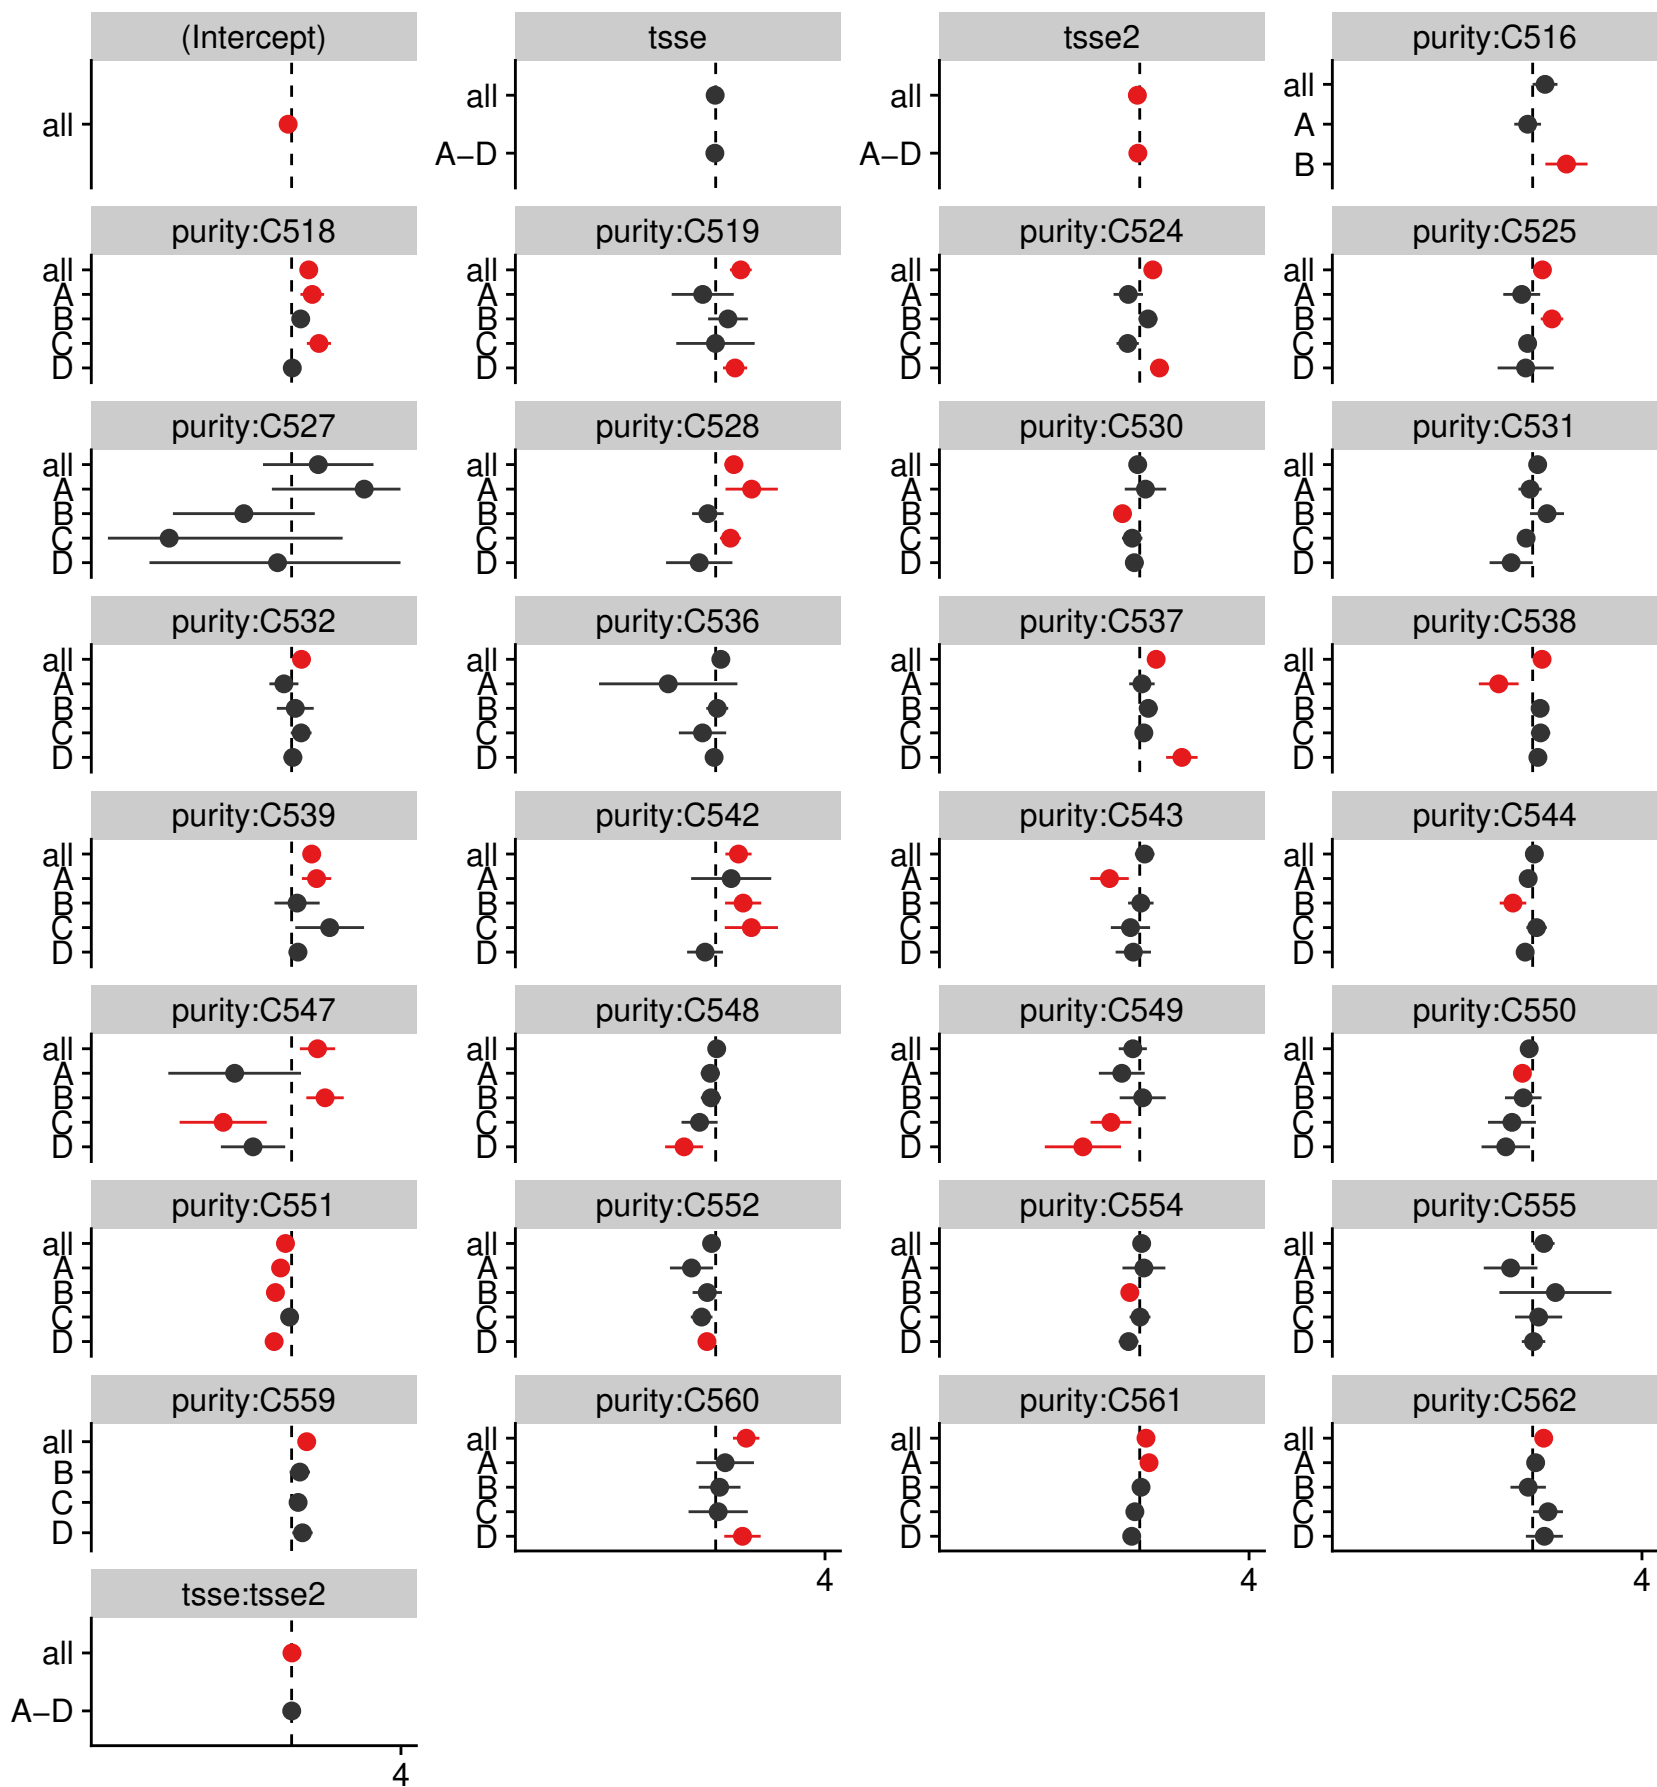

Coefficient

p\_c = < 2.22e-16, p\_sc = 1.9192e-13

# FOXL1\_uc\_pTSS\_oPEAK

+ 17/33 (5/116), - 2/33 (14/116)

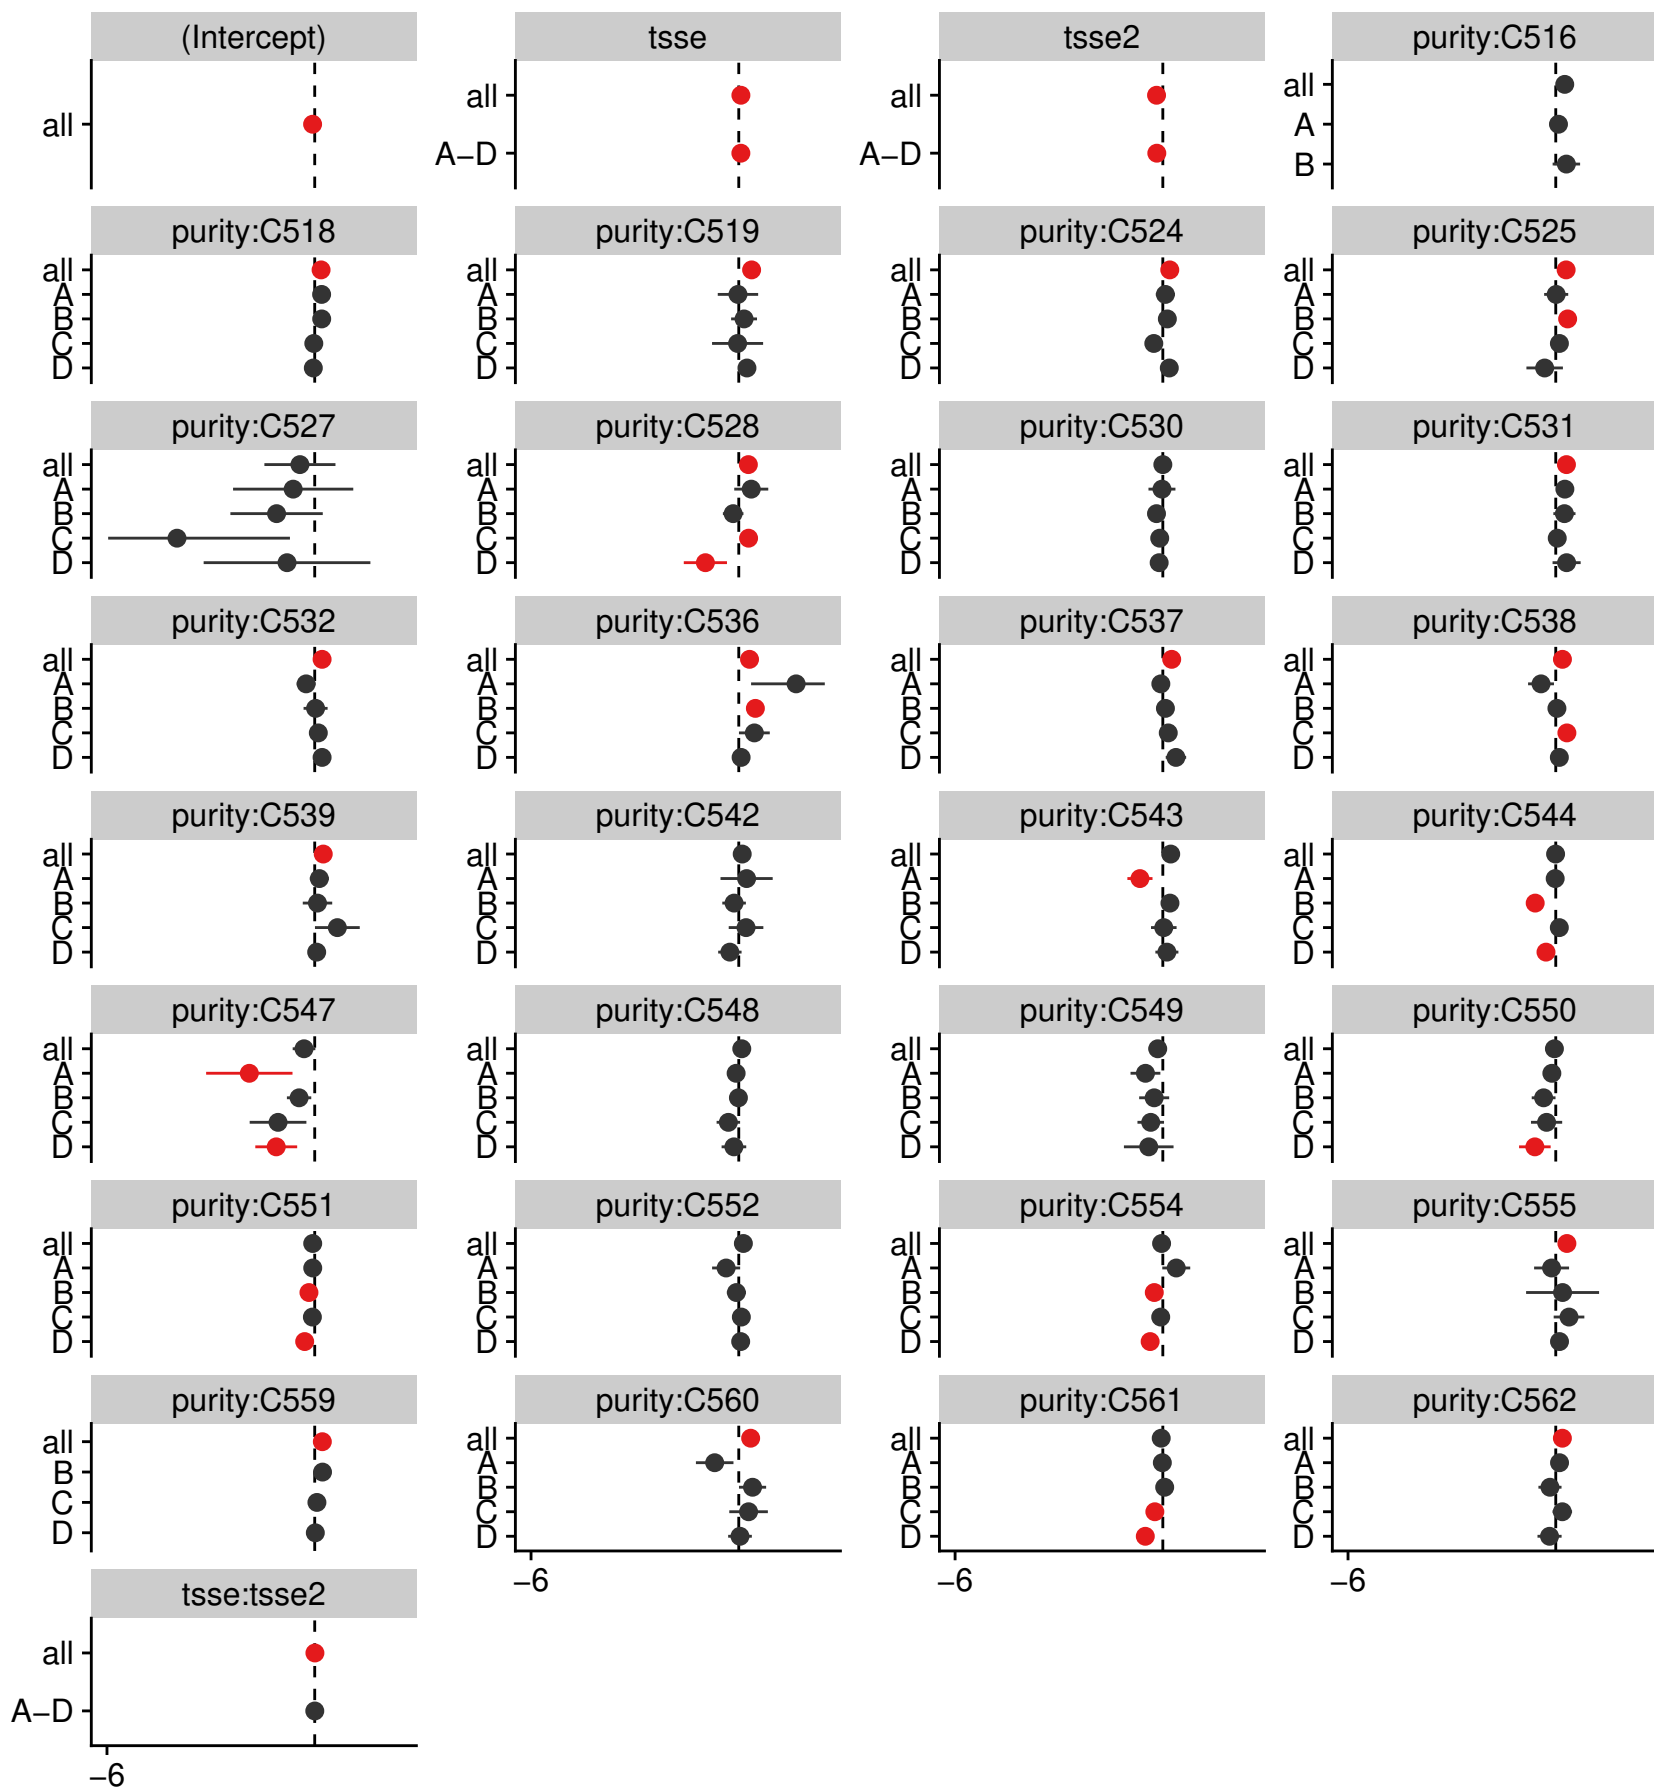

p\_c = < 2.22e-16, p\_sc = 6.9687e-11

# FOXP3\_uc\_cTSS\_nPEAK

+ 13/33 (5/116), - 5/33 (21/116)



p\_c = < 2.22e-16, p\_sc = 6.052e-05

# HHEX\_uc\_dTSS\_nPEAK

+ 12/33 (7/116), - 3/33 (23/116)

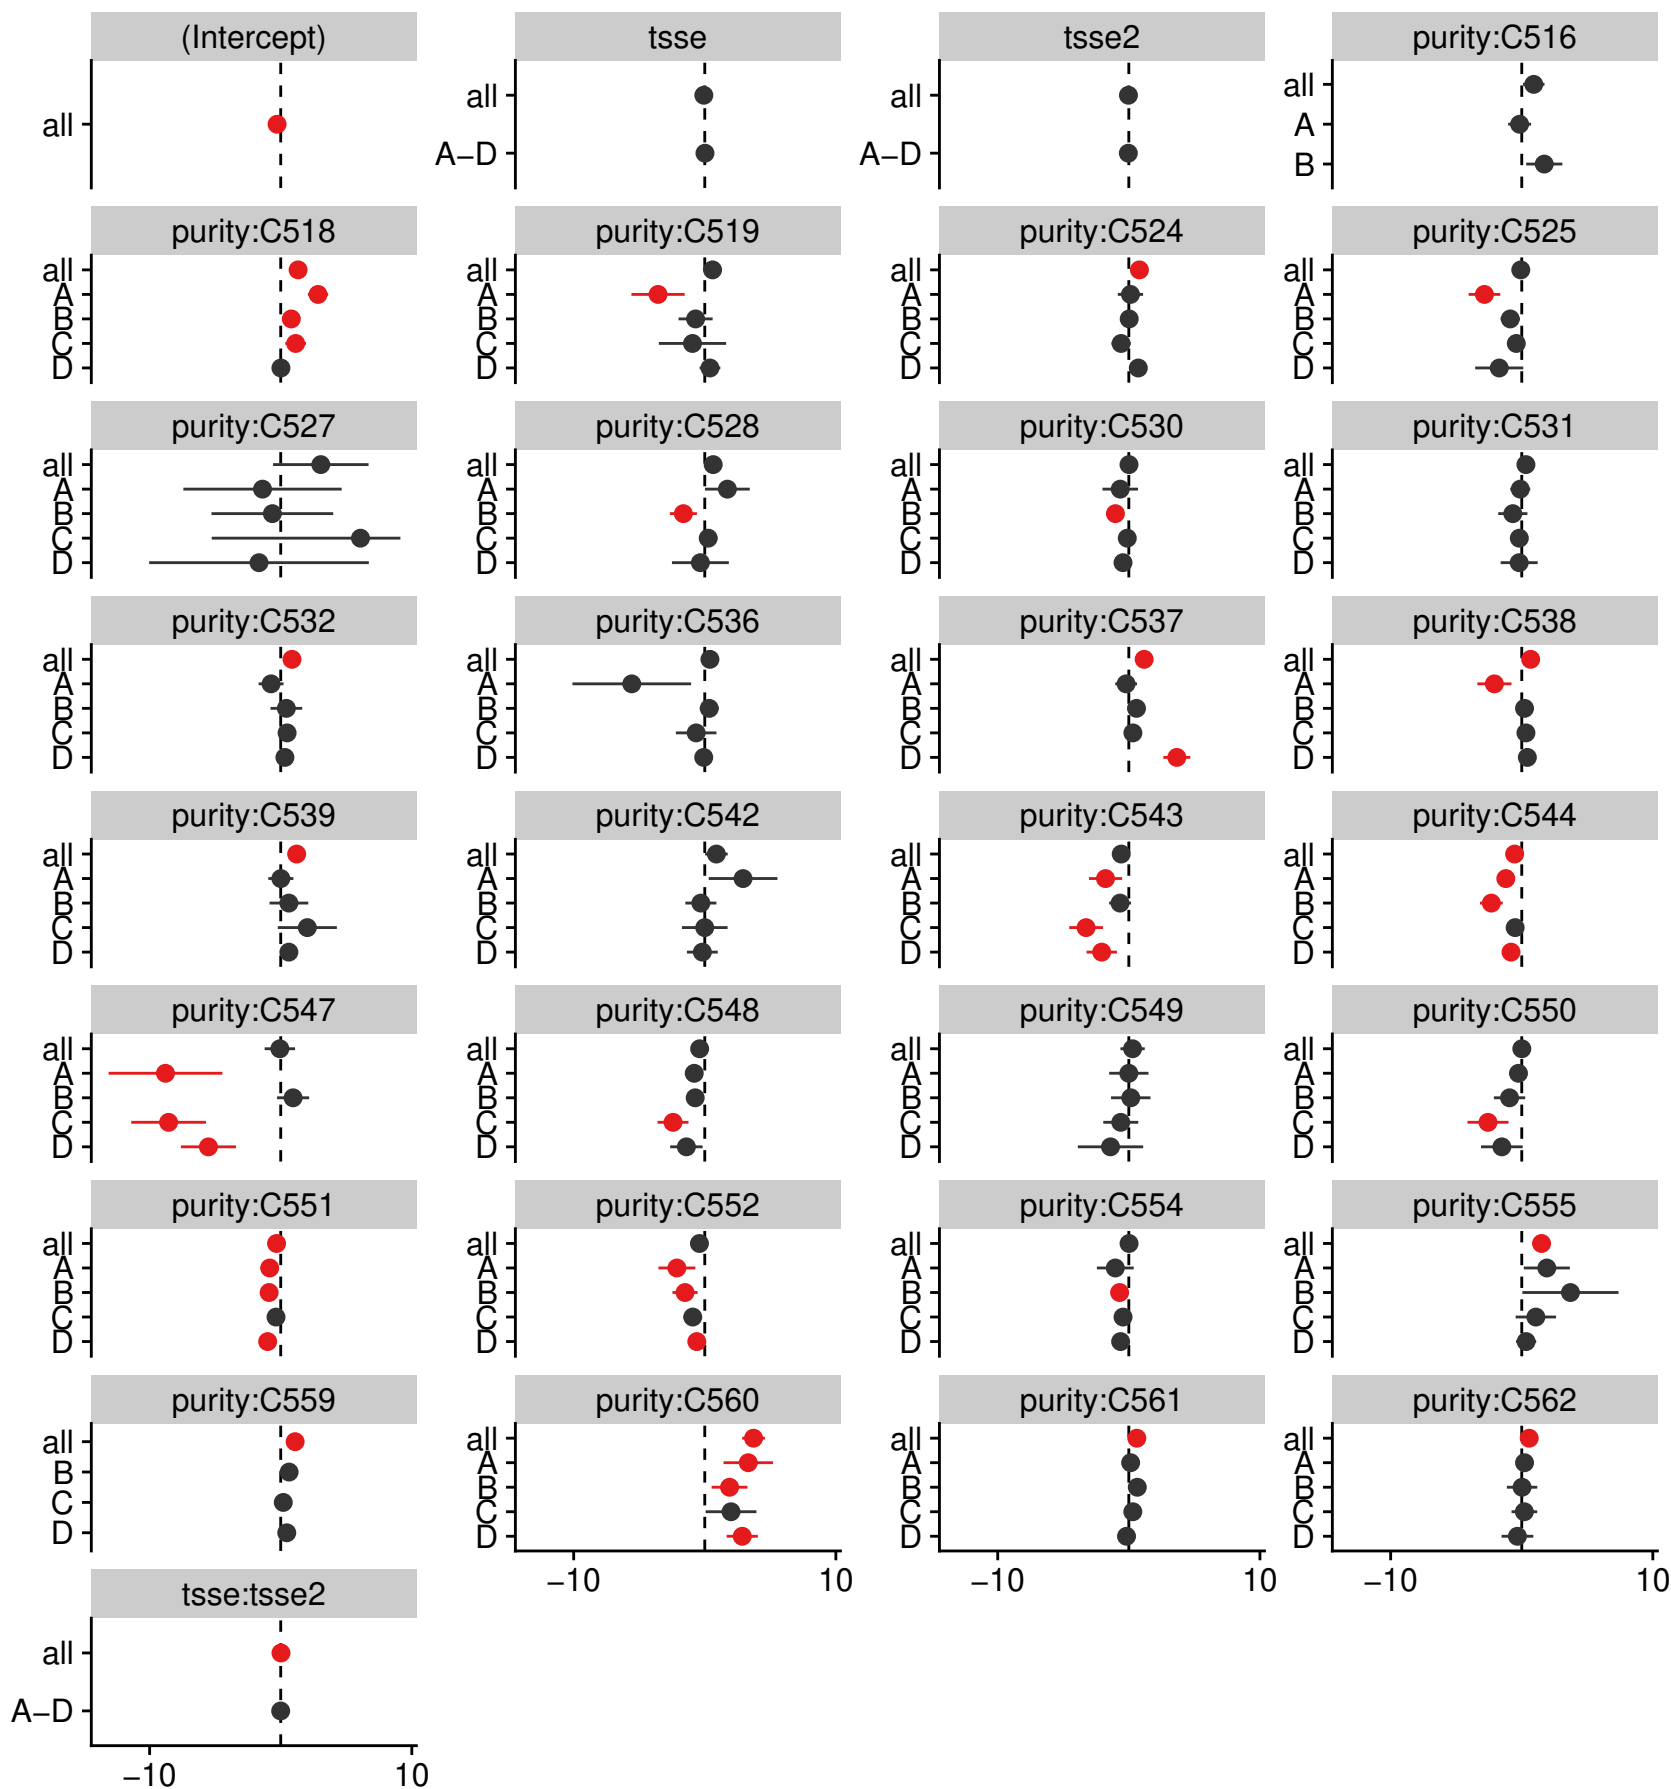

Coefficient

p\_c = < 2.22e-16, p\_sc = 3.6862e-15

# HHEX\_uc\_dTSS\_oPEAK

+ 10/33 (4/116), - 4/33 (23/116)

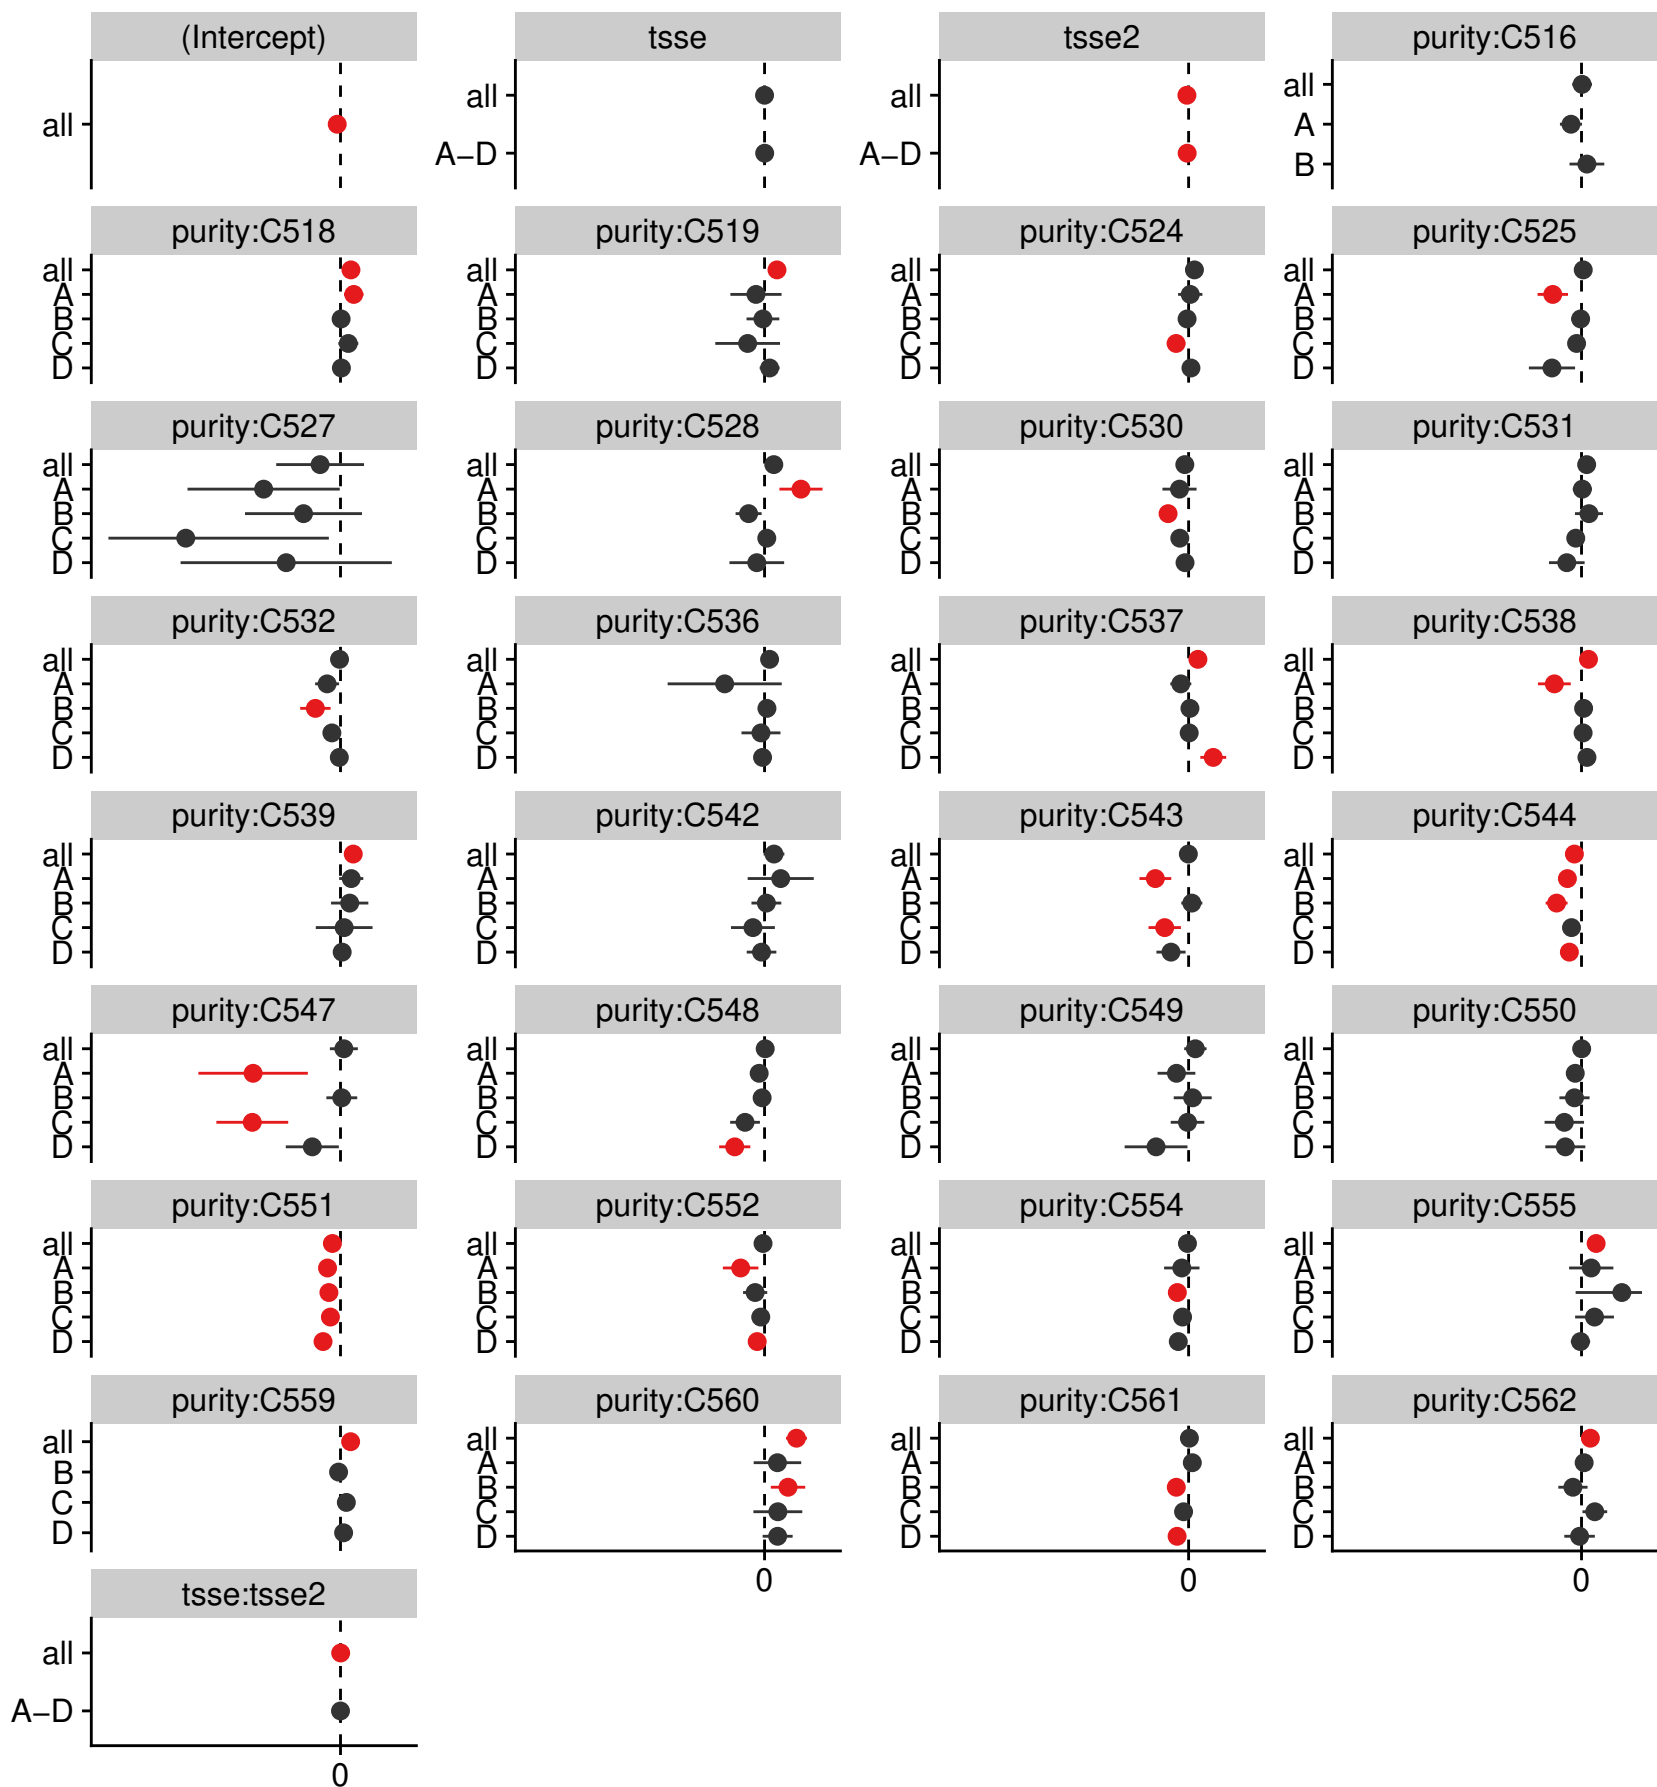

Coefficient

p\_c = < 2.22e-16, p\_sc = 3.4808e-06

# HLX\_uc\_cTSS\_nPEAK

+ 10/33 (1/116), - 4/33 (39/116)



$p_c = < 2.22e-16$ ,  $p_{sc} = 0.021685$

# HLX\_uc\_dTSS\_oPEAK

+ 12/33 (0/116), - 4/33 (42/116)



Coefficient

$p_c = < 2.22e-16$ ,  $p_{sc} = 0.019451$



# HMG20B\_uc\_dTSS\_nPEAK

+ 12/33 (11/116), - 1/33 (13/116)

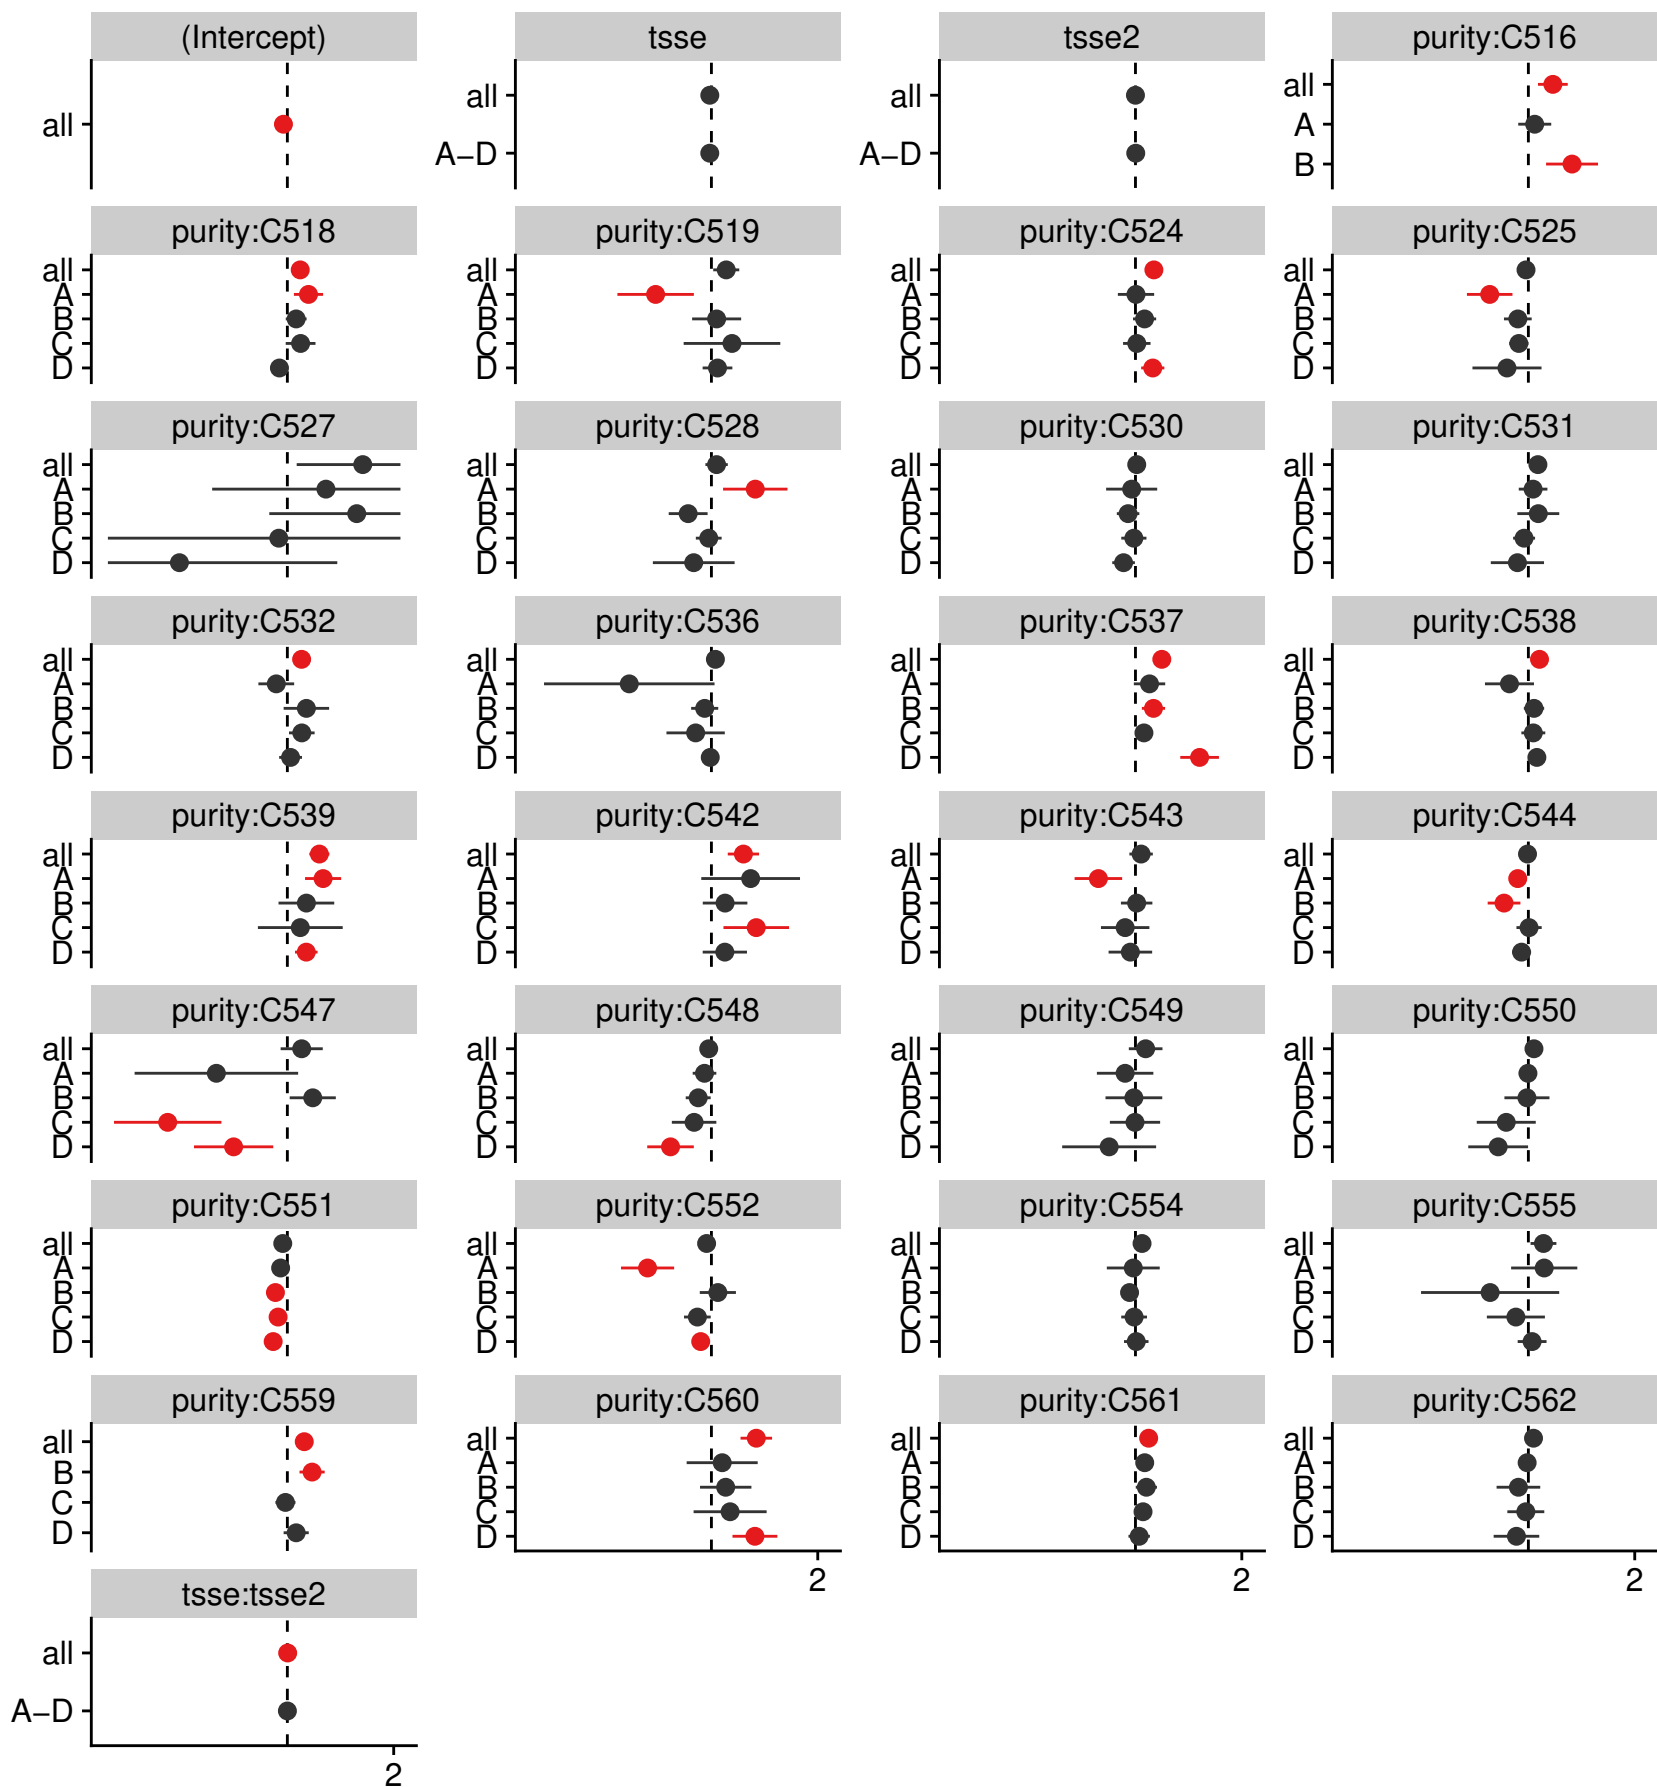

Coefficient

p\_c = < 2.22e-16, p\_sc = 1.7684e-07

# HMGA1\_uc\_pTSS\_nPEAK

+ 12/33 (3/116), - 5/33 (49/116)

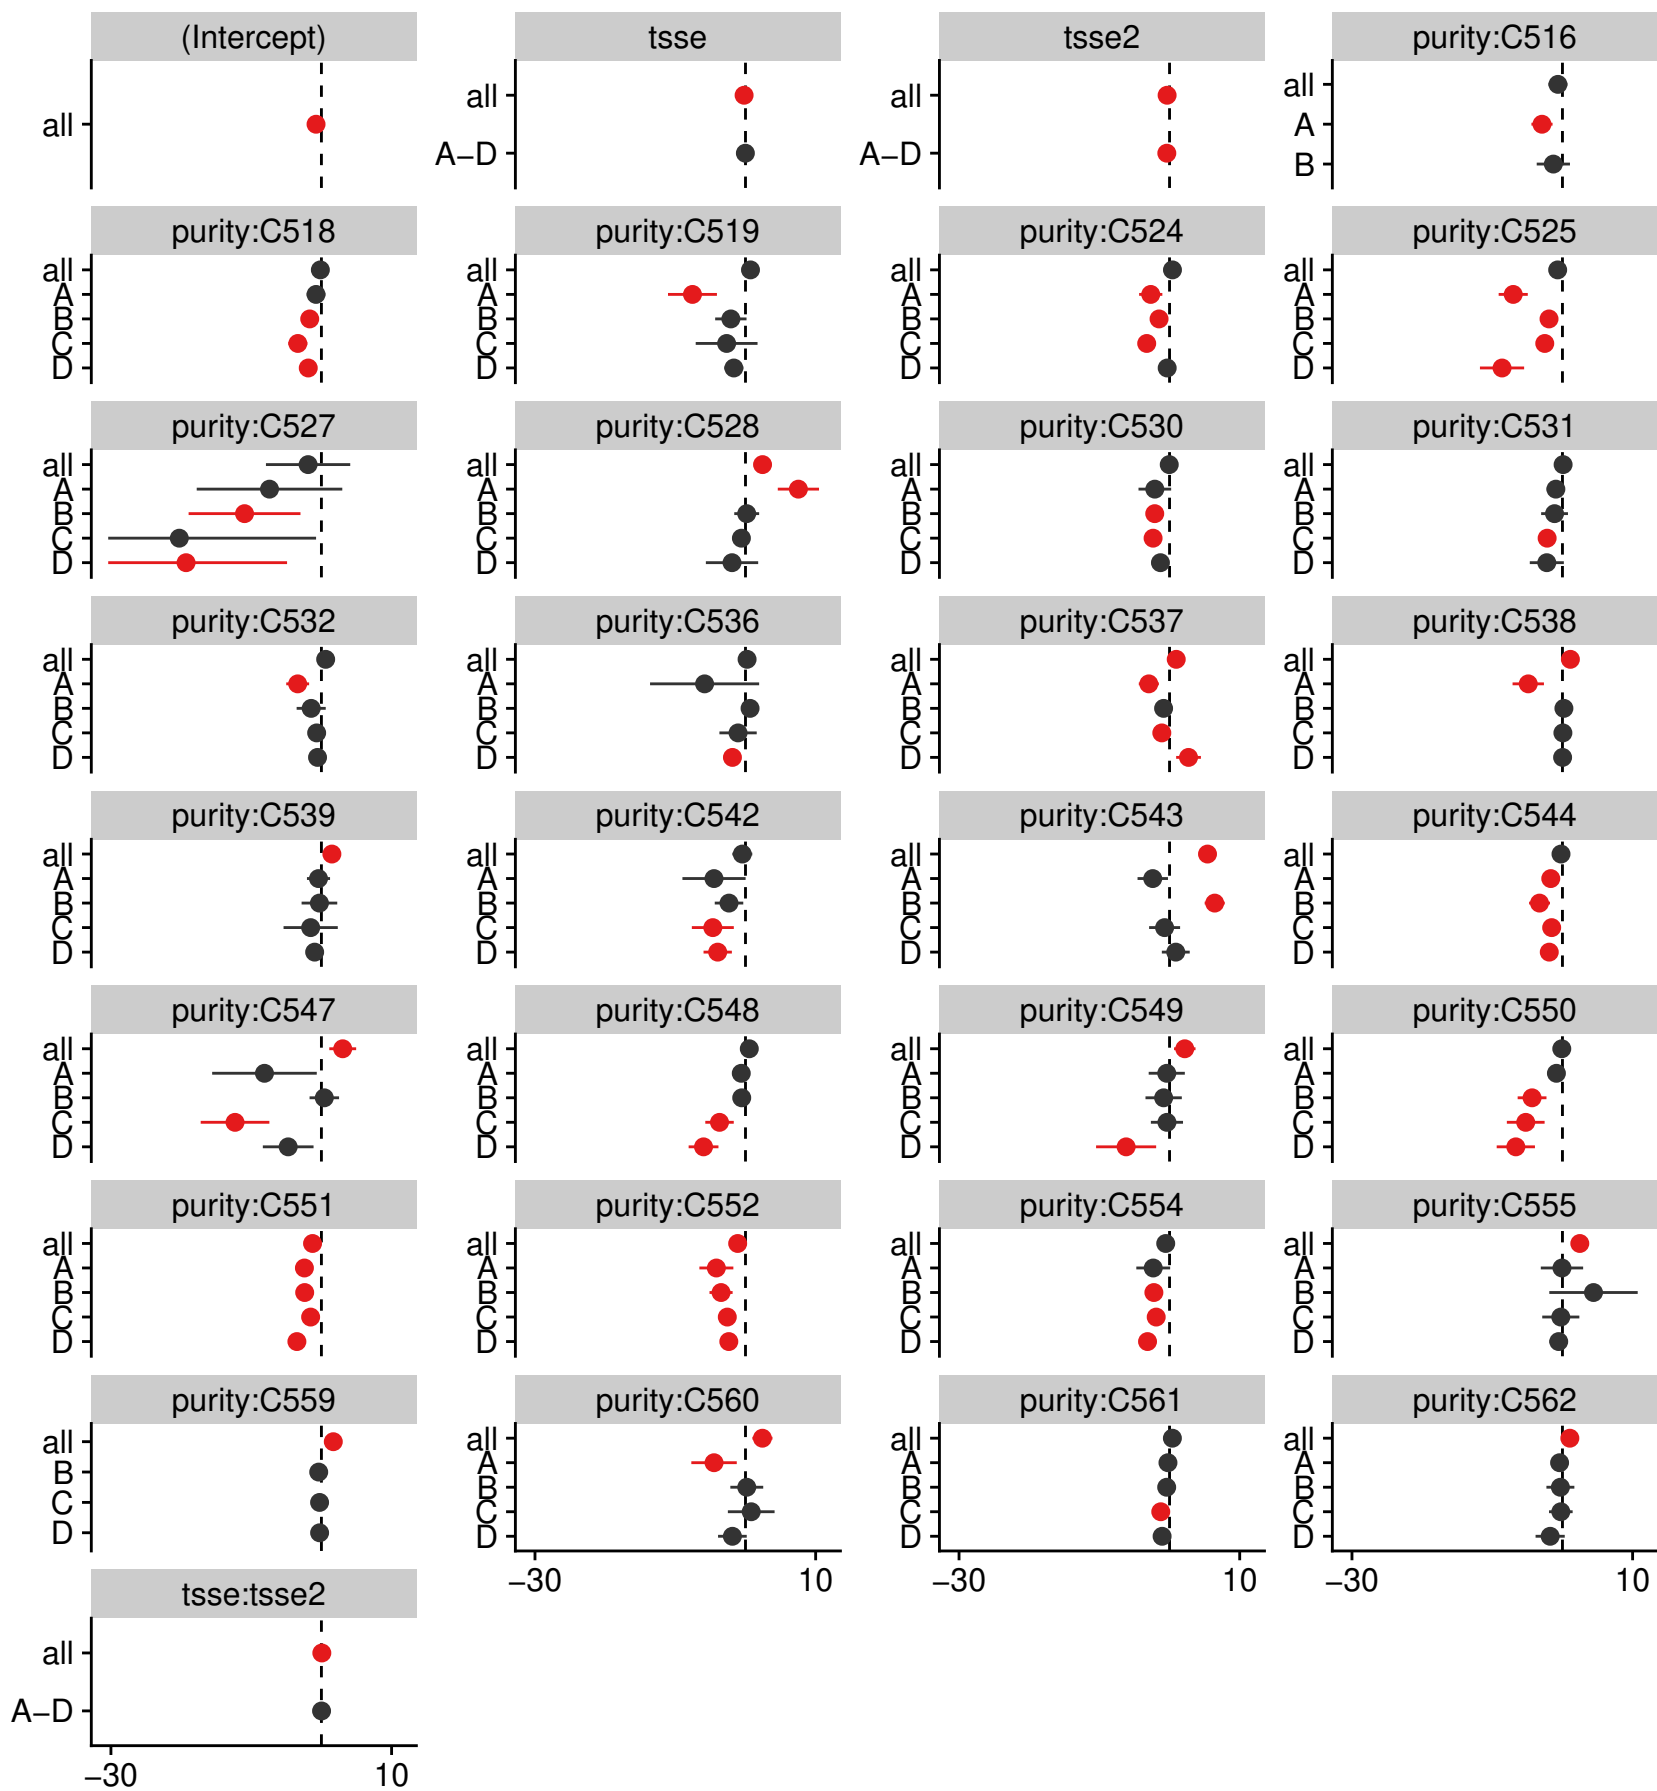

p\_c = < 2.22e-16, p\_sc = 6.7079e-07

# HOXA11\_uc\_cTSS\_nPEAK

+ 11/33 (2/116), - 5/33 (42/116)

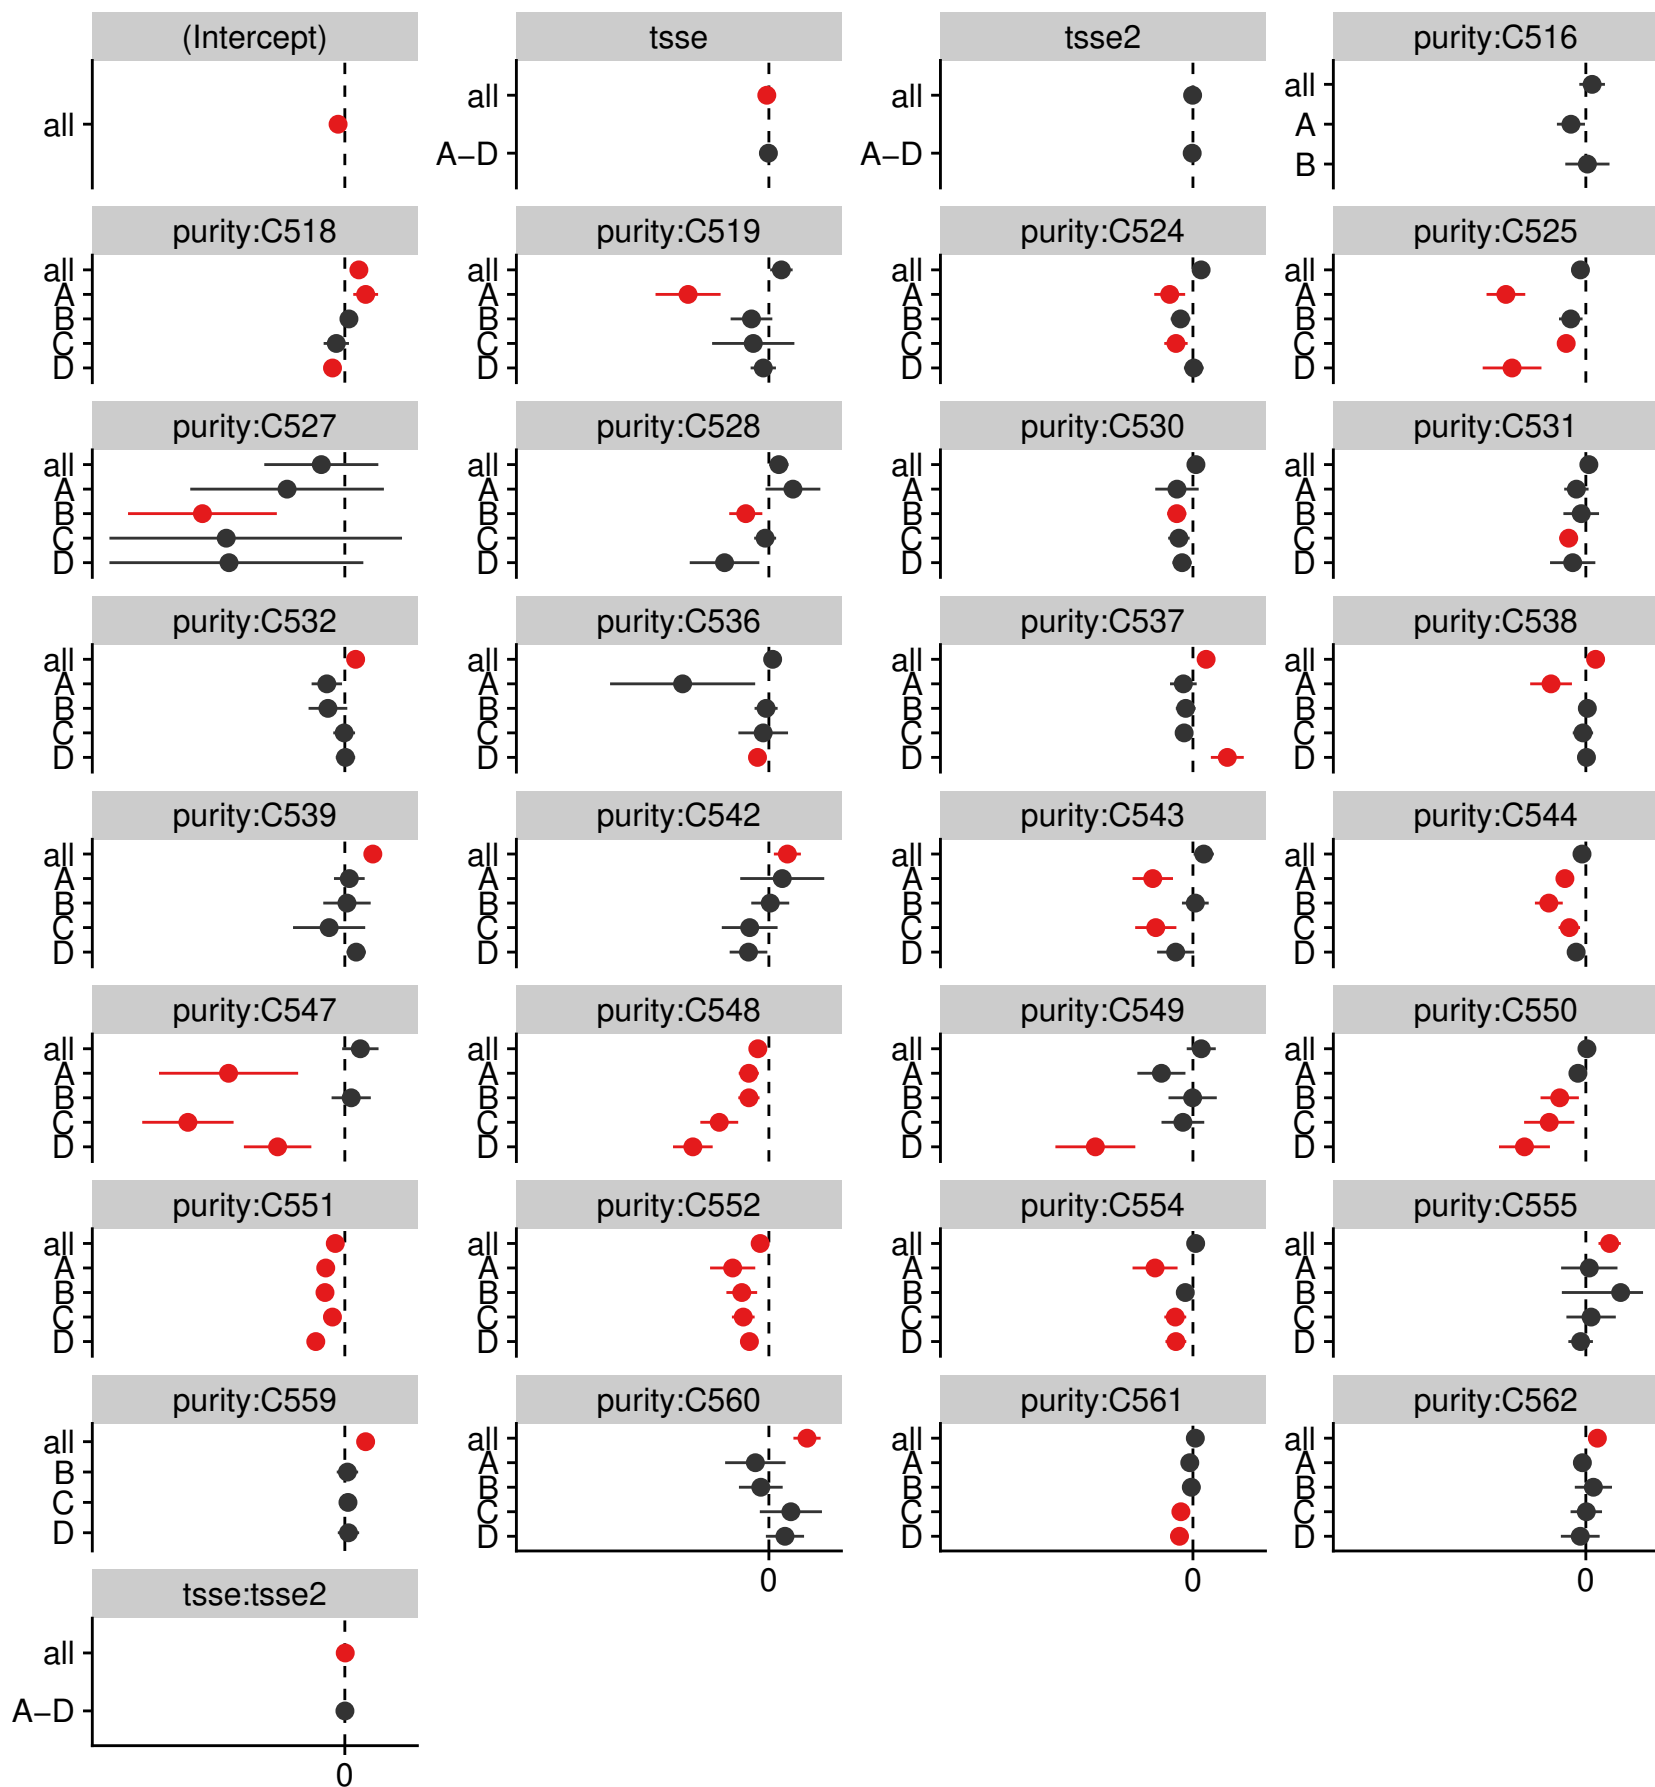

Coefficient

p\_c = < 2.22e-16, p\_sc = 3.9411e-10

# HOXA11\_uc\_dTSS\_nPEAK

+ 13/33 (2/116), - 4/33 (41/116)

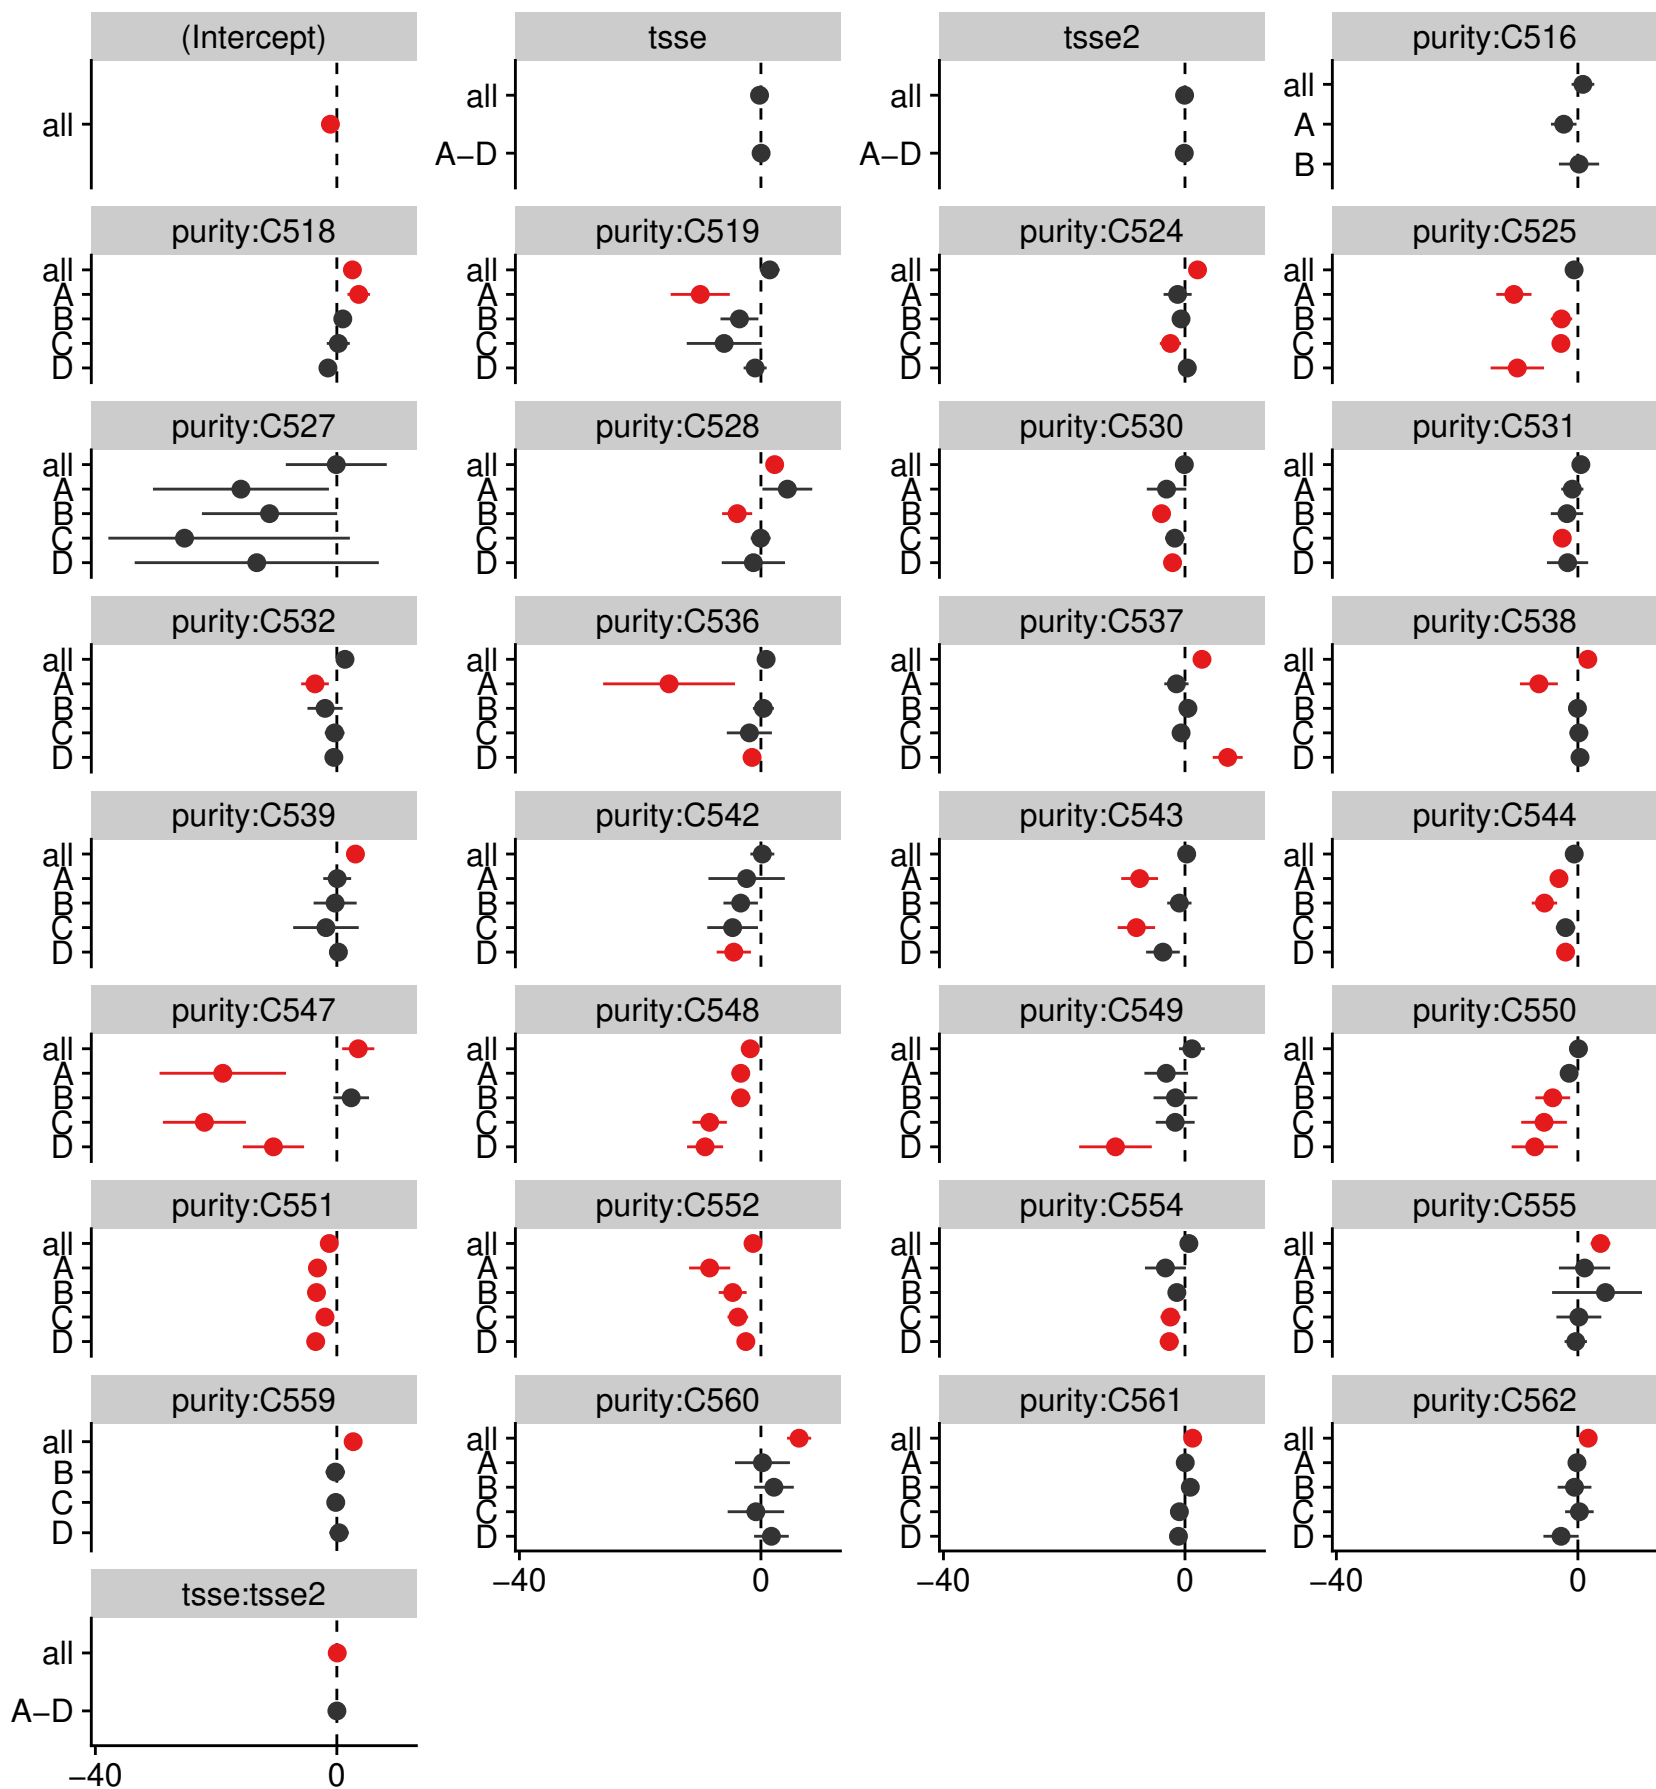

Coefficient

p\_c = < 2.22e-16, p\_sc = 2.2981e-05

# HOXA2\_uc\_dTSS\_nPEAK

+ 14/33 (1/116), - 4/33 (42/116)

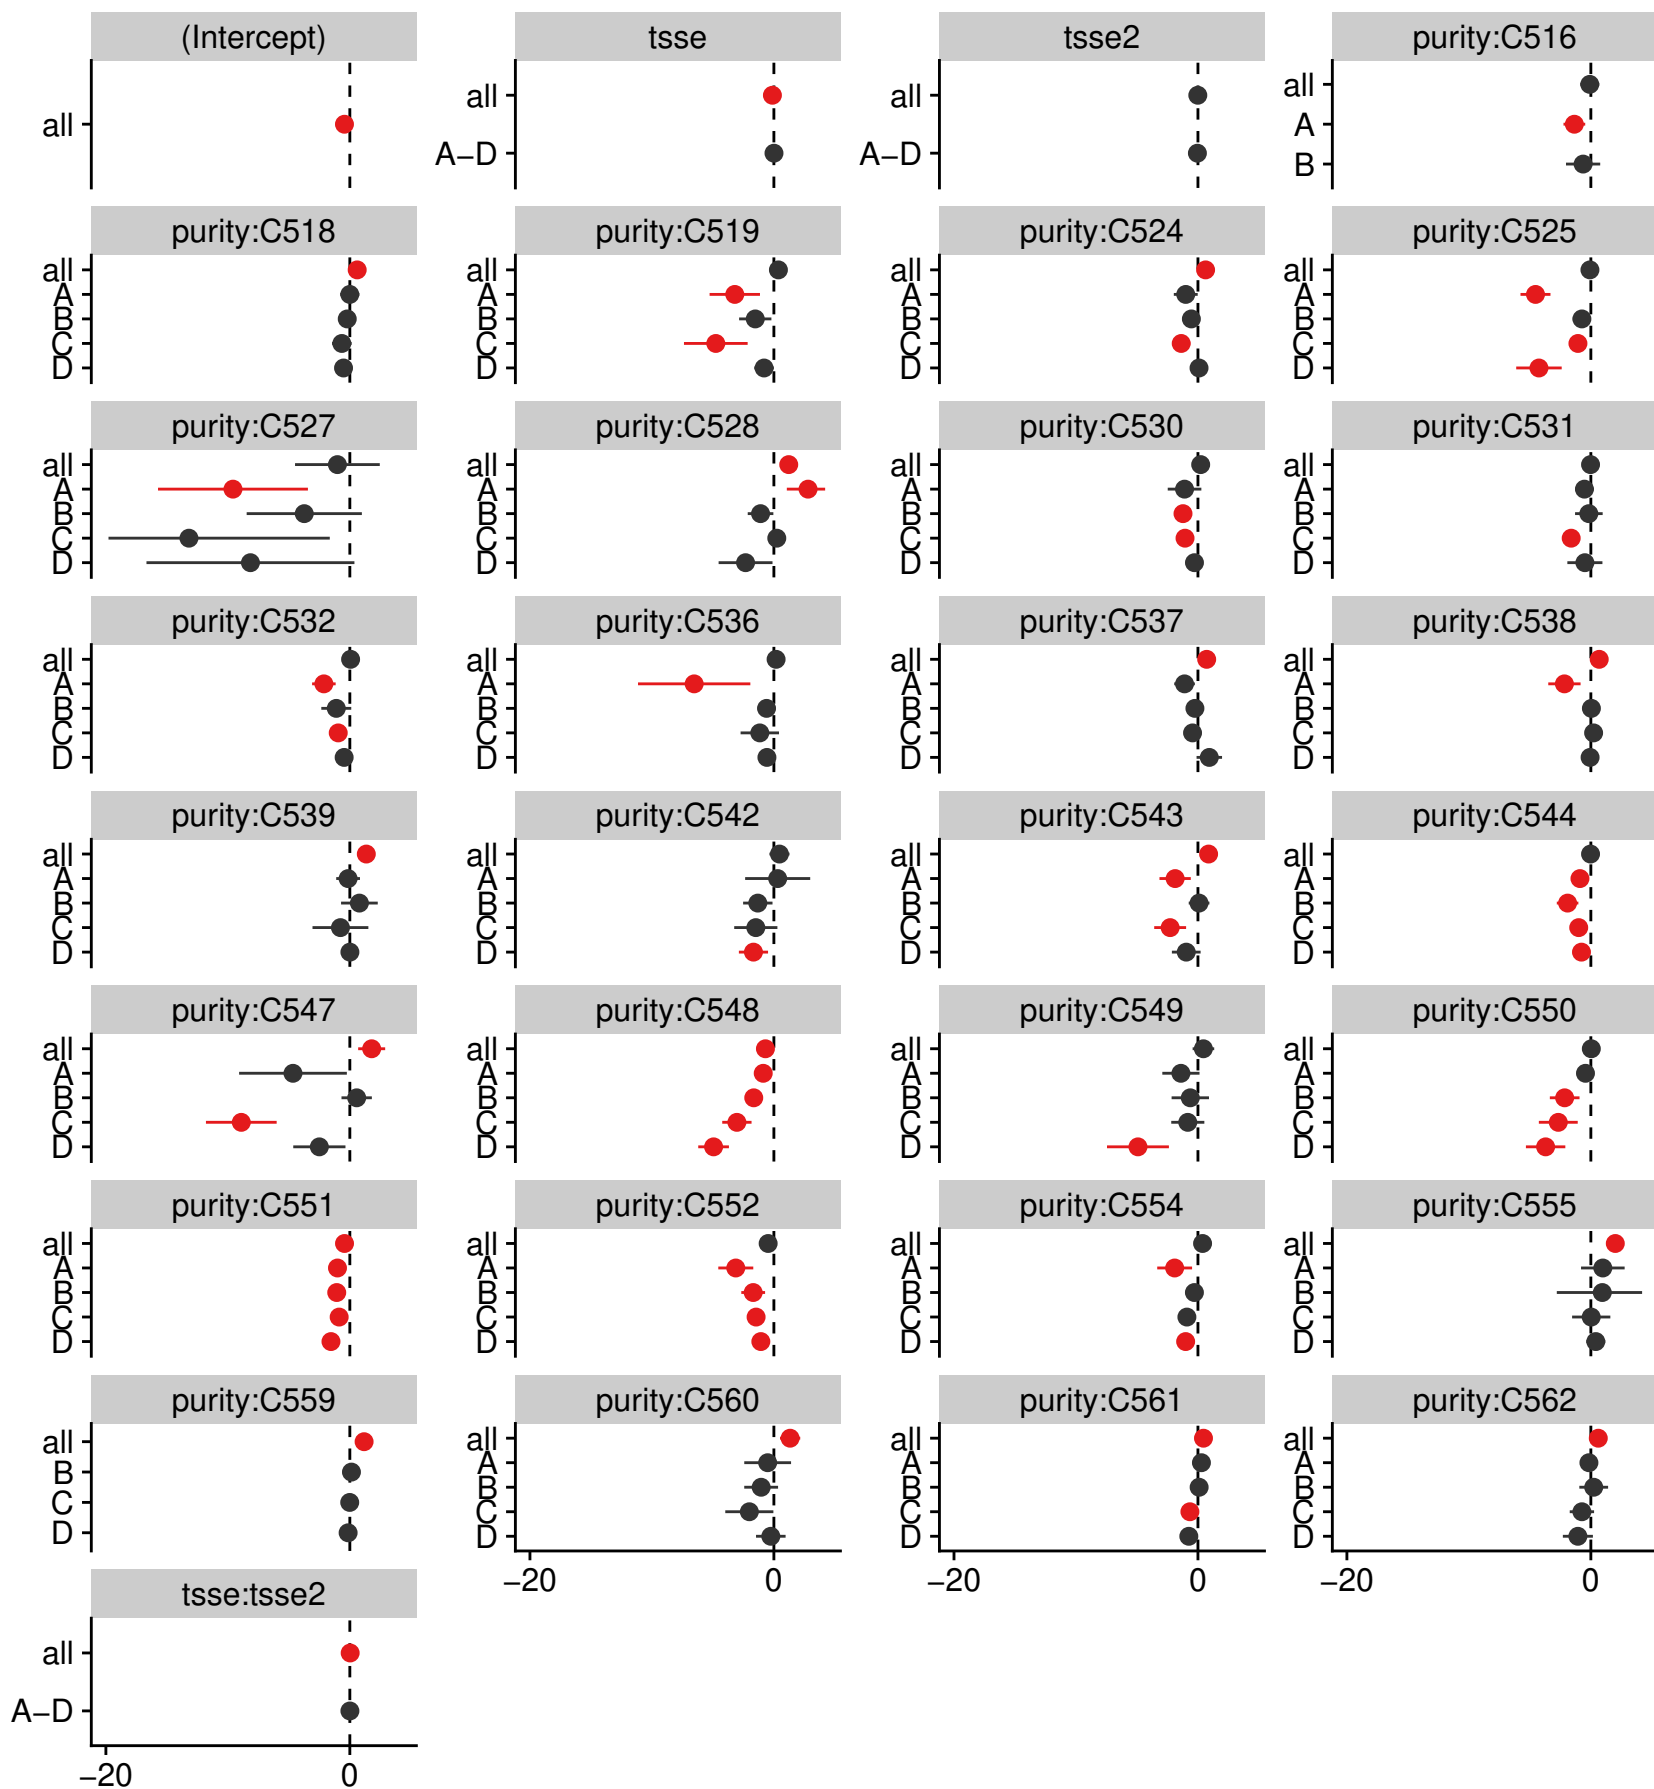

$p_c = < 2.22e-16$ ,  $p_{sc} = 0.0027777$

# HOXA4\_uc\_cTSS\_nPEAK

+ 10/33 (1/116), - 4/33 (39/116)

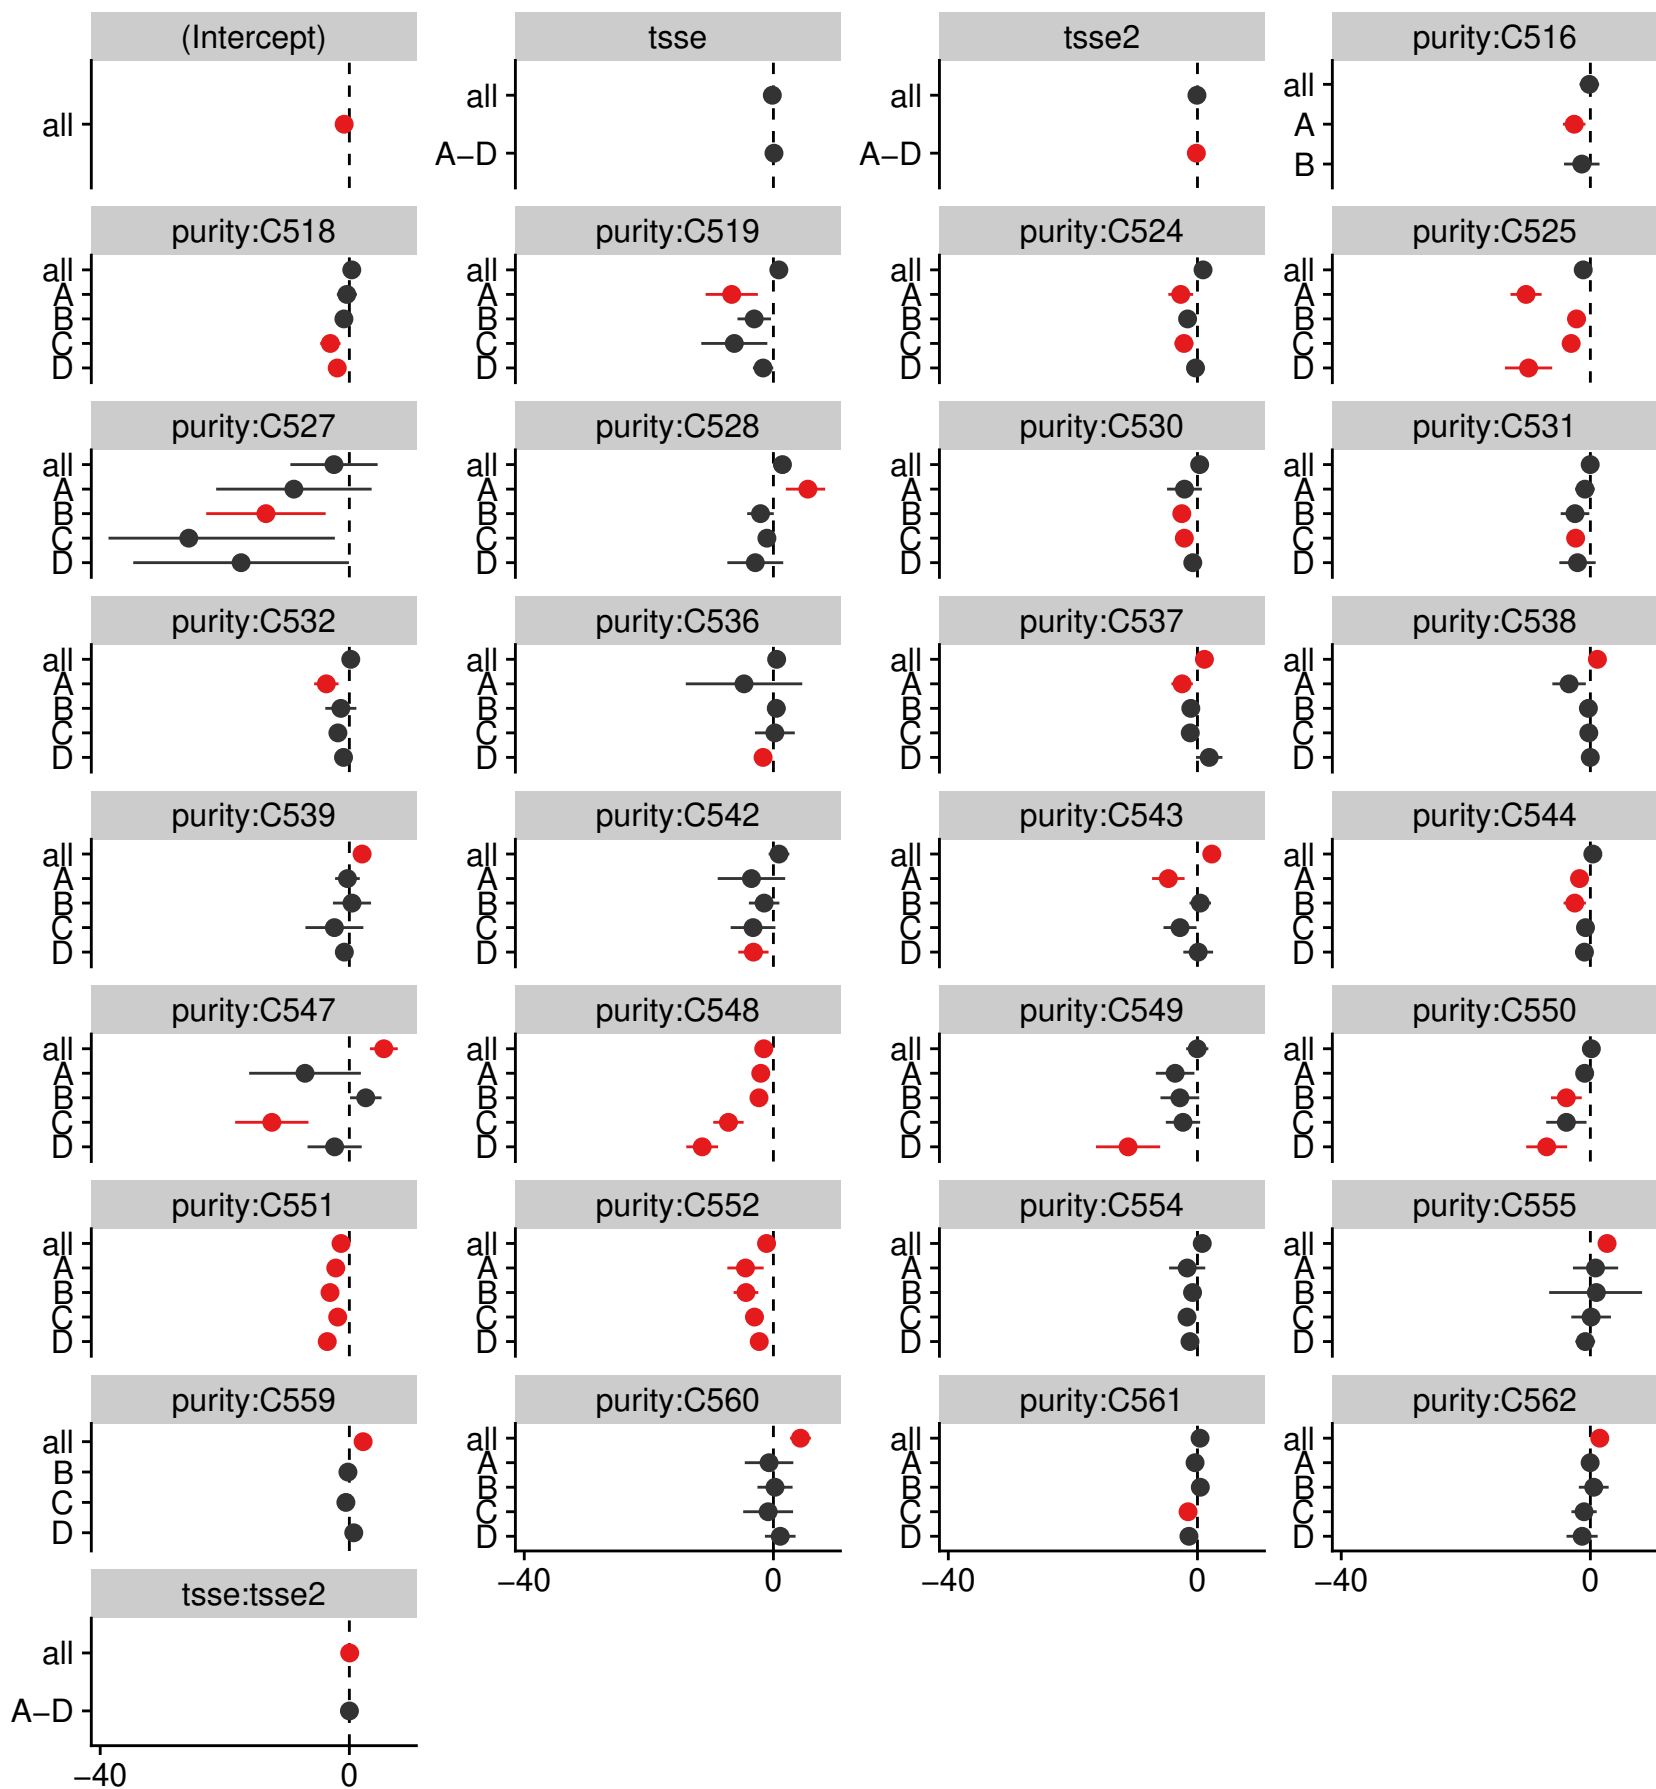

$p_c = < 2.22e-16$ ,  $p_{sc} = 0.021685$

# HOXA4\_uc\_cTSS\_oPEAK

+ 12/33 (0/116), - 3/33 (37/116)

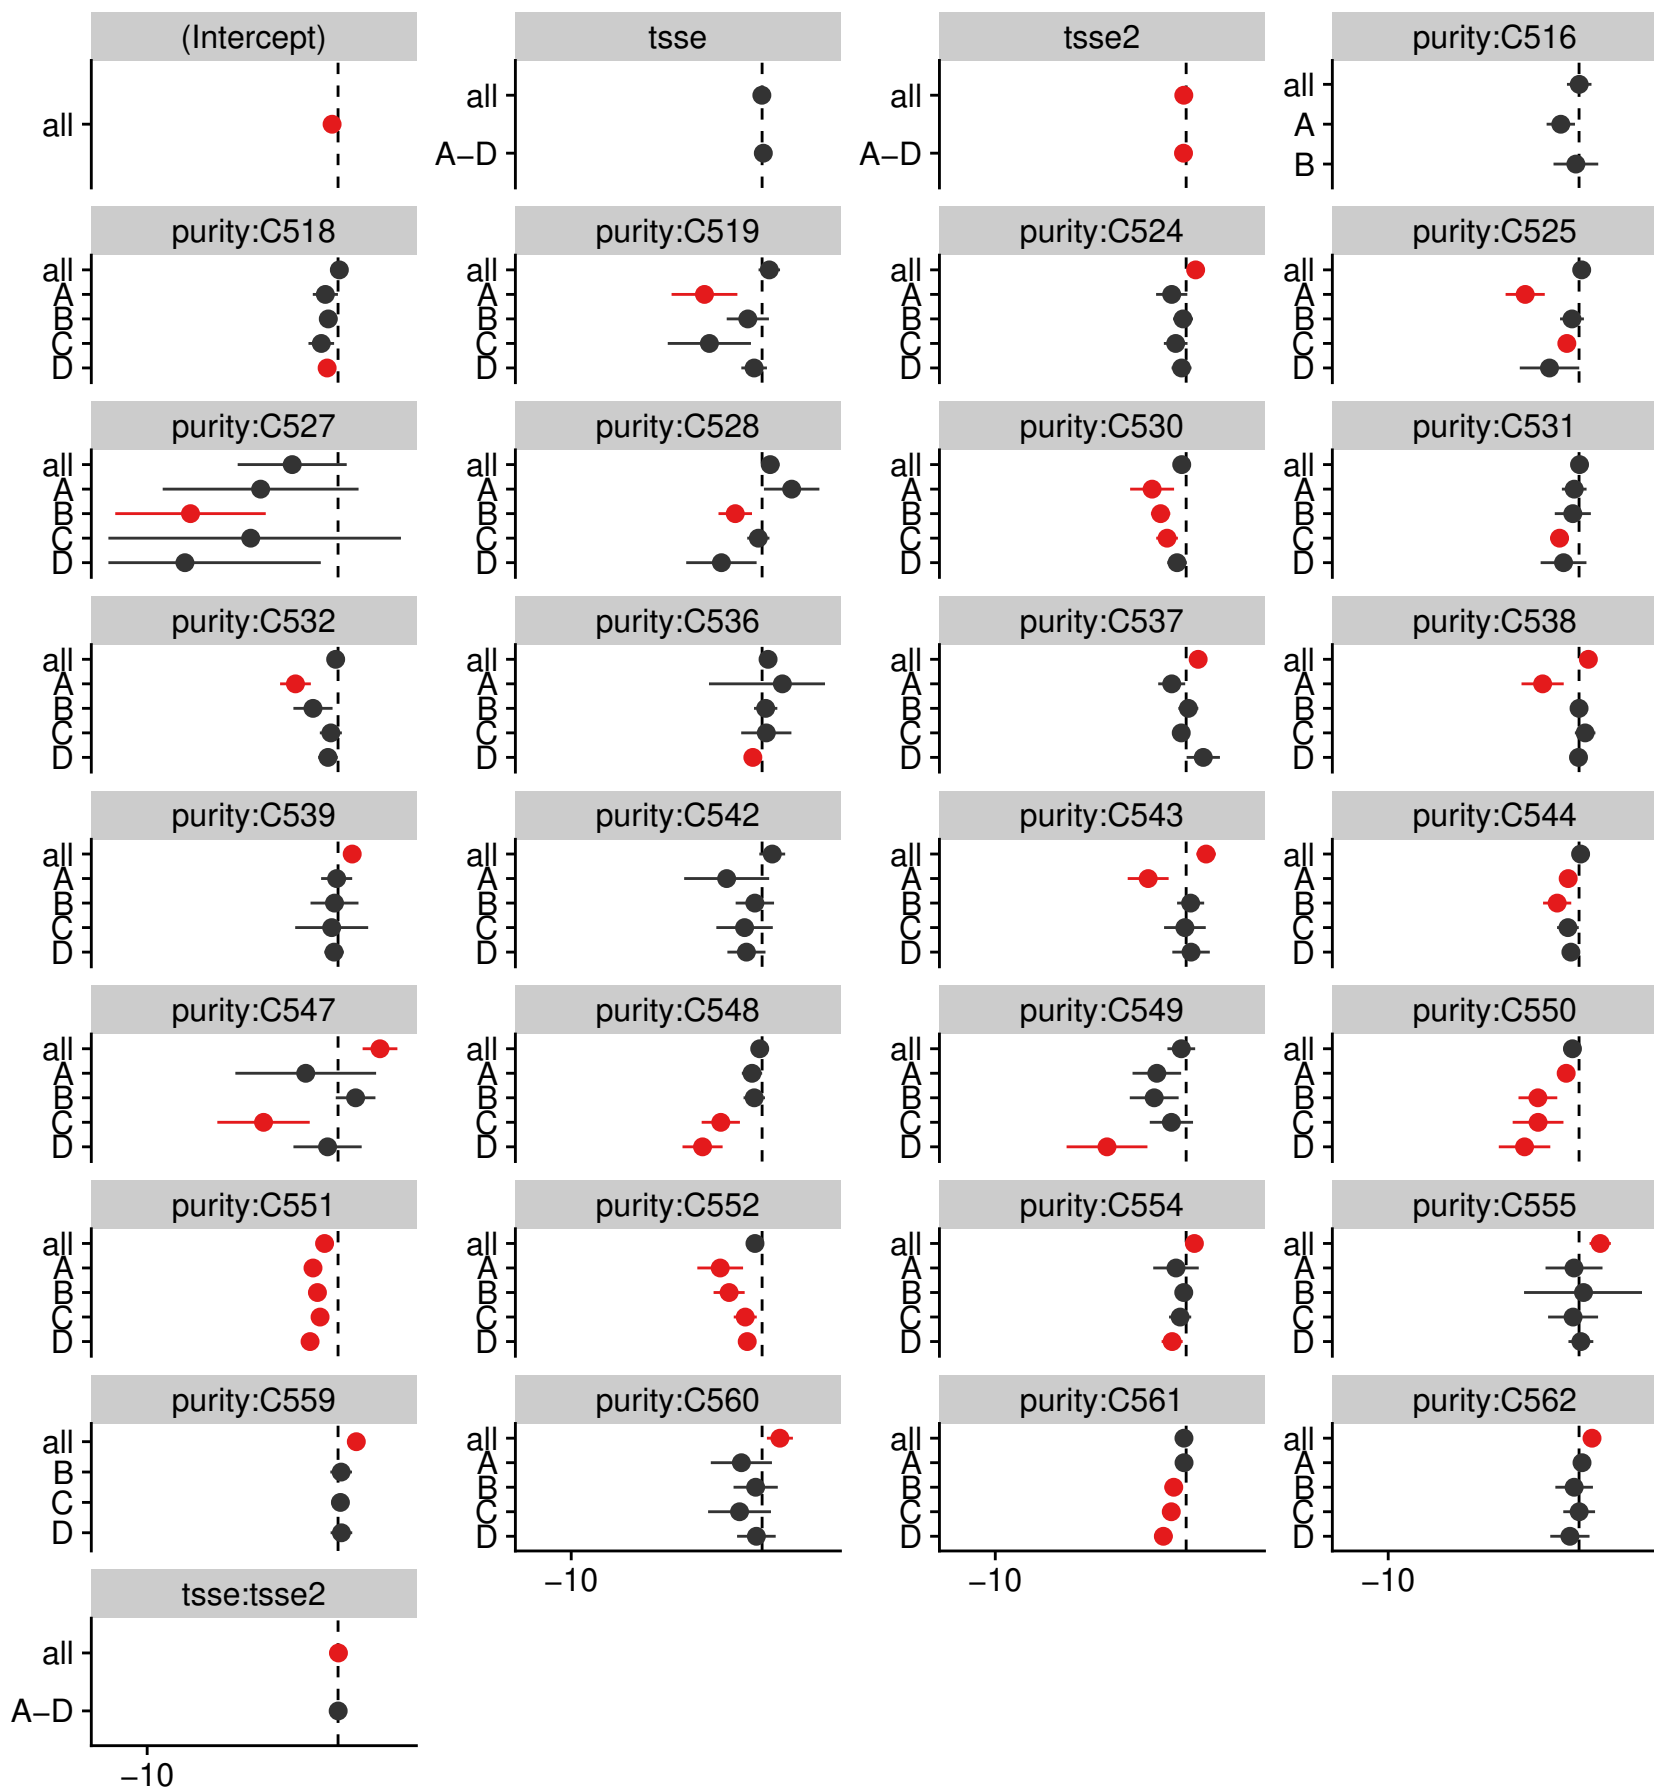

Coefficient

p\_c = < 2.22e-16, p\_sc = 0.11442

# HOXA4\_uc\_dTSS\_oPEAK

+ 12/33 (0/116), - 4/33 (42/116)



Coefficient

p\_c = < 2.22e-16, p\_sc = 0.019451



# HOXB4\_uc\_dTSS\_nPEAK

+ 12/33 (2/116), - 4/33 (43/116)

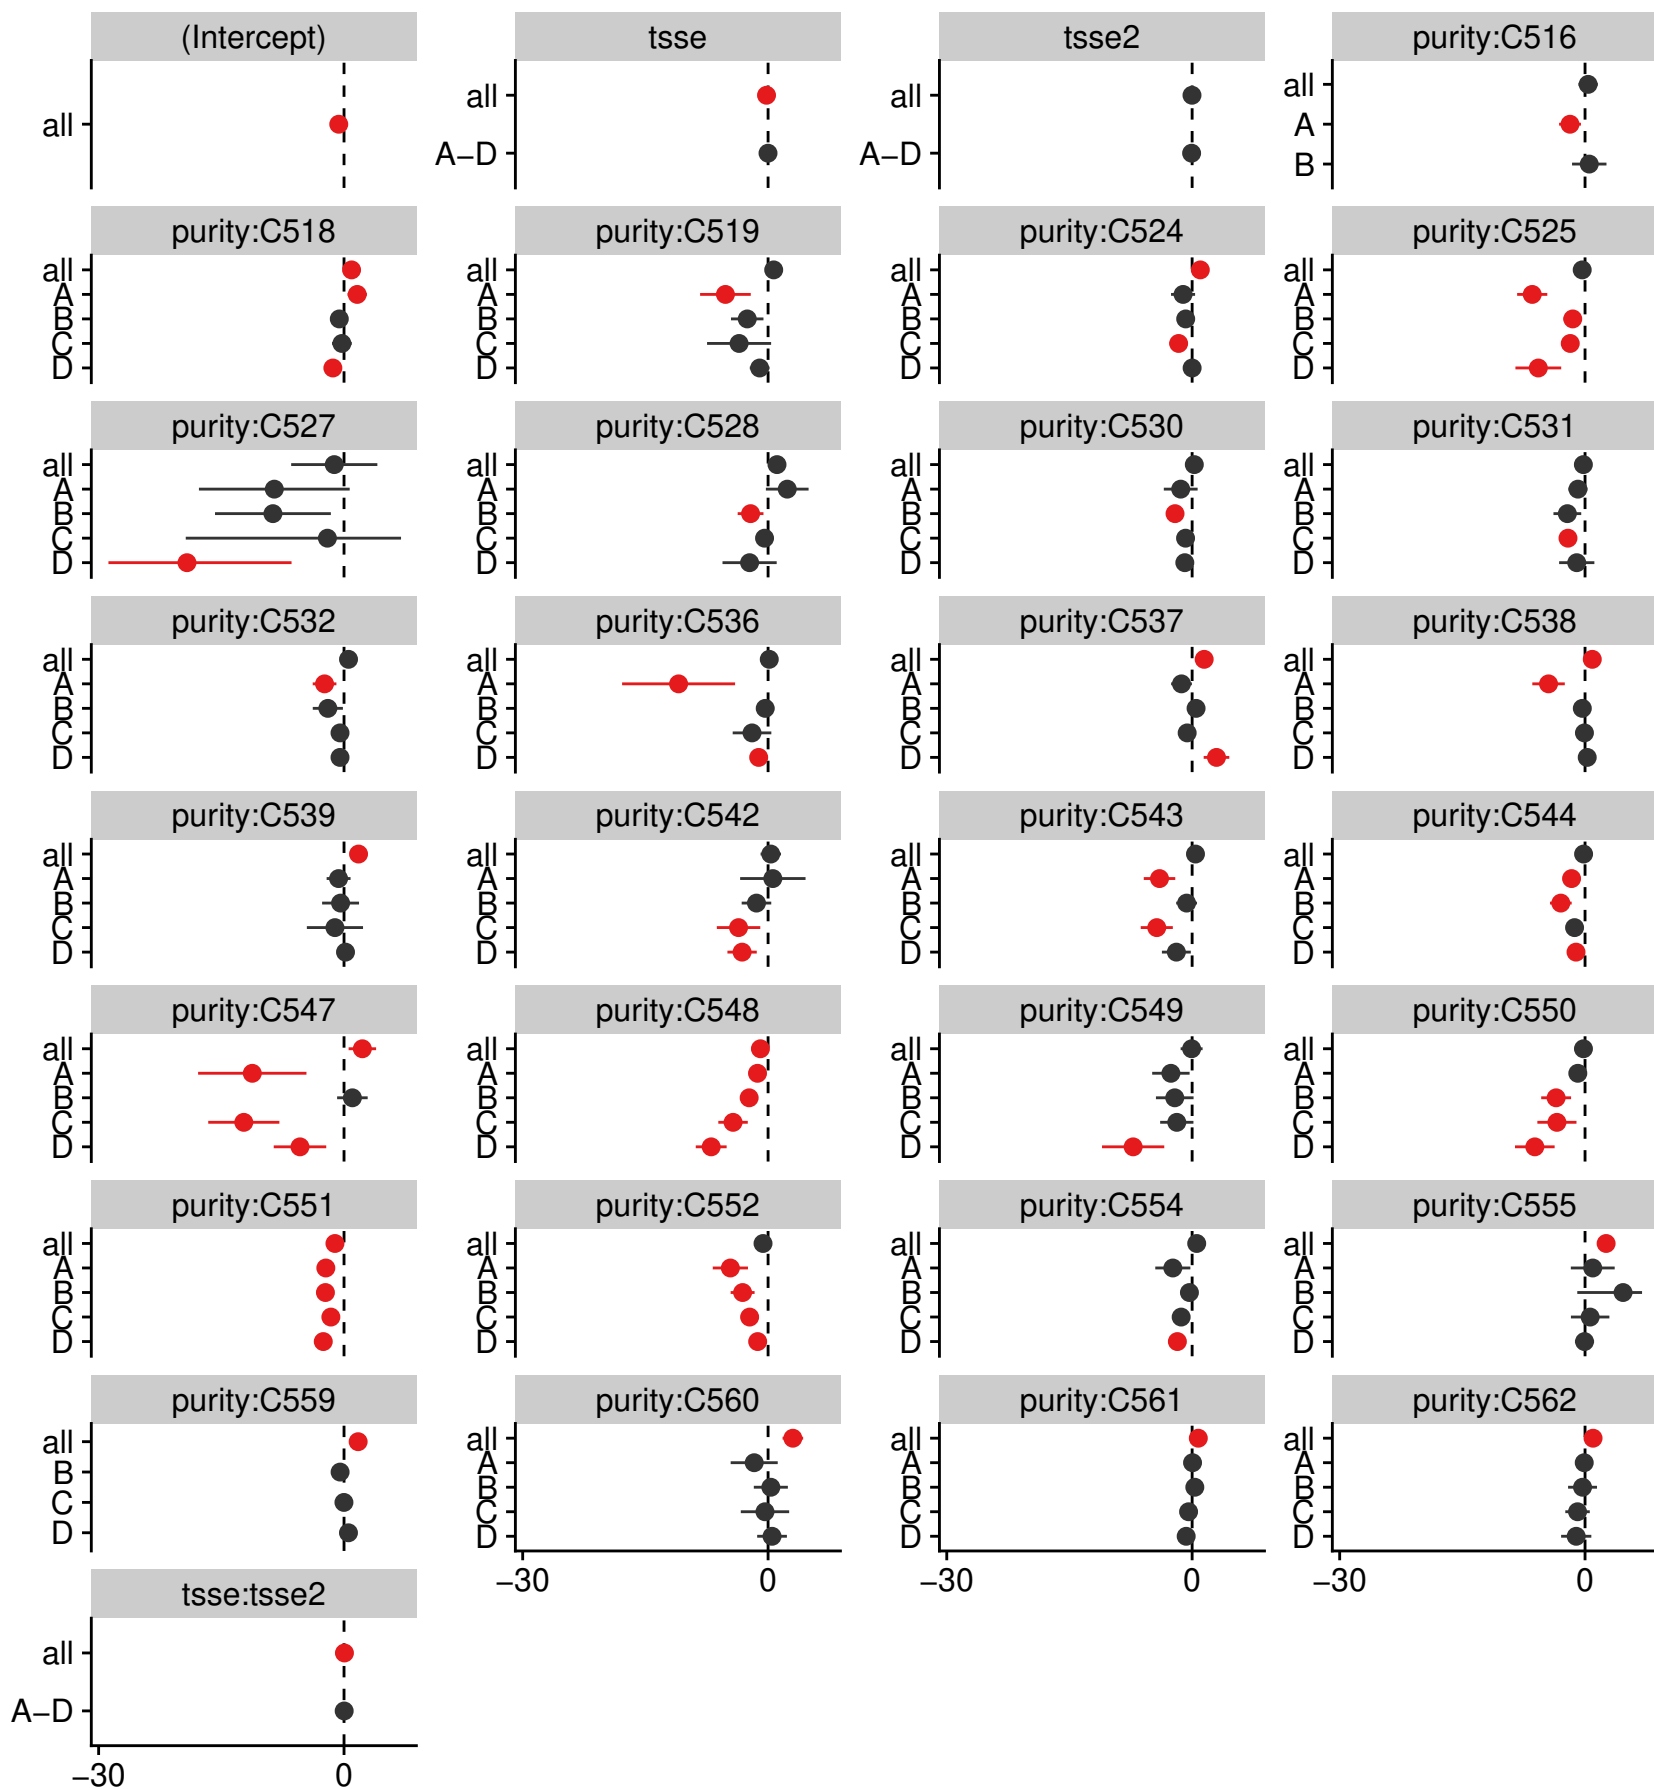

p\_c = < 2.22e-16, p\_sc = 7.8867e-05

# HOXB4\_uc\_dTSS\_oPEAK

+ 10/33 (2/116), - 3/33 (39/116)

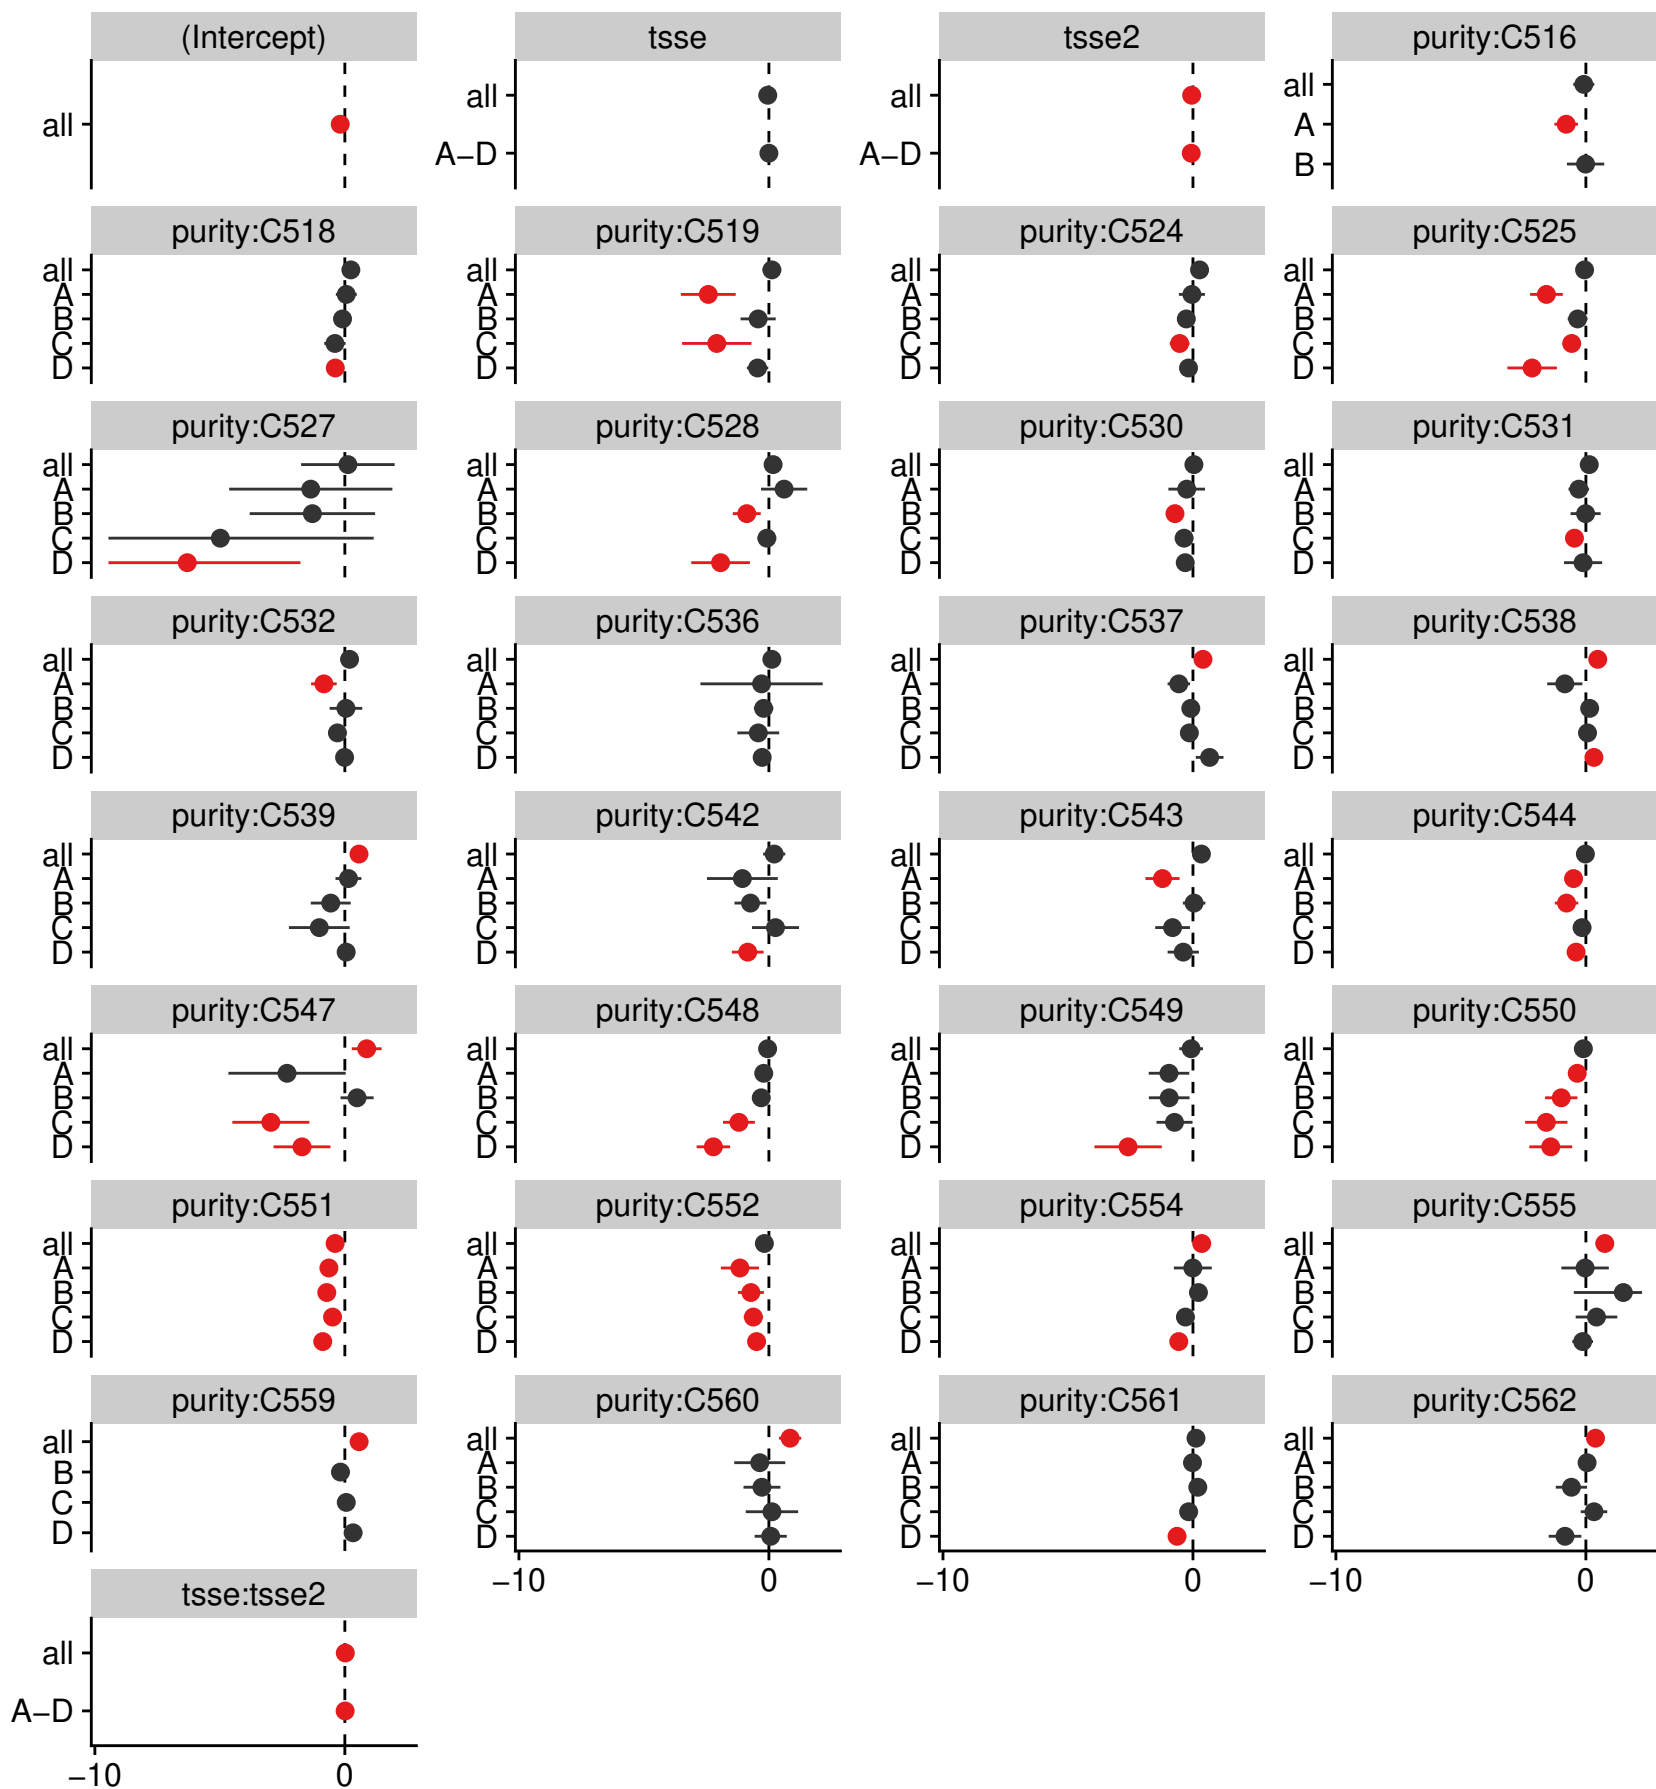

p\_c = < 2.22e-16, p\_sc = 3.5115e-05

# HOXC12\_uc\_dTSS\_nPEAK

+ 11/33 (1/116), - 3/33 (37/116)

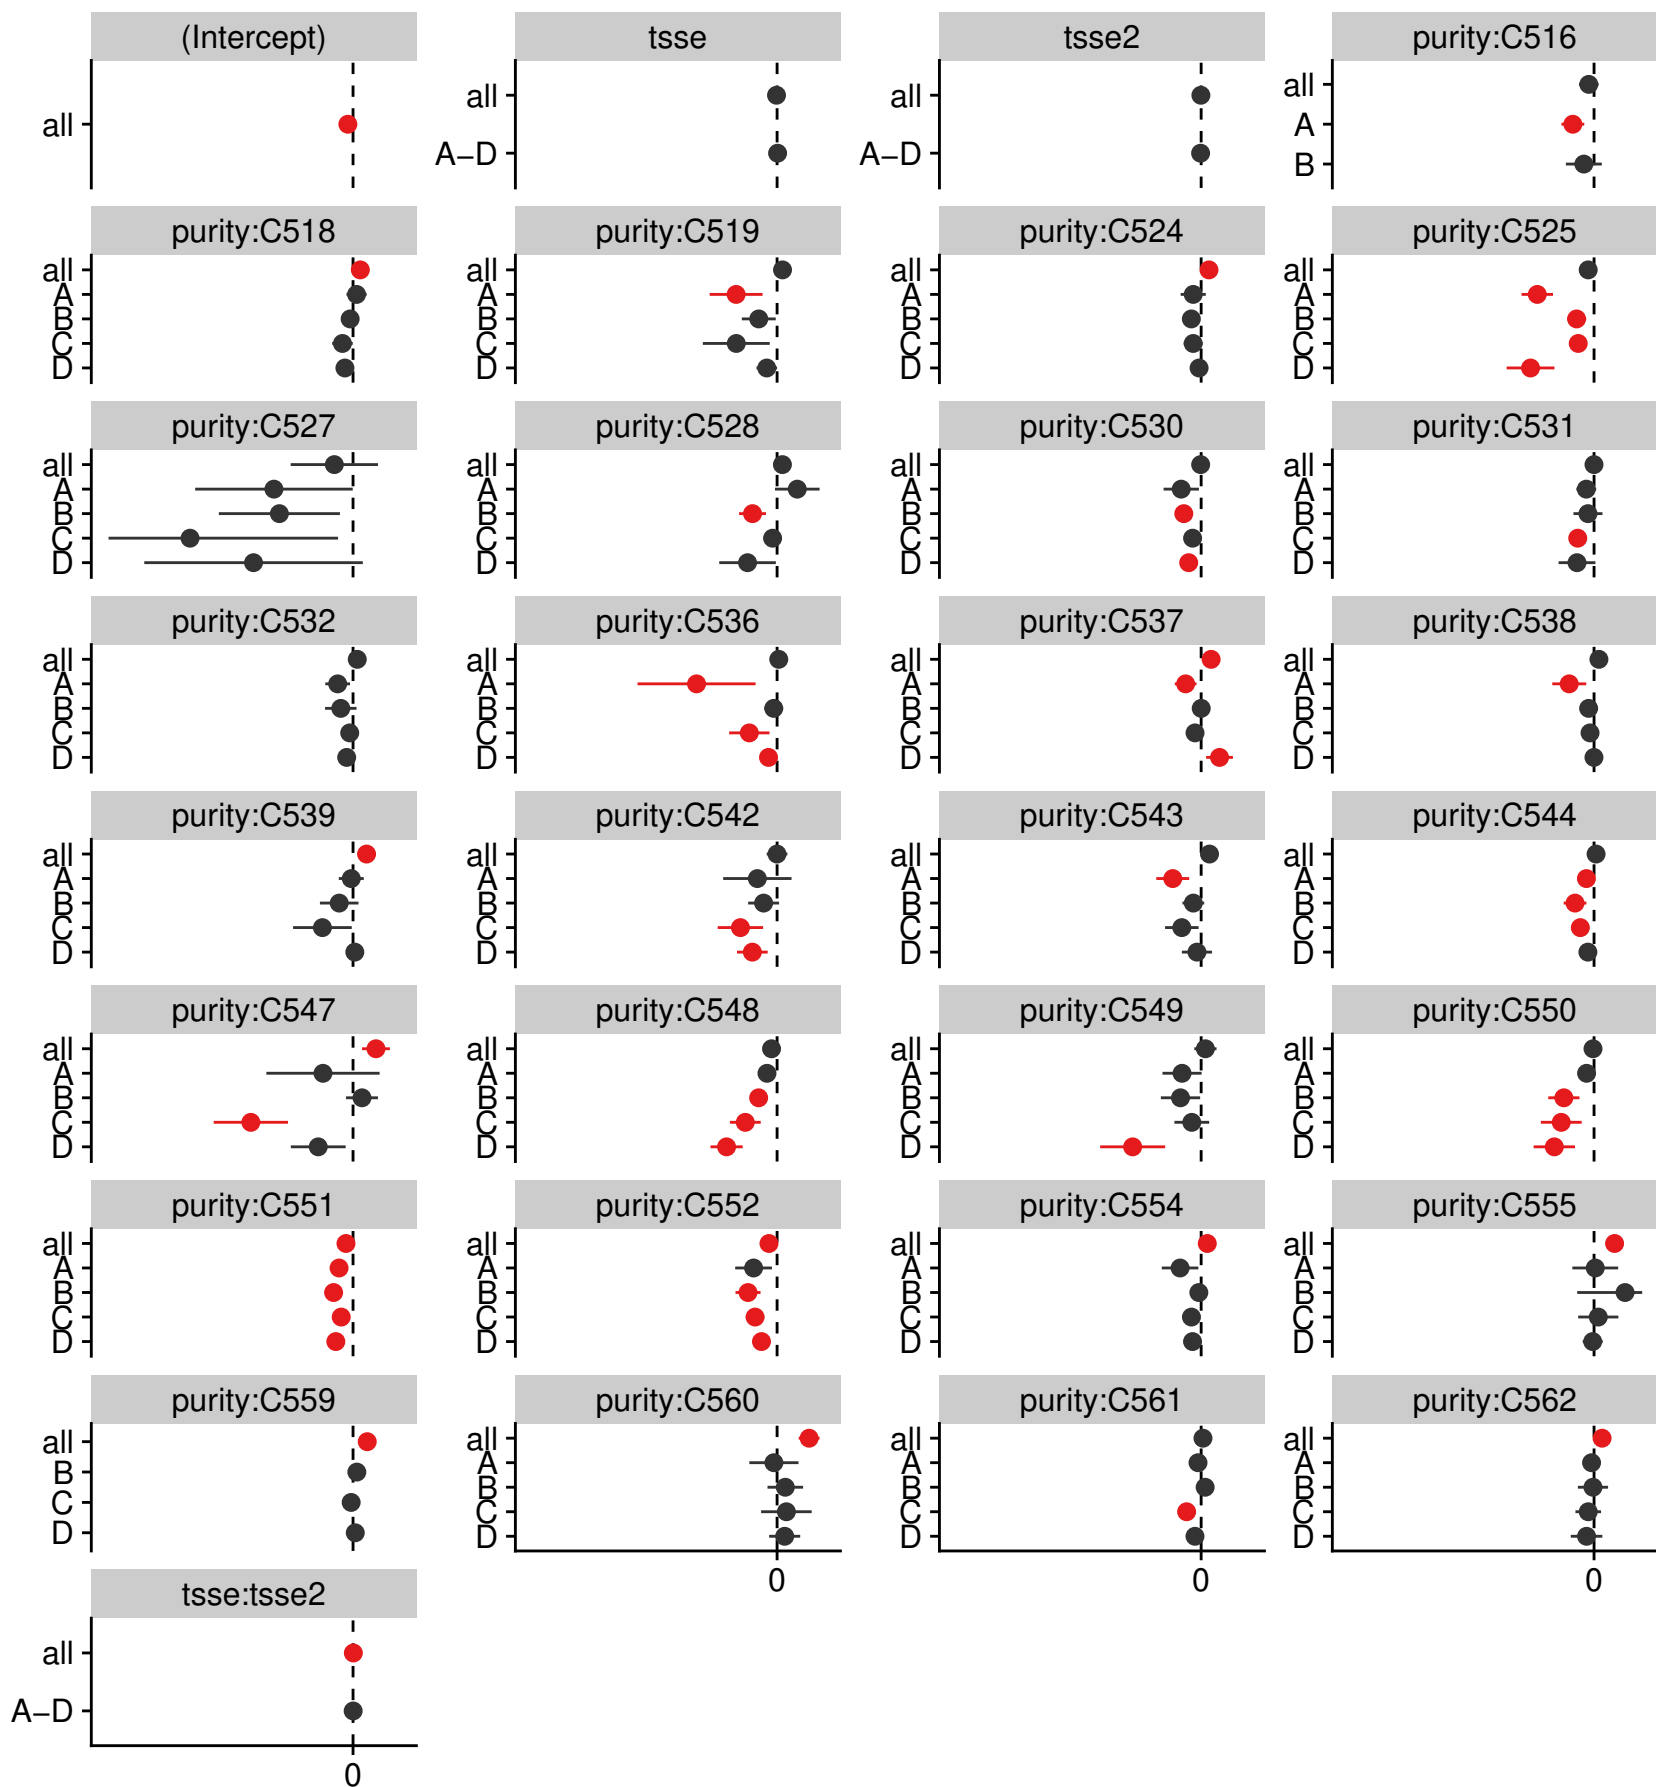

p\_c = < 2.22e-16, p\_sc = 0.25693

$$+ 12/33 (2/116), - 4/33 (43/116)$$
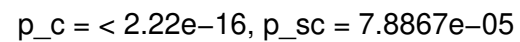

# HOXD12\_uc\_dTSS\_nPEAK

+ 11/33 (1/116), - 3/33 (37/116)



Coefficient

p\_c = < 2.22e-16, p\_sc = 0.25693

# HOXD1\_uc\_dTSS\_nPEAK

+ 14/33 (2/116), - 3/33 (34/116)

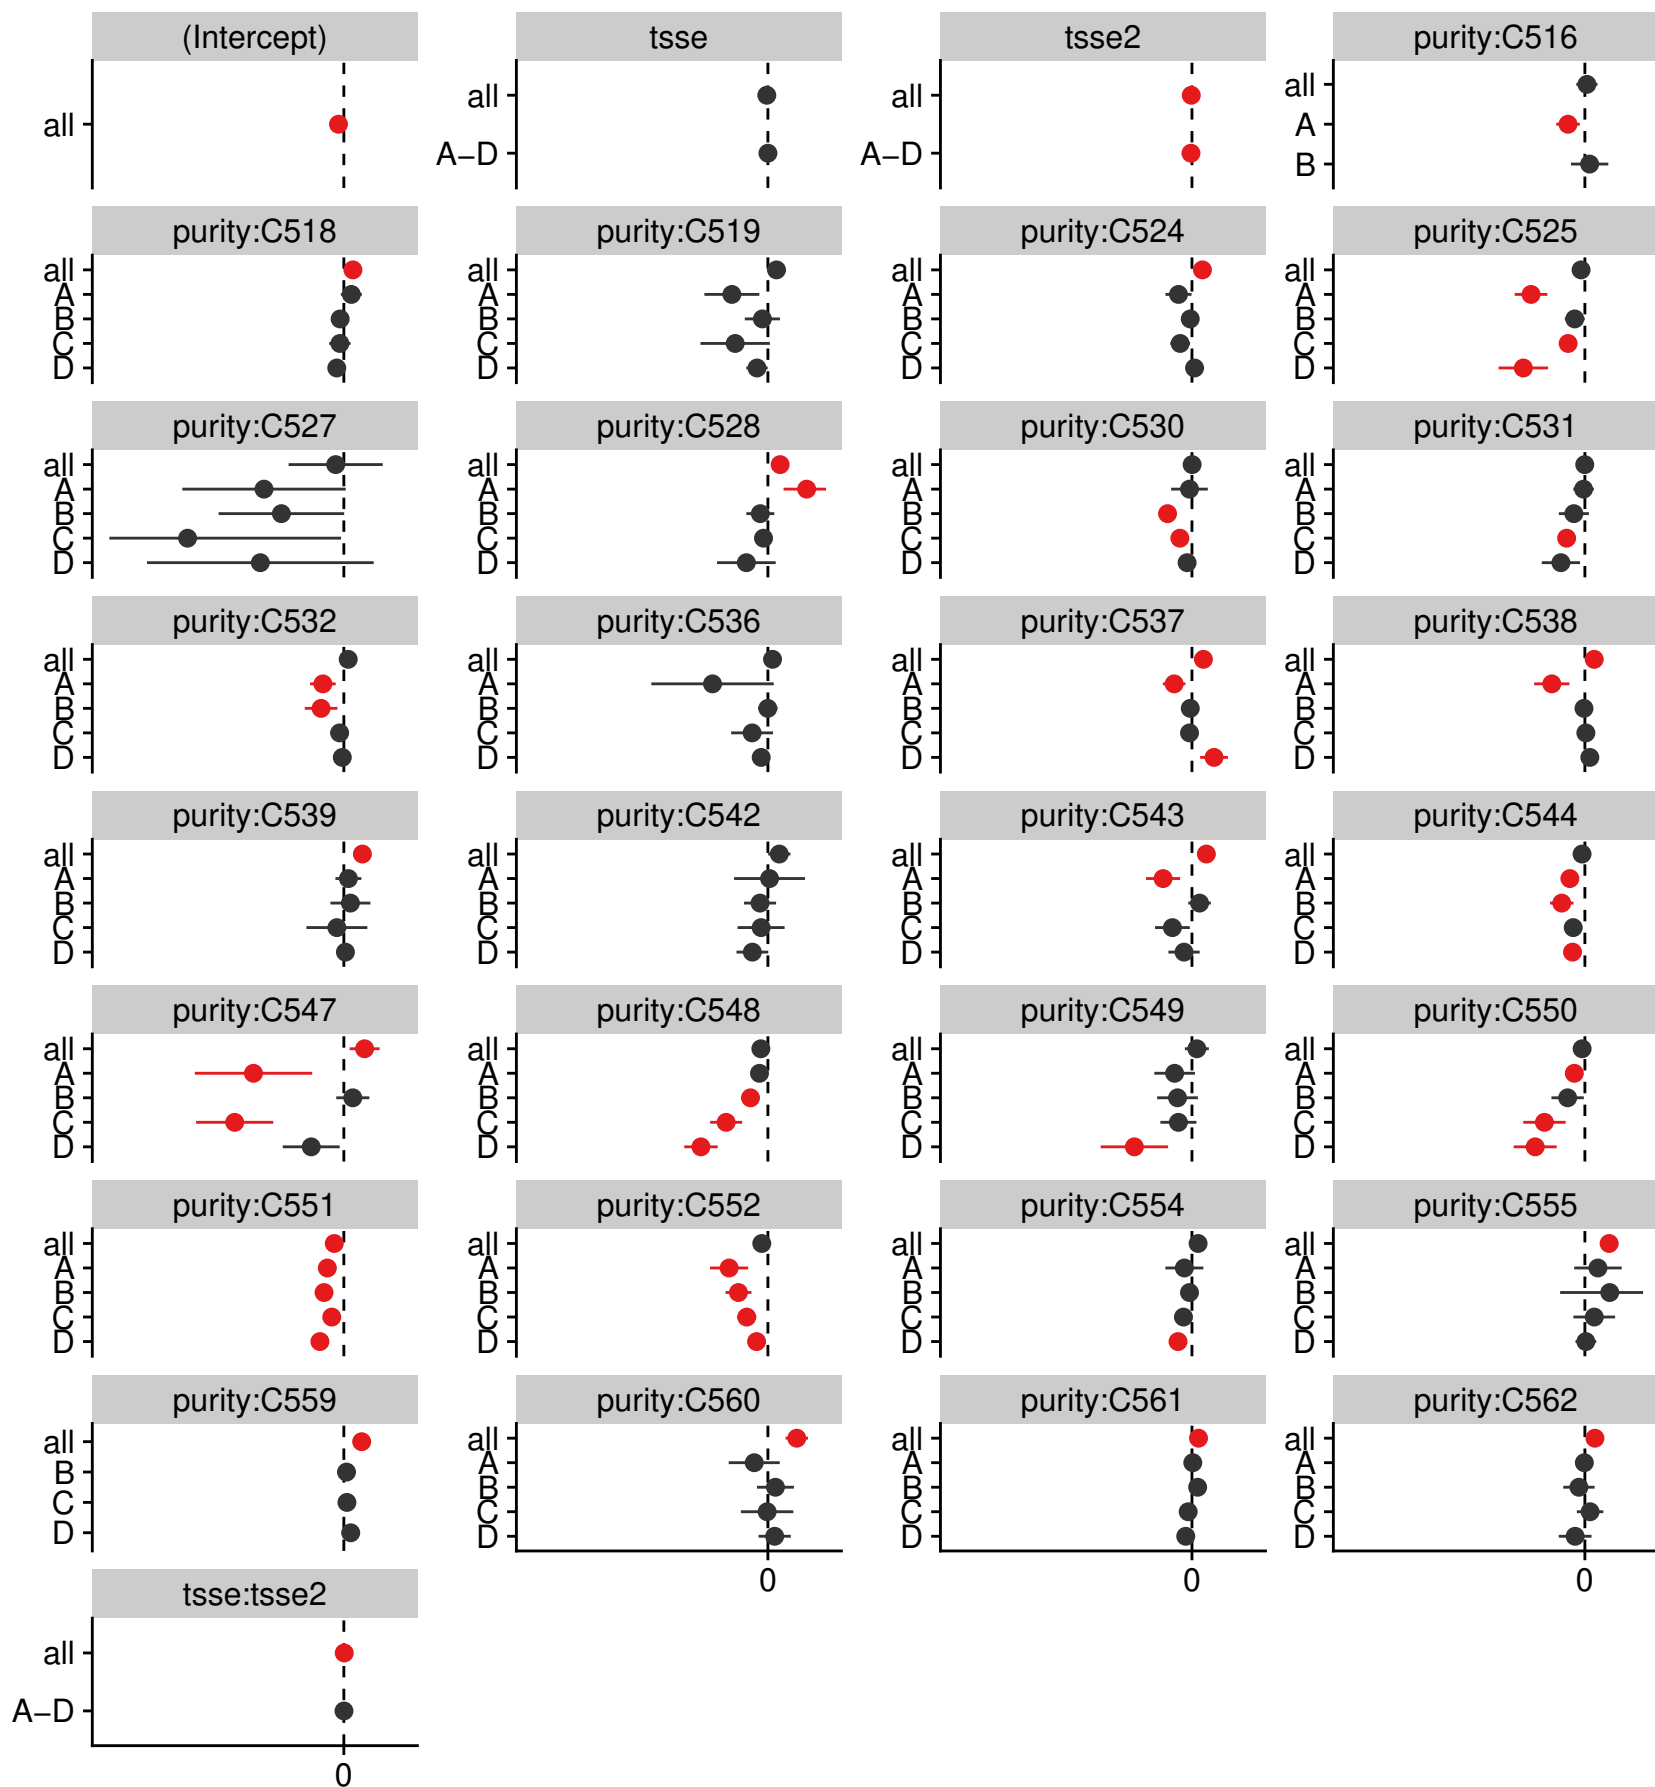

Coefficient

p\_c = < 2.22e-16, p\_sc = 4.9549e-06

# HOXD1\_uc\_dTSS\_oPEAK

+ 10/33 (0/116), - 3/33 (27/116)

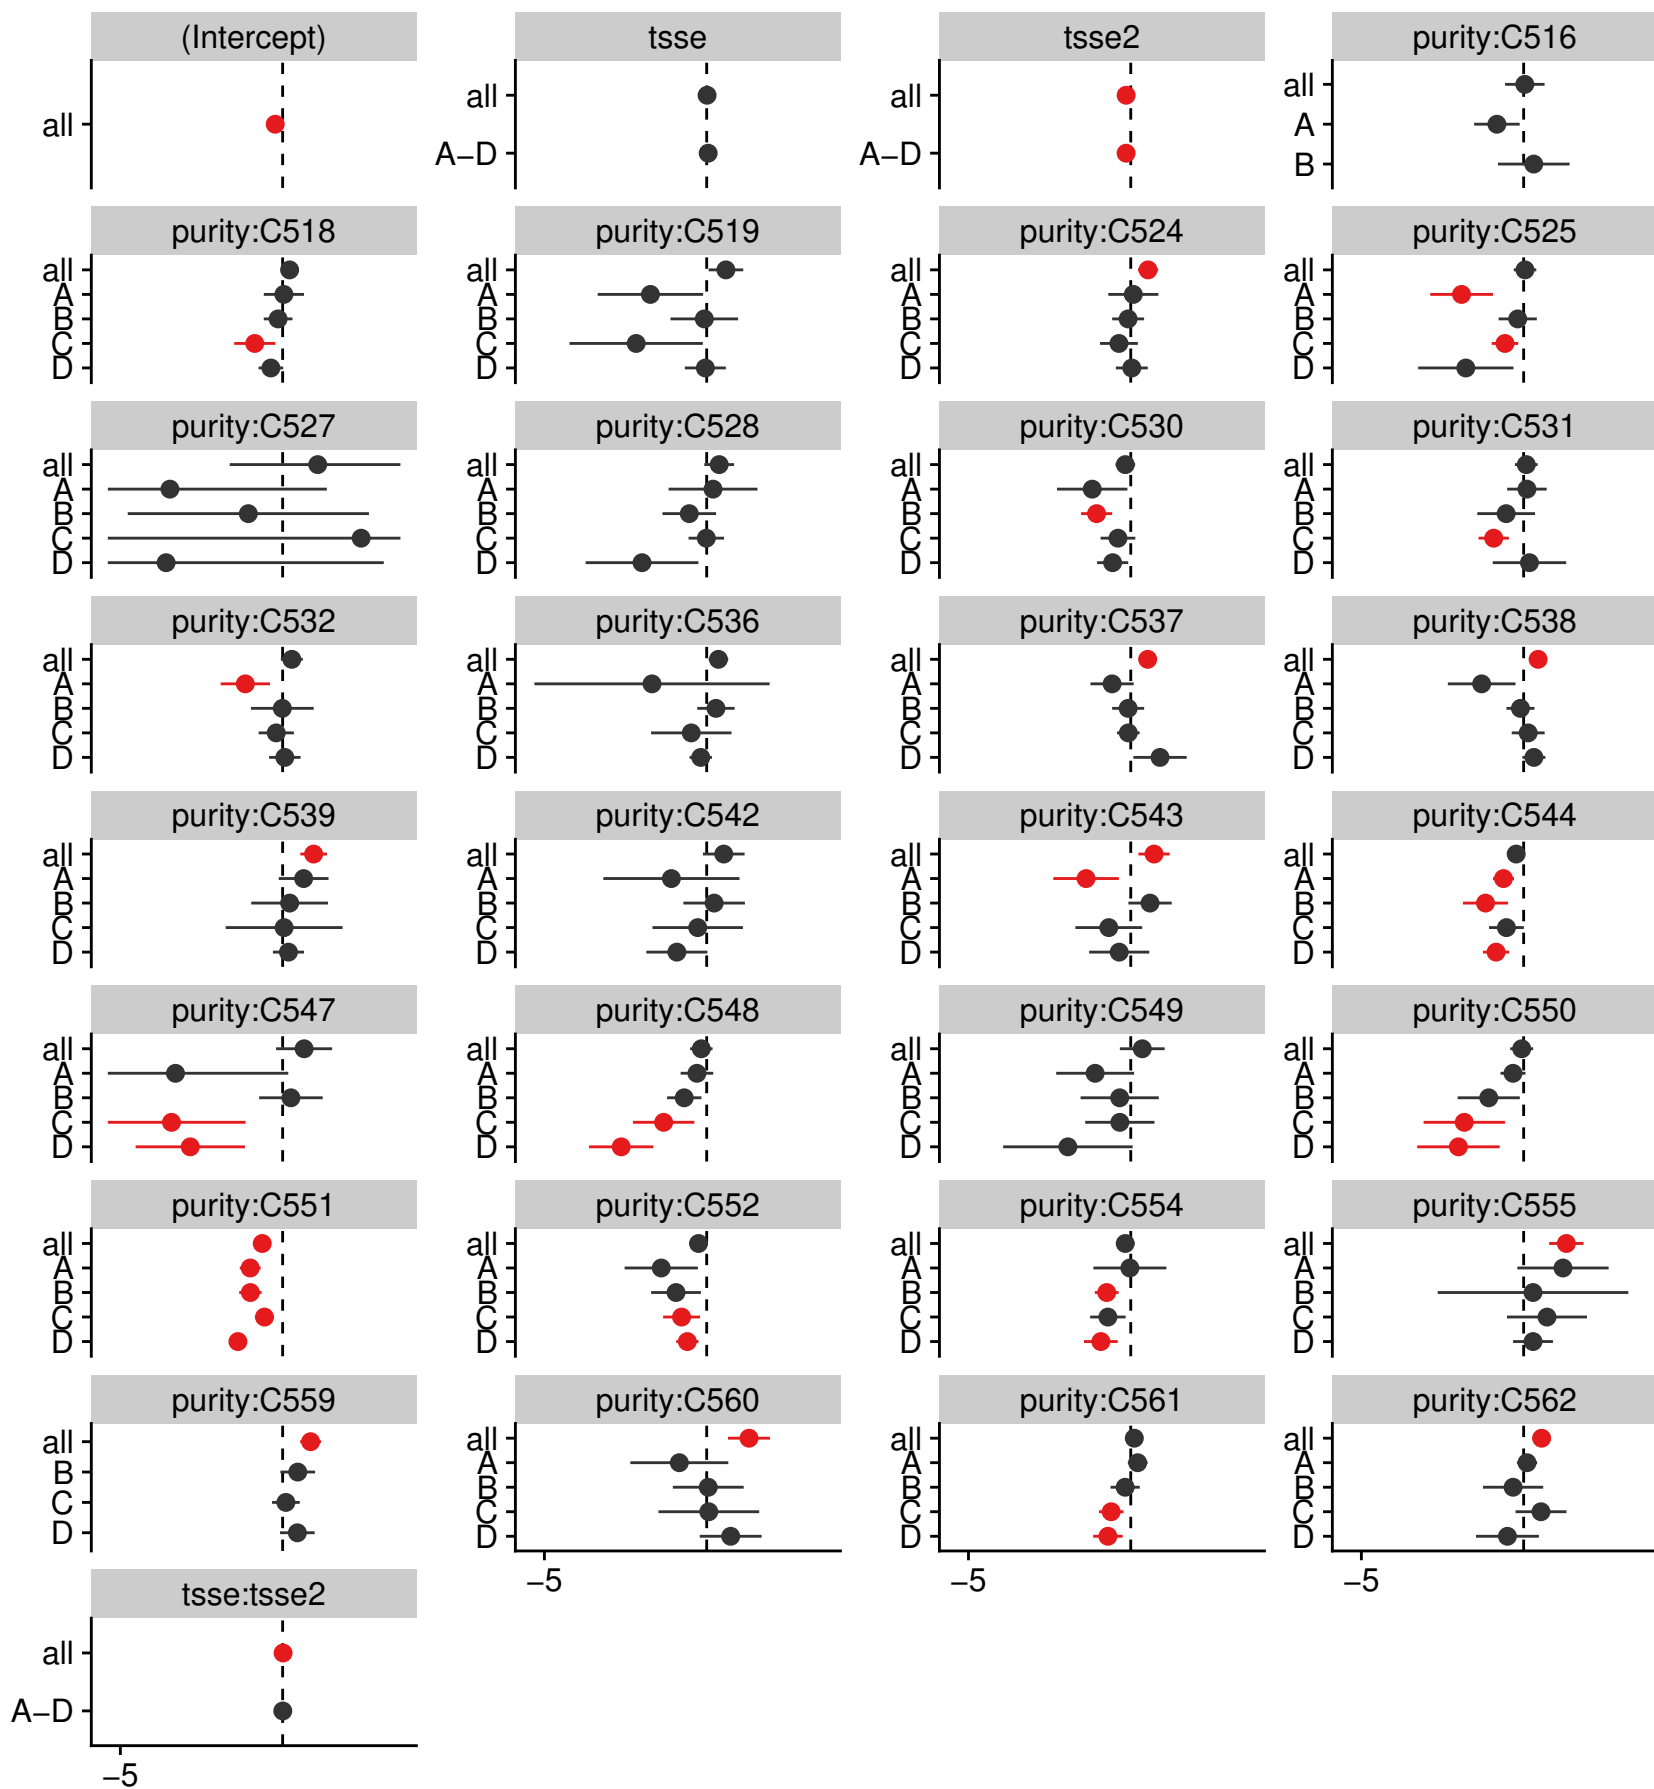

$p_c = < 2.22e-16$ ,  $p_{sc} = 0.027371$

# HOXD3\_uc\_cTSS\_nPEAK

+ 11/33 (1/116), - 2/33 (33/116)



Coefficient

$p_c = < 2.22e-16$ ,  $p_{sc} = 0.0056747$



# HOXD3\_uc\_dTSS\_oPEAK

+ 13/33 (1/116), - 3/33 (41/116)

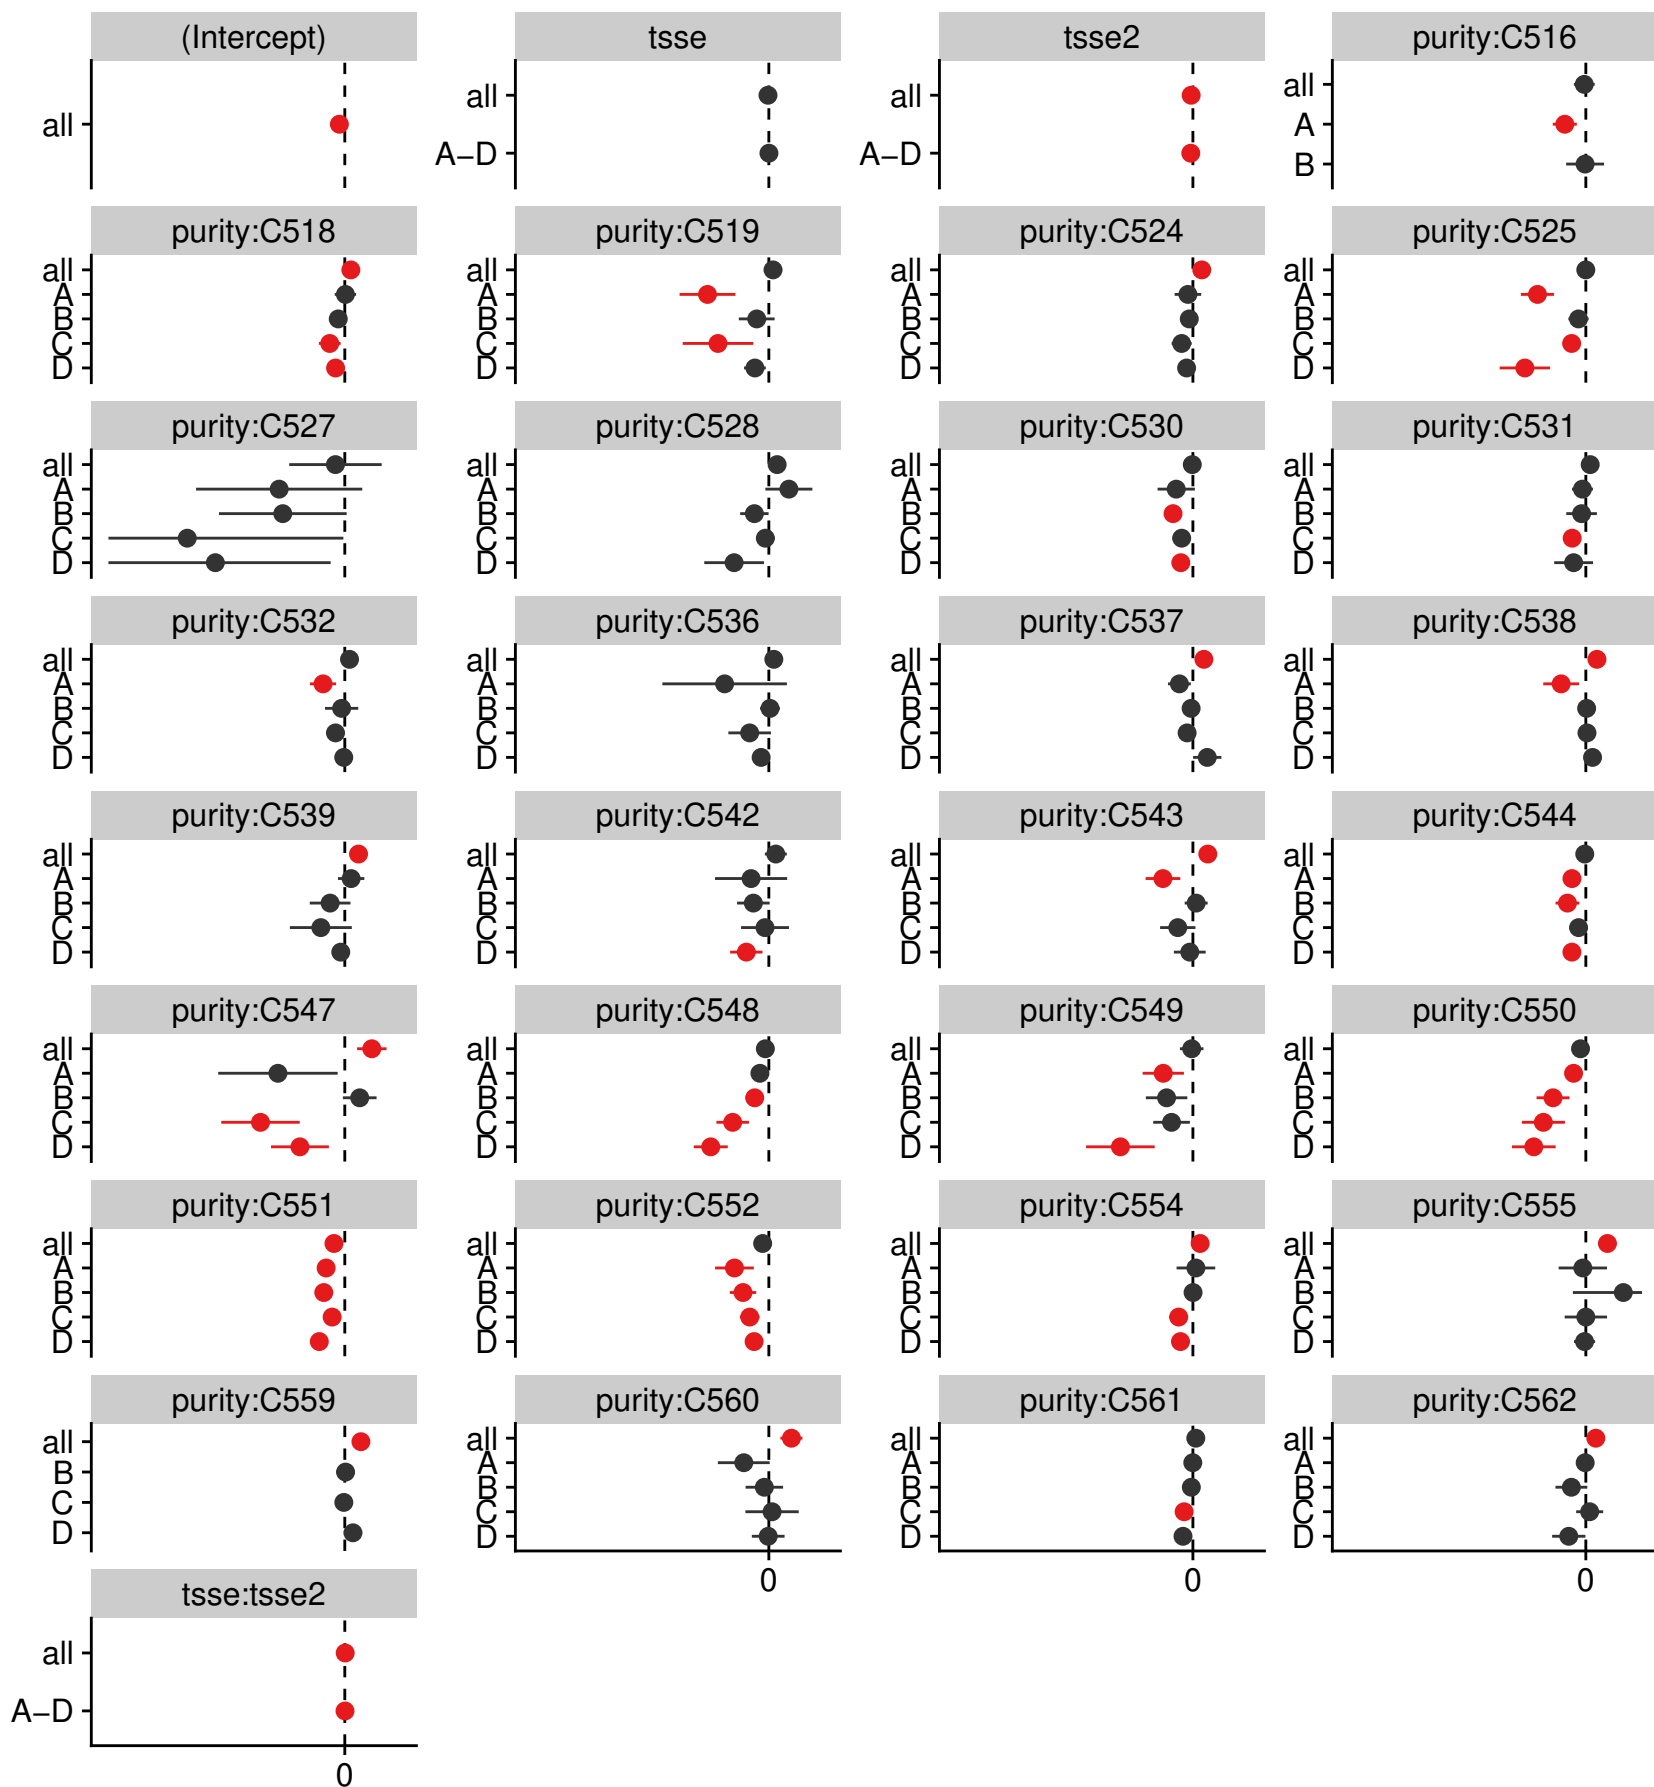

Coefficient

$p_c = < 2.22e-16$ ,  $p_{sc} = 0.1284$

# HOXD3\_uc\_pTSS\_nPEAK

+ 10/33 (1/116), - 5/33 (41/116)

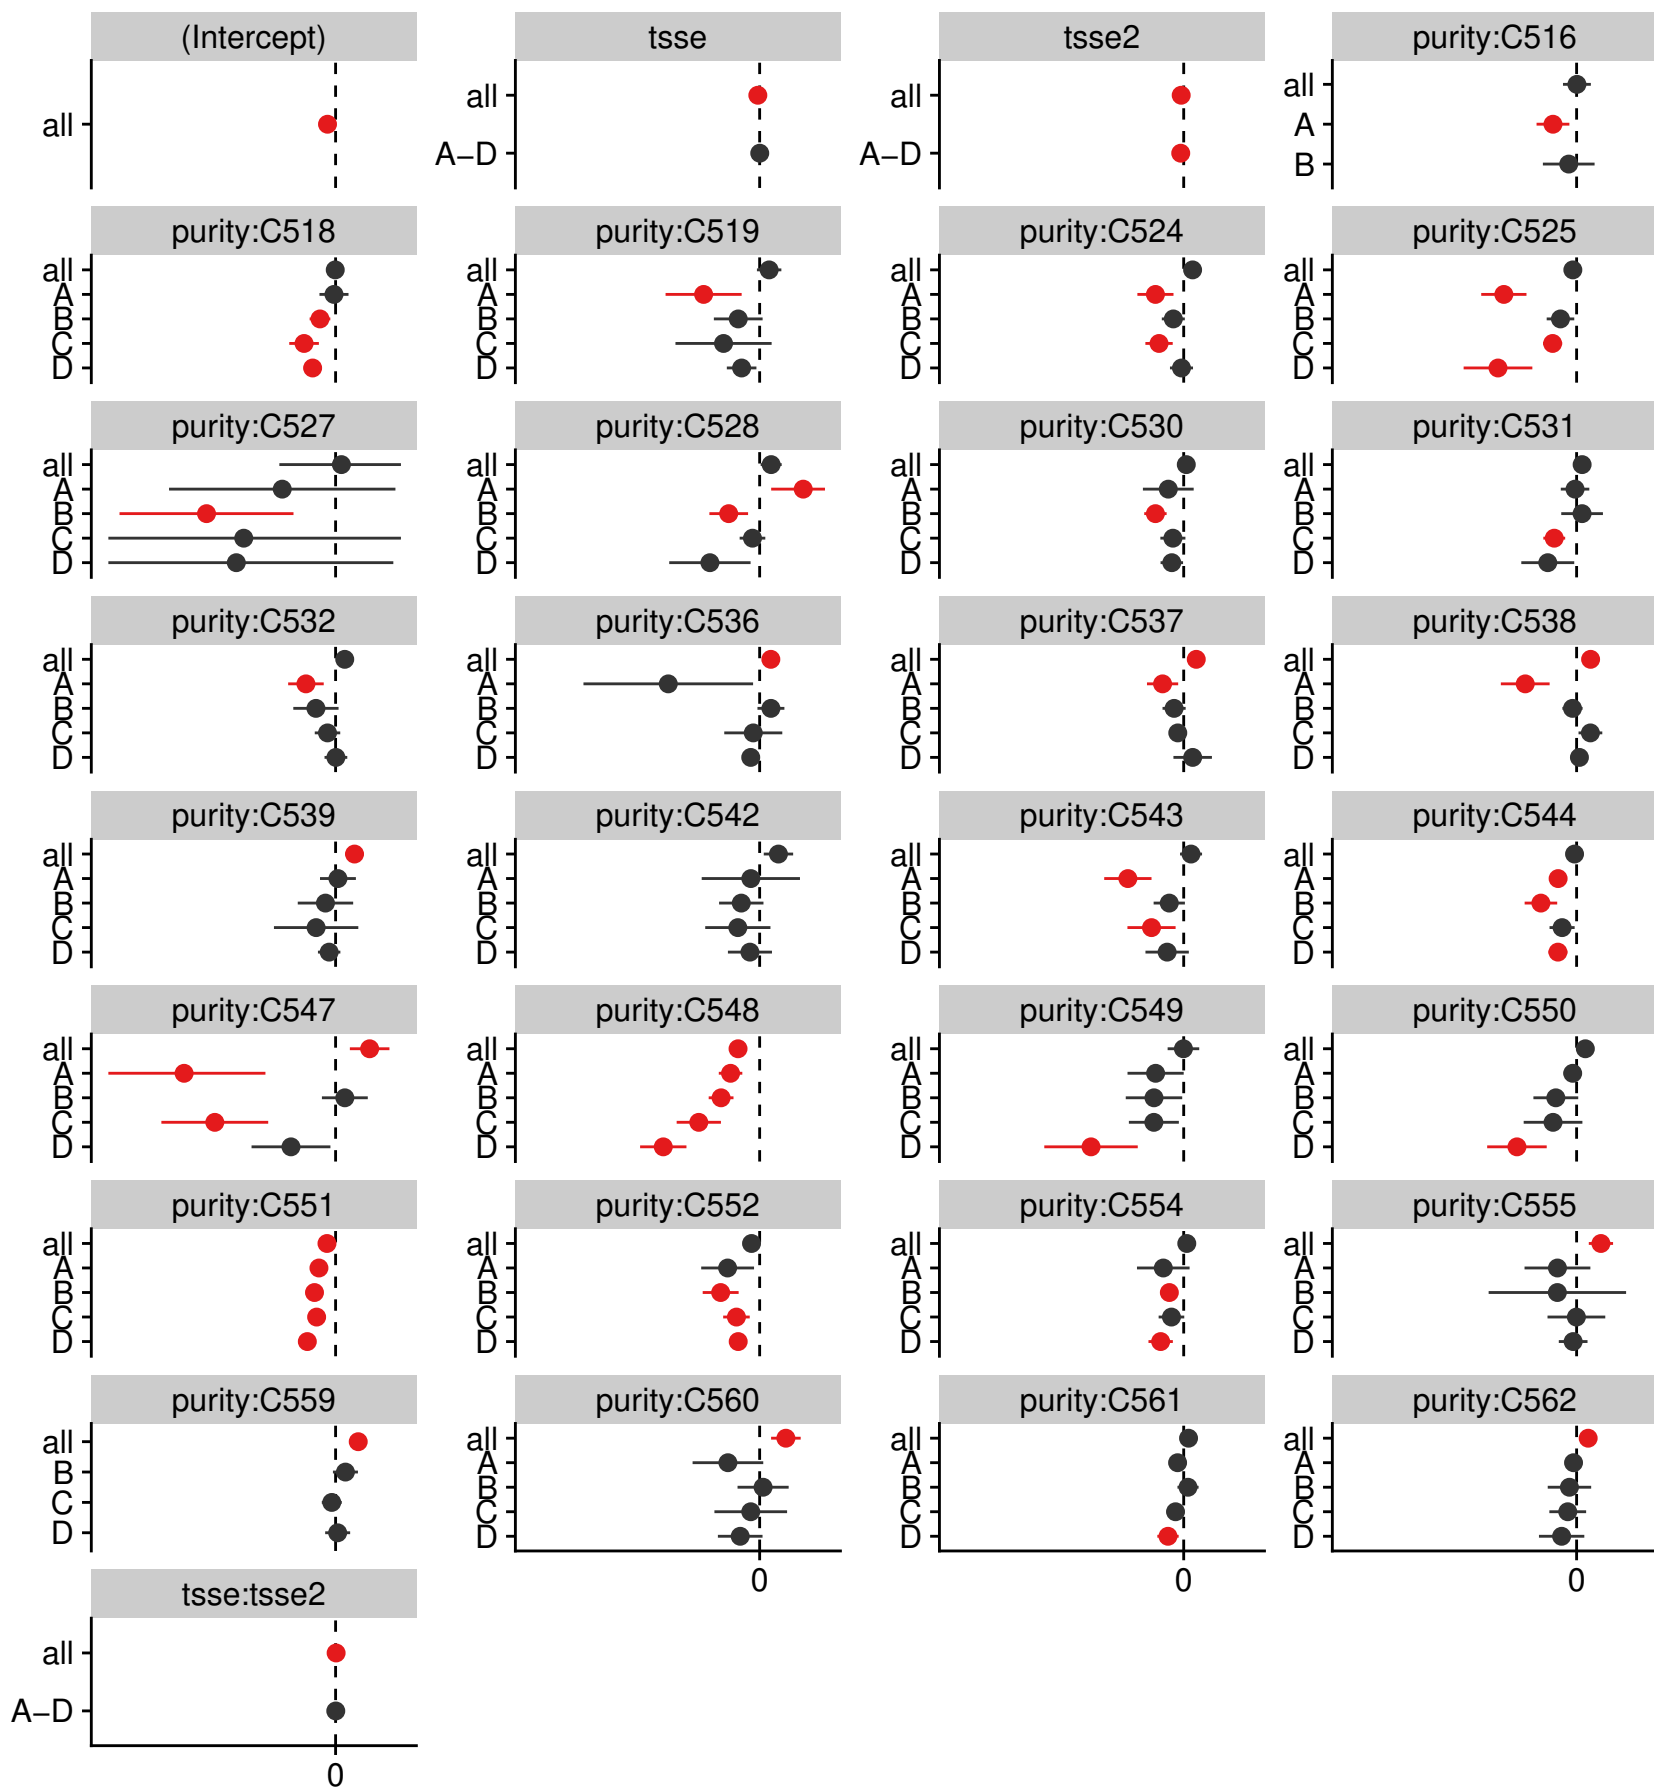

Coefficient

p\_c = < 2.22e-16, p\_sc = 0.7374

# HOXD4\_uc\_dTSS\_nPEAK

+ 11/33 (0/116), - 4/33 (36/116)

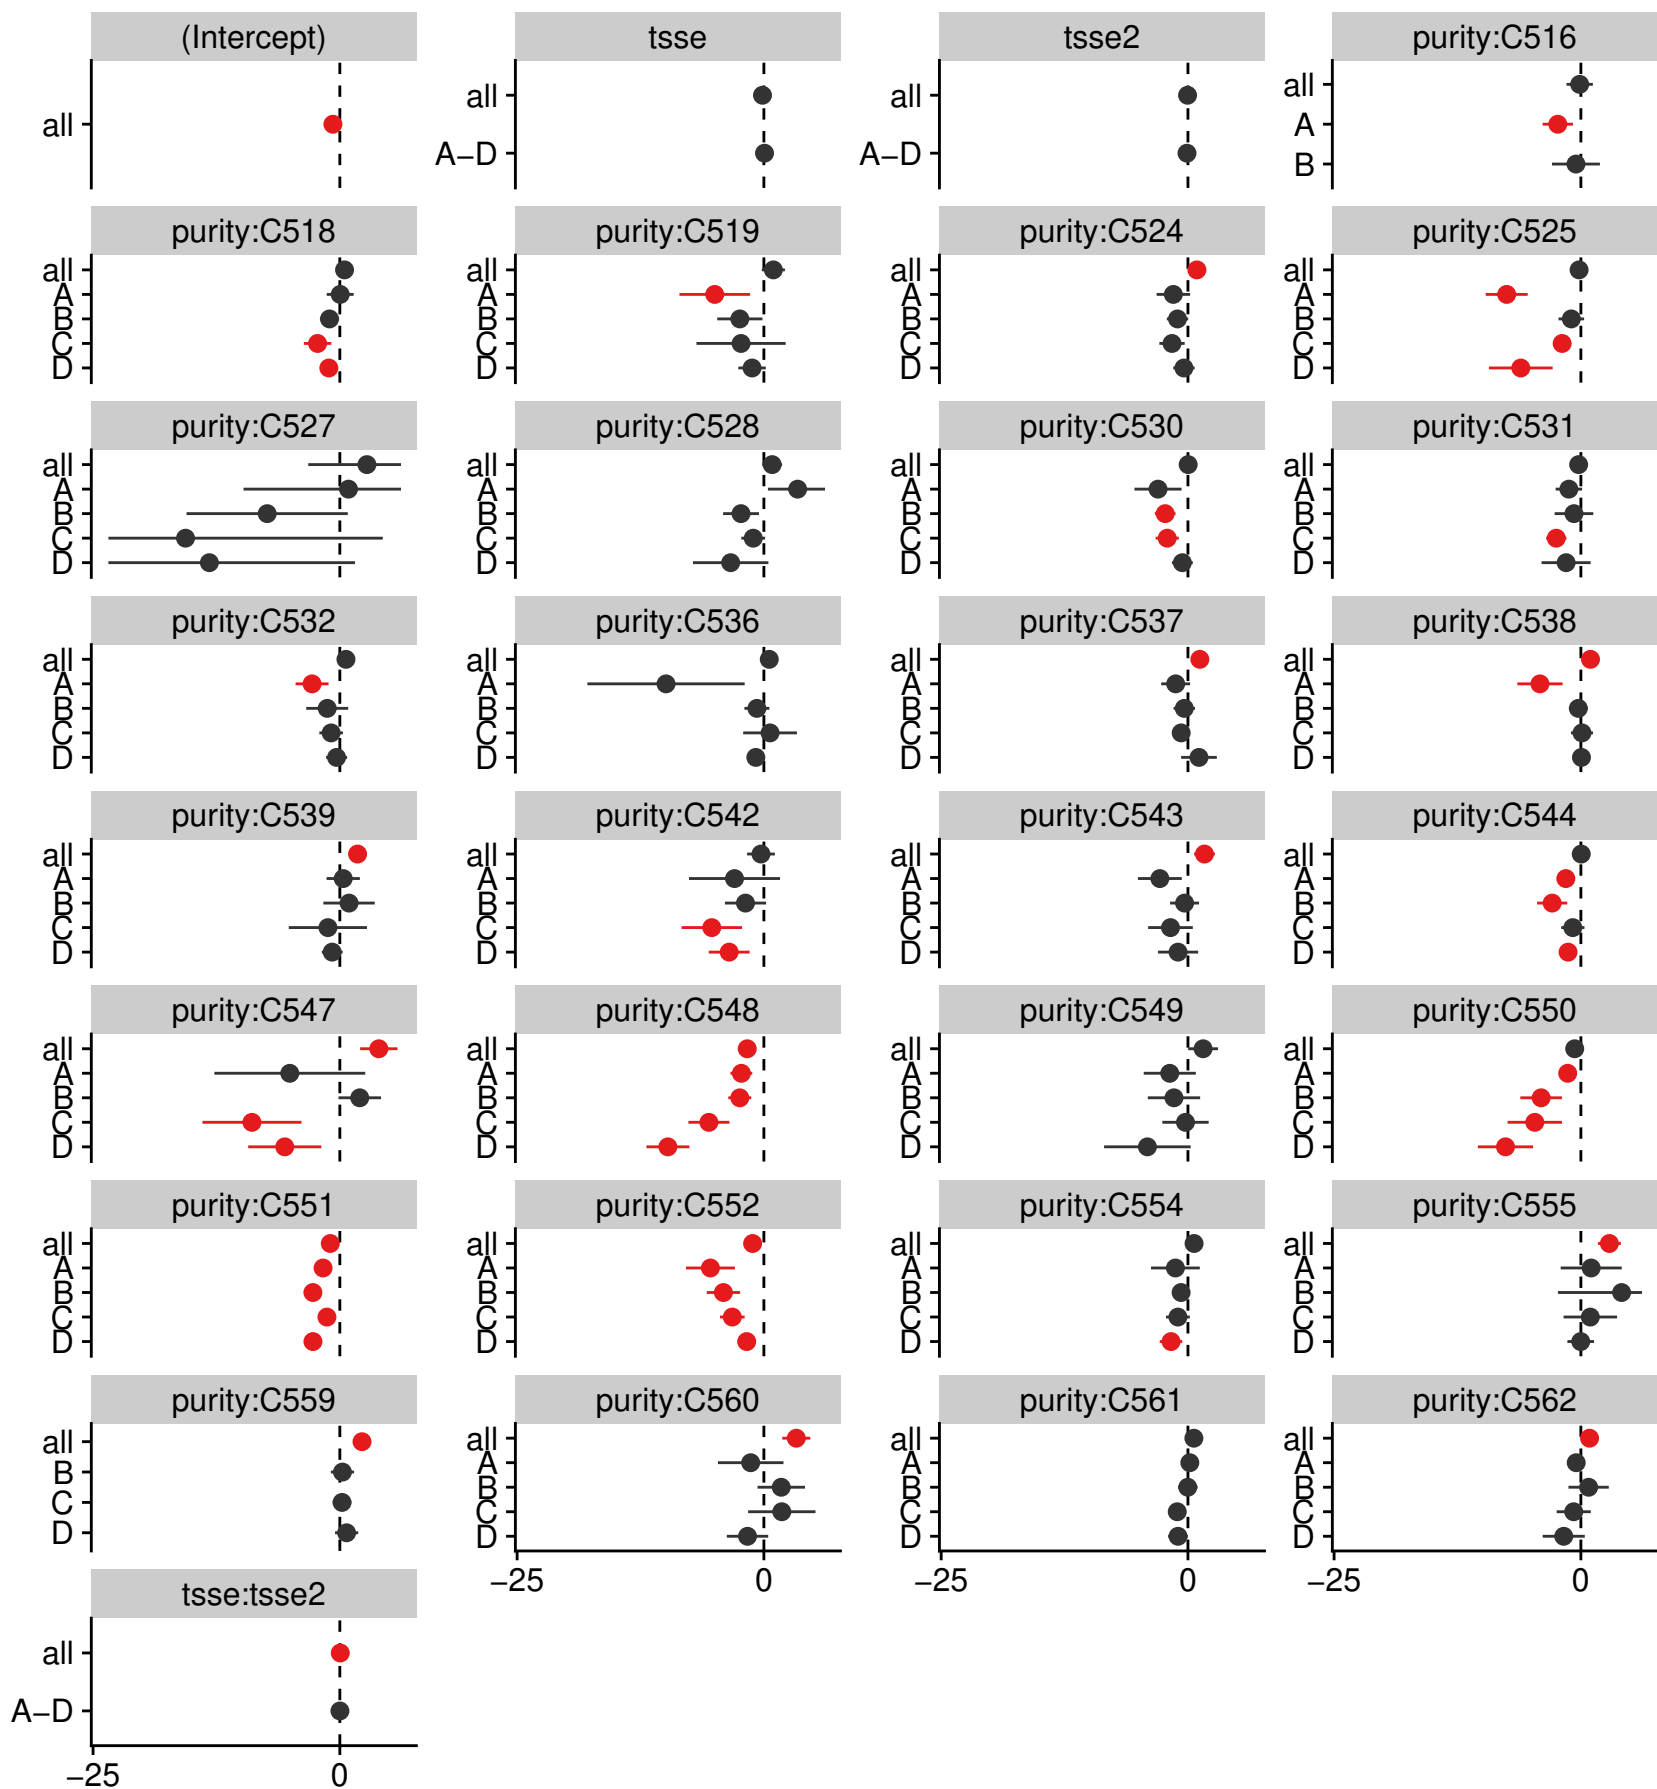

Coefficient

$p_c = < 2.22e-16$ ,  $p_{sc} = 0.050172$

# HOXD9\_uc\_dTSS\_nPEAK

+ 11/33 (0/116), - 2/33 (24/116)

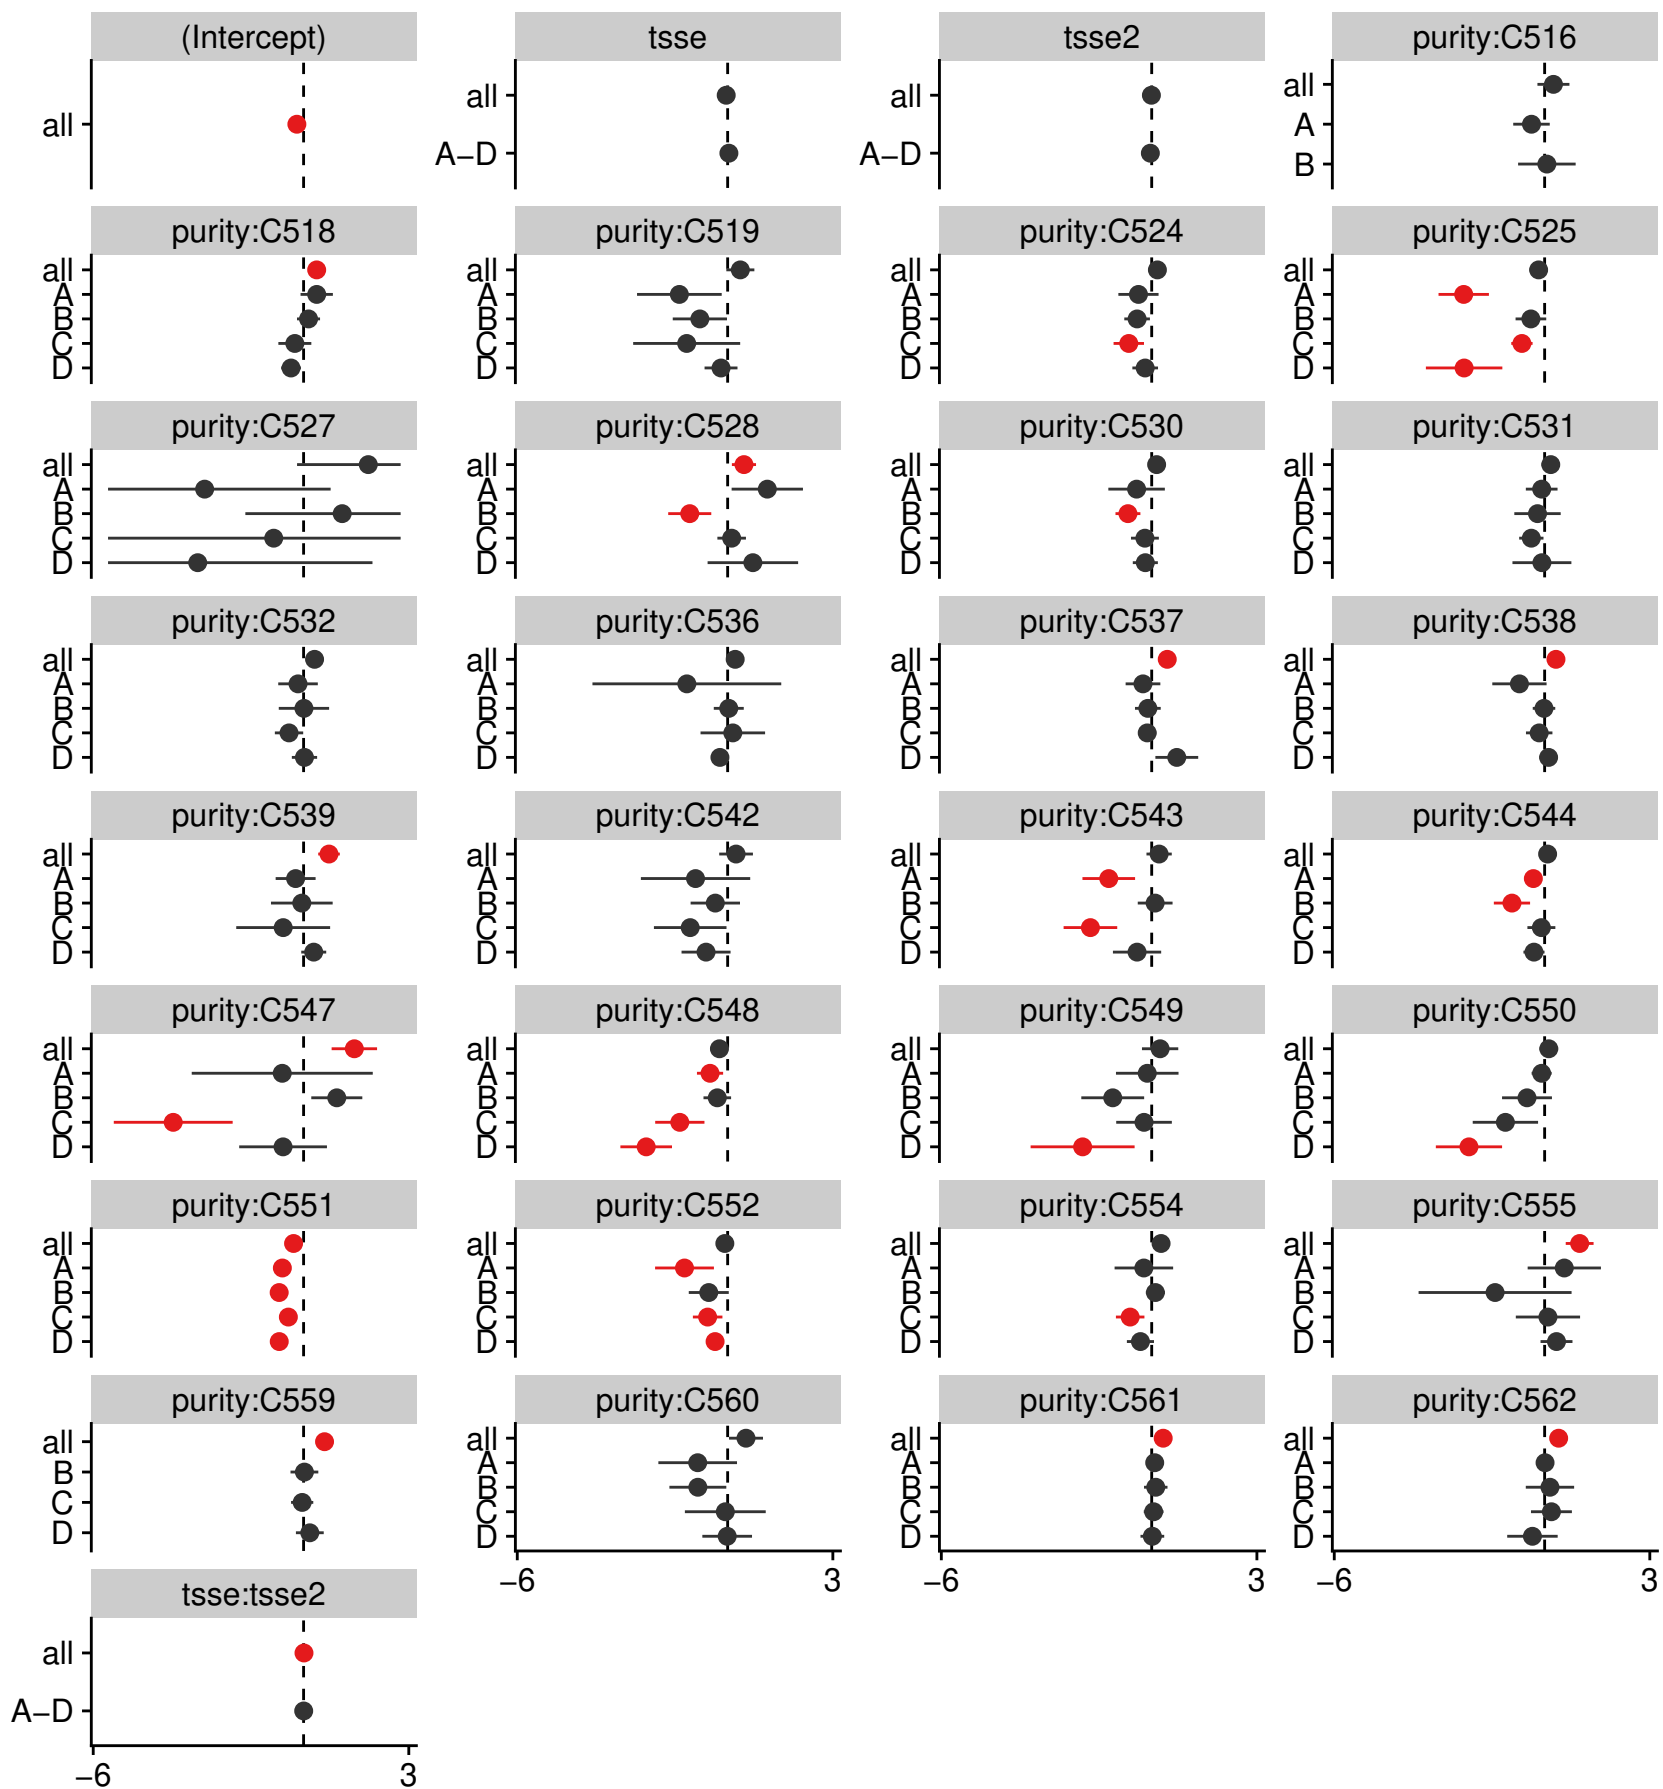

p\_c = < 2.22e-16, p\_sc = 0.0027069

$+ 1/33 (1/116), - 16/33 (45/116)$ 
$$p_c = < 2.22e-16, p_{sc} = 1.7498e-12$$

# IRF1\_uc\_dTSS\_oPEAK

+ 2/33 (2/116), - 14/33 (64/116)

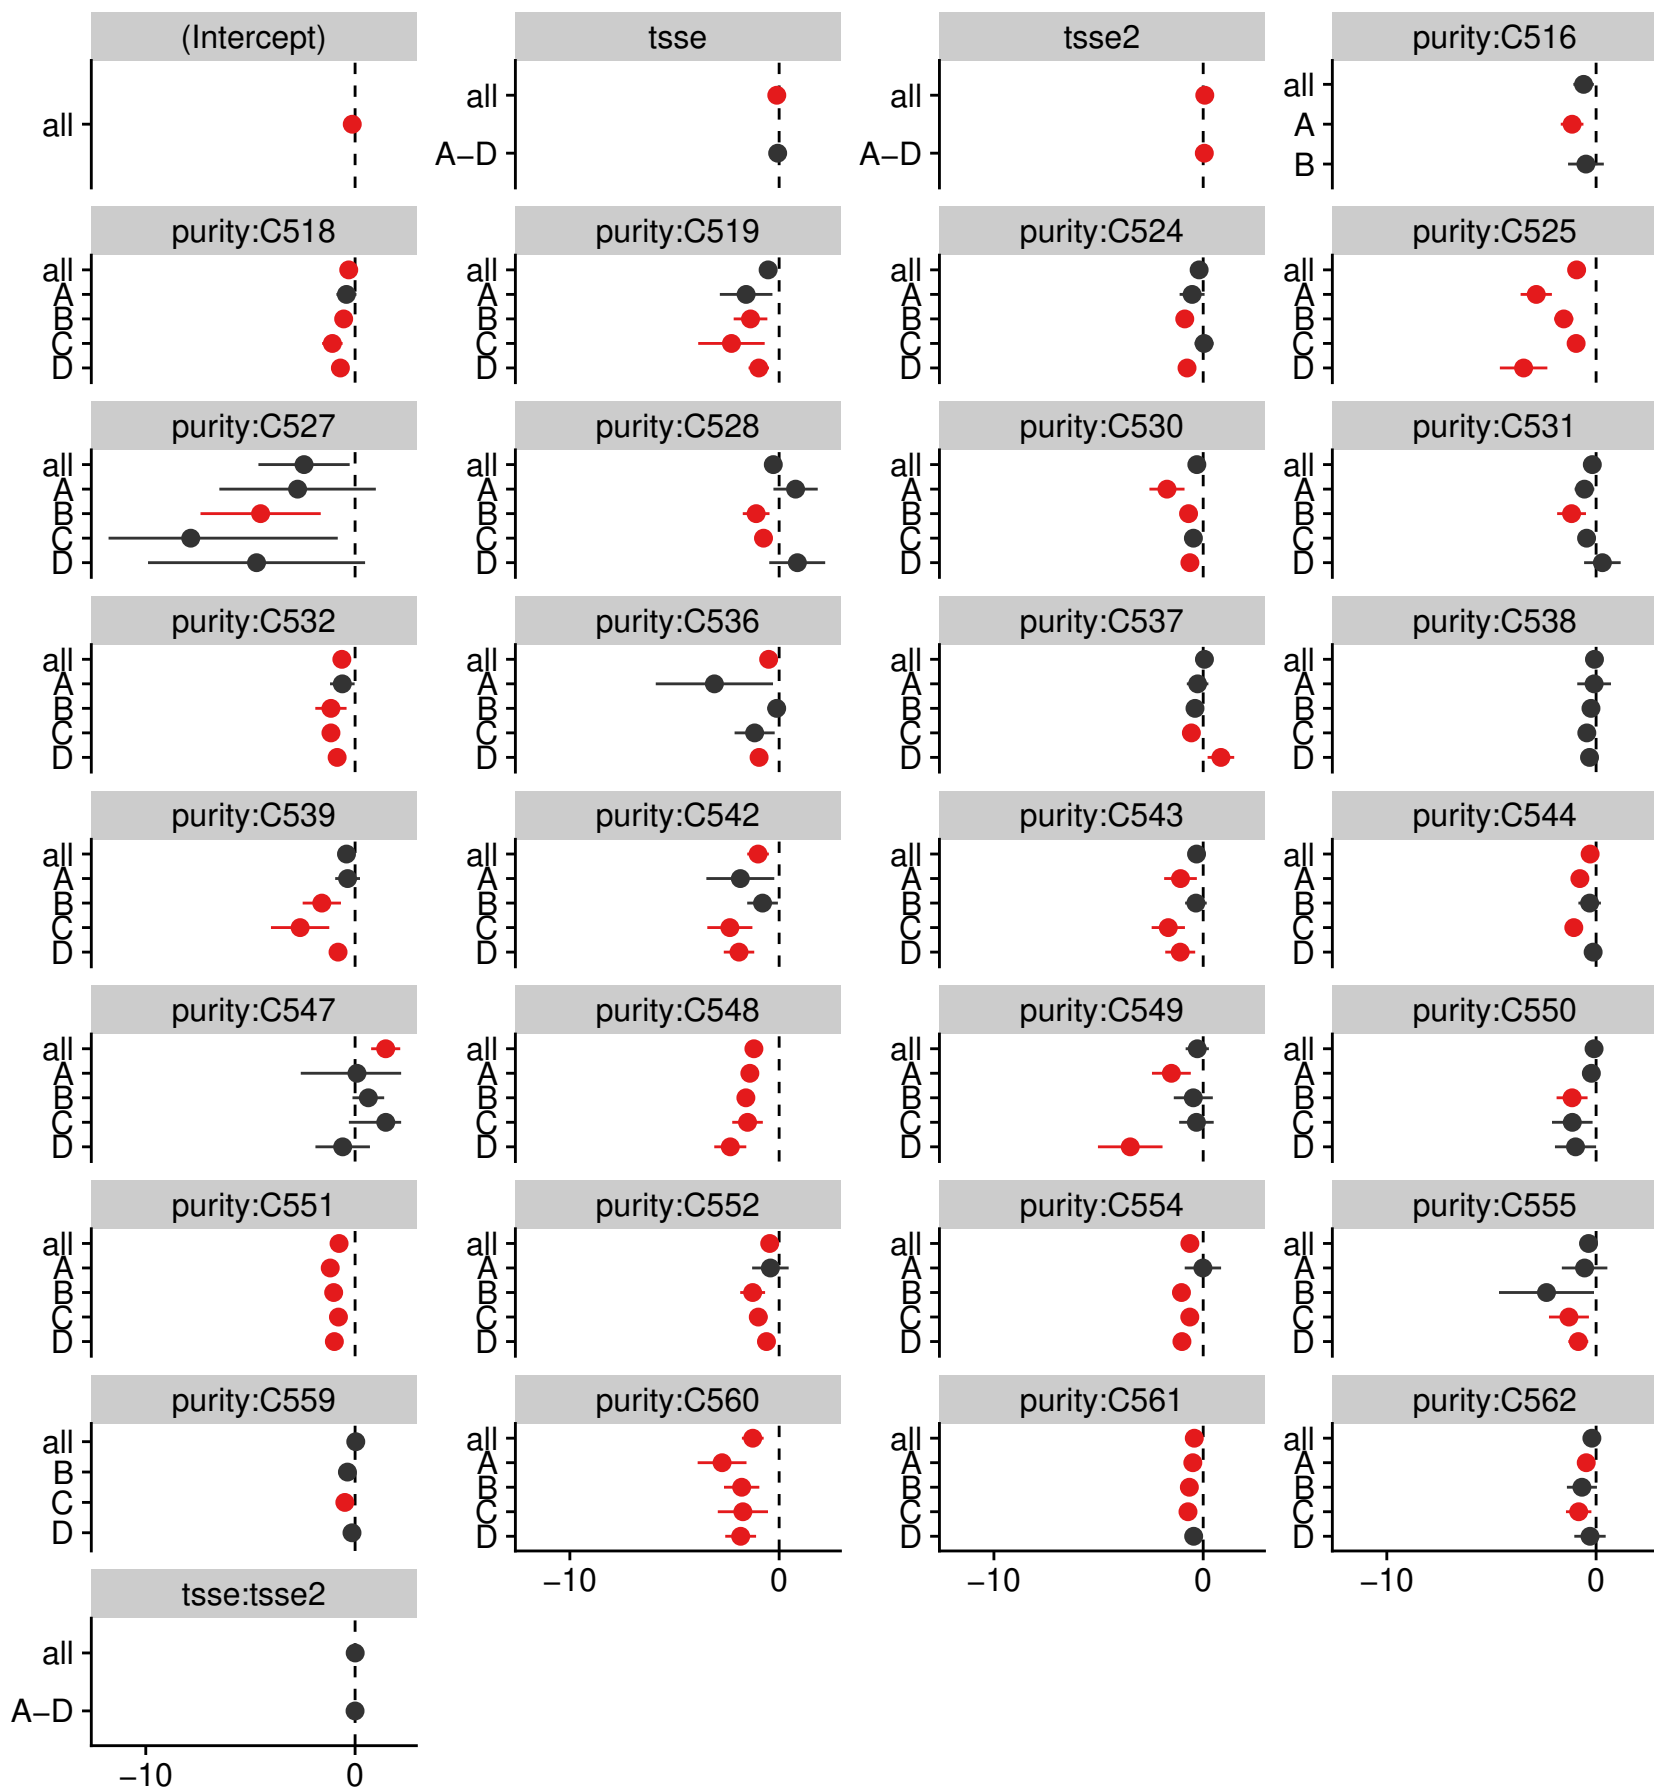

p\_c = < 2.22e-16, p\_sc = 3.0169e-08

# IRF1\_uc\_pTSS\_oPEAK

+ 0/33 (1/116), - 19/33 (72/116)

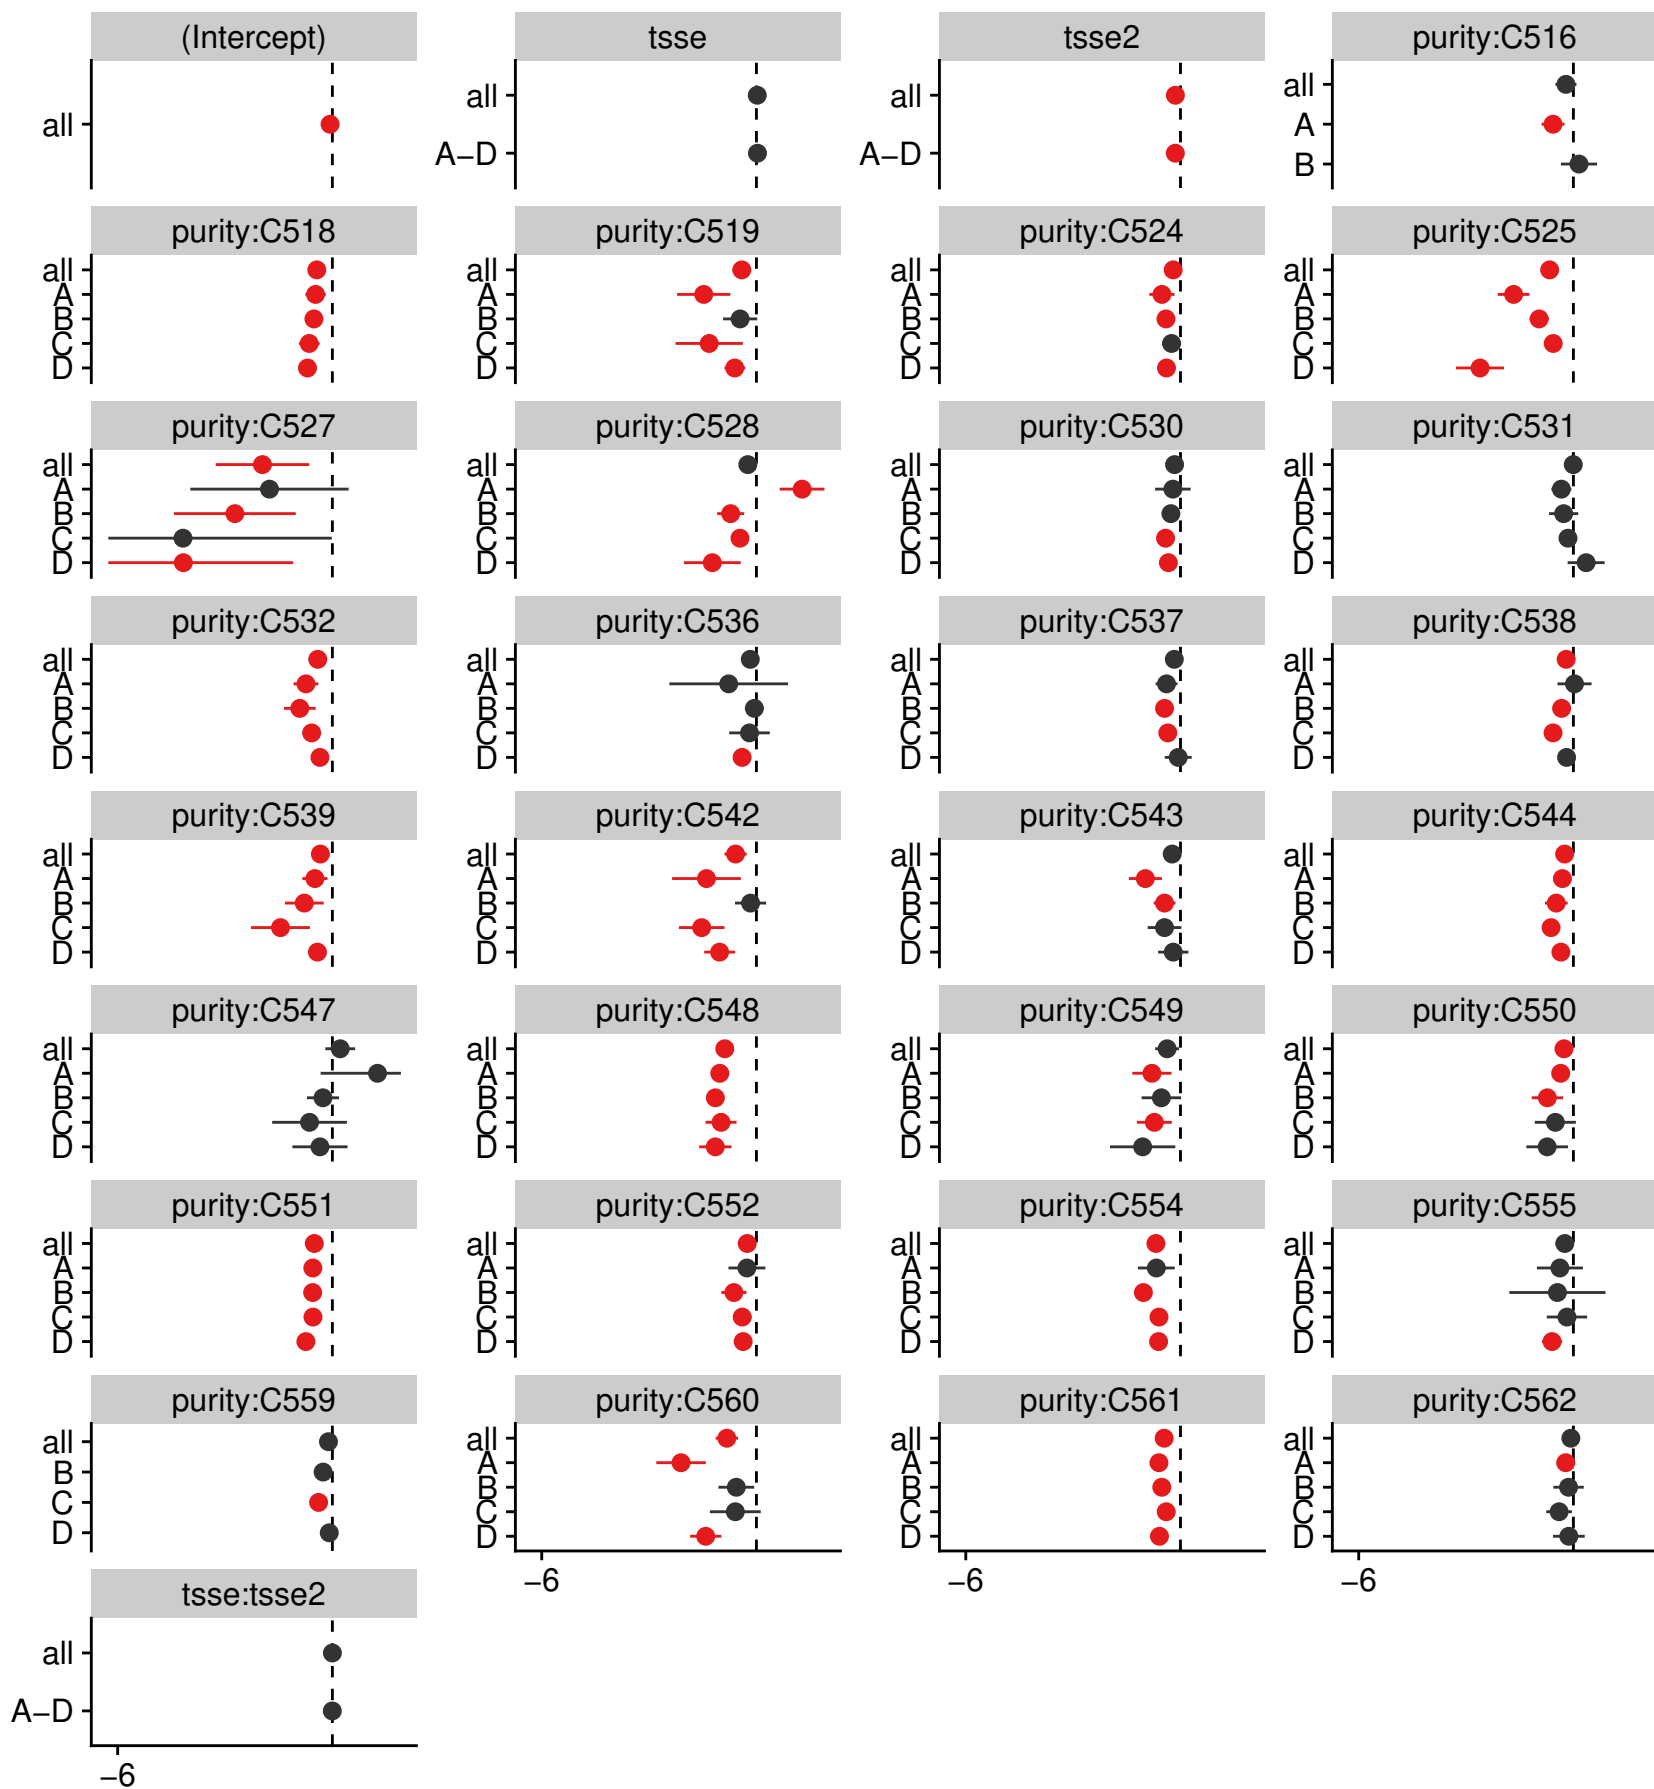

p\_c = < 2.22e-16, p\_sc = 1.1899e-10

# IRF2\_uc\_dTSS\_oPEAK

+ 2/33 (11/116), - 14/33 (25/116)

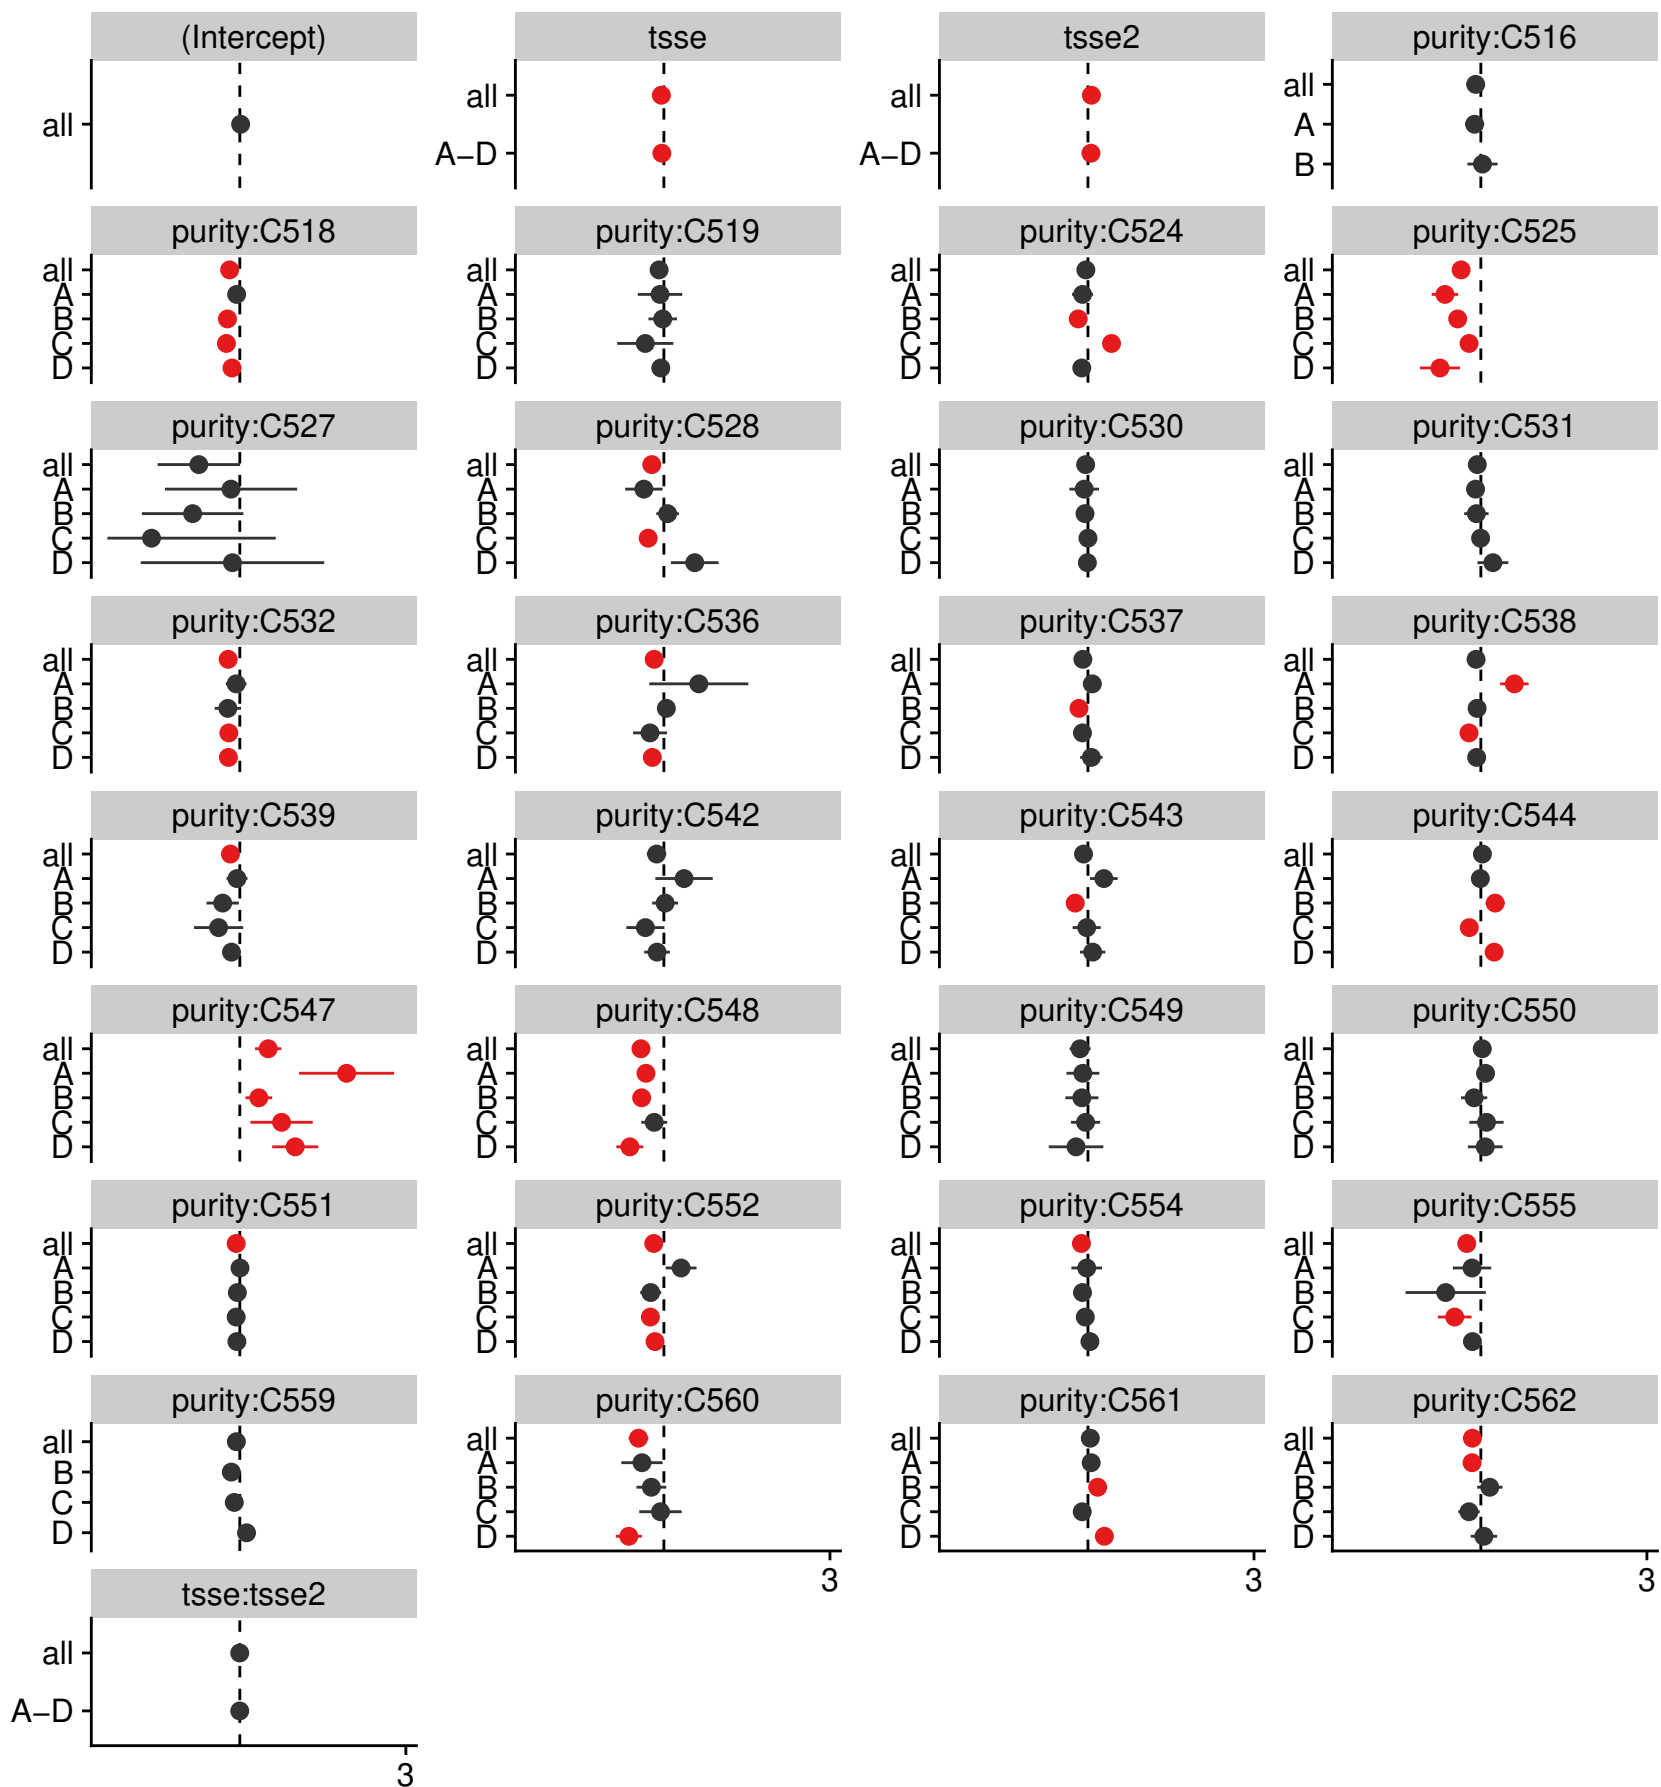

Coefficient

p\_c = < 2.22e-16, p\_sc = < 2.22e-16



# IRF2\_uc\_pTSS\_oPEAK

+ 2/33 (5/116), - 15/33 (21/116)

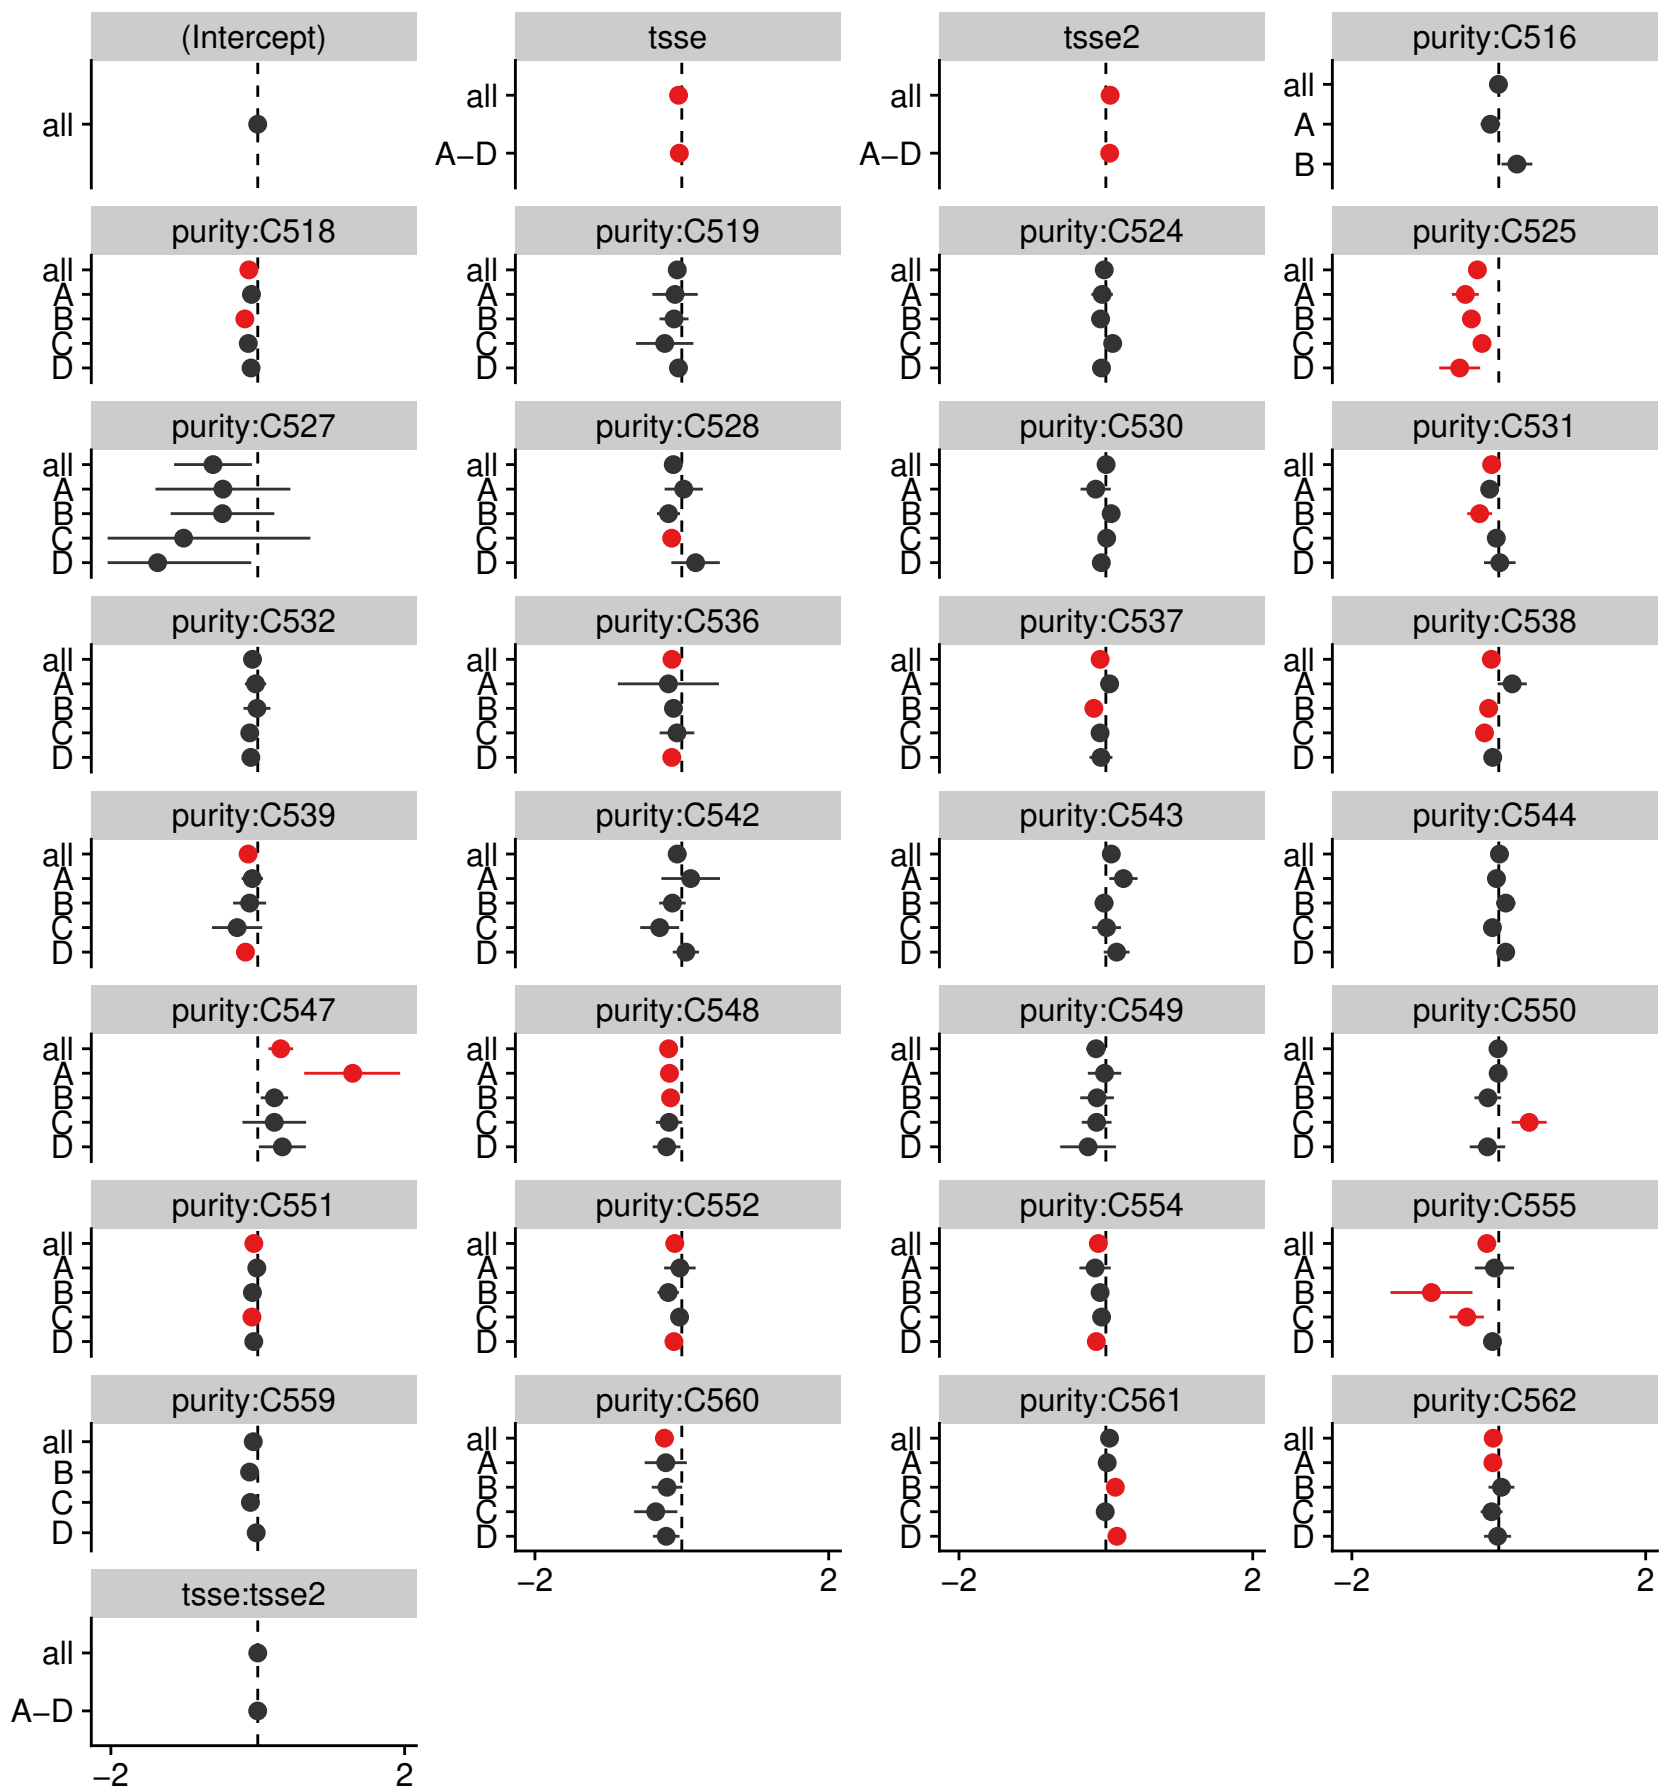

p\_c = < 2.22e-16, p\_sc = 2.7996e-06

$+ 3/33 \text{ (8/116)}, - 17/33 \text{ (20/116)}$ 
$$p_c = < 2.22e-16, p_{sc} = 8.6561e-10$$

# IRF3\_uc\_dTSS\_oPEAK

+ 3/33 (15/116), - 16/33 (18/116)

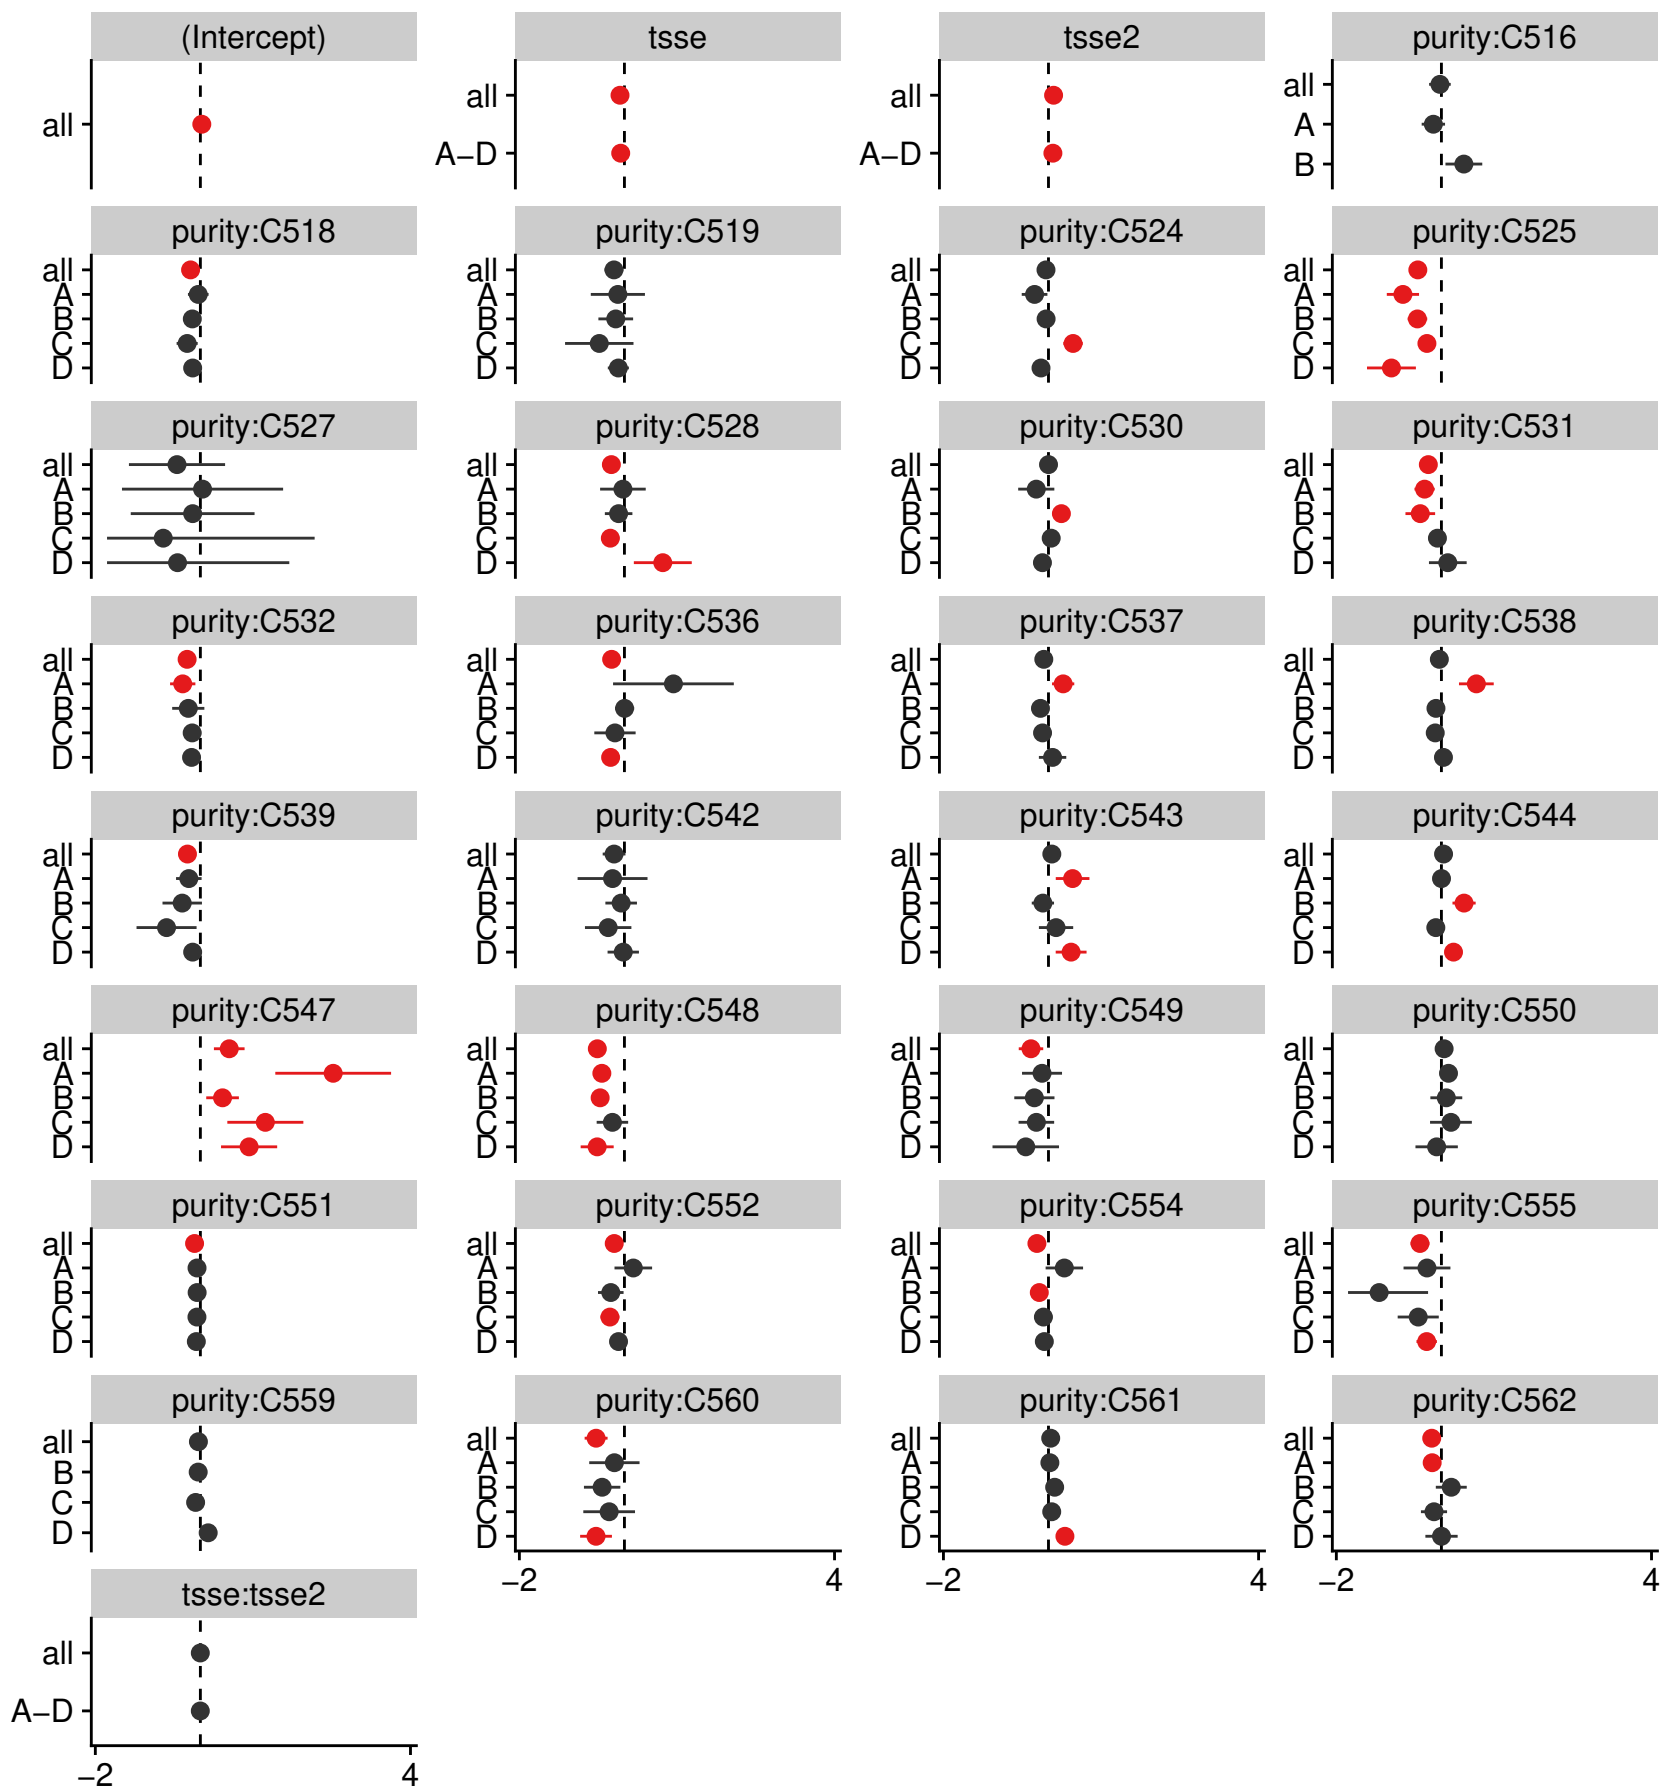

p\_c = < 2.22e-16, p\_sc = 7.3974e-13

# IRF3\_uc\_pTSS\_oPEAK

+ 2/33 (9/116), - 16/33 (28/116)

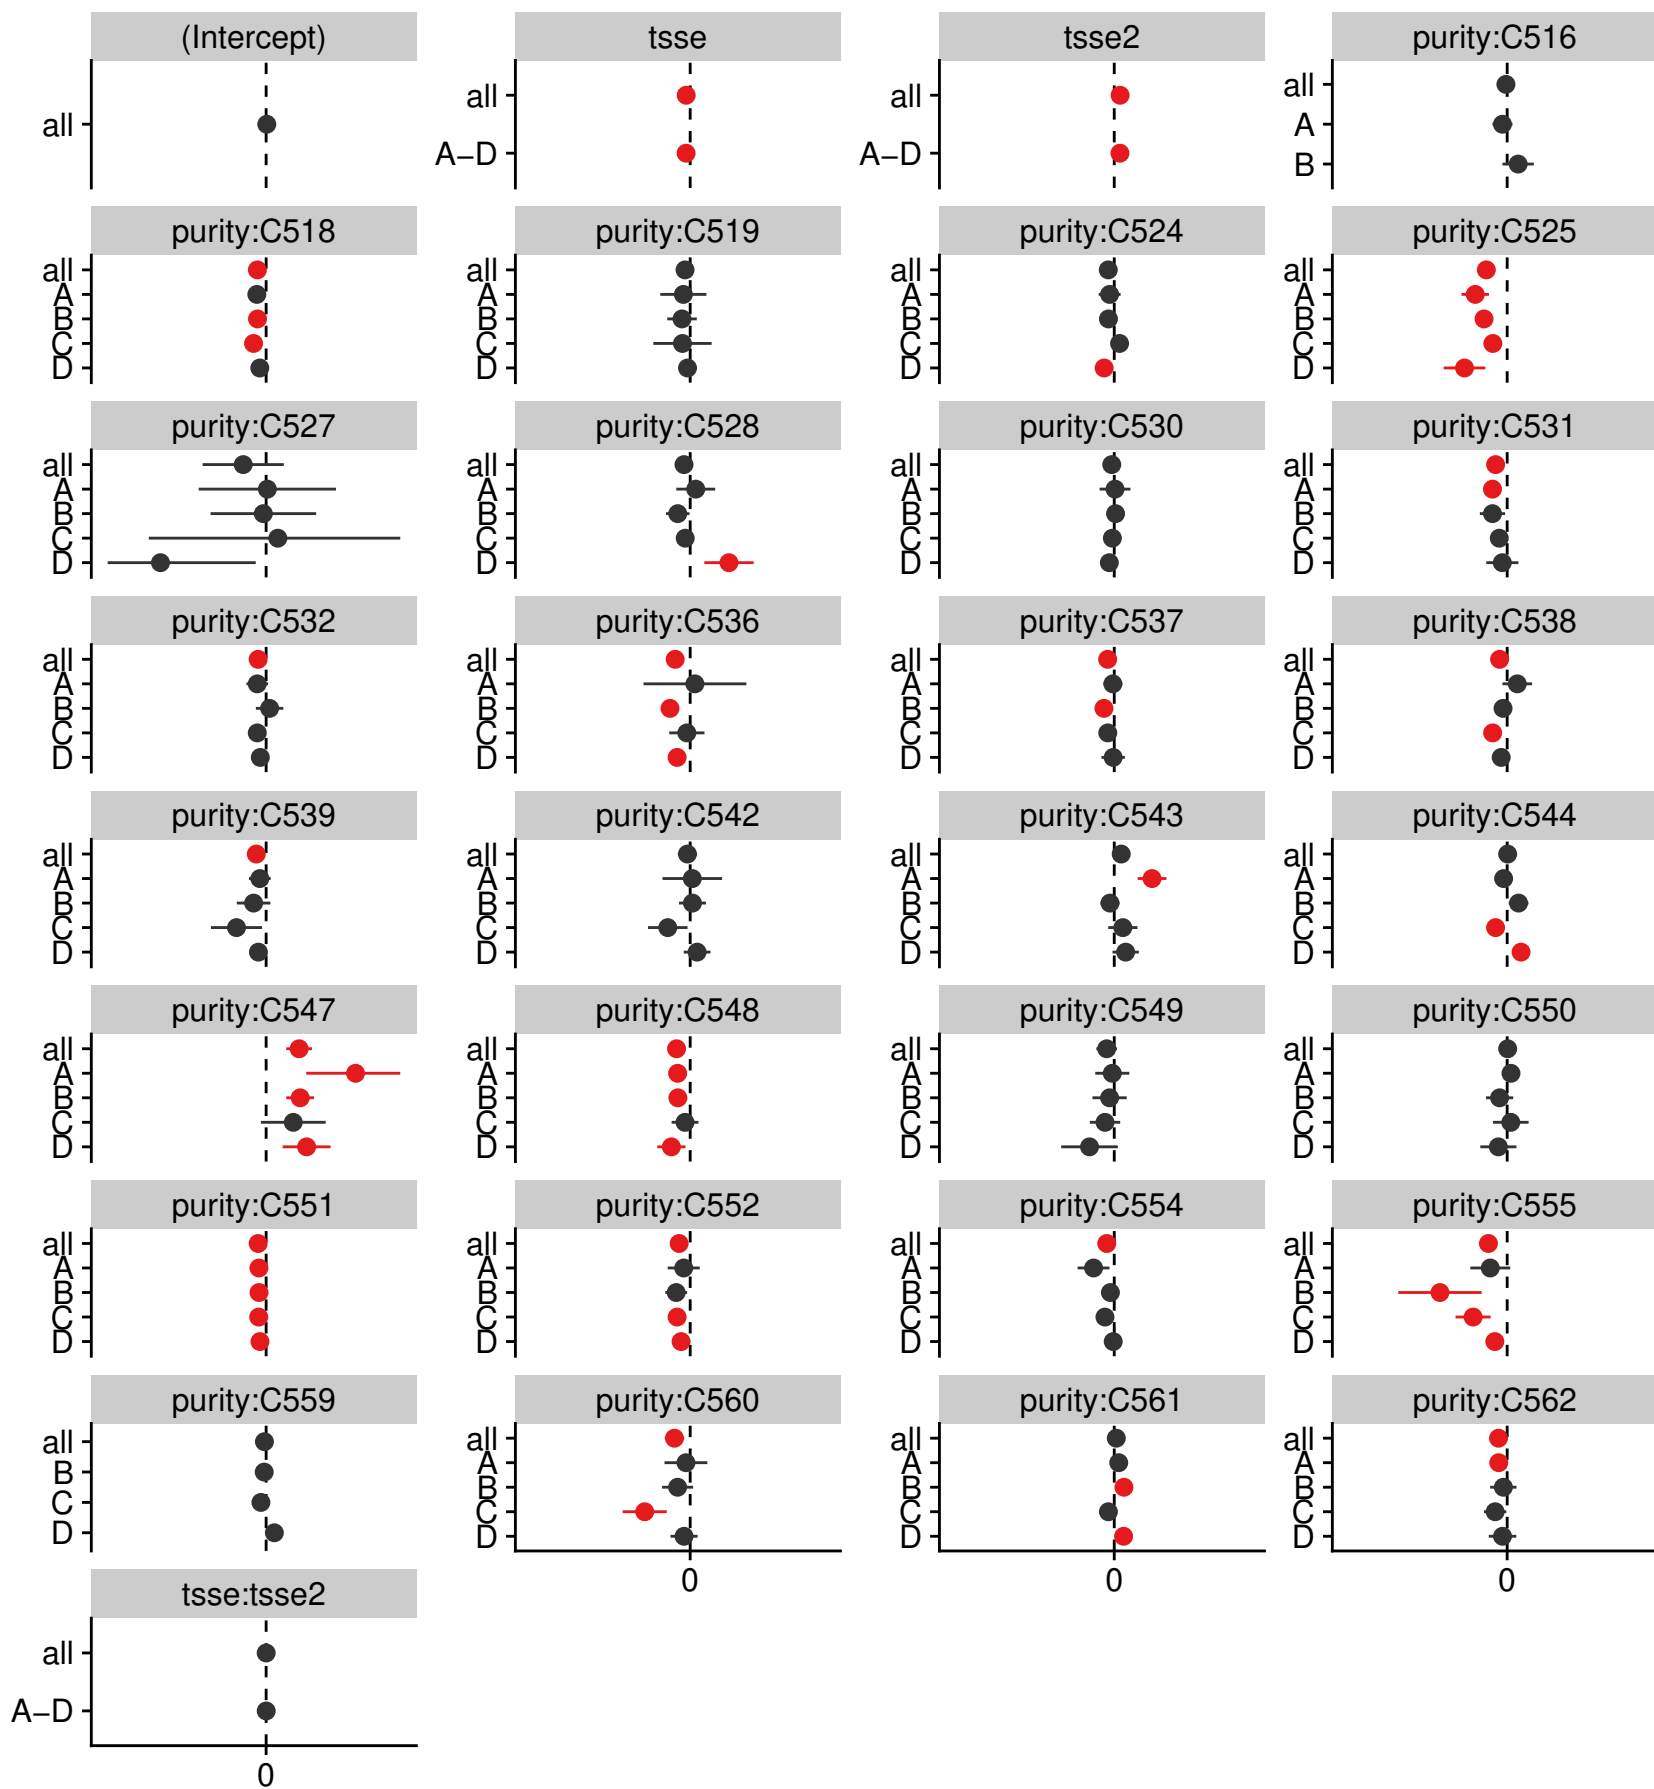

Coefficient

p\_c = < 2.22e-16, p\_sc = 8.9319e-11

# IRF8\_uc\_cTSS\_oPEAK

+ 3/33 (7/116), - 15/33 (15/116)

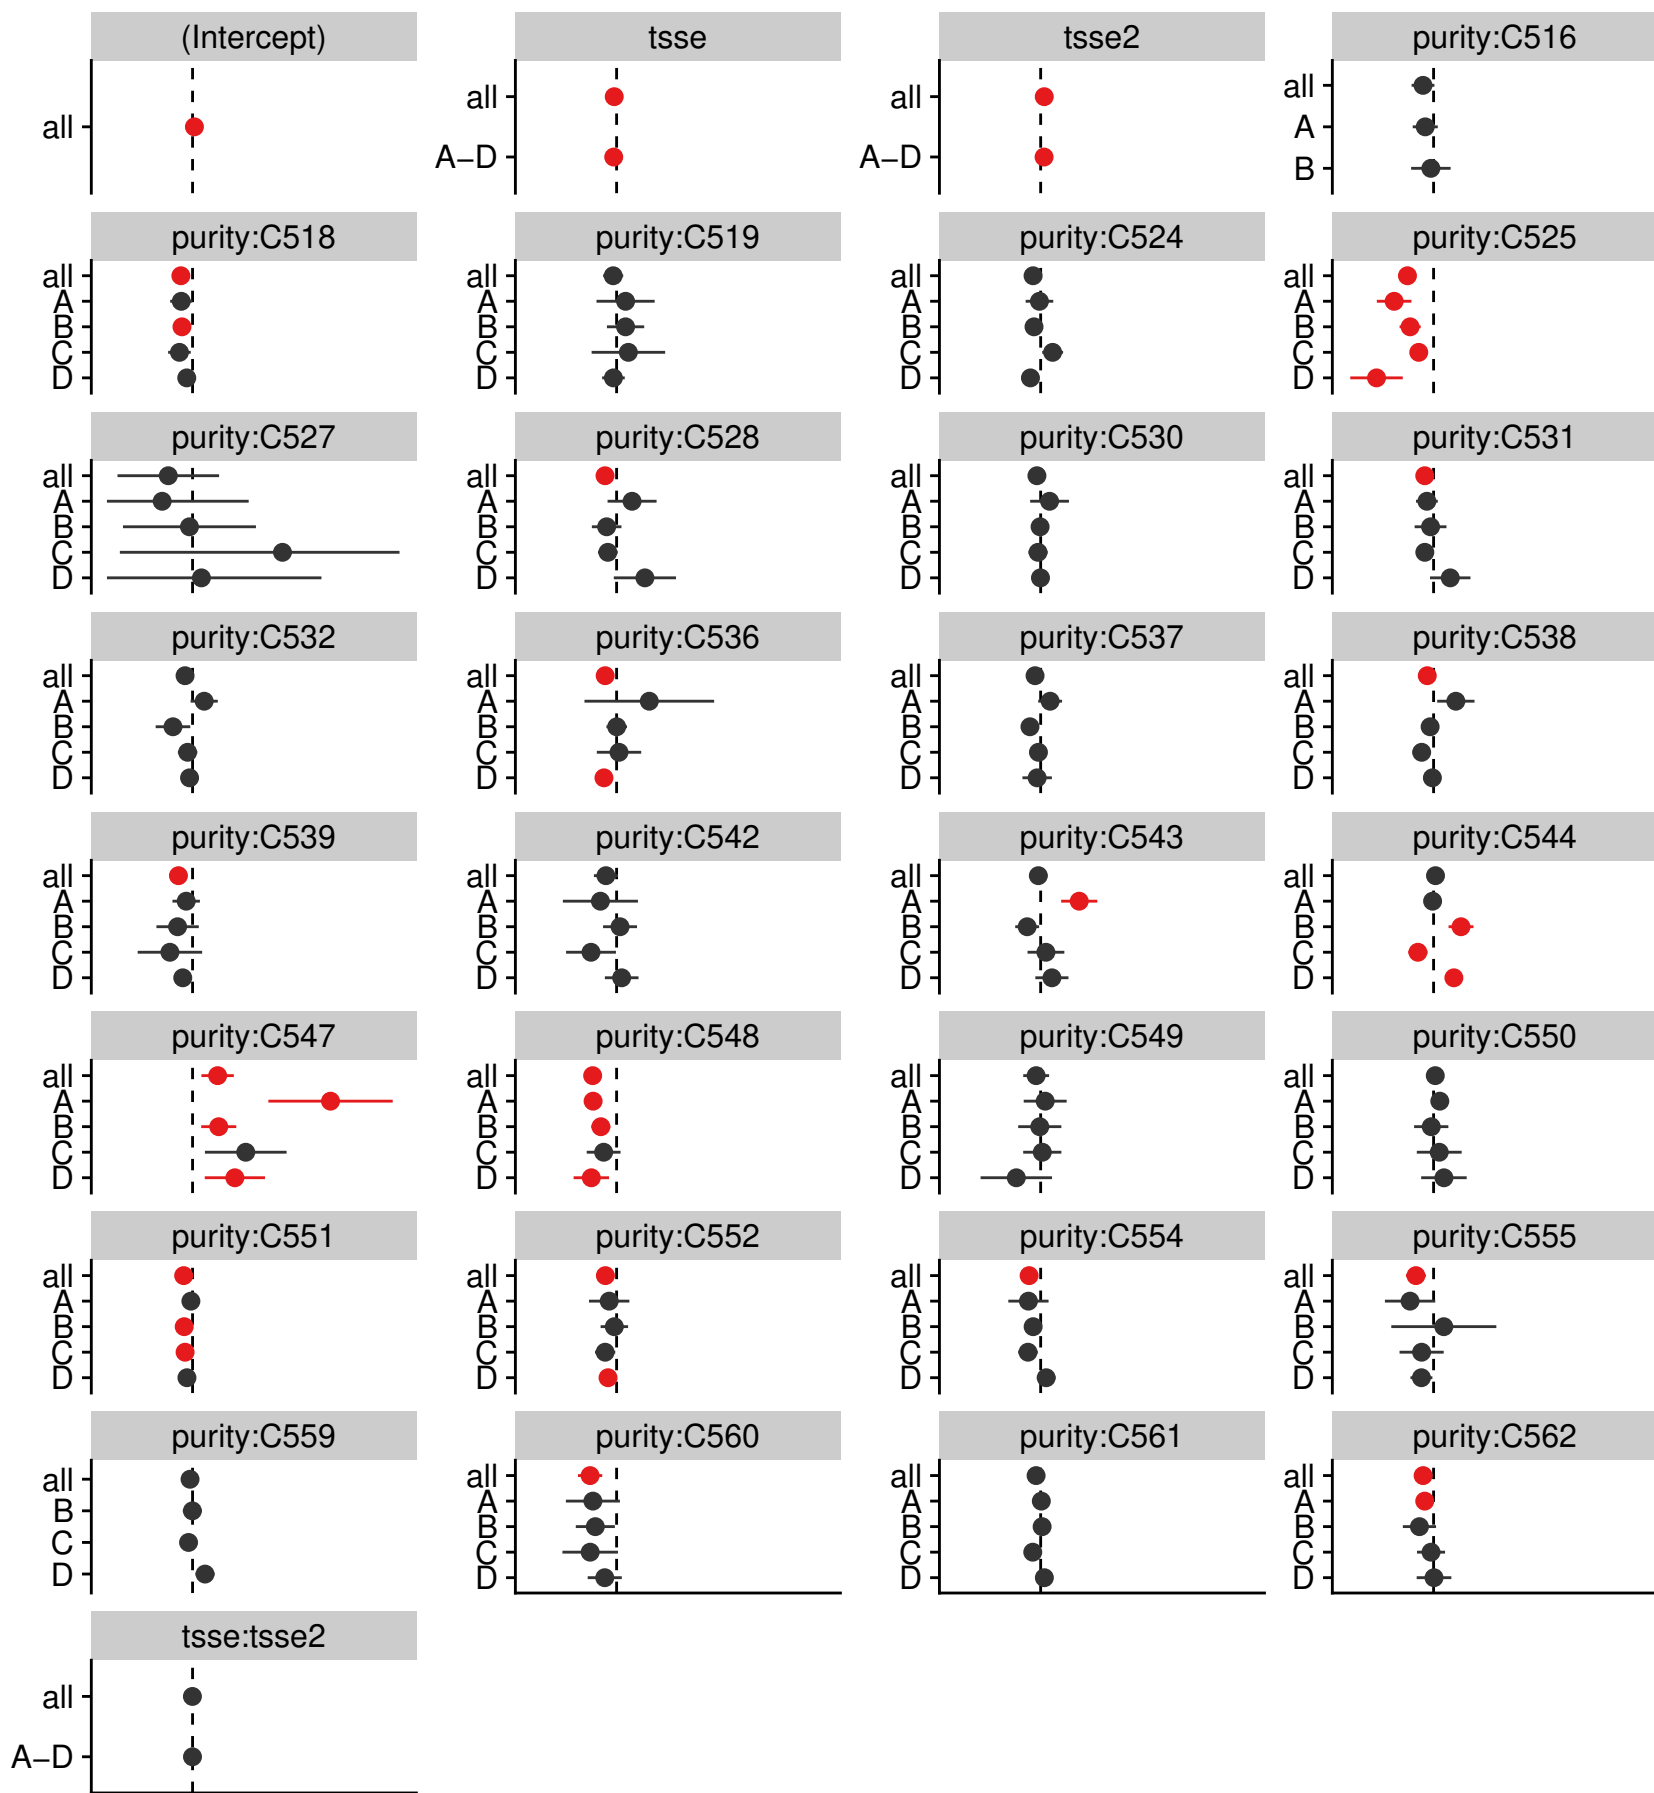

Coefficient

p\_c = < 2.22e-16, p\_sc = 1.5528e-09

# IRF8\_uc\_dTSS\_nPEAK

+ 2/33 (4/116), - 13/33 (25/116)

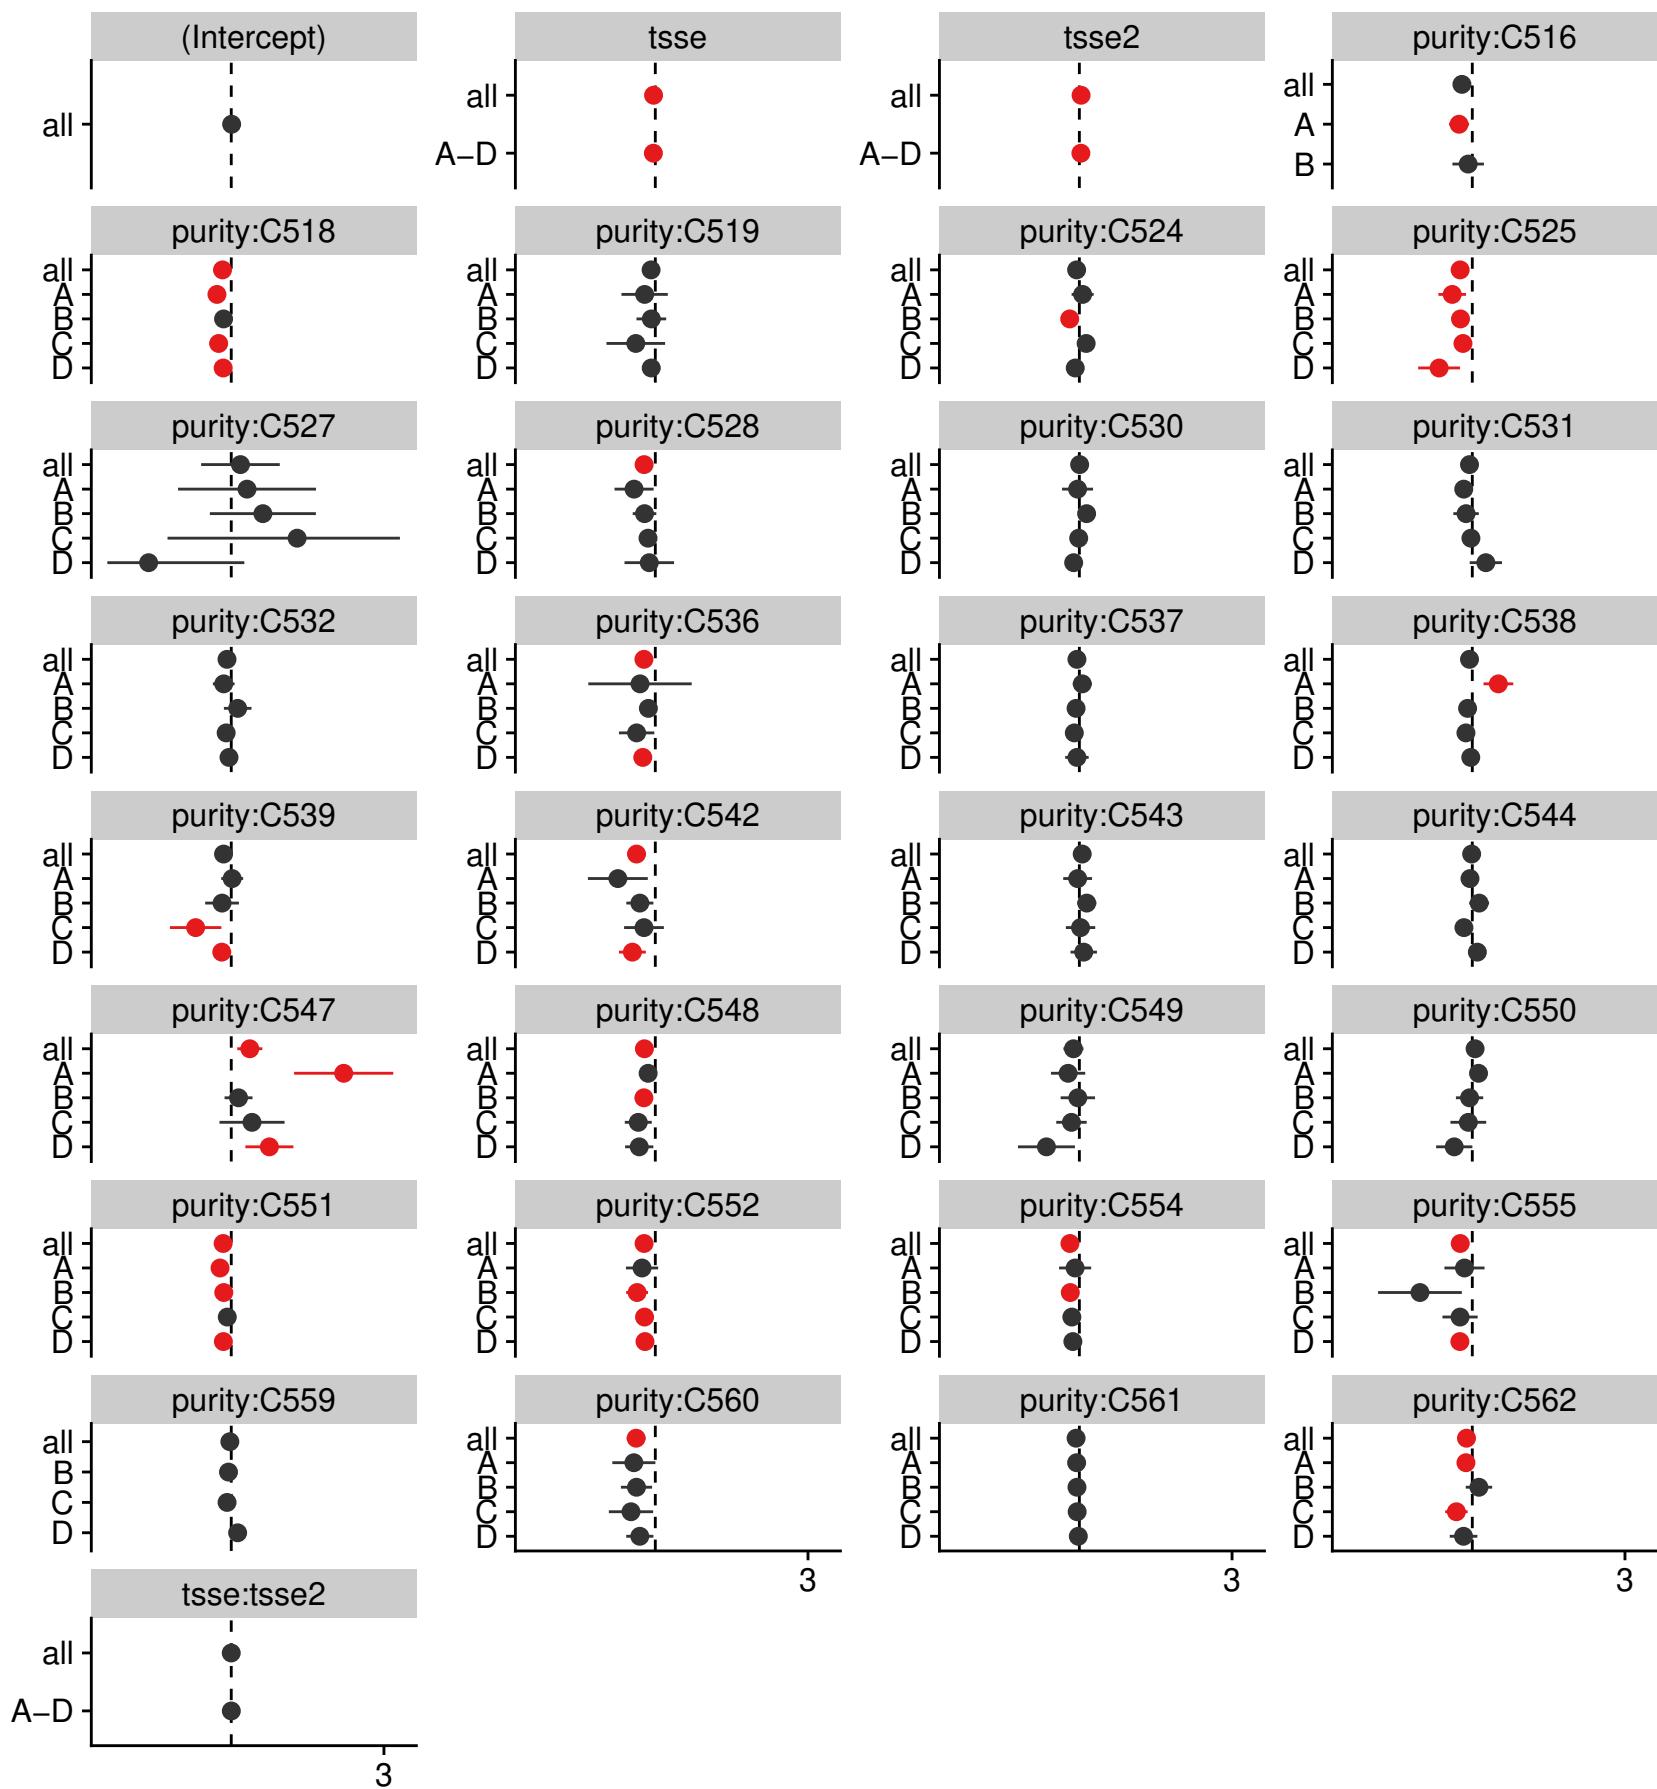

Coefficient

p\_c = < 2.22e-16, p\_sc = 0.0001982

# IRF8\_uc\_dTSS\_oPEAK

+ 3/33 (14/116), - 15/33 (14/116)

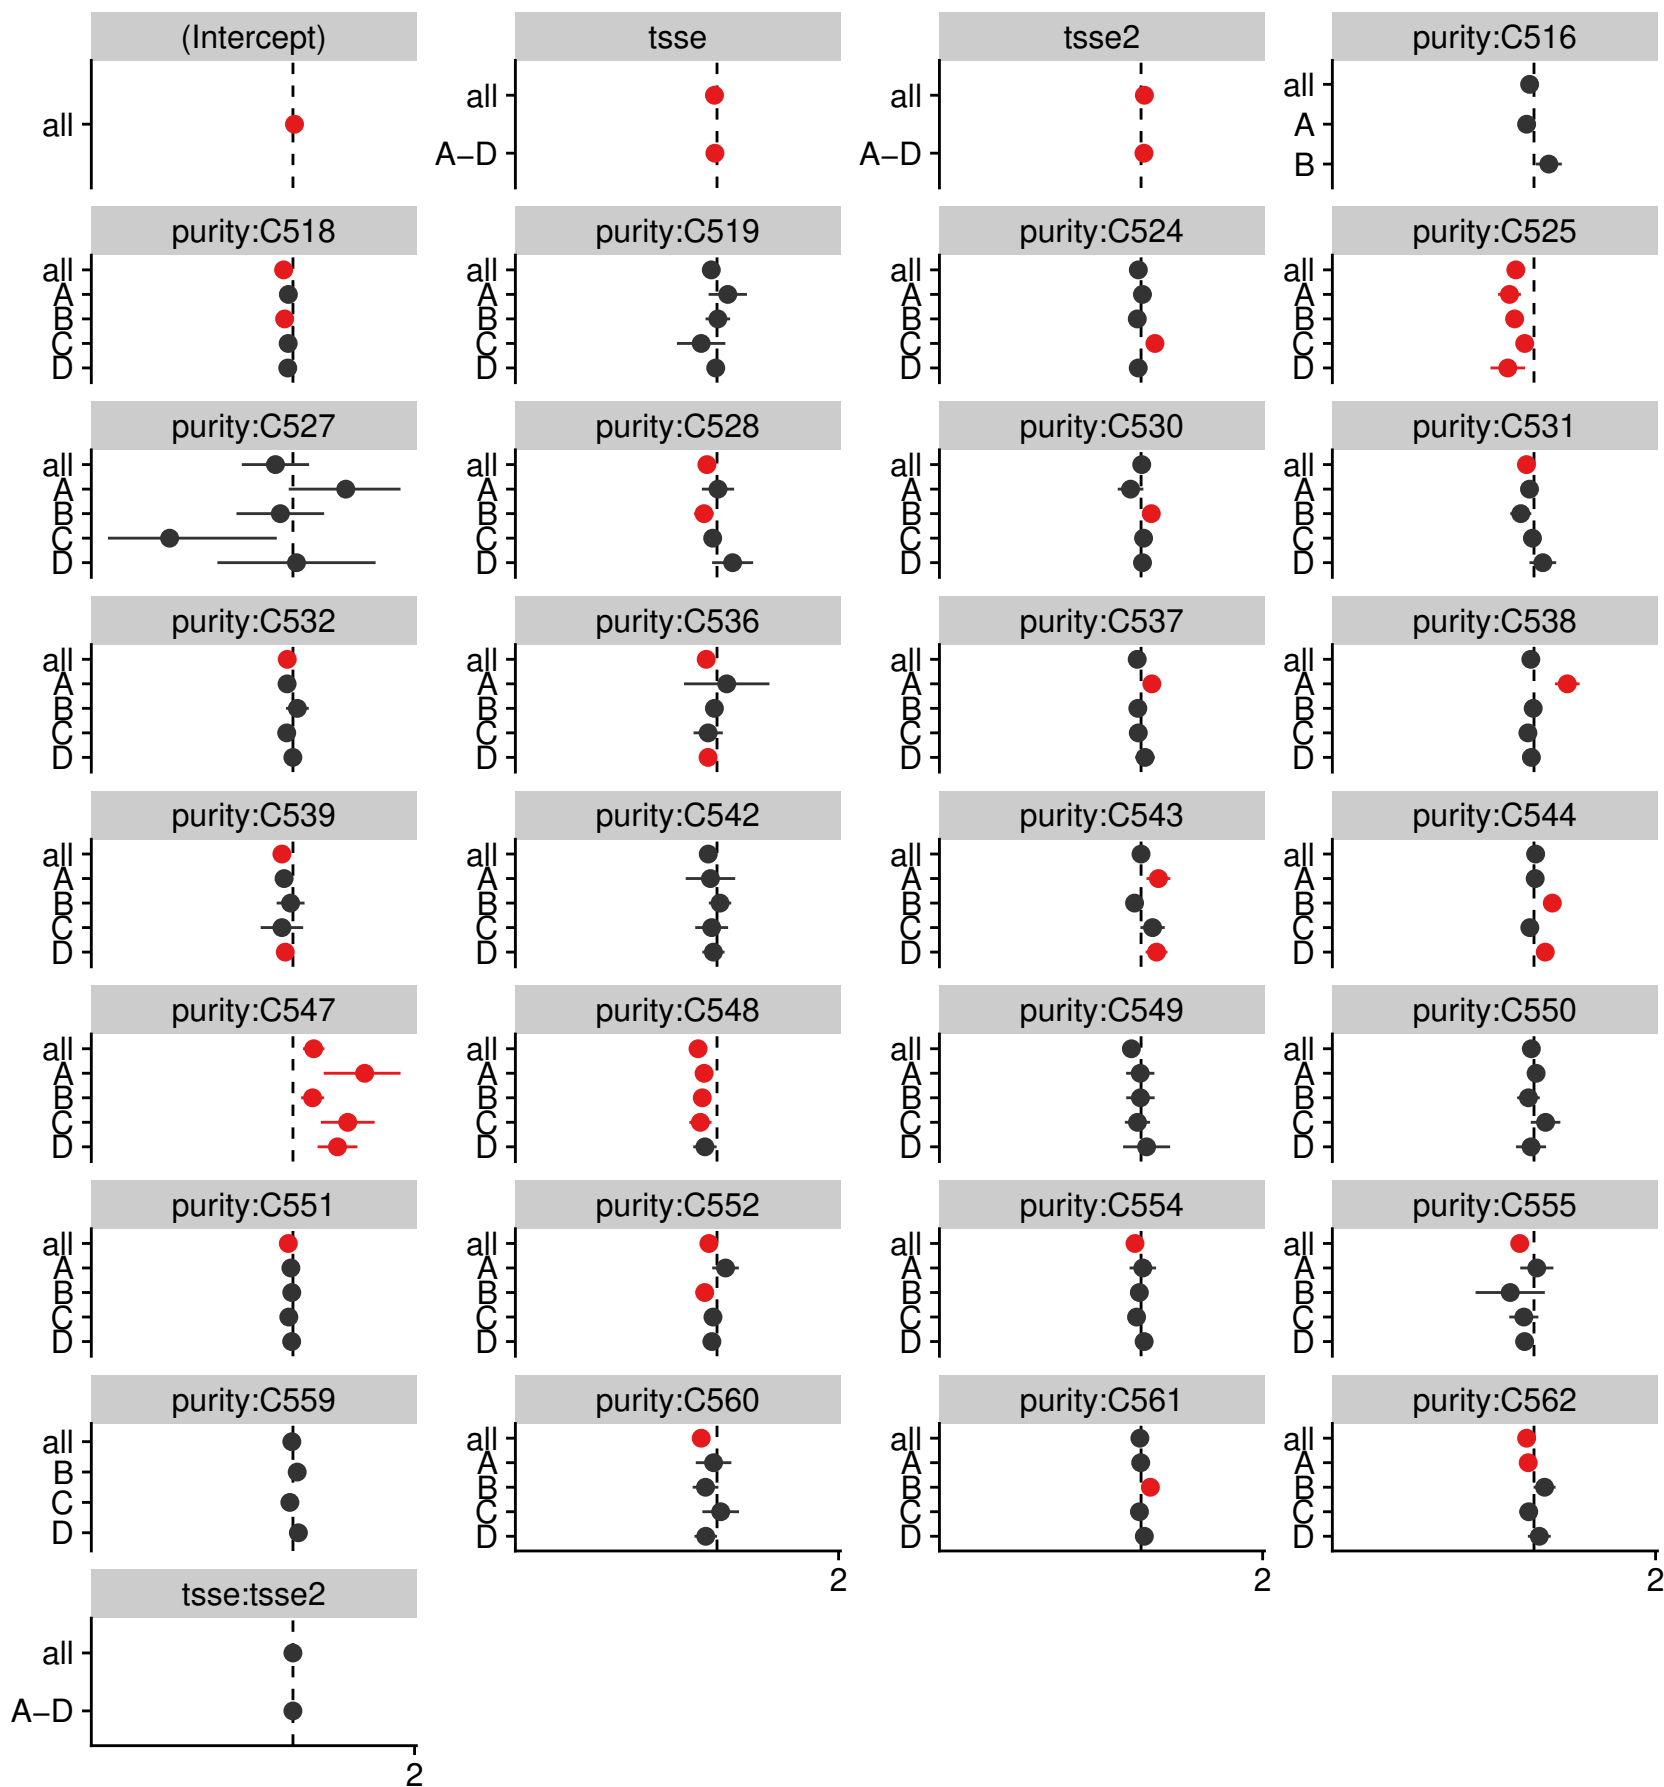

Coefficient

p\_c = < 2.22e-16, p\_sc = 1.9201e-10

# IRF9\_uc\_cTSS\_oPEAK

+ 2/33 (7/116), - 19/33 (33/116)

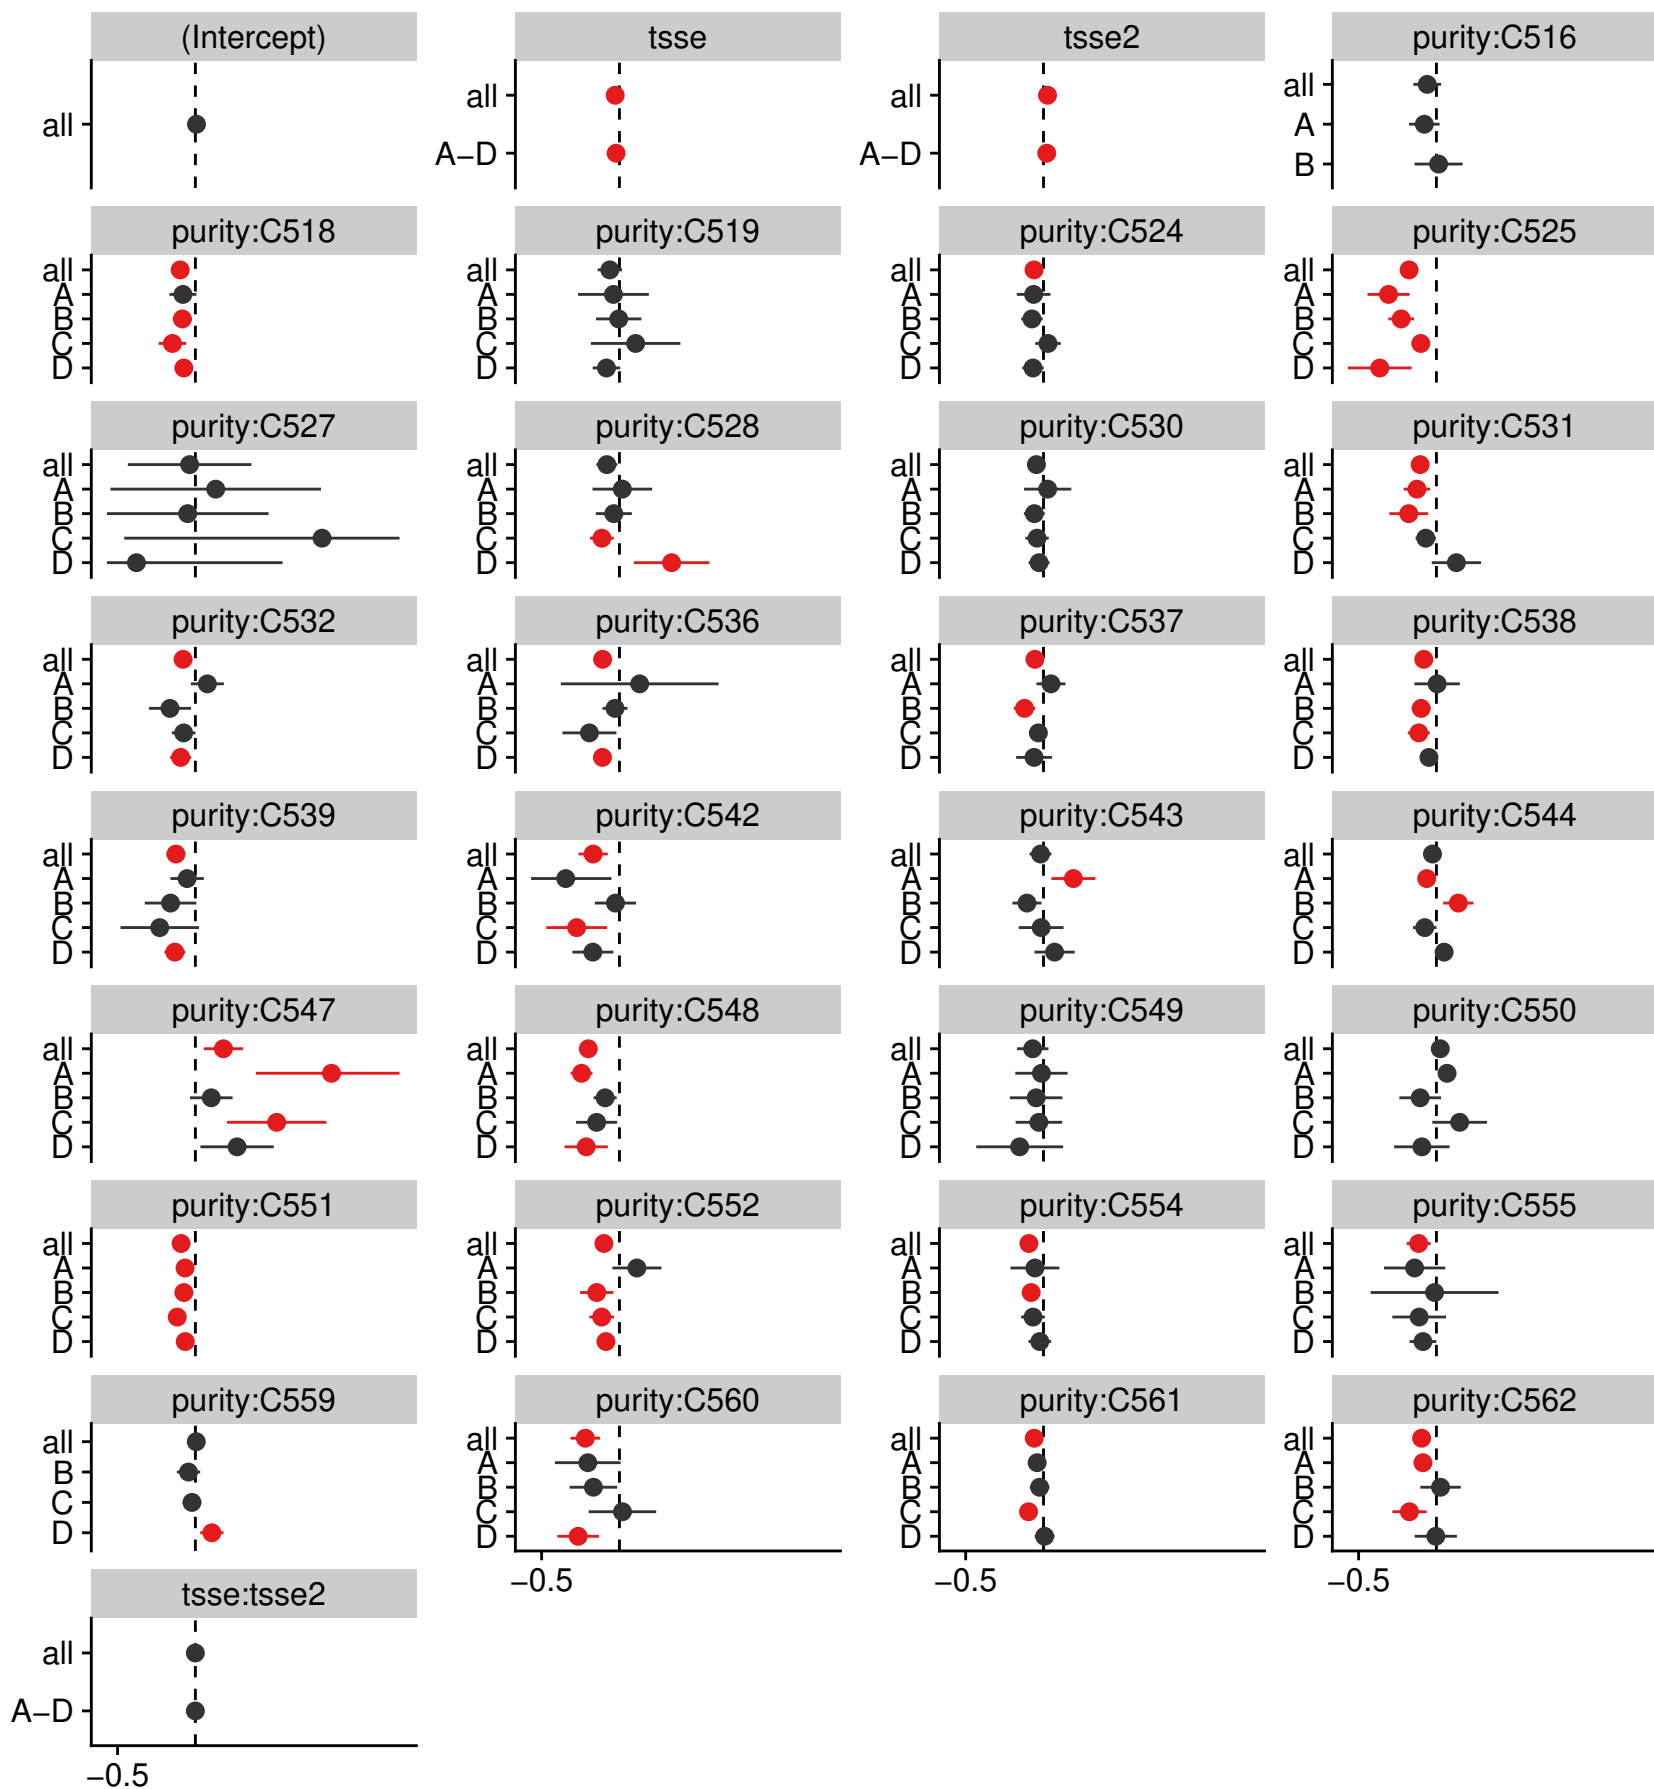

Coefficient

p\_c = < 2.22e-16, p\_sc = 1.9339e-09



# IRF9\_uc\_dTSS\_oPEAK

+ 3/33 (14/116), - 17/33 (15/116)

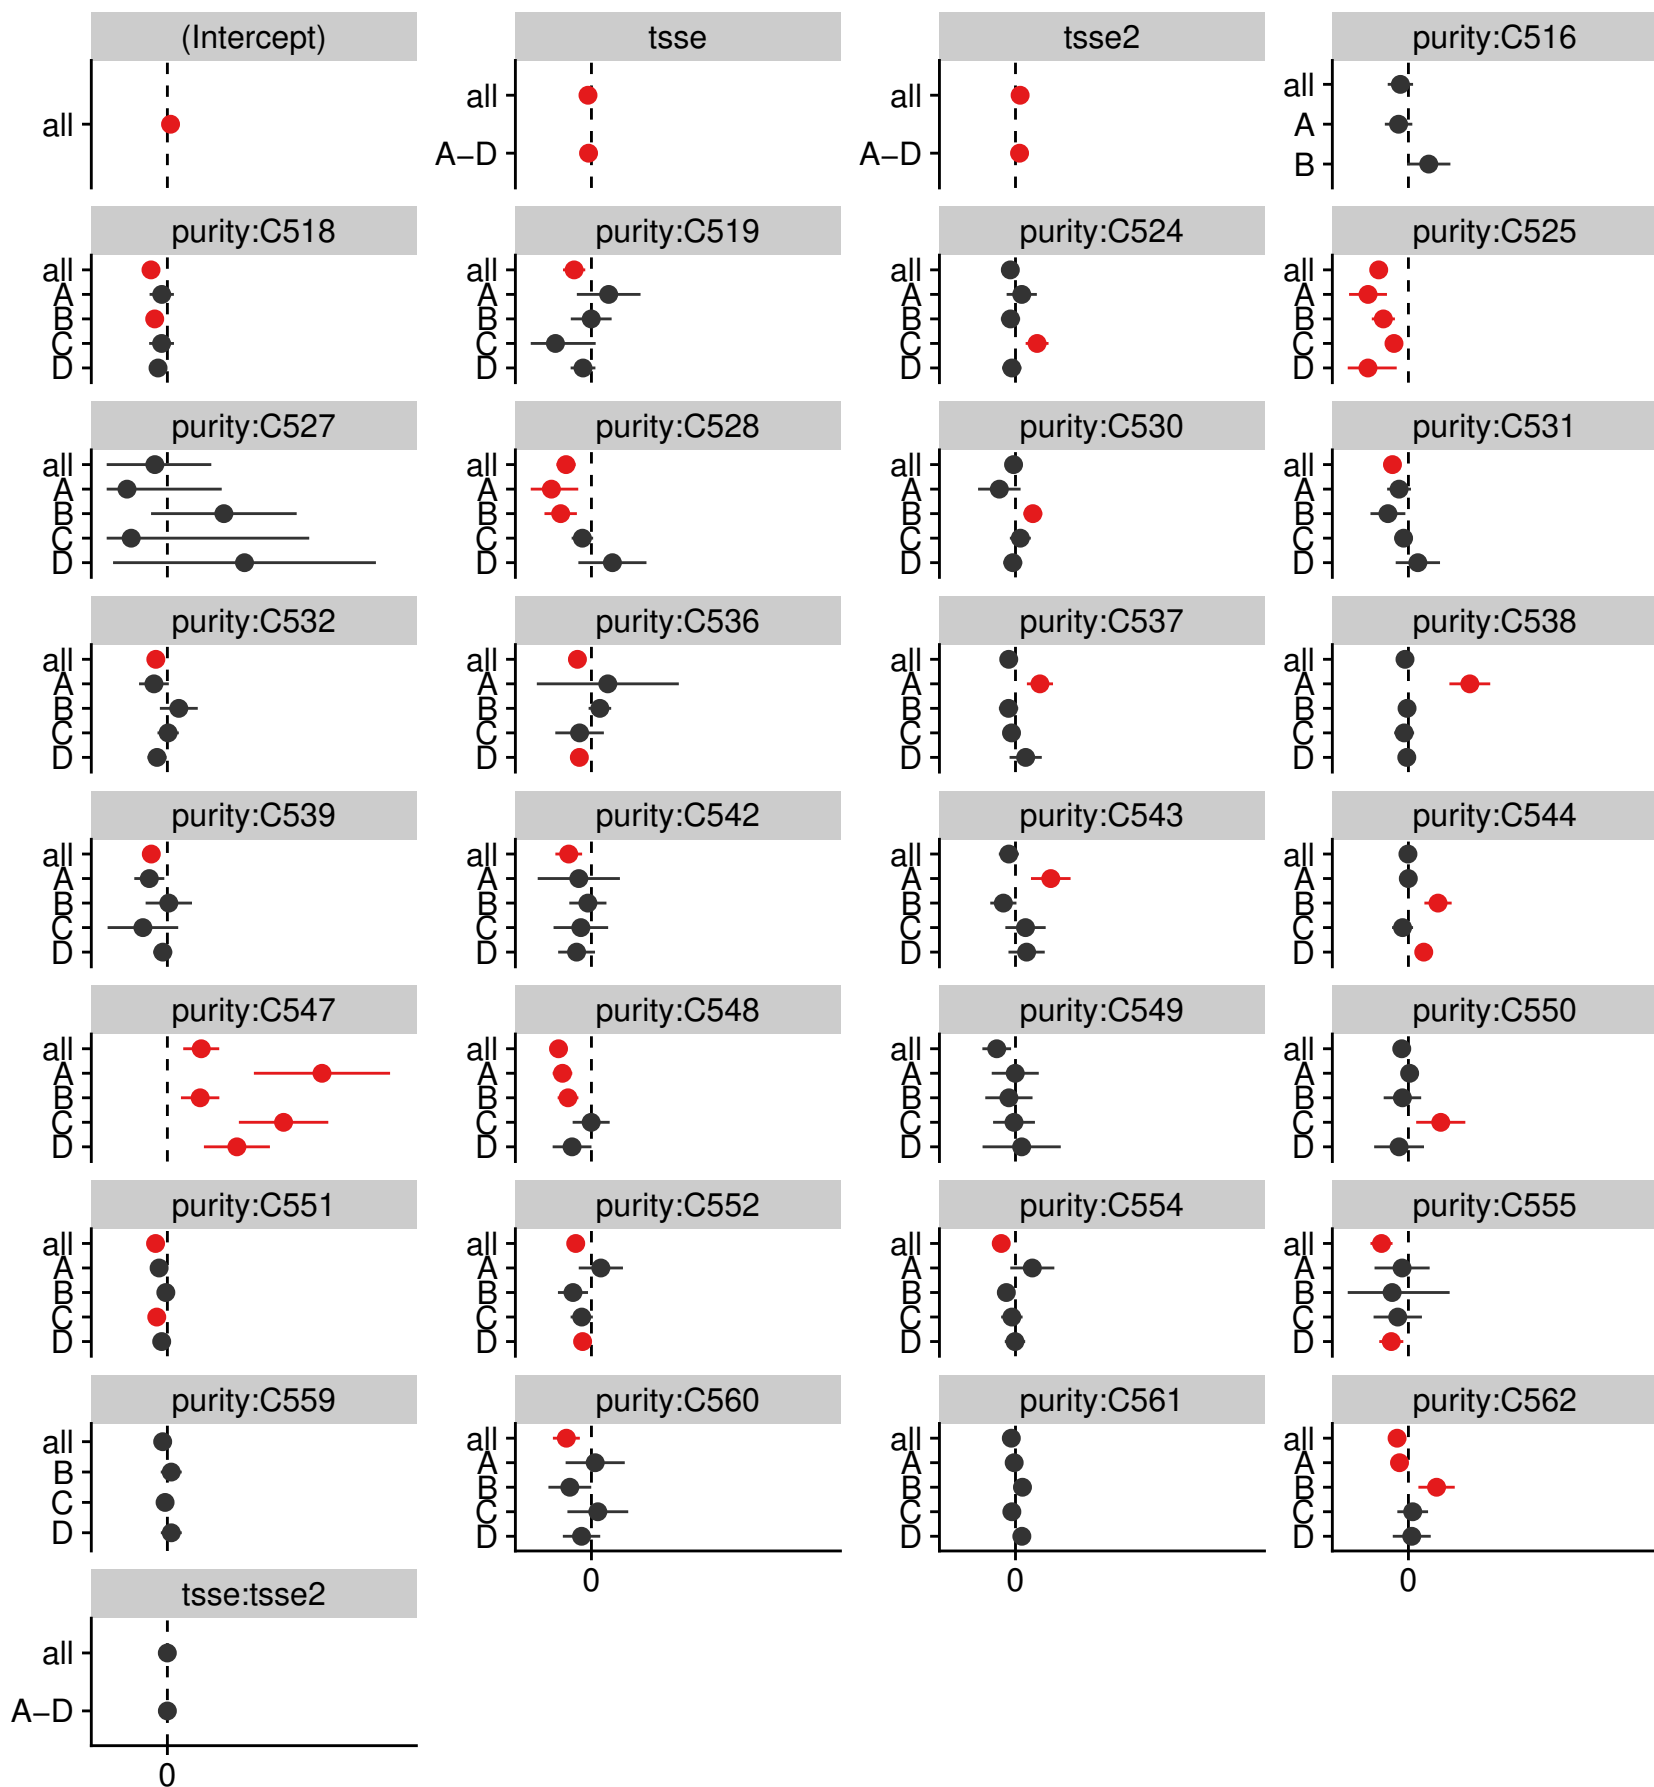

$p_c = < 2.22e-16$ ,  $p_{sc} = 1.7335e-12$

# ISL1\_uc\_dTSS\_oPEAK

+ 15/33 (1/116), - 3/33 (22/116)

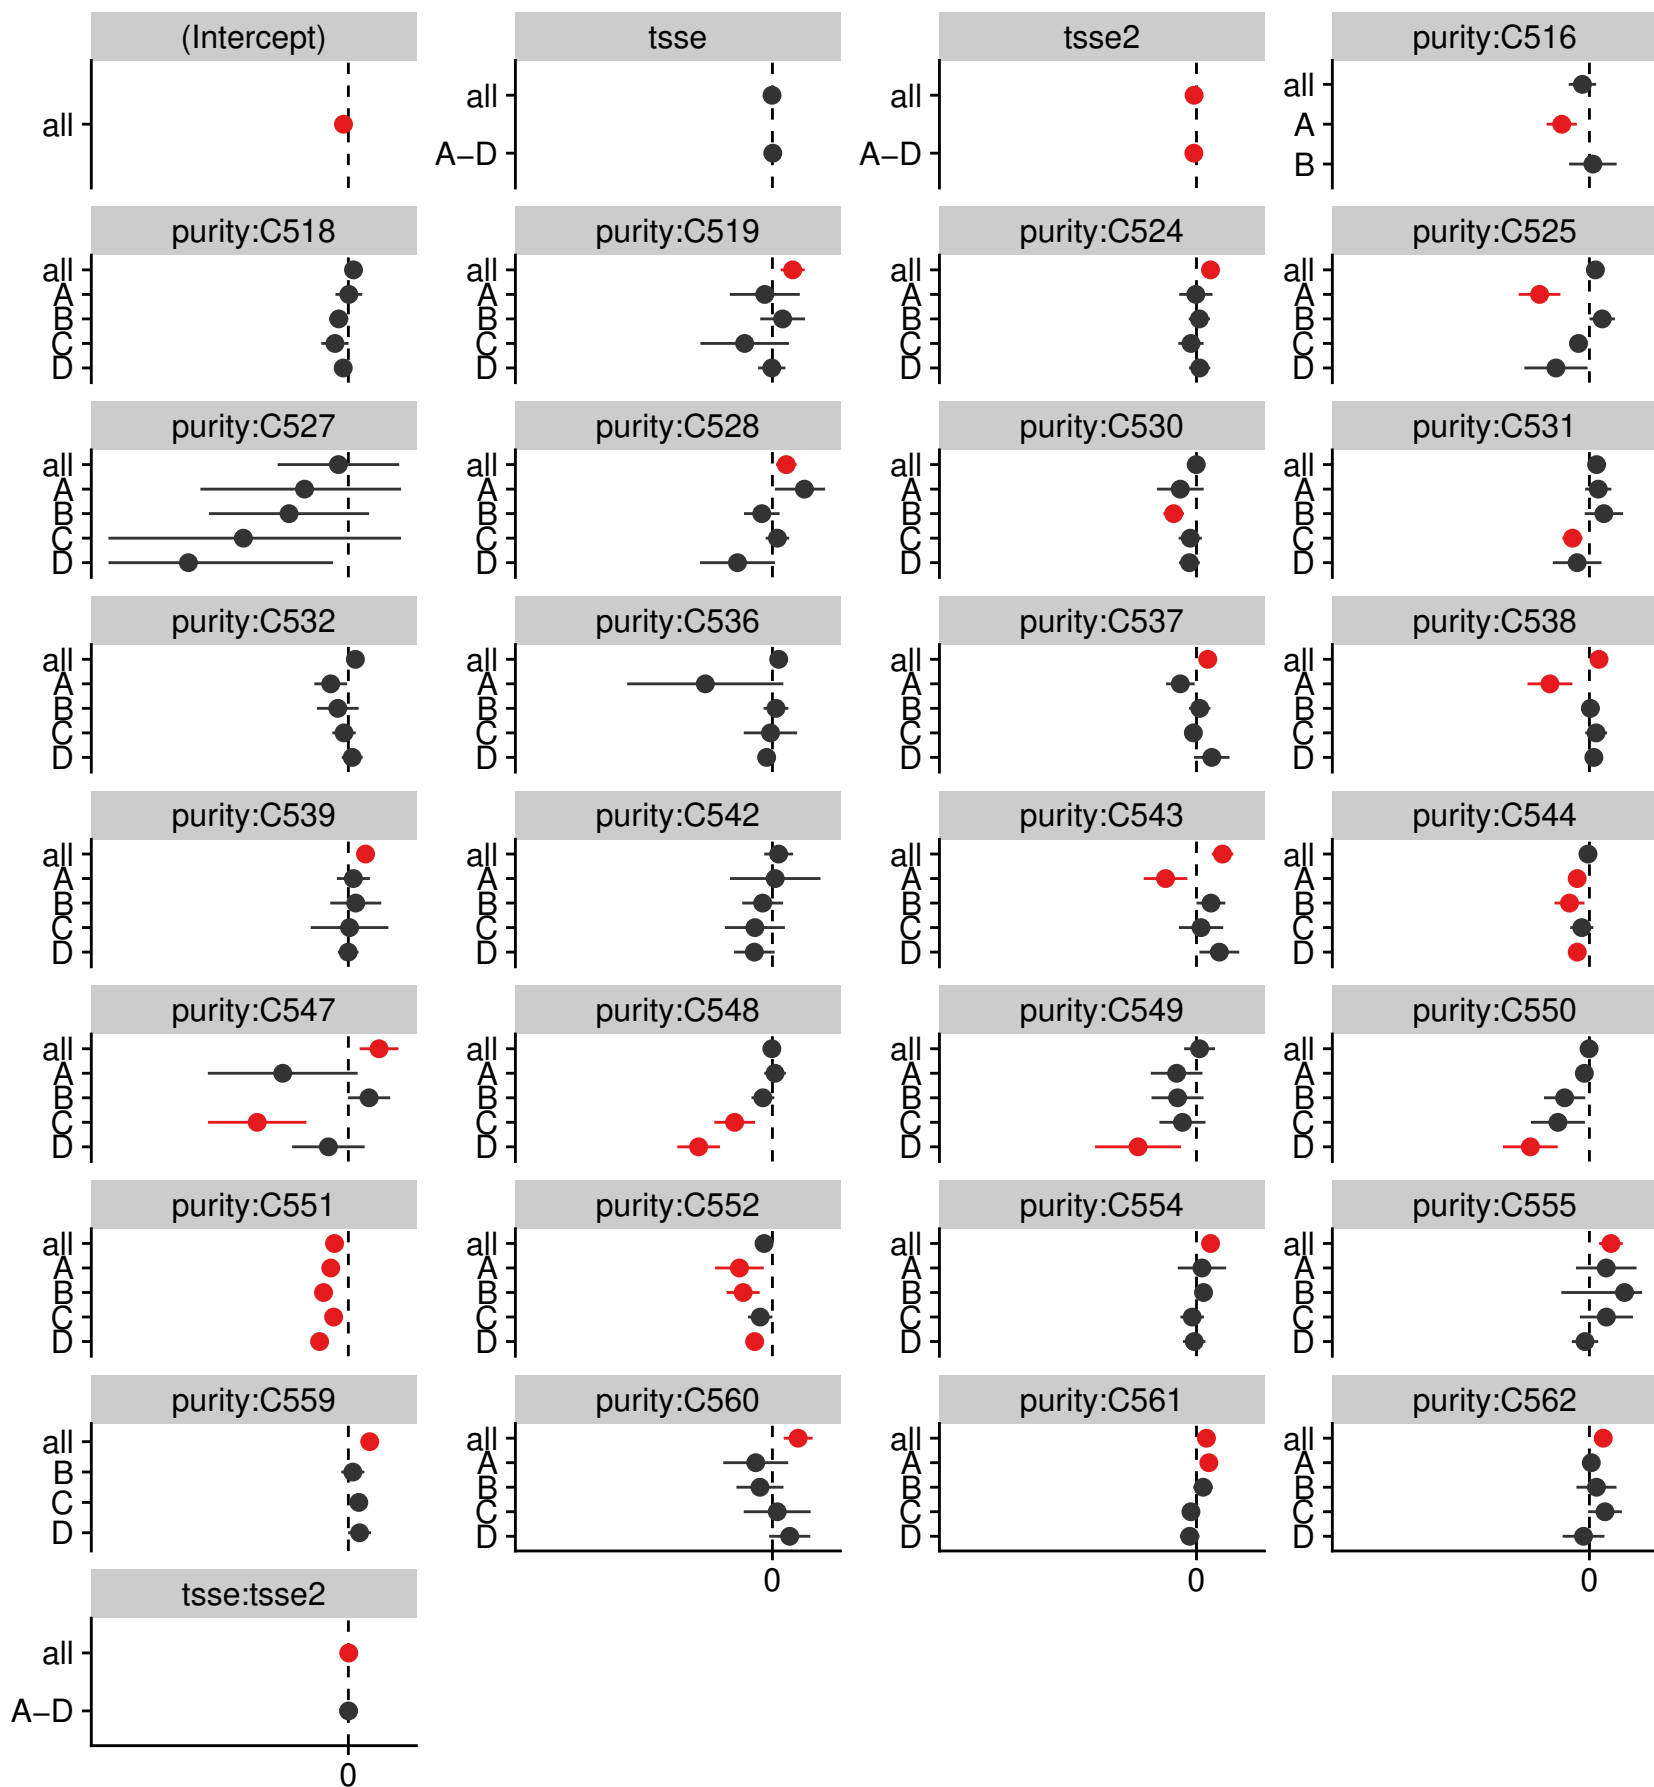

Coefficient

p\_c = < 2.22e-16, p\_sc = 2.8916e-08

# JDP2\_uc\_cTSS\_nPEAK

+ 12/33 (24/116), - 1/33 (3/116)

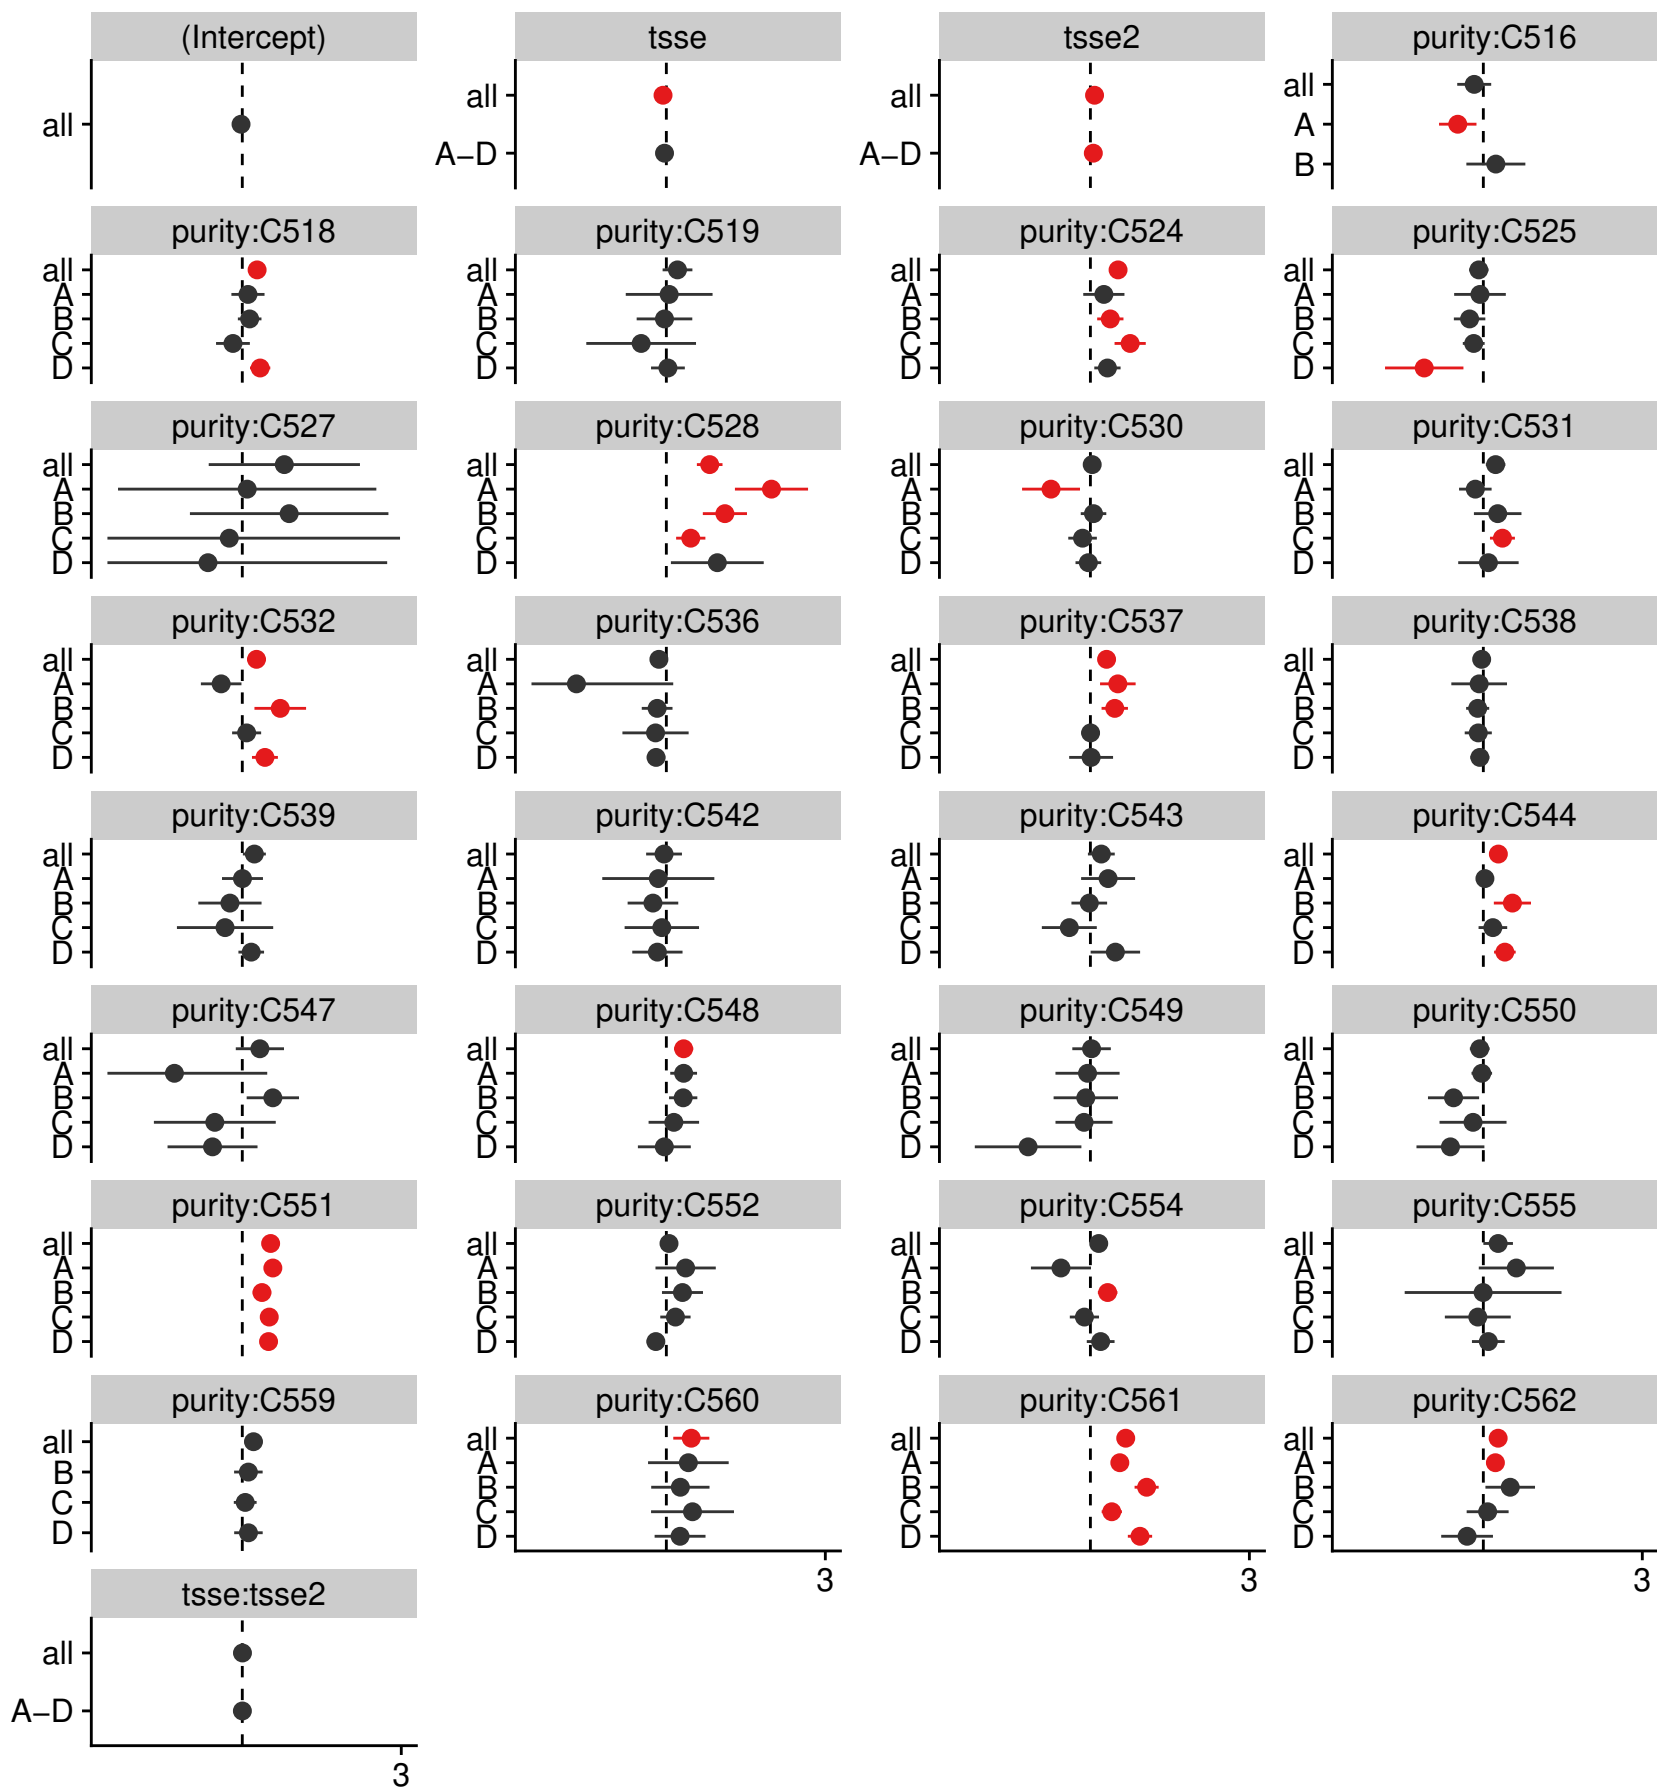

p\_c = < 2.22e-16, p\_sc = 5.6036e-09

# KLF16\_uc\_pTSS\_nPEAK

+ 3/33 (5/116), - 14/33 (43/116)

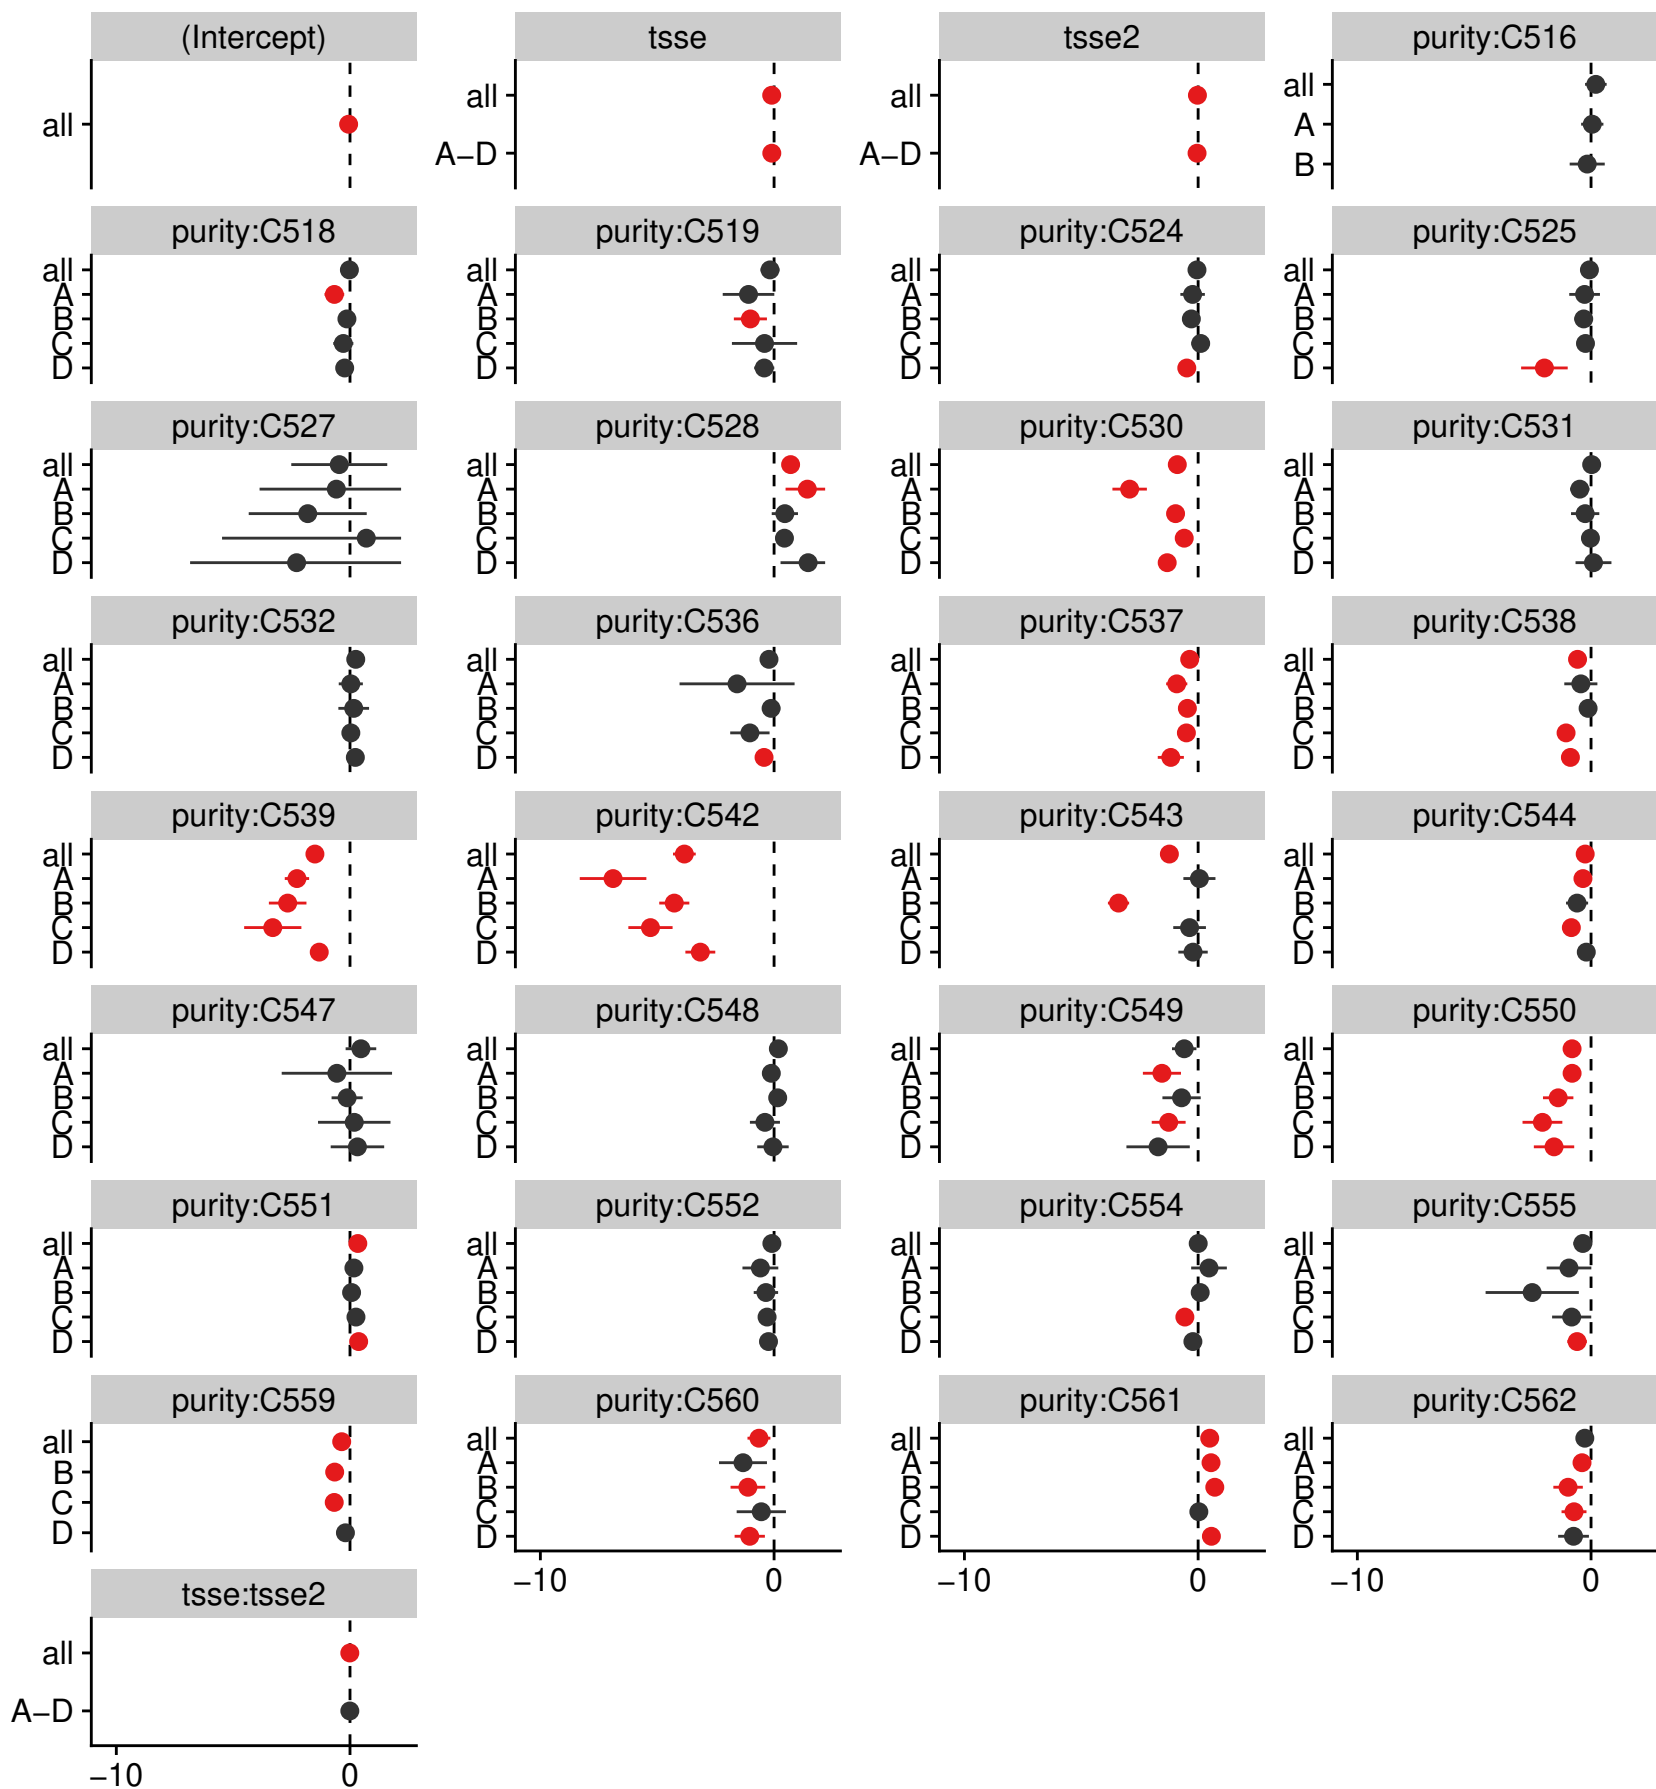

p\_c = < 2.22e-16, p\_sc = < 2.22e-16

# LHX4\_uc\_cTSS\_nPEAK

+ 10/33 (1/116), - 4/33 (39/116)

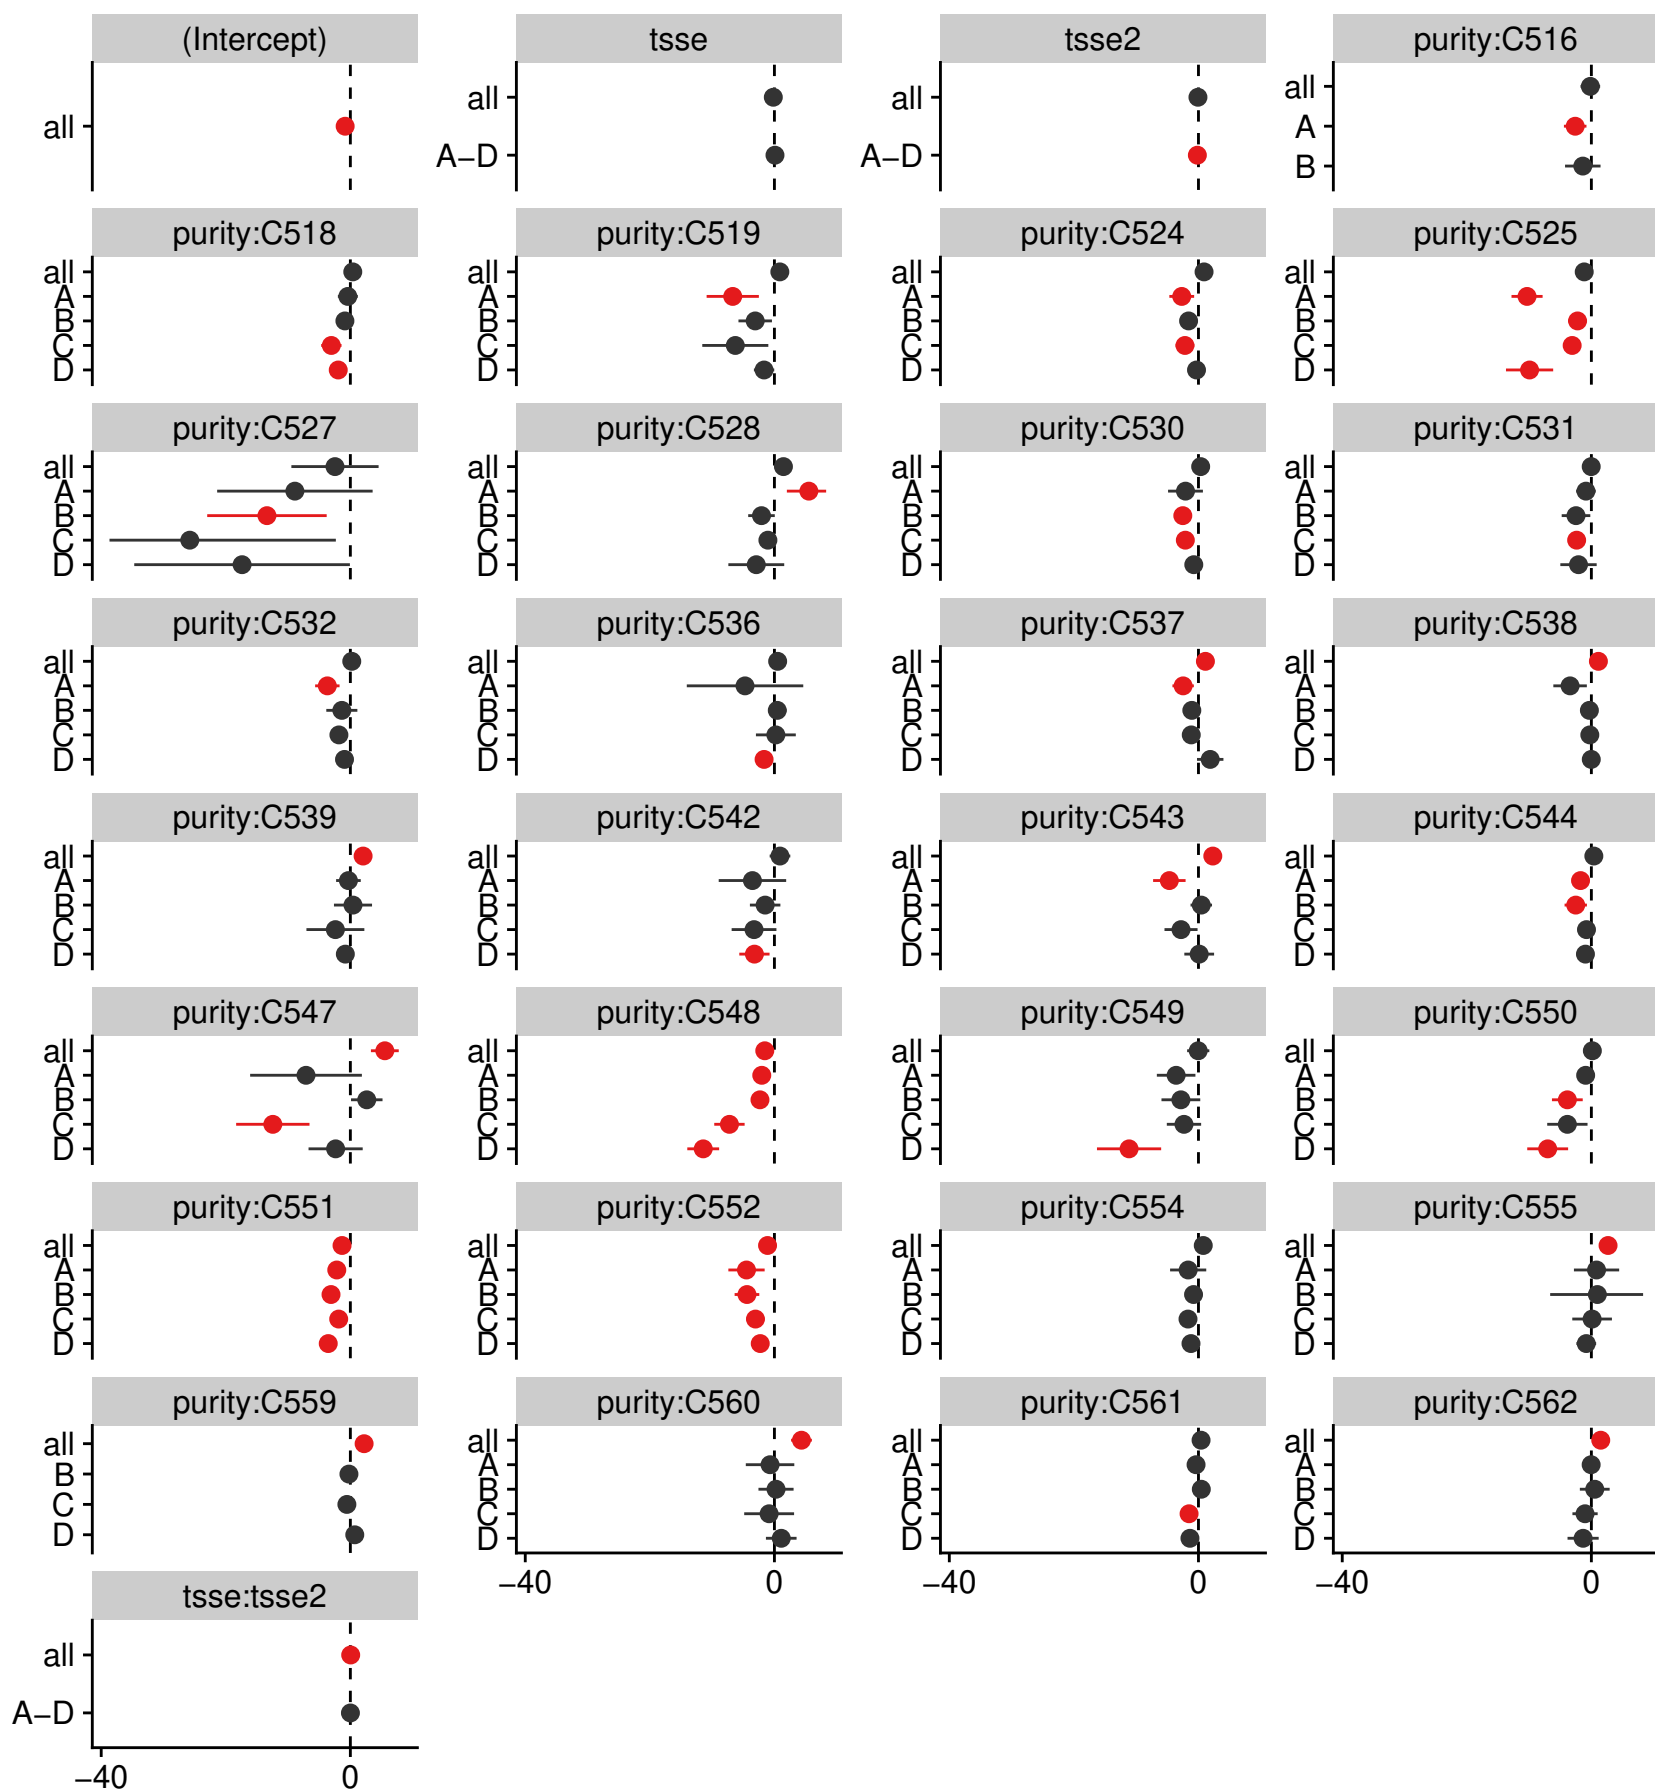

Coefficient

$p_c = < 2.22e-16$ ,  $p_{sc} = 0.021685$

# LHX4\_uc\_dTSS\_oPEAK

+ 12/33 (0/116), - 4/33 (42/116)



$p_c = < 2.22e-16$ ,  $p_{sc} = 0.019451$

# LHX6\_uc\_dTSS\_nPEAK

+ 14/33 (0/116), - 5/33 (39/116)

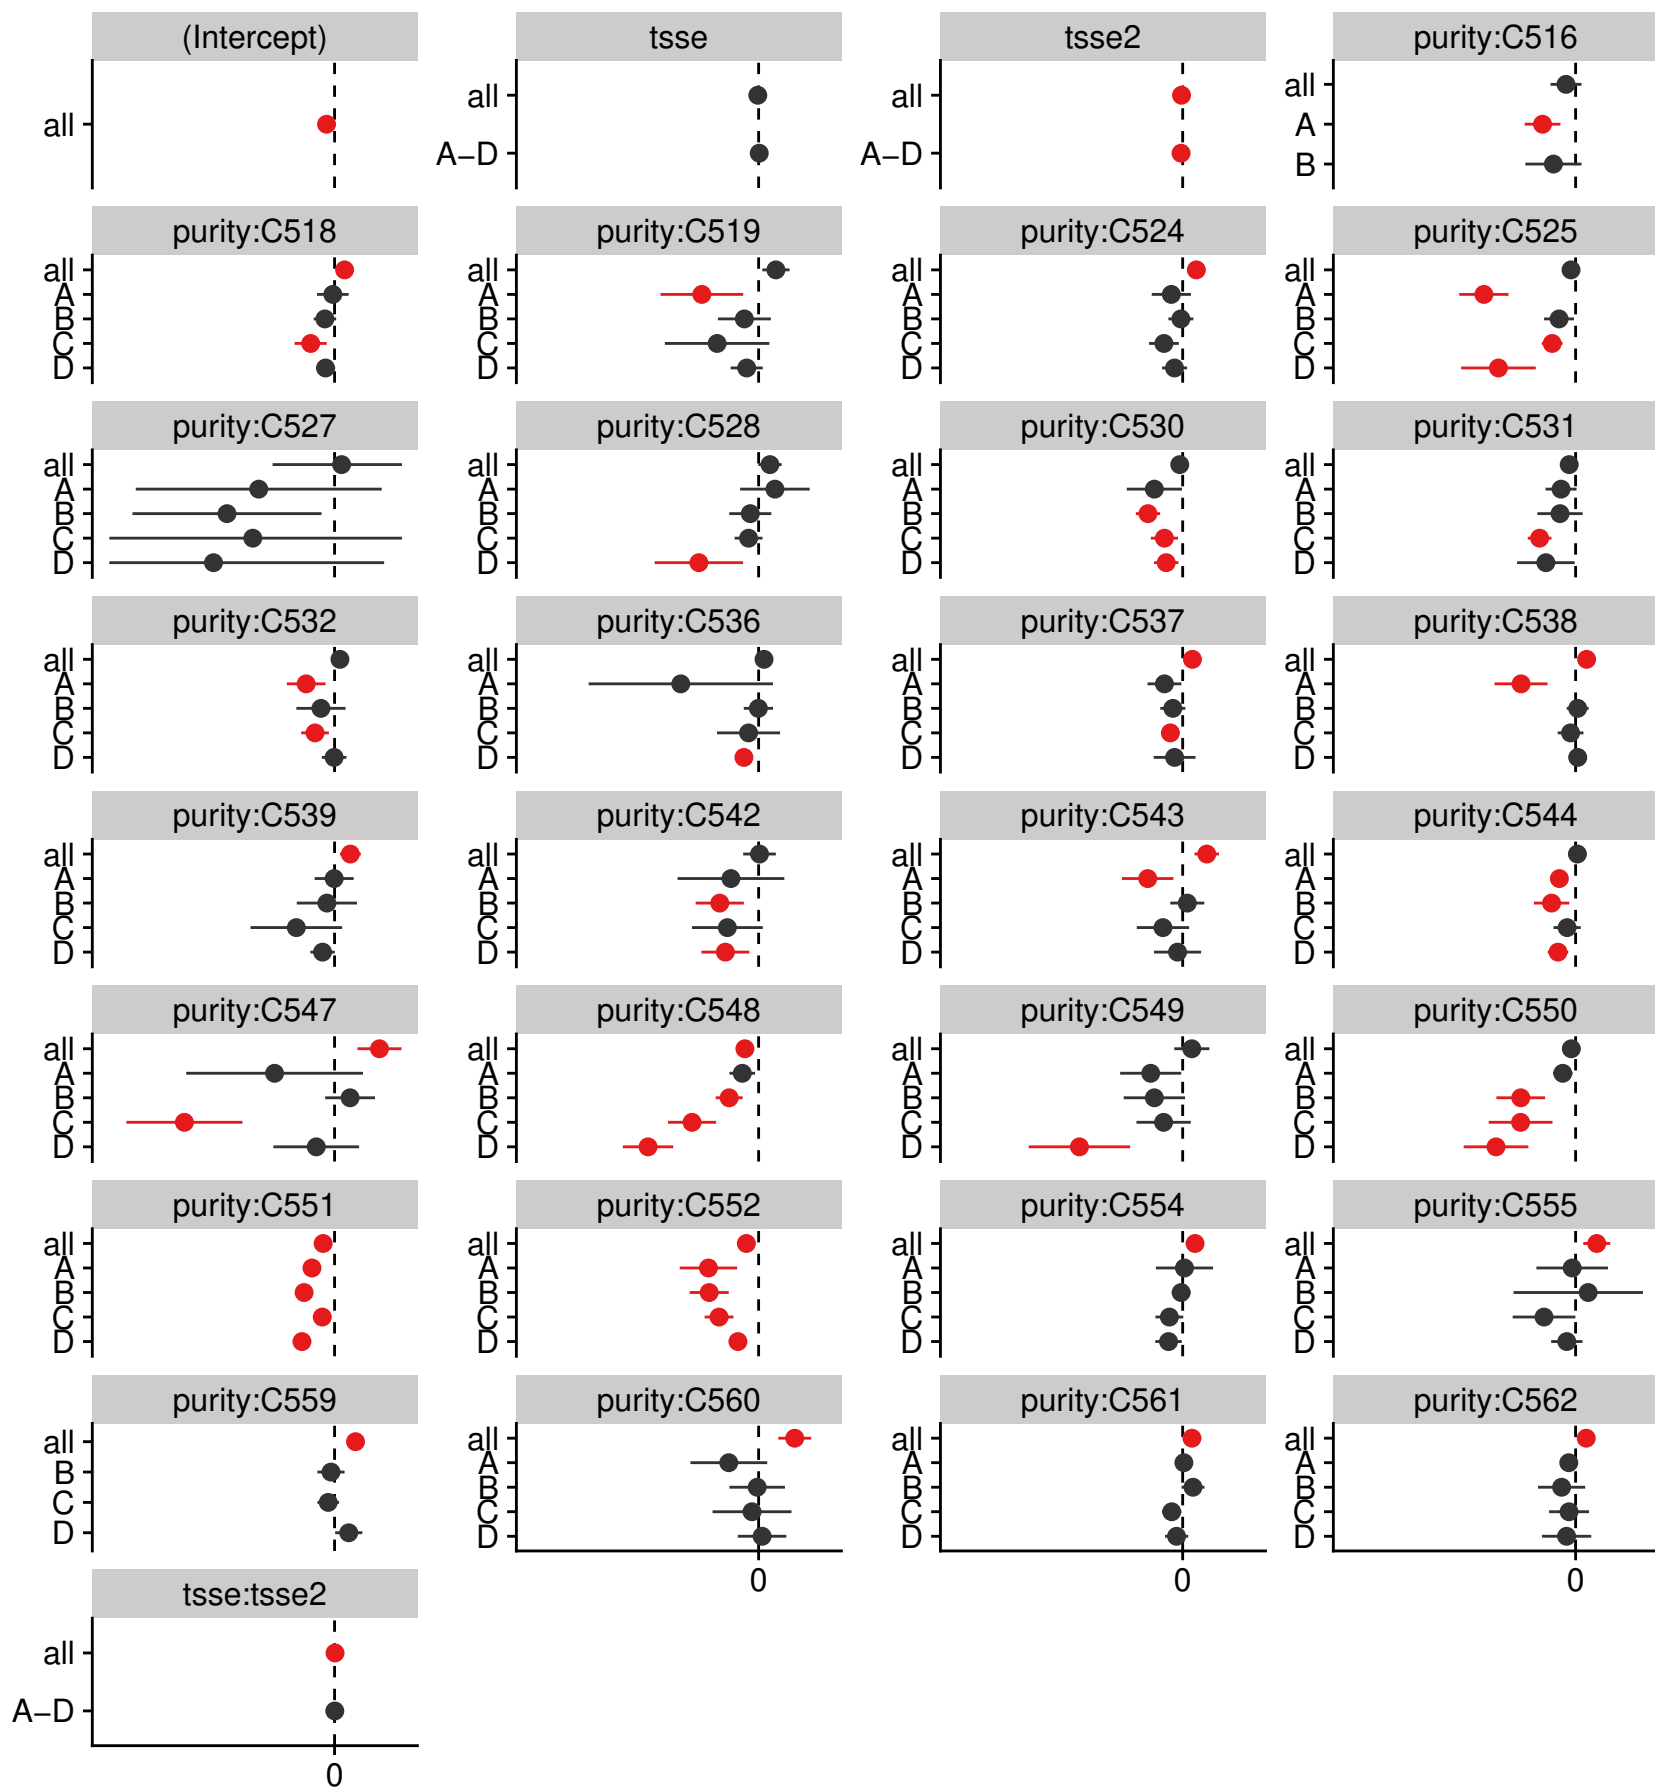

Coefficient

$p_c = < 2.22e-16$ ,  $p_{sc} = 0.026254$

# LMX1A\_uc\_dTSS\_nPEAK

+ 14/33 (1/116), - 4/33 (43/116)

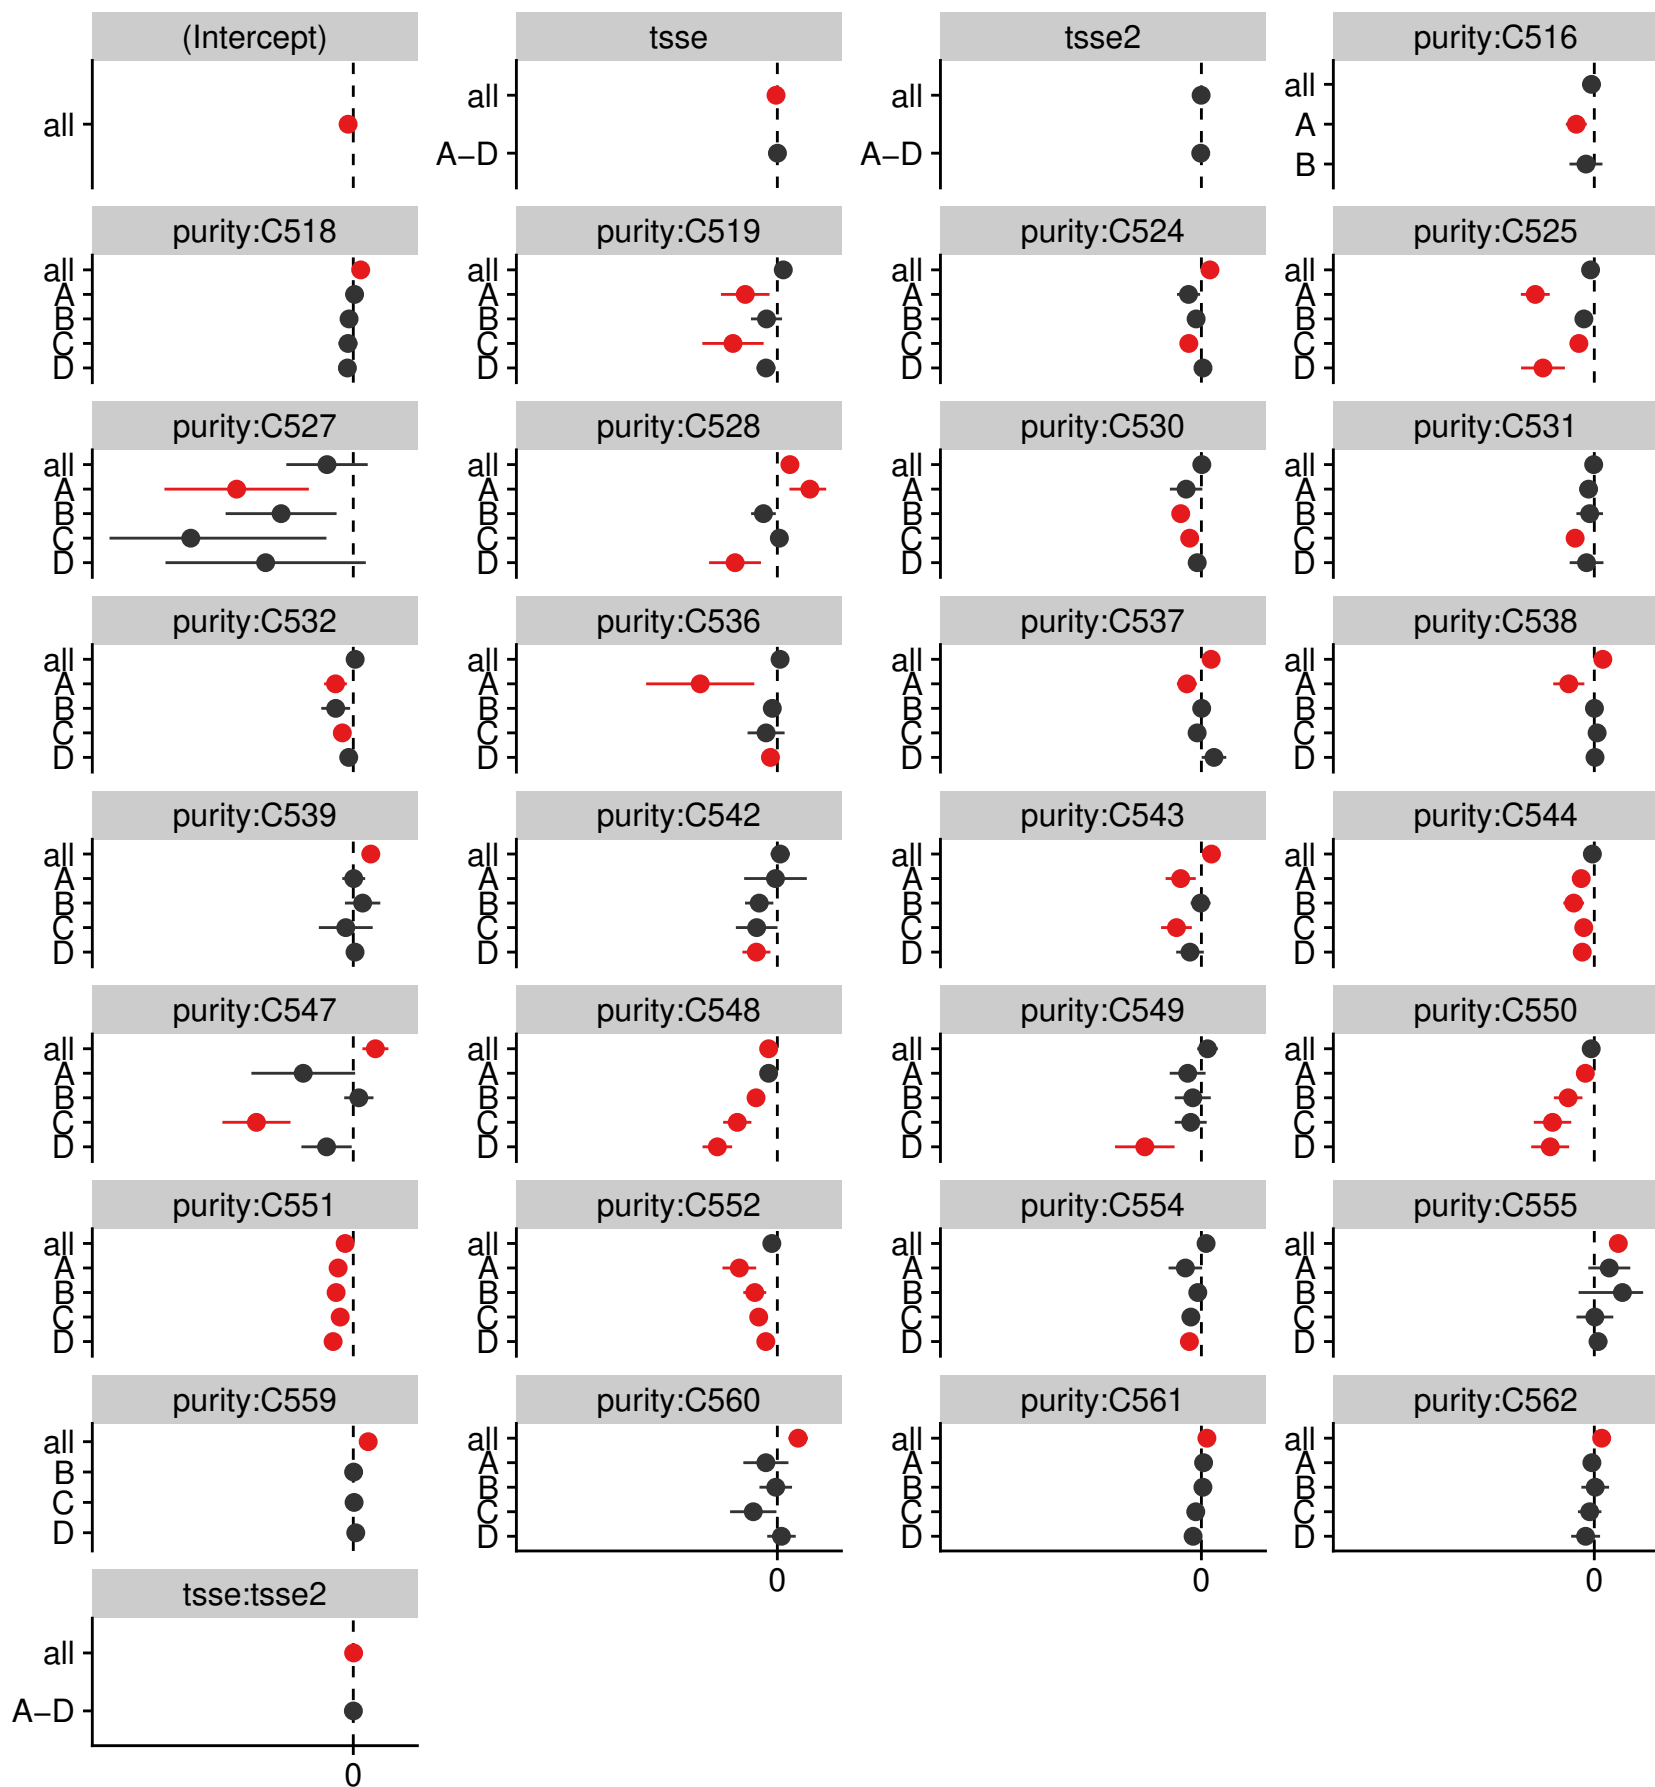

Coefficient

p\_c = < 2.22e-16, p\_sc = 0.0062291



# LMX1B\_uc\_dTSS\_nPEAK

+ 14/33 (1/116), - 4/33 (43/116)



Coefficient

p\_c = < 2.22e-16, p\_sc = 0.0062291

# NEUROD1\_uc\_cTSS\_oPEAK

+ 8/33 (20/116), - 10/33 (10/116)

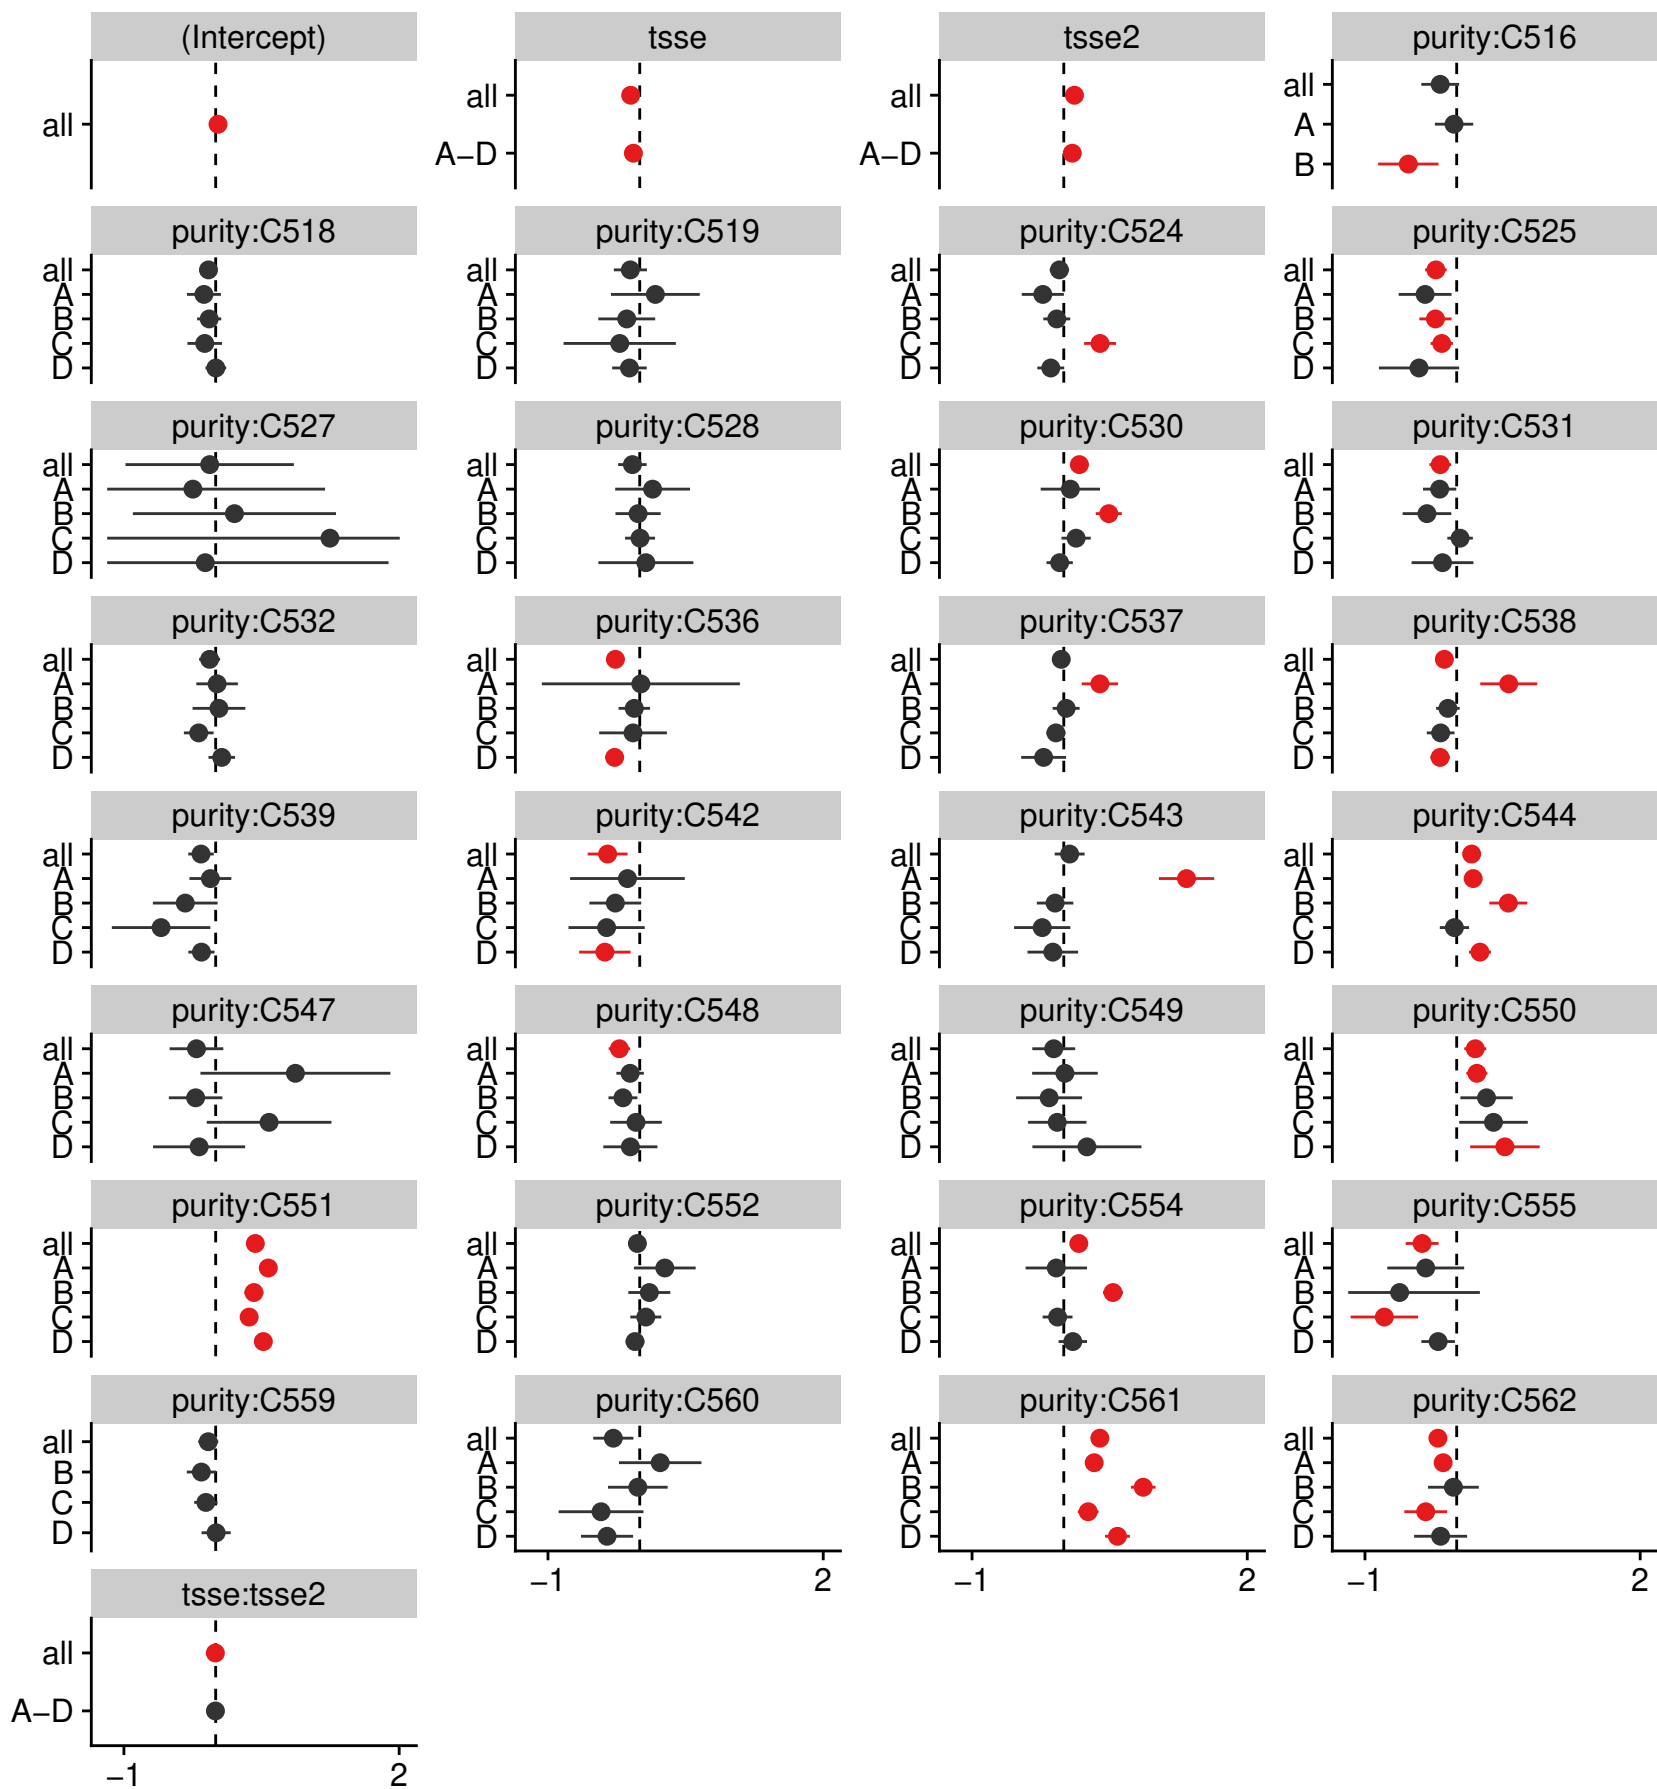

p\_c = < 2.22e-16, p\_sc = < 2.22e-16

$+ 8/33 \text{ (22/116)}, - 9/33 \text{ (14/116)}$ 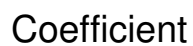

$p_c = < 2.22e-16$ ,  $p_{sc} = < 2.22e-16$

$+ 14/33 (1/116), - 5/33 (33/116)$ 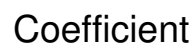

$p_c = < 2.22e-16$ ,  $p_{sc} = 0.00092284$

# OTP\_uc\_dTSS\_nPEAK

+ 14/33 (2/116), - 3/33 (34/116)

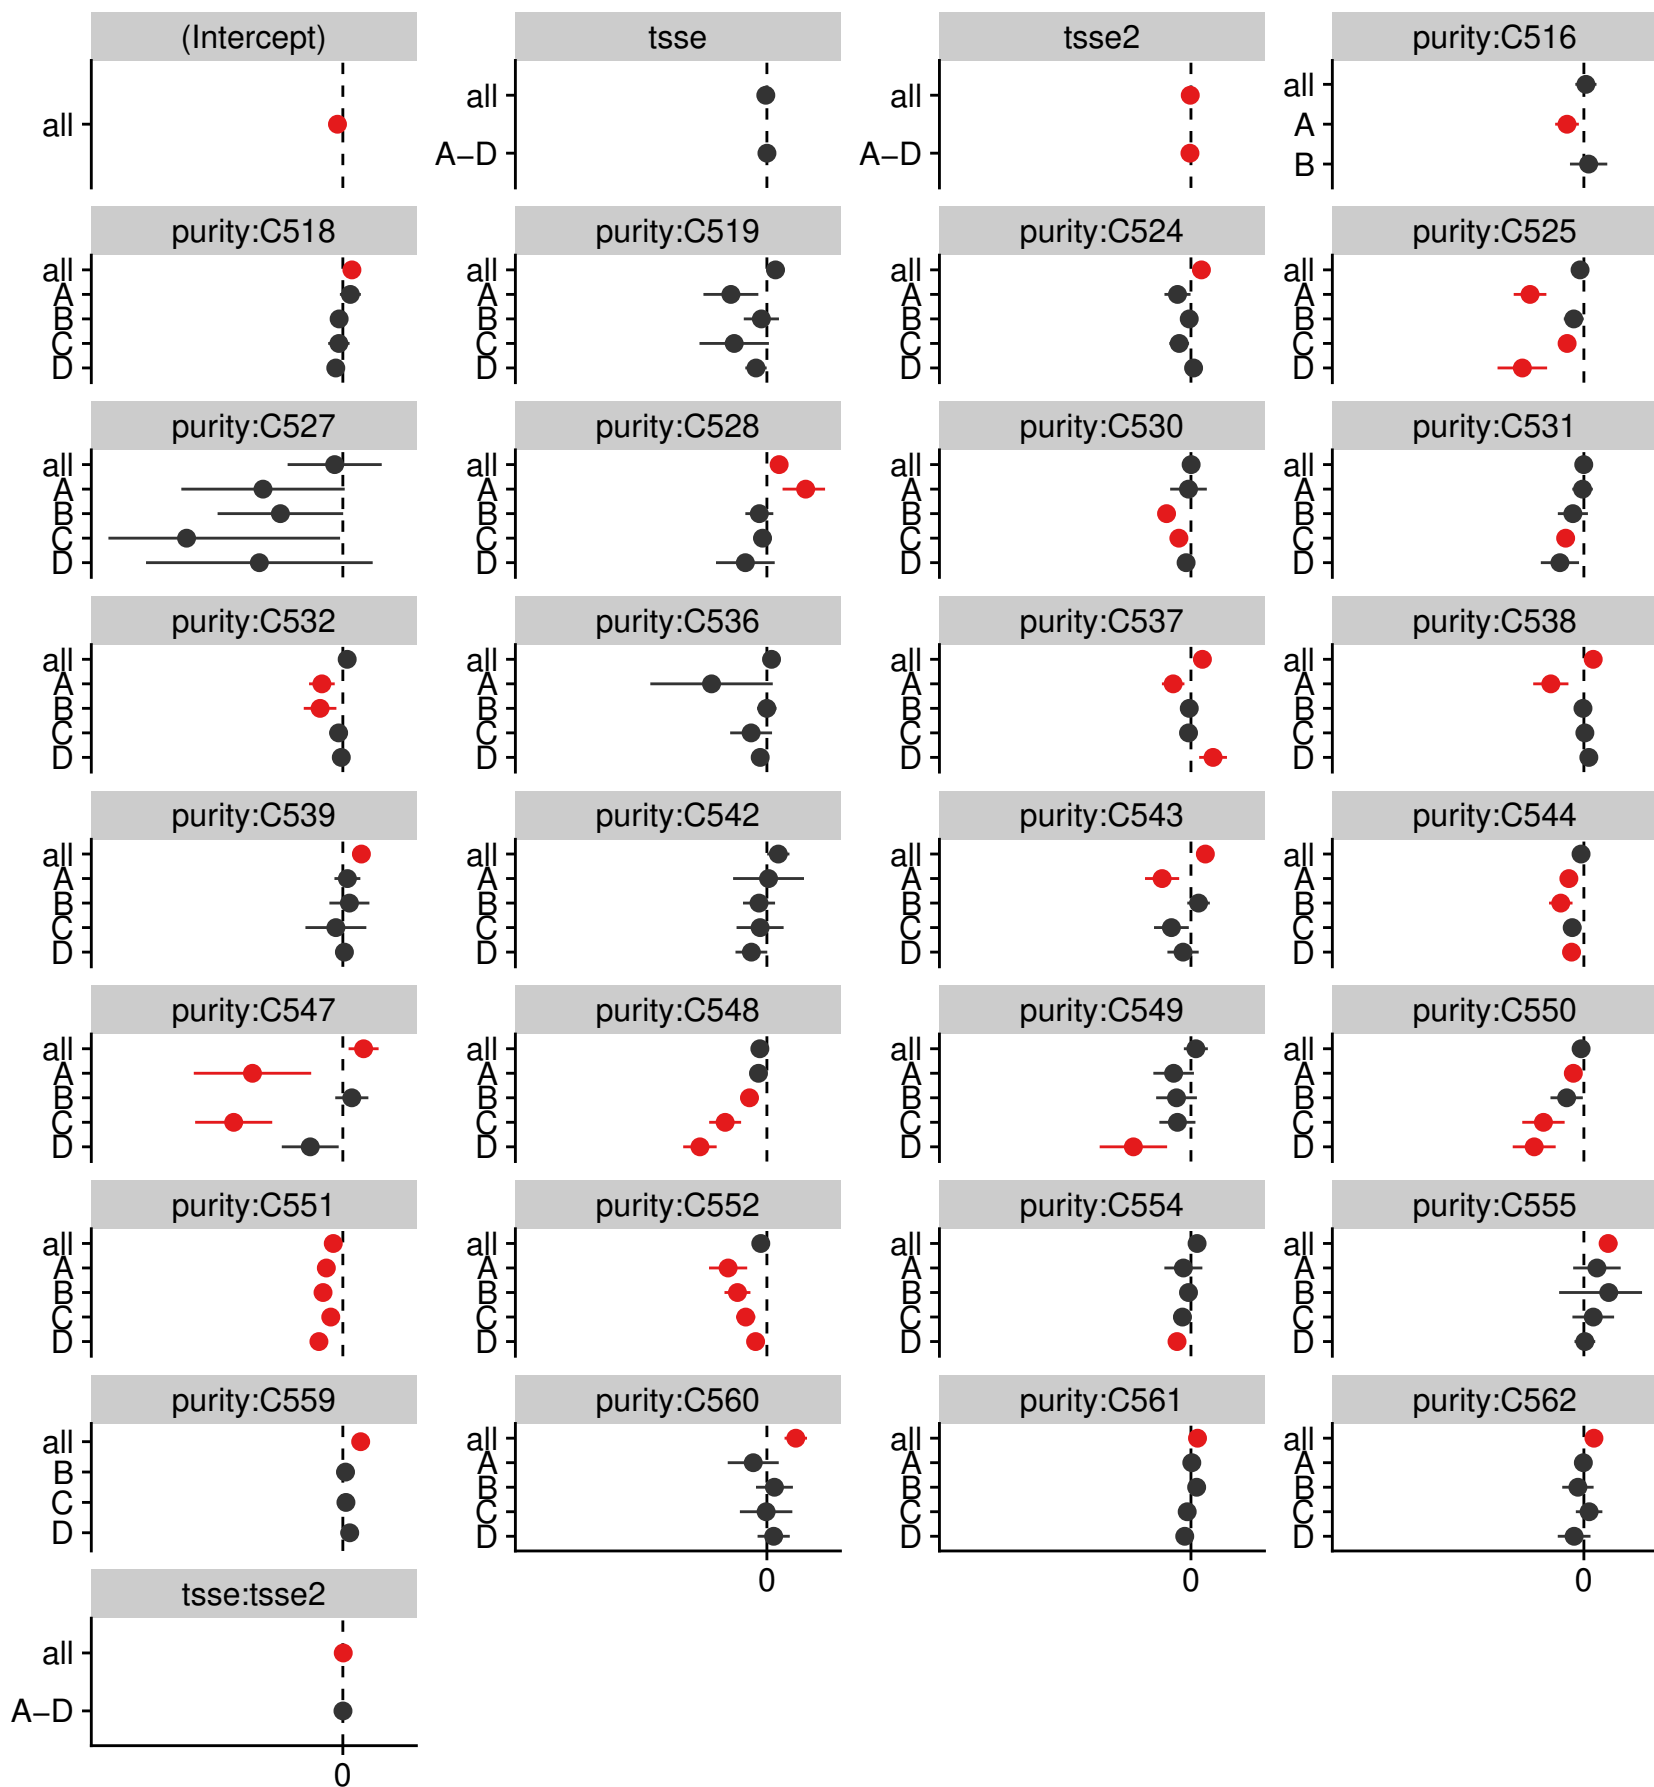

Coefficient

p\_c = < 2.22e-16, p\_sc = 4.9549e-06

# PBX3\_uc\_pTSS\_oPEAK

+ 8/33 (58/116), - 6/33 (8/116)

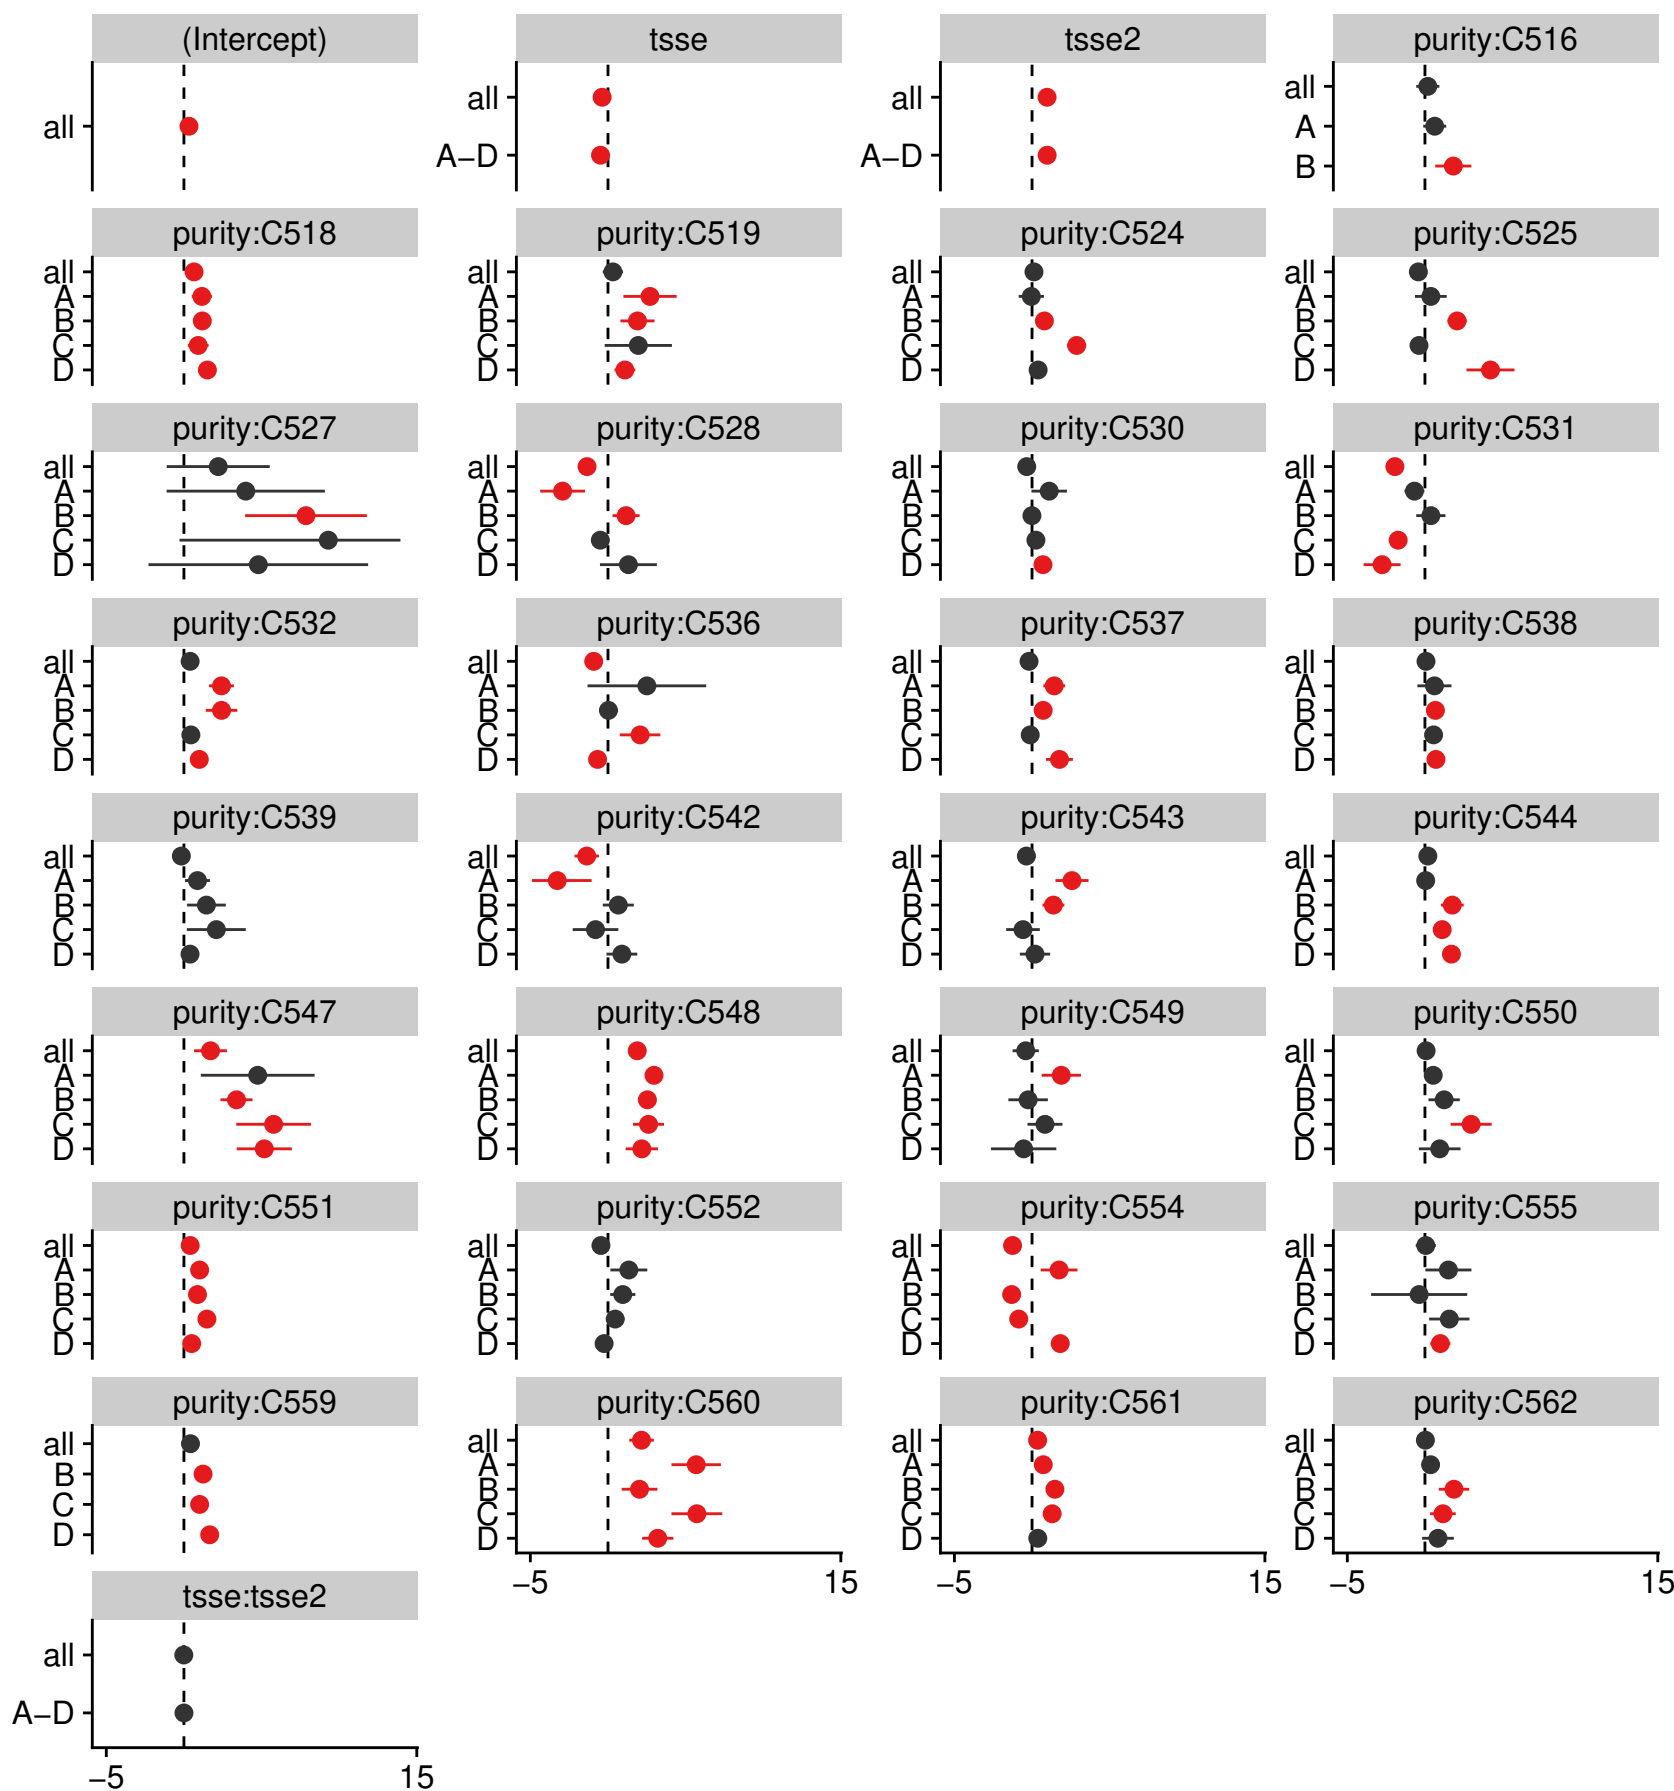

p\_c = < 2.22e-16, p\_sc = < 2.22e-16

# PDX1\_uc\_dTSS\_nPEAK

+ 15/33 (0/116), - 2/33 (36/116)

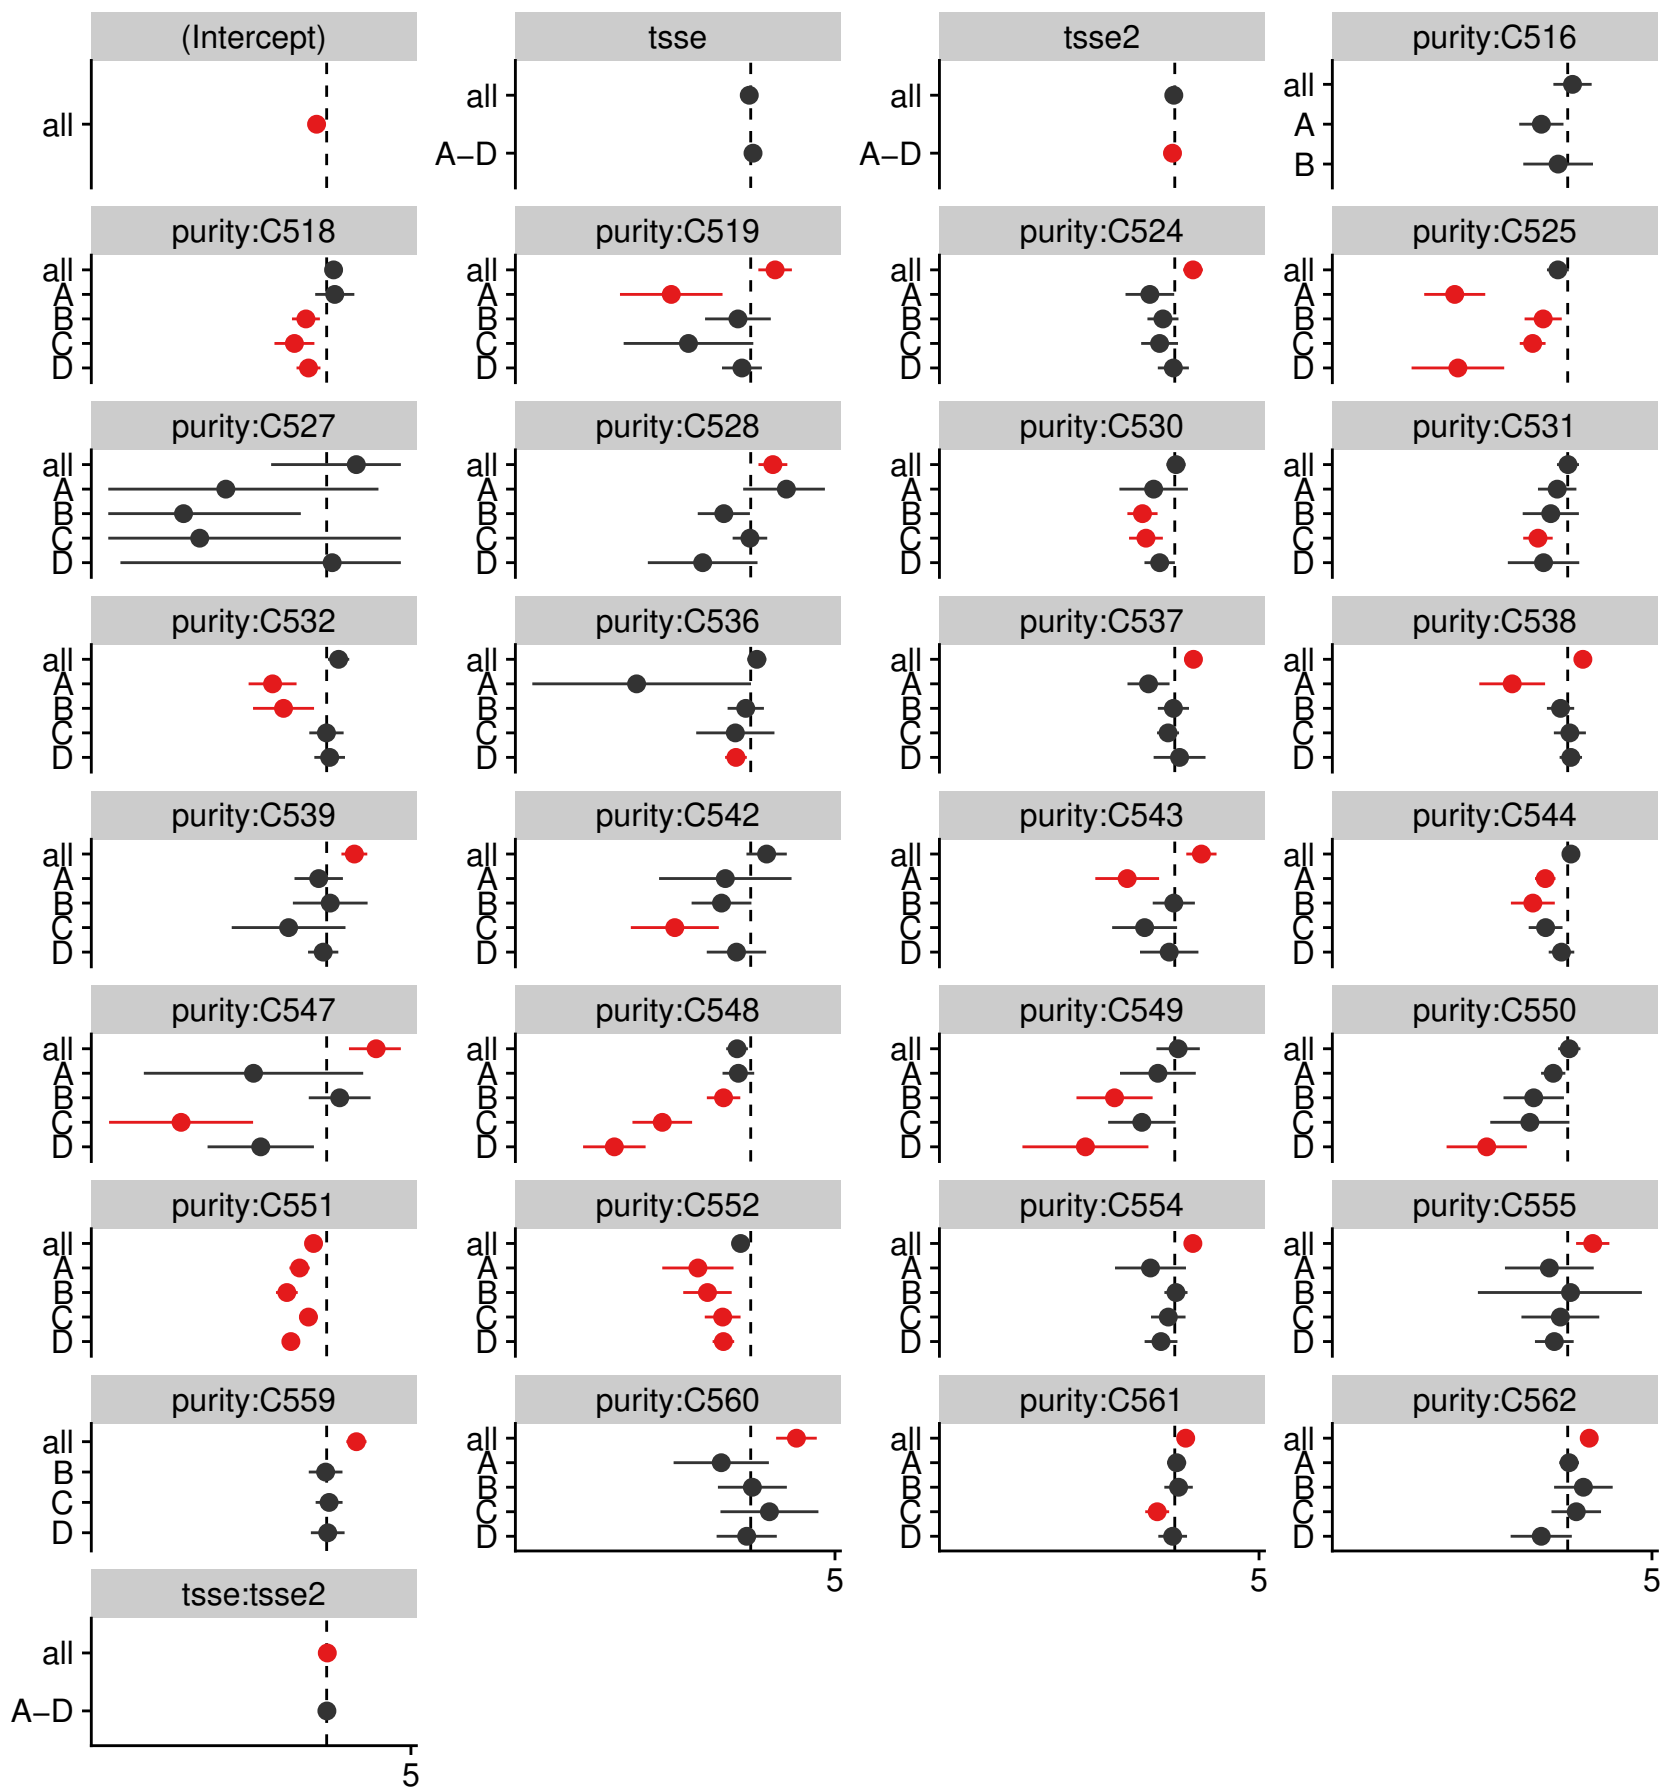

Coefficient

$p_c = < 2.22e-16$ ,  $p_{sc} = 0.074489$

# PDX1\_uc\_dTSS\_oPEAK

+ 12/33 (2/116), - 2/33 (26/116)

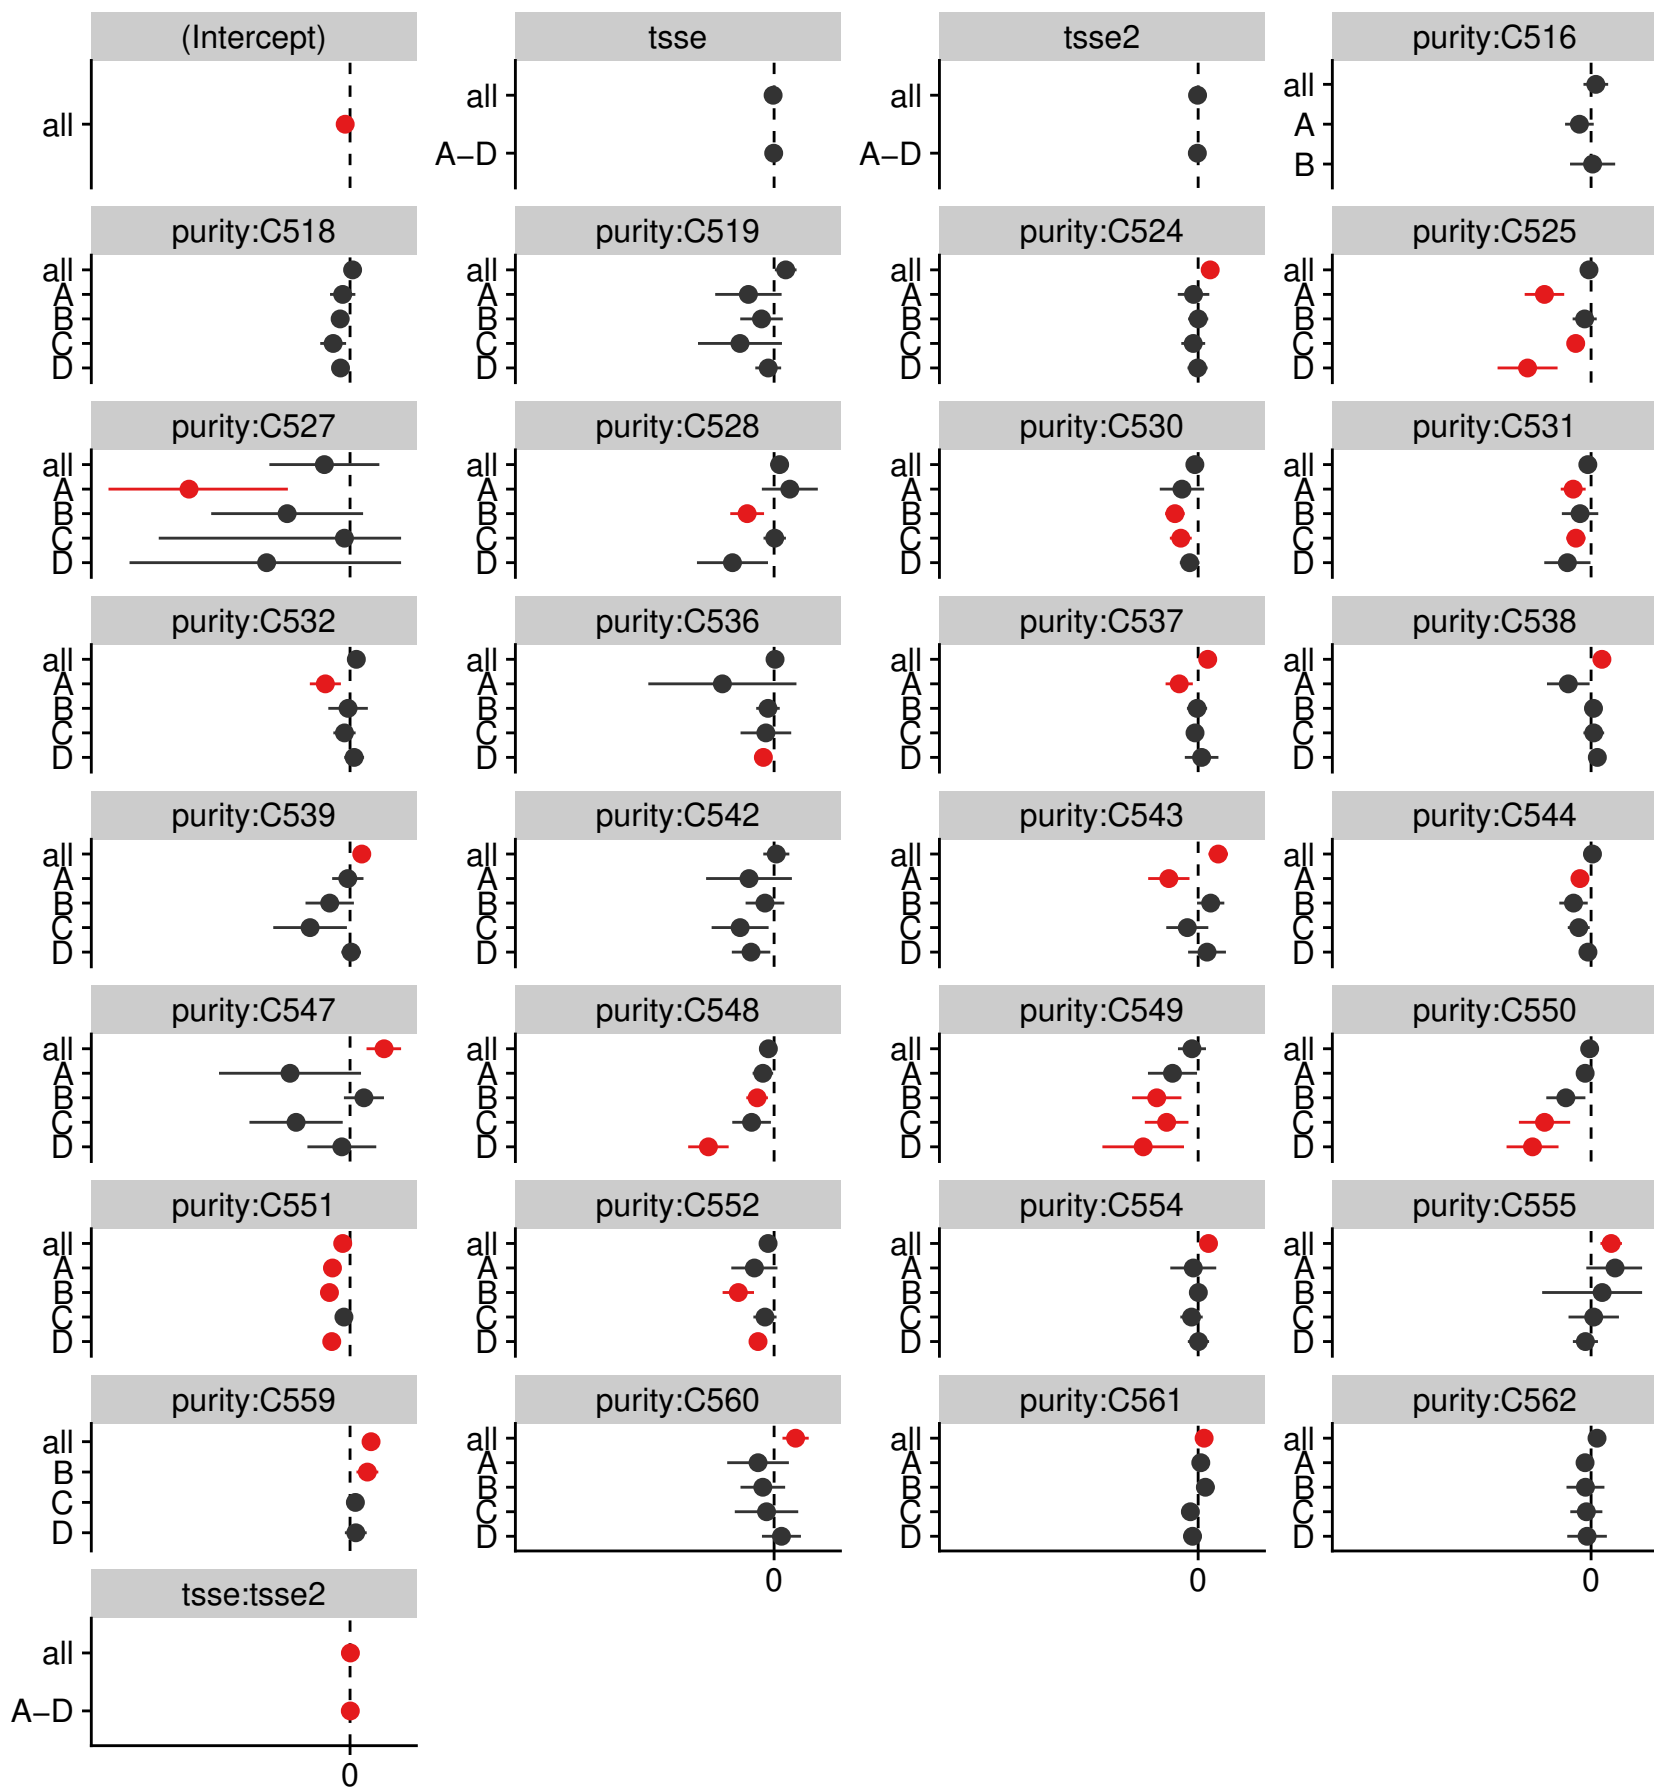

Coefficient

p\_c = < 2.22e-16, p\_sc = 0.13344



# PRDM1\_uc\_cTSS\_oPEAK

+ 2/33 (5/116), - 16/33 (27/116)

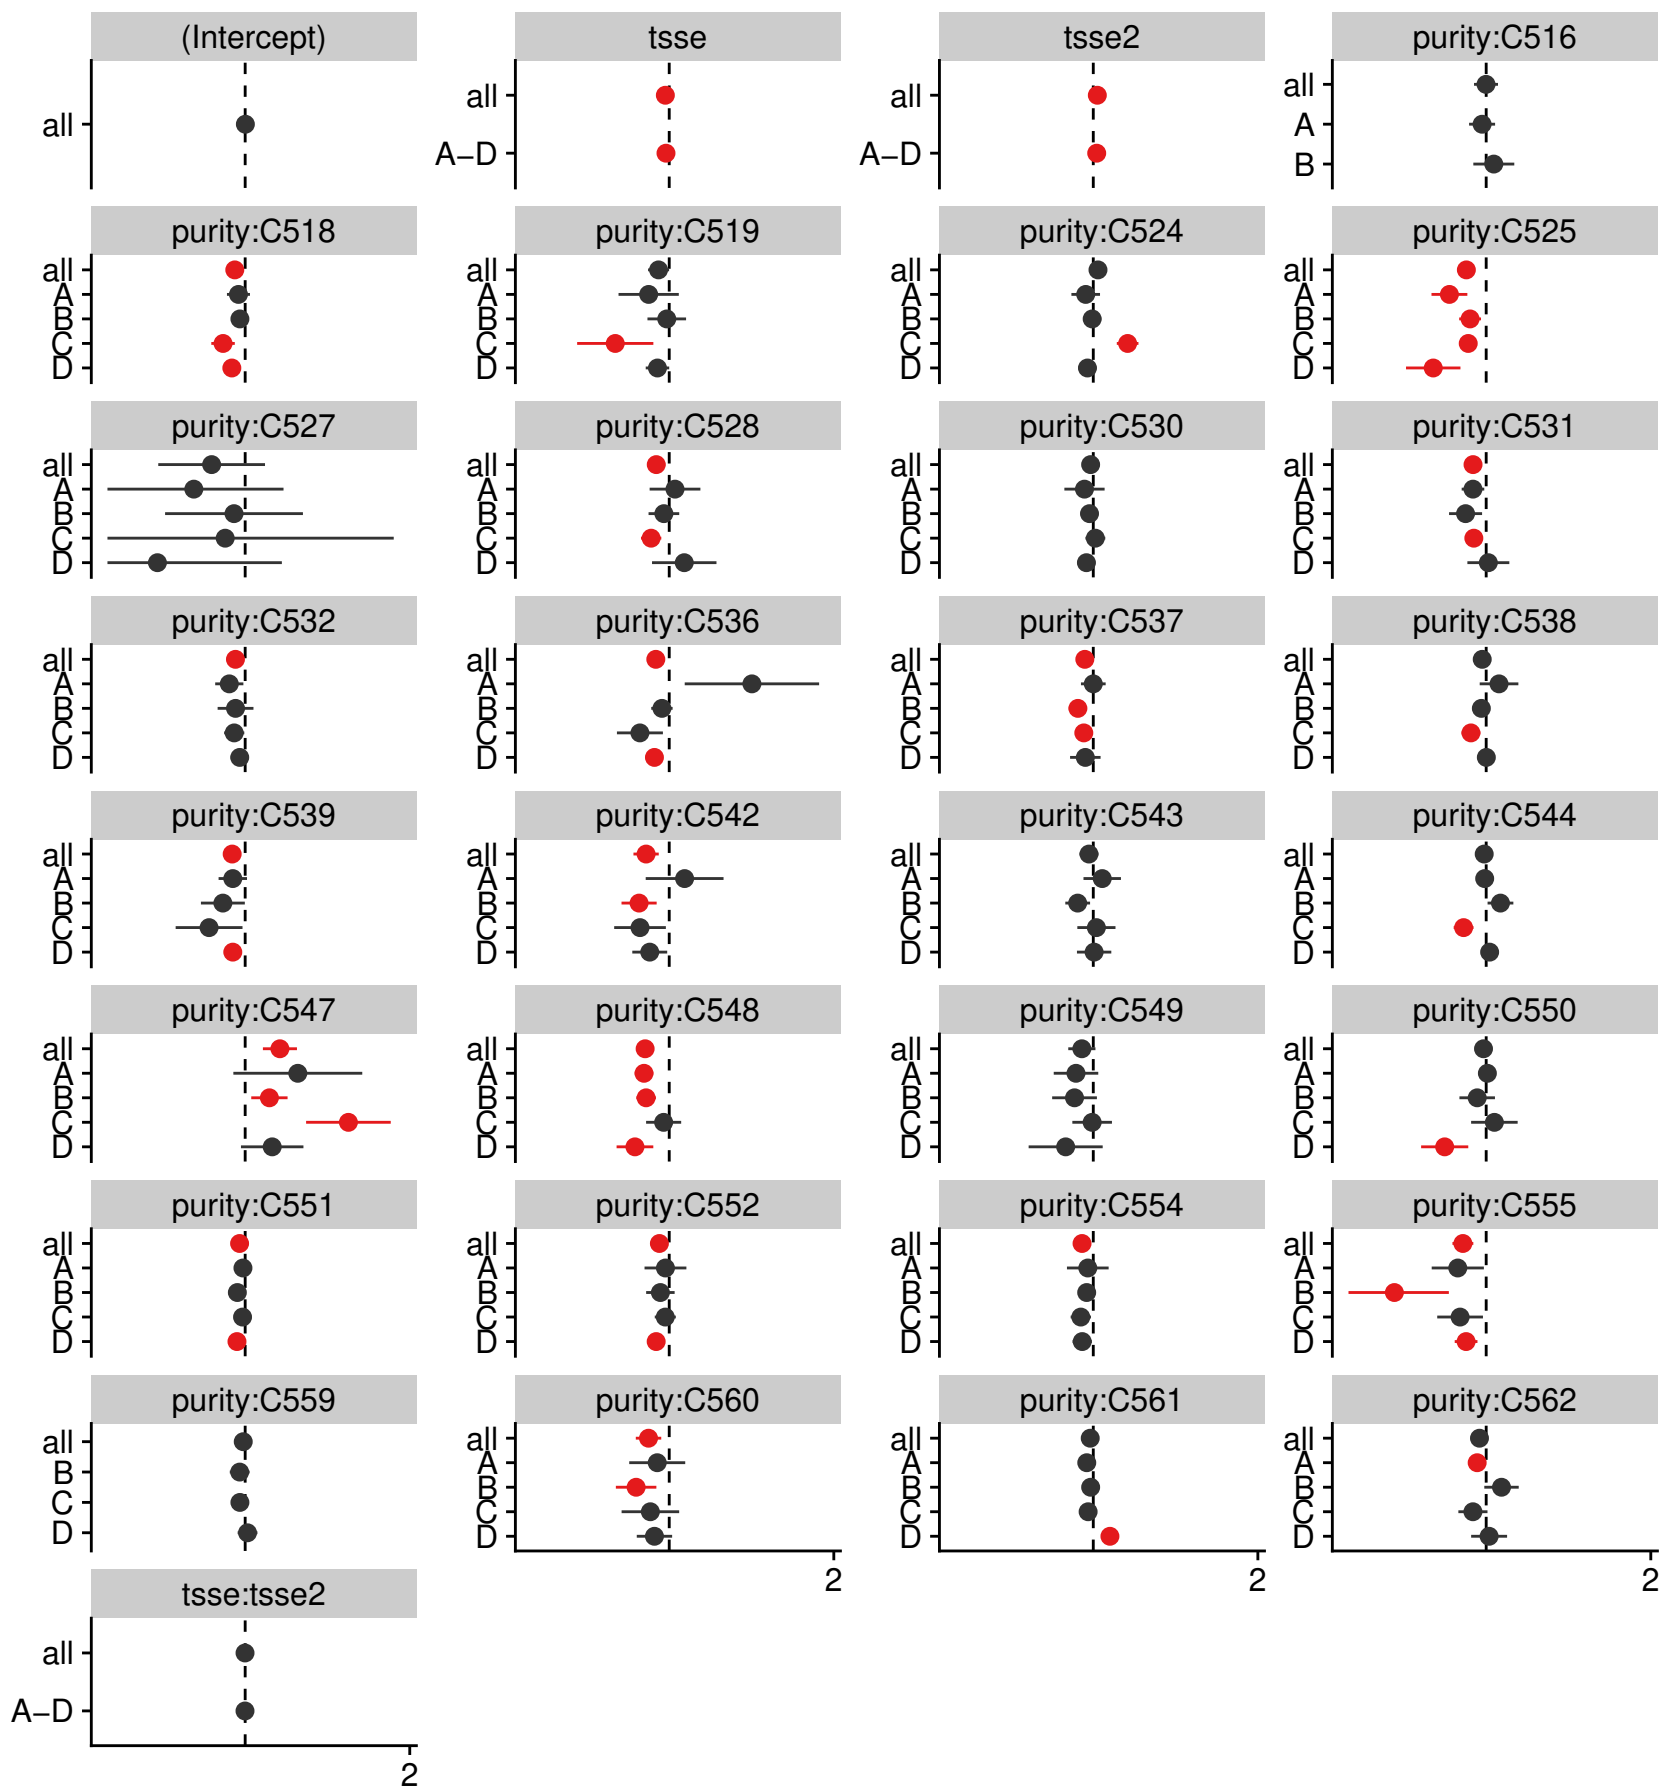

Coefficient

p\_c = < 2.22e-16, p\_sc = 2.8093e-12

# PRRX1\_uc\_dTSS\_nPEAK

+ 14/33 (1/116), - 4/33 (43/116)

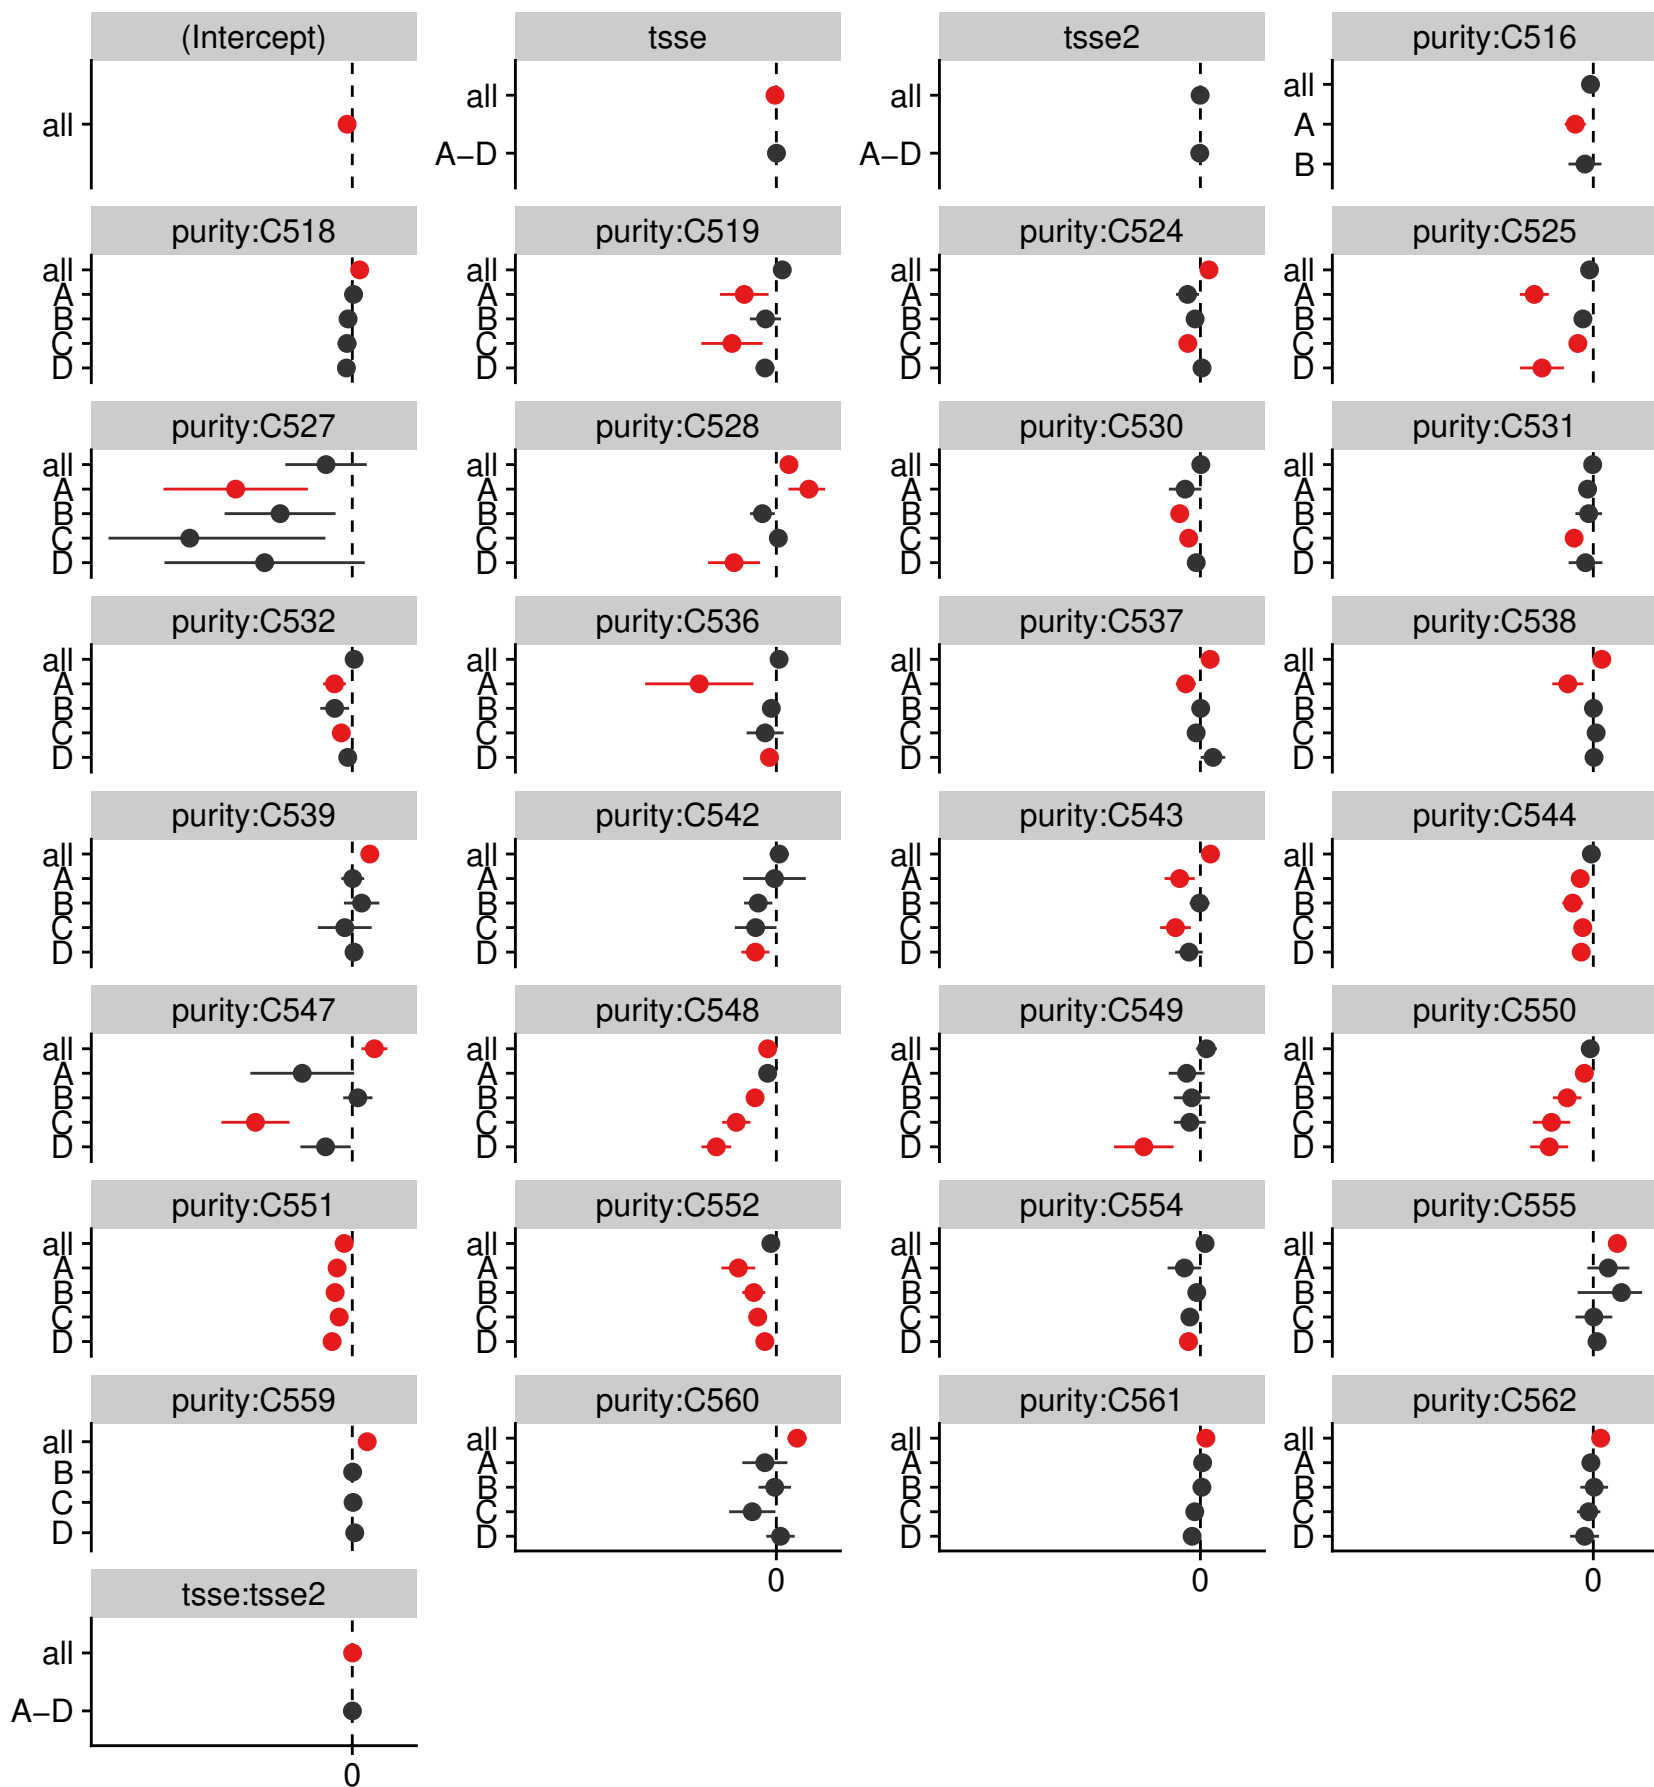

Coefficient

p\_c = < 2.22e-16, p\_sc = 0.0062291

# PURA\_uc\_dTSS\_oPEAK

+ 14/33 (57/116), - 1/33 (0/116)

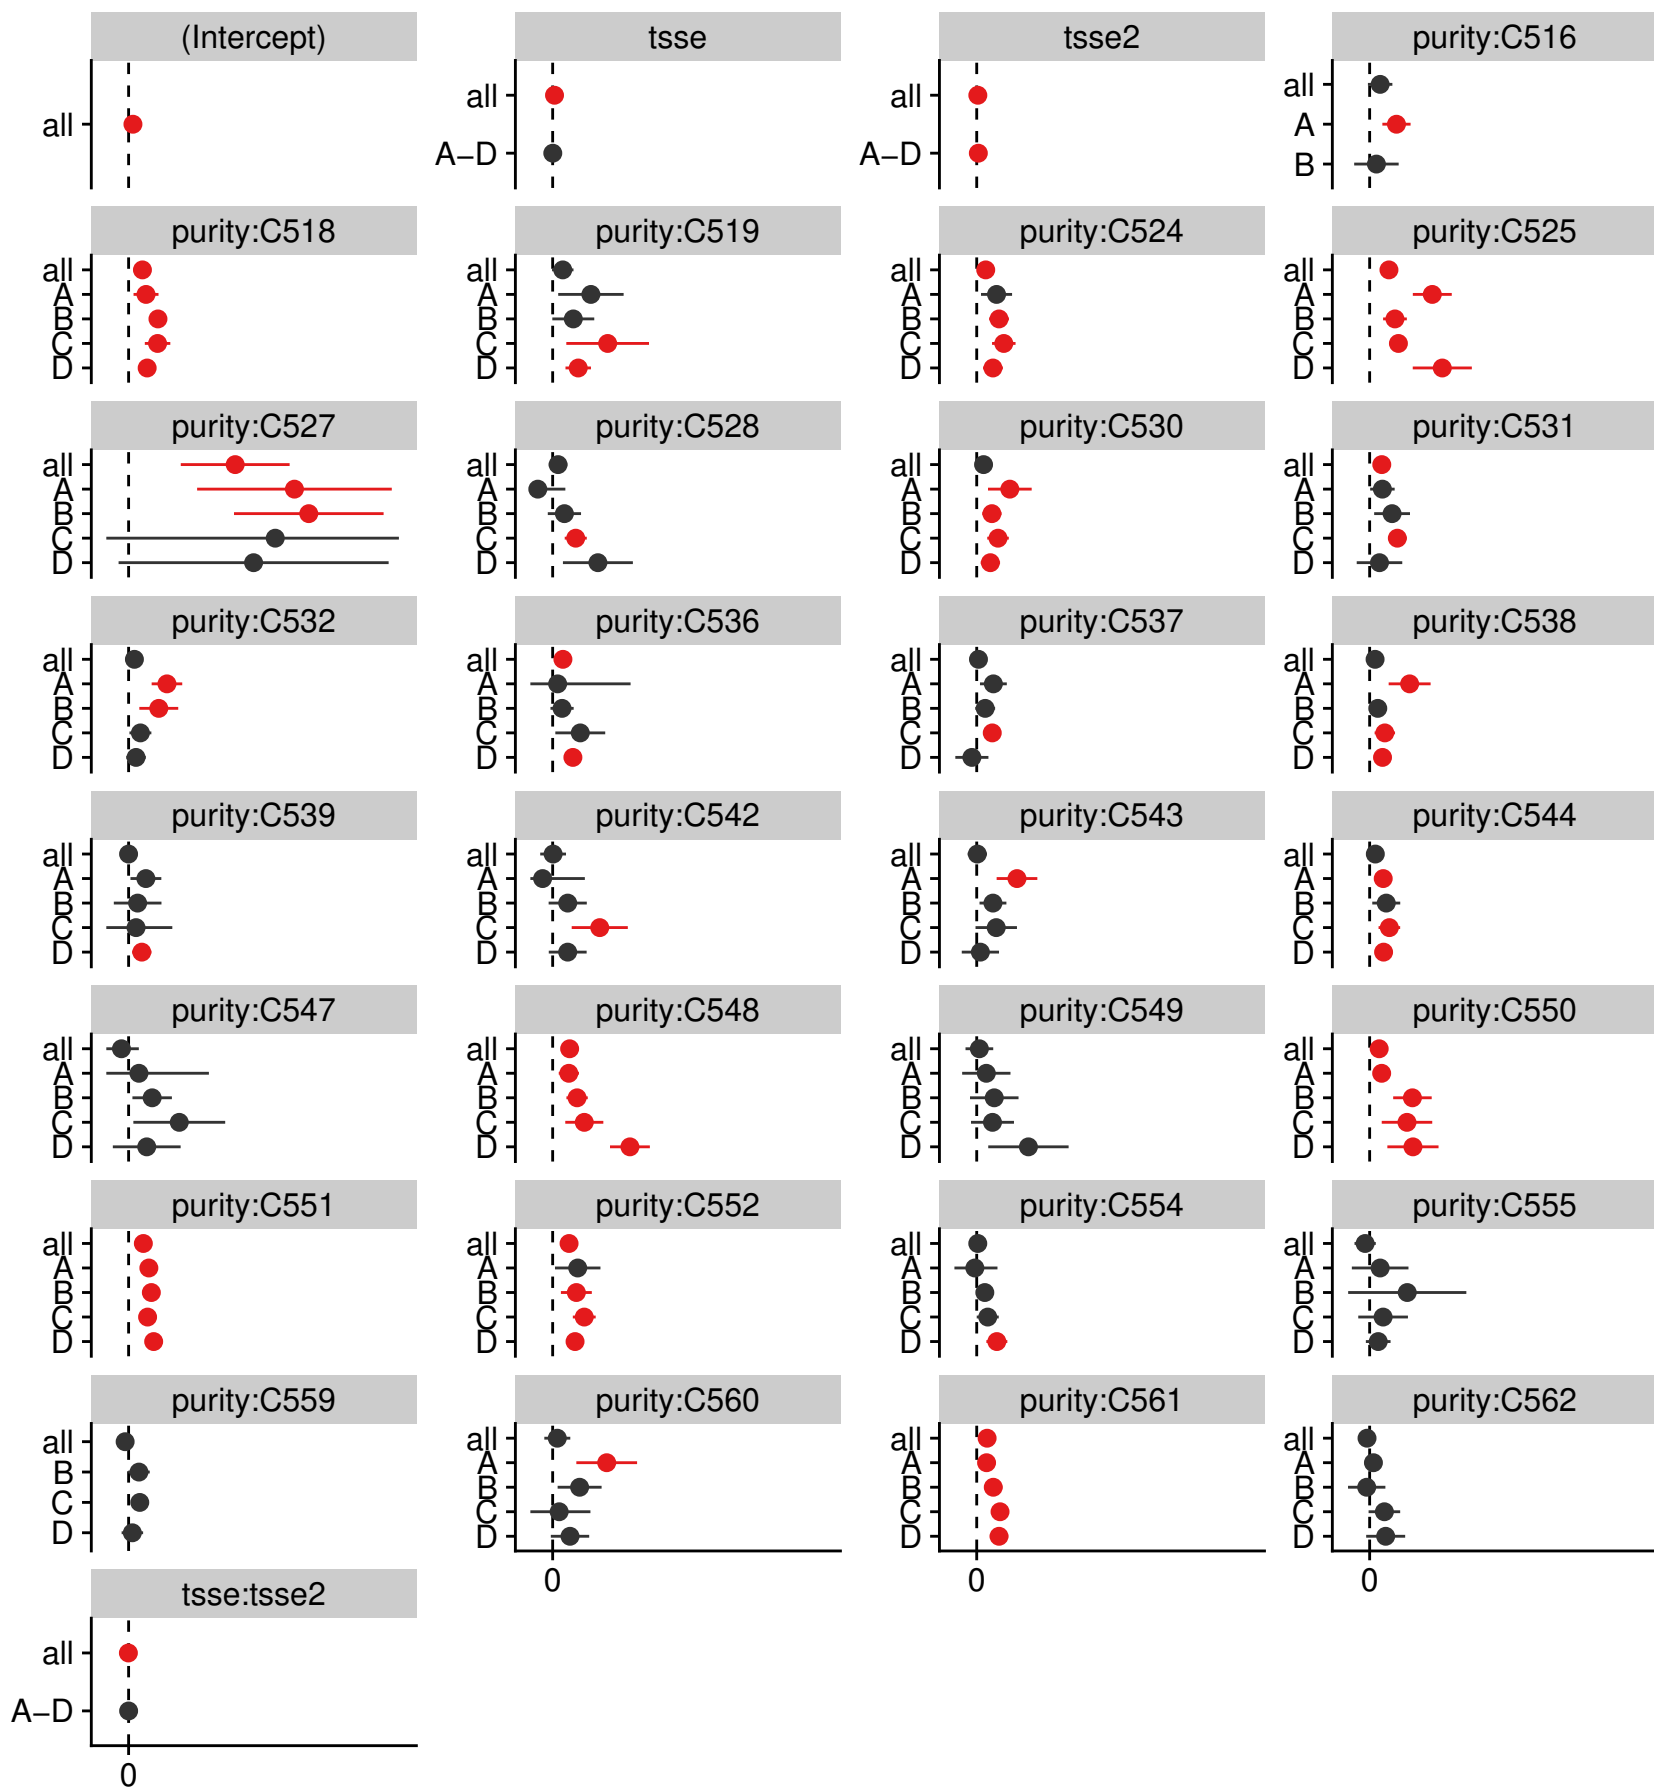

p\_c = < 2.22e-16, p\_sc = 0.046924

# SHOX\_uc\_dTSS\_nPEAK

+ 14/33 (1/116), - 4/33 (43/116)



Coefficient

$p_c = < 2.22e-16$ ,  $p_{sc} = 0.0062291$

# SMARCC2\_uc\_pTSS\_oPEAK

+ 6/33 (20/116), - 10/33 (14/116)

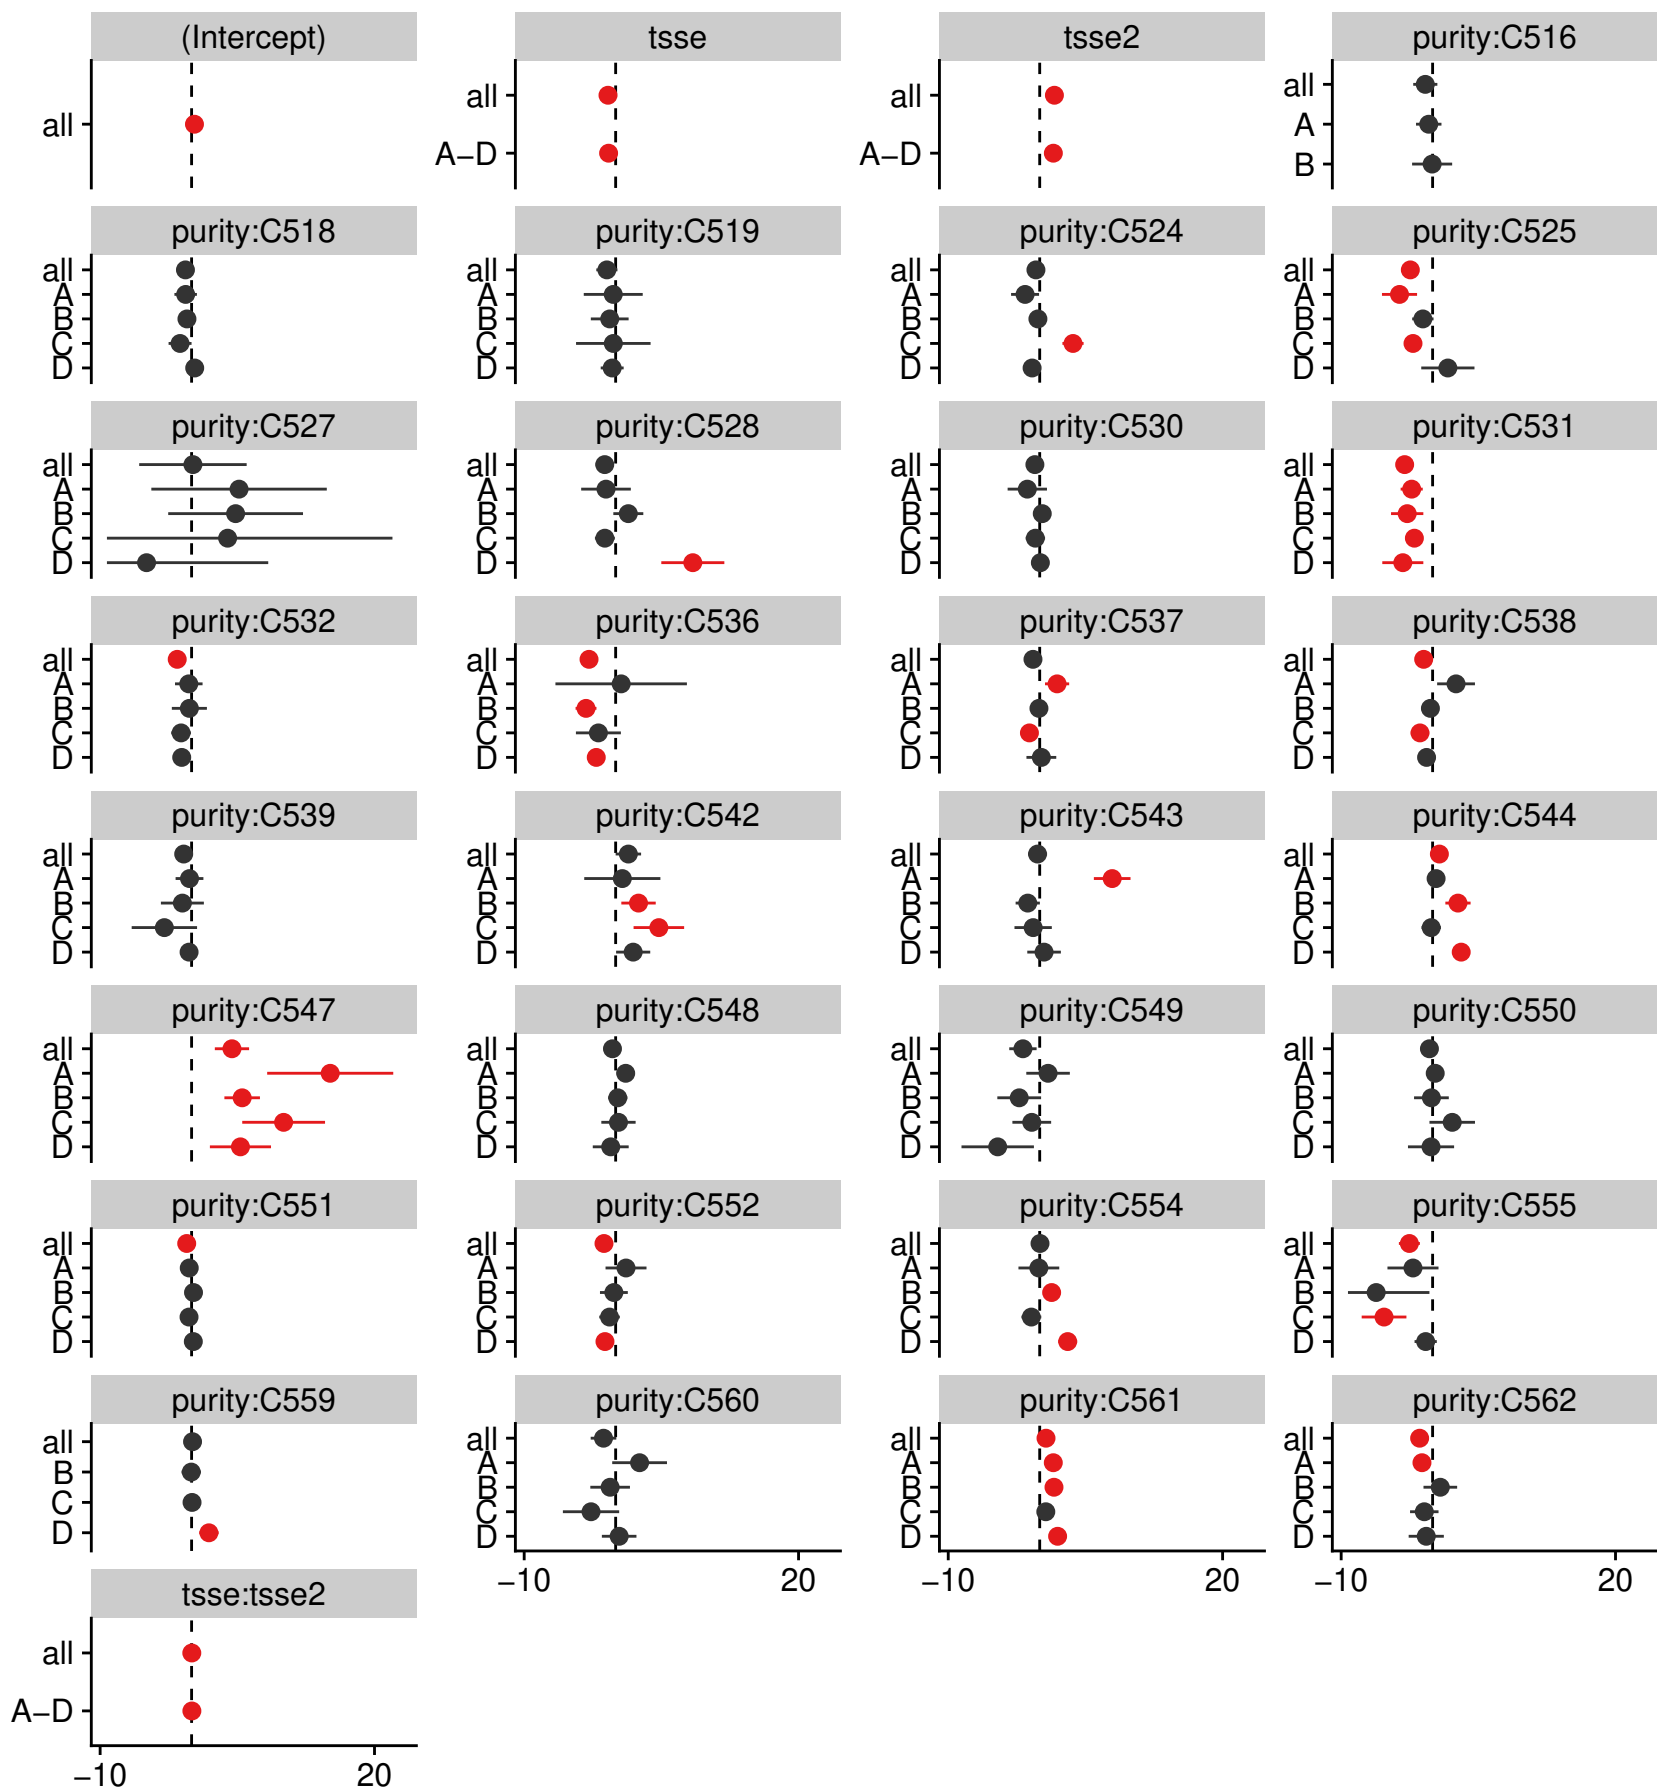

p\_c = < 2.22e-16, p\_sc = < 2.22e-16

# SNAI2\_uc\_cTSS\_nPEAK

+ 5/33 (48/116), - 12/33 (2/116)

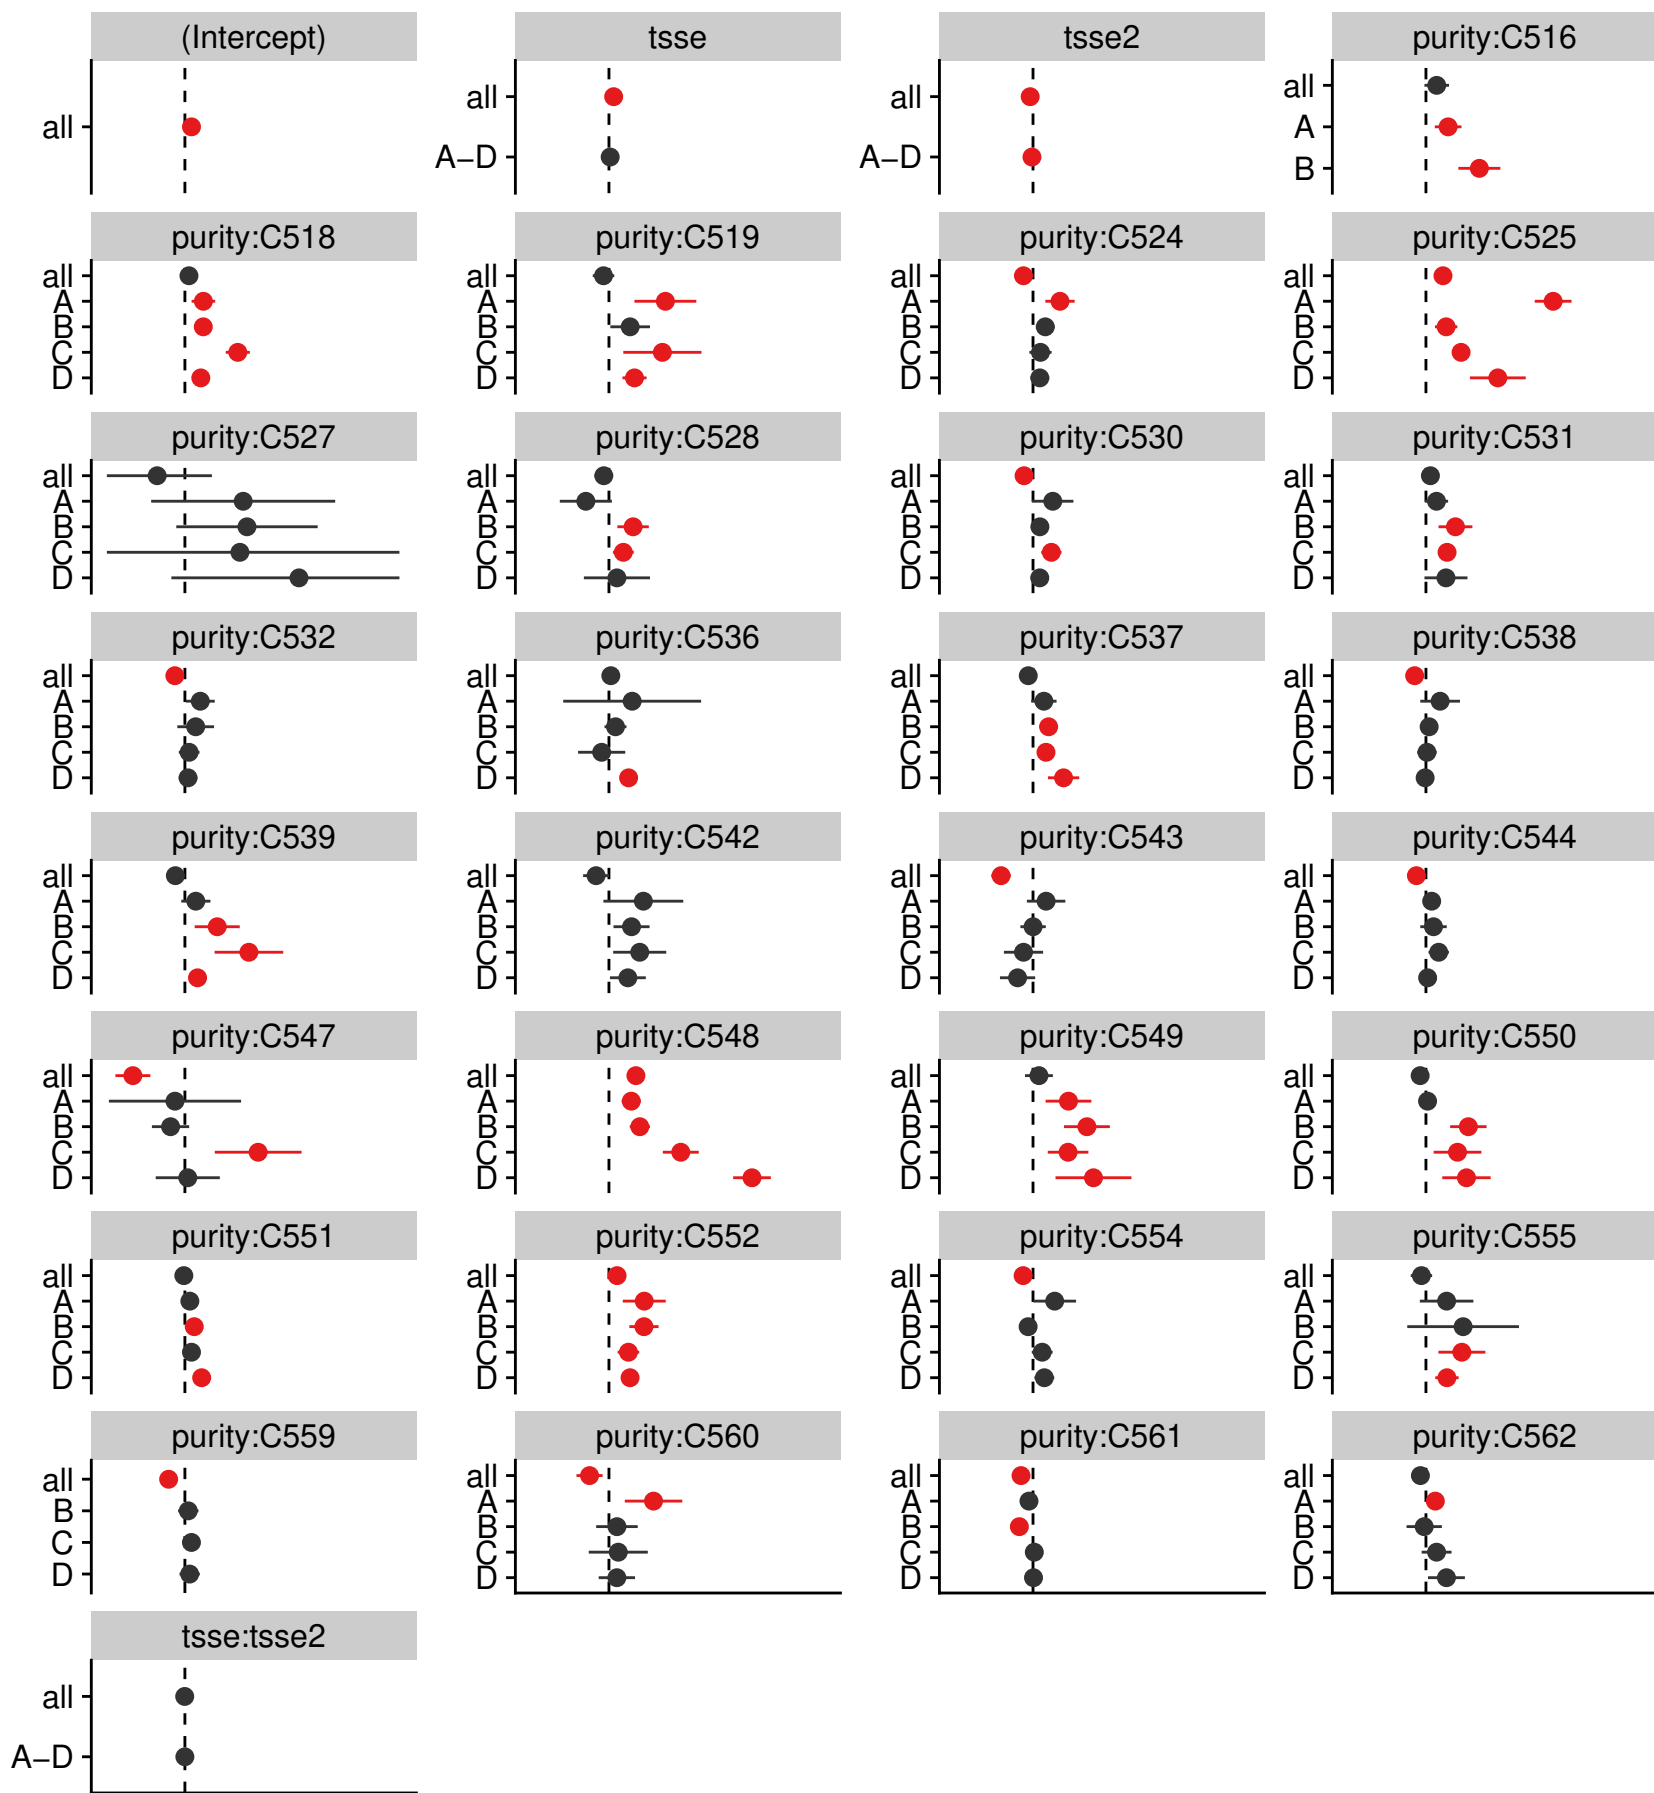

Coefficient

p\_c = < 2.22e-16, p\_sc = 3.045e-12

# SNAI2\_uc\_dTSS\_oPEAK

+ 6/33 (40/116), - 8/33 (2/116)

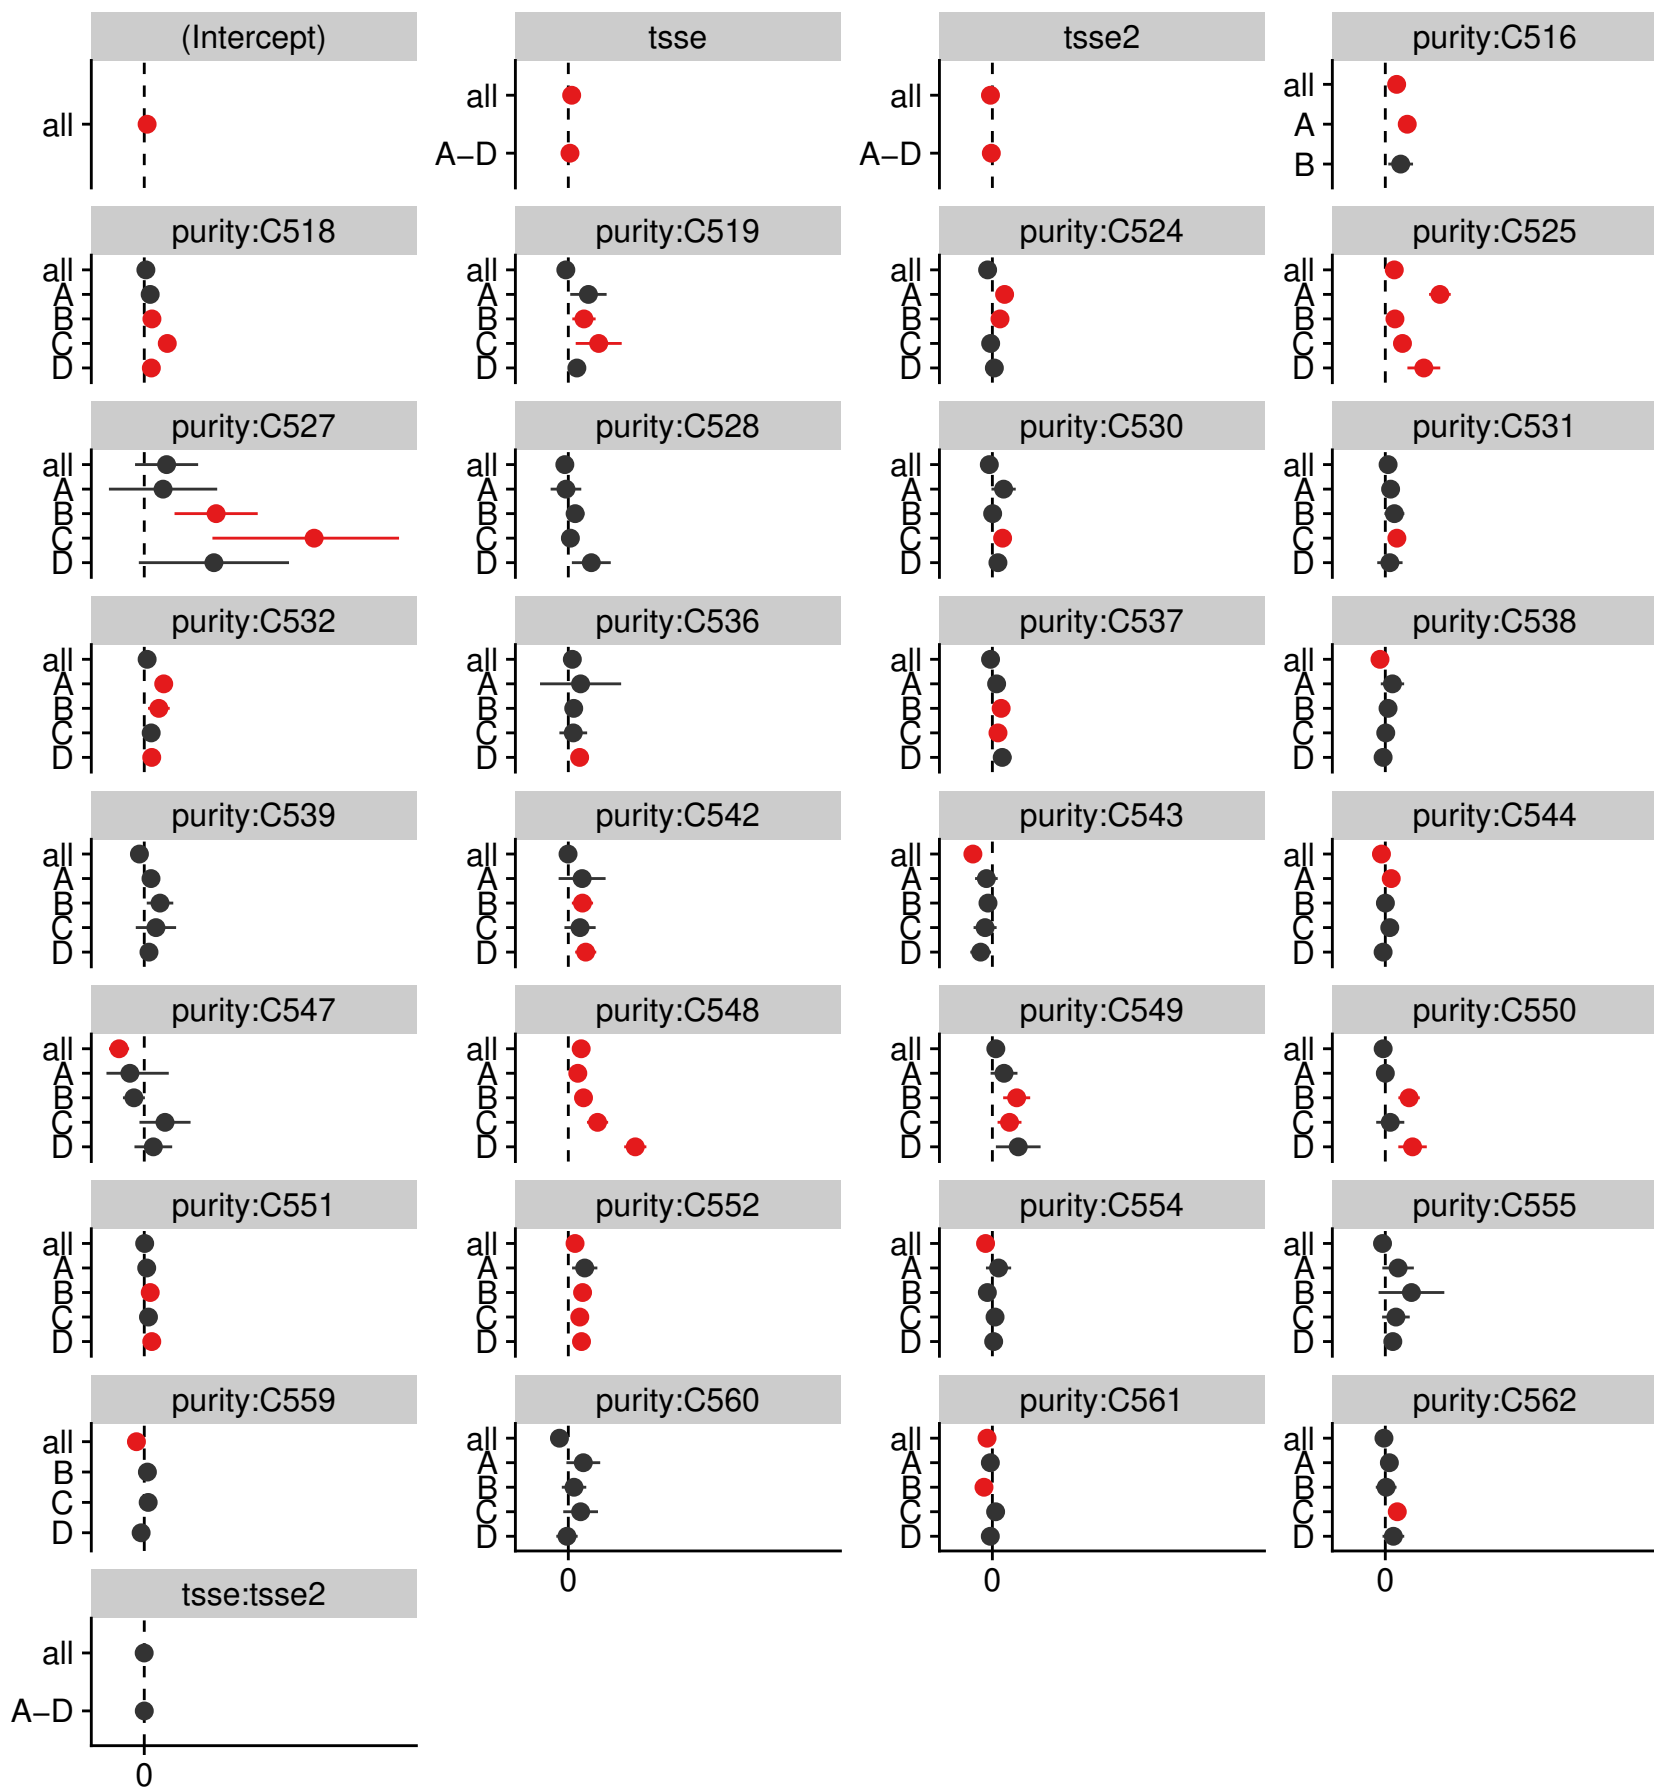

Coefficient

p\_c = < 2.22e-16, p\_sc = 4.9881e-08

# SOX13\_uc\_cTSS\_nPEAK

+ 12/33 (0/116), - 5/33 (45/116)

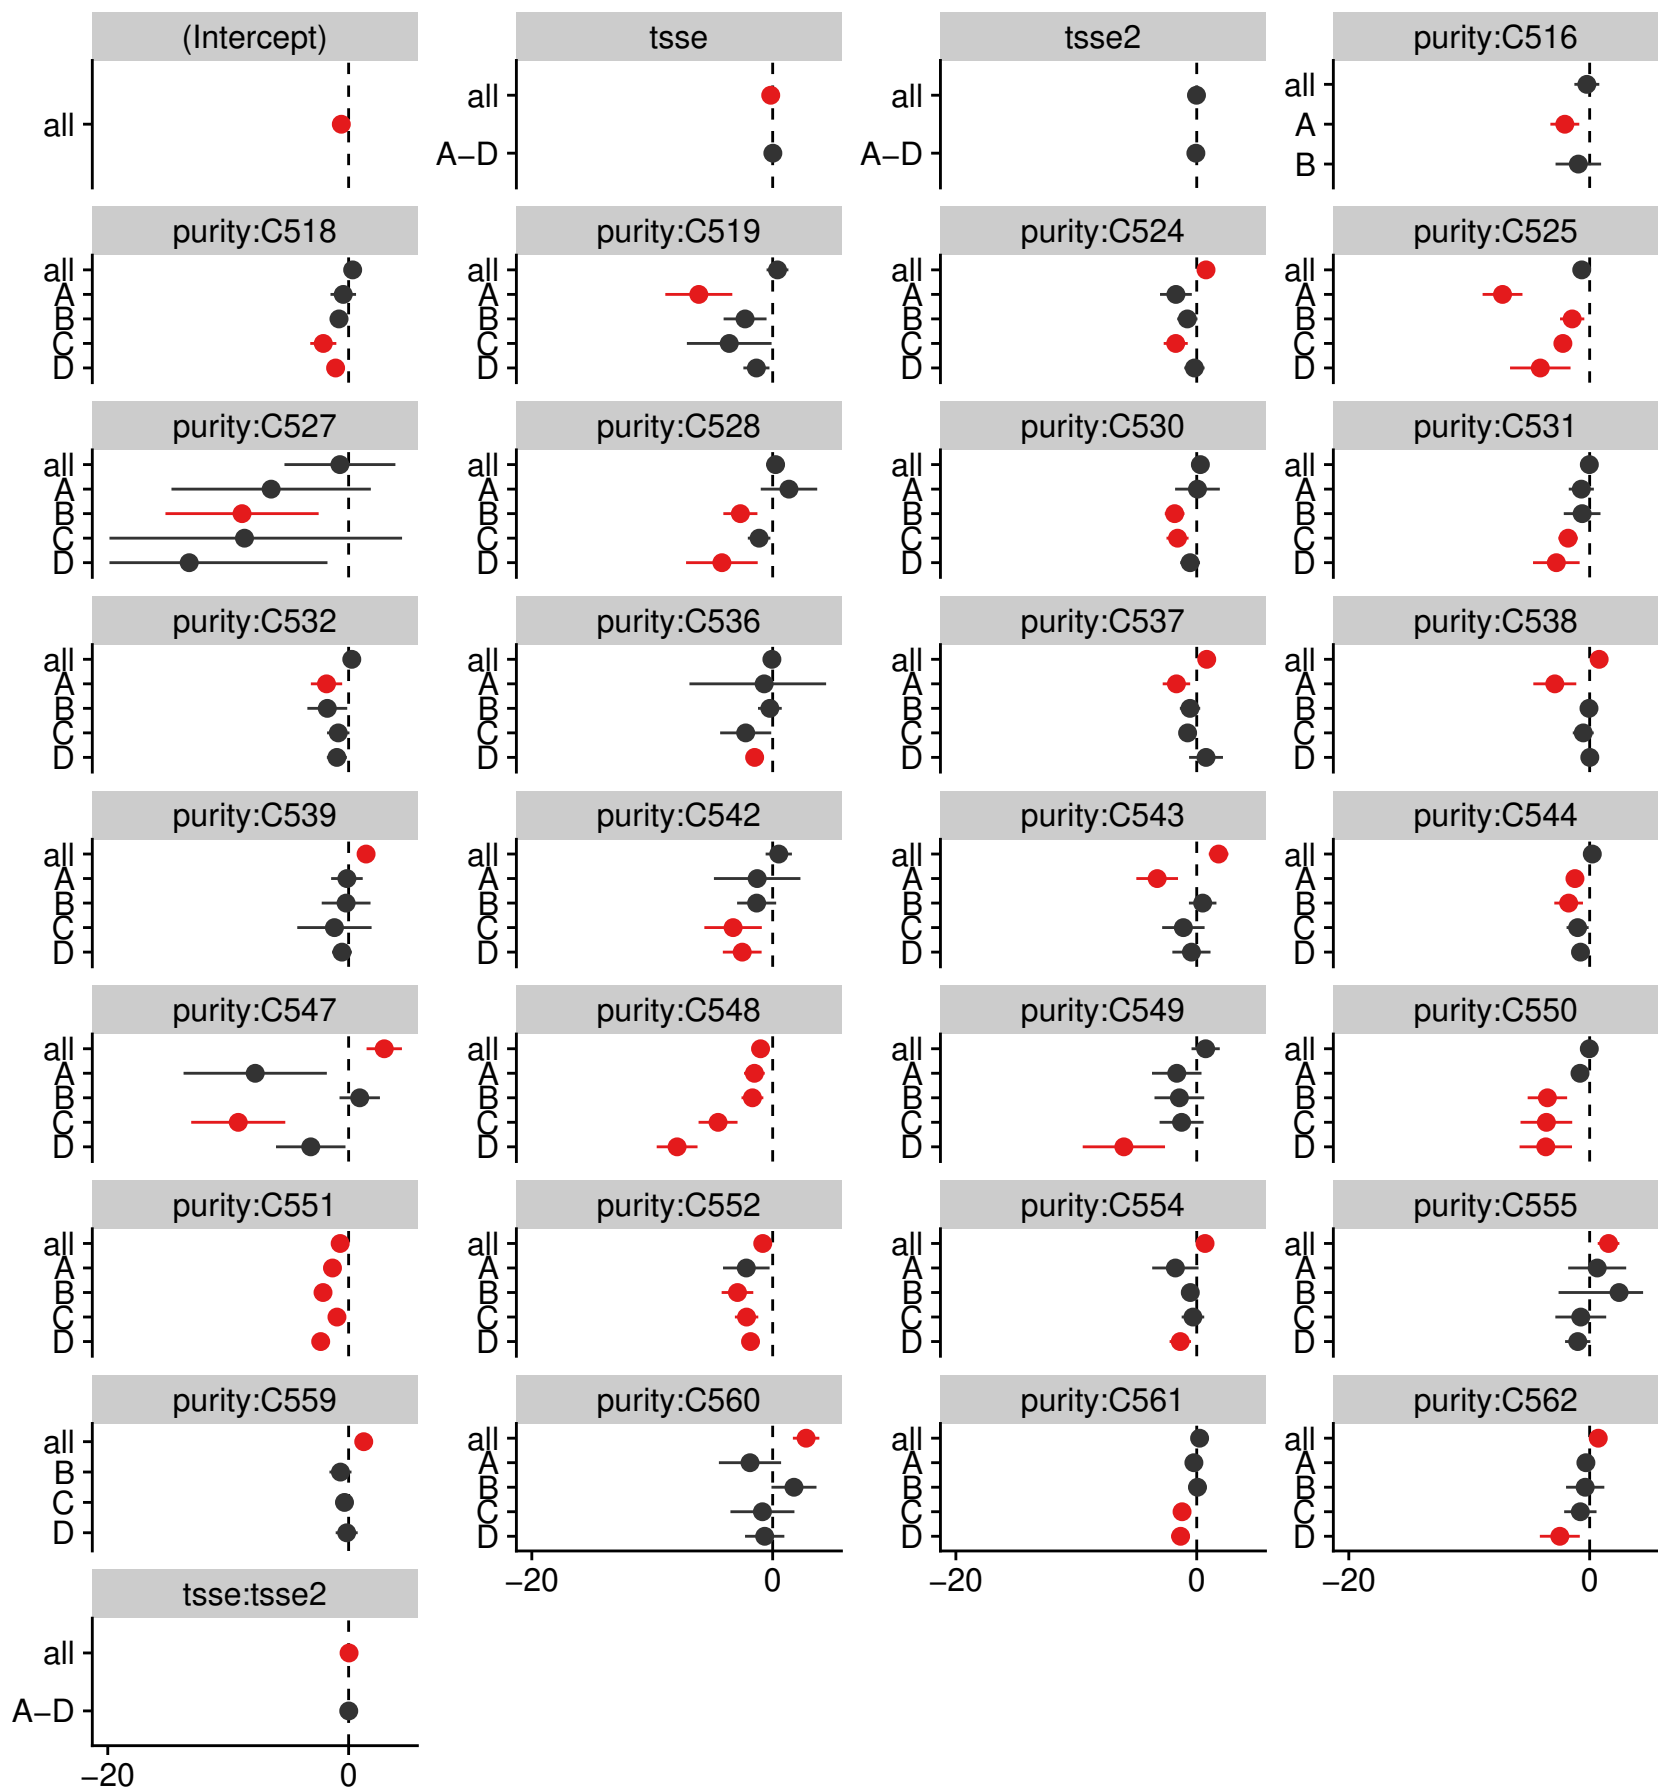

Coefficient

p\_c = < 2.22e-16, p\_sc = 0.13298



# SOX1\_uc\_dTSS\_nPEAK

+ 12/33 (0/116), - 4/33 (42/116)

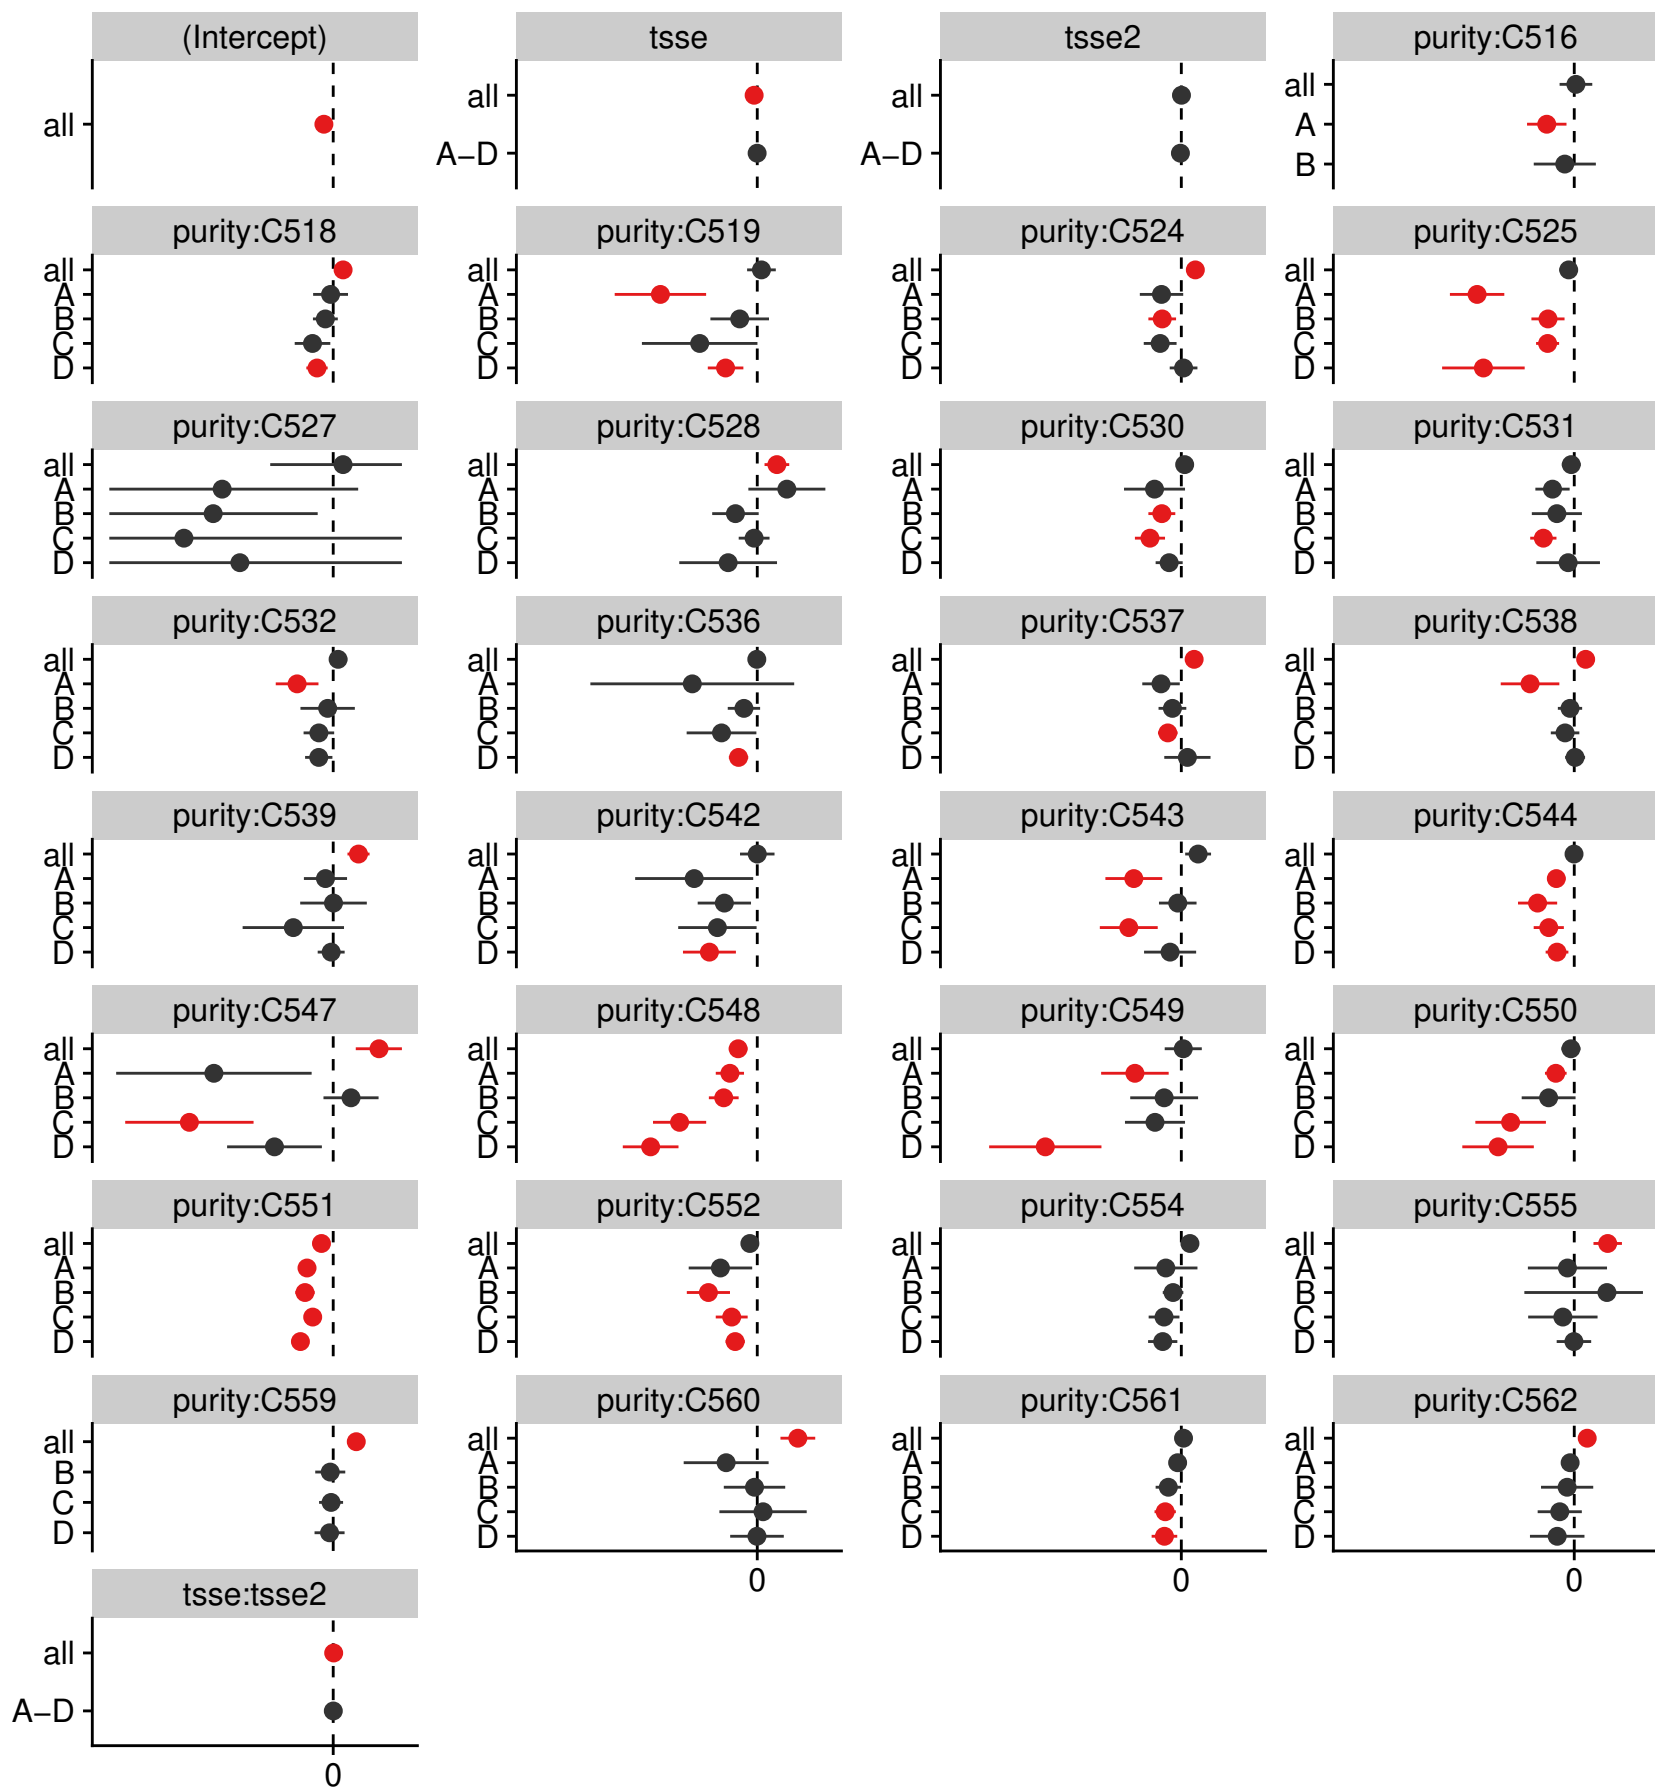

Coefficient

p\_c = < 2.22e-16, p\_sc = 1

# SOX3\_uc\_cTSS\_nPEAK

+ 10/33 (0/116), - 6/33 (54/116)

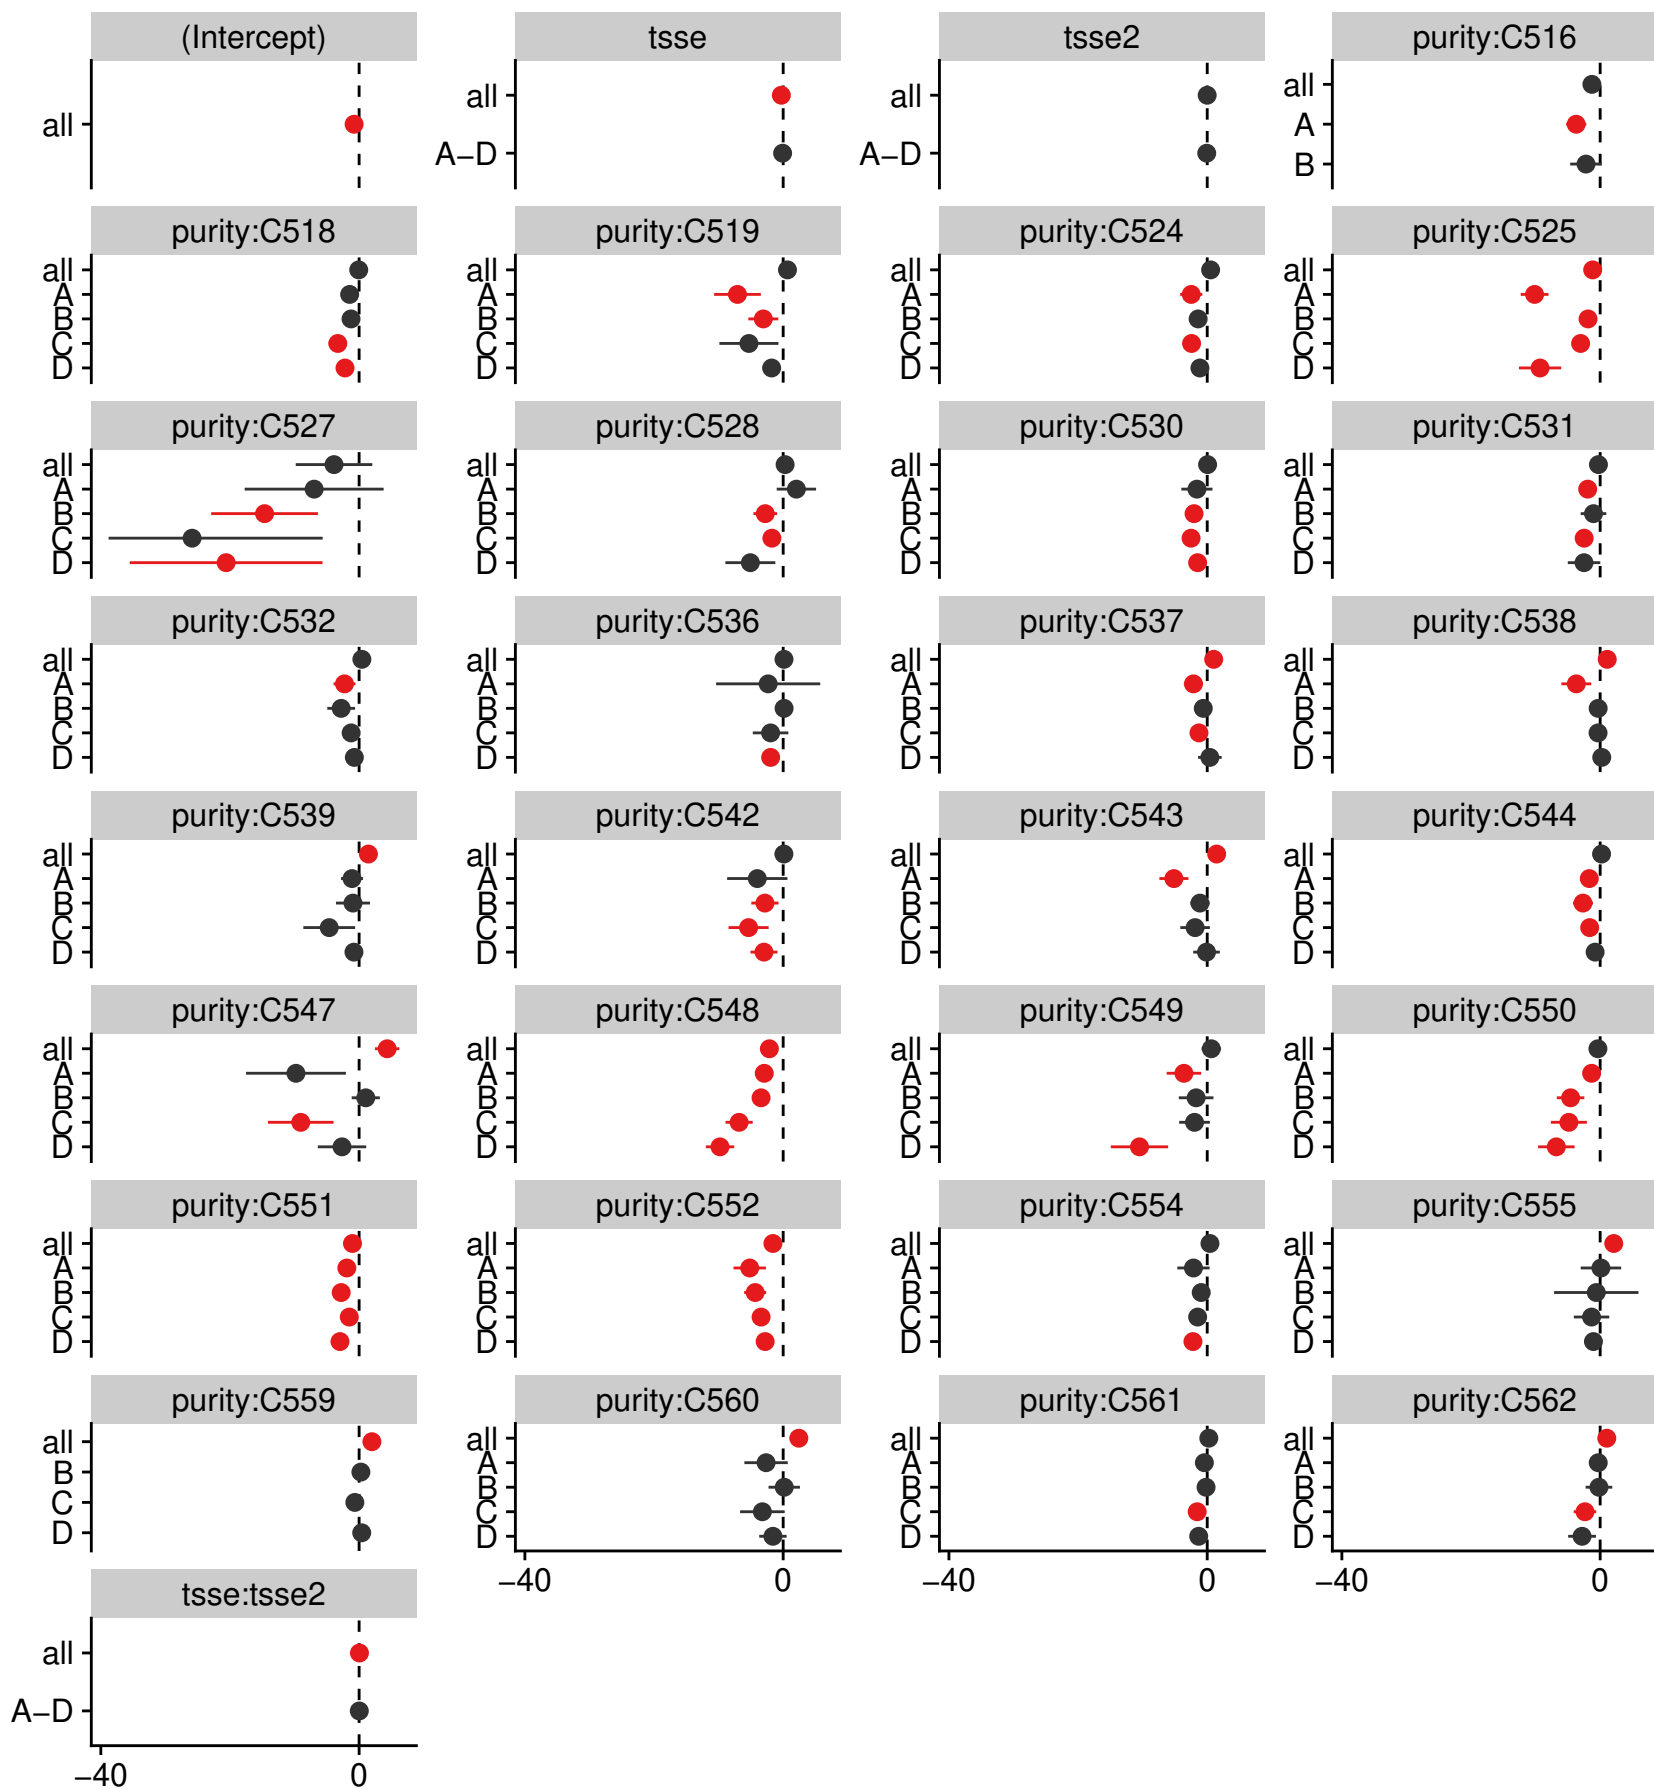

p\_c = < 2.22e-16, p\_sc = 0.48764

# SOX5\_uc\_dTSS\_nPEAK

+ 14/33 (0/116), - 5/33 (36/116)

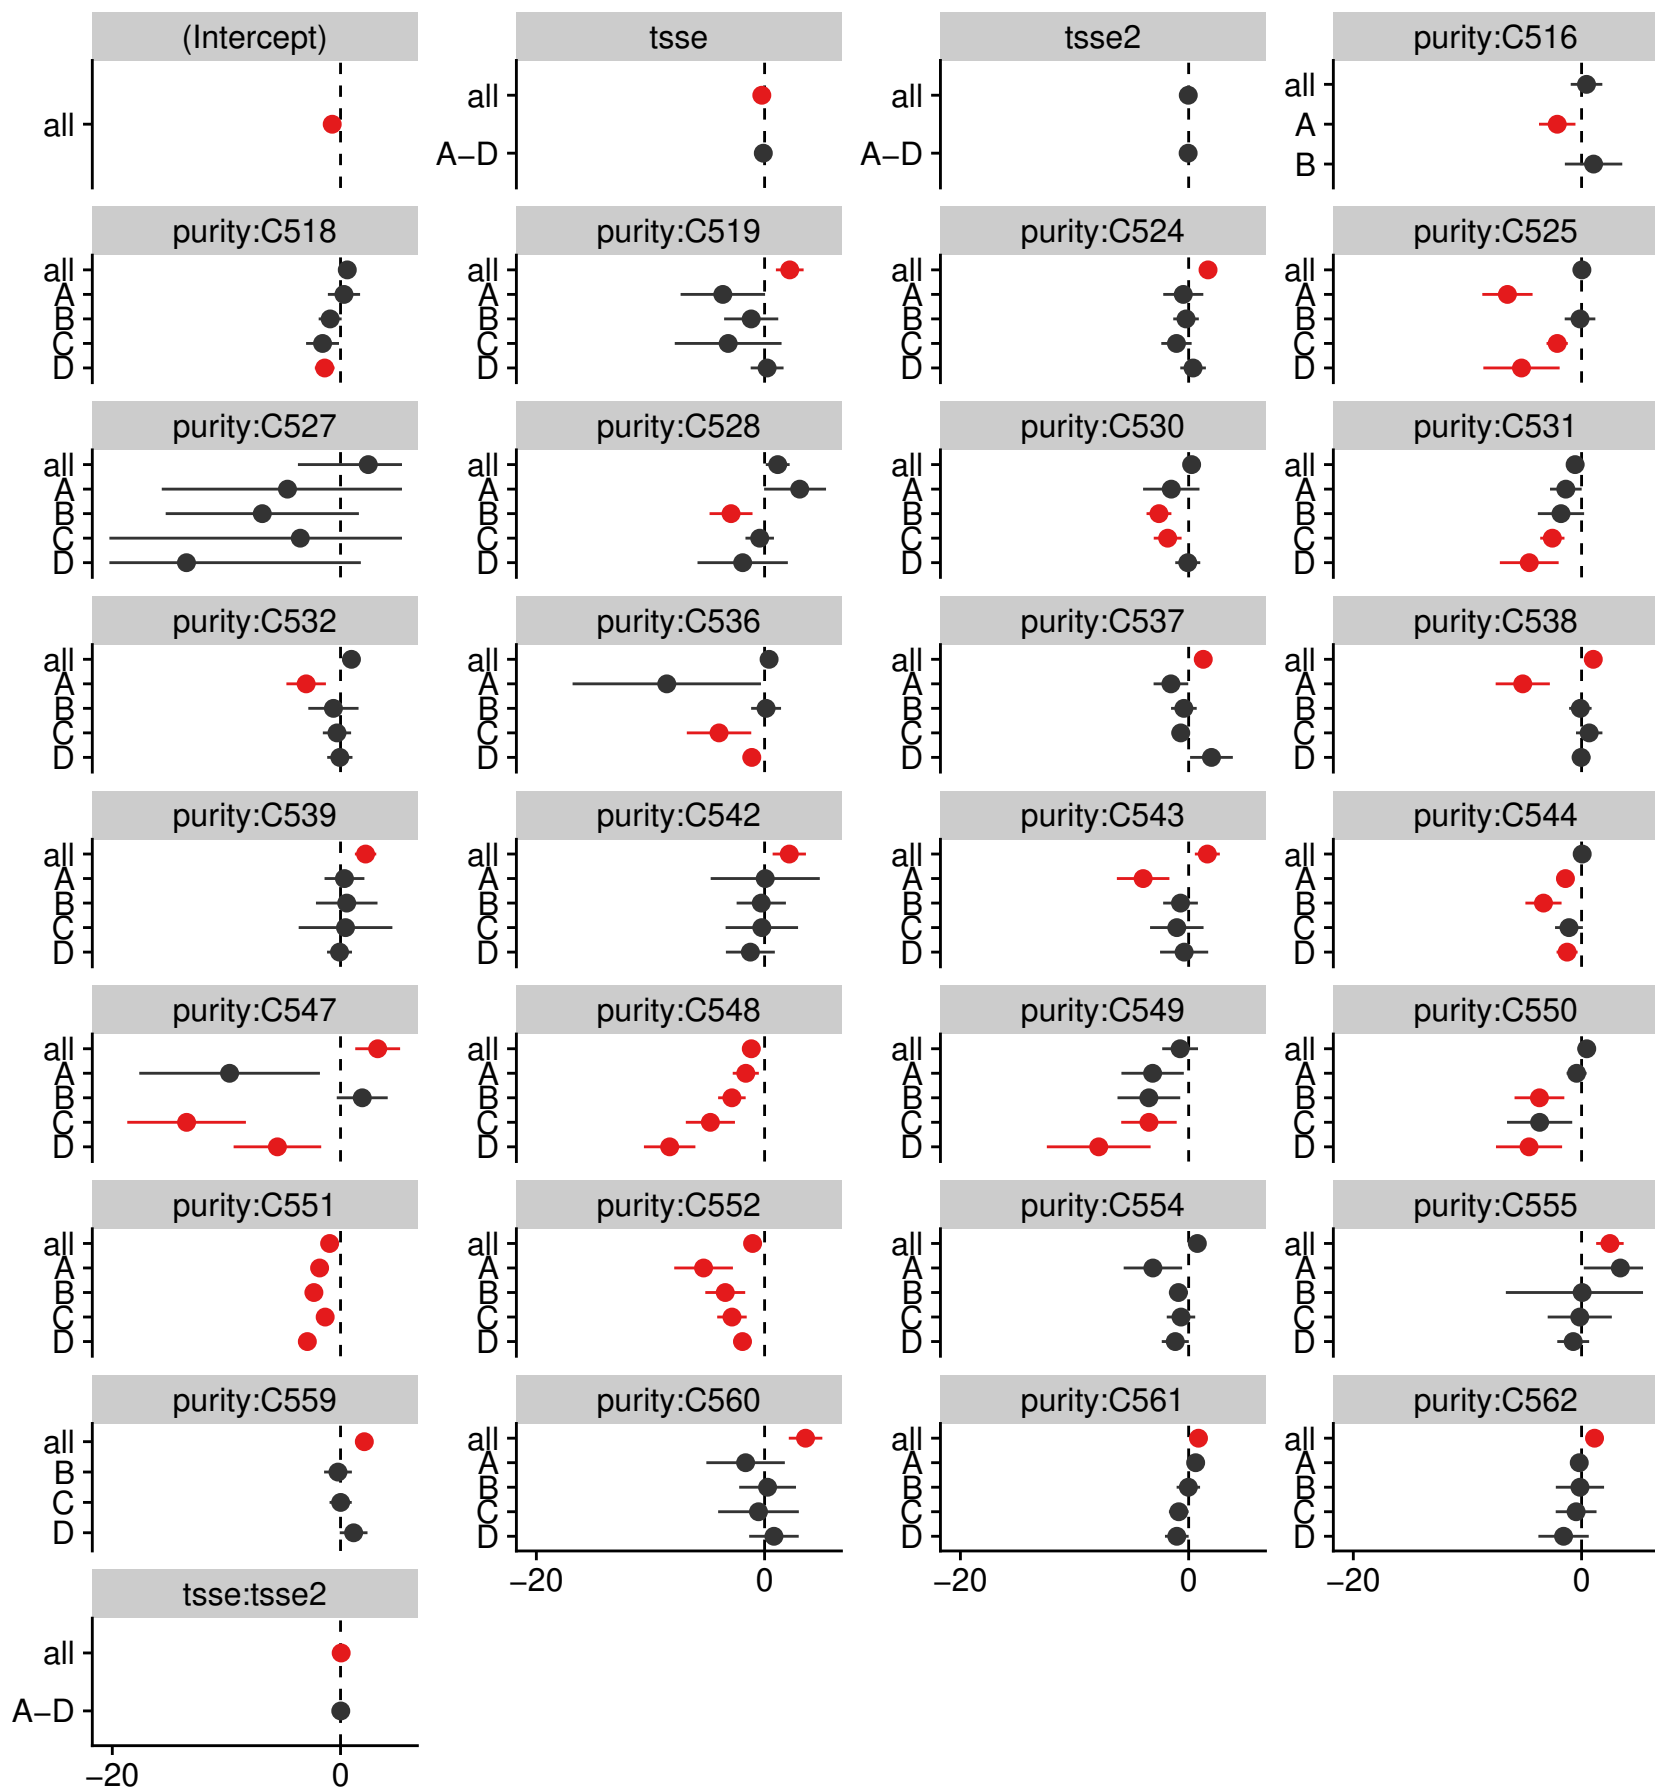

Coefficient

$p_c = < 2.22e-16$ ,  $p_{sc} = 0.040241$

# SOX6\_uc\_dTSS\_nPEAK

+ 14/33 (0/116), - 5/33 (36/116)

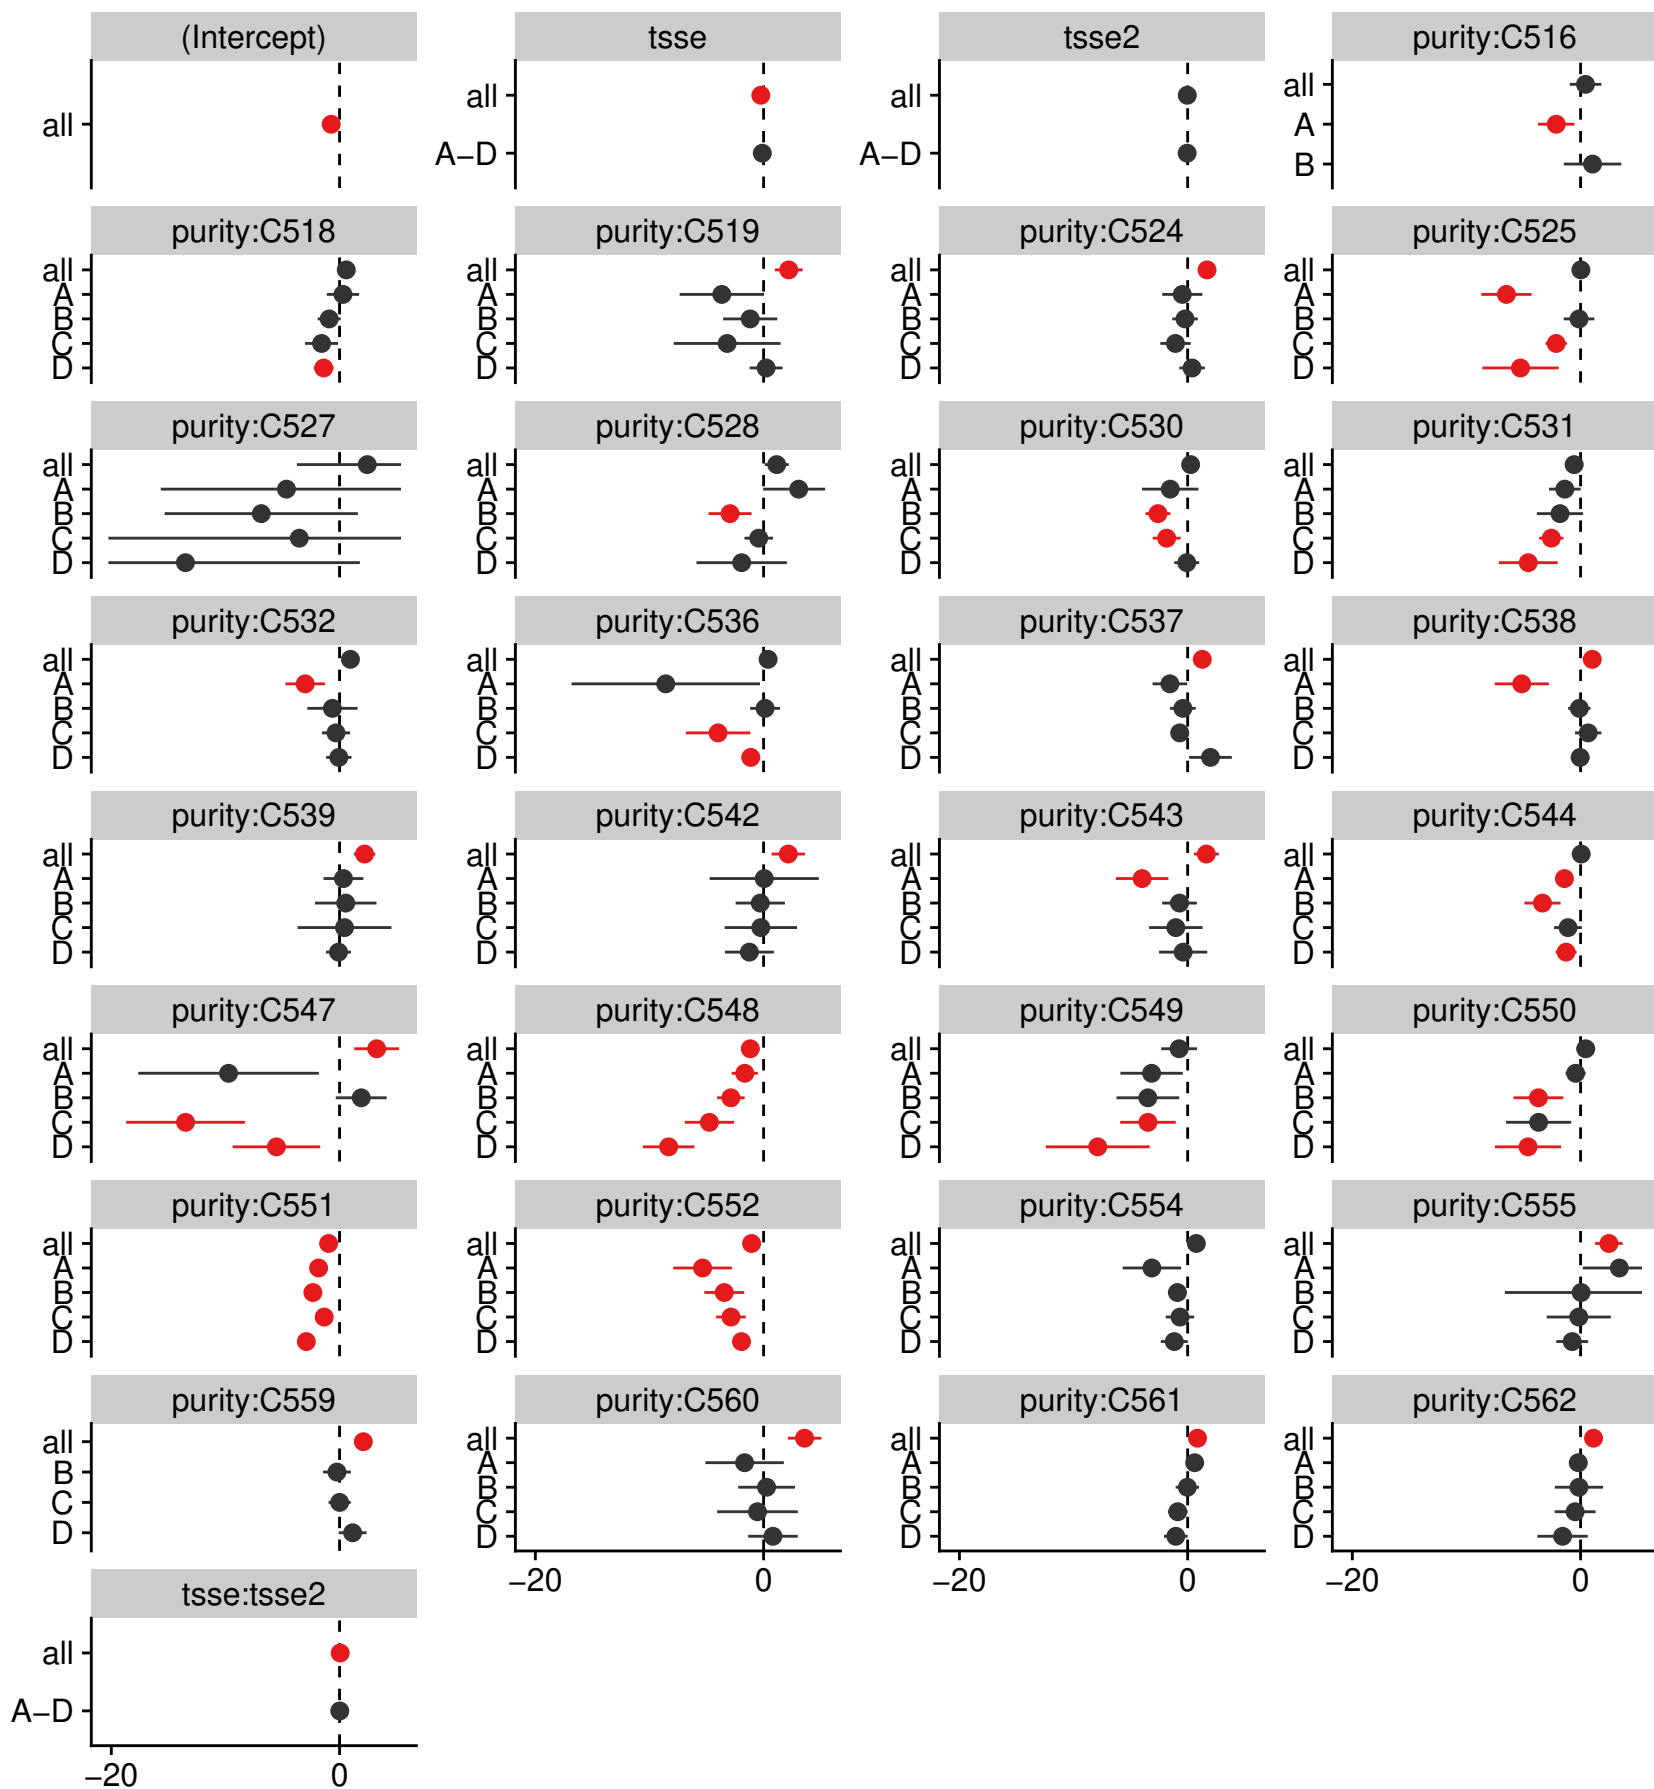

Coefficient

$p_c = < 2.22e-16$ ,  $p_{sc} = 0.040241$

# SP3\_uc\_pTSS\_nPEAK

+ 3/33 (5/116), - 14/33 (39/116)

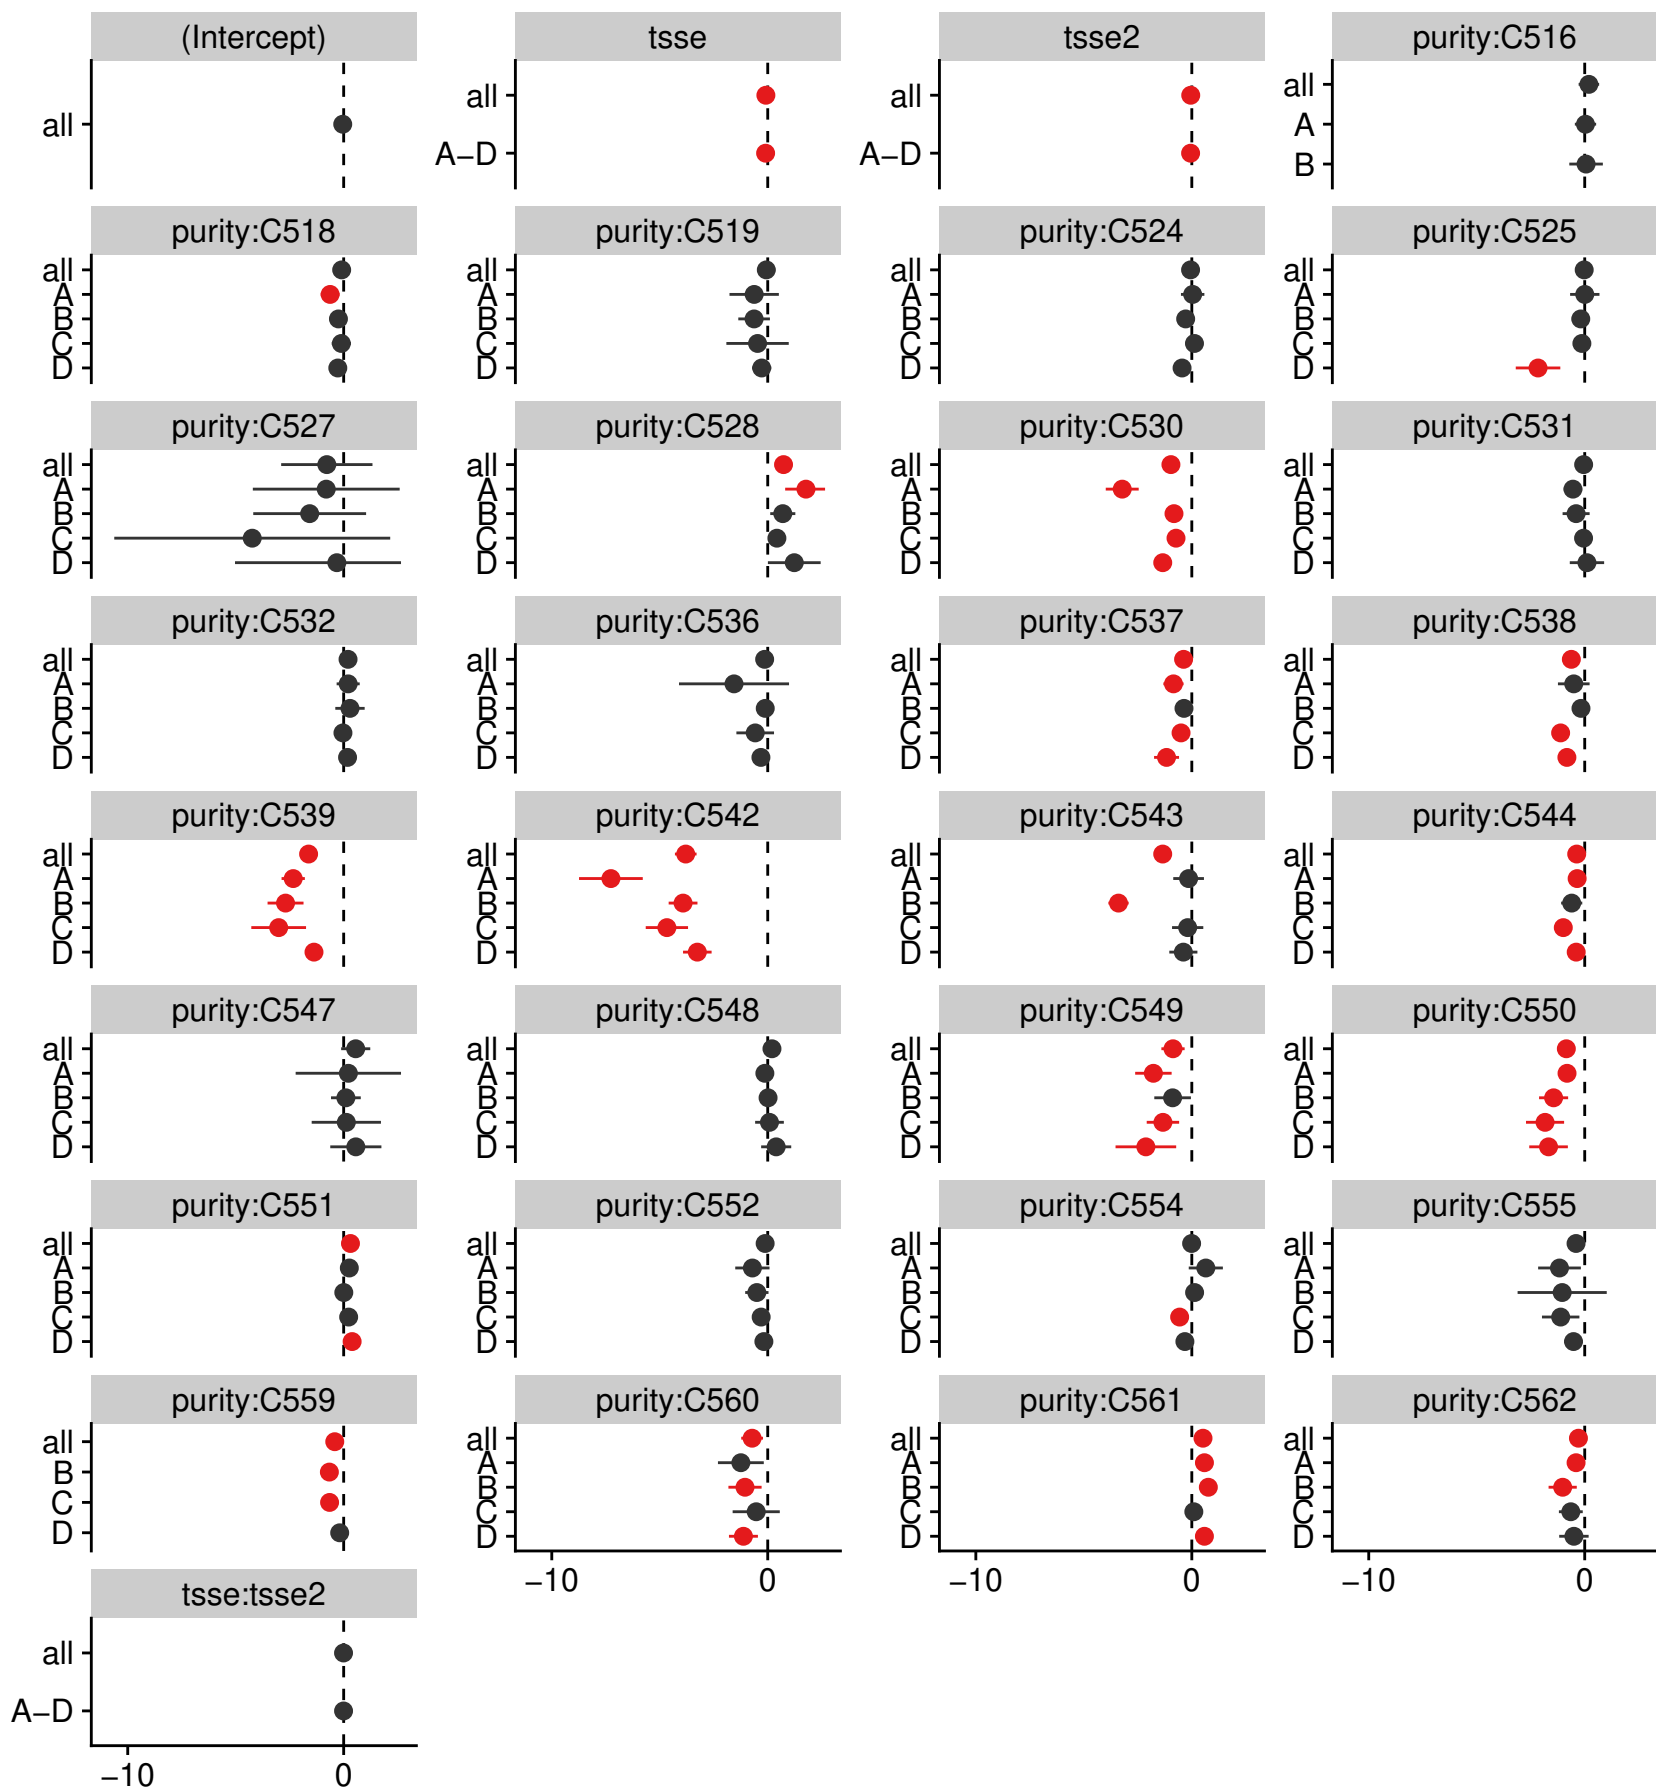

p\_c = < 2.22e-16, p\_sc = < 2.22e-16

$+ 2/33 (4/116), - 23/33 (56/116)$ 
$$p_c = < 2.22e-16, p_{sc} = 2.3597e-12$$

# SPI1\_uc\_cTSS\_oPEAK

+ 3/33 (9/116), - 24/33 (29/116)

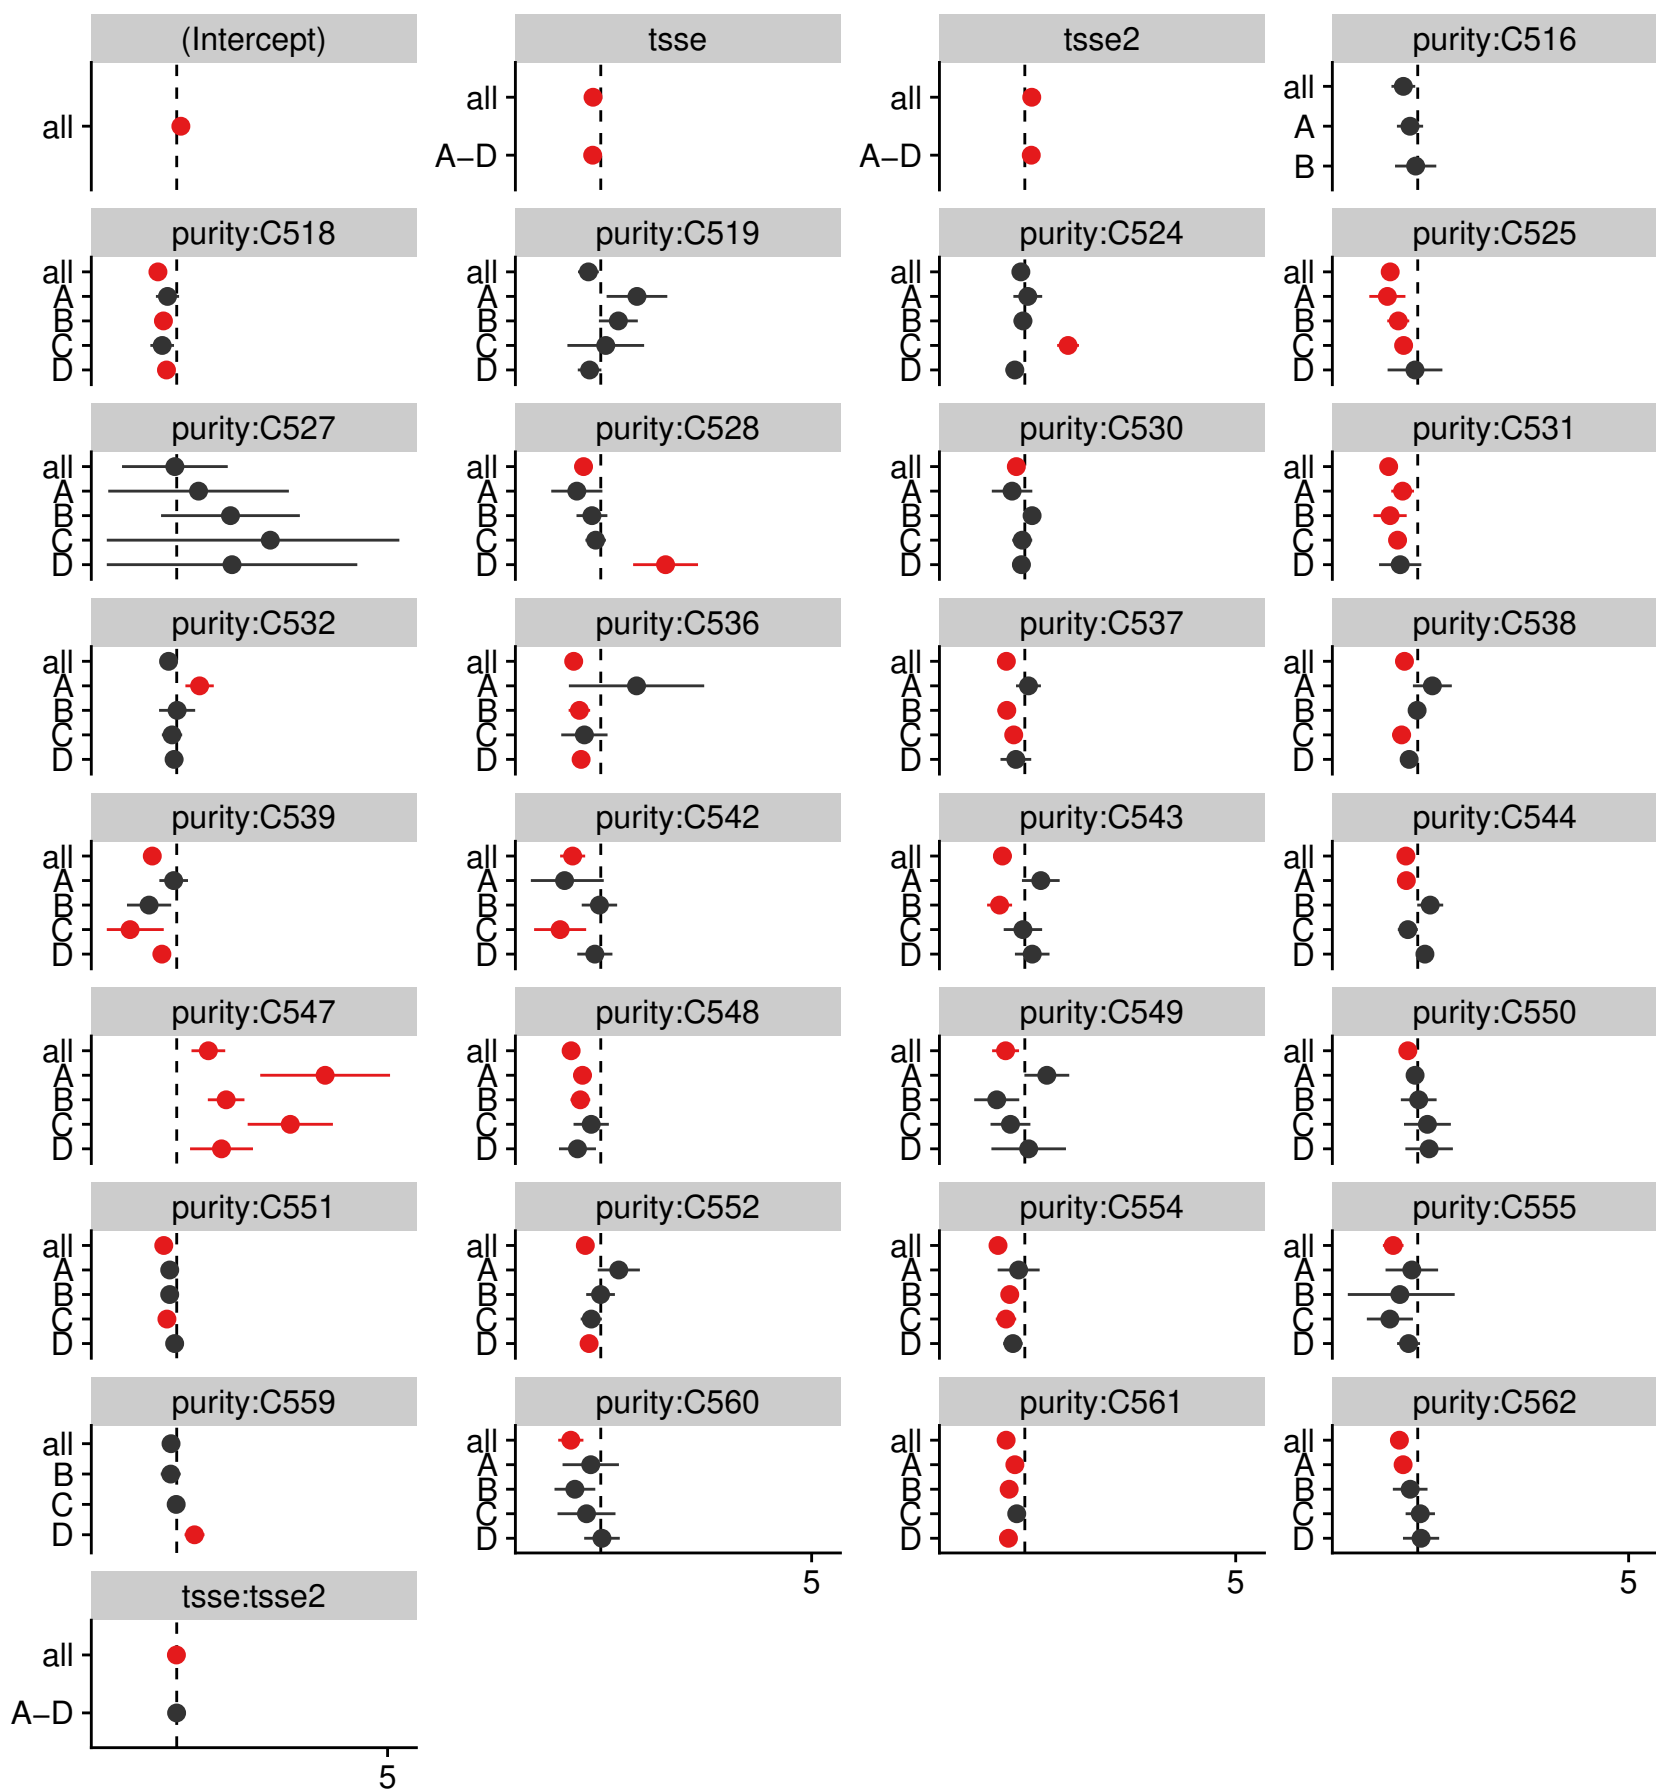

Coefficient

p\_c = < 2.22e-16, p\_sc = 5.8439e-09

# SPI1\_uc\_dTSS\_nPEAK

+ 2/33 (4/116), - 23/33 (58/116)

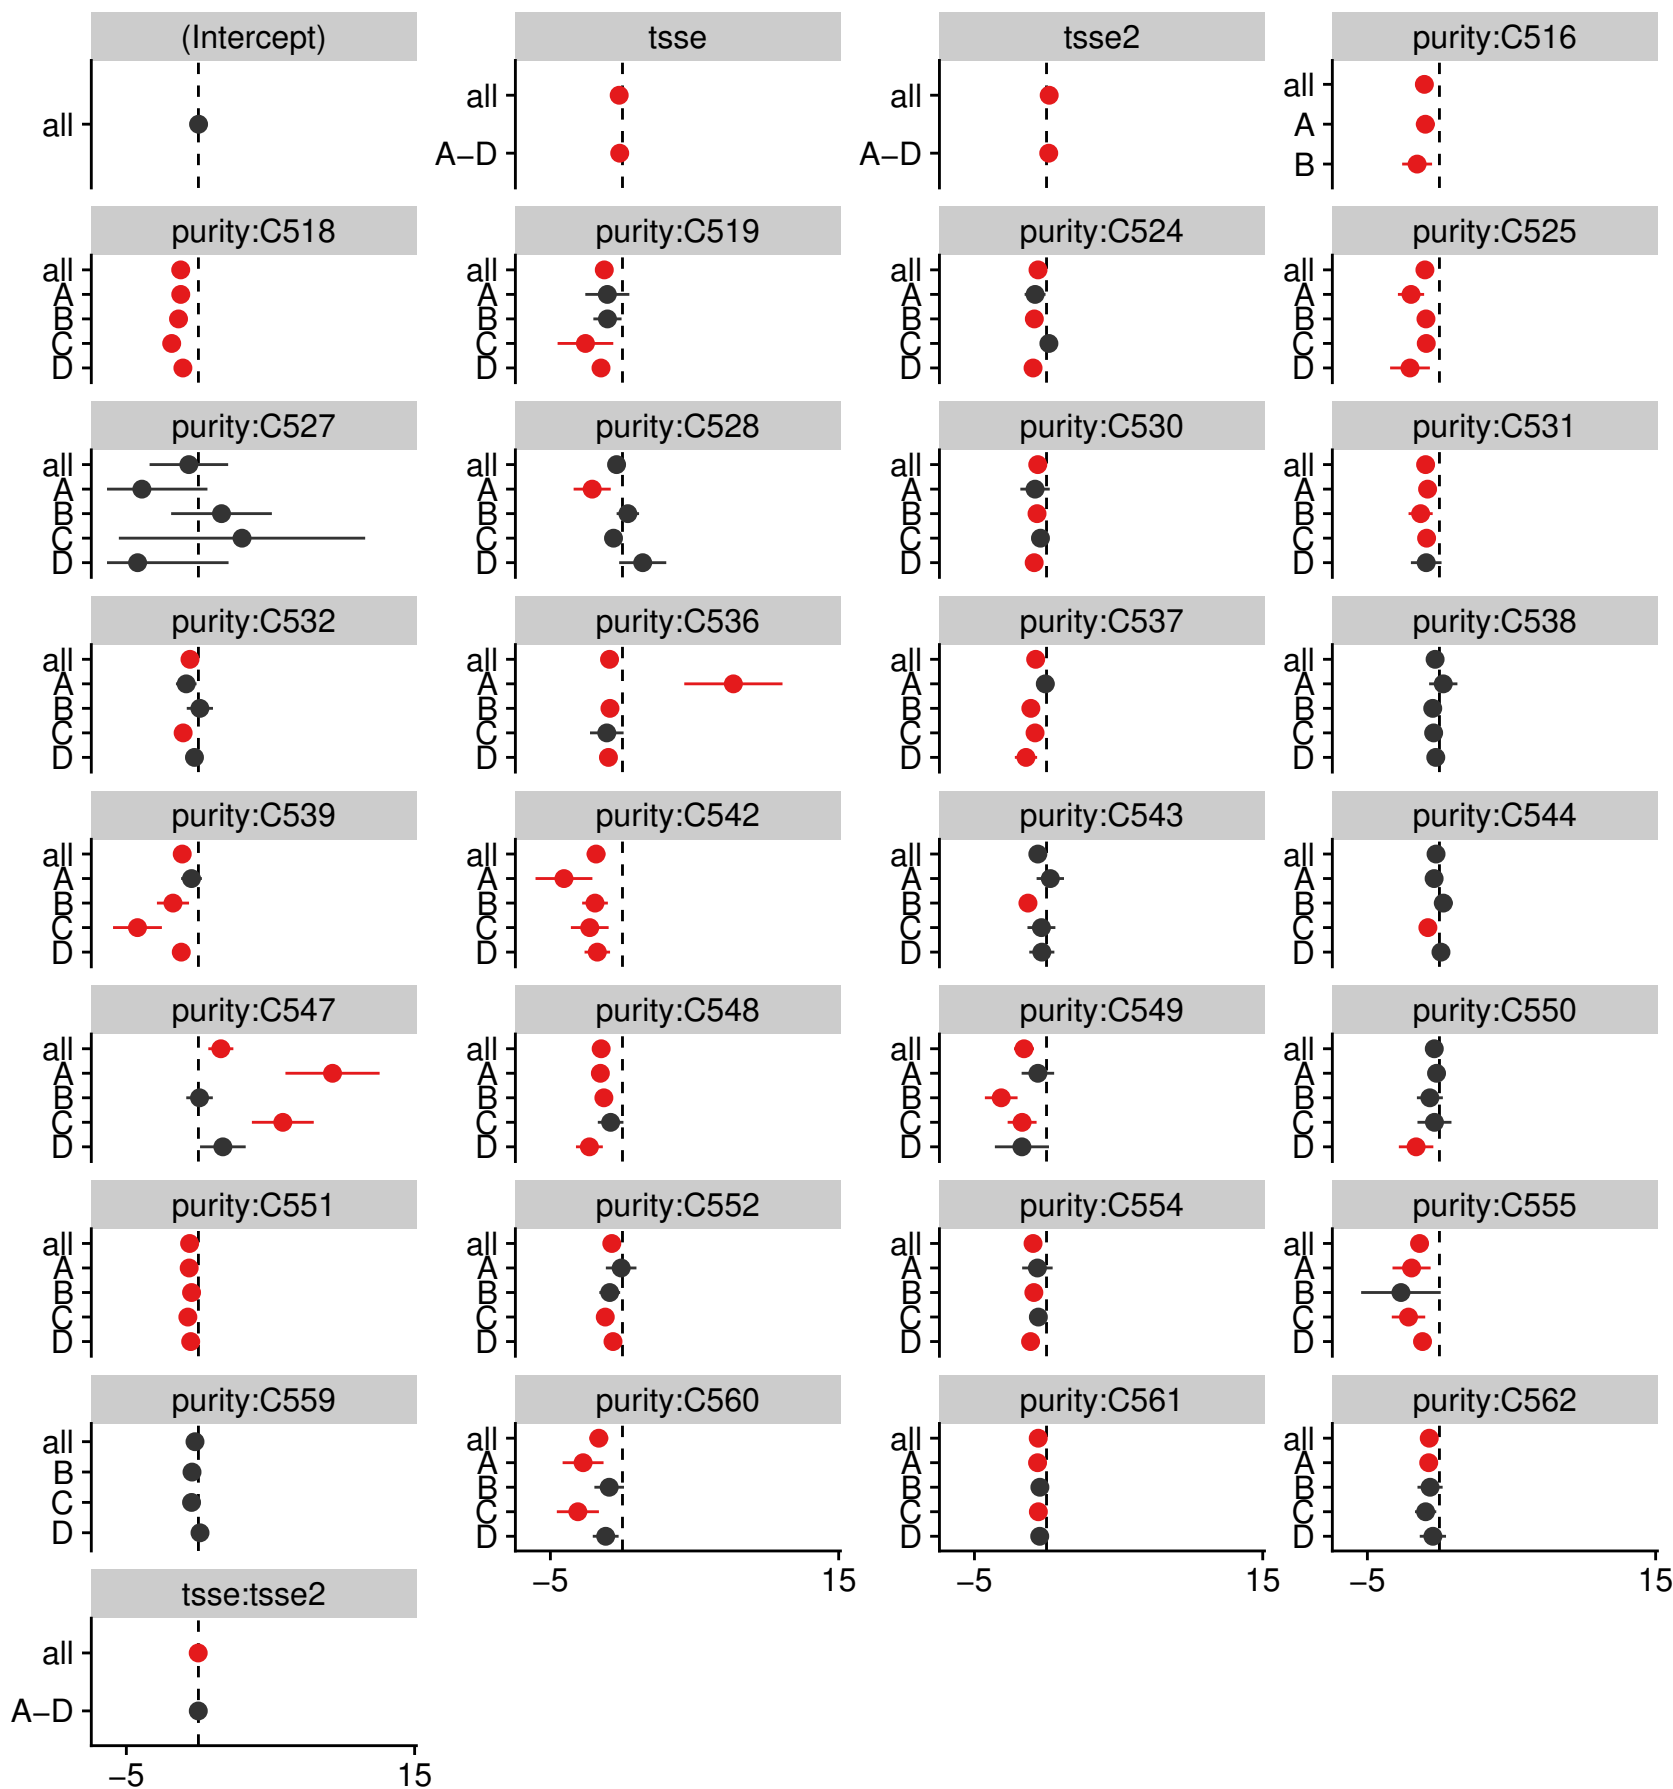

p\_c = < 2.22e-16, p\_sc = 1.0283e-13



# SPI1\_uc\_dTSS\_oPEAK

+ 3/33 (8/116), - 24/33 (38/116)

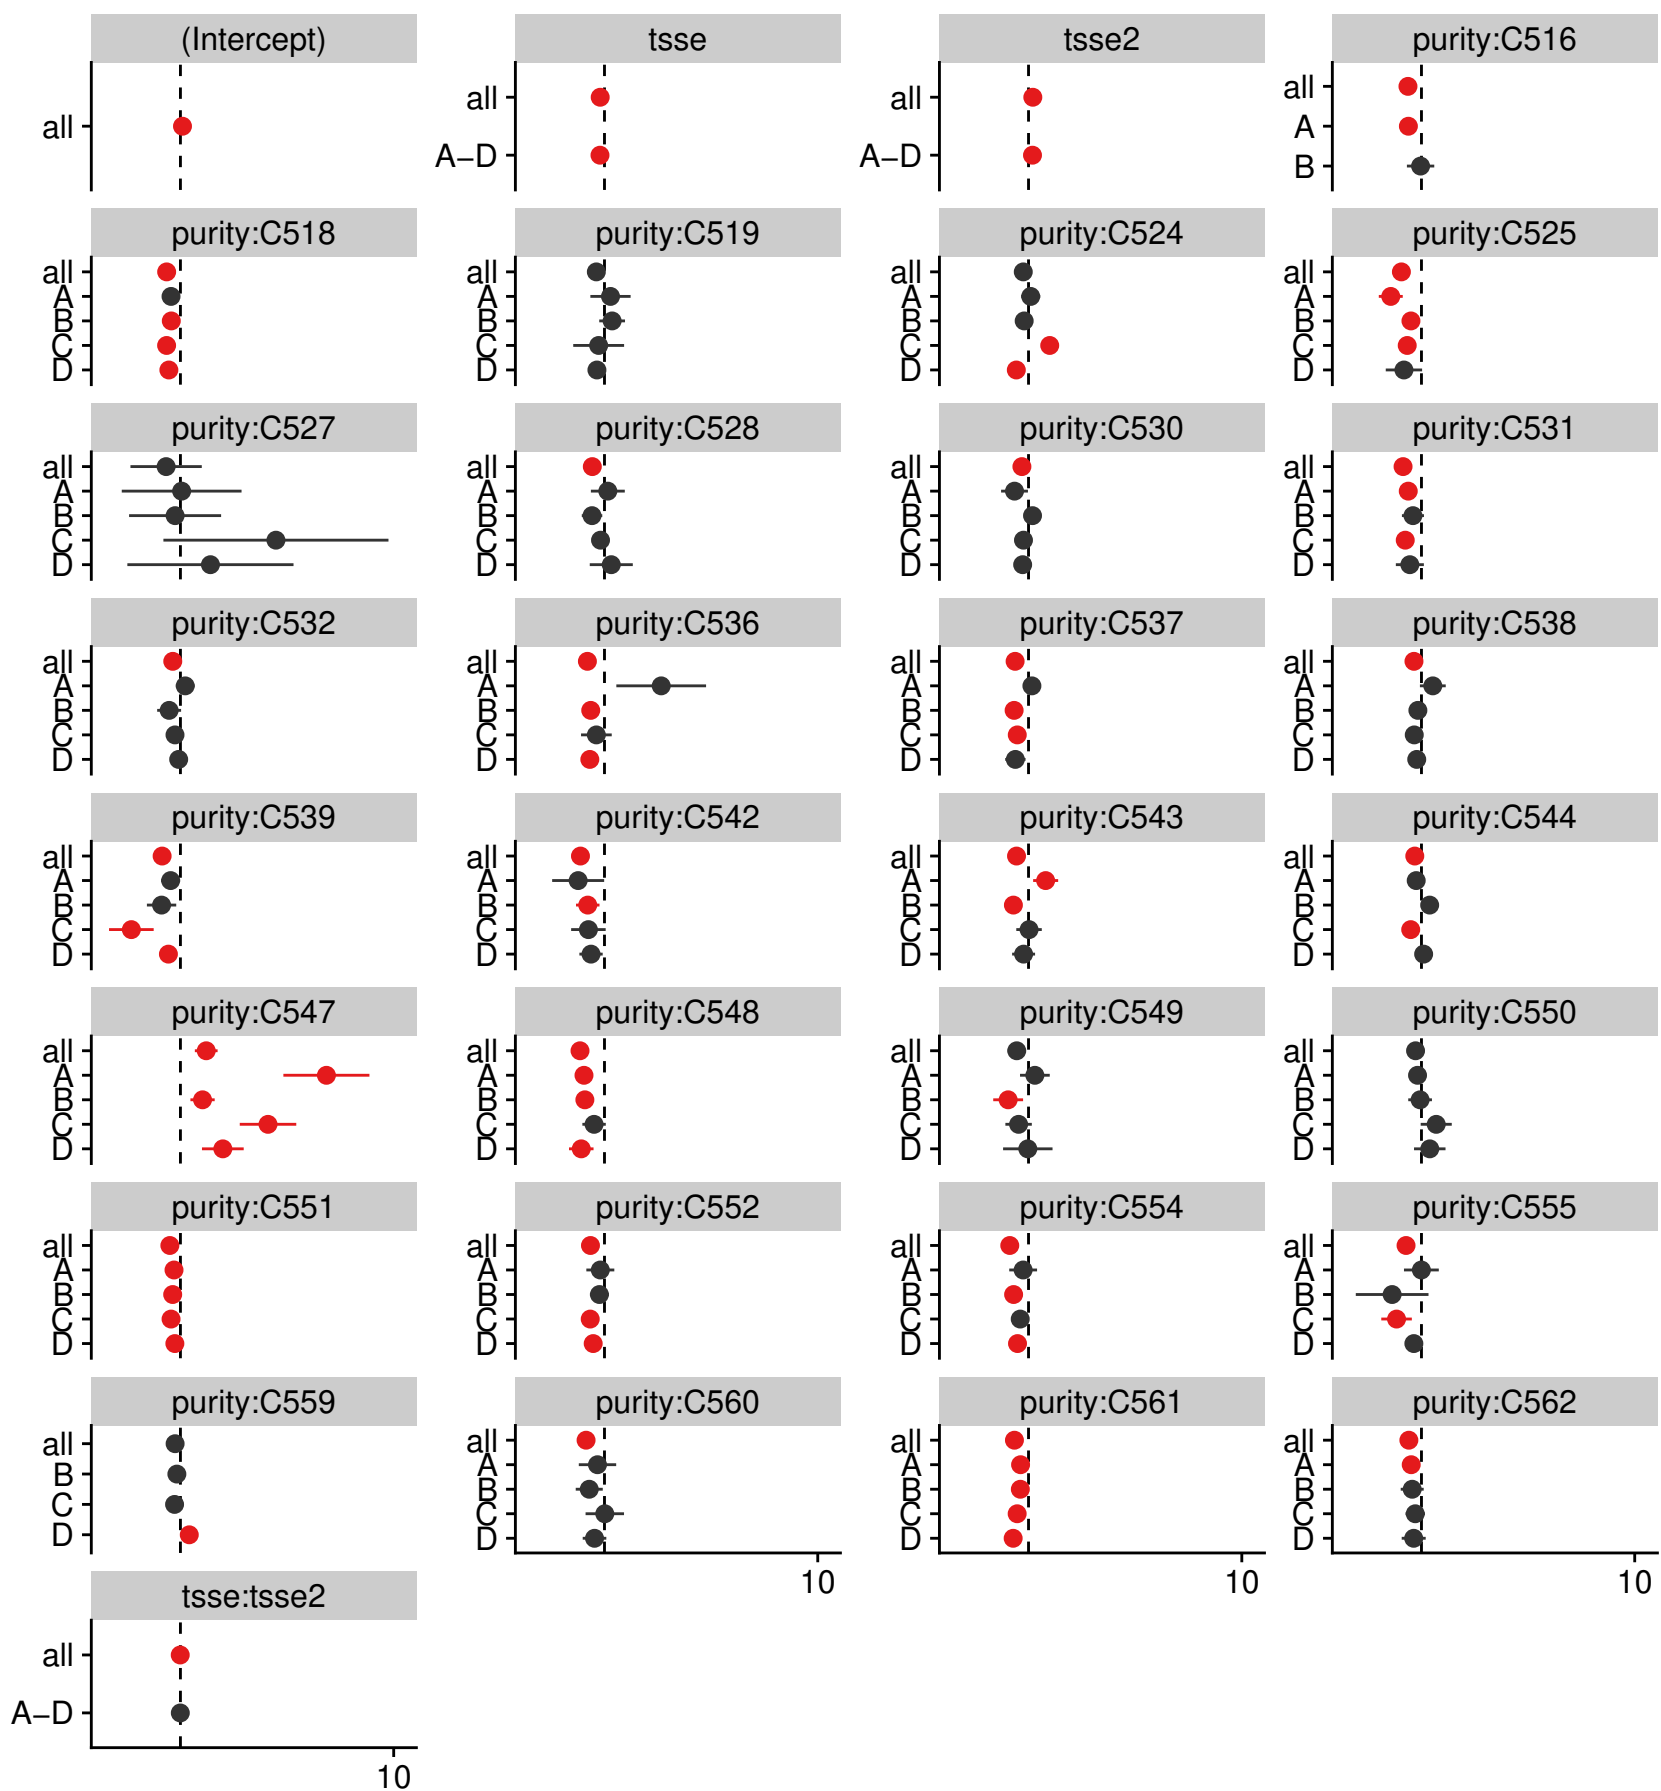

Coefficient

p\_c = < 2.22e-16, p\_sc = 1.9372e-12

# SPI1\_uc\_pTSS\_nPEAK

+ 0/33 (0/116), - 16/33 (30/116)

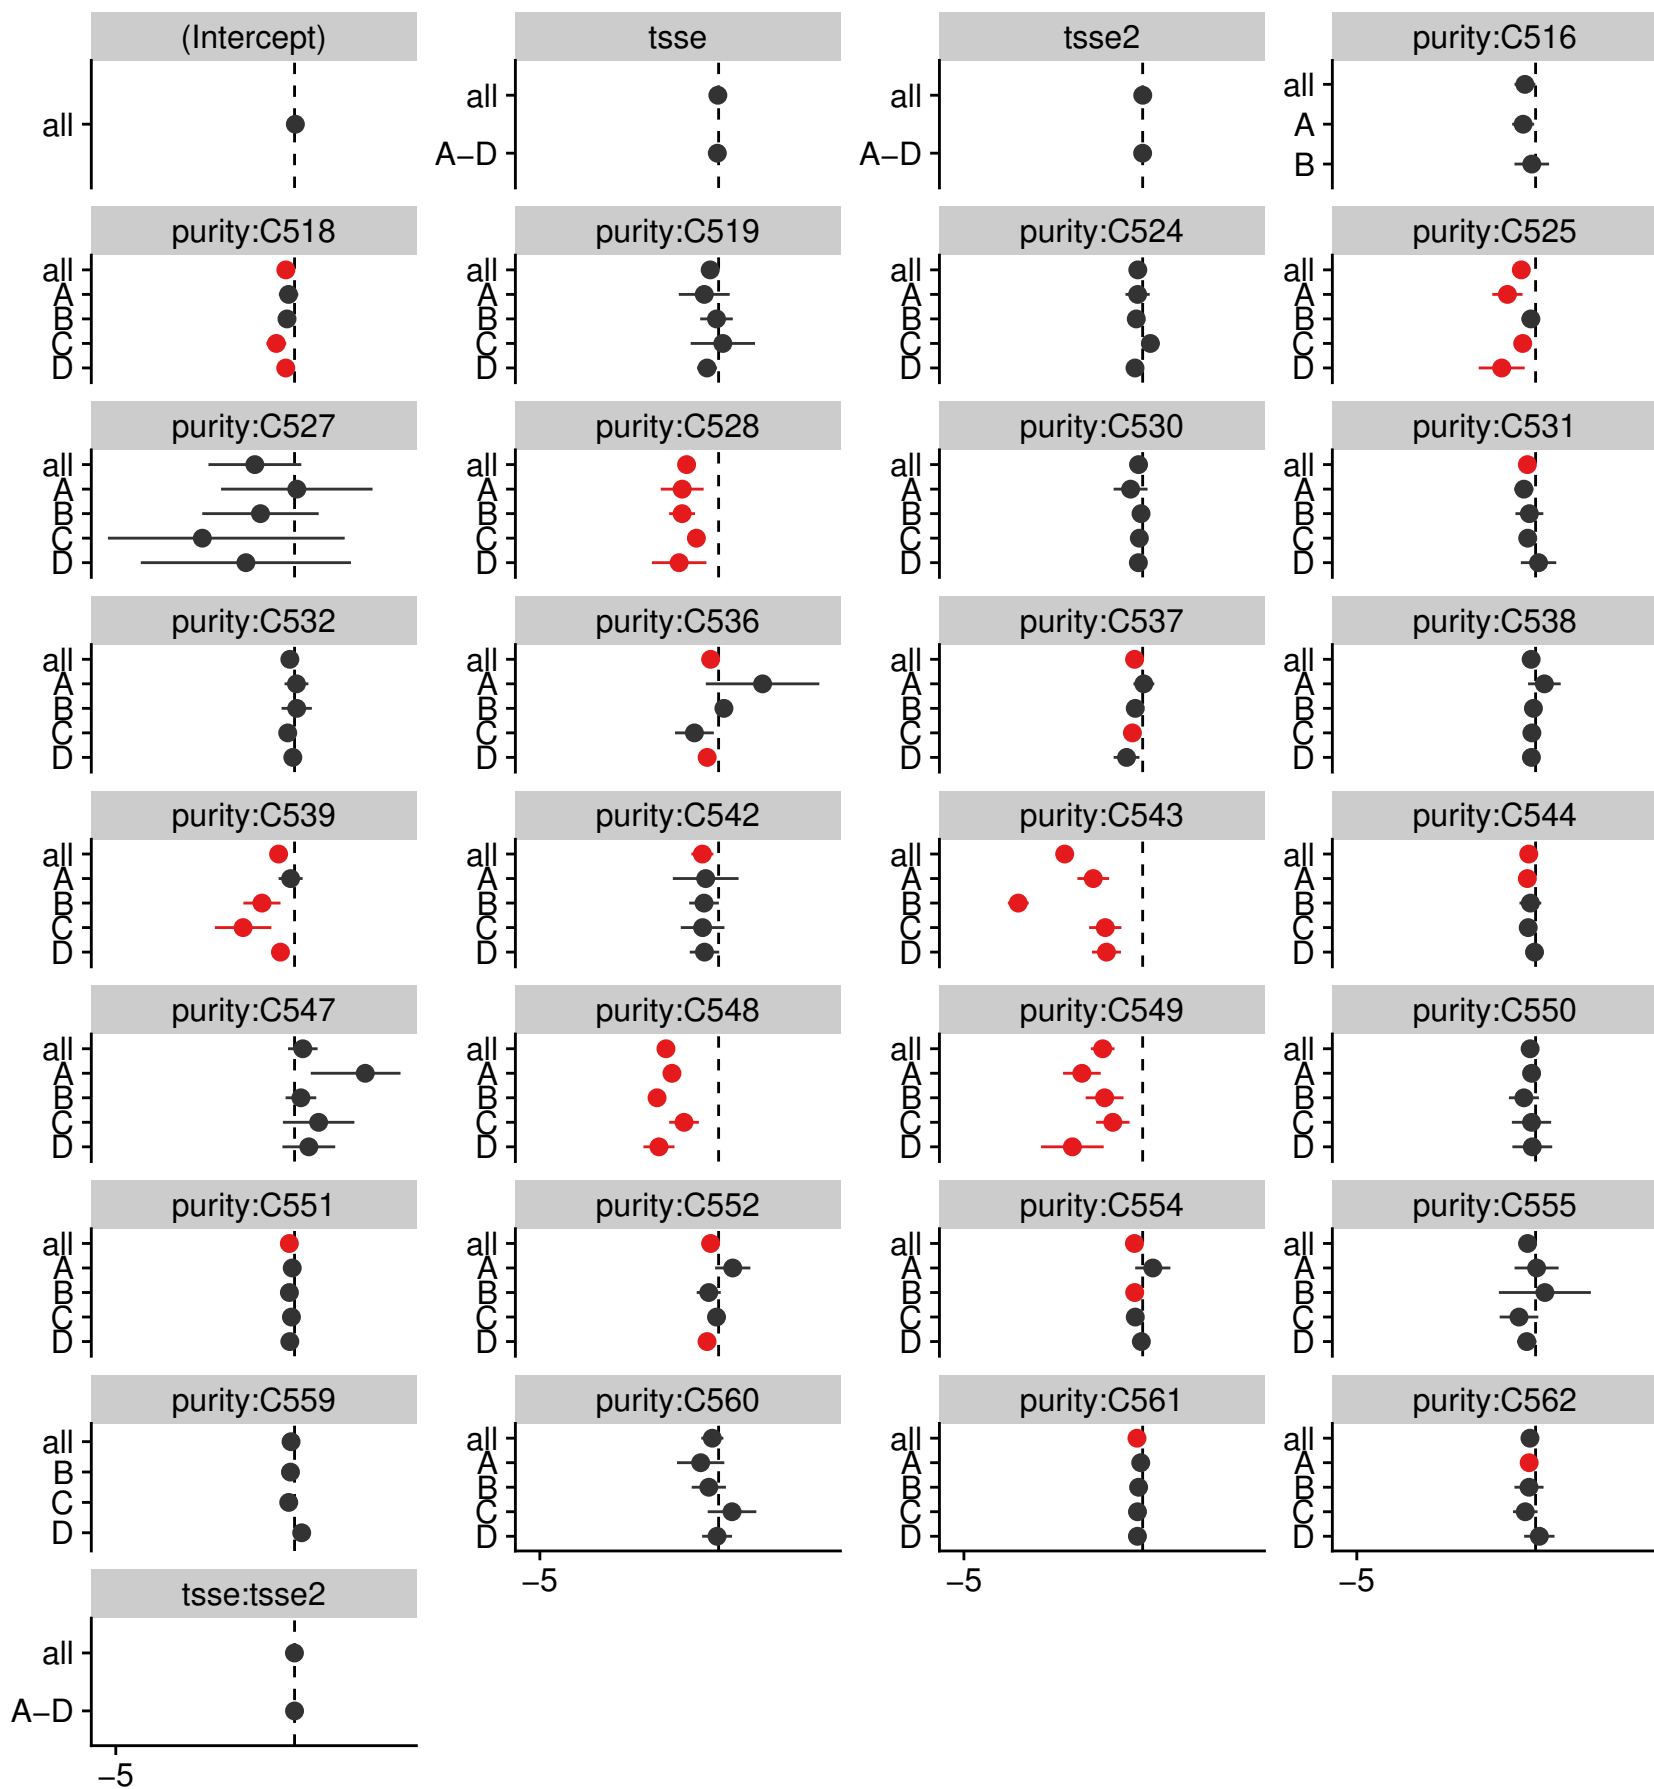

Coefficient

p\_c = < 2.22e-16, p\_sc = < 2.22e-16

# SPI1\_uc\_pTSS\_oPEAK

+ 3/33 (8/116), - 20/33 (29/116)

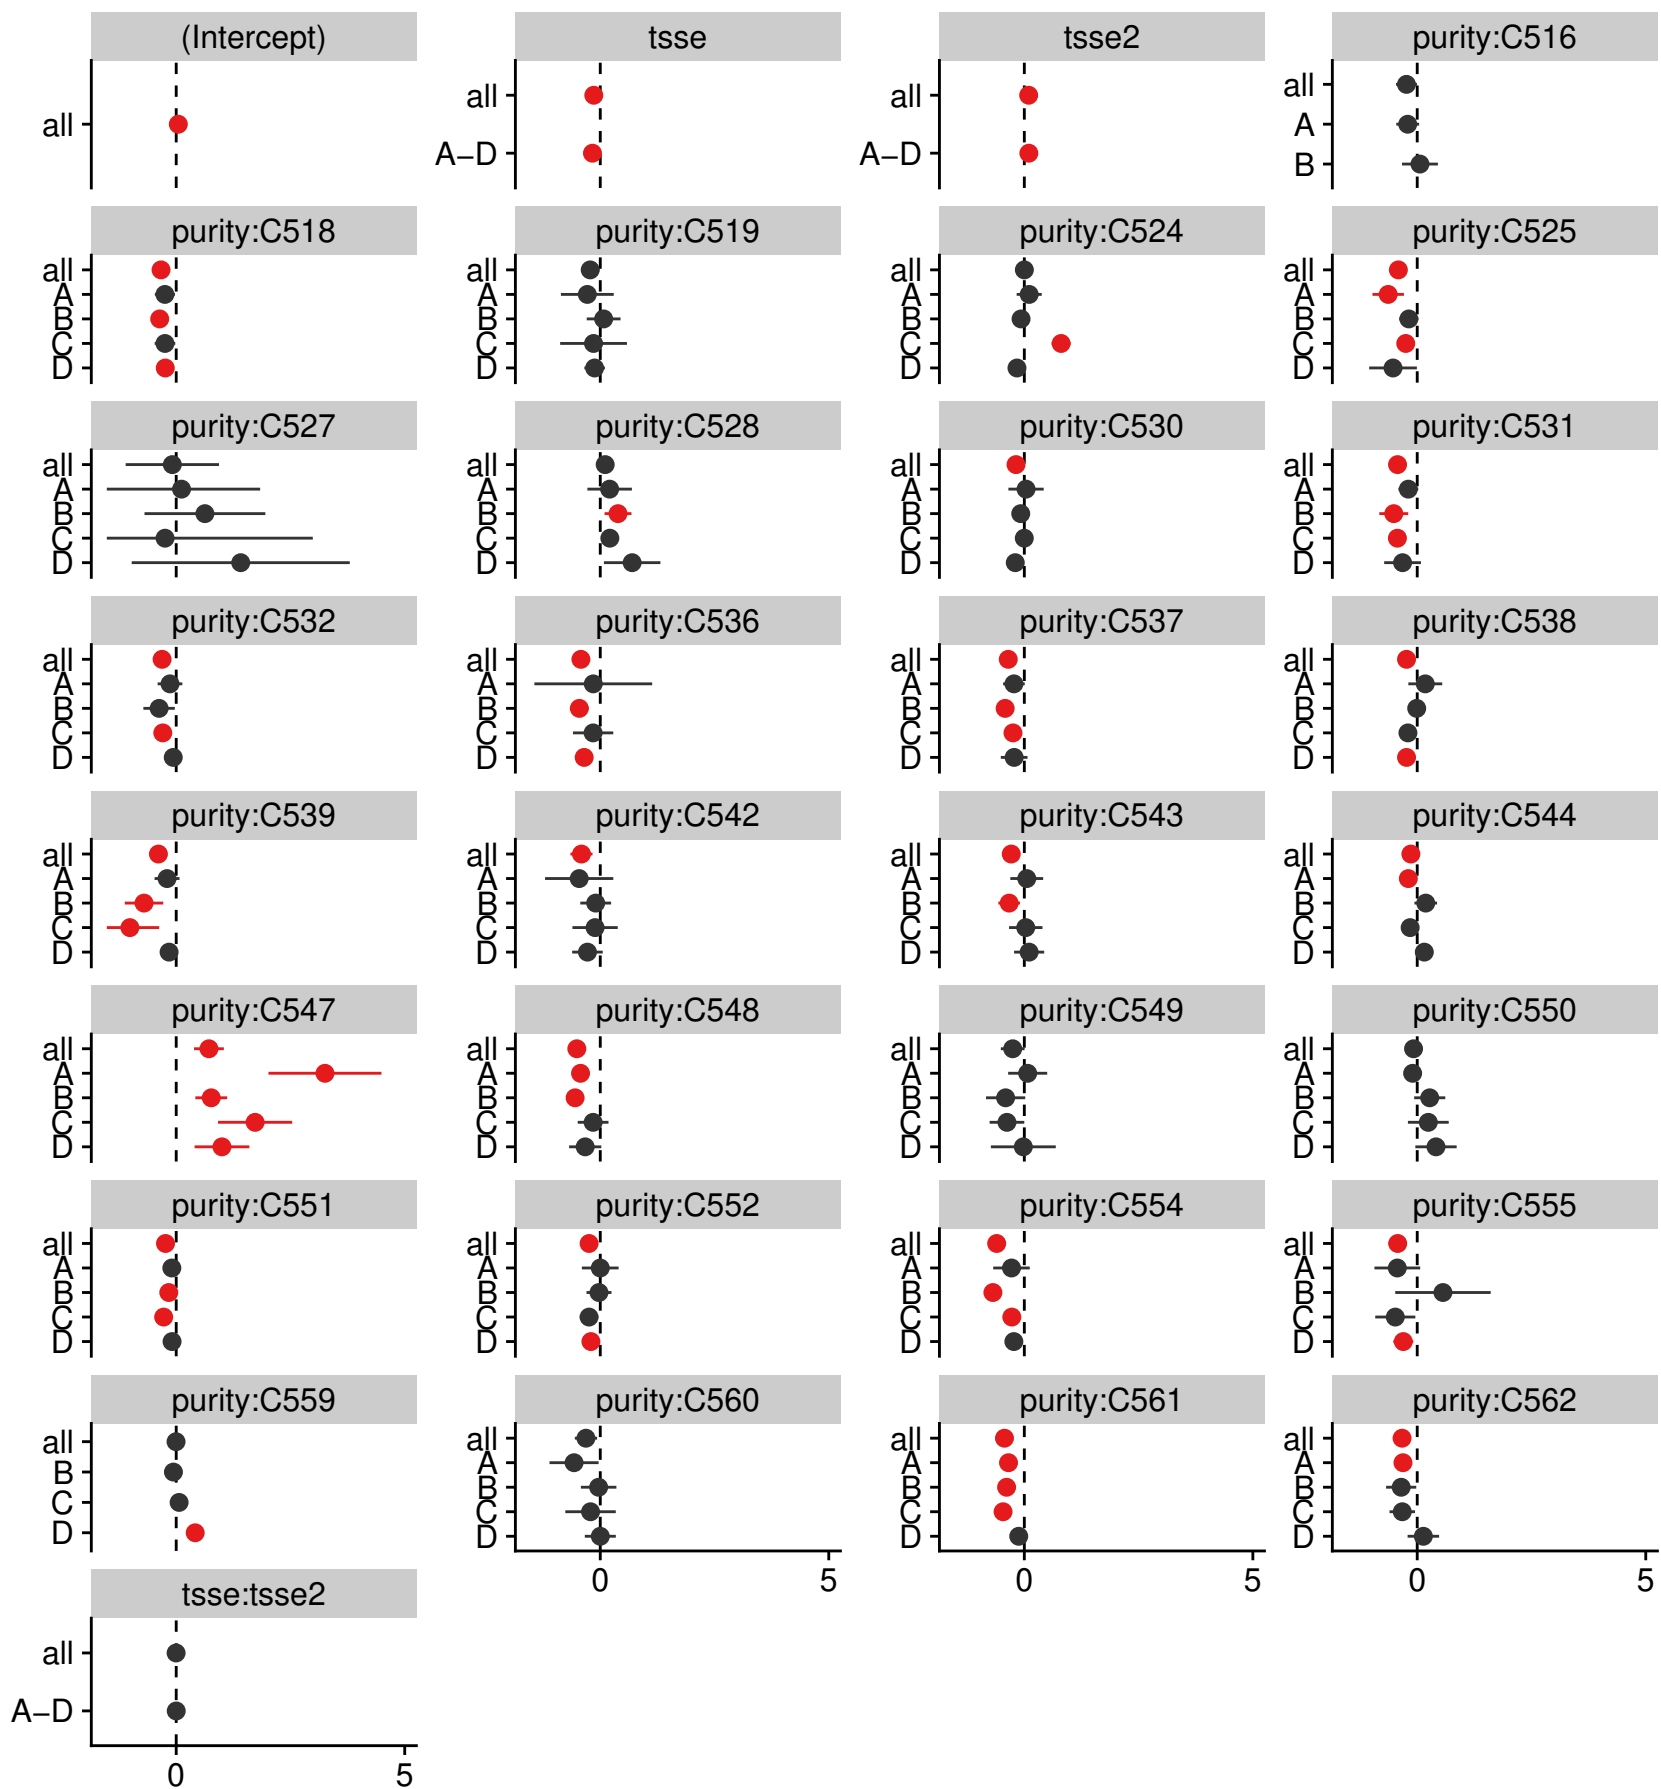

Coefficient

p\_c = < 2.22e-16, p\_sc = 8.4342e-12

# SPIB\_uc\_cTSS\_nPEAK

+ 2/33 (5/116), - 19/33 (26/116)

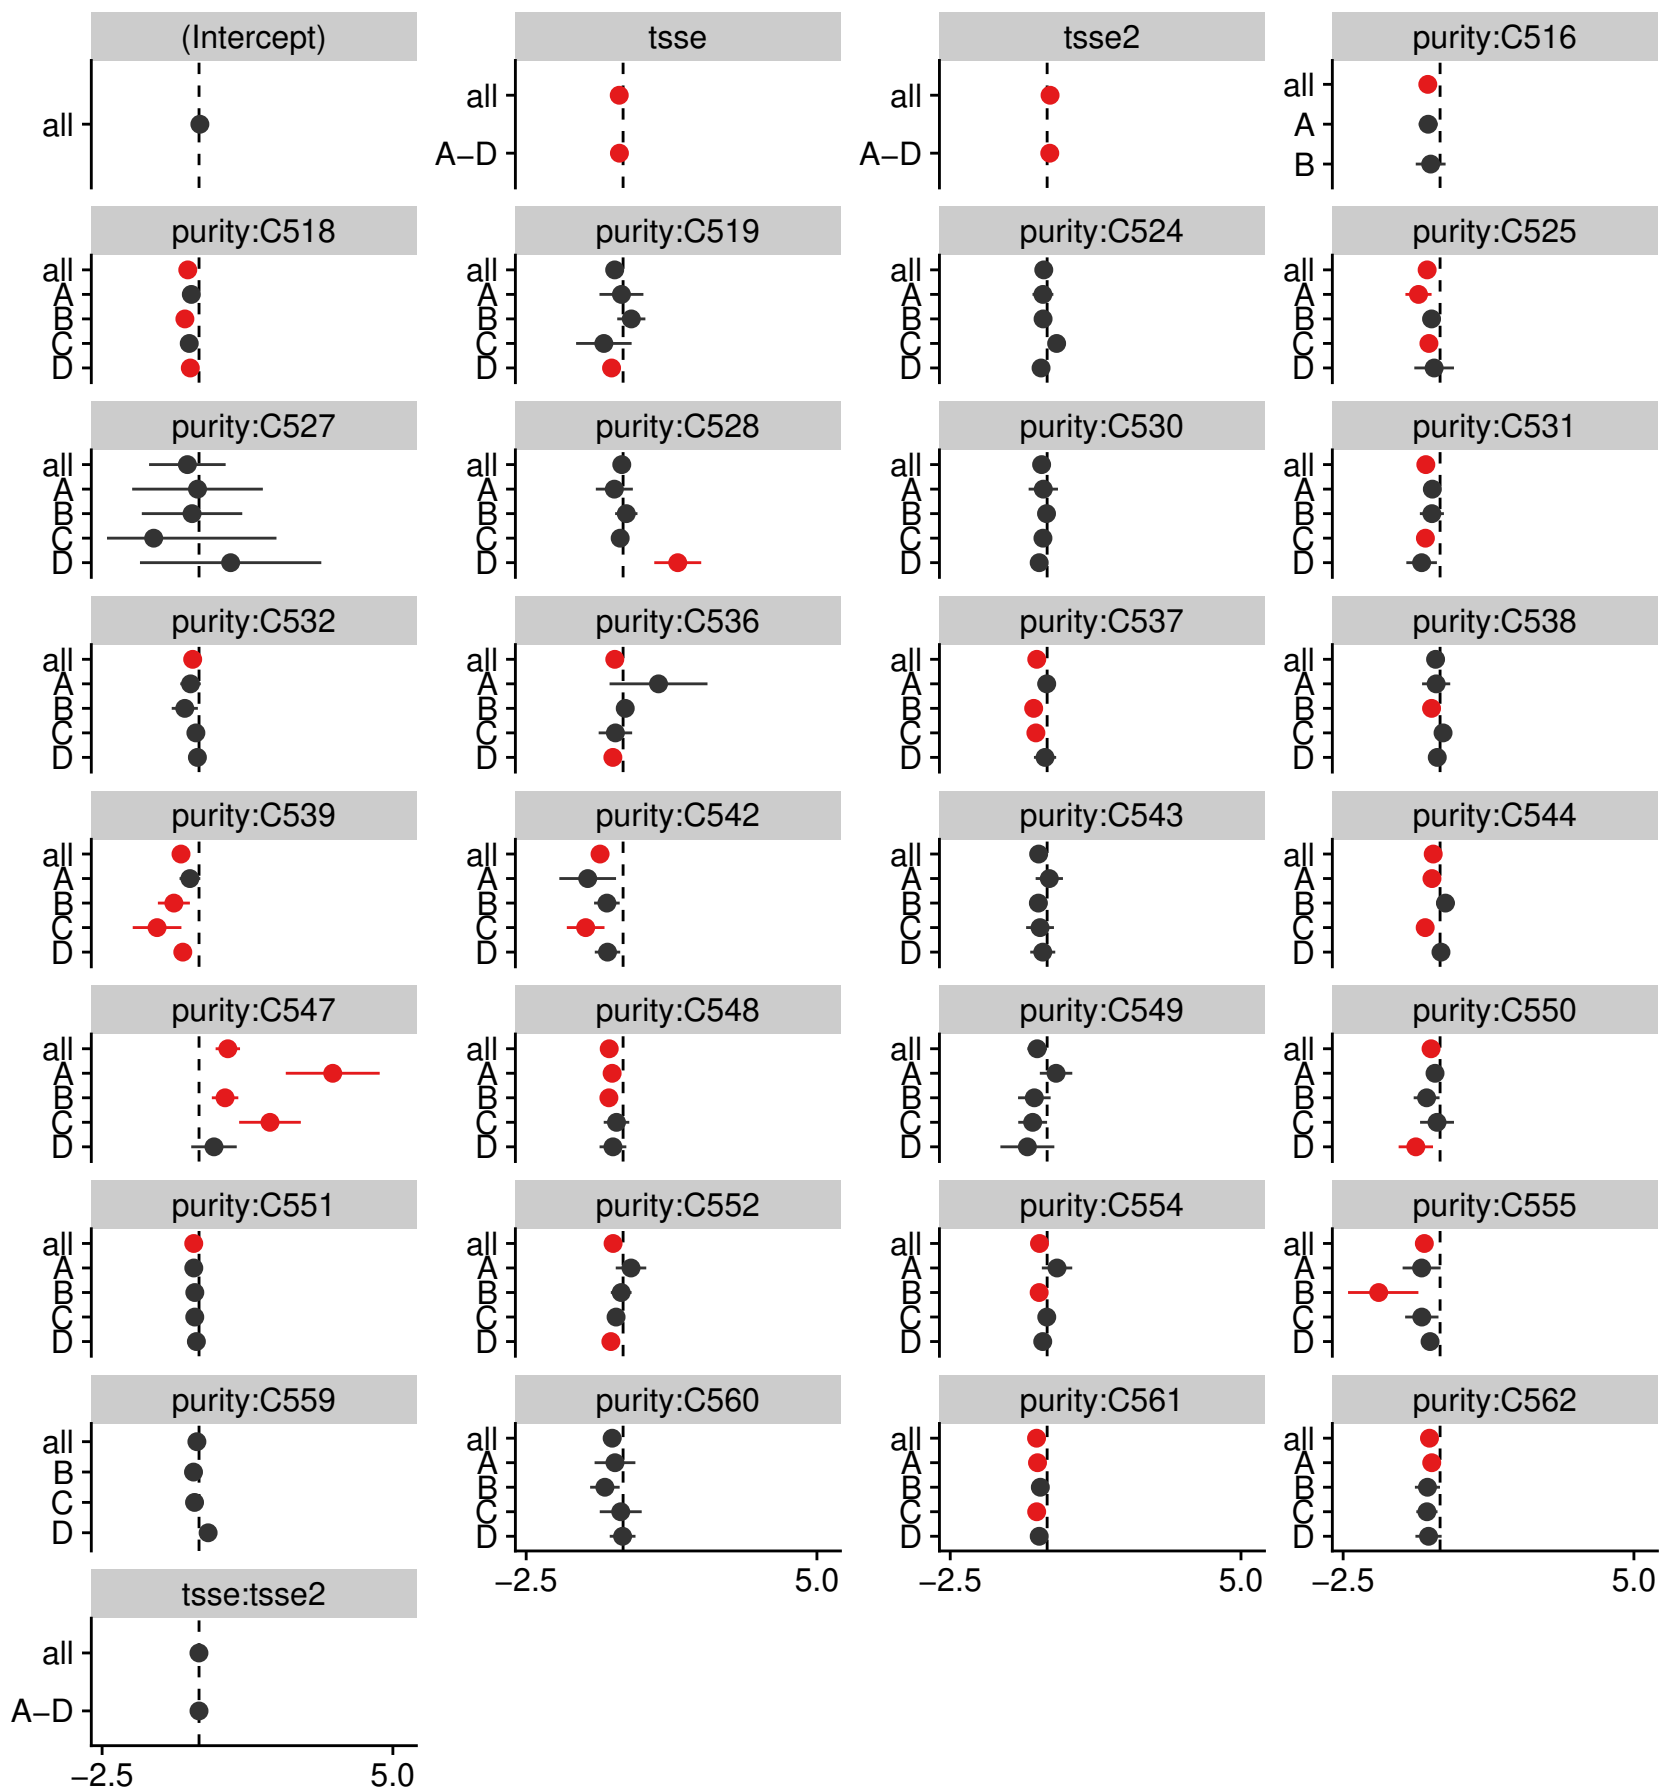

p\_c = < 2.22e-16, p\_sc = 4.2494e-09

# SPIB\_uc\_cTSS\_oPEAK

+ 3/33 (7/116), - 24/33 (19/116)

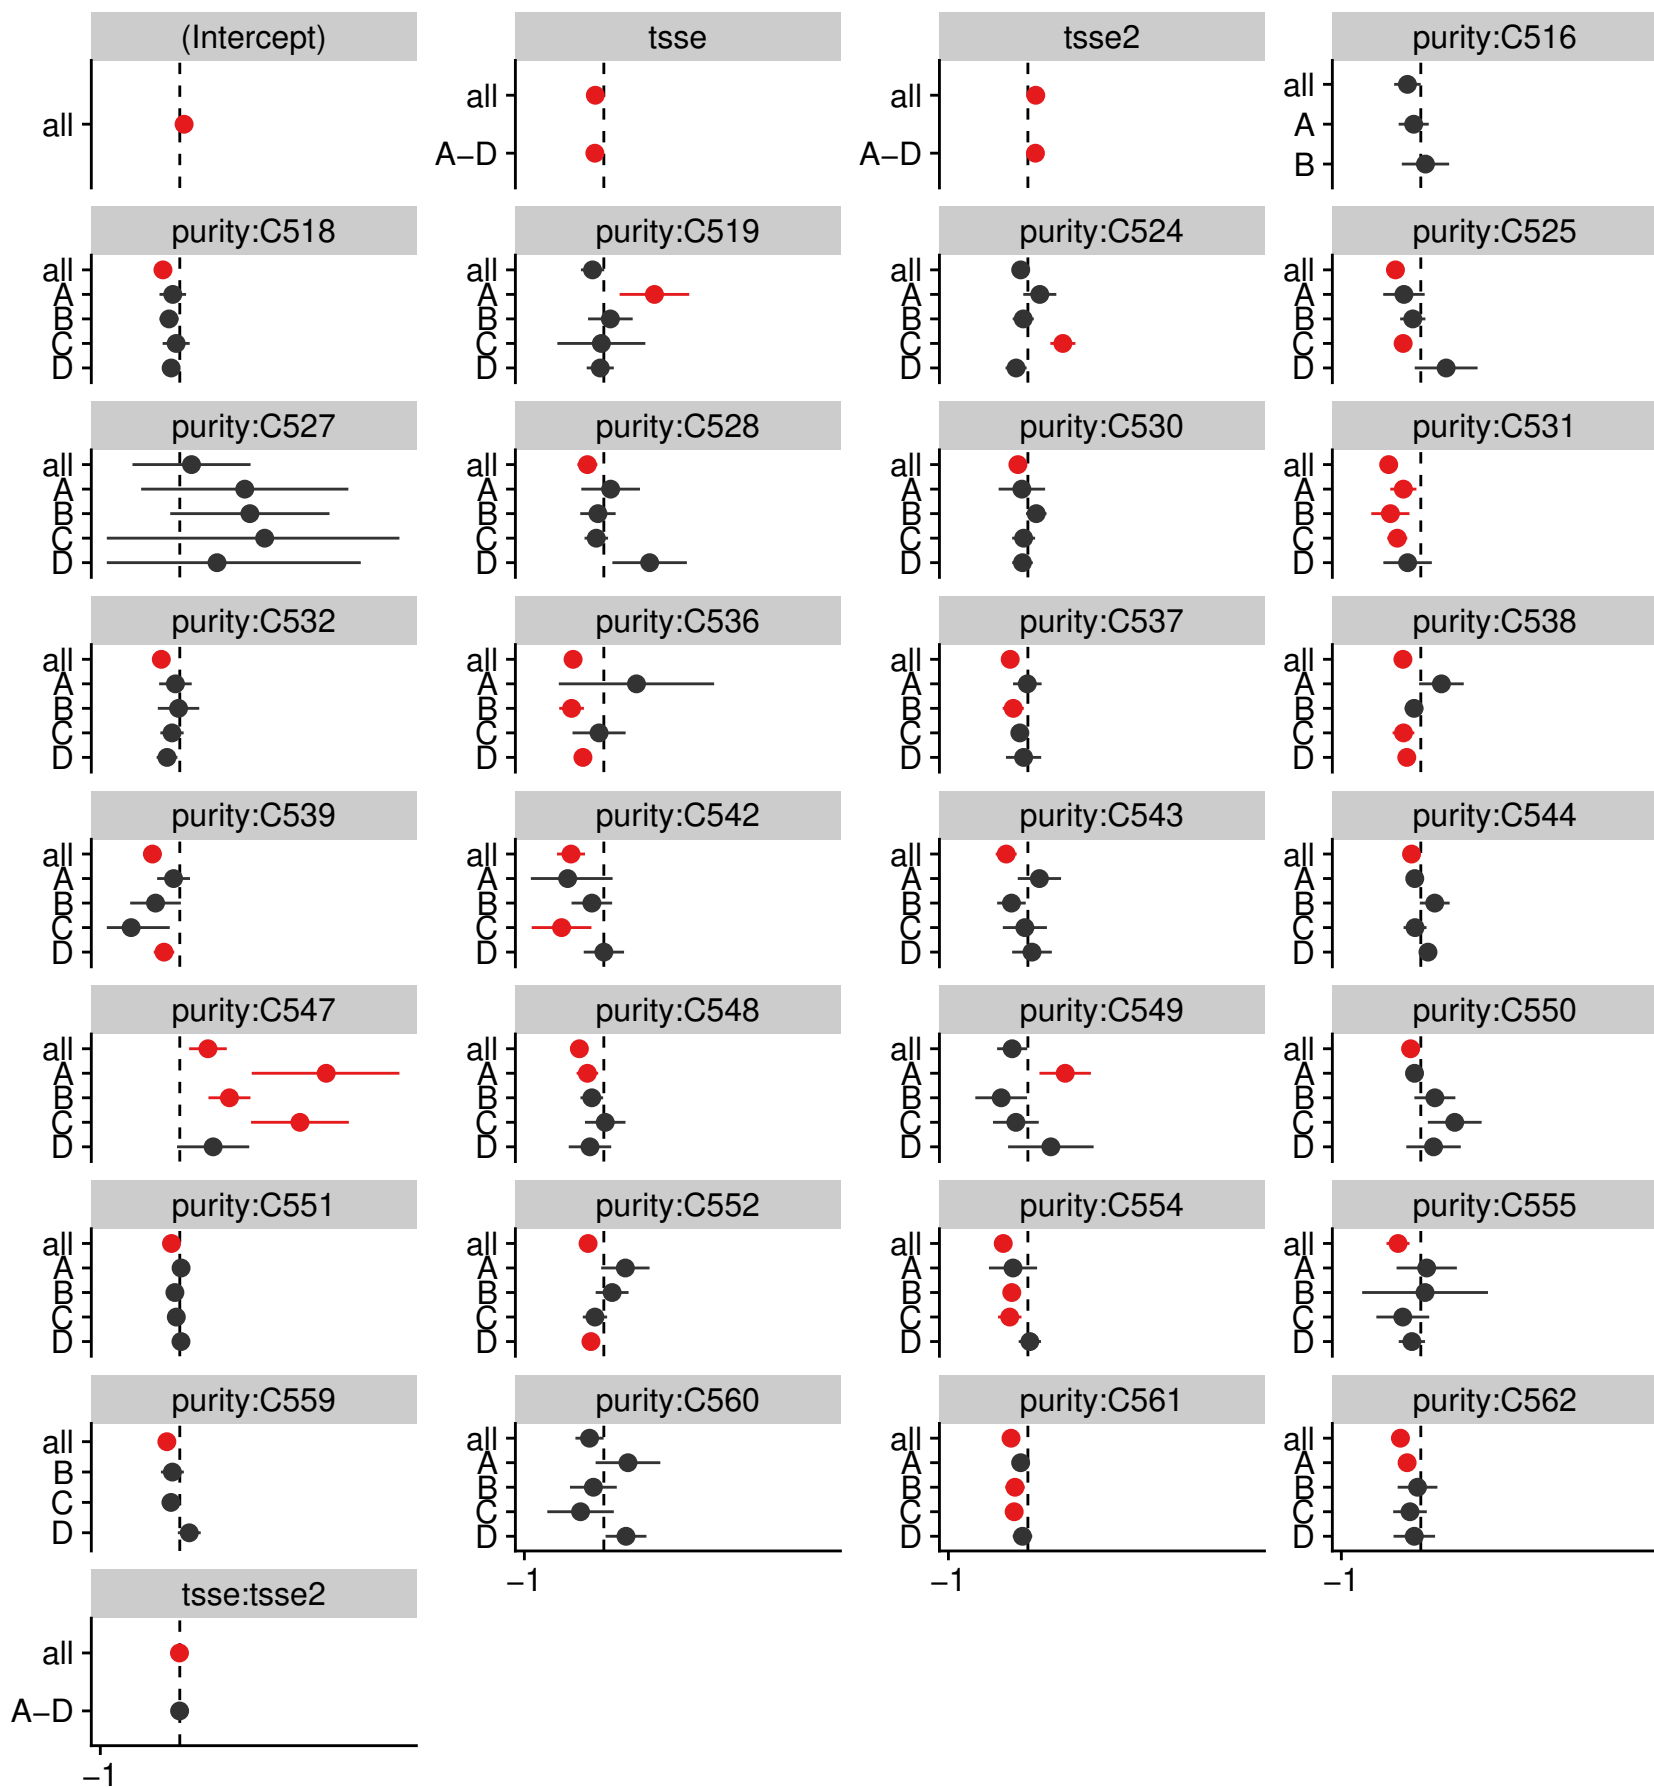

Coefficient

p\_c = < 2.22e-16, p\_sc = 0.00025535

# SPIB\_uc\_dTSS\_nPEAK

+ 1/33 (5/116), - 23/33 (36/116)

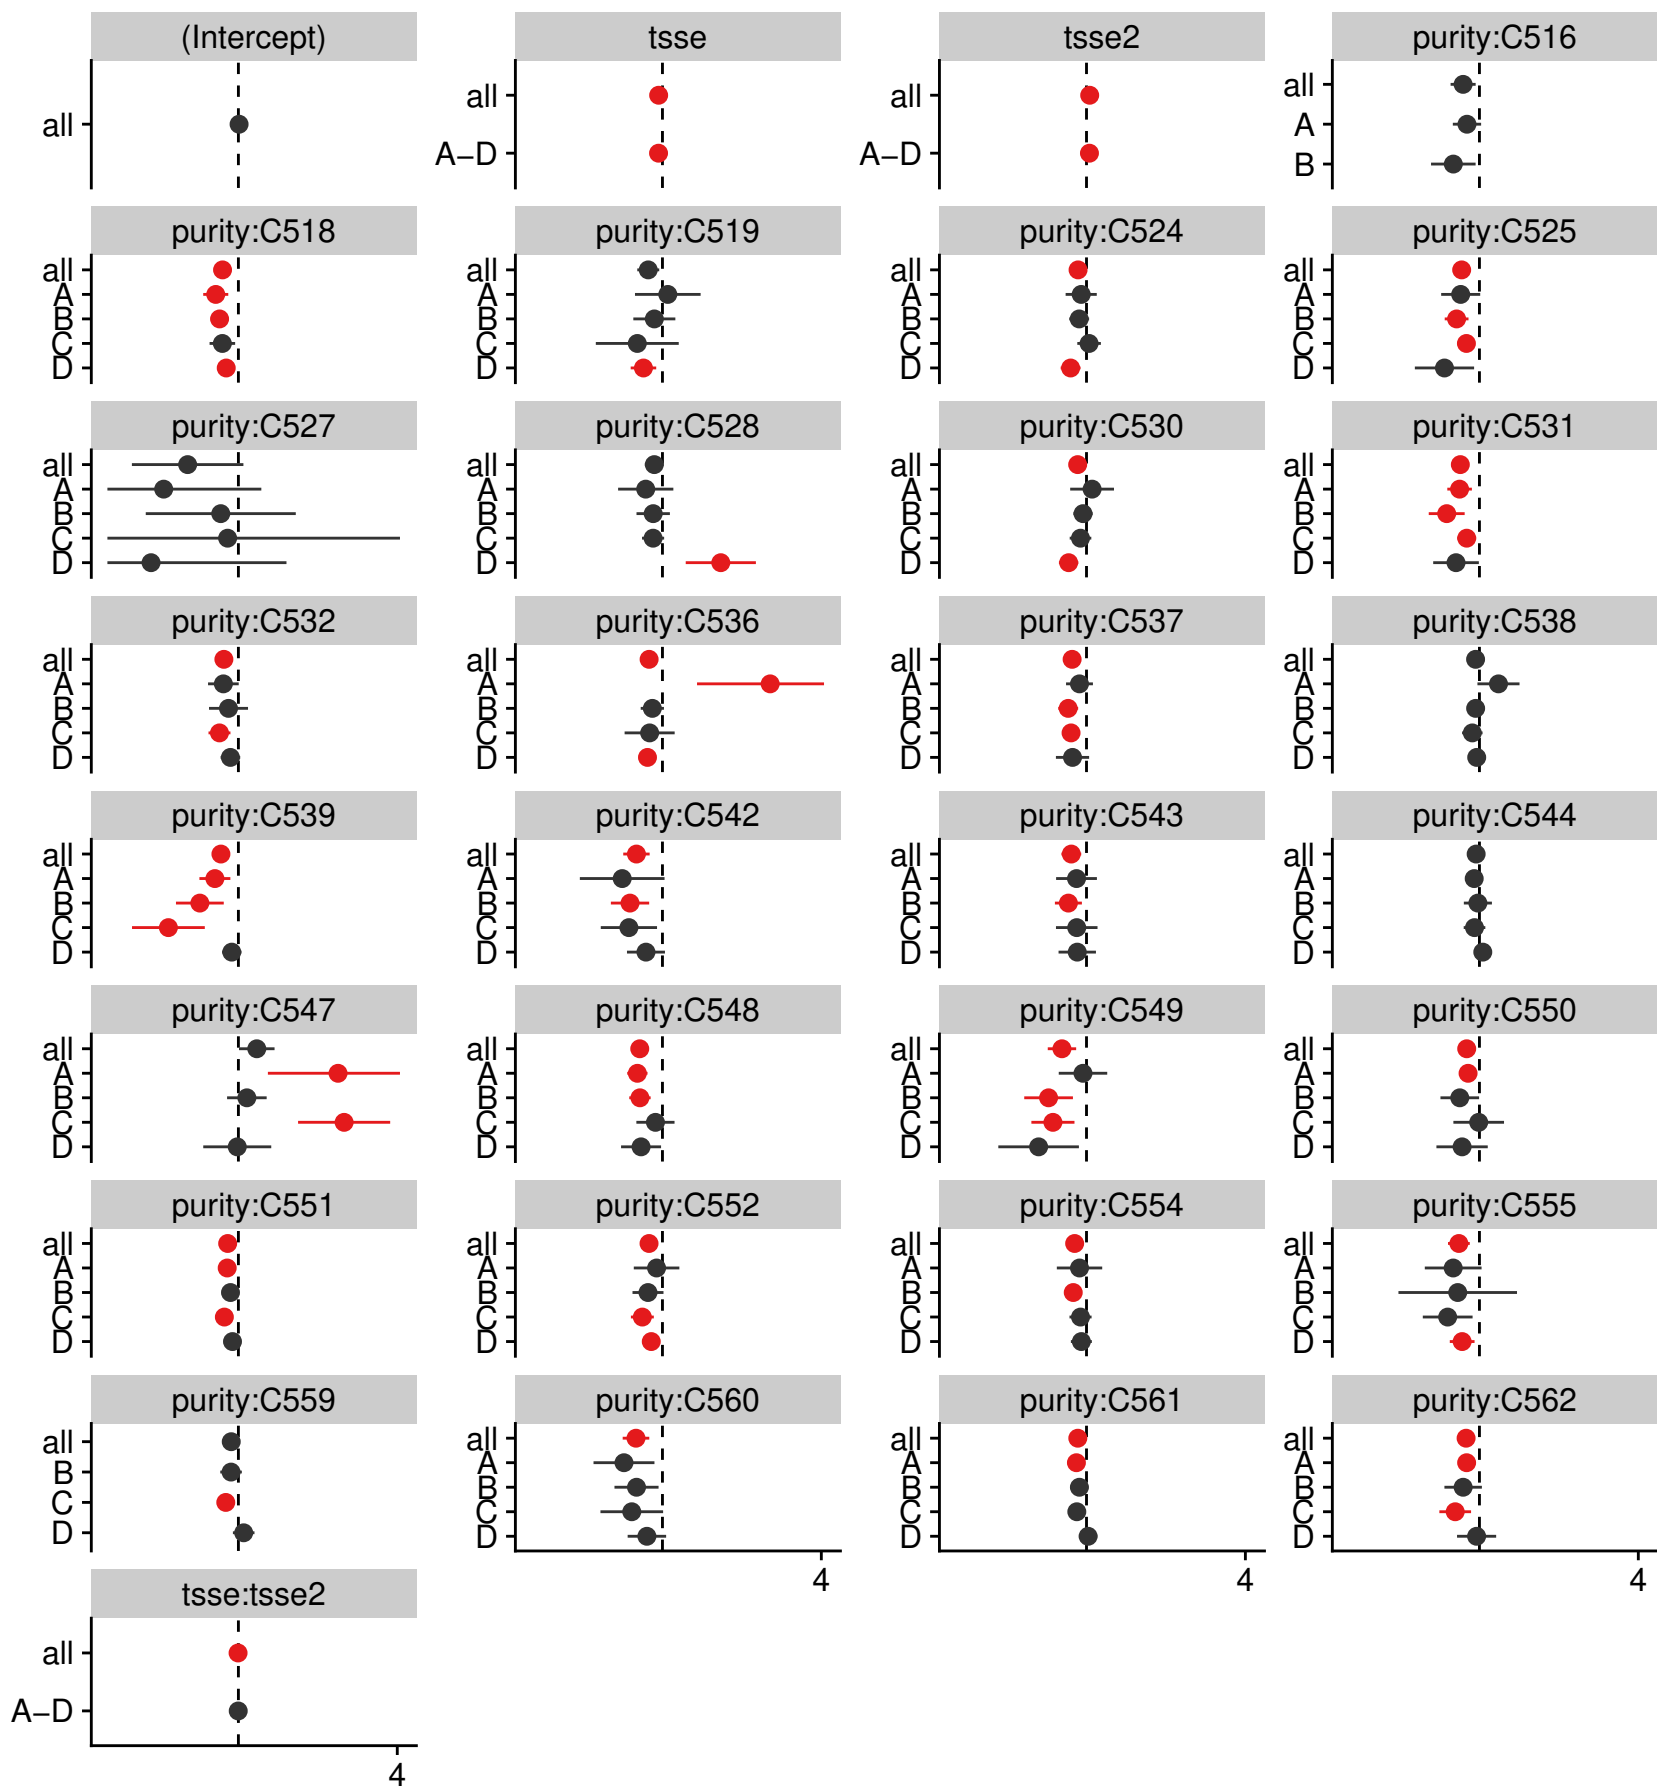

Coefficient

p\_c = < 2.22e-16, p\_sc = 0.00010661

$+ 3/33 \text{ (7/116)}, - 23/33 \text{ (37/116)}$ 

$p_c = < 2.22e-16$ ,  $p_{sc} = 4.2316e-05$

# SPIB\_uc\_pTSS\_nPEAK

+ 2/33 (5/116), - 14/33 (6/116)

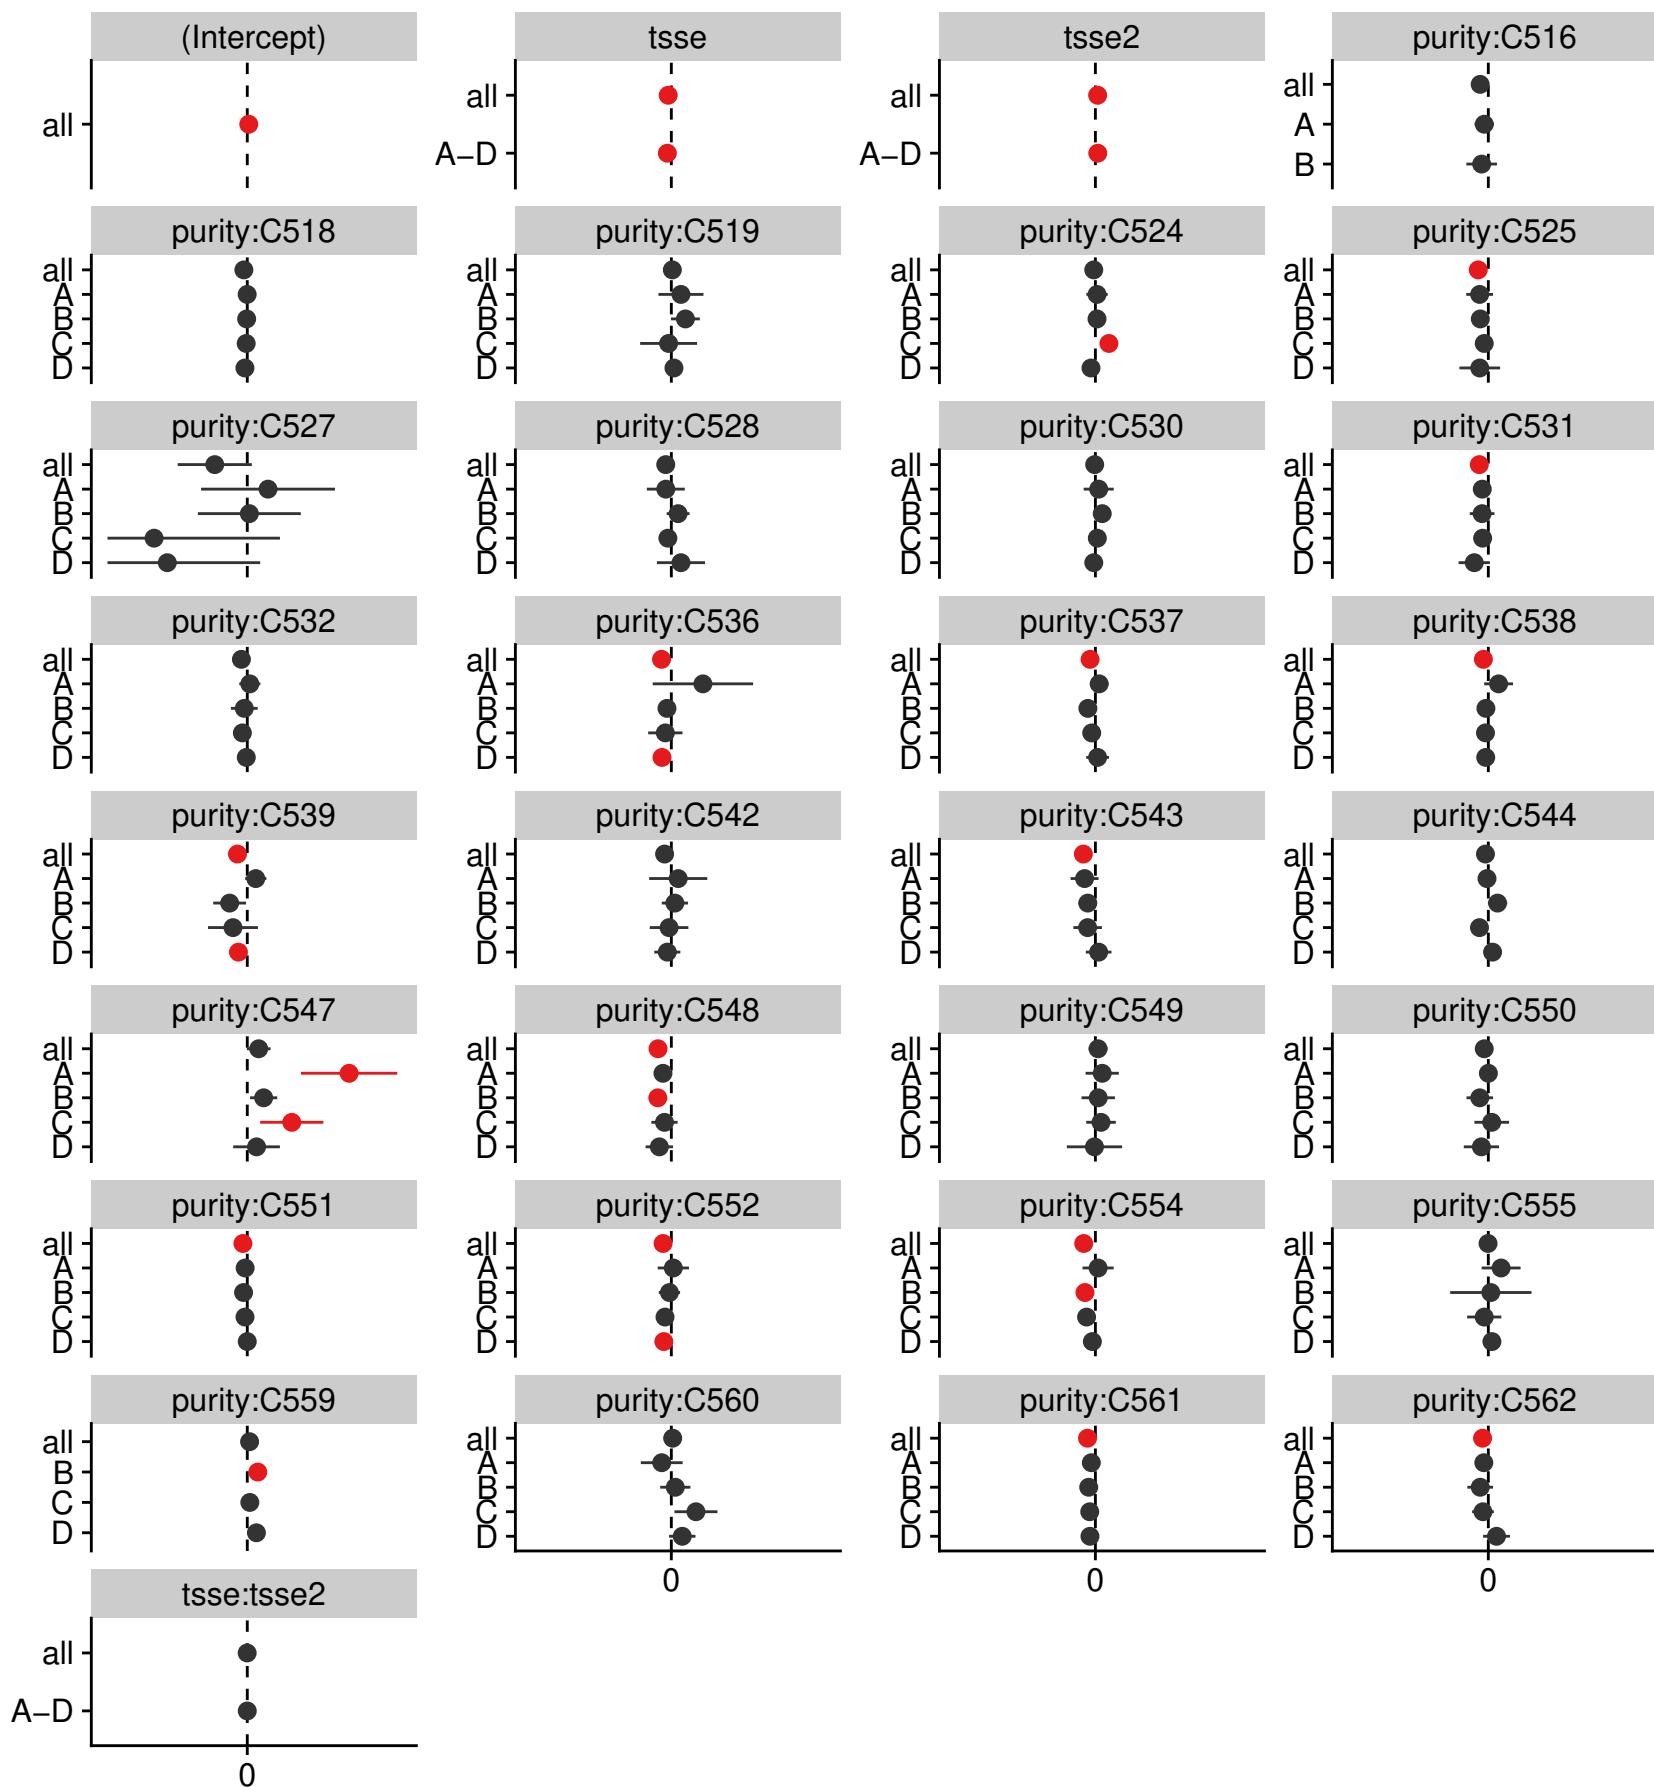

p\_c = < 2.22e-16, p\_sc = 0.31014



# SPIB\_uc\_pTSS\_oPEAK

+ 3/33 (10/116), - 19/33 (9/116)

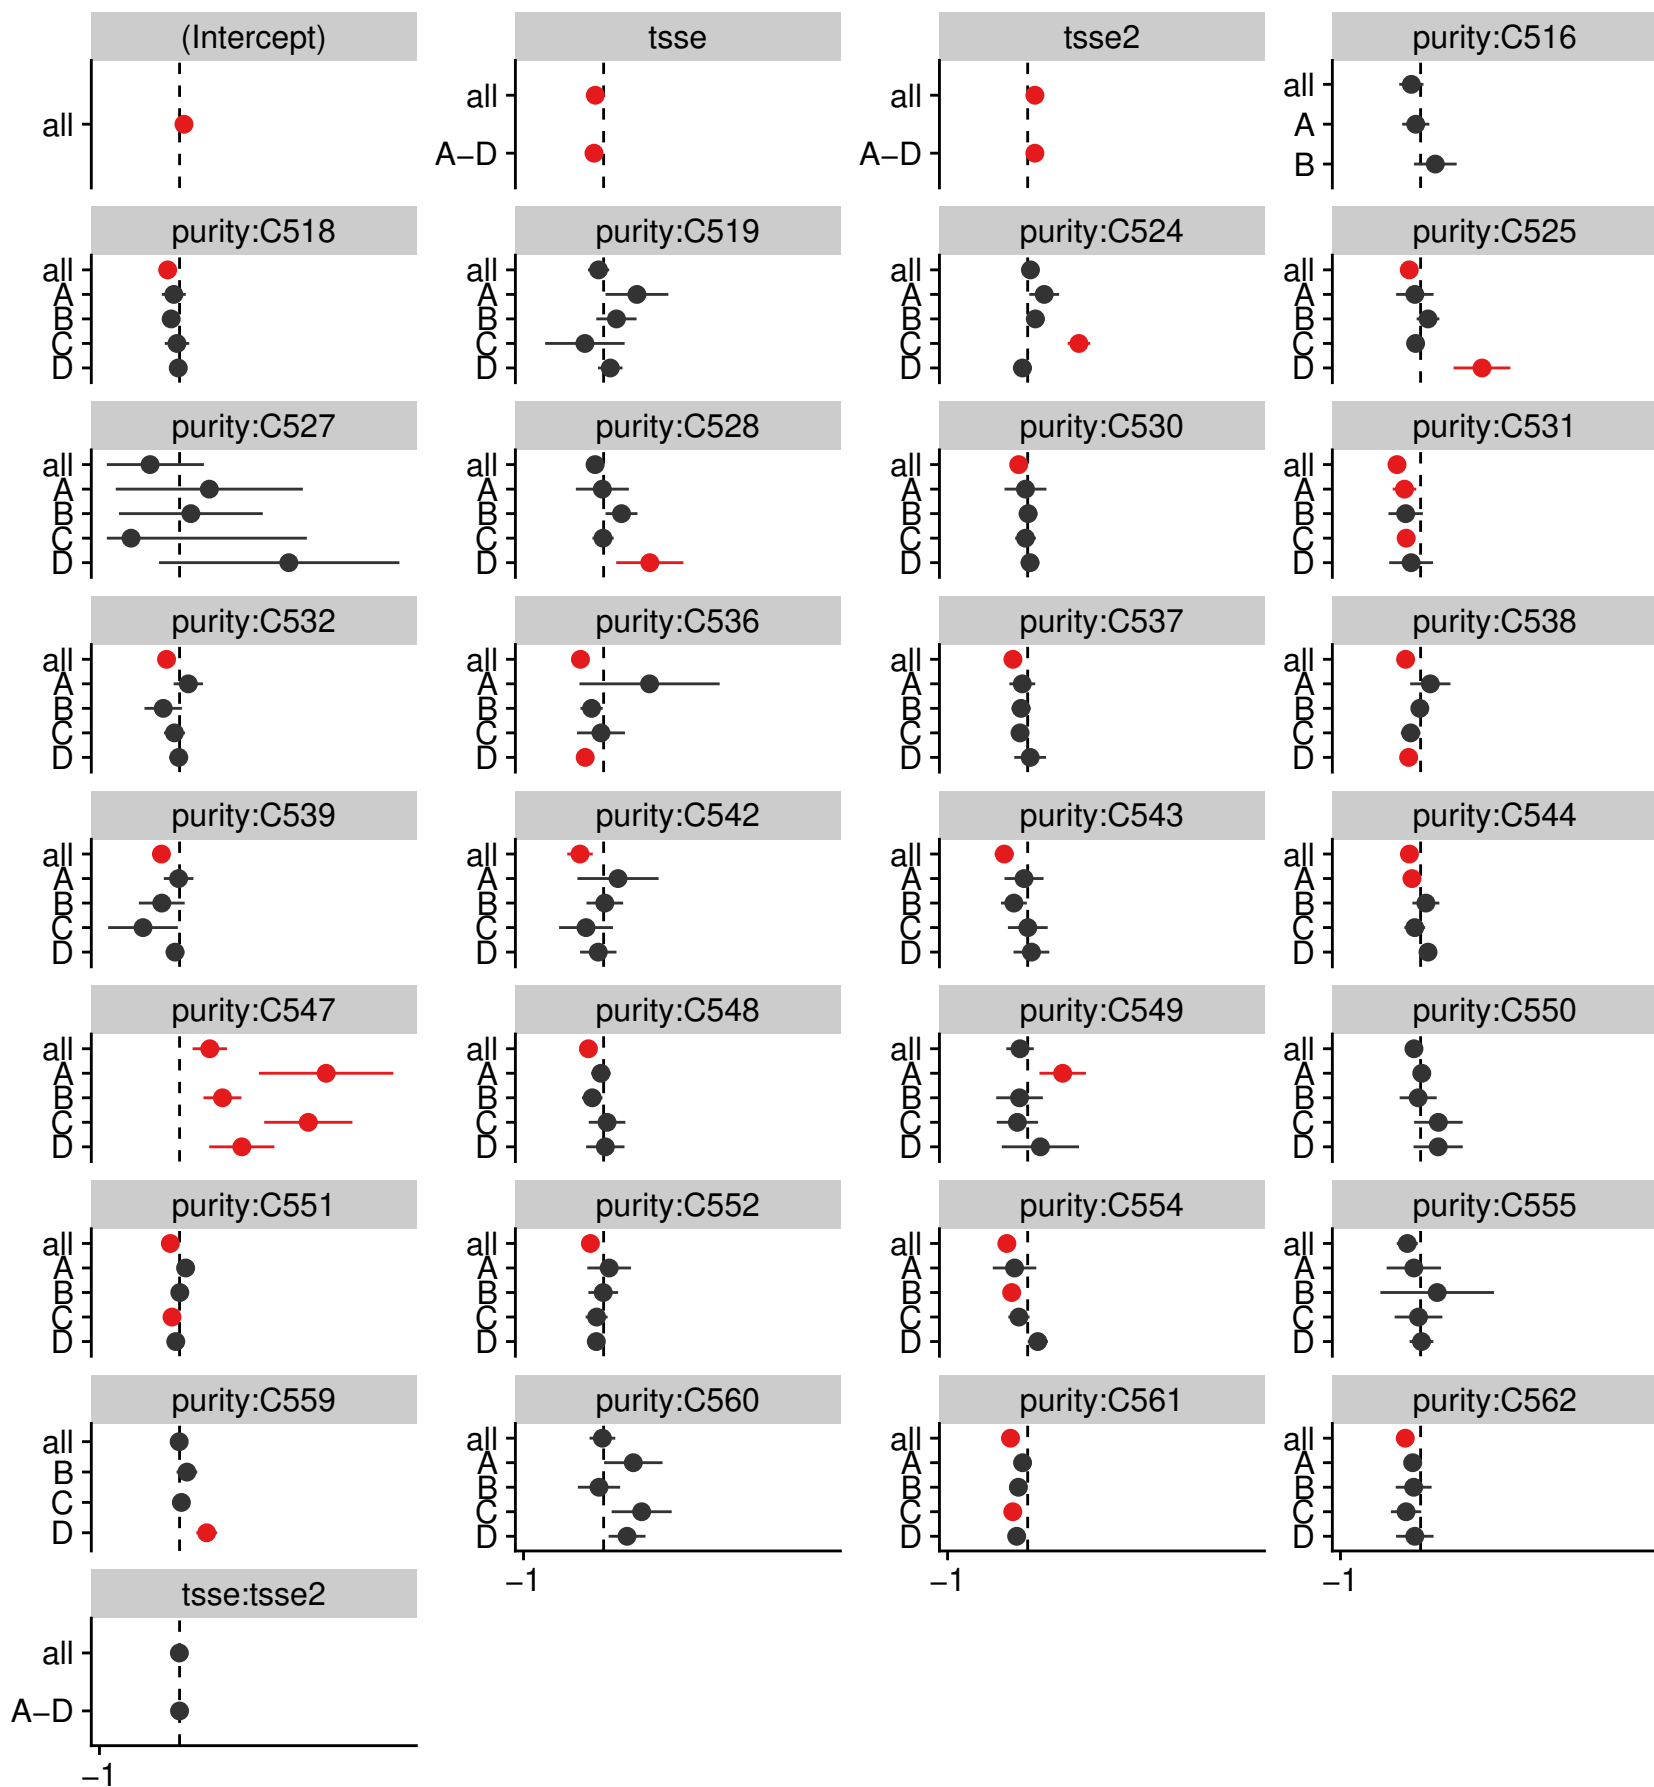

Coefficient

p\_c = < 2.22e-16, p\_sc = 5.3305e-06

# SPIC\_uc\_cTSS\_nPEAK

+ 2/33 (4/116), - 18/33 (25/116)

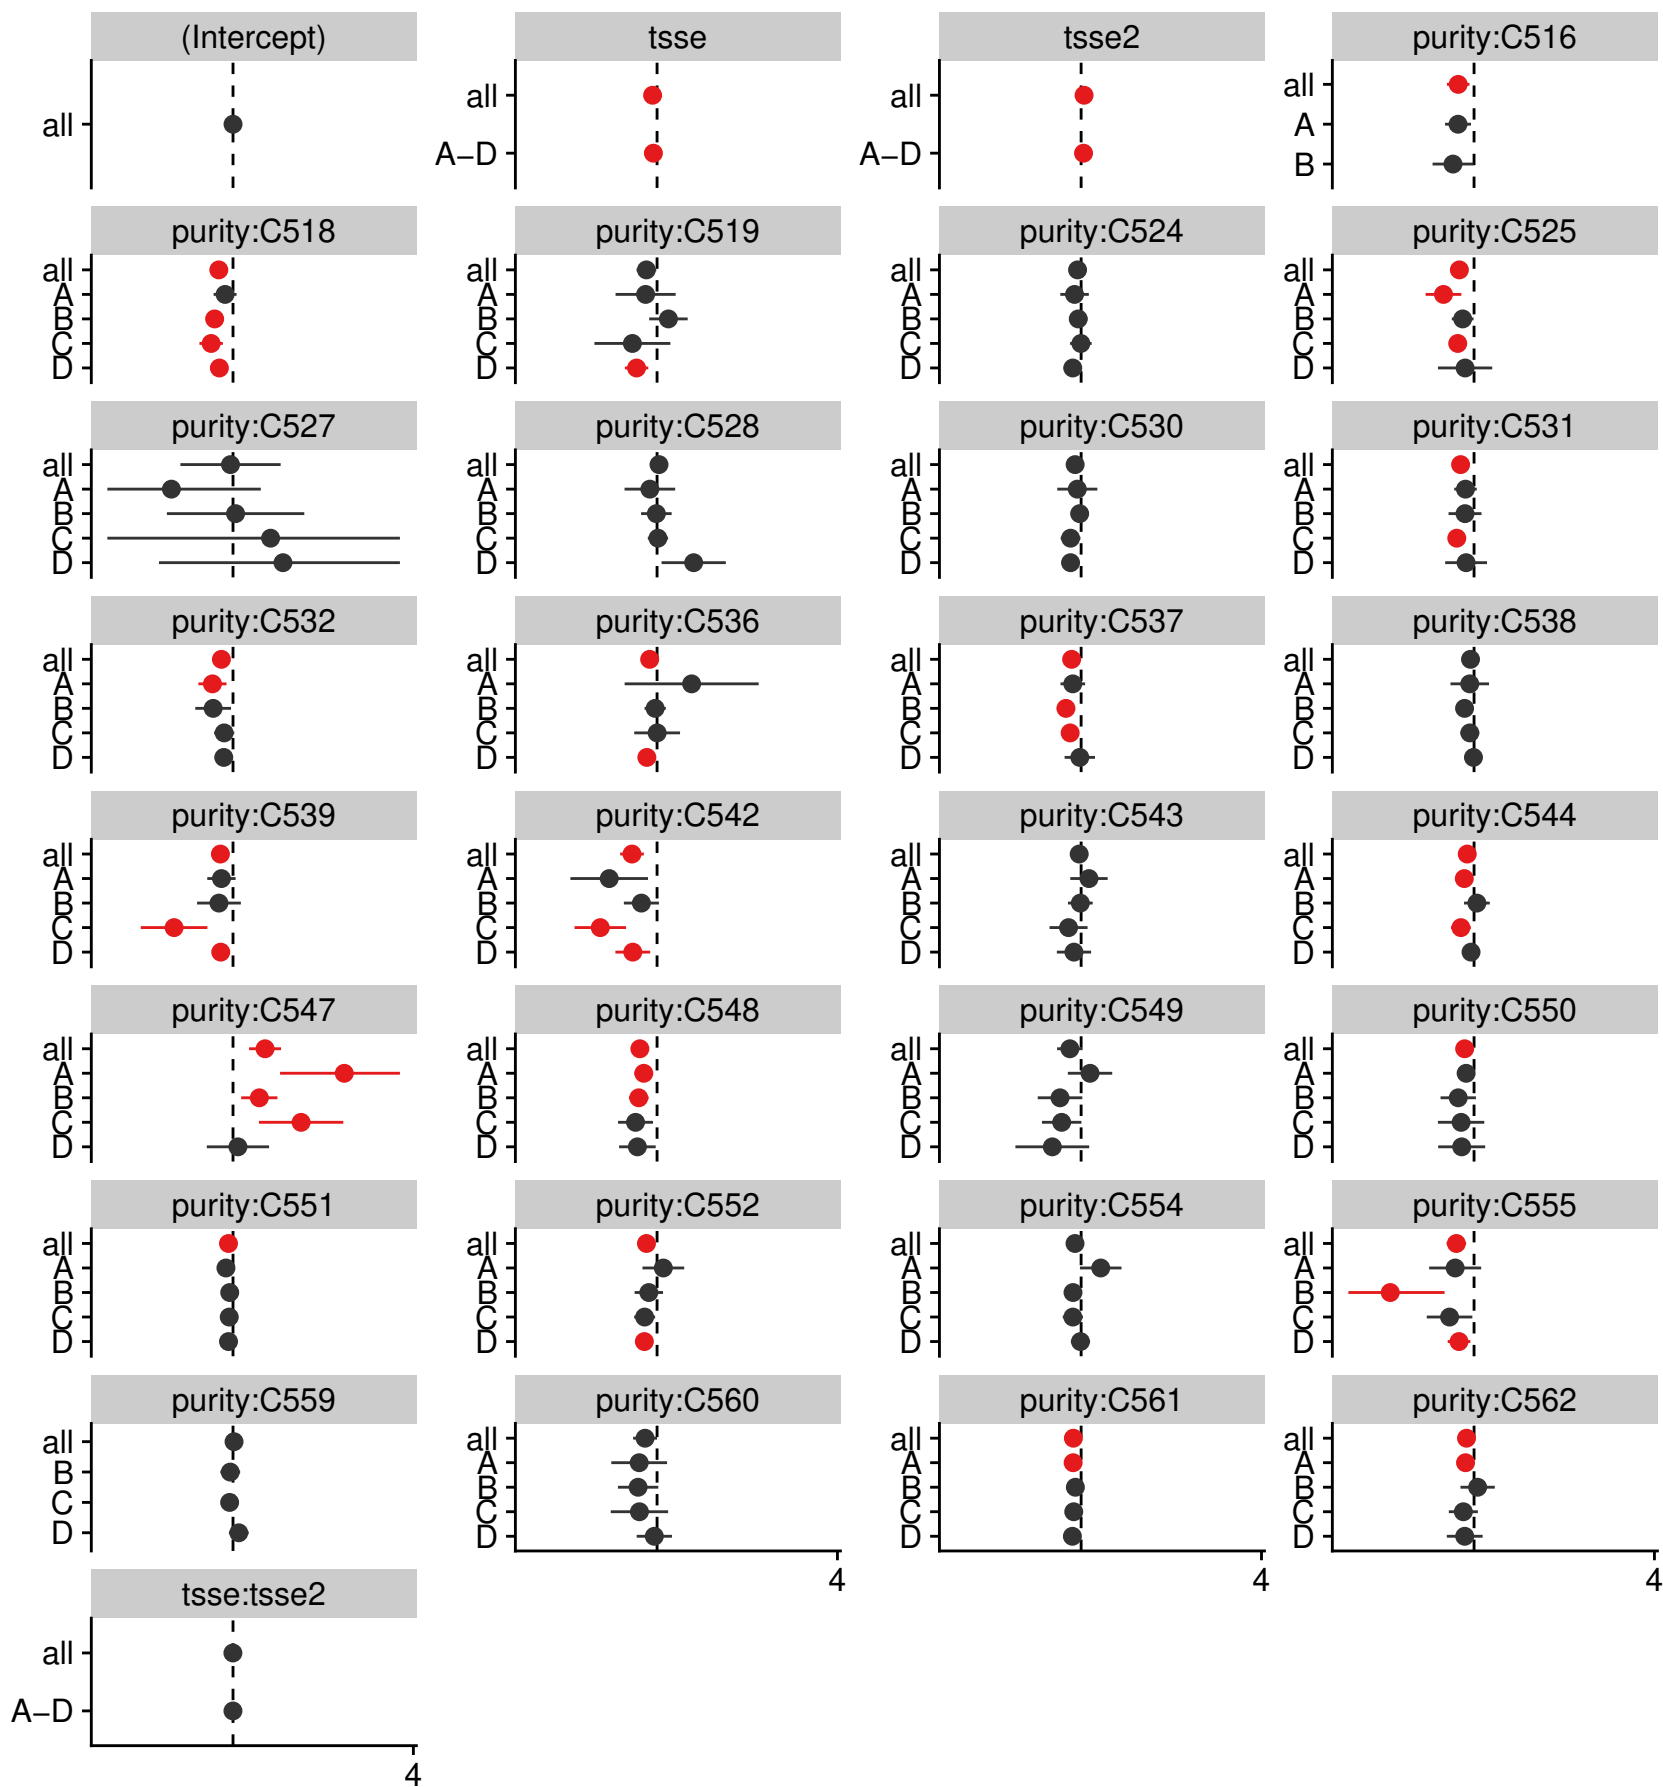

Coefficient

$p_c = < 2.22e-16$ ,  $p_{sc} = 0.026066$

# SPIC\_uc\_cTSS\_oPEAK

+ 2/33 (4/116), - 22/33 (18/116)

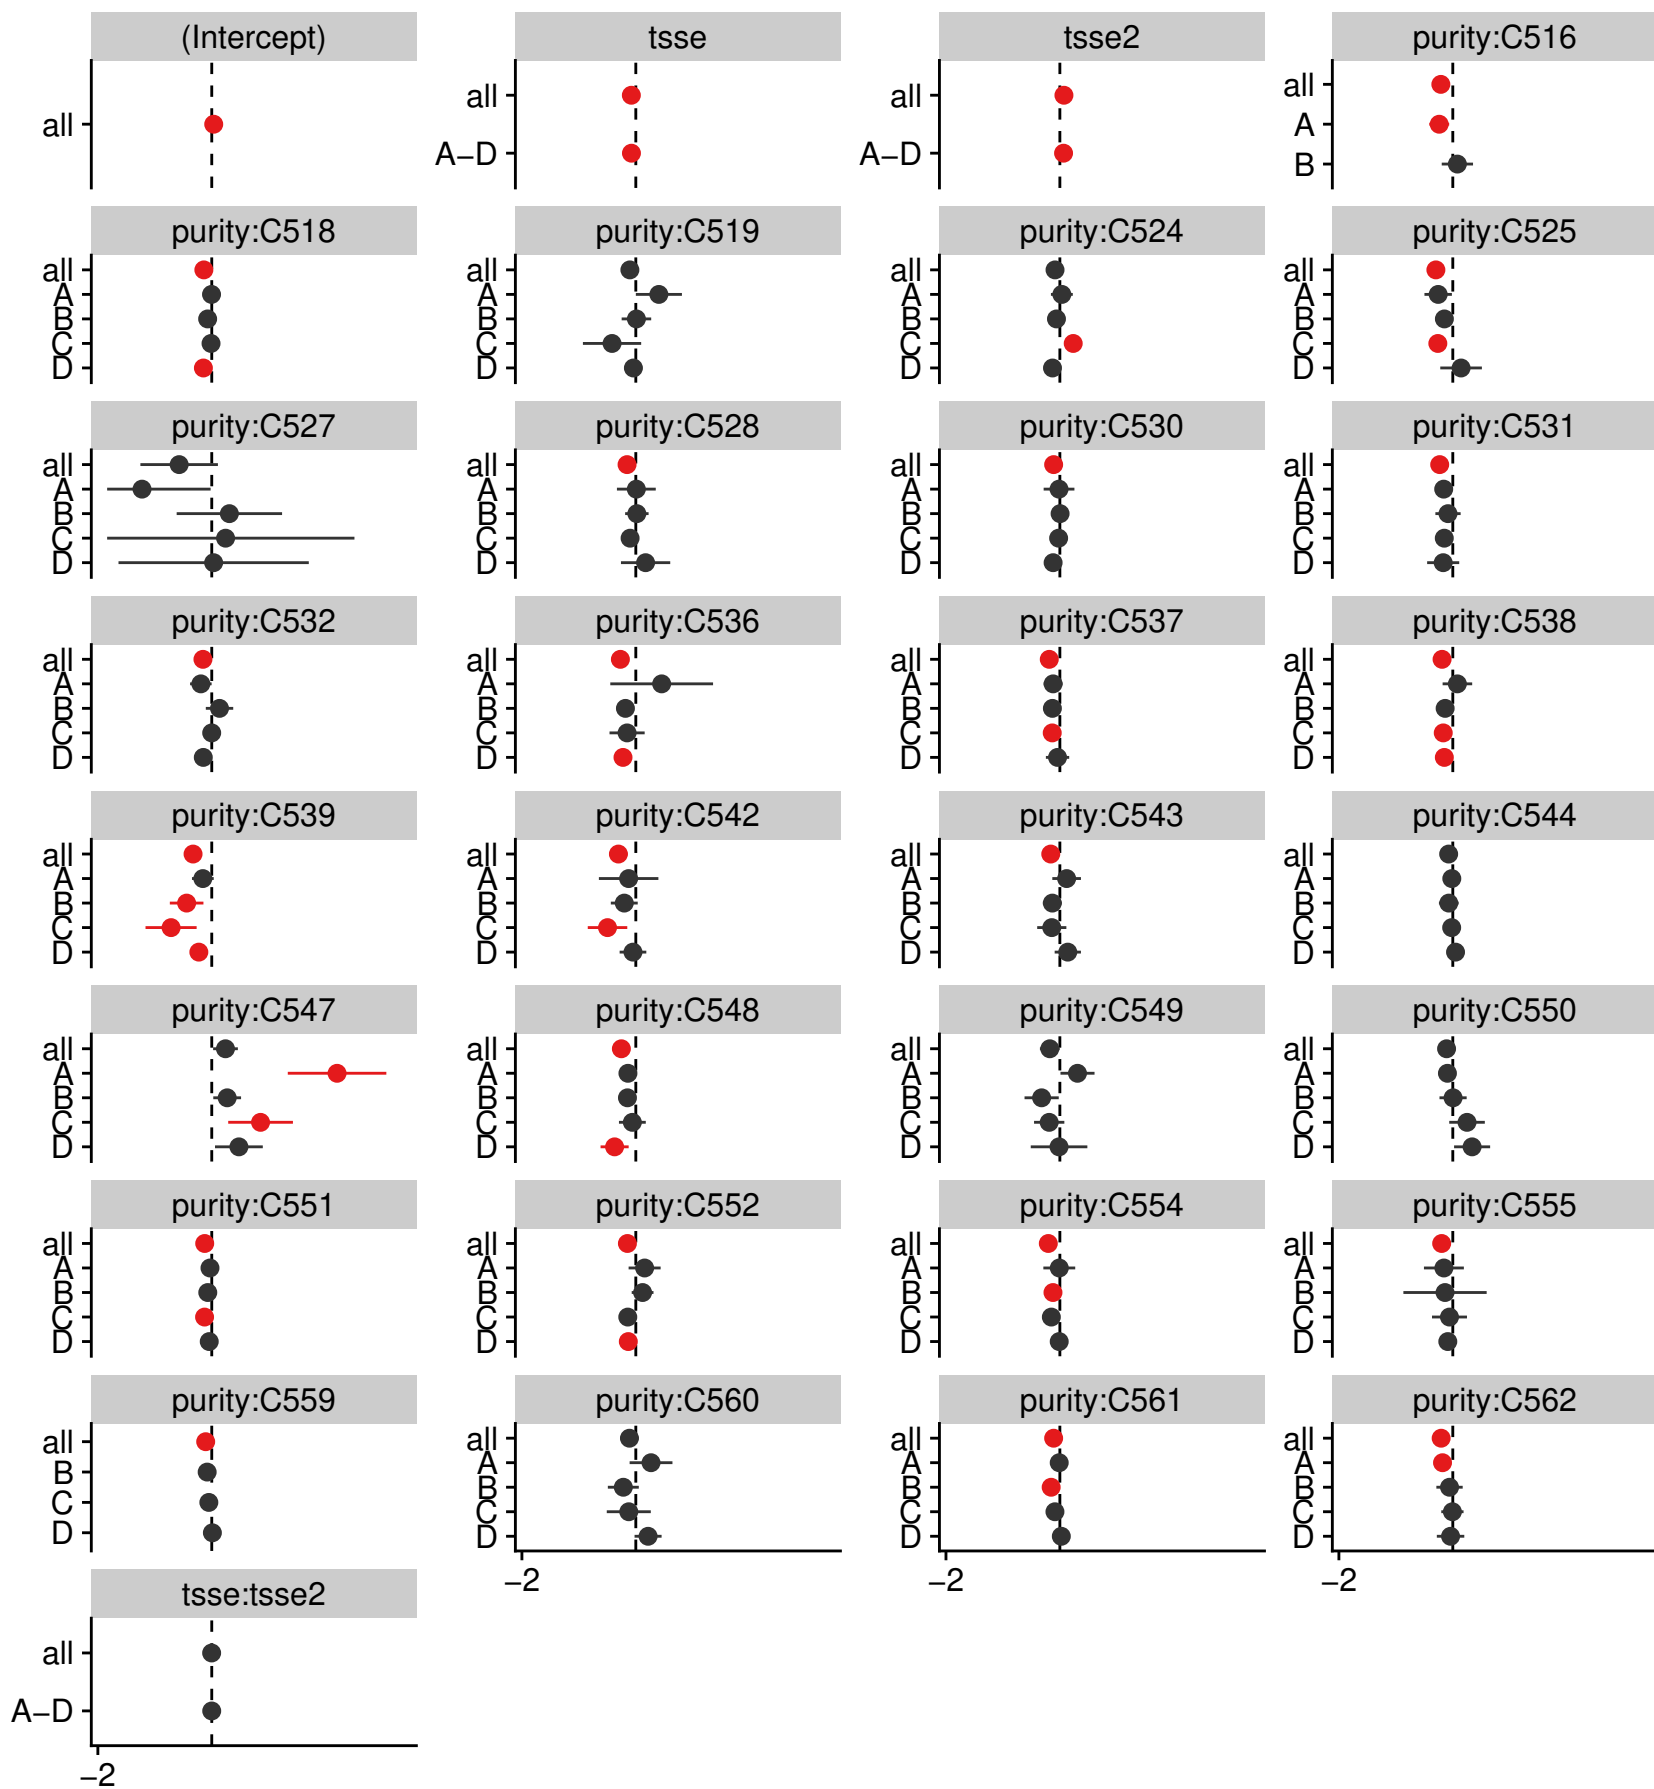

Coefficient

$p_c = < 2.22e-16$ ,  $p_{sc} = 0.0029775$

# SPIC\_uc\_dTSS\_nPEAK

+ 2/33 (3/116), - 23/33 (49/116)

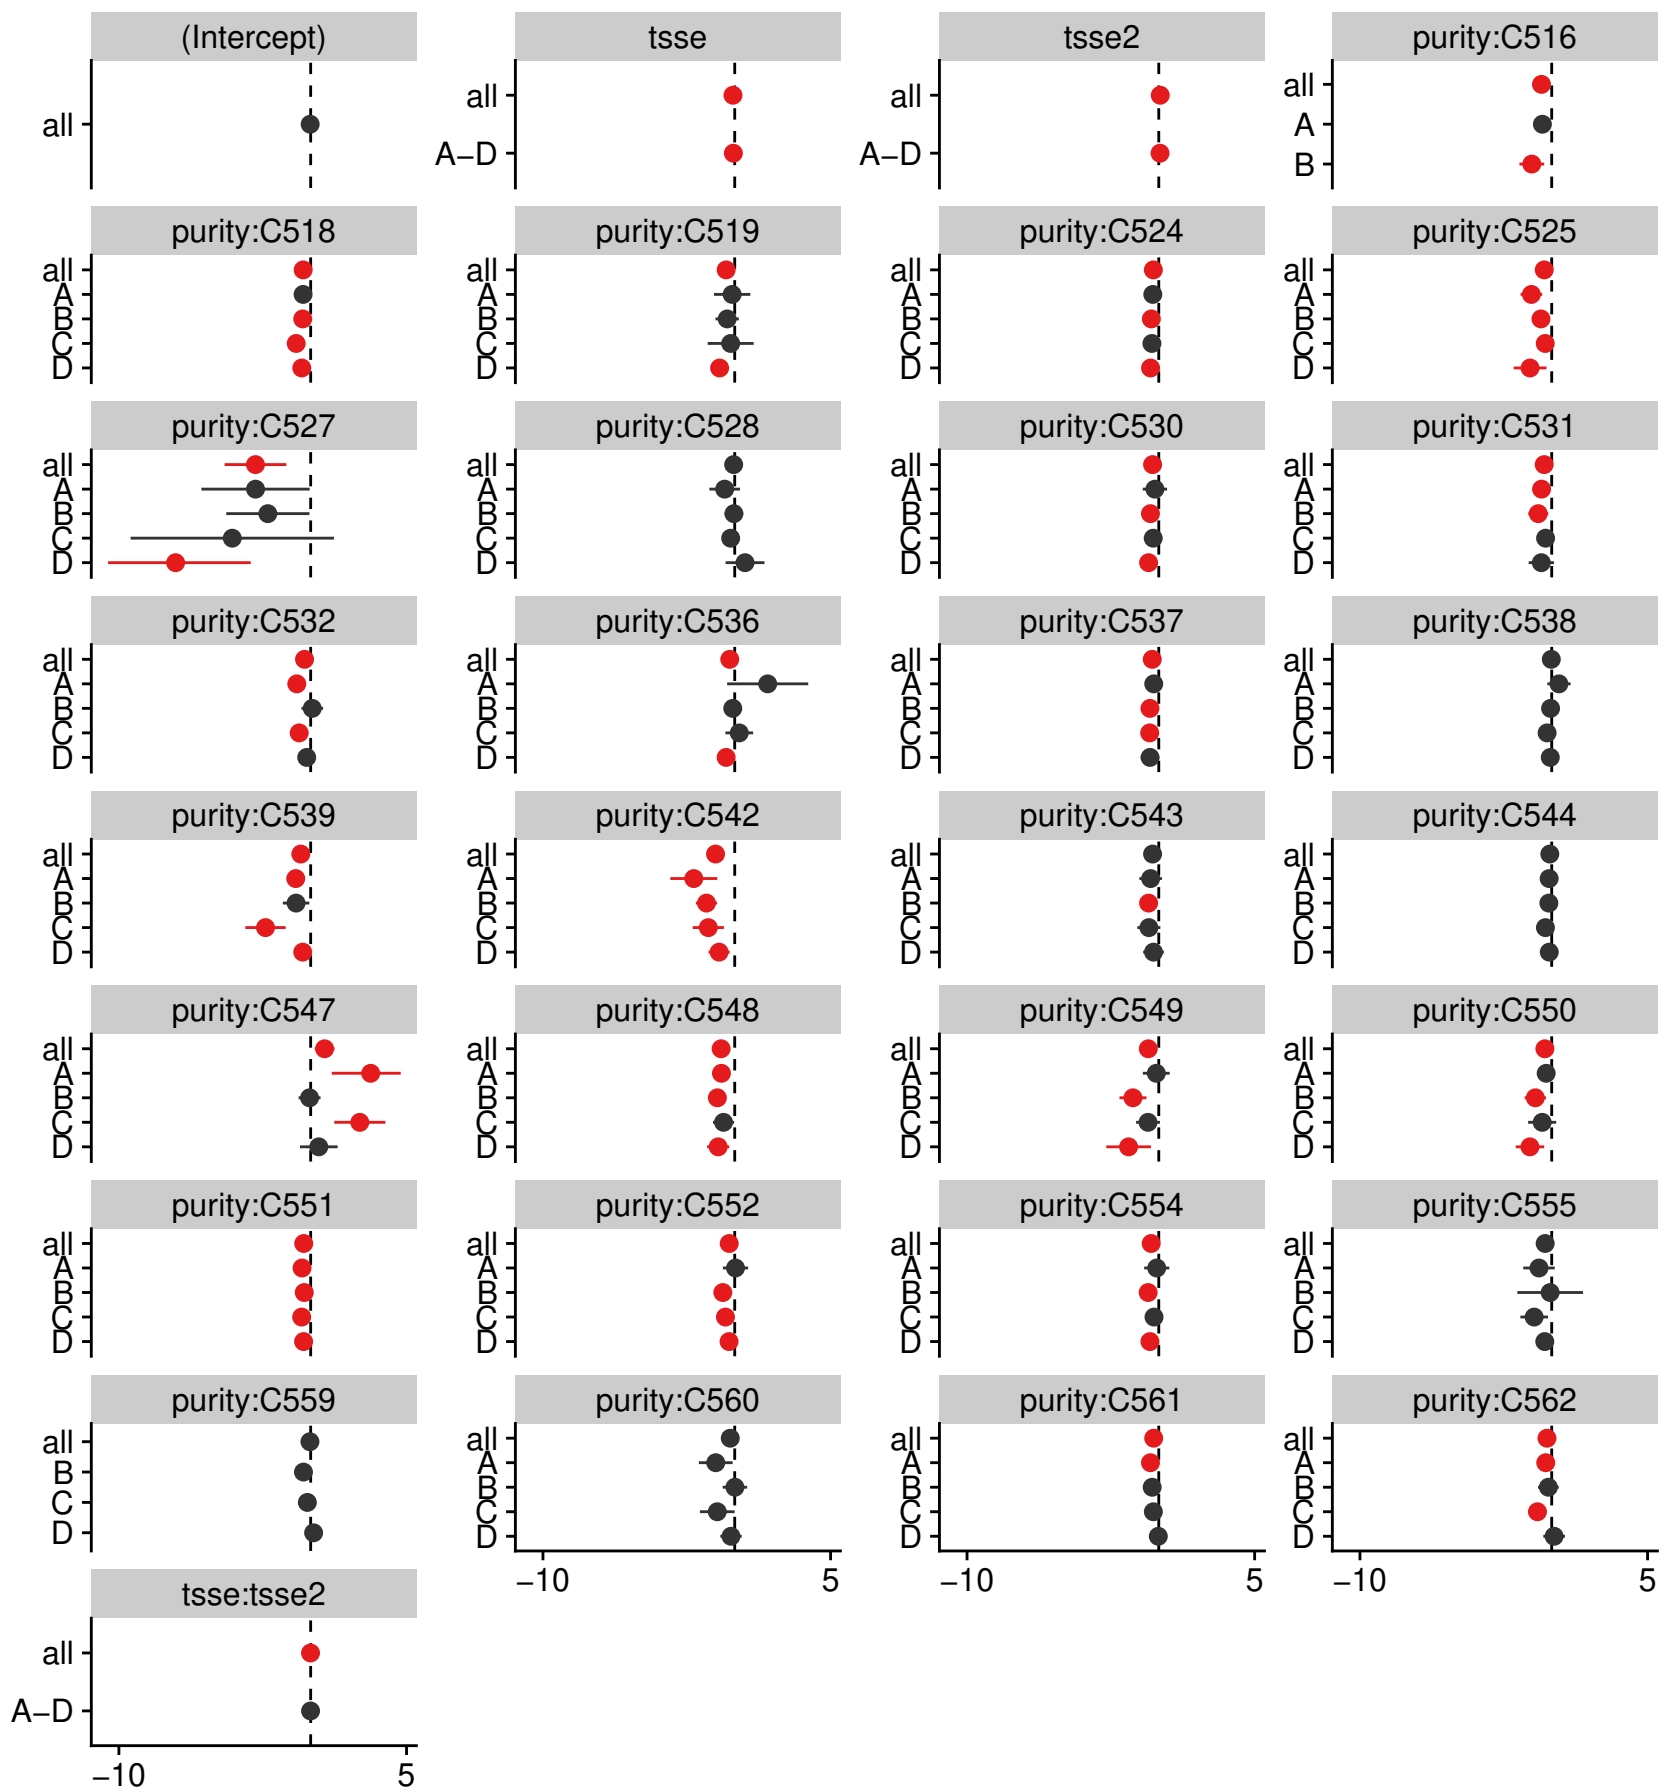

p\_c = < 2.22e-16, p\_sc = 0.00016434

# SPIC\_uc\_dTSS\_oPEAK

+ 2/33 (3/116), - 15/33 (25/116)

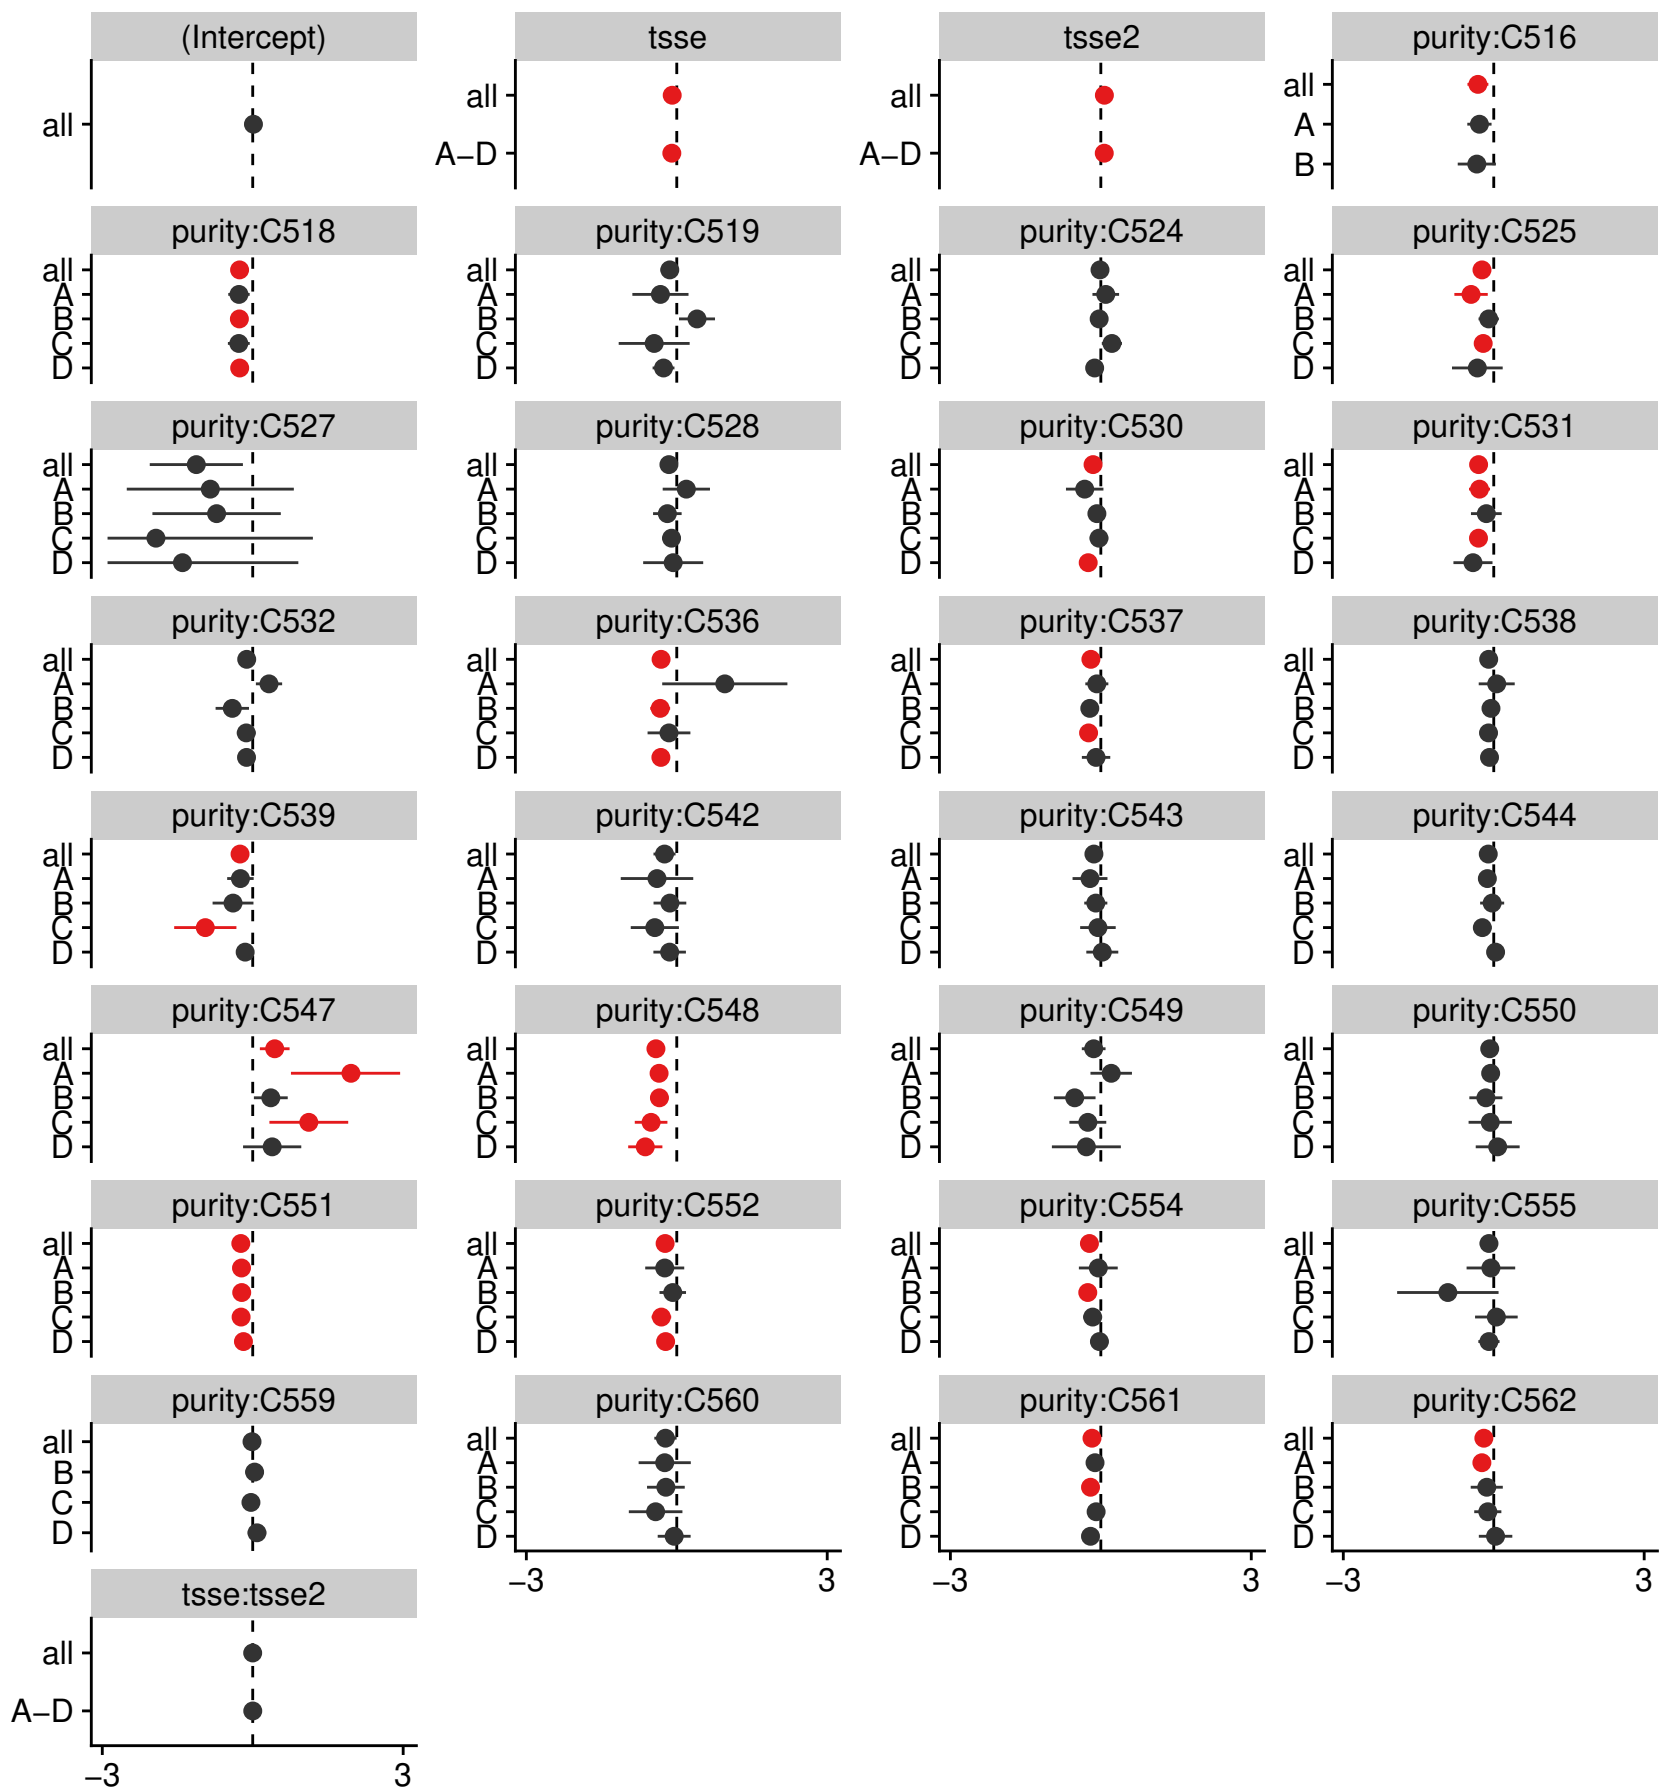

p\_c = < 2.22e-16, p\_sc = 0.086182

# SPIC\_uc\_pTSS\_oPEAK

+ 1/33 (3/116), - 18/33 (20/116)

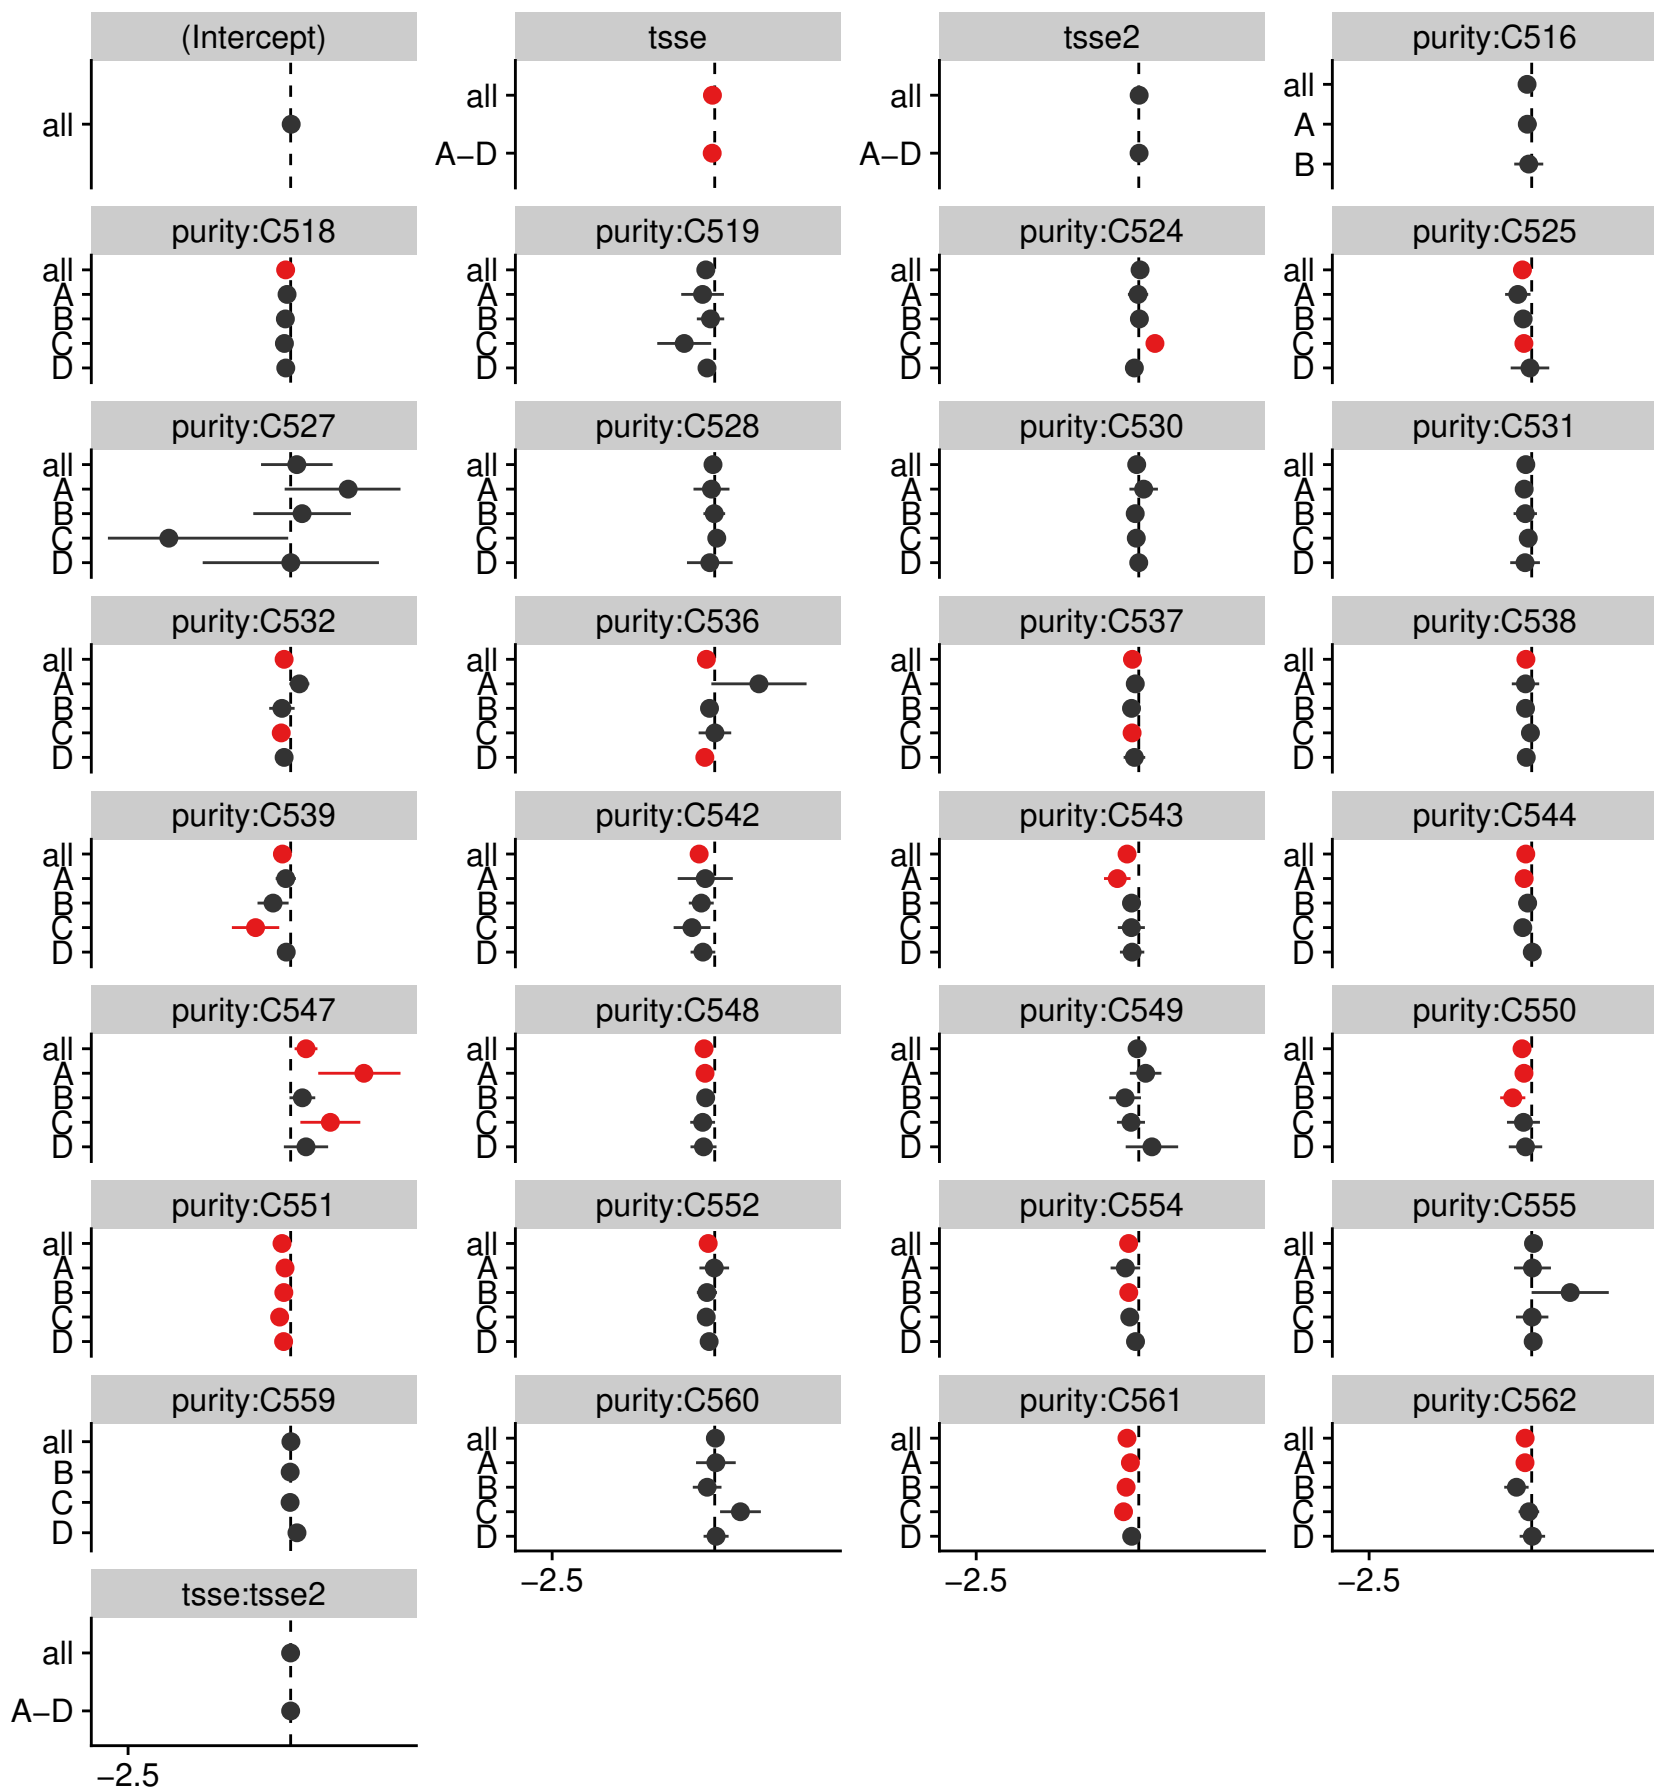

Coefficient

p\_c = < 2.22e-16, p\_sc = 0.0080147

# STAT2\_uc\_cTSS\_oPEAK

+ 1/33 (4/116), - 18/33 (31/116)

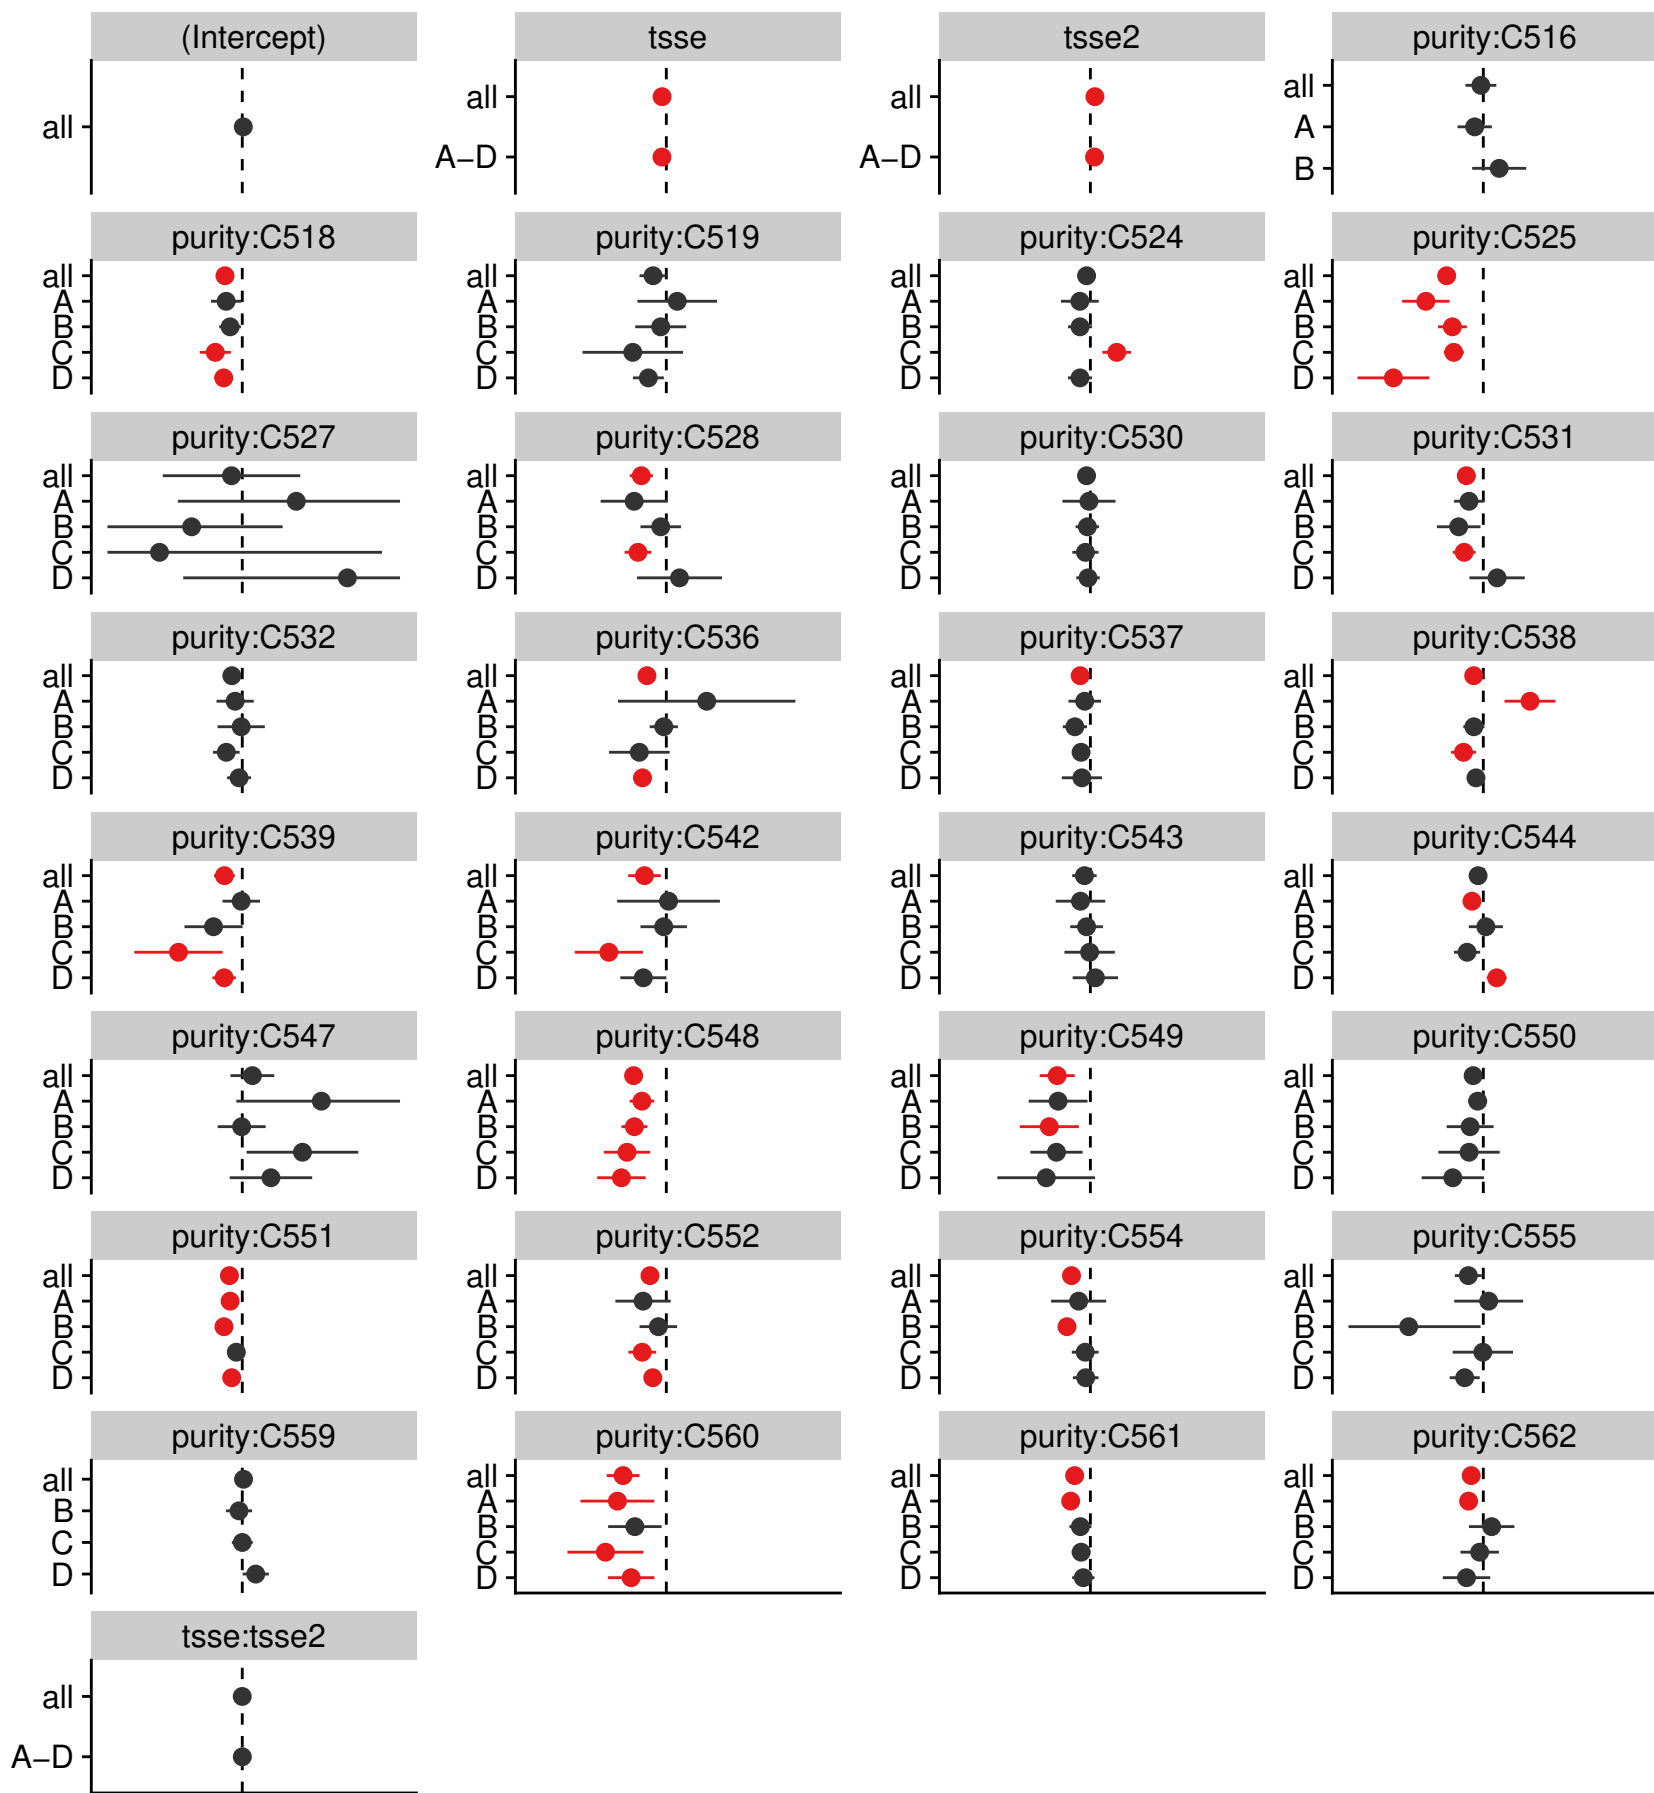

Coefficient

p\_c = < 2.22e-16, p\_sc = 1.5937e-07

# STAT2\_uc\_dTSS\_oPEAK

+ 2/33 (6/116), - 14/33 (43/116)

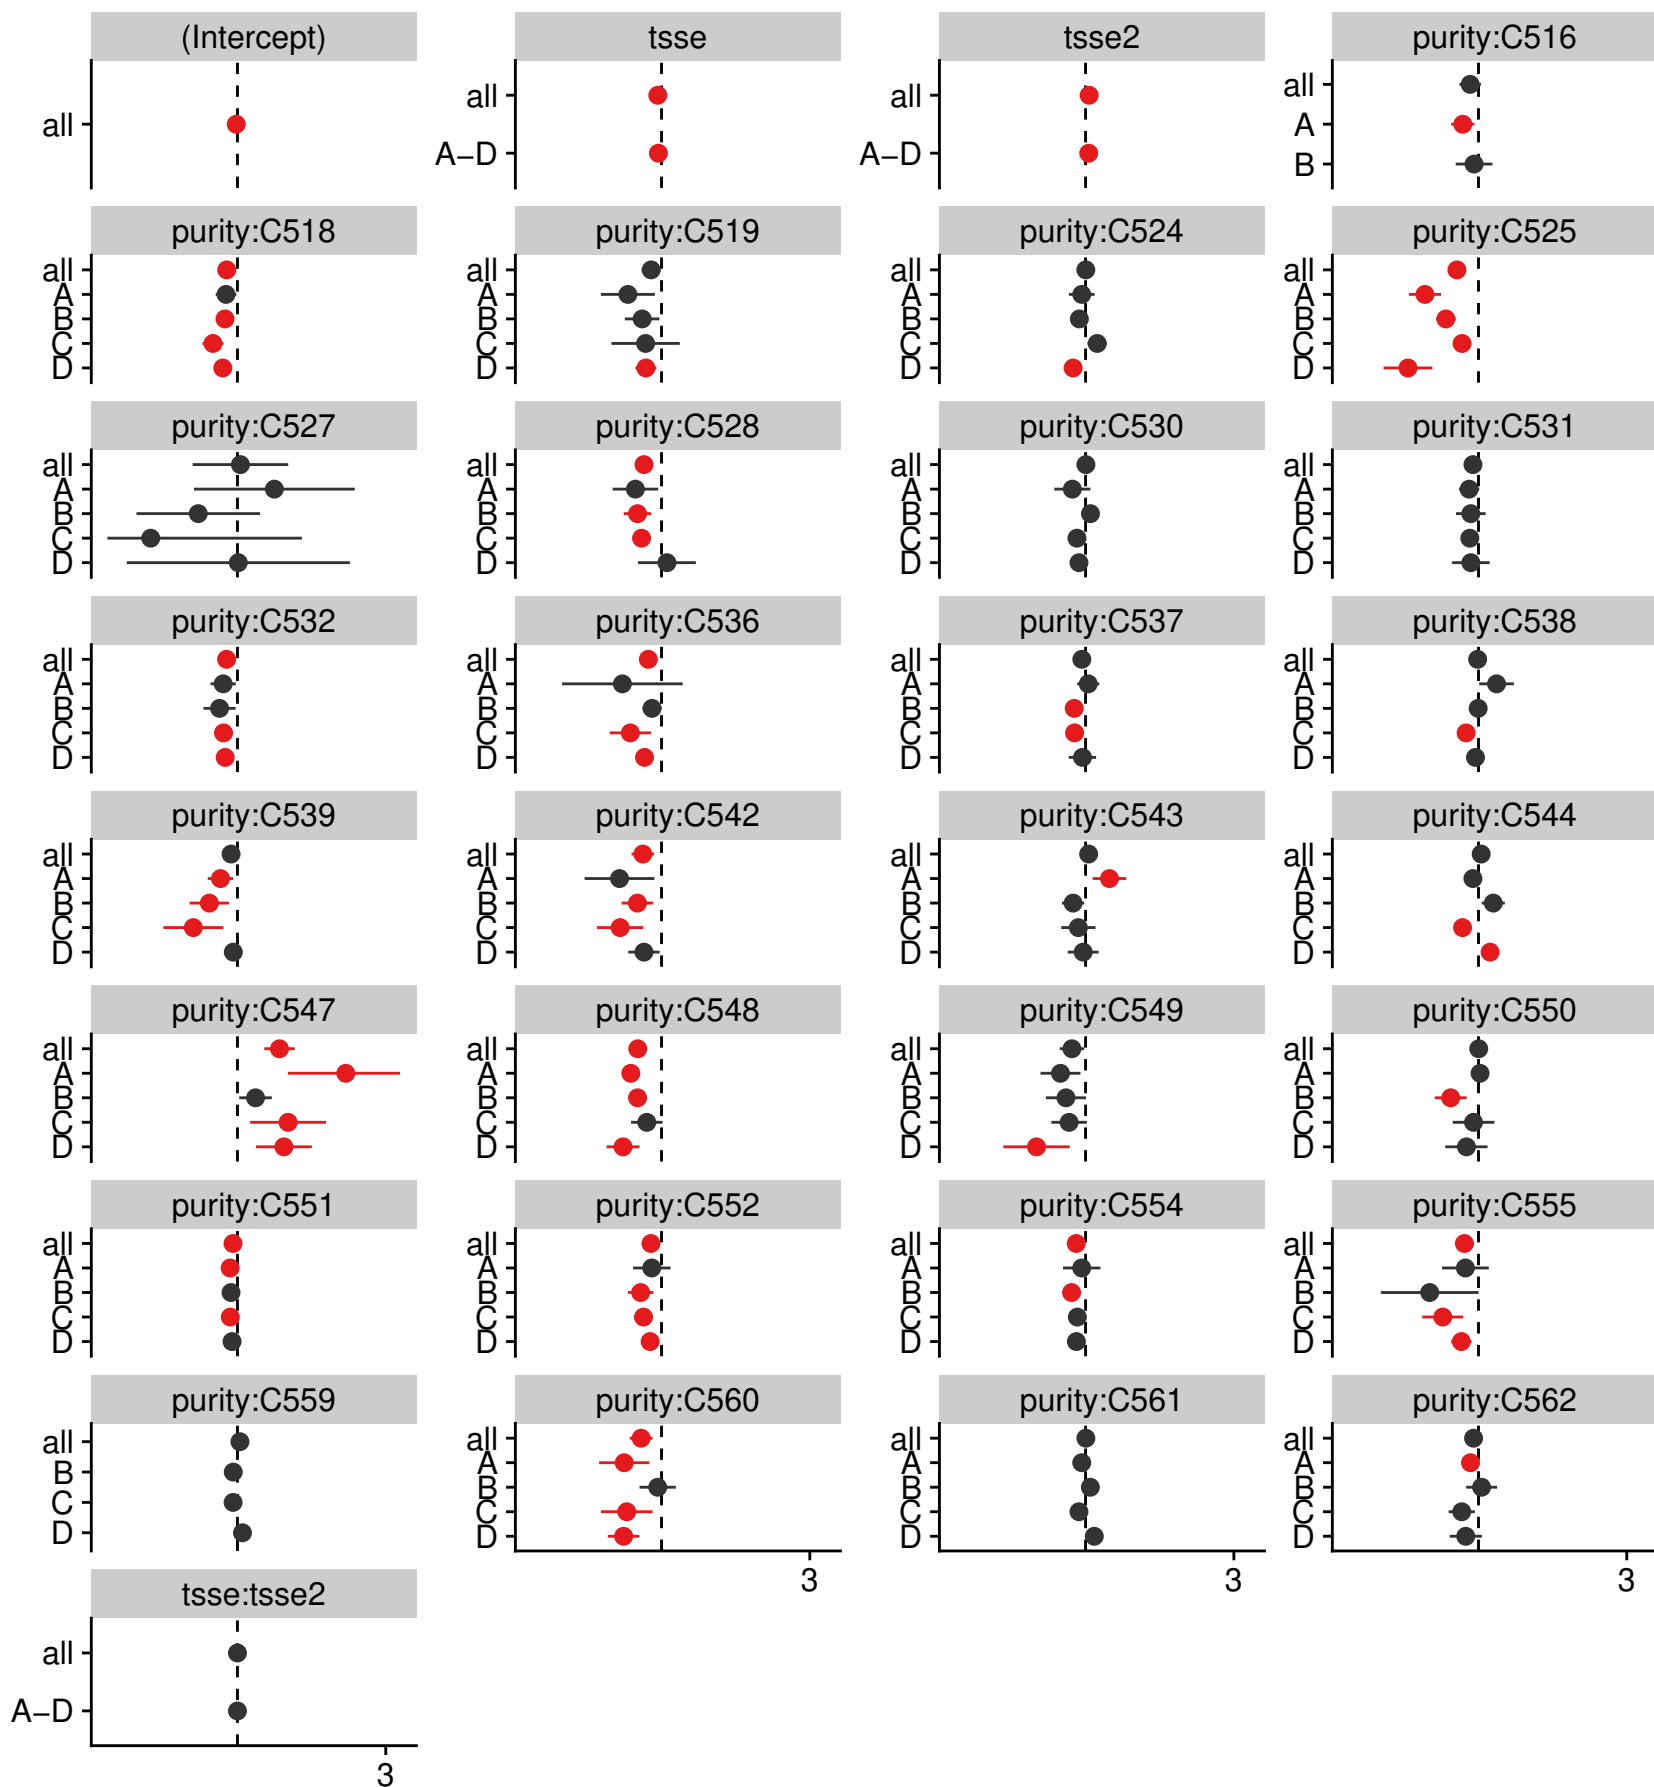

Coefficient

p\_c = < 2.22e-16, p\_sc = 4.8064e-12



# STAT2\_uc\_pTSS\_oPEAK

+ 1/33 (6/116), - 15/33 (25/116)

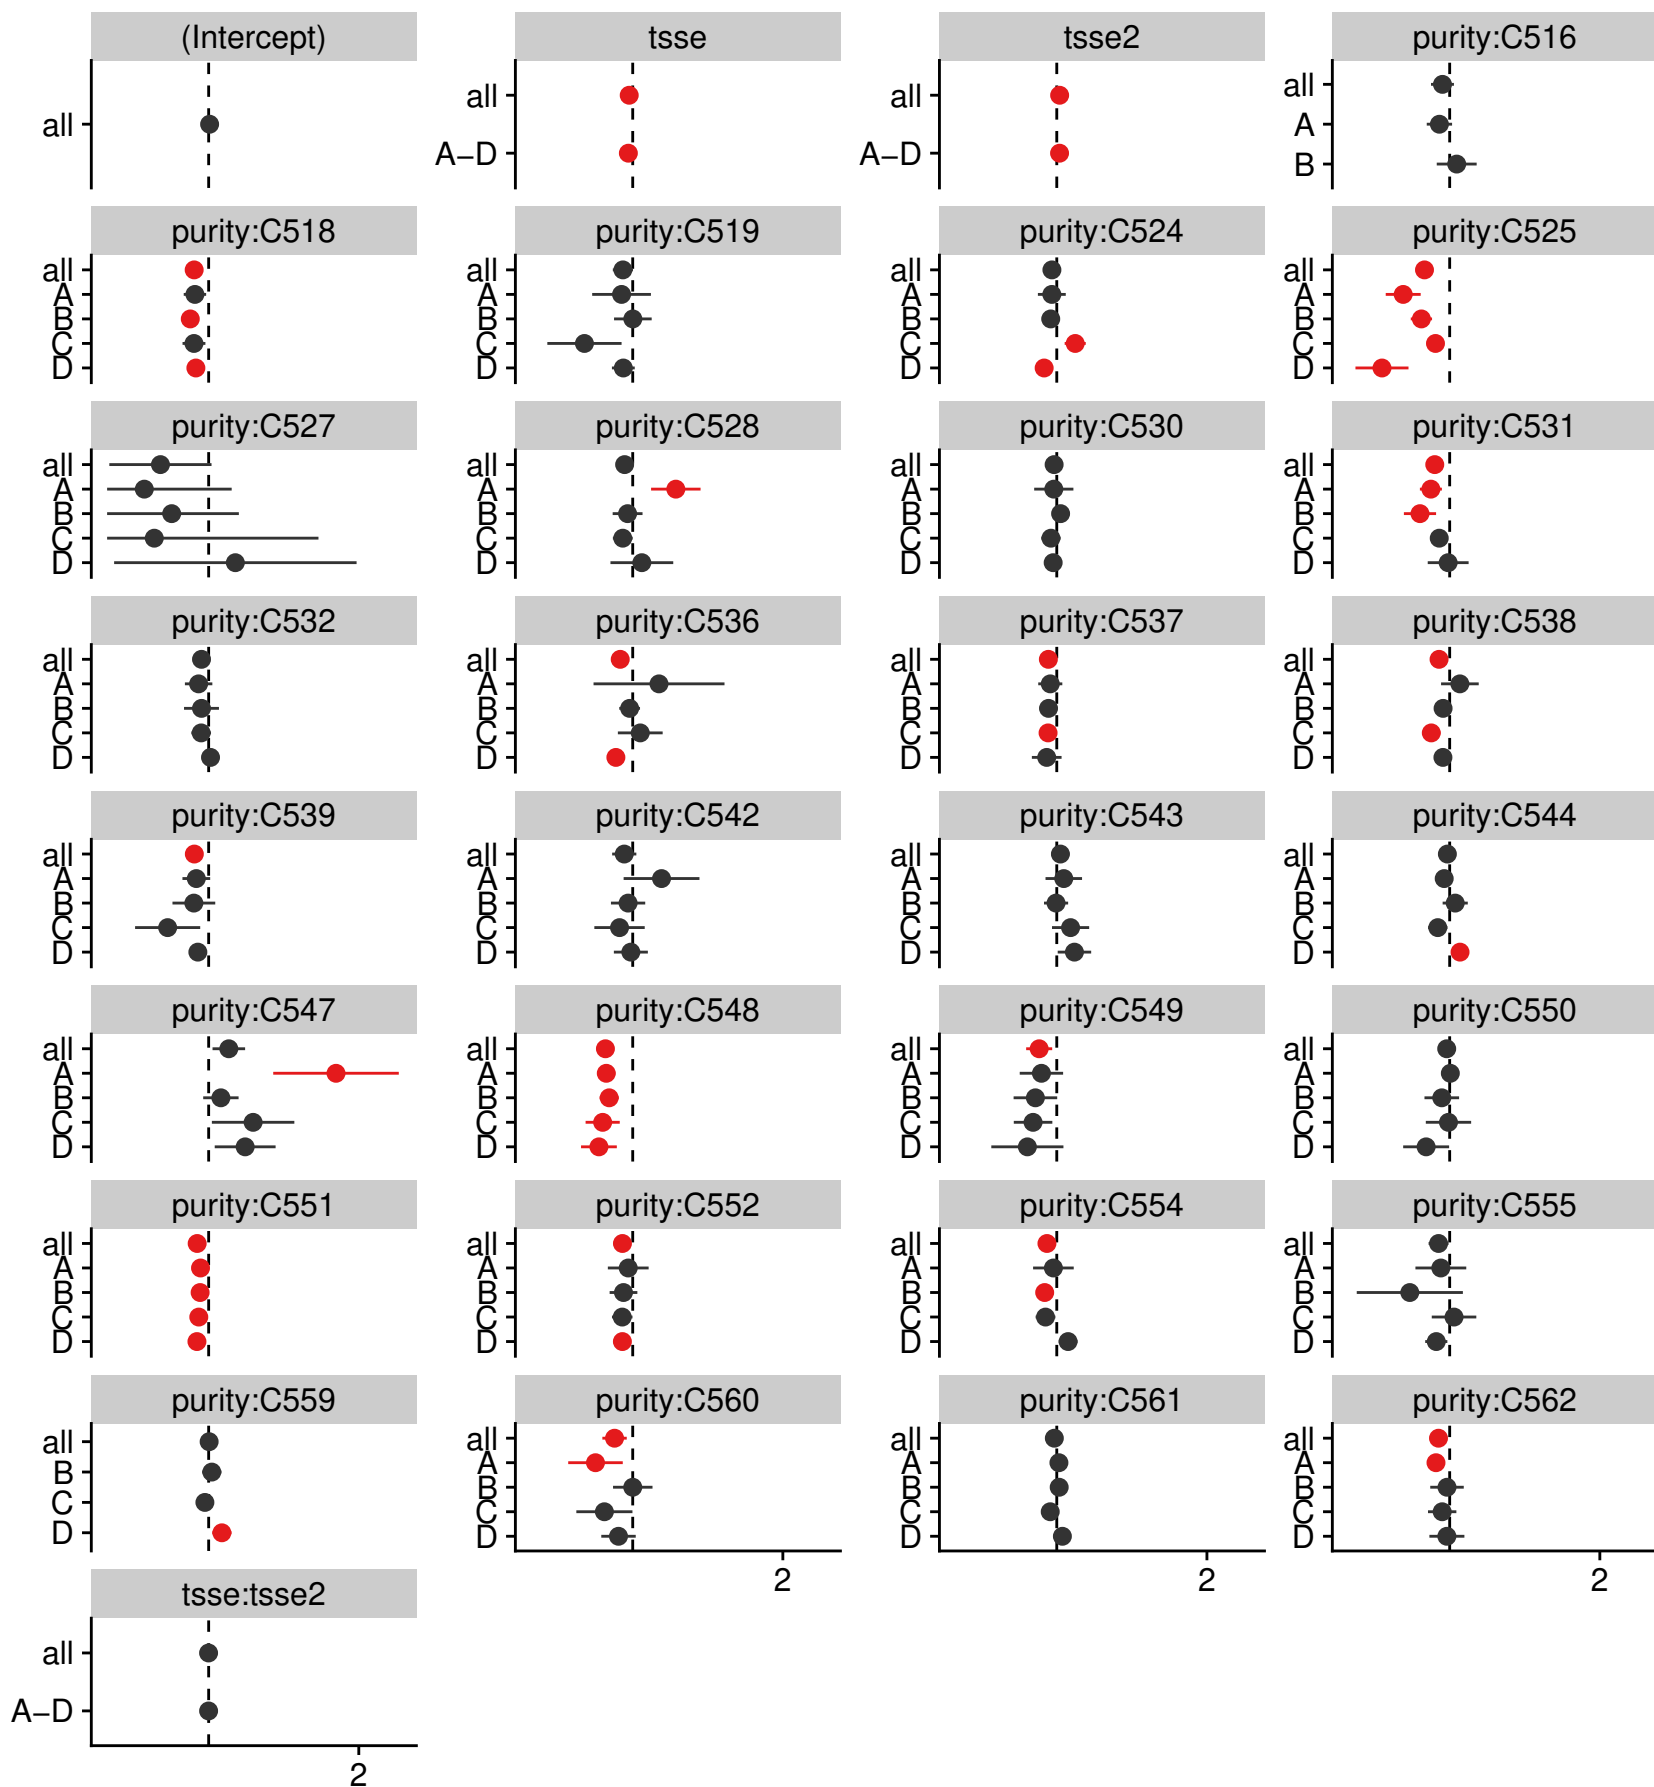

Coefficient

p\_c = < 2.22e-16, p\_sc = 1.0183e-08

# TBPL2\_uc\_cTSS\_nPEAK

+ 12/33 (1/116), - 6/33 (43/116)

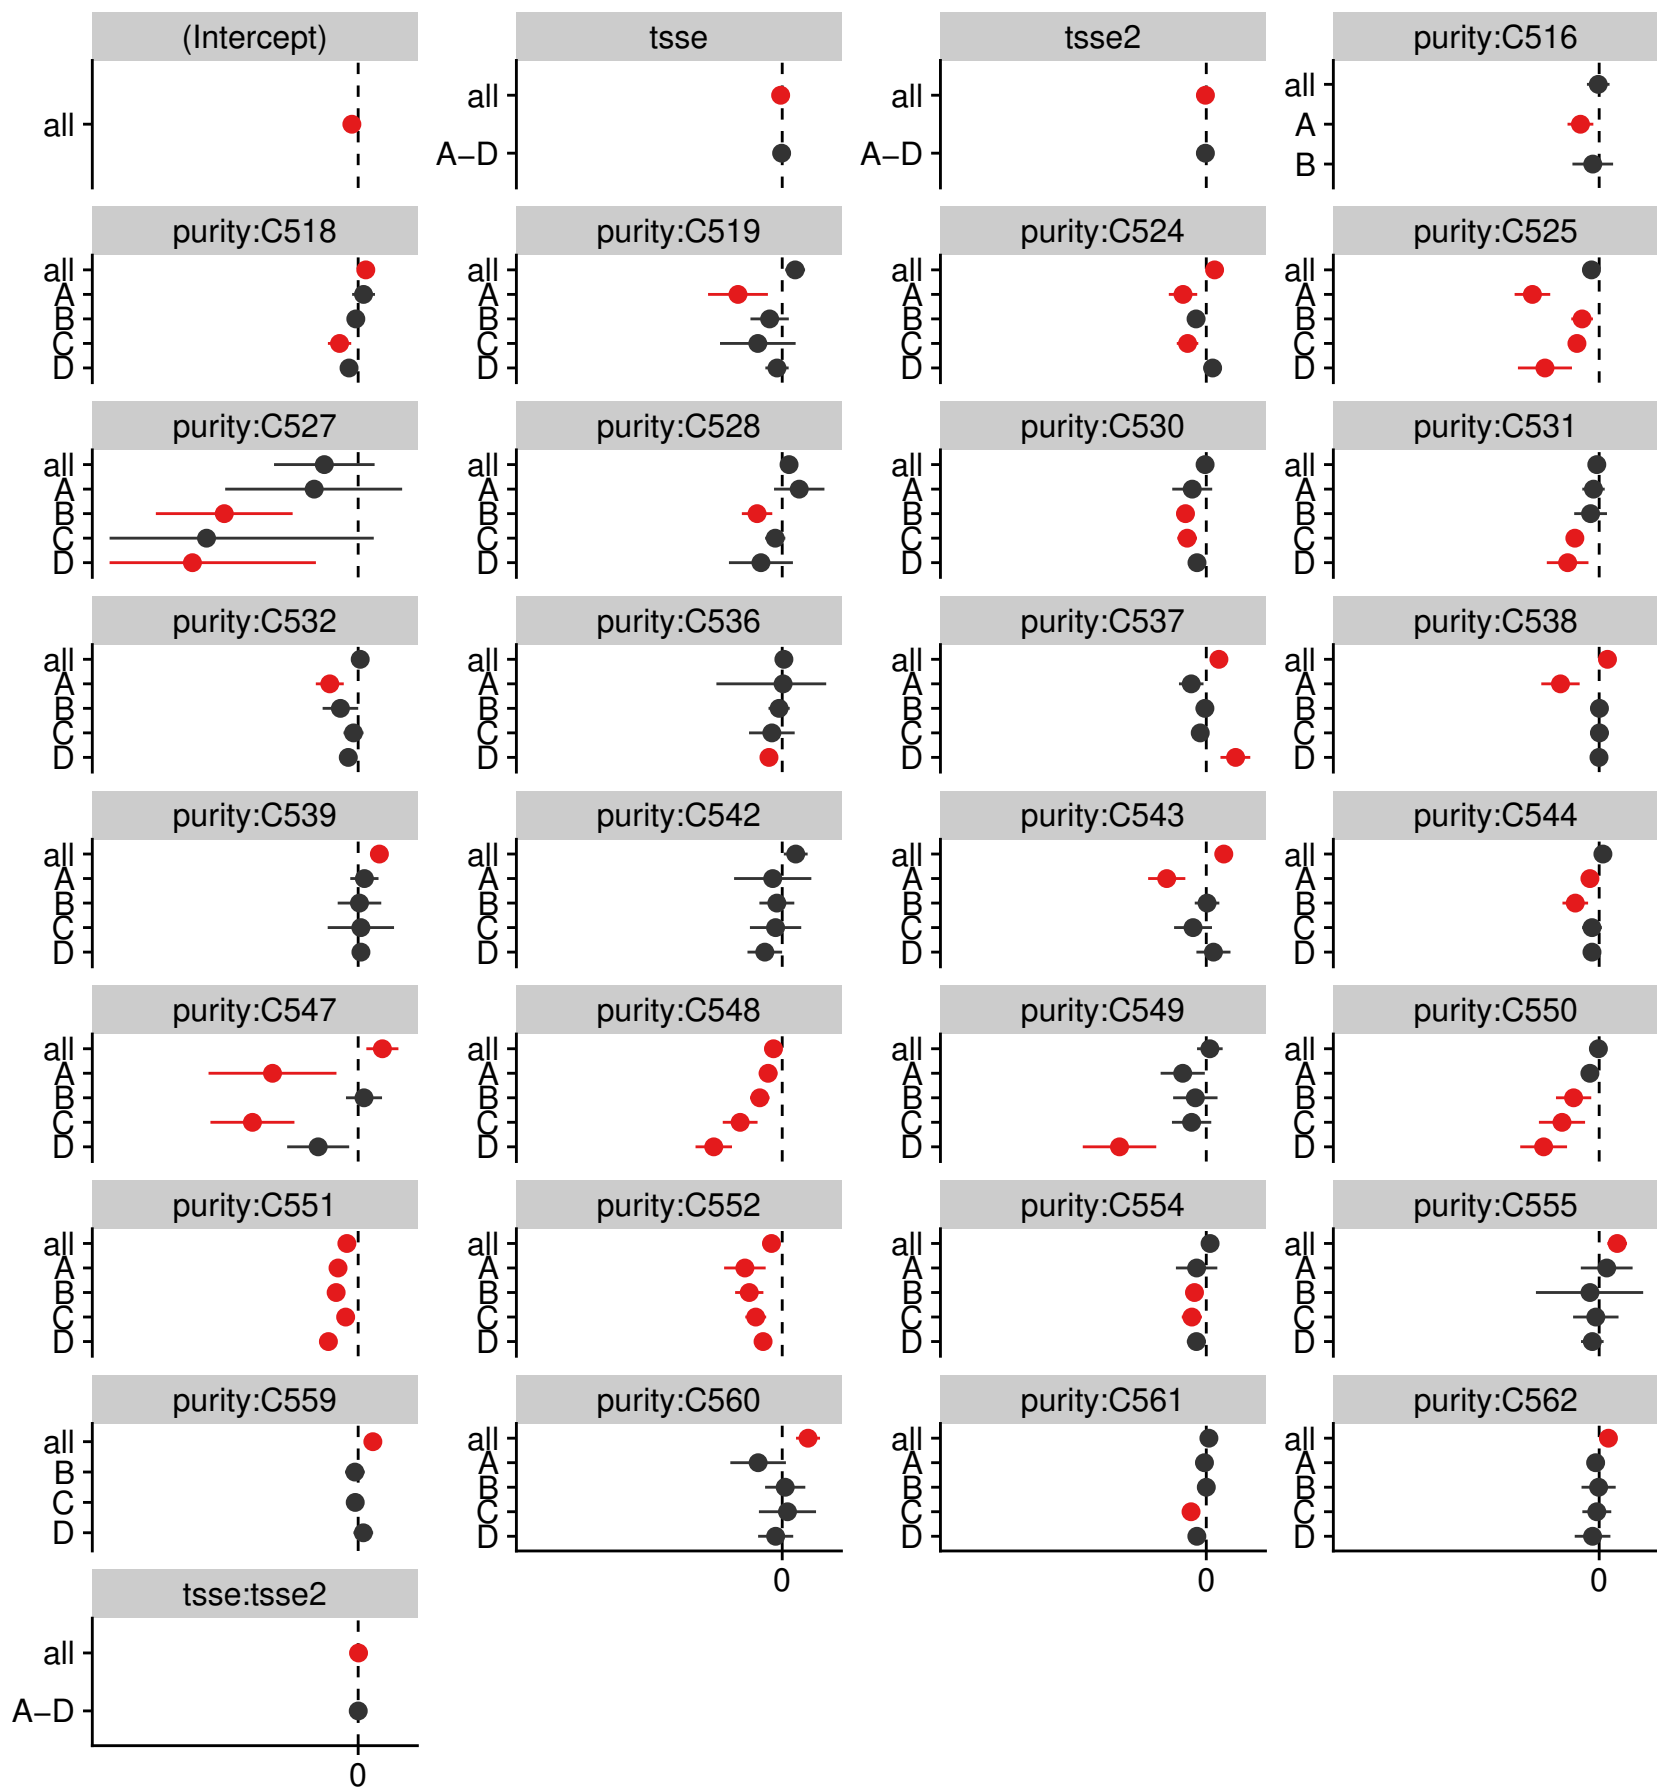

Coefficient

p\_c = < 2.22e-16, p\_sc = 0.0035746

# VAX1\_uc\_dTSS\_oPEAK

+ 13/33 (1/116), - 3/33 (41/116)



Coefficient

p\_c = < 2.22e-16, p\_sc = 0.1284

# VAX1\_uc\_pTSS\_nPEAK

+ 10/33 (1/116), - 5/33 (41/116)



Coefficient

p\_c = < 2.22e-16, p\_sc = 0.7374

# VAX2\_uc\_dTSS\_nPEAK

+ 15/33 (0/116), - 2/33 (36/116)



Coefficient

$p_c = < 2.22e-16$ ,  $p_{sc} = 0.074489$

# ZFH3\_uc\_dTSS\_nPEAK

+ 12/33 (2/116), - 4/33 (43/116)

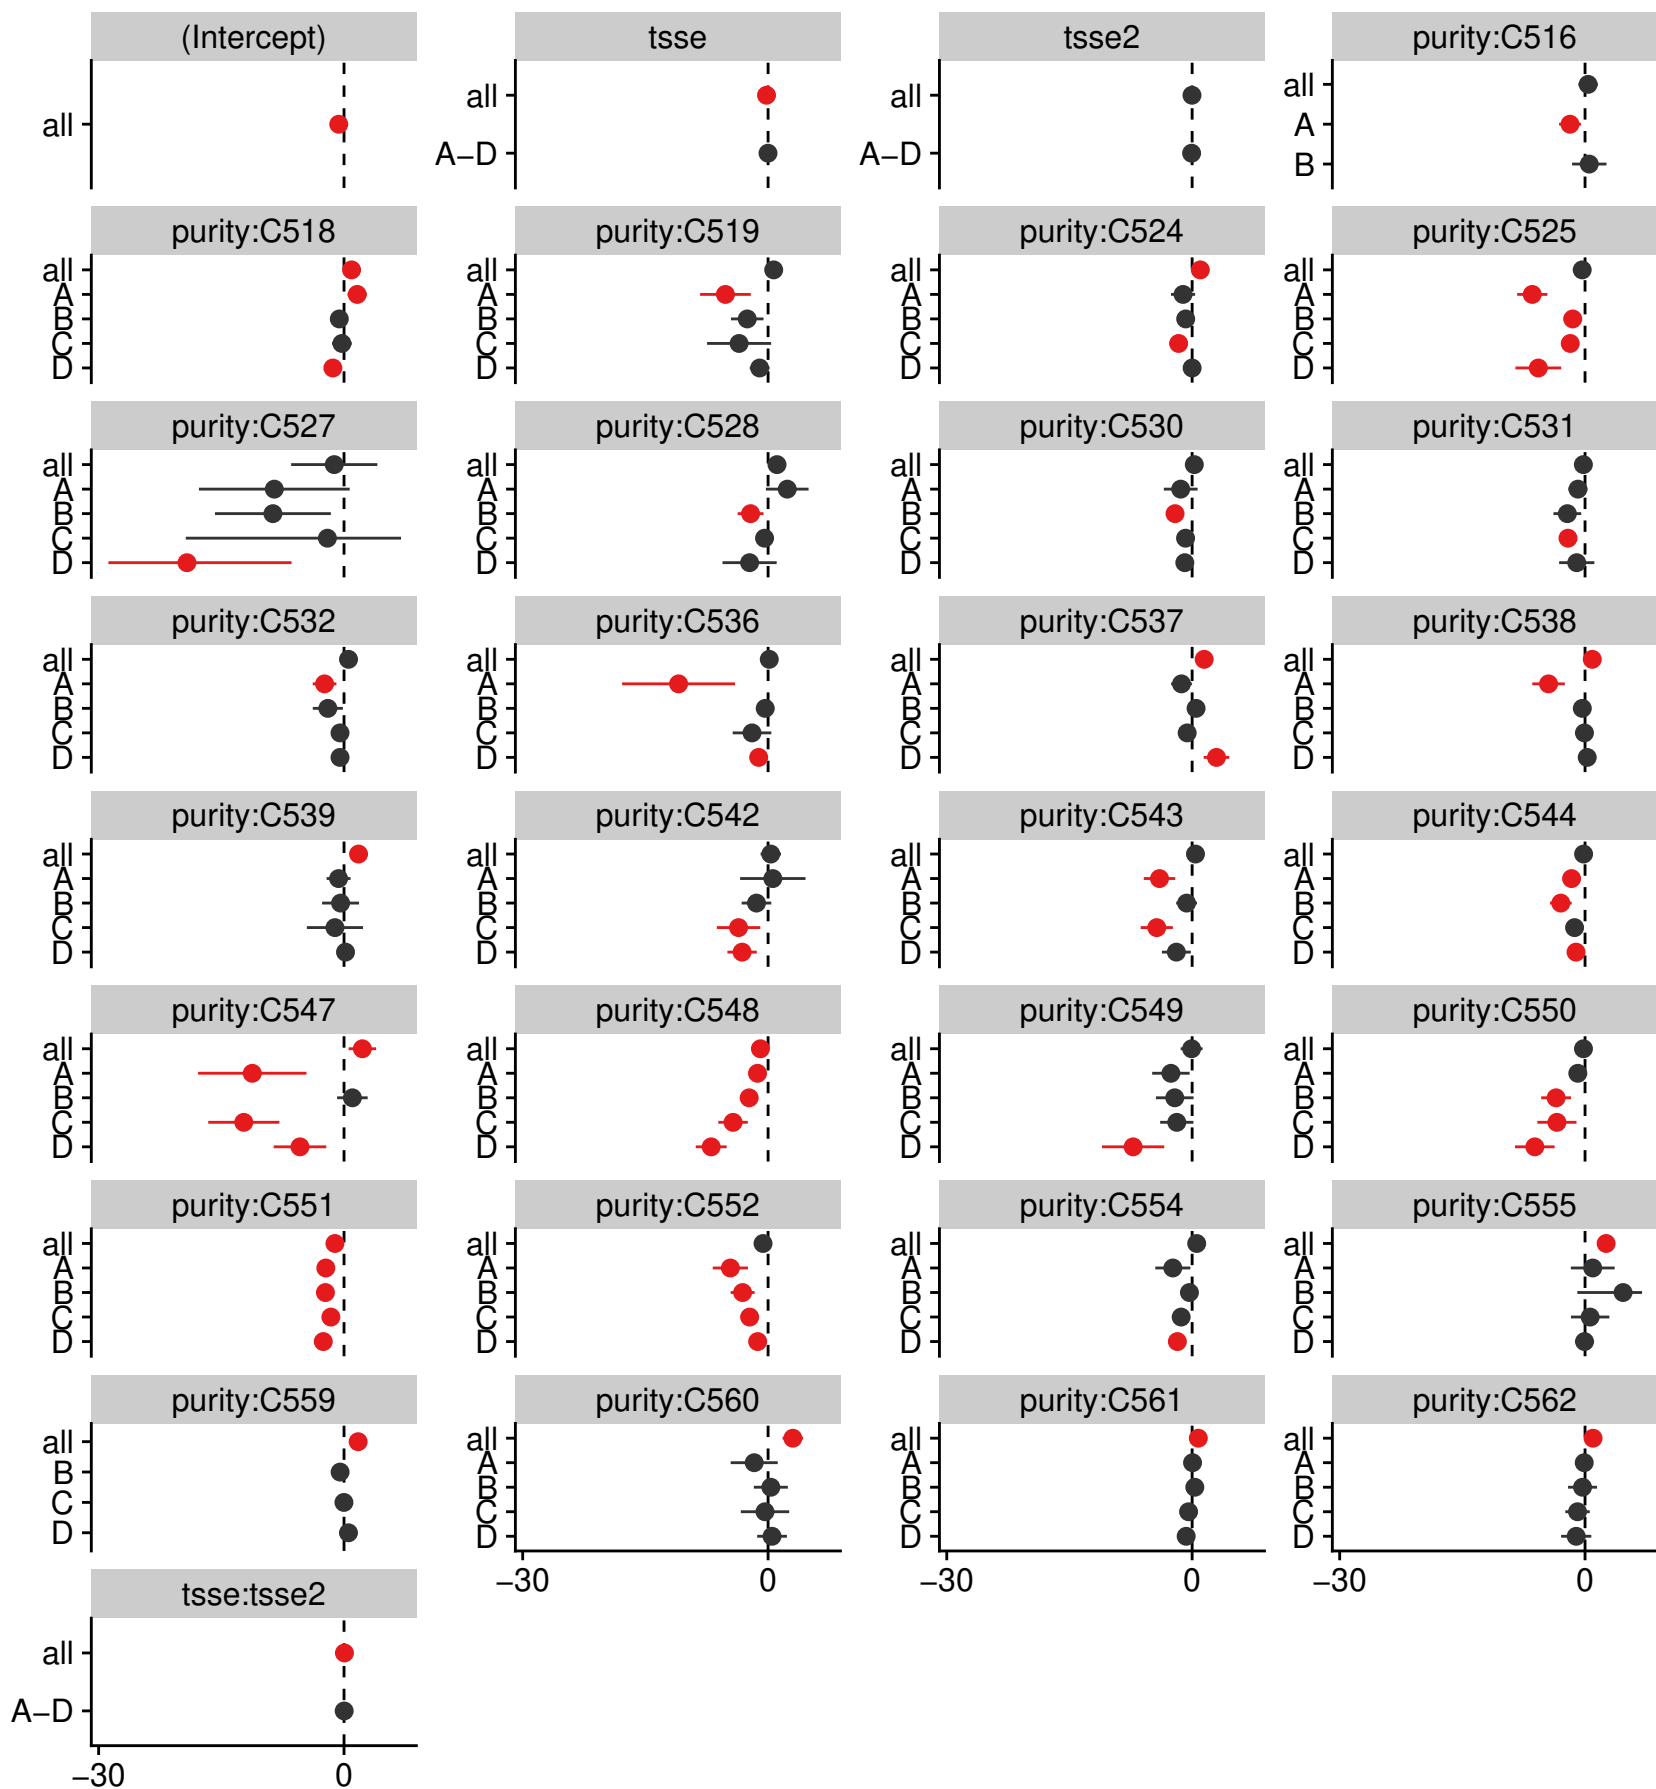

p\_c = < 2.22e-16, p\_sc = 7.8867e-05

# ZNF32\_uc\_dTSS\_nPEAK

+ 14/33 (30/116), - 2/33 (8/116)

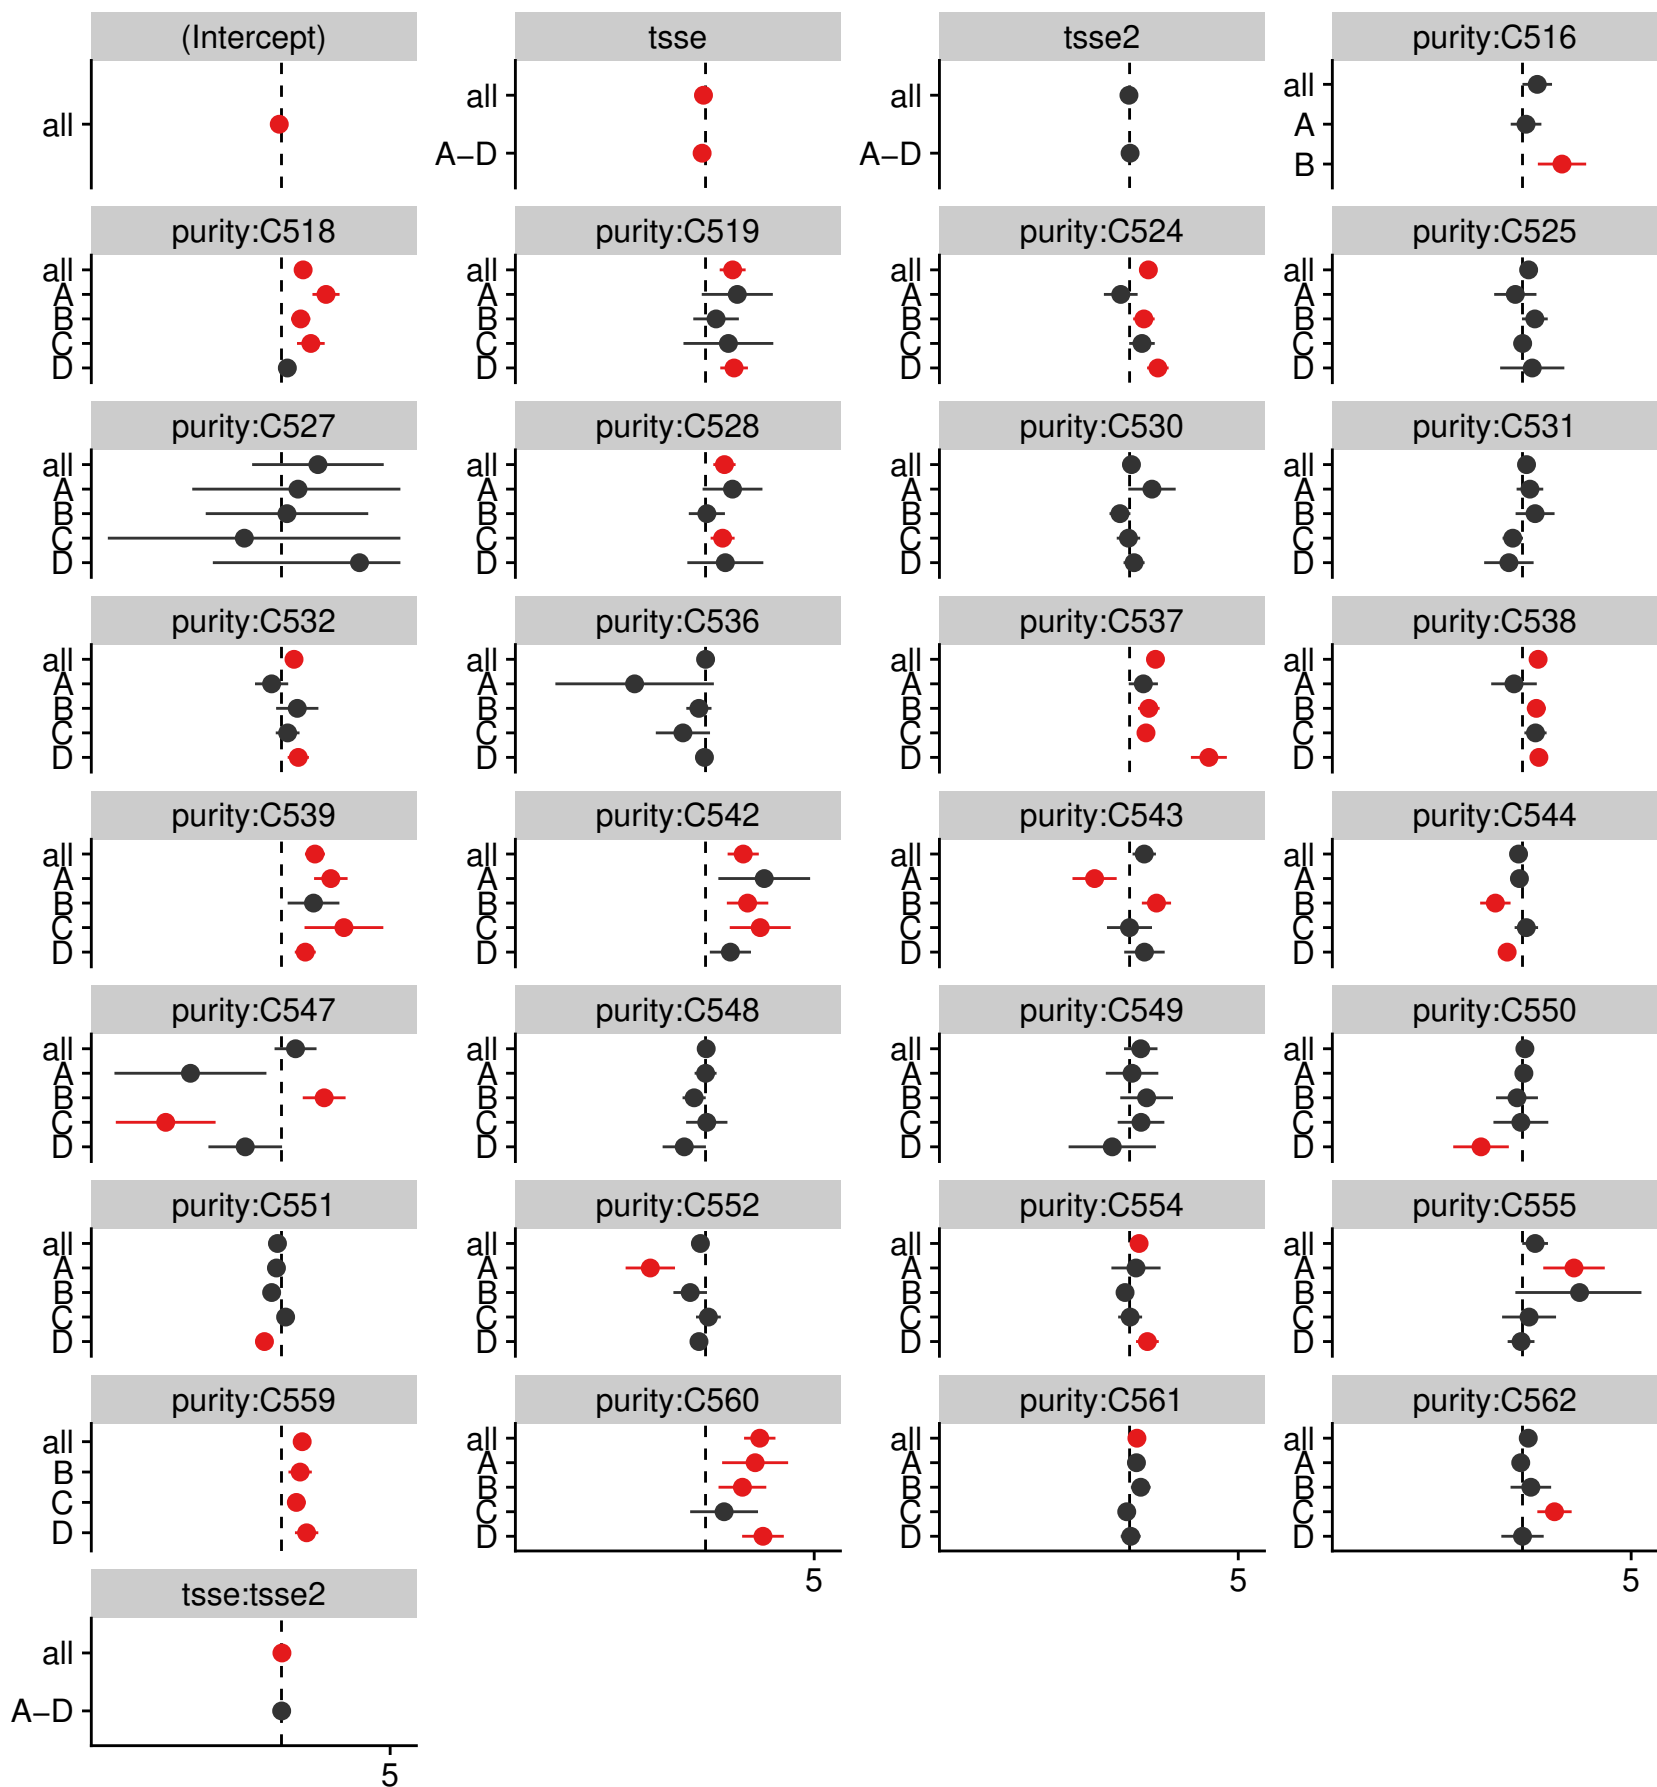

Coefficient

p\_c = < 2.22e-16, p\_sc = < 2.22e-16

# ZNF32\_uc\_dTSS\_oPEAK

+ 13/33 (12/116), - 3/33 (7/116)

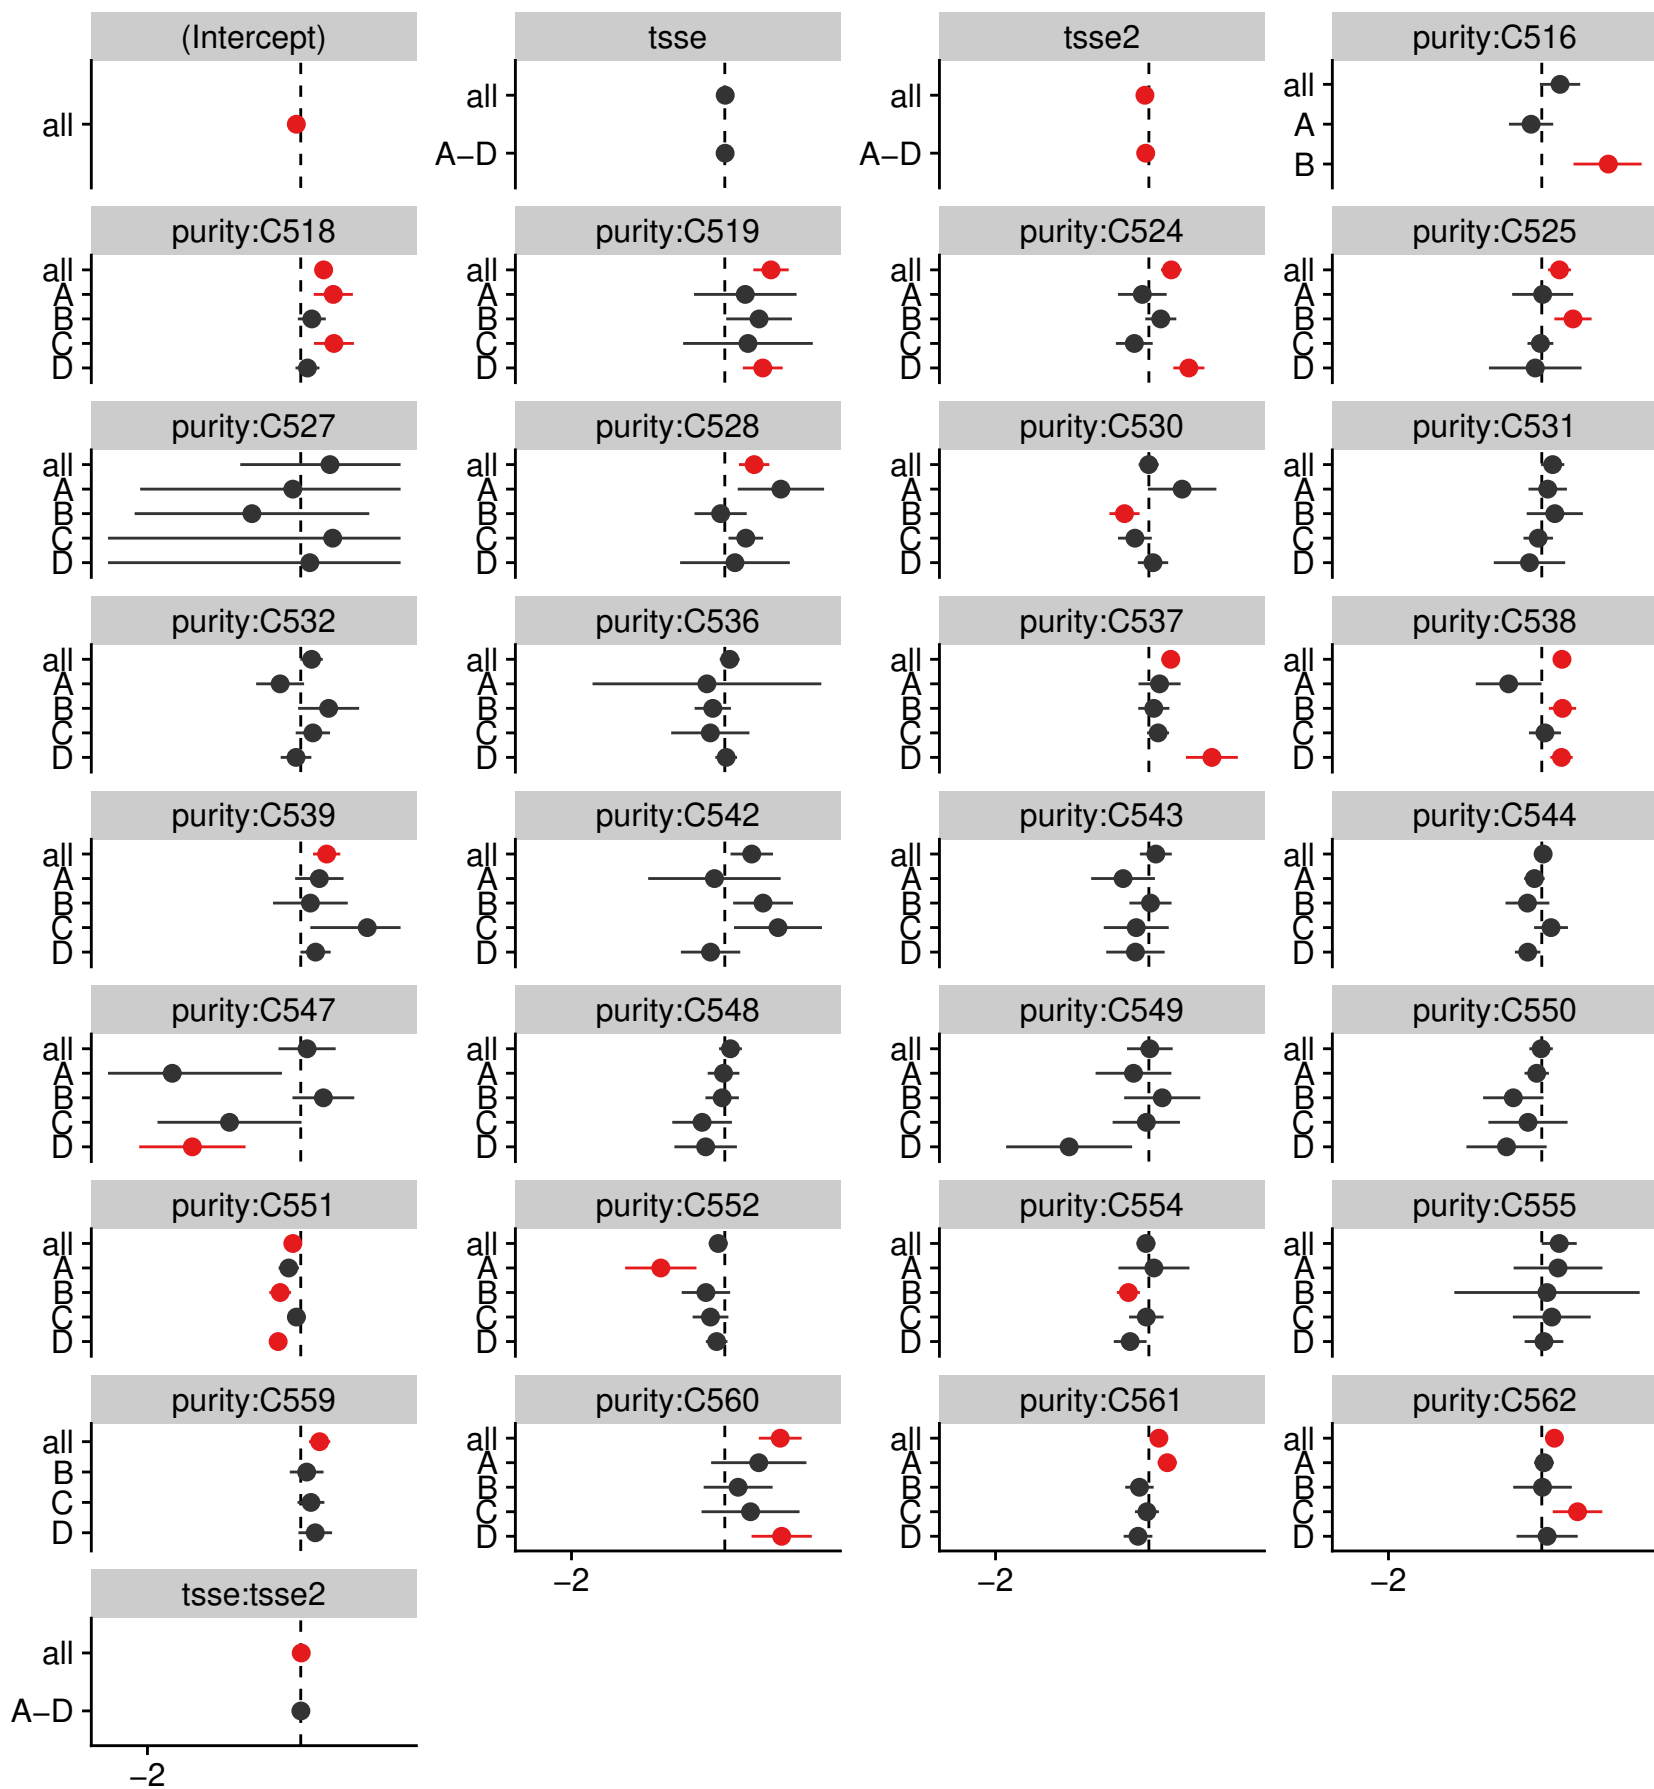

p\_c = < 2.22e-16, p\_sc = 1.1277e-09



# ZNF683\_uc\_cTSS\_oPEAK

+ 2/33 (5/116), - 14/33 (23/116)

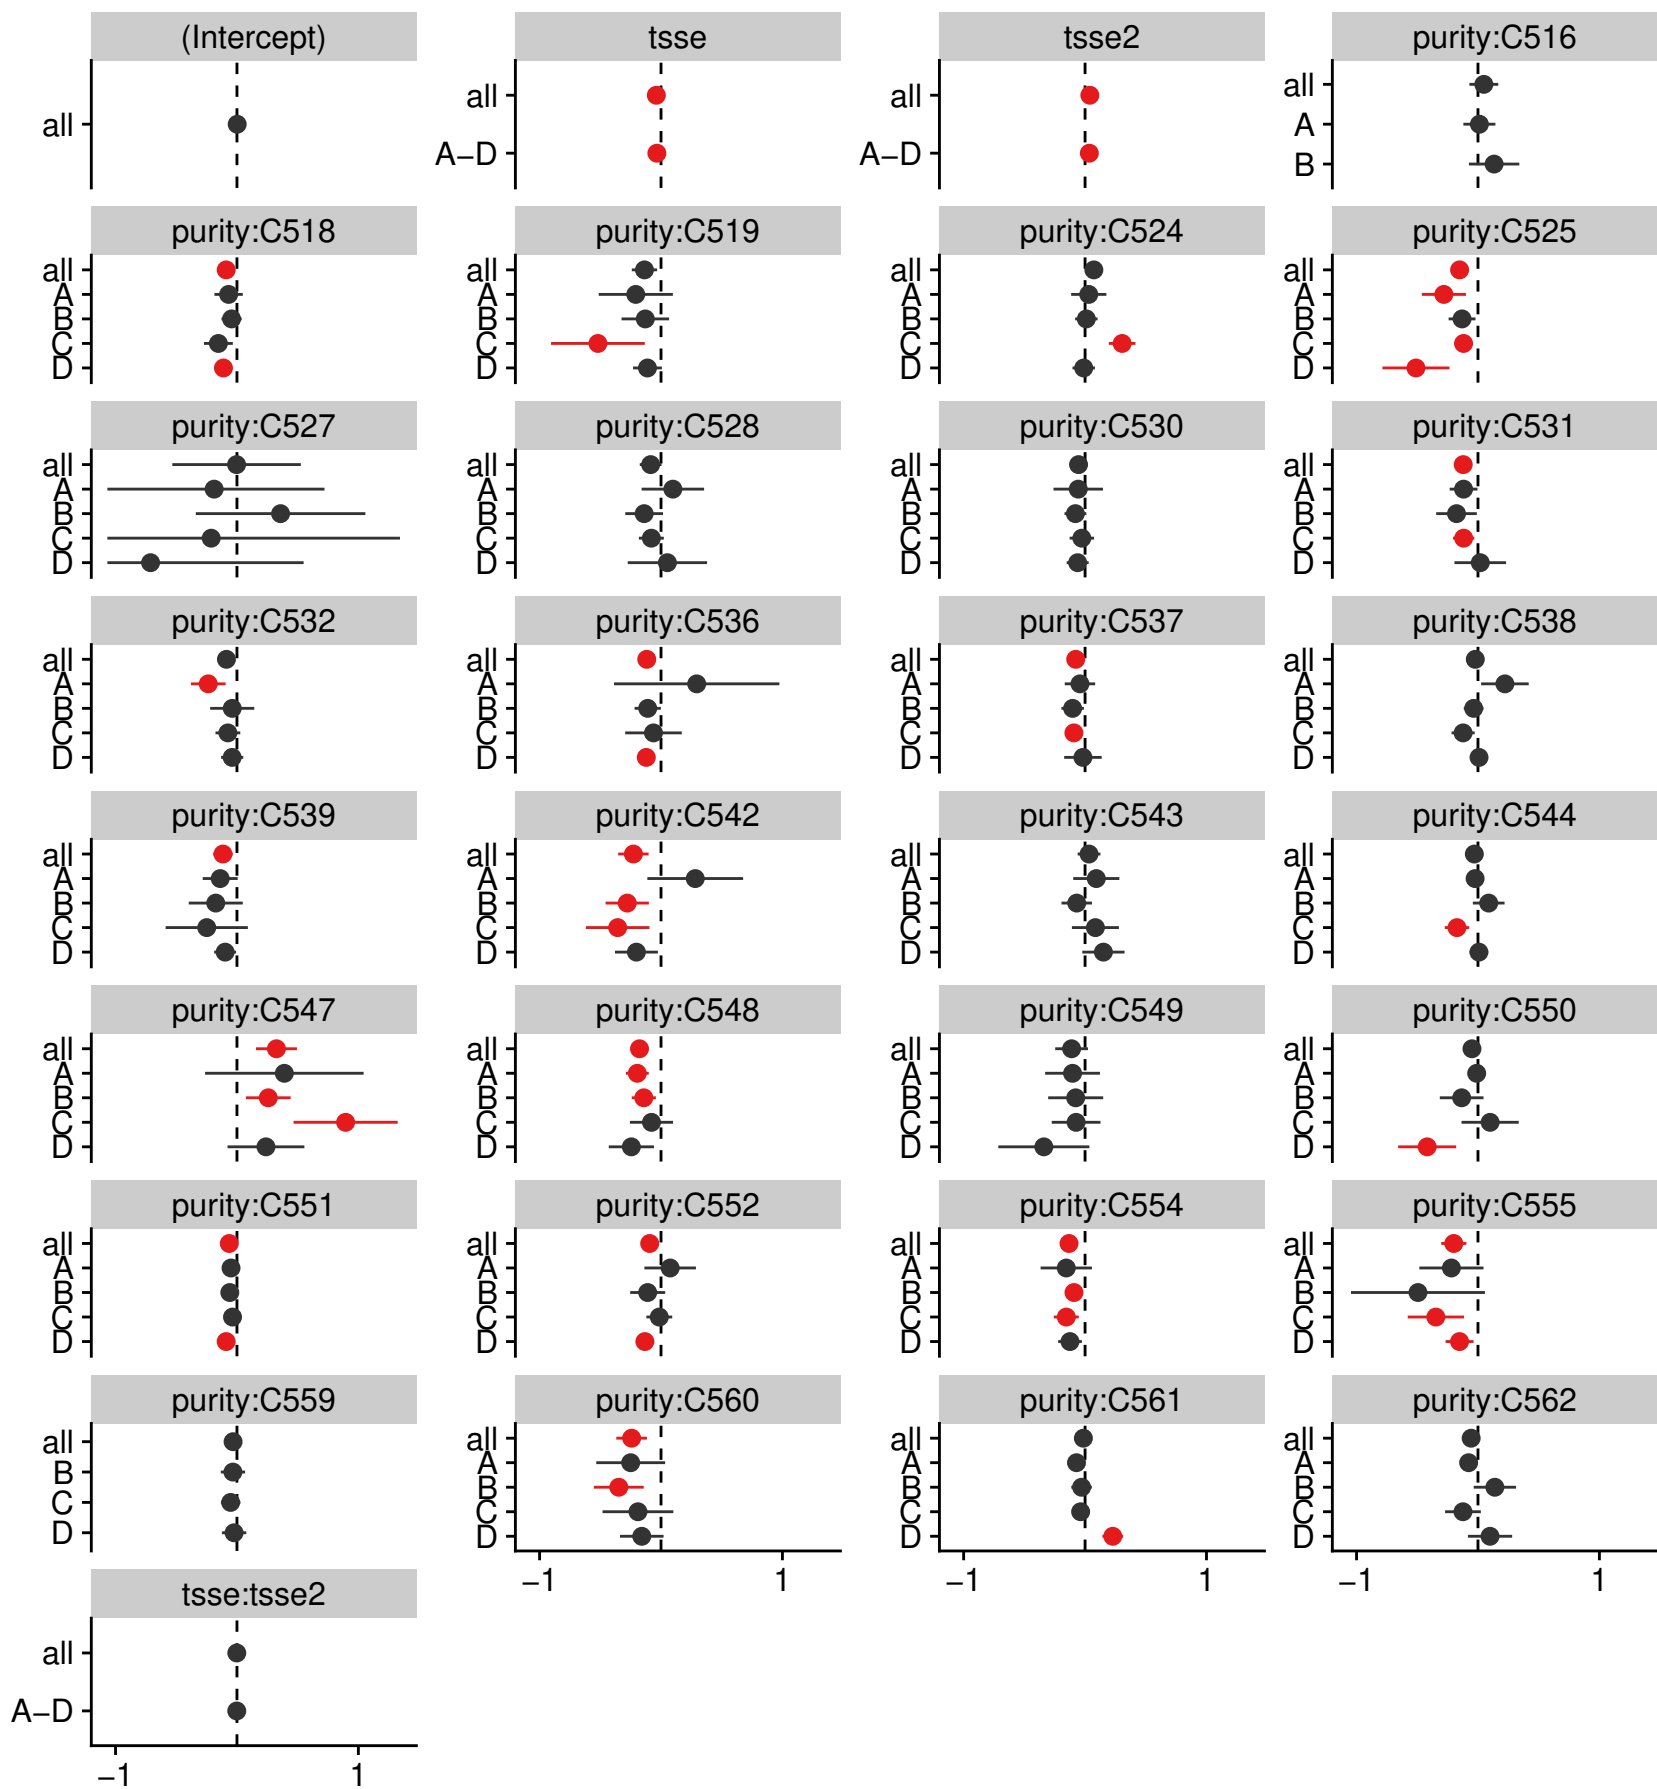

Coefficient

p\_c = < 2.22e-16, p\_sc = 5.8407e-08
